# Supplementary material for: Time-series transcriptome of Brachypodium distachyon during bacterial flagellin-induced pattern-triggered immunity
Source: Front Plant Sci. 2022 Sep 15;13:1004184. doi: 10.3389/fpls.2022.1004184 (PMC9521188; doi:10.3389/fpls.2022.1004184)
Supplement: Supplementary file 2 [file Table_1.xlsx]

## Sheet: TableS1
Supplementary Table S1. Summary of the pairing of RNA-seq reads with Trimmomatic
Sampling time	Replicates	RNA-seq read	Number	Sum of sequence length	minimun length	average length	maximum length
0 h	1	Forward sequence	24646603	2464660300	100	100	100
		Reverse sequence	24646603	2464660300	100	100	100
		Paired forward sequence	24512583	2445287821	36	99.8	100
		Paired reverse sequence	24512583	2441682498	36	99.6	100
		Unpaired forward sequence	103758	10131122	36	97.6	100
		Unpaired reverse sequence	28581	2761168	36	96.6	100
0 h	2	Forward sequence	24590705	2459070500	100	100	100
		Reverse sequence	24590705	2459070500	100	100	100
		Paired forward sequence	24433453	2437946564	36	99.8	100
		Paired reverse sequence	24433453	2432195609	36	99.5	100
		Unpaired forward sequence	130159	12752878	36	98	100
		Unpaired reverse sequence	25389	2442114	36	96.2	100
0 h	3	Forward sequence	24583600	2458360000	100	100	100
		Reverse sequence	24583600	2458360000	100	100	100
		Paired forward sequence	24435464	2437896355	36	99.8	100
		Paired reverse sequence	24433453	2432195609	36	99.5	100
		Unpaired forward sequence	120095	11729260	36	97.7	100
		Unpaired reverse sequence	26207	2519836	36	96.2	100
0.5 h	1	Forward sequence	24597530	2459753000	100	100	100
		Reverse sequence	24597530	2459753000	100	100	100
		Paired forward sequence	24451333	2438833334	36	99.7	100
		Paired reverse sequence	24451333	2434878553	36	99.6	100
		Unpaired forward sequence	116578	11366680	36	97.5	100
		Unpaired reverse sequence	27761	2672827	36	96.3	100
0.5 h	2	Forward sequence	24651584	2465158400	100	100	100
		Reverse sequence	24651584	2465158400	100	100	100
		Paired forward sequence	24494788	2443200794	36	99.7	100
		Paired reverse sequence	24494788	2437544597	36	99.5	100
		Unpaired forward sequence	127804	12493579	36	97.8	100
		Unpaired reverse sequence	27262	2626354	36	96.3	100
0.5 h	3	Forward sequence	24556384	2455638400	100	100	100
		Reverse sequence	24556384	2455638400	100	100	100
		Paired forward sequence	24379147	2431645486	36	99.7	100
		Paired reverse sequence	24379147	2424002623	36	99.4	100
		Unpaired forward sequence	148501	14533798	36	97.9	100
		Unpaired reverse sequence	26776	2563100	36	95.7	100
1 h	1	Forward sequence	24617205	2461720500	100	100	100
		Reverse sequence	24617205	2461720500	100	100	100
		Paired forward sequence	24466864	2440823533	36	99.8	100
		Paired reverse sequence	24466864	2435845776	36	99.6	100
		Unpaired forward sequence	121908	11920996	36	97.8	100
		Unpaired reverse sequence	26679	2569814	36	96.3	100
1 h	2	Forward sequence	24493178	2449317800	100	100	100
		Reverse sequence	24493178	2449317800	100	100	100
		Paired forward sequence	24302766	2424508721	36	99.8	100
		Paired reverse sequence	24302766	2416126997	36	99.4	100
		Unpaired forward sequence	163359	16029436	36	98.1	100
		Unpaired reverse sequence	25041	2398257	36	95.8	100
1 h	3	Forward sequence	24618696	2461869600	100	100	100
		Reverse sequence	24618696	2461869600	100	100	100
		Paired forward sequence	24467064	2441123425	36	99.8	100
		Paired reverse sequence	24467064	2435780790	36	99.6	100
		Unpaired forward sequence	123674	12098277	36	97.8	100
		Unpaired reverse sequence	26153	2516885	36	96.2	100
3 h	1	Forward sequence	24524519	2452451900	100	100	100
		Reverse sequence	24524519	2452451900	100	100	100
		Paired forward sequence	24334970	2427459214	36	99.8	100
		Paired reverse sequence	24334970	2418835433	36	99.4	100
		Unpaired forward sequence	162298	15917544	36	98.1	100
		Unpaired reverse sequence	25379	2430110	36	95.8	100
3 h	2	Forward sequence	24570834	2457083400	100	100	100
		Reverse sequence	24570834	2457083400	100	100	100
		Paired forward sequence	24412744	2435327622	36	99.8	100
		Paired reverse sequence	24412744	2429674415	36	99.5	100
		Unpaired forward sequence	130903	12812938	36	97.9	100
		Unpaired reverse sequence	25384	2439895	36	96.1	100
3 h	3	Forward sequence	24612948	2461294800	100	100	100
		Reverse sequence	24612948	2461294800	100	100	100
		Paired forward sequence	24479959	2442002841	36	99.8	100
		Paired reverse sequence	24479959	2438305619	36	99.6	100
		Unpaired forward sequence	104708	10220828	36	97.6	100
		Unpaired reverse sequence	26614	2569727	36	96.6	100
6 h	1	Forward sequence	24507162	2450716200	100	100	100
		Reverse sequence	24507162	2450716200	100	100	100
		Paired forward sequence	24244610	2418513133	36	99.8	100
		Paired reverse sequence	24244610	2412672323	36	99.5	100
		Unpaired forward sequence	232448	22945722	36	98.7	100
		Unpaired reverse sequence	28116	2703018	36	96.1	100
6 h	2	Forward sequence	24556992	2455699200	100	100	100
		Reverse sequence	24556992	2455699200	100	100	100
		Paired forward sequence	24395208	2433542981	36	99.8	100
		Paired reverse sequence	24395208	2427129802	36	99.5	100
		Unpaired forward sequence	136310	13345455	36	97.9	100
		Unpaired reverse sequence	23767	2278822	36	95.9	100
6 h	3	Forward sequence	24392376	2439237600	100	100	100
		Reverse sequence	24392376	2439237600	100	100	100
		Paired forward sequence	24065423	2400941357	36	99.8	100
		Paired reverse sequence	24065423	2392002510	36	99.4	100
		Unpaired forward sequence	302771	29961111	36	99	100
		Unpaired reverse sequence	22381	2143371	36	95.8	100
12 h	1	Forward sequence	24599206	2459920600	100	100	100
		Reverse sequence	24599206	2459920600	100	100	100
		Paired forward sequence	24593154	2449453382	3	99.6	100
		Paired reverse sequence	24593154	2439569137	3	99.2	100
		Unpaired forward sequence	5999	573442	12	95.6	100
		Unpaired reverse sequence	53	5057	22	95.4	100
12 h	2	Forward sequence	24505984	2450598400	100	100	100
		Reverse sequence	24505984	2450598400	100	100	100
		Paired forward sequence	24496710	2441456905	3	99.7	100
		Paired reverse sequence	24496710	2424877733	3	99	100
		Unpaired forward sequence	9210	889896	14	96.6	100
		Unpaired reverse sequence	64	6242	7	97.5	100
12 h	3	Forward sequence	24564267	2456426700	100	100	100
		Reverse sequence	24564267	2456426700	100	100	100
		Paired forward sequence	24555837	2447366286	3	99.7	100
		Paired reverse sequence	24555837	2431433767	3	99	100
		Unpaired forward sequence	8362	810963	14	97	100
		Unpaired reverse sequence	68	6443	12	94.8	100
