# Supplementary material for: Time-series transcriptome of Brachypodium distachyon during bacterial flagellin-induced pattern-triggered immunity
Source: Front Plant Sci. 2022 Sep 15;13:1004184. doi: 10.3389/fpls.2022.1004184 (PMC9521188; doi:10.3389/fpls.2022.1004184)
Supplement: Supplementary file 3 [file Table_2.xlsx]

## Sheet: TableS2
Supplementary Table S2. Mapping results of RNA-seq reads on Brachypodium distachyon genome using STAR-RSEM pipeline
Sampling time	0 h			0.5 h			1 h			3 h			6 h			12 h
Replicates	1	2	3	1	2	3	1	2	3	1	2	3	1	2	3	1	2	3
Number of input reads |	24512583	24433453	24435464	24451333	24494788	24379147	24466864	24302766	24467064	24334970	24412744	24479959	24244610	24395208	24065423	24593154	24496710	24555837
Average input read length |	199	199	199	199	199	199	199	199	199	199	199	199	199	199	199	198	198	198
UNIQUE READS:
Uniquely mapped reads number |	21662507	21233959	22217724	22544360	22363404	22337152	22220679	21874633	22292728	22580411	22473410	22713437	22433327	22999507	22483503	23503831	23136791	23565885
Uniquely mapped reads % |	0.8837	0.8691	0.9092	0.922	0.913	0.9162	0.9082	0.9001	0.9111	0.9279	0.9206	0.9278	0.9253	0.9428	0.9343	0.9557	0.9445	0.9597
Average mapped length |	198.65	198.63	198.6	198.64	198.56	198.45	198.61	198.5	198.6	198.46	198.43	198.61	198.49	198.54	198.32	198.1	197.91	197.97
Number of splices: Total |	9309035	8659429	8657390	11530121	11776001	11426823	10444990	10862322	10673370	10901364	10817720	11235081	10239815	12393340	11415243	13642476	12331681	13718061
Number of splices: Annotated (sjdb) |	9056363	8419174	8404201	11248726	11496293	11144505	10171351	10591504	10397246	10633810	10537984	10957566	9946673	12074836	11109882	13299782	11994647	13366780
Number of splices: GT/AG |	9176563	8534559	8534850	11373980	11613422	11268171	10301557	10715464	10524837	10755764	10669618	11084692	10097875	12226433	11258378	13450753	12157195	13526022
Number of splices: GC/AG |	111736	105686	102926	133360	138832	134512	121782	126437	125765	123535	122759	126956	119834	141988	133373	166128	151744	167229
Number of splices: AT/AC |	3877	3472	3509	5338	5757	5421	4913	5265	5161	5492	5469	5716	5282	6594	5804	6611	5620	6809
Number of splices: Non-canonical |	16859	15712	16105	17443	17990	18719	16738	15156	17607	16573	19874	17717	16824	18325	17688	18984	17122	18001
Mismatch rate per base, % |	0.0019	0.0018	0.002	0.002	0.0021	0.0022	0.0019	0.002	0.0021	0.0021	0.0021	0.0021	0.0019	0.002	0.0022	0.0022	0.0019	0.002
Deletion rate per base |	0.0001	0.0001	0.0001	0.0001	0.0001	0.0001	0.0001	0.0001	0.0001	0.0001	0.0001	0.0001	0.0001	0.0001	0.0001	0.0001	0.0001	0.0001
Deletion average length |	1.55	1.5	1.64	1.66	1.61	1.66	1.58	1.52	1.66	1.59	1.68	1.64	1.58	1.59	1.64	1.7	1.53	1.58
Insertion rate per base |	0.0001	0.0001	0.0001	0.0001	0.0001	0.0001	0.0001	0	0.0001	0.0001	0.0001	0.0001	0.0001	0.0001	0.0001	0.0001	0	0
Insertion average length |	1.36	1.28	1.4	1.45	1.45	1.51	1.36	1.31	1.52	1.43	1.56	1.48	1.4	1.44	1.47	1.56	1.32	1.39
MULTI-MAPPING READS:
Number of reads mapped to multiple loci |	1691094	1635307	1252937	1204403	1283347	1181440	1297538	1316288	1350150	978371	1136444	978016	1053426	776360	844609	580634	749134	531075
% of reads mapped to multiple loci |	0.069	0.0669	0.0513	0.0493	0.0524	0.0485	0.053	0.0542	0.0552	0.0402	0.0466	0.04	0.0434	0.0318	0.0351	0.0236	0.0306	0.0216
Number of reads mapped to too many loci |	87848	126012	74532	47284	59635	59698	74527	102152	60313	58209	57356	54307	56449	39771	48249	31731	45571	28112
% of reads mapped to too many loci |	0.0036	0.0052	0.0031	0.0019	0.0024	0.0024	0.003	0.0042	0.0025	0.0024	0.0023	0.0022	0.0023	0.0016	0.002	0.0013	0.0019	0.0011
UNMAPPED READS:
% of reads unmapped: too many mismatches |	0	0	0	0	0	0	0	0	0	0	0	0	0	0	0	0	0	0
% of reads unmapped: too short |	0.0109	0.0105	0.0122	0.0106	0.0097	0.0098	0.01	0.0099	0.0115	0.0104	0.0123	0.0131	0.0126	0.0121	0.0146	0.0114	0.0108	0.0105
% of reads unmapped: other |	0.0328	0.0484	0.0242	0.0162	0.0225	0.023	0.0257	0.0317	0.0197	0.0191	0.0182	0.0169	0.0164	0.0117	0.014	0.008	0.0123	0.007
CHIMERIC READS:
Number of chimeric reads |	0	0	0	0	0	0	0	0	0	0	0	0	0	0	0	0	0	0
% of chimeric reads |	0	0	0	0	0	0	0	0	0	0	0	0	0	0	0	0	0	0
