# Supplementary material for: Time-series transcriptome of Brachypodium distachyon during bacterial flagellin-induced pattern-triggered immunity
Source: Front Plant Sci. 2022 Sep 15;13:1004184. doi: 10.3389/fpls.2022.1004184 (PMC9521188; doi:10.3389/fpls.2022.1004184)
Supplement: Supplementary file 4 [file Table_3.xlsx]

## Sheet: TableS3
Supplementary Table S3. Count data for each gene of Brachypodium distachyon obtained from RNA-seq results in this study using edgeR
Sampling time		0 h				0.5 h				1 h				3 h				6 h				12 h
Replicates		1	2	3		1	2	3		1	2	3		1	2	3		1	2	3		1	2	3
Bradi0012s00100		5738.65	3631.45	4178.84		7564.93	10851.1	11075.9		6457	5421.11	11356		10046.9	12606.6	13185.4		8498.88	12442.5	13056.5		20537	6421.84	10895.7
Bradi0012s00201		32	47	41		46	63	47		56	57	57		64	58	67		101	80	85		85	93	68
Bradi0014s00100		0	0	0		0	0	0		0	0	0		0	0	0		0	0	0		0	0	0
Bradi0135s00100		0	0	0		0	0	0		0	0	0		0	0	0		0	0	0		0	0	0
Bradi0180s00100		0	0	0		0	0	0		0	0	0		0	0	0		0	0	0		0	0	0
Bradi1g00200		0	0	0		0	1	0		0	0	0		0	0	0		0	0	0		0	0	0
Bradi1g00210		4.6	0	6.19		9.75	16.75	19.77		1.53	0	22.13		13.53	18.37	18.95		9.1	22.87	29.55		43.99	0	8.89
Bradi1g00213		7	8	5		7	11	8		16	3	6		16	17	19		12	23	17		27	15	25
Bradi1g00215		0	0	0		0	0	0		0	0	0		0	0	0		0	0	0		0	0	0
Bradi1g00217		8	11	9		14	8	5		8	10	11		15	23	15		16	14	20		11	14	15
Bradi1g00219		48	39	61		41	59	64		70	76	80		83	74	59		80	81	71		83	84	69
Bradi1g00222		9.24	9	6		7	8.25	5.99		4.21	7	8.28		6	17	19.24		24	16	17.47		18	8	5.14
Bradi1g00234		1	0	3		3	1	2		1	3	0		0	1	2		1	0	3		3	3	1
Bradi1g00247		111	96	88		192	152	167		146	160	134		59	73	91		70	71	83		60	73	67
Bradi1g00253		0	1	2		2	2	1		4	1	1		6	6	3		15	13	11		9	4	5
Bradi1g00260		170	139	139		167	195	163		162	161	170.83		234	248	268		343	372	388.84		402.88	291	358.7
Bradi1g00266		43	52	43		54	57.91	51.43		56	46	57		60	73	74		111	111	106		91	109	77
Bradi1g00272		1	0	0		0	0	0		0	0	0		0	0	0		0	0	0		0	0	0
Bradi1g00278		0	2	0		3	1	2		1	2	1		0	2	0		0	0	0		0	0	1
Bradi1g00284		22	15	26		34	41	31		34	41	44		42	35	44		46	86	70		112	73	109
Bradi1g00287		2	2	2		1	2	4		1	1	0		1	0	1		4	1	4		1	2	1
Bradi1g00291		10	10	10		14	9	8		17	22	16		17	20	17		15	9	16		12	7	5
Bradi1g00300		0	0	0		0	0	0		0	0	0		0	0	0		0	0	0		0	0	0
Bradi1g00322		0	0	0		0	0	0		0	0	0		0	0	0		0	0	0		0	0	0
Bradi1g00330		9	18	19		8	8	8		12	6	9		10	9	7		12	1	8		2	11	8
Bradi1g00332		0	1	0		0	0	1		1	0	1		0	0	0		2	1	0		1	0	0
Bradi1g00335		0	0	0		0	0	0		0	1	0		0	0	0		0	1	0		1	0	0
Bradi1g00341		111	116	91		115	103	85		83	73	79		92	60	54		149	160	128		107	159	125
Bradi1g00345		7	21	17		28	15	22		17	22	18		9	14	6		20	16	10		13	14	7
Bradi1g00350		0	0	0		0	2	0		0	0	0		0	0	0		0	1	0		0	0	0
Bradi1g00360		0	0	0		0	0	0		0	2	0		0	0	0		0	0	0		0	0	0
Bradi1g00361		2	5	7		8	9	2		6	5	4		8	7	14		7	8	6		6	9	3
Bradi1g00362		22	31	29		14	24	10		21	16	27		30	28	46		34	39	28		20	24	9
Bradi1g00364		19	22	22		16	24	11		24	20	19		18	14	34		27	17	21		25	40	21
Bradi1g00365		0	1	0		0	0	1		1	0	1		2	4	4		9	2	2		1	3	1
Bradi1g00366		2	0	0		1	3	1		0	0	1		0	1	0		0	3	2		10	0	0
Bradi1g00368		0	0	0		0	0	0		0	0	4		0	0	0		0	0	0		2	0	1
Bradi1g00370		311.87	245	369.61		319.61	347.44	292.39		392.55	395	435.96		395.2	360.66	381.77		360.75	522.74	362.81		864.64	964.82	889.94
Bradi1g00381		0	0	0		0	0	0		0	0	0		0	0	0		0	0	0		1.42	0	0
Bradi1g00385		0	0	0		0	0	0		0	0	0		0	0	0		0	0	0		0	0	0
Bradi1g00390		0	0	0		0	0	0		0	0	0		0	0	0		0	0	0		0	0	0
Bradi1g00400		0	0	0		0	0	0		0	0	0		0	0	0		0	0	0		0	0	0
Bradi1g00405		0	0	0		0	0	0		0	0	0		0	0	0		0	0	0		0	0	0
Bradi1g00410		217	229	324		353	326	351		260	218	369		313	382	354		265	454	326		354	252	293
Bradi1g00412		0	0	0		0	0	0		0	0	0		0	0	0		0	0	0		0	0	0
Bradi1g00413		0	0	0		0	0	0		0	0	0		0	0	0		0	0	0		0	0	0
Bradi1g00415		0	0	0		0	0	0		1	0	0		0	0	0		0	0	0		0	0	0
Bradi1g00417		169.22	172.17	171.2		273.86	254.74	212.11		274.15	321.33	267.79		350.27	251.61	303.61		294.07	463.4	337.69		316.87	310.88	344.6
Bradi1g00427		66.96	89.04	66.32		104.88	94.42	104.78		108.86	132.04	116.53		157.66	130.84	143.91		137.31	225.78	178.87		176.18	178.73	206.21
Bradi1g00438		0	0	0		0	0	0		0	1	0		0	0	0		0	0	0		0	0	0
Bradi1g00450		767.3	829.02	883.12		1031.23	957.05	1061.15		1409.48	1395.51	1463.09		1135.99	1240.18	1254.82		1077.65	1262.87	1087.03		1029.31	851.11	1003.35
Bradi1g00455		5	0	0		0	0	0		0	1	0		0	0	1		0	0	2		0	0	0
Bradi1g00460		241	231	252		295	334	302		363	362	352		427	425	508		408	458	413		565	455	531
Bradi1g00470		1996.21	1912.9	1879.25		1895.85	1766.9	1861.54		1849.08	1947.38	1938.27		1892.64	1928.59	1942.96		2330.41	2292.3	2391.64		2031.88	2352.02	2031.87
Bradi1g00480		468.79	430.1	485.75		727.15	776.1	678.46		656.92	731.62	701.73		710.36	657.41	716.04		659.59	1026.7	863.36		1410.12	868.98	1442.13
Bradi1g00482		3	2	0		4	3	2		3	4	2		4	3	1		1	13	8		5	8	6
Bradi1g00485		40	46	48		33	59	52		65	52	41		57	54	66		37	37	46		61	28	40
Bradi1g00491		9	6	8		13	11	10		23	11	14		25	26	22		30	61	25		41	40	45
Bradi1g00497		1055	962	964		947	991	1016		951	1029	998		1247	1086	1233		1663	1834	1635		1204	1160	1154
Bradi1g00510		289	267	258		341	301	381		332	337	370		397	425	429		447	467	525		515	413	447
Bradi1g00517		478	449	443		548	501	561		549	617	571		848	805	897		1035	1392	1174		1259	987	1282
Bradi1g00530		244	222	258		264	309	299		277	266	298		272	252	287		352	386	407		559	485	583
Bradi1g00535		0	0	0		0	0	0		0	0	0		0	0	0		0	0	0		0	0	0
Bradi1g00540		117	120	130		140	153	129		101	92	137		132	129	126		83	83	89		118	125	113
Bradi1g00552		29	32	20		30	31	39		20	35	29		13	18	9		8	5	9		18	18	23
Bradi1g00560		981	1150	975.06		1182	1230.19	1156		886	1017	780.43		393	502.66	461		239	344.47	224		535.55	378	499.42
Bradi1g00563		101.15	116.89	126.74		76.56	35.58	49.01		54.67	29.61	55.97		25.8	29.97	45.54		42.12	4.81	20.77		17.65	14.36	19.28
Bradi1g00567		864.85	714.11	839.2		859.44	881.23	855.99		839.33	925.39	926.6		912.2	913.37	927.46		1068.88	1224.72	1134.23		1129.81	1103.64	1143.3
Bradi1g00580		712	678	762		866	852	881		896	995	891		1011	1103	1055		980	1328	1086		1472	1176	1442
Bradi1g00587		145	125	141		242	274	287		197	193	215		215	209	211		197	218	265		267	249	238
Bradi1g00600		5	0	1		0	0	0		0	0	0		1	0	0		0	0	0		0	0	0
Bradi1g00607		1	2	3		6	1	2		3	1	3		0	1	1		0	1	0		0	1	2
Bradi1g00620		262	302	159		205	224	254		221	158	143		209	184	240		224	273	251		335	372	380
Bradi1g00625		8	4	13		2	8	3		6	3	9		9	9	10		6	7	14		11	12	9
Bradi1g00630		4	3	2		1	3	3		3	4	5		5	8	1		4	5	6		6	4	5
Bradi1g00642		10	5	4		5	12	5		7	7	3		3	7	5		3	2	8		10	9	11
Bradi1g00654		0	0	0		0	0	0		0	0	0		0	0	0		0	0	0		0	0	0
Bradi1g00666		834	638	839		975	1303	810		408	254	191		504	417	539		120	117	77		35	35	44
Bradi1g00672		0	0	0		0	0	1		0	0	0		0	1	0		0	0	0		0	0	0
Bradi1g00678		416	431	451		730	718	631		565	672	458		437	485	436		390	412	383		318	288	359
Bradi1g00690		414	408	526		427	556	465		489	503	514		360	301	277		304	297	294		493	456	494
Bradi1g00700		9253	9136	10352		18014	19289	19077		21310	24121	20660		19933	20944	19910		14635	16079	16142		9941	8997	9572
Bradi1g00710		59	124	83		80	96	89		156	85	70		148	154	142		117	121	69		89	70	76
Bradi1g00720		173	199	188		166	169	205		233	193	194		201	209	213		250	233	223		204	175	201
Bradi1g00730		1045.37	830.63	1343.8		829.2	1196.82	870.56		1005.15	914.37	1266.89		1111.66	1012.83	1081.46		1177.37	1305.53	1163.77		1570.88	1294.5	1593.04
Bradi1g00740		441.63	482.37	397.2		262.8	242.18	305.44		242.85	182.63	209.11		341.34	333.17	309.54		595.63	527.47	506.23		502.12	553.5	495.96
Bradi1g00750		1192.38	979.7	977.02		966.76	1078.06	903.96		802.43	701.61	763.09		888	922.3	940.2		814.75	971.74	890.9		2224.2	1981.02	2410.72
Bradi1g00760		370.62	330.3	444.98		304.24	377.94	459.04		352.57	301.39	365.91		246	269.7	294.8		218.25	286.26	255.1		492.8	334.98	379.28
Bradi1g00770		0	0	0		0	0	0		0	0	0		0	0	0		0	0	0		0	0	0
Bradi1g00780		21	14	19		15	20	24		42	34	35		31	23	26		41	48	54		68	53	78
Bradi1g00785		1	0	0		2	4	2		4	2	3		1	5	4		6	5	4		1	3	2
Bradi1g00790		41	36	26		49	29	47		20	11	10		5	2	4		0	0	0		4	5	11
Bradi1g00800		0	0	0		0	2	0		0	0	0		0	0	0		0	0	0		0	0	0
Bradi1g00807		1	0	0		0	0	0		0	0	0		0	0	0		0	0	0		0	0	0
Bradi1g00820		551	662	600		655	721	666		762	714	763		962	932	876		938	1145	1038		826	822	816
Bradi1g00830		309	202	222		293	320	280		255	227	244		116	118	132		72	81	75		419	419	487
Bradi1g00840		138	117	89		82	62	66		80	60	38		76	62	66		71	99	78		132	133	125
Bradi1g00847		508	471	535		482	519	601		498	500	582		797	920	813		1210	1298	1127		910	809	909
Bradi1g00860		657	659	636		713	709	703		743	691	741		1029	1054	993		1362	1233	1280		964	924	1046
Bradi1g00867		0	0	1		0	1	0		0	0	1		0	0	0		0	0	0		0	0	0
Bradi1g00880		55	93	79		57	44	60		49	55	49		57	56	35		67	82	93		85	100	89
Bradi1g00887		1163	1064	1327		1291	1273	1399		1362	1443	1568		1667	1493	1619		2003	2151	1996		2481	1984	2374
Bradi1g00900		1066	1129	696		628	372	352		383	370	298		640	622	651		915	891	675		662	640	540
Bradi1g00910		564	532	491		342	373	391		536	519	577		942	835	832		1518	1181	1289		610	785	653
Bradi1g00920		7	16	8		6	5	13		11	6	7		5	9	5		4	4	5		7	6	5
Bradi1g00931		43	64	51		45	34	56		47	33	45		46	44	41		23	38	26		32	21	31
Bradi1g00940		5813	5535	5383		5815	5469	5724		3930	4555	4430		1395	1184	1419		460	348	353		3964	4197	3969
Bradi1g00950		0	0	2		2	0	3		3	0	1		7	1	8		2	7	0		35	23	25
Bradi1g00960		145	148	180		203	186	147		155	155	152		276	252	253		255	318	330		395	264	345
Bradi1g00970		124	117	125		86	60	81		85	62	58		127	116	138		155	162	167		26	25	21
Bradi1g00980		2272	2059	1666		2033	1776	2177		2365	2091	1795		6757	5743	6578		11908	14858	13356		2878	2493.99	2557
Bradi1g00990		779	800	760		827	793	800		872	1062	993		1071	1073	1190		1168	1387	1198		1134	925	1043
Bradi1g01000		186	137	209		145	161	161		179	153	205		247	190	224		314	237	274		289	335	301
Bradi1g01007		81	84	86		99	74	83		84	67	84		100	82	110		131	153	124		153	117	192
Bradi1g01014		1181	1187	1232		984	1023	1116		1091	1038	1192		1291	1181	1127		1452	1078	1257		1061	1016	829
Bradi1g01021		129	79	118		118	293	85		201	126	300		129	54	122		130	211	161		1008	1021	1393
Bradi1g01030		0	0	0		0	0	0		0	0	0		0	0	0		0	0	0		0	0	0
Bradi1g01040		1	1	0		0	4	2		3	0	2		0	2	0		1	1	1		0	3	2
Bradi1g01047		1678	1580	1961		1698	1783	1799		2033	2001	2117		2963	2429	2841		3357	3176	2964		1923	2200	1834
Bradi1g01058		2	0	6		2	1	1		0	1	1		1	1	0		3	2	0		2	12	4
Bradi1g01070		80	91	99		90	93	106		106	83	115		132	110	146		168	184	136		172	144	130
Bradi1g01075		0	0	0		0	0	0		0	0	0		0	0	0		0	0	0		0	0	0
Bradi1g01080		989	1017	1015		846	1069	996		1655	1371	1329		1844	1814	1579		1567	1449	1530		1706	1900	1855
Bradi1g01090		1667	1562	1705		2119	2213	2261		2645	3114	2917		1970	1927	2045		1114	1308	1197		1332	963	1203
Bradi1g01100		258	246	275		229	258	286		305	226	343		288	298	294		347	314	326		293	307	302
Bradi1g01110		215	261	197		232	248	260		205	192	235		262	245	241		498	466	391		387	337	343
Bradi1g01120		29	12	25		17	12	32		22	25	11		31	41	40		61	54	68		50	34	37
Bradi1g01130		911	893	821		976	940	955		967	1005	1167		1387	1368	1400		1806	2109.22	1850		1355	1205	1304
Bradi1g01140		109	135	158		126	157	131		139	107	174		192	173	192		277	273	259		304	254	307
Bradi1g01150		0	0	0		0	0	0		0	0	0		0	0	0		0	0	0		1	0	0
Bradi1g01160		3	0	0		0	0	0		0	0	0		0	0	0		1	0	0		1	0	0
Bradi1g01170		454	462	498		454	442	492		526	547	589		714	777	751		755	813	743		764	679	850
Bradi1g01172		0	0	0		0	0	0		1	0	1		1	1	0		1.01	0	1.01		0	1.01	0
Bradi1g01174		0	1	0		1	0	1		1	0	0		1	3	0		0	0	0		0	0	2
Bradi1g01176		2	0	0		0	0	0		0	0	2		2	1	0		0	0	0		0	0	0
Bradi1g01178		0	2	1		0	0	0		0	1	0		1	1	2		3	1	1		0	0	0
Bradi1g01180		0	0	0		0	1	0		0	0	1		2	0	0		0	0	0		0	1	1
Bradi1g01190		2	3	6		2	6	4		5	7	4		17	22	9		2	6	2		7	7	12
Bradi1g01200		82	109	99		111	123	105		110	114	117		166	156	148		219	260	184		210	183	221
Bradi1g01210		45.92	44.74	40.32		35.7	34.42	43.86		70.02	51.46	60		85.85	70.87	77.58		78.98	108.47	98.74		100.96	78.73	74.7
Bradi1g01220		82.08	60.26	81.68		50.3	46.58	63.14		40.98	56.54	68		116.15	130.13	140.42		167.02	183.53	194.26		116.04	114.27	120.3
Bradi1g01227		803	654	984		722	809	851		810	697	931		938	1021	1050		1137	1077	1091		1130	1151	1216
Bradi1g01240		3	3	3		2	6	6		8	5	2		6	4	0		4	2	4		5	6	6
Bradi1g01250		221	180	239		200	238	183		212	233	215		429	457	376		636	854	664		856	778	863
Bradi1g01257		269	312	347		345	441	466		502	524	506		664	650	728		662	928	726		724	541	679
Bradi1g01270		32	25	30		26	33	37		43	29	43		52	48	43		103	83	75		72	105	96
Bradi1g01280		17	14	21		25	22	21		27	32	26		43	34	30		37	74	59		57	45	66
Bradi1g01290		913	838	1031		789	810	783		910	921	995		1516	1609	1543		1329	1211	1294		1221	1161	1181
Bradi1g01300		8	17	11		13	22	12		27	22	27		53	45	42		27	28	22		39	36	29
Bradi1g01305		0	0	0		0	0	0		0	0	0		0	0	0		0	0	0		0	0	0
Bradi1g01310		730	819	943		1050	1157	1156		1316	1473	1279		195	217	210		39	48	41		60	50	43
Bradi1g01320		259	271	316		174	236	195		246	171	237		320	300	289		402	355	363		320	402	306
Bradi1g01330		139	139	104		102	90	110		100	88	87		111	97	120		116	130	114		136	133	116
Bradi1g01332		3	3	0		2	1	1		0	2	2		0	1	2		0	0	0		2	1	0
Bradi1g01334		0	0	0		0	0	0		0	0	0		0	0	0		0	0	0		0	0	0
Bradi1g01336		2	0	0		10	3	4		1	3	8		5	5	3		3	2	6		5	3	1
Bradi1g01338		0	0	0		0	2	0		0	0	0		0	0	0		0	0	0		0	0	0
Bradi1g01342		1	0	2		1	1	0		0	1	0		0	0	0		0	0	0		0	0	0
Bradi1g01344		0	1	0		0	0	1		0	0	0		0	0	0		0	0	0		0	0	0
Bradi1g01350		0	0	0		0	0	0		0	0	0		0	0	0		0	0.78	0		0	0	0
Bradi1g01357		121	155	137		154	138	158		181	184	168		197	171	192		185	162	151		142	201	204
Bradi1g01363		162	136	96		133	157	106		104	91	123		119	139	124		156	164	170		307	337	349
Bradi1g01368		1	1	3		6	0	6		4	0	4		5	1	5		1	5	3		6	9	7
Bradi1g01374		1	0	1		6	5	3		5	3	14		7	2	7		3	6	2		4	3	6
Bradi1g01380		72.35	64.78	88.49		116.1	100.64	107.24		126.5	96.72	171.62		107.49	186.69	160.79		85.96	120.38	107.55		179.13	93.06	137.56
Bradi1g01387		62	56	55		80	76	71		64	109	81		67	76	84		100	99	87		113	92	125
Bradi1g01397		3	3	1		4	9	5		3	5	2		4	8	14		4	8	8		20	14	20
Bradi1g01407		52.65	45.22	58.51		56.9	68.36	84.76		64.5	67.28	90.38		82.51	135.31	90.21		78.04	114.62	108.45		197.87	138.94	181.44
Bradi1g01420		308	277	255		365	350	309		303	270	279		267	238	232		188	301	252		505	435	522
Bradi1g01432		32	21	39		47	61	52		46	71	74		60	89	51		67	123	80		191	129	184
Bradi1g01442		23	19	22		31	29	38		43	33	27		31	58	48		40	55	50		54	57	37
Bradi1g01450		1	0	0		0	1	0		1	0	0		0	0	0		0	1	0		0	0	1
Bradi1g01455		1	0	0		1	0	0		1	0	1		0	0	0		1	2	0		0	0	0
Bradi1g01460		260	233	271		276	211	229		232	281	283		764	773	688		1387	1502	1438		408	398	393
Bradi1g01470		1	1	4		6	2	5		4	4	6		8	4	8		15	14	21		11	15	9
Bradi1g01480		2507	1823	2640		1988	2410	2003		1757	1601	1903		1207	1130	1228		1536	1528	1525		3380	3919	3322
Bradi1g01487		219	185	195		244	238	237		242	256	228		271	296	247		311	447	360		286	262	290
Bradi1g01500		632	517	729		585	637	685		659	647	838		1382	1152	1208		1479	1270	1393		861	705	716
Bradi1g01507		754	688	707		645	727	646		632	517	656		691	759	671		691	759	622		782	806	827
Bradi1g01520		3	0	2		6	4	6		1	4	4		3	5	3		8	1	3		4	5	7
Bradi1g01530		884	806	991		797	860	891		960	884	1045		1209	1188	1127		1185	1139	1097		1188	1316	1216
Bradi1g01541		0	0	0		0	0	0		0	0	0		0	0	0		0	0	0		0	0	0
Bradi1g01551		0	0	0		0	0	1		0	0	0		0	0	0		0	0	0		0	0	0
Bradi1g01560		2044	1966	2020		1957	1964	2139		1997	1892	2237		1816	1994	1888		1866	1828	1760		2045	1942	2039
Bradi1g01570		3056	2536	3115		2640	2838	2875		2794	2513	2949		2464	2606	2682		2889	2342	2491		2688	3053	2557
Bradi1g01580		1281	1148	1568		1182	1539	1371		1509	1394	1794		1451	1383	1432		1926	1826	1730		1799	1737	1718
Bradi1g01590		0	0	0		0	0	0		0	0	0		0	0	0		1	0	0		0	0	0
Bradi1g01593		0	0	0		0	0	0		0	0	0		0	0	0		0	0	0		0	0	0
Bradi1g01594		0	0	0		0	0	0		0	0	0		0	0	0		0	0	0		0	0	0
Bradi1g01596		0	2	3		2	0	0		0	1	0		3	0	0		0	2	1		4	9	1
Bradi1g01598		0	0	0		0	0	0		0	0	0		0	0	0		0	0	0		0	0	0
Bradi1g01600		687	683	846		608	740	711		740	645	878		805	735	817		792	743	810		856	898	785
Bradi1g01610		109	88	170		143	185	182		157	144	219		183	262	167		112	72	101		23	30	40
Bradi1g01620		331	312	305		277	390	307		325	278	345		472	456	466		552	510	572		797	855	747
Bradi1g01630		244	241	216		172	175	180		175	162	176		99	99	101		38	55	42		199	170	146
Bradi1g01640		7	3	5		7	8	2		8	6	2		4	4	4		6	7	4		9	5	12
Bradi1g01645		46	41	49		36	33	40		48	47	35		90	52	63		59	67	63		60	93	68
Bradi1g01650		0	0	0		0	0	0		0	0	0		0	0	0		0	0	0		0	0	0
Bradi1g01656		0	0	0		0	0	0		0	0	0		0	0	0		0	0	0		0	0	0
Bradi1g01660		926	888	1074		1023	1204	1109		1159	1140	1189		1719	1754	1570		3154	3189	3365		2637	2404	2403
Bradi1g01670		29	18	25		24	21	25		17	22	24		31	19	26		21	22	23		28	21	23
Bradi1g01680		0	0	0		2	1	0		1	0	0		0	0	0		0	0	0		0	0	0
Bradi1g01683		0	0	0		0	0	0		0	0	0		0	0	0		0	0	0		0	0	0
Bradi1g01686		7	8	9		8	12	7		13	9	3		15	10	17		13	21	19		8	17	11
Bradi1g01691		6	3	5		6	6	2		7	5	8		5	7	6		6	7	7		4	7	2
Bradi1g01692		36	58	72		43	41	26.82		42	32	50		33	43	42		56	34	40		54	54	55.35
Bradi1g01693		41	49	54		48	78	89		80	76	84		60	63	67		60	102	86		148	120	140
Bradi1g01695		0	0	0		0	0	0		0	0	0		0	0	0		0	0	0		0	0	0
Bradi1g01700		6	1	6		8	4	6		4	7	10		15	4	10		37	28	45		122	127	111
Bradi1g01710		445	414	437		394	431	439		423	443	542		503	519	511		510	451	520		434	425	430
Bradi1g01715		0	0	2		0	0	1		1	2	1		1	1	0		0	0	0		0	3	1
Bradi1g01720		224	246	295		237	281	267		244	191	228		241	250	287		344	353	310		390	355	388
Bradi1g01730		390	428	452		658	606	690		630	698	698		659	584	617		596	720	640		510	453	497
Bradi1g01740		595	603	728		704	651	732		982	1122	1090		1026	997	1002		677	903	734		726	590	711
Bradi1g01750		1747	2160	2249		4131	3837	3374		3585	3585	3037		1298	1381	1412		1062	1187	1249		762	738	760
Bradi1g01760		20	14	39		14	25	33		24	21	33		60	46	73		75	68	87		87	59	64
Bradi1g01770		566.52	488.32	516.62		483.03	482.83	486.61		397.84	412.72	432.64		432.22	379.38	395.57		558.83	492.54	451.04		639.13	755.3	689.22
Bradi1g01780		153.48	133.68	179.38		172.97	153.17	174.39		263.16	196.28	188.36		307.78	330.62	365.43		603.17	553.46	563.96		246.87	274.7	217.78
Bradi1g01790		366	328	385		664	503	533		357	343	317		334	349	364		456	483	430		164	184	141
Bradi1g01795		0	0	0		0	0	0		0	0	0		0	0	0		0	0	0		0	0	0
Bradi1g01800		2158	1614	2421		2089	2302	2207		1413	1555	1805		804	834	904		1319	1333	1256		2099	1951	2003
Bradi1g01801		0	0	0		0	0	0		0	0	0		0	0	0		0	0	0		0	0	0
Bradi1g01802		110	110	107		120	123	124		123	101	118		125	152	141		120	126	130		192	214	196
Bradi1g01805		0	0	0		0	0	0		0	0	0		0	0	0		0	0	0		0	0	0
Bradi1g01807		0	0	0		0	0	0		0	0	1		0	0	1		0	1	0		0	0	0
Bradi1g01810		110	49	107		94	130	76		113	92	146		108	89	97		150	187	154		302	252	298
Bradi1g01820		137	210	155		136	161	173		178	149	174		106	105	116		90	76	108		237	232	221
Bradi1g01830		974	770	913		760	836	775		944	912	1012		733	820	815		931	769	831		753	788	741
Bradi1g01835		0	1	0		0	2	0		0	3	0		0	0	1		0	0	0		1	0	3
Bradi1g01840		3239	2968	3501		3522	3228	3475		3878	3664	3758		3719	3915	3928		3628	3694	3373		1830	1691	1856
Bradi1g01847		649	564	665		695	753	695		680	639	799		816	917	866		1095	1076	1147		1367	1346	1385
Bradi1g01860		16	14	15		19	20	19		23	17	32		8	13	27		16	15	17		10	16	9
Bradi1g01870		1893	2145	1480		2245	2032	2088		4980	6464	3663		2410	2168	2221		1098	1191	1155		953	924	984
Bradi1g01873		0	0	0		0	0	0		0	0	0		0	0	0		0	0	0		0	0	0
Bradi1g01876		14	23	17		8	9	12		12	19	14		13	15	8		13	10	9		7	8	9
Bradi1g01880		2732	2960	2572		3140	3093	3108		2397	2499	2248		1411	1250	1381		527	511	587		2170	2097	2166
Bradi1g01890		31	35	20		19	20	16		25	24	32		18	31	20		25	28	24		22	16	17
Bradi1g01900		210	222	200		219	176	182		231	200	206		193	237	199		421	415	316		493	465	409
Bradi1g01910		0	0	0		0	0	0		0	0	0		0	0	0		0	0	0		0	0	0
Bradi1g01920		3.02	3	6		4.04	1.01	3		3.05	0	3		2.05	1	3.04		5.07	2.01	1.01		15.44	8.24	15.33
Bradi1g01930		329.98	341	400		491.96	544.99	489		528.95	540	578		380.95	387	329.96		429.93	522.99	425.99		491.56	475.76	533.67
Bradi1g01936		928	964	984		1451	1328	1346		1033	1013	1089		872	844	839		951	1113	956		744	676	723
Bradi1g01942		13	21	9		10	15	23		11	15	26		23	28	23		21	35	26		21	18	20
Bradi1g01946		0	0	1		0	0	0		0	0	0		0	0	0		0	0	0		0	0	0
Bradi1g01948		149.49	103.17	168.19		113	98.25	109.22		171.32	144	178.24		168.59	234.96	203.1		228.01	167.53	207.29		130.59	147.81	120.29
Bradi1g01950		1.18	1	3		5	3	5		2	2.26	1.13		5	2	6		1	2	12.43		17.56	7.67	15.43
Bradi1g01958		0	2	3		0	0	0		1	0.74	0		0	0	0		0	3	3.57		2	0	3
Bradi1g01965		6	7	4		2	4	3		3	1	3		16	6	8		8	19	15		6	10	21
Bradi1g01970		18	24.88	20.65		44.76	52.46	30		36.65	45.04	36.72		29.43	31.87	21.83		36.43	41.12	29.3		90.34	88.37	115.07
Bradi1g01980		120.51	126.83	145.81		145	150.75	162.78		126.68	123	179.76		159.41	177.04	156.9		210.99	257.47	220.71		204.41	229.19	182.71
Bradi1g01985		39	15	51		106	46	65		57	59	81		8	17	15		4	2	2		10	5	4
Bradi1g01990		262	177	260		288	282	280		268	268	329		307	291	345		325	435	390		412	356	420
Bradi1g02000		495	497	528		580	606	647		599	707	716		616	688	675		699	793	730		890	758	876
Bradi1g02010		5	4	9		5	9	3		4	5	5		1	2	6		0	0	2		5	0	0
Bradi1g02020		1535	1818	1805		1834	1557	1727		1722	1774	1988		2170	2009	2219		2669	2806	2725		2935	2512	2631
Bradi1g02030		3075	2069	2723		2047	2352	2349		1906	1848	1988		1003	780	1020		346	267	320		2877	3642	3142
Bradi1g02040		0	0	0		1	1	1		0	0	5		0	0	1		3	3	1		4	4	2
Bradi1g02050		0	0	3		2	2	3		1	1	2		2	4	4		1	3	4		4	0	3
Bradi1g02056		108	135	159		146	102	146		128	143	165		95	92	101		229	193	184		107	122	104
Bradi1g02060		2666	2424	2292		2616	2853	2816		3545	4119	3444		3736	3832	3877		3356	4206	3622		3493	3131	3288
Bradi1g02071		1	3	0		0	0	2		4	1	4		1	3	2		0	2	2		0	0	2
Bradi1g02080		514	493	480		344	359	311		284	273	212		367	349	357		369	352	321		537	620	578
Bradi1g02090		1186	1170	1213		1378	1304	1411		1436	1422	1481		1484	1497	1519		1399	1679	1516		1525	1528	1513
Bradi1g02100		1006	898	985		891	855	886		907	832	853		1444	1298	1346		1889	1876	1719		923	931	920
Bradi1g02103		0	0	0		0	0	0		0	0	0		0	0	0		0	0	0		0	0	0
Bradi1g02107		3	2	1		2	1	2		3	2	4		2	2	1		12	15	12		6	5	2
Bradi1g02117		141	122	148		137	164	159		188	207	220		209	226	200		208	223	236		233	185	254
Bradi1g02130		7	6	7		3	7	15		7	4	3		14	8	8		17	15	16		14	8	15
Bradi1g02137		14	17	13		34	44	29		50	37	39		45	46	37		55	59	48		57	36	35
Bradi1g02145		61	50	52		74	68	70		118	122	115		142	132	154		122	206	152		176	168	155
Bradi1g02150		584	488	460		620	642	598		466	508	480		176	151	192		49	41	42		659	582	638
Bradi1g02160		566	577	558		575	541	501		483	431	505		695	901	798		848	902	922		1049	1004	925
Bradi1g02165		0	0	0		0	0	0		0	0	0		0	1	0		0	0	0		0	0	0
Bradi1g02170		767	698	841		562	739	671		671	646	898		635	642	624		862	796	785		788	858	771
Bradi1g02180		297	262	342		342	469	400		378	428	451		499	487	537		458	581	479		518	393	478
Bradi1g02185		1	0	1		1	4	1		3	1	1		2	4	0		2	2	5		0	2	0
Bradi1g02187		0	0	0		0	0	0		0	0	0		0	0	1		0	0	0		0	0	0
Bradi1g02190		0	0	0		0	0	0		0	0	0		0	0	0		0	0	0		0	0	0
Bradi1g02200		0	0	0		2	0	0		0	0	1		0	0	0		0	1	0		0	1	0
Bradi1g02205		0	2	7		15	1	0		9	0	1		0	6	1		0	2	0		2	4	4
Bradi1g02210		107	120	98		292	299	258		168	191	202		98	104	101		87	110	97		79	85	82
Bradi1g02220		2588	2459	3064		2011	2203	2127		2505	2197	2462		2704	2807	2490		3205	2462	2451		2205	2209	2091
Bradi1g02230		14	22	18		27	35	31		22	26	26		44	38	44		40	56	53		42	43	51
Bradi1g02240		1	0	1		0	1	1		2	1	0		1	1	2		2	4	2		2	0	4
Bradi1g02247		184	187	196		170	209	203		283	276	279		282	275	288		327	374	289		238	215	212
Bradi1g02253		2	3	3		3	1	4		4	2	0		2	2	0		0	1	3		1	0	2
Bradi1g02260		354	354	383		302	304	292		324	327	330		373	356	383		459	516	376		405	434	385
Bradi1g02270		6488.44	5819.33	5460.63		6324.19	6277.39	6619.61		7009.67	7087.9	6867.77		13409.7	12426.7	13499.5		16030.2	18531.3	16728.2		9884.94	9857.89	9488.92
Bradi1g02273		111.56	101.67	80.37		166.81	106.61	113.39		80.33	68.1	55.23		84.29	77.29	108.51		125.76	120.68	140.78		51.06	56.11	71.08
Bradi1g02280		720	730	753		1280	1279	1280		1160	1329	1402		926	1007	1003		1201	1447	1309		1592	1352	1511
Bradi1g02290		7	7	13		7	16	11		14	8	15		18	11	13		29	38	22		32	19	23
Bradi1g02300		3	10	11		13	13	10		11	9	7		5	14	5		6	4	12		23	28	15
Bradi1g02303		33	51	69		47	38	41		37	30	50		54	42	58		87	51	63		57	72	59
Bradi1g02304		1	0	0		0	0	1		0	0	0		0	0	0		0	3	0		0	3	1
Bradi1g02306		37	29	35		32	33	33		55	60	43		67	66	87		73	78	67		74	66	68
Bradi1g02310		617.45	576.66	645.7		591.9	659.5	691.77		596.49	603.78	630.67		666.94	746.87	665.28		742.53	842.21	781.58		707.22	666.95	701.22
Bradi1g02327		14.87	10.31	29.17		12.76	13.88	11.76		23.99	13.54	29.82		31.17	43.53	31.49		39.46	27.82	30.02		24.66	20.02	19.58
Bradi1g02338		0	0	1		0	0	0		1	0	1		0	0	1		0	2	0		0	1	0
Bradi1g02350		222.85	280.75	302.12		306.29	296.76	305.4		378.16	363.4	345.01		450.53	466.83	422.43		434.38	475.12	453.87		524.4	441.69	414.4
Bradi1g02361		0	0	0		0	0	0		0	0	0		0	0	0		0	0	0		0	0	0
Bradi1g02370		114	88	83		97	101	113		124	80	83		151	97	124		211	292	269		202	261	224
Bradi1g02380		463	406	419		487	494	465		431	439	516		538	484	515		720	850	719		827	825	886
Bradi1g02390		388	423	419		567	552	588		492	529	494		354	366	325		475	509	470		312	294	306
Bradi1g02400		1314	1135	1165		1003	1161	1145		761	794	724		676	626	646		626	568	578		1014	1017	994
Bradi1g02410		3	9	3		5	8	1		7	1	5		3	2	4		4	10	2		5	3	2
Bradi1g02420		418	459	335		387	389	476		1278	1533	1127		2126	1994	1870		1271	1274	1226		483	562	588
Bradi1g02430		0	0	1		0	0	0		0	0	3		1	2	3		0	1	0		0	2	0
Bradi1g02440		1151	1150	1203		3435	3232	2179		1993	2280	2011		1471	1405	1510		1127	2283	1718		1184	685	1010
Bradi1g02450		691	708	743		592	630	586		397	402	359		440	429	440		398	421	383		1167	1231	1344
Bradi1g02460		32	27	52		21	34	27		31	11	25		35	35	47		48	37	49		46	57	51
Bradi1g02465		0	1	0		0	0	0		2	0	0		0	1	0		2	1	1		0	0	0
Bradi1g02470		1	2	0		1	0	0		1	2	0		0	0	0		0	0	0		2	3	1
Bradi1g02475		0	0	0		0	0	0		0	0	0		0	0	0		0	0	0		0	0	1
Bradi1g02480		447.59	435.97	516.55		440.72	420.38	493.19		521.16	530.39	477.55		590.68	613.84	611.93		906.38	945.59	733.17		790.03	947.42	944.71
Bradi1g02483		6	9	3		14	22	18		13	23	12		24	21	36		12	51	45		54	27	53
Bradi1g02487		0	0	0		0	0	0		0	0	0		0	0	0		0	0	0		0	0	0
Bradi1g02490		1065	1087	1087		1194	1200	1254		1124	1146	1179		1322	1244	1362		1599	1910	1654		1823	1610	1762
Bradi1g02497		0	0	0		0	0	0		0	0	0		0	0	0		0	0	0		0	0	0
Bradi1g02505		47	35	47		40	38	46		49	44	67		79	73	67		107	106	102		132	128	132
Bradi1g02510		6187	6407	7139		7766	7927	7457		6003	6957	5919		3284	3553	3329		3611	4287	3660		5009	4689	4996
Bradi1g02517		348.32	341.16	396		330.26	344.32	371.24		245.22	299	291.51		362.59	336.43	340		573	539.56	543.09		567	619.65	565
Bradi1g02530		1.68	1.84	0		2.74	3.68	2.76		4.78	0	1.49		1.41	2.57	0		0	2.44	3.91		0	1.35	0
Bradi1g02535		24	21	12		72	56	52		59	71	51		54	62	53		37	63	72		81	61	75
Bradi1g02540		337	335	376		304	318	319		456	392	367		360	441	403		667	598	597		409	492	444
Bradi1g02550		2014	1960	1804		1649	1508	1573		807	772	669		315	278	367		123	115	127		1308	1713	1313
Bradi1g02560		507	427	459		827	889	857		688	631	638		659	560	597		591	544	609		383	466	429
Bradi1g02570		735	710	849		963	843	956		941	930	953		1749	1647	1706		2301	2267	2220		788	771	792
Bradi1g02575		0	4	1		2	3	3		2	3	5		4	1	1		4	1	4		1	0	0
Bradi1g02580		1256	1144	1290		1390	1275	1372		1564	1627	1658		1609	1634	1632		1237	1319	1285		1145	1099	1143
Bradi1g02590		1038	779	971		708	951	880		902	687	1034		1147	1094	1161		1403	1175	1181		1085	1143	1074
Bradi1g02597		1033	985	1111		1190	1230	1213		1474	1482	1497		2356	2428	2386		1583	1983	1709		1373	1144	1345
Bradi1g02610		474	443	535		464	457	504		518	522	502		735	832	731		867	852	783		655	654	725
Bradi1g02615		3	4	2		0	0	1		3	2	3		1	6	3		6	4	3		5	5	2
Bradi1g02621		352	295	427		363	429	316		374	302	425		351	396	366		651	702	616		767	689	765
Bradi1g02630		806	735	830		866	718	739		848	846	922		1096	1037	1135		2142	2151	1924		1457	1390	1399
Bradi1g02635		3153	3163	2783		3216	3255	3783		4261	3526	4058		4795	4921	5024		5674	4223	5113		6880	7625	6729
Bradi1g02637		0	0	0		0	0	0		0	0	0		0	0	0		0	0	0		0	0	2
Bradi1g02640		893	776	951.64		640	841	749		869	655	822		1063	863	979		1864	1473	1662		1148	1266	1145
Bradi1g02645		0	0	2		1	0	0		2	1	0		0	1	2		0	1	3		1	1	0
Bradi1g02650		788	744	917.36		514	692	606		762	529	762		763	805	801		1153	947	1011		781	932	772
Bradi1g02670		0	0	0		0	0	0		0	0	0		0	0	0		0	0	0		0	0	0
Bradi1g02680		490	487	349		815	839	850		645	821	576		742	732	889		377	587	523		949	606	837
Bradi1g02685		0	0	0		0	0	0		0	0	0		0	0	0		0	0	0		0	0	0
Bradi1g02690		40	29	33		28	34	26		21	28	28		82	60	66		80	58	59		60	64	68
Bradi1g02697		72	52	58		62	51	53		54	29	68		83	85	87		77	80	76		142	139	154
Bradi1g02710		331	300	486		454	362	440		498	459	619		477	474	481		312	280	344		279	219	273
Bradi1g02720		90	53	97		81	74	68		58	56	57		100	114	105		119	107	121		263	233	276
Bradi1g02730		62	101	95		109	81	134		138	160	160		365	356	357		552	563	616		110	105	117
Bradi1g02735		1	0	0		1	1	3		1	3	0		1	0	1		1	4	3		2	4	0
Bradi1g02740		479	390	414		410	531	460		440	486	603		576	566	557		614	629	620		613	587	612
Bradi1g02750		94	85	55		63	42	66		69	64	43		90	90	117		110	125	99		44	46	52
Bradi1g02755		0	0	0		0	0	0		0	0	0		0	0	0		0	0	0		0	0	0
Bradi1g02760		709	695	707		783	855	803		815	830	834		1073	1162	1074		1107	1493	1320		1415	1314	1587
Bradi1g02770		1755	1694	1681		2163	1901	2147		1606	2072	2009		1300	1073	1301		1253	1517	1515		2796	2036	2473
Bradi1g02780		97	96	110		128	106	116		116	89	130		199	209	207		238	259	252		200	221	202
Bradi1g02790		0	0	0		1	0	0		0	1	0		0	1	1		1	1	1		0	0	1
Bradi1g02800		375.74	338.98	420.2		520.24	536.38	541.87		764.52	840.34	778.71		1238.36	1212.89	1278.46		1573.91	1964.83	1699.93		934.28	763.09	1039.84
Bradi1g02805		72.26	102.02	81.8		45.76	45.62	63.13		117.48	55.66	64.29		160.64	126.11	137.54		134.09	154.17	134.07		66.72	80.91	62.16
Bradi1g02810		426	358	442		508	490	496		590	592	653		1480	1343	1417		2122	2460	2176		1761	1579	1610
Bradi1g02820		0	0	0		0	0	0		0	0	0		0	0	0		0	0	0		0	0	0
Bradi1g02830		13	8	6		4	6	3		15	9	9		14	9	19		16	8	17		20	10	16
Bradi1g02840		75	78	85		63	84	73		85	69	79		151	112	119		146	149	137		147	154	150
Bradi1g02850		64	50	61		40	45	42		41	52	47		72	67	68		110	100	94		88	94	96
Bradi1g02860		3	0	2		0	0	1		0	0	2		0	3	0		0	0	0		1	0	1
Bradi1g02870		0	0	0		0	0	0		1	0	0		1	0	0		0	0	0		2	0	1
Bradi1g02880		191	170	185		193	179	200		181	179	213		340	338	321		464	478	452		348	328	323
Bradi1g02890		40	50	56		41	59	54		79	40	51		109	81	116		115	125	122		167	124	162
Bradi1g02900		6	6	19		15	19	10		17	10	16		25	18	24		22	27	23		23	21	39
Bradi1g02910		66	40	68		48	48	69		60	74	61		115	125	129		114	141	110		163	150	148
Bradi1g02920		197	217	207		394	393	342		398	431	376		279	295	263		270	322	311		302	266	293
Bradi1g02930		608	599	661		481	512	593		614	547	649		691	667	657		721	613	643		486	461	436
Bradi1g02940		4769	4309	6036		5444	6146	4894		5371	4845	6055		18243	19877	19710		9207	9835	9393		6255	5097	5960
Bradi1g02950		585	505	661		420	478	489		457	441	537		596	549	457		988	786	772		705	757	699
Bradi1g02960		1923	1797	2045		1820	2047	2069		2311	2225	2361		2467	2496	2382		2311	2340	2175		1811	1889	1742
Bradi1g02970		3	0	1		1	1	0		2	1	1		3	3	0		0	0	1		0	0	0
Bradi1g02980		265	329	234		276	254	275		256	258	231		185	230	191		243	289	259		294	240	310
Bradi1g02990		308	289	316		307	406	306		329	306	423		358	385	361		446	499	462		504	534	550
Bradi1g03000		7	16	15		11	24	11		23	17	14		24	10	11		32	22	21		23	20	17
Bradi1g03010		417	431	495		395	389	437		472	445	518		546	580	548		577	529	500		504	498	532
Bradi1g03020		722	732	885		612	795	884		1817	1953	1914		1146	1127	1125		1137	1041	1029		533	572	472
Bradi1g03030		377	344	437		391	533	431		434	387	499		451	447	448		661	695	606		756	694	865
Bradi1g03040		11	11	9		10	6	13		14	7	11		6	8	9		4	17	13		3	10	6
Bradi1g03050		635	607	517		872	729	794		666	736	666		993	988	1002		1108	1239	1119		348	473	463
Bradi1g03056		16	12	18		18	22	12		10	9	10		22	23	14		24	21	25		11	5	15
Bradi1g03063		0	0	0		0	0	0		0	1	0		0	0	0		0	1	0		0	0	0
Bradi1g03070		0	0	0		0	0	0		0	0	0		0	0	0		0	0	0		0	0	0
Bradi1g03080		0	0	0		0	0	0		0	0	0		0	0	0		0	0	0		0	0	0
Bradi1g03090		35	19	45		67	62	61		71	52	64		335	221	301		431	493	538		61	60	74
Bradi1g03100		0	0	0		0	0	0		0	0	0		0	0	0		0	0	0		0	0	0
Bradi1g03105		1	0	0		0	0	1		1	0	0		0	0	0		1	2	0		0	0	0
Bradi1g03110		406	426	387		458	422	389		479	506	534		482	440	461		521	490	516		462	400	445
Bradi1g03120		480.25	498.57	573.61		559.71	504.92	544.41		512.75	510.91	647.05		725.36	610.12	643.65		1082.54	935.14	941.38		330.64	410.38	382.27
Bradi1g03130		821.75	816.43	855.39		783.29	769.08	842.59		891.25	715.09	883.95		1025.64	890.88	946.35		1580.46	1481.86	1324.62		1282.36	1210.62	1268.73
Bradi1g03136		2	7	2		2	6	5		7	1	11		6	6	8		11	6	8		2	8	15
Bradi1g03142		63	62.36	31.89		49.97	43.76	58.68		46.82	33.98	39.89		69.82	48.91	48.62		94.61	133.94	94.81		102	80.64	90.05
Bradi1g03146		0	0	0		0	0	0		0	0	0		0	0	0		0	0	0		0	0	0
Bradi1g03150		159	141	196		176	149	163		156	158	169		213	209	178		308	347	295		352	321	303
Bradi1g03160		2061	1734	1754		1480	1620	1633		1540	1451	1454		2072	2111	2153		1911	1955	1934		2295	2499	2493
Bradi1g03170		731	664	685		690	719	736		831	891	814		1268	1182	1259		2004	2305	1817		858	912	874
Bradi1g03180		5260	4240	5200		4357	4998	4135		3728	3088	4076		3102	2795	3036		4143	4720	4215		11217	11939	12924
Bradi1g03185		103.22	89	104.29		64	53.3	36		201.68	175	128		382.83	317.77	283.88		279.67	312.96	238.33		72.11	82.22	87.12
Bradi1g03191		57.78	53	48.71		51	71.7	60		127.32	78	66		126.17	91.23	80.12		100.33	132.04	110.67		167.89	160.78	184.88
Bradi1g03196		0	0	1		1	0	0		0	0	0		0	0	0		0	0	1		0	0	0
Bradi1g03200		0	0	1		1	0	1		0	0	0		1	0	0		0	0	0		1	0	0
Bradi1g03207		101	97	65		40	41	45		36	31	12		11	24	19		3	6	4		8	24	15
Bradi1g03220		2463	1619	2313		1986	2360	2095		2109	1860	2102		1109	1062	1097		400	340	396		2235	2930	2732
Bradi1g03230		0	0	0		0	0	0		0	0	0		0	0	0		0	0	0		0	0	0
Bradi1g03235		18	13	4		9	2	2		5	3	0		10	3	3		4	1	2		8	14	13
Bradi1g03240		1	0	0		0	0	0		0	0	0		0	0	0		0	0	0		0	0	0
Bradi1g03245		0	0	0		0	0	0		0	0	0		0	0	0		0	0	0		0	0	0
Bradi1g03250		2389	2276	2893		2193	2556	2242		3400	3308	3441		6950	6582	6473		12341	12636	11288		9316	9626	9806
Bradi1g03260		5	3	4		7	5	4		4	4	7		8	1	8		1	8	9		22	23	20
Bradi1g03270		183	201	238		224	227	212		258	230	244		224	247	247		199	271	259		275	234	260
Bradi1g03277		24	19	7		20	35	25		25	37	27		30	21	32		13	70	44		82	43	101
Bradi1g03283		89	82	71		77	85	80		92	97	98		101	104	104		139	164	130		189	197	193
Bradi1g03290		182	154	175		132	158	163		170	155	149		207	199	229		280	246	254		259	312	275
Bradi1g03307		1	1	1		2	5	12		4	0	6		3	4	9		10	10	16		15	1	3
Bradi1g03313		0	0	0		0	0	0		0	0	0		0	0	0		0	0	0		0	0	0
Bradi1g03320		53	80.64	35.11		66.03	62.24	63.32		57.18	74.02	47.11		81.18	63.09	73.38		101.39	152.06	110.19		78	86.36	95.95
Bradi1g03330		17	12	22		10	19	13		16	26	25		12	9	13		22	28	18		18	22	21
Bradi1g03340		1202	1222	1242		877	922	989		735	675	867		468	351	495		500	378	666		1470	1679	1143
Bradi1g03350		47	76	58		159	114	96		63	62	81		83.98	88	95.89		75	97	84		48	38	70
Bradi1g03355		2	2	1		0	0	0		1	0	1		1.02	0	1.11		1	0	0		0	0	0
Bradi1g03360		0	2	0		0	0	0		0	0	0		0	0	1		0	0	3		0	0	0
Bradi1g03367		383	454	548		890	751	720		844	876	895		870	869	876		662	682	731		539	481	455
Bradi1g03380		683	621	672		879	867	788		846	841	917		1075	1141	1157		1140	1566	1373		1262	1108	1352
Bradi1g03392		10	7	4		7	5	1		7	4	2		12	12	11		26	36	21		16	10	8
Bradi1g03400		172	129	134		169	249	148		173	135	188		140	131	130		188	270	200		448	424	477
Bradi1g03410		718	749	983		549	627	694		808	563	889		893	799	842		1044	749	871		549	634	577
Bradi1g03420		123	143	135		122	138	123		124	114	125		114	112	131		144	139	158		156	167	134
Bradi1g03431		0	0	0		0	0	0		0	0	0		0	1	0		0	0	0		0	0	0
Bradi1g03440		1654	1461	1511		1717	1442	1649		1548	1583	1712		2190	2361	2290		2919	2836	2734		2155	2232	2088
Bradi1g03450		284	233	214		314	414	306		350	308	385		448	436	486		513	745	639		1020	873	1107
Bradi1g03460		40	36	42		32	44	33		42	26	50		50	39	50		64	60	57		44	70	44
Bradi1g03470		334	320	274		313	285	352		392	333	389		480	514	554		688	762	656		560	511	616
Bradi1g03480		228.9	195.2	248.9		212.56	261.18	246.48		177.08	166.34	163.03		187.21	208.48	207.8		143.38	150	140.45		305.06	223.14	247.38
Bradi1g03483		0	0	0		0	0	0		0	0	0		0	0	0		0	0	0		0	0	0
Bradi1g03486		40.1	44.8	78.1		12.44	37.82	55.52		66.92	43.66	27.97		28.79	24.52	23.2		38.62	19	44.55		32.94	39.86	26.62
Bradi1g03490		763	788	867		811	811	882		1081	1247	1218		1069	976	1076		911	878	878		651	620	646
Bradi1g03500		103	78	60		97	71	84		93	85	42		177	145	227		119	208	156		67	58	63
Bradi1g03510		12767	11161	8225		3291	2229	2713		5611	3935	2751		14070	11842	14042		15911	17563	15906		3924	4661	4170
Bradi1g03520		0	0	0		0	0	0		0	0	0		0	0	0		0	0	0		0	0	0
Bradi1g03530		1580	1539	1597		1821	1800	2046		1694	1796	1926		1959	1974	2092		1558	1880	1645		2690	2234	2590
Bradi1g03537		11	16	16		24	15	21		53	68	15		6	9	9		8	16	10		11	15	13
Bradi1g03550		610	556	678		780	657	662		643	572	669		577	604	564		615	719	605		970	846	1006
Bradi1g03555		1	6	1		11	9	8		11	7	6		2	5	8		5	5	4		8	6	8
Bradi1g03560		214	204	265		196	223	219		254	199	308.73		541	493	485		726.23	599	740		481	454	459.62
Bradi1g03580		220	168	170		170	182	199		161	166	165		170	182	180		245	275	231		328	342	345
Bradi1g03590		493.29	561.34	649.43		736.75	807.28	715.45		903.04	812.26	866.15		654.08	672.87	684.78		314.7	412.43	383.2		558.04	385.97	473.7
Bradi1g03595		10	11	6		6	5	10		20	5	7		16	2	9		5	12	2		5	1	2
Bradi1g03600		32	25	32		18	44	23		29	19	39		48	55	41		48	46	45		60	44	56
Bradi1g03605		41	39	31		19	28	29		20	26	24		38	40	43		29	23	28		31	31	36
Bradi1g03610		342	343	303		401	374	343		303	245	270		149	166	158		126	113	110		204	194	206
Bradi1g03620		478	487	369		811	821	765		687	688	631		519	512	564		519	605	573		503	436	464
Bradi1g03627		65	37	25		39	32	34		43	45	33		41	41	30		37	34	30		56	80	59
Bradi1g03633		0	0	0		0	0	0		0	0	0		0	0	0		0	0	0		0	0	0
Bradi1g03640		4	5	4		2	5	6		5	5	4		3	0	1		4	1	5		11	6	4
Bradi1g03650		19	32	21		17	21	21		28	22	15		29	24	27		27	21	30		52	45	48
Bradi1g03660		345	357	449		363	388	396		497	423	538		528	539	537		559	532	587		475	407	423
Bradi1g03670		10	8	9		19	16	8		8	4	15		24	9	16		24	30	26		30	35	27
Bradi1g03672		0	2	0		0	0	1		0	1	0		0	1	0		0	2	0		1	0	0
Bradi1g03675		4	4	2		6	1	2		1	3	5		5	3	3		5	7	6		5	1	7
Bradi1g03681		0	0	0		0	1	0		0	0	0		0	0	1		0	0	0		0	1	0
Bradi1g03686		394	245	583		113	225	42		173	52	222		137	115	227		17	8	34		487	363	462
Bradi1g03690		1292	1408	1482		2441	2369	2001		2143	2187	1813		1263	1404	1183		768	887	873		847	921	1012
Bradi1g03700		138	109	169		90	148	106		118	71	125		148	124	134		200	143	142		193	218	197
Bradi1g03710		101	98	110		94	110	103		138	97	122		157	134	133		118	147	146		128	168	133
Bradi1g03720		7326	6666	7833		8853	9033	7999		8628	8327	8661		12982	11348	13129		14285	19711	14927		15746	15635	17324
Bradi1g03730		519	514	578		482	514	521		561	588	616		664	631	576		808	876	810		831	712	725
Bradi1g03737		40	38	41		36	52	39		58	41	46		43	43	40		65	73	65		97	93	96
Bradi1g03750		6995	6601	7290		6735	6771	6798		6586	6111	6381		6226	6510	6540		5197	5074	5581		6403	6514	6016
Bradi1g03760		1616	1170	1849		805	669	699		392	449	422		115	92	108		122	181	141		130	196	127
Bradi1g03770		2326	1286	2559		188	309	187		112	132	139		42	21	38		43	59	43		22	36	47
Bradi1g03780		1275	739	1493		212	149	105		27	29	35		12	17	21		21	13	9		6	3	7
Bradi1g03790		195	174	216		36	32	34		49	25	37		16	17	30		36	22	17		33	23	10
Bradi1g03800		805	733	822		827	799	862		700	655	826		823	902	899		1013	1090	1000		1331	1150	1360
Bradi1g03810		0	0	0		0	0	0		0	1	1		0	0	2		1	1	4		3	3	0
Bradi1g03820		1175	1011	1256		1022	1172	1119		1356	1293	1425		1145	1221	1132		1082	914	856		854	866	965
Bradi1g03827		264	254	300		438	376	278		249	237	207		132	233	192		176	235	189		231	238	244
Bradi1g03840		1367	1607	1455		1268	1397	1333		858	926	721		501	534	536		207	193	187		586	497	523
Bradi1g03850		385	424	378		333	317	309		243	203	262		277	297	304		282	260	293		393	471	416
Bradi1g03853		0	0	0		0	0	0		0	0	0		0	0	0		0	0	0		0	0	0
Bradi1g03856		0	1	0		0	1	0		1	0	0		1	1	0		0	5	1		2	1	1
Bradi1g03860		622	602	620		654	704	722		812	785	882		923	1034	1026		910	1060	985		1035	901	1013
Bradi1g03867		108	109	101		100	141	103		157	145	126		181	235	167		224	267	230		208	219	213
Bradi1g03880		80	121	96		82	85	87		78	77	75		73	92	89		63	87	72		211	185	185
Bradi1g03890		543	521	642		500	490	507		516	563	510		634	649	596		559	514	520		480	490	516
Bradi1g03900		212	226	209		179	162	208		335	216	316		488	479	467		591	540	490		292	281	263
Bradi1g03910		739	593	948		765	780	746		438	550	628		273	223	334		147	140	191		2114	2283	2134
Bradi1g03920		279	298	346		316	327	310		371	407	452		469	513	450		421	444	433		434	426	443
Bradi1g03925		85.8	71.98	54.56		183	176.82	95.56		142.21	165.65	166.77		191.57	226.03	157.57		104.79	188.23	157.93		131.76	132.2	120.26
Bradi1g03930		394	340	408		346	326	357		357	326	384		395	451	408		546	520	523		529	550	494
Bradi1g03940		258	288	285		215	223	181		175	147	128		94	88	86		55	69	69		151	153.98	138
Bradi1g03947		144	202	156		160	165	146		136	126	93		95	84	82		68	93	92		226	244	204
Bradi1g03950		0	0	0		0	0	0		2	0	2		0	0	3		1	0	1		0	2.02	0
Bradi1g03951		9	7	9		34	35	18		18	23	23		23	33	26		22	45	34		37	23	41
Bradi1g03953		47	46	64		40	52	36		43	34	48		57	48	78		87	46	58		54	62	54
Bradi1g03954		6	7	4		6	7	2		5	3	7		6	6	6		5	20	7		17	21	21
Bradi1g03956		242	241	193		215	231	231		245	260	317		323	305	336		336	348	307		258	242	290
Bradi1g03962		22	17	6		31	18	23		31	22	17		34	34	29		38	46	49		23	26	32
Bradi1g03965		458	454	442		361	386	406		422	389	456		503	509	421		538	493	507		367	424	368
Bradi1g03972		1	1	0		4	0	0		1	0	0		4	5	2		1	1	4		0	0	1
Bradi1g03977		0	0	0		0	0	0		0	0	0		0	0	0		0	0	0		0	0	0
Bradi1g03980		891	817	815		537	596	589		895	858	769		2405	2086	2207		3102	3094	2871		1347	1394	1403
Bradi1g03990		159	175	193		218	230	215		228	207	223		293	309	313		353	434	382		316	315	292
Bradi1g04000		422	328	375		444	422	379		240	211	228		383	344	389		399	547	406		712	672	756
Bradi1g04010		103	127	98		210	203	162		184	164	151		71	53	63		63	75	82		39	54	45
Bradi1g04015		0	0	0		0	0	0		0	1	0		0	0	0		0	0	0		0	0	0
Bradi1g04020		0	0	0		0	2	1		3	3	3		2	7	5		2	2	4		3	1	0
Bradi1g04030		127	158	187		139	123	129		157	126	151		190	187	197		254	265	231		173	194	179
Bradi1g04040		0	0	0		0	1	0		1	0	0		0	0	0		0	0	1		0	0	0
Bradi1g04050		2	1	5		1	4	2		4	4	5		1	2	0		4	12	6		6	4	8
Bradi1g04055		65	62	38		52	58	41		42	62	57		63	65	56		73	107	85		87	99	124
Bradi1g04060		85	66	90		90	72	67		84	71	86		134	89	89		162	184	170		169	135	166
Bradi1g04070		4121	3433	5261		2831	3508	3312		3473	2898	3536		3126	3081	3093		3740	2788	2866		2977	4119	3258
Bradi1g04080		1155	1161	865		1250	1127	1115		1916	2163	1690		1731	1779	1725		838	1022	950		1008	977	1092
Bradi1g04090		431	462	463		363	320	402		380	380	420		439	468	449		575	412	520		531	524	465
Bradi1g04097		443	396	451		436	498	498		544	528	521		507	464	504		549	557	533		491	626	573
Bradi1g04110		2023	2176	2114		2143	2190	2320		2643	2394	2537		2940	2811	2878		3054	3110	3066		2336	2449	2447
Bradi1g04120		843	780	808		521	655	556		674	673	654		453	460	489		585	622	530		825	906	947
Bradi1g04125		0	0	0		0	0	0		0	0	0		0	0	0		0	0	0		0	0	0
Bradi1g04130		3563	2552	3297		2938	3478	3200		2824	2614	2949		1610	1301	1486		575	533	599		3771	4549	4352
Bradi1g04135		0	0	0		0	0	0		0	0	0		0	0	0		0	0	0		0	0	0
Bradi1g04140		8372	8101	9096		8148	8470	8440		12132	13923	11482		15128	15335	16765		7867	7432	7431		9453	9149	10323
Bradi1g04145		0	0	0		0	0	0		0	0	0		0	0	0		0	0	0		0	0	0
Bradi1g04150		13036	10108	11715		3588	4637	3925		5137	4075	3333		4121	3587	4445		4668	5548	3368		875	1000	1313
Bradi1g04160		522	429	514		409	512	478		521	423	497		519	439	472		765	617	673		503	629	513
Bradi1g04170		5	1	16		19	14	7		15	6	15		10	11	19		4	2	7		4	2	2
Bradi1g04180		1729	1703	1807		1761	1951	1674		1806	1711	1751		1918	1968	2006		2497	2879	2458		2969	2665	2991
Bradi1g04191		121	123	110		95	105	103		132	118	128		116	116	107		134.89	143	138.69		102	120	144
Bradi1g04200		51	65	78		62	71	59		51	59	79		54	46	46		83	83	104		113	96	168
Bradi1g04210		720	449	724		750	931	689		832	744	1087		414	357	440		331	376	369		998	1000	1153
Bradi1g04215		0	0	1		1	0	1		0	0	2		1	0	2		0	0	3		2	0	0
Bradi1g04220		4311	4058	4429		4229	4609	4590		4761	4986	5193		4464	3998	4128		3018	3014	3107		2967	2589	2761
Bradi1g04226		236	187.43	170		181	223	182		192	168	242.47		285	269	319.55		325	310.49	309		444.61	399	411
Bradi1g04229		0	1	0		0	0	1		0	0	0		0	0	0		0	0	2		0	1	1
Bradi1g04232		452	443	547		307	350	363		348	313	431		400	355	407		527	429	457		481	499	445
Bradi1g04240		800	638	777		610	613	656		787	737	754		1016	1009	869		1105	986	1079		755	923	737
Bradi1g04245		0	0	0		0	0	0		0	0	0		0	0	0		0	0	0		0	0	0
Bradi1g04250		429	426	469		383	381	396		376	317	428		460	372	417		570	512	496		487	535	547
Bradi1g04261		5	10	4		6	4	5		4	4	4		6	2	3		4	5	2		6	3	0
Bradi1g04270		350	354	349		324	301	291		313	305	296		453	444	507		615	713	641		646	544	661
Bradi1g04280		20	12	26		26	16	18		32	27	24		44	32	31		29	30	24		14	10	15
Bradi1g04286		11	5	3		9	4	9		7	13	10		9	9	7		10	9	13		11	5	10
Bradi1g04287		0	0	2		0	0	0		1	0	0		0	0	0		0	0	0		0	0	0
Bradi1g04288		1	0	0		0	1	0		0	1	0		0	1	1		0	3	0		0	1	0
Bradi1g04290		12	9	3		16	22	10		13	12	17		33	17	28		26	33	23		32	17	22
Bradi1g04292		31	41	30		29	38	45		60	52	73		89	86	80		81	84	80		41	33	39
Bradi1g04300		1664	1341	1808		1634	1837	1717		1542	1638	1813		997	1048	1136		737	714	709		2584	2497	2800
Bradi1g04305		0	0	0		1	0	1		1	3	1		2	3	3		3	7	5		6	0	4
Bradi1g04310		299	339	342		375	393	339		392	409	458		544	544	541		559	676	647		500	442	496
Bradi1g04320		94	92	108		86	92	94		82	70	92		195	157	150		157	124	127		94	107	96
Bradi1g04330		1444	1441	1580		1549	1574	1537		1727	1603	1670		1952	1907	2021		1934	2196	1961		2171	1901	2097
Bradi1g04337		3743	3587	3377		3521	4076	3531		3849	4284	4010		3981	3734	3863		4969	5586	5564		7115	5801	5545
Bradi1g04348		18	31	14		39	18	24		16	13	12		18	19	34		23	26	18		5	5	4
Bradi1g04359		3	0	0		0	1	0		0	2	2		1	4	2		1	0	3		0	0	0
Bradi1g04370		0	0	0		0	0	0		1	1	0		1	0	0		0	0	1		0	0	0
Bradi1g04390		0	1	0		1	0	0		0	1	1		0	1	0		0	1	0		0	0	0
Bradi1g04397		0	1	0		1	0	0		0	0	0		2	0	2		0	4	0		0	1	1
Bradi1g04403		0	0	0		0	0	0		0	0	0		0	0	0		0	0	0		0	0	0
Bradi1g04410		0	0	0		0	0	0		0	0	0		0	0	0		0	0	0		0	0	0
Bradi1g04420		0	0	0		0	0	0		0	0	0		0	0	0		0	0	0		0	0	0
Bradi1g04430		0	0	0		1	0	0		0	0	0		2	2	1		0	1	0		0	0	0
Bradi1g04440		908	882	971		1734	1653	1682		1978	2253	2092		1218	1334	1278		806	977	854		895	752	811
Bradi1g04450		2	4	3		9	6	13		23	24	17		42	28	44		19	28	38		21	26	25
Bradi1g04460		57	52	48		117	90	55		78	67	71		67	58	67		66	89	79		38	32	37
Bradi1g04470		0	0	0		1	0	0		1	1	0		2	3	1		0	0	0		1	1	2
Bradi1g04477		427	387	466		384	407	389		341	294	454		390	399	404		513	567	536		608	581	693
Bradi1g04490		0	1	0		0	1	0		3	0	1		1	0	1		0	0	0		0	1	2
Bradi1g04500		138	126	194		230	204	203		343	311	327		338	465	341		294	226	264		133	115	157
Bradi1g04503		0	0	0		0	0	0		0	0	0		0	0	0		2	0	1		0	0	1
Bradi1g04506		0	0	0		0	0	0		0	0	0		0	0	0		0	0	0		0	0	0
Bradi1g04510		0	0	0		1	0	0		0	0	0		0	0	0		0	0	0		0	0	0
Bradi1g04520		1313	1233	1306		1793	1586	1593		1641	1854	1752		1667	1614	1763		1443	1696	1524		2171	1931	2063
Bradi1g04527		55	58	55		111	98	113		96	107	117		79	113	81		112	125	101		59	55	44
Bradi1g04540		516	481	511		461	488	536		546	572	570		619	676	660		719	737	649		663	640	653
Bradi1g04550		79	74	53		88	100	123		128	102	125		249	227	230		327	329	342		105	110	106
Bradi1g04561		7	4	4		6	16	9		10	3	5		16	14	13		19	15	17		8	10	7
Bradi1g04570		483	475.69	566.86		418.11	427.22	480.85		510.85	461.44	568.71		657.75	731.17	679.54		820.58	802.48	761.77		713.77	636.16	680.05
Bradi1g04580		71	67	50		42	65	55		99	81	56		131	133	132		68	112	101		43	49	38
Bradi1g04590		262	290	296		312	317	289		323	295	346		265	299	308		363	321	337		307	288	285
Bradi1g04597		283	351	398		626	540	568		496	566	491		716	641	698		1226	1405	1209		1167	1078	1313
Bradi1g04603		3	0	1		2	1	1		0	2	3		2	4	2		0	1	1		1	0	2
Bradi1g04610		0	0	0		0	0	0		0	0	0		0	0	0		0	0	0		0	0	0
Bradi1g04620		3774	3865	3362		3722	3139	3257		2133	2474	2106		1127	1169	1178		367	334	399		1158	1324	1029
Bradi1g04625		7	3.12	1		3	0	0		4	3	3		3	0	0		2	2	1		0	0	1
Bradi1g04630		0	0	0		0	0	0		0	0	0		0	0	0		0	0	0		0	0	0
Bradi1g04641		0	0	0		0	0	0		0	0	0		0	0	0		0	0	0		0	0	0
Bradi1g04650		0	0	0		0	0	0		0	0	0		0	0	0		0	0	0		0	0	0
Bradi1g04660		2824	2290	3321		2165	2698	2482		2555	2353	3039		2809	2802	3059		2994	2716	2613		3063	3530	3284
Bradi1g04670		0	0	0		0	0	0		0	0	0		0	0	0		0	0	0		0	0	0
Bradi1g04677		0	0	0		0	0	0		0	0	0		0	0	0		0	0	0		1	0	0
Bradi1g04679		0	0	0		0	0	0		0	0	0		0	0	0		0	0	0		0	0	0
Bradi1g04681		1	0	0		0	1	1		0	1	1		0	0	2		0	1	0		0	0	0
Bradi1g04683		41	30	43		49	46	37		56	79	67		67	57	51		49	60	50		61	59	73
Bradi1g04690		439	386	560		377	434	498		351	344	400		284	325	321		207	218	239		454	378	368
Bradi1g04700		79522	91446	78701		69935	68410	75268		66149	62942	58667		59744	60614	57873		44801	39264	43924		42142	52036	43530
Bradi1g04710		736	755	812		630	636	580		654	583	633		538	643	586		697	641	620		584	584	568
Bradi1g04720		461	562	429		450	471	415		323	263	284		155	194	116		73	54	72		102	110	94
Bradi1g04730		132	128	107		107	98	117		95	95	119		145	121	130		232	170	204		137	184	135
Bradi1g04740		549	544	662		551	646	607		636	596	621		639	705	632		489	487	545		427	391	373
Bradi1g04750		1076	1478	850		832	996	1144		1193	1250	1071		487	614	543		247	224	168		196	246	186
Bradi1g04760		112	106	73		135	180	142		119	120	129		74	96	91		51	81	56		130	134	125
Bradi1g04772		2	4	1		7	3	3		5	1	4		2	3	1		0	2	1		1	0	1
Bradi1g04780		422	453	605		997	947	1109		662	654	643		556	551	465		349	381	380		361	257	276
Bradi1g04790		393	363	381		514	507	589		590	649	572		850	782	835		723	689	629		371	360	407
Bradi1g04800		111	105	151		95	151	117		123	99	160		121	103	145		186	173	153		190	165	168
Bradi1g04810		2035	1787	2185		1890	1902	2029		1360	1430	1489		893	785	951		606	561	543		2311	2488	2014
Bradi1g04820		698	628	715		619	618	645		668	594	769		978	935	906		1083	1005	1030		774	830	802
Bradi1g04830		1682	1676	1944		1965	2124	2090		2023	2351	2230		2383	2203	2485		2402	2791	2670		3557	2909	3396
Bradi1g04835		0	0	0		0	1	1		0	1	0		0	2	1		0	5	1		5	1	3
Bradi1g04840		365	376	437		916	812	837		542	572	546		460	430	474		537	504	481		265	229	235
Bradi1g04850		1628	1490	1796		1578	1550	1559		1818	1948	1945		1533	1716	1664		1204	1242	1135		1463	1517	1540
Bradi1g04860		1203	1086	1308		1561	1563	1617		1662	1918	2018		2469	2526	2625		2412	3247	2648		2399	1951	2261
Bradi1g04870		493	348	405		434	412	421		409	438	449		501	466	441		536	609	475		258	336	334
Bradi1g04880		8	8	12		7	16	13		19	7	7		16	6	15		20	20	23		32	35	35
Bradi1g04890		0	0	0		0	0	0		1	0	2		2	0	0		0	0	3		1	2	2
Bradi1g04900		0	3	1		5	0	0		0	0	0		1	0	2		0	3	1		1	1	5
Bradi1g04903		0	0	0		0	0	0		0	0	0		1	0	0		0	1	0		0	0	0
Bradi1g04907		381	407	463		1146	1195	1184		1342	1347	1598		1187	1137	1038		554	511	670		310	254	306
Bradi1g04917		431	377	367		550	542	506		488	556	511		451	442	450		472	628	538		463	433	544
Bradi1g04930		627	807	499		656	482	593		780	625	582		605	656	540		662	644	634		632	744	658
Bradi1g04935		0	0	0		0	0	0		0	0	0		0	0	0		0	0	0		0	0	0
Bradi1g04940		137	149.3	162		155.51	155.93	165.74		175.99	166.39	170.36		205.23	170	214.74		195	211.83	214.23		167.56	188.35	181.25
Bradi1g04950		3605	3132.7	4128		3606.49	4295.07	3795.26		3999.01	3758.61	4474.64		4208.77	3970	4237.26		4625	4338.17	4504.77		4863.44	4876.65	5055.75
Bradi1g04953		2	2	1		1	1	4		1	1	7		4	1	2		4	1	2		4	5	4
Bradi1g04957		274	254	281		519	561	491		276	331	366		313	292	298		460	506	411		357	323	324
Bradi1g04963		1	0	1		2	2	2		0	0	0		2	2	3		2	2	0		6	1	2
Bradi1g04970		4	0	1		0	0	3		0	0	0		1	0	0		0	1	3		2	0	2
Bradi1g04975		1	6	3		5	3	1		4	6	4		6	4	4		7	2	5		2	9	7
Bradi1g04980		111	106	142		200	222	212		182	185	198		245	244	234		247	334	275		329	265	399
Bradi1g04990		390	463	639		2288	1756	1355		916	909	908		95	158	134		66	80	84		42	41	46
Bradi1g05000		10	13	10		12	16	19		16	9	18		13	17	12		9	8	11		14	16	12
Bradi1g05010		23	24	28		19	23	19		29	20	32		10	4	7		4	7	11		39	30	28
Bradi1g05020		0	0	0		0	0	0		0	0	0		0	0	0		0	0	0		0	0	0
Bradi1g05030		4095	3908	4305		3569	3806	3929		4705	4328	4518		4702	5194	4844		5660	5265	4967		3656	4031	3804
Bradi1g05037		138	124	198		150	119	111		113	82	146		247	226	197		212	182	171		84	92	116
Bradi1g05050		995	982	1132		986	1100	1134		1152	982	1258		1504	1584	1546		1556	1698	1495		1726	1600	1801
Bradi1g05056		12	20	22		15	17	24		9	14	15		27	26	39		39	39	41		21	34	31
Bradi1g05062		0	0	0		0	0	0		0	0	0		0	0	1		0	0	0		0	0	0
Bradi1g05070		651	642	618		622	639	604		590	569	609		793	795	695		969	1189	1034		818	716	808
Bradi1g05080		767	804	1091		565	728	924		805	666	781		439	536	469		474	377	505		658	584	502
Bradi1g05090		7	16	6		29	23	21		17	13	18		24	24	32		14	39	29		27	19	34
Bradi1g05100		560	852	805		2465	1755	1576		577	547	598		217	212	244		220	172	233		73	98	92
Bradi1g05110		437	393	523		399	456	418		365	298	440		474	522	481		601	739	605		723	630	728
Bradi1g05116		156	133	162		141	182	160		164	129	166		158	172	156		196	188	188		275	299	301
Bradi1g05122		2011	2000	2135		2319	2198	2284		2472	2648	2588		3197	3192	3125		2848	3144	2857		2795	2256	2758
Bradi1g05130		236	226	262		215	236	226		189	232	235		326	289	289		498	565	476		719	548	716
Bradi1g05141		130.61	140.03	115.31		68.87	67.18	61.77		75.95	52.23	74.53		89.14	76.34	97.93		126.73	114.73	141.57		230.31	303.06	179.01
Bradi1g05150		967.39	927.97	1162.69		966.13	1061.82	1026.23		1144.05	1015.77	1155.47		1463.86	1454.66	1318.07		1507.27	1410.27	1486.43		1523.69	1497.94	1273.99
Bradi1g05156		167	95	154		93	108	127		135	101	136		129	104	106		172	148	155		161	256	199
Bradi1g05162		7.14	5.11	7.08		4.03	11.14	6.09		10.16	5.09	9.21		15.29	9.13	11.2		12.29	6.13	9.2		7.13	10.2	10.17
Bradi1g05170		651.86	604.89	620.92		671.97	651.86	681.91		870.84	747.91	836.79		816.71	902.87	785.8		968.71	958.87	892.8		818.87	686.8	754.83
Bradi1g05180		398	527	384		913	893	1074		1740	1796	1256		1809	1739	1608		1082	1258	1243		529	492	523
Bradi1g05190		6	7	0		4	4	3		7	11	5		11	18	23		9	17	11		2	4	5
Bradi1g05192		0	0	0		0	0	0		0	0	0		0	0	0		0	0	0		0	0	0
Bradi1g05195		0	0	0		0	0	0		0	0	0		0	0	0		0	0	0		0	0	0
Bradi1g05198		9	11	9		6	4	10		7	14	11		23	14	23		24	11	29		8	13	12
Bradi1g05202		0	0	0		0	0	0		0	0	0		0	0	0		0	0	0		0	0	0
Bradi1g05206		280	286	342		375	367	420		490	466	443		317	343	314		263	254	270		204	232	195
Bradi1g05208		0	0	0		0	0	0		0	0	0		0	0	0		0	0	0		0	0	0
Bradi1g05210		75	119	107		138	144	146		174	143	150		189	186	181		167	181	183		71	70	64
Bradi1g05217		607.97	592.88	544.34		727.36	712.61	648.69		710.88	718.64	708		1064.12	943.75	994.66		1027.58	1187.96	1018.09		1078.37	890.63	963.72
Bradi1g05230		28	20	14		30	36	32		36	26	27		44	53	55		24	31	25		20	15	23
Bradi1g05240		1954	1266	2052		1471	1816	1590		1557	1294	1887		706	584	711		384	347	343		2566	2837	2741
Bradi1g05247		40	34	25		44	32	35		34	37	38		68	62	59		56	74	61		37	42	44
Bradi1g05260		104	88	51		84	101	90		81	72	72		109	119	126		132	121	144		126	86	150
Bradi1g05270		0	0	0		0	0	0		0	0	1		0	0	0		0	0	0		0	0	0
Bradi1g05276		0	0	0		0	0	0		0	0	0		0	0	0		0	0	0		0	0	0
Bradi1g05290		0	0	0		0	0	0		0	0	0		0	0	0		0	0	0		0	0	0
Bradi1g05296		0	0	0		0	0	0		0	0	0		0	0	0		0	0	0		0	0	0
Bradi1g05301		0	0	0		0	0	0		0	0	0		0	0	0		0	0	0		0	0	0
Bradi1g05306		20.8	13.57	20.48		21.16	15.77	15.25		28.61	23.03	17.73		23.71	26.61	23.16		11.61	11.99	10.91		15.18	17.74	17.11
Bradi1g05310		24.19	29.43	32.52		43.84	39.23	48.75		65.39	89.97	82.47		69.29	69.39	81.84		67.39	95.01	103.09		90.82	67.26	75.89
Bradi1g05320		192	186	165		218	210	207		164	172	140		199	177	186		187	219	194		231	219	206
Bradi1g05322		0	1	1		1	2	0		1	2	0		1	1	2		1	2	1		3	1	3
Bradi1g05325		1	0	1		1	3	0		1	1	1		0	3	0		0	1	3		2	0	0
Bradi1g05328		0	0	0		0	0	0		0	0	0		0	0	0		0	0	0		0	0	0
Bradi1g05330		658	686	536		605	729	784		764	682	786		2546	2207	2378		3376	3889	4264		3739	3293	2831
Bradi1g05340		2244	1949	2721		1889	2079	2099		2103	1839	2619		2217	1963	2304		2304	2017	2092		2013	2388	2228
Bradi1g05346		1	4	4		4	8	6		9	10	8		6	7	7		1	6	2		11	5	7
Bradi1g05360		257	160	208		220	257	244		218	255	255		289	274	278		316	359	324		354	269	349
Bradi1g05371		58	52	61		63	45	58		71	68	68		64	60	57		77	72	64		42	52	48
Bradi1g05380		0	0	0		0	0	0		0	0	1		1	0	0		1	0	0		1	1	1
Bradi1g05390		234	243	277		373	271	345		397	279	350		451	450	369		555	585	621		303	362	368
Bradi1g05397		0	0	0		0	0	0		0	0	0		0	0	0		0	0	0		0	0	0
Bradi1g05410		1	4	4		2	1	1		2	2	2		6	5	3		5	3	0		7	13	13
Bradi1g05420		888	864	892		893	947	852		903	824	969		1070	948	1016		1287	1411	1261		1012	945	994
Bradi1g05430		795	793	805		641	670	698		657	568	581		769	675	755		1054	1041	1033		1027	989	976
Bradi1g05450		399	1150	402		870	250	185		115	80	123		9	15	12		0	1	1		0	3	6
Bradi1g05460		6	5	1		0	0	0		2	0	5		0	5	0		1	0	0		0	0	0
Bradi1g05467		549	515	545		524	449	494		460	479	536		737	690	748		1062	1029	965		747	677	694
Bradi1g05480		3402	2394	2303		1721	1168	1211		1300	1218	917		2069	1826	2144		3062	3456	2533		1265	1248	1215
Bradi1g05490		717	679	802		764	755	743		818	966	916		721	690	678		638	675	576		719	593	679
Bradi1g05500		952	1179	815		1091	1521	1496		1424	1485	1543		1516	1466	1442		1913	1851	1782		3601	3092	3039
Bradi1g05510		2170	1802	2569		1831	2601	2035		2330	2027	2624		2599	2598	2719		3201	3430	3176		3337	3413	3430
Bradi1g05520		247	191	232		152	140	142		165	138	152		187	164	205		234	211	209		217	218	200
Bradi1g05530		1	1	1		0	1	0		1	0	0		0	0	0		0	0	0		0	0	0
Bradi1g05535		0	0	0		0	0	0		0	0	0		0	0	0		0	0	0		0	0	0
Bradi1g05540		4	2	2		7	7	2		5	6	6		11	17	5		8	7	6		8	10	4
Bradi1g05550		302	293	315		303	384	374		376	413	364		298	282	328		245	242	221		418	407	439
Bradi1g05560		531	453	598		646	710	687		855	912	826		1233	1288	1223		1258	1381	1317		1149	1046	1019
Bradi1g05570		19	17	13		14	12	20		8	24	19		15	12	20		13	14	17		9	25	12
Bradi1g05580		1806	1776	1993		1885	1830	2102		2013	2004	2078		2301	2363	2349		1938	1685	1726		1417	1404	1494
Bradi1g05585		15	4	3		1	3	2		6	6	2		3	2	3		9	6	4		3	4	2
Bradi1g05590		144	140	169		356	360	333		226	247	228		239	278	233		209	284	263		290	241	288
Bradi1g05600		44	40	34		140	185	220		315	291	277		57	50	65		38	27	38		32	26	35
Bradi1g05610		142	89	118		141	175	155		121	95	120		152	113	151		174	219	166		443	383	467
Bradi1g05620		387	386	338		191	231	206		185	171	174		151	154	178		122	139	143		260	278	245
Bradi1g05630		615	505	549		599	636	554		599	532	662		658	675	672		867	836	752		746	752	824
Bradi1g05640		0	0	1		0	3	0		0	1	0		3	0	1		0	0	0		1	0	0
Bradi1g05650		1621	1472	1477		1516	1604	1602		1526	1448	1624		2349	2283	2194		3717	4504	3845		2747	2706	2703
Bradi1g05655		1	3	3		5	2	0		0	1	1		0	2	0		0	0	0		3	2	5
Bradi1g05660		1020	1003	1061		1192	1151	1126		1416	1444	1351		1341	1448	1432		1587	1803	1608		1578	1410	1735
Bradi1g05670		4160	3310	4999		2969	3914	3346		3801	3143	3954		4390	4093	4081		5032	4179	4366		3918	4716	4149
Bradi1g05680		270	247	227		302	367	281		329	302	390		387	377	366		407	542	540		727	687	730
Bradi1g05690		28	32	31		70	64	95		107	96	114		44	69	36		42	32	44		56	39	30
Bradi1g05700		3	5	2		3	6	3		7	6	2		2	6	2		3	2	5		5	11	6
Bradi1g05707		73.76	65.89	58.28		161.94	153	110.47		125.21	167.07	146.89		149.01	133.67	127.91		94.58	169.94	120.4		195.39	162.2	225.21
Bradi1g05715		3083.83	2211.17	2299.9		1643.12	1689.6	1610.06		1999.25	1632.28	2275.83		1593.54	1742.09	1295.03		1811.46	896.09	1111.86		731.85	1496.75	729.09
Bradi1g05721		0	0	0		0	0	0		0	0	0		0	0	0		0	0	0		0	0	0
Bradi1g05724		0	0	0		0	0	0		0	0	0		0	0	0		0	1	1		1	0	0
Bradi1g05728		48.52	29.49	70.31		18.21	19.96	10.03		25.96	25.47	26.43		15.85	13.54	20.17		8.52	1.42	11.87		9.18	11.53	5.94
Bradi1g05731		0	0	0		0	0	0		0	0	0		0	0	0		0	0	0		0	0	0
Bradi1g05735		102.67	70.56	58.65		38.74	45.87	47.94		47.09	40.15	56.36		37.57	40.36	39.32		46.48	22.28	34.48		19.21	25.87	22.5
Bradi1g05738		0	0	0		0	0	0		0	0	0		0	0	0		0	0	0		0	0	0
Bradi1g05739		79.86	92.36	44.68		78.24	51.06	91.83		47.19	61.94	61.64		66.63	32.35	38.74		30.22	23.48	46.25		23.52	27.84	29.56
Bradi1g05740		3318.76	4066.91	2606.23		2869.15	3204.13	3062.64		2866.48	3379.41	2729		2224.26	2455.39	2083.67		2053.05	1920.68	1840.21		2028.85	2058.24	1770.7
Bradi1g05741		3.48	1.87	3.35		1.88	5.73	3.6		3.68	0	0		3.61	0	1.99		0	1.68	1.99		3.25	0	0
Bradi1g05742		196.78	152.01	190.32		145.87	87.02	140.35		88.76	96.25	132.48		42.48	53.64	50.98		72.9	62.89	46.79		42.41	76.18	45.77
Bradi1g05743		905.75	686.55	826.81		517.96	623.23	622.86		536.43	403.19	839.25		463.97	498.18	364.46		633.64	311.12	417.53		293.64	403.92	357.83
Bradi1g05746		0	0	0		0	0	0		0	0	0		0	0	0		0	0	0		0	0	0
Bradi1g05747		1.35	1.14	5.37		1.49	3.73	0		2.8	1.41	4.29		4.29	4.59	1.41		1.33	0	0		0	1.28	1.38
Bradi1g05748		0	0	0		0	0	0		0	0	0		0	0	0		0	0	0		0	0	0
Bradi1g05749		2.29	1.2	2.37		0	0.95	0		2.34	1.03	3.6		1.11	1.22	0		0	0	0		0	2.25	0
Bradi1g05750		246.83	126.01	175.65		244.28	283.13	231.54		203.09	230.79	549.06		442.27	210.67	223.77		267.25	401.79	223.19		245.1	468.71	212.56
Bradi1g05752		3720.45	3258.02	3909.01		2916.58	4313.69	2900.16		4026.39	3458.67	4093.91		2774.8	2902.54	2595.64		2299.76	1928.38	2042.23		2196.98	1919.83	2600.24
Bradi1g05753		0	0	0		0	0	0		0	0	0		0	0	0		0	0	0		0	0	0
Bradi1g05755		23.71	17.83	23.52		10.82	14.83	2		11.74	13.82	15.85		16.84	8.83	13.94		17.74	12.83	17.77		3.87	10.94	7.9
Bradi1g05756		8697.45	8252.56	7594.68		8695.57	10656	9212.91		9337.79	10426.5	10090.1		11188.9	11837.6	9487.99		11086.9	10095.5	11212.4		9975.43	9350.75	9315.37
Bradi1g05757		831.42	1026.63	536.84		600.31	706.33	697.15		730	907.89	721.34		533.22	587.37	577.47		467.95	507.69	454.1		406.67	470.3	418.66
Bradi1g05758		313.34	434	252		218	297	329		246	389.2	265		238	219	200.34		193	197.08	164.27		140.37	158	135
Bradi1g05760		2.48	2.94	0		1	1.48	4		0	0	3.63		0	0.17	4.95		2.48	2	2.38		1	2	1.58
Bradi1g05761		1453.42	1076.11	743.63		3315.08	3152.04	2290.73		2188.33	3446.43	2759.35		2655.13	2592.3	3121.62		1941.17	4579.5	2328.01		4545.17	2837.39	3627.5
Bradi1g05762		23.64	46.4	26.38		16.05	16.89	18.74		34.05	28.07	27		8.55	14.01	12		15.74	12.48	9.32		12	10	14
Bradi1g05763		454	318.17	182.57		668.39	645.25	518.28		428.01	704.88	631.27		559.85	455.54	620.23		423.72	602.1	491.38		601.84	563.77	445.71
Bradi1g05764		35.86	60.72	16.8		13.8	26.58	35.6		33.96	27.13	33.88		27.86	19.72	14		13.77	29.73	15.35		29.95	22.86	14
Bradi1g05765		14642.2	10020.2	10163.1		10960.8	10944.6	10904.6		9478.11	8982.46	10976.8		8660.92	10657	8138.1		10736.7	7177.95	6746.21		5912.27	9834.22	5944.13
Bradi1g05766		1.66	0	0		0	0	0		0	1.8	0		0	0	1.66		0	2.92	0		1.63	0	0
Bradi1g05767		10159.3	6638.29	6433.8		5993.63	6440.32	5577.35		6807.48	5207.81	6535.79		5246.63	7033	5238.23		7182.41	3165.56	3998.21		2220.6	4891.71	2431.84
Bradi1g05768		544.58	550.19	384.73		209.69	194.97	177.34		344	245.11	409.66		228.78	292.34	185.63		230.05	91.31	159.9		94.33	165.7	82.53
Bradi1g05769		74645.1	55973.5	68474.9		54654.1	57050	48684.4		57032.5	56539.1	63802.9		43542.8	47364.1	41271.2		51363.3	38158.7	34839		34138.3	47844.9	33042.4
Bradi1g05772		0	0	0		0	0	0		0	0	0		0	0	0		0	0	0		0	0	0
Bradi1g05774		0	0	0		0	0	0		0	0	0		0	0	0		0	180.08	0		293.22	0	80.55
Bradi1g05775		4.16	2.47	2.8		0	1.44	2.98		0	0	0		0	0	0		4.13	1.09	3.35		0	2.92	2.74
Bradi1g05776		402.66	0	628.92		0	0	0		0	0	0		0	0	0		0	0	0		0	0	0
Bradi1g05777		0	0	0		0	0	0		0	0	0		0	0	0		0	0	0		0	0	0
Bradi1g05778		2969.68	1707.81	1873.98		1617.72	1923.52	1423.73		1945.79	1777.91	1732.23		1373.53	1820.49	1336.44		1740.21	1232.72	1098.68		820.33	1417.9	685.17
Bradi1g05779		1.01	0	0		0	0	0		0	1.02	0		0	0	0		0	0	0		0	1.01	0
Bradi1g05781		0	0	0		0	0	0		0	0	0		0	0	0		0	0	0		2.2	0	0
Bradi1g05782		158.94	153.47	93.53		59.48	94.83	78.02		86.74	176.03	133.04		159.21	125.22	108.59		95.68	105.9	165.52		109.91	183.53	55.85
Bradi1g05783		315.09	206.16	165.59		218.73	175	190.25		176.53	228.39	212.03		154.96	185.79	157.75		194.52	107.86	131.01		102.84	170.48	83.41
Bradi1g05784		0	0	0		0	0	0		0	0	0		0	0	0		0	0	0		0	0	0
Bradi1g05785		3.14	2.51	0.99		116.88	137.73	72.93		28.51	68.88	9.18		104.99	13.49	125.19		0	141.78	128.29		128.32	119.85	93.07
Bradi1g05786		0	0.77	0.76		0.71	2.9	1.91		1.53	0	4.01		1.02	2.14	0		0	4.22	3.23		1.98	0.92	4.25
Bradi1g05788		18900.3	15211.8	12956.5		8091.33	5498.76	7753.73		9851.47	7476.92	11697.2		7357.94	9314.42	6757.33		10711.9	3433.8	6120.5		2238.51	7001.88	2337.63
Bradi1g05789		0	0	0		0	0	0		0	0	0		0	0	0		0	0	0		0	0	0
Bradi1g05790		13.37	16.08	3.69		35.59	22.69	19.24		30.91	26.75	21.27		25.97	12.93	25.62		7.41	40.94	7.06		14.28	24.08	25.82
Bradi1g05791		2.3	2	4		1	2.67	2		1.33	3.13	3.2		1.16	1	1		1.54	1.67	0.33		3	2.48	2.24
Bradi1g05792		117.14	78.26	63.27		94.76	99.21	60.87		67.73	106.25	109.91		87.98	108.37	79.8		60.03	78.34	50.22		62.09	98.49	51.69
Bradi1g05793		0.33	0	0		0	0.33	0.33		0	0	0.33		0.33	0	0		0.33	0	0		0	0.67	0
Bradi1g05794		13.49	7.04	13.64		13.1	10.26	3.26		6.57	14.88	12.15		9.83	5.42	6.58		10	7.41	13.15		4.41	8.33	2.23
Bradi1g05795		4	1	1		1.5	6	2.01		5.87	3	1.7		0.5	1.52	0		0	4	2.04		9	4.5	6
Bradi1g05796		3.2	2.13	3.47		2.23	3.16	4.24		0	2.63	1.05		1.05	6.48	0		6.4	3.15	2.15		0	2.07	0
Bradi1g05797		0	0	0		0	0.5	0		0	0	0		1	0	0.33		0.33	0	0		0	0	0.33
Bradi1g05799		146.63	244.45	94.82		244.22	253.87	163.63		202.04	277.63	215.64		255.19	203.89	254.94		118.14	446.63	232.2		379.14	225.39	374.67
Bradi1g05801		34620.4	28371	26842.1		16971.7	16420.2	15134.1		20064.1	17591.6	22801.5		14964.7	15996.4	14089.4		19795.8	10098.6	12473		8096.57	13405.9	7697.52
Bradi1g05804		3537.99	2346.98	2618.98		1731.99	1795.98	1755.99		2002	1425	2076.98		1173.23	1647.97	1267.98		1609.99	657.99	866.99		724	1231.98	822
Bradi1g05805		0	0	0		0	0	0		0	0	0		0	0	0		0	0	0		0	0	0
Bradi1g05807		0	0	0		0	0	0		0	0	1.13		0	0	0		1.07	0	0		0	0	0
Bradi1g05808		0	0	0		0	0	0		0	0	0		0	0	0		0	0	0		0	0	0
Bradi1g05810		249	196	204		234	254	309		364	444	393		372	341	359		344	442	342		359	307	352
Bradi1g05811		0	2	1		0	2	0		0	0	0		0	2	1		1	1	4		1	1	1
Bradi1g05813		249	211	300		301	274	222		234	242	259		77	113	88		140	162	174		90	93	85
Bradi1g05817		338	376	455		702	613	519		367	340	356		101	94	72		81	77	69		36	35	35
Bradi1g05827		0	0	0		0	0	0		0	0	0		0	0	0		0	0	0		0	0	0
Bradi1g05837		0	0	0		0	0	0		1	1	0		1	0	0		1	0	0		0	3	0
Bradi1g05850		1	2	2		4	1	2		8	4	3		4	4	0		0	0	2		1	3	4
Bradi1g05860		0	0	1		3	1	0		1	2	1		0	2	5		3	0	7		4	4	9
Bradi1g05870		335	359	436		348	409	345		1066	995	847		1225	1155	1115		591	609	707		864	825	899
Bradi1g05880		766	862	687		545	496	543		807	748	480		2705	2540	2951		2677	2701	2886		1676	1702	1786
Bradi1g05885		60	43	55		62	58	58		46	42	55		52	49	52		72	63	49		42	45	48
Bradi1g05890		383	482	288		1590	1515	1547		1346	1670	1196		1060	974	1029		570	812	734		237	216	291
Bradi1g05895		15	25	18		42	40	43		47	59	29		30	31	27		25	23	27		10	9	7
Bradi1g05900		1	1	0		1	2	0		4	6	0		1	0	0		0	1	3		0	0	1
Bradi1g05910		1	0	0		0	1	0		0	0	0		0	0	0		0	0	0		0	0	0
Bradi1g05920		14	13	18		14	10	14		8	9	10		10	11	16		10	7	10		2	7	13
Bradi1g05930		0	0	0		0	0	0		0	0	0		0	0	0		0	0	0		0	0	0
Bradi1g05941		0	0	0		0	0	0		1	0	0		0	0	0		0	0	0		2	0	4
Bradi1g05950		1798	1941	1936		2256	2161	2188		2132	2254	2165		2225	2129	2310		2451	3003	2597		3371	2913	3372
Bradi1g05960		8	5	7		4	7	3		2	3	2		7	7	2		8	7	11		10	5	7
Bradi1g05970		1091	984	1248		1030	1091	1079		1032	959	1206		1359	1396	1327		1516	1548	1426		1519	1441	1664
Bradi1g05980		466.62	476.83	475.76		294.41	326.77	352.1		402.6	354.69	398.82		541.58	497.45	456.1		635.18	482.45	619.76		575.15	664.76	516.41
Bradi1g05983		0	0	0		0	1	0		0	0	0		0	0	0		0	0	0		0	0	0
Bradi1g05987		0	0	0		0	0	0		0	0	0		0	0	0		0	0	0		0	0	0
Bradi1g05990		0	0	0		0	0	0		0	0	0		0	0	0		0	0	0		0	0	0
Bradi1g05996		129.38	129.17	128.24		98.59	124.23	97.9		127.4	104.31	121.18		159.42	177.55	110.9		176.82	140.55	182.24		134.93	111.66	109.59
Bradi1g06002		0	0	0		0	0	0		0	0	0		0	0	0		0	0	0		0	0	0
Bradi1g06010		0	0	0		0	0	0		0	0	0		0	0	0		0	0	0		0	0	0
Bradi1g06020		5	2	0		3	2	3		2	1	1		1	1	1		1	1	0		6	4	3
Bradi1g06030		698	588	782		621	843	617		420	571	589		154	216	179		66	52	92		691	596	695
Bradi1g06036		1397	1329	1203		980	1042	1029		1179	1009	984		1097	1190	1026		1282	1097	1180		1095	1205	1141
Bradi1g06042		9	4	5		11	14	14		13	16	9		13	19	20		10	26	10		24	18	18
Bradi1g06050		261	247	319		430	416	365		193	213	146		37	41	38		19	39	37		48	67	51
Bradi1g06060		128	113	134		129	136	127		119	105	141		125	129	123		113	115	99		169	126	148
Bradi1g06070		714	728	795		736	702	759		806	802	848		1007	1036	980		834	883	897		938	825	846
Bradi1g06080		1040	761	1099		1006	1318	1073		1114	1164	1262		1157	1104	1273		2159	2400	1952		3566	3438	3752
Bradi1g06090		2581.16	2718.27	2305.93		2363.64	2333.72	2531.91		2921.53	2448.63	2359.25		3247.73	3290.41	3202.95		4847.64	4131.48	4235.81		2189.78	2404.32	2182.89
Bradi1g06095		1	1	0		0	3	1		1	1	2		2	1	4		2	0	1		3	1	3
Bradi1g06100		66.84	82.73	77.07		114.36	89.28	95.09		81.47	90.37	81.75		107.27	129.59	127.05		167.36	191.52	177.19		158.22	141.68	142.11
Bradi1g06110		924	825	1020		696	835	819		941	857	1005		1019.35	1167	1012		999	883	967.26		872	964	953
Bradi1g06122		179	157	189		137	131	153		161	132	160		129	135	125		183	166	153		124	144	125
Bradi1g06130		0	0	0		0	0	0		0	0	0		0	0	0		0	0	0		0	0	0
Bradi1g06140		0	0	0		0	0	0		0	0	0		0	0	0		0	0	0		0	0	0
Bradi1g06150		1	0	0		0	0	0		0	1	0		0	0	0		0	0	0		0	0	0
Bradi1g06160		640	540	656		756	666	539		484	520	557		395	418	336		309	469	360		443	393	567
Bradi1g06170		0	1	0		0	0	0		0	0	0		0	0	0		0	0	0		0	0	0
Bradi1g06177		14.65	20.29	15.75		30.4	44.71	28.33		31.9	31.82	21.55		48.5	33.1	35.4		35.46	43.88	47.76		52.84	38.93	71.78
Bradi1g06190		931	729	1127		369	333	238		153	136	149		128	127	133		119	172	130		82	60	105.94
Bradi1g06200		172.35	203.71	194.25		297.6	297.29	219.67		272.1	210.18	217.45		434.5	311.9	398.6		735.54	1102.12	784.24		680.16	525.07	675.22
Bradi1g06210		0	0	0		1	0	0		0	0	1		0	0	0		0	0	1		0	0	2.06
Bradi1g06220		2845	2512	3215		2489	3336	2713		2823	2301	3094		2890	2720	2978		3422	3026	3093		3420	3276.63	3610
Bradi1g06222		0	0	0		1	1	0		1	1	0		0	1	3		0	0	1		0	2	0
Bradi1g06225		0	0	0		0	0	0		0	0	0		0	0	0		0	0	0		0	0	0
Bradi1g06230		18	15	16		15	16	19		10	14	23		28	23	37		49	55	44		47	37	38
Bradi1g06235		70	75	63		93	88	75		87	85	81		137	124	122		198	347	272		155	139	168
Bradi1g06241		10	9	9		40	13	17		21	12	16		14	26	15		20	23	18		8	7	10
Bradi1g06250		366	426	343		482	480	412		451	479	398		553	469	519		499	619	515		547	535	581
Bradi1g06260		356	473	393		904	998	915		689	768	575		453	411	391		236	273	295		197	251	192
Bradi1g06270		19	16	23		26	30	45		74	93	44		83	90	80		34	62	43		39	40	36
Bradi1g06280		68	56	88		69	83	63		61	66	39		45	63	54		21	8	20		100	91	135
Bradi1g06290		2616	3282	2453		2506	2497	2488		2412	2584	1798		1238	1258	1230		580	749	508		1112	1057	953
Bradi1g06300		2142	1969	2988		5390	5088	3939		2096	2148	1915		852	908	840		775	822	913		1166	1030	1113
Bradi1g06310		947	964	1000		1117	1211	1047		1046	1047	1043		1072	1179	1221		1438	1936	1616		1662	1487	1779
Bradi1g06315		0	0	0		1	1	0		2	1	0		2	0	2		0	6	5		7	1	3
Bradi1g06320		366	305	367		318	363	381		368	351	401		446	503	454		589	529	567		514	519	462
Bradi1g06330		15	24	11		5	15	13		26	17	14		11	11	10		9	7	7		12	12	11
Bradi1g06340		6737	5695	9297		7882	8345	7159		8800	8667	8037		4083	4371	4397		1884	2169	2267		4390	4093	4491
Bradi1g06350		13	16	20		17	12	17		11	11	15		15	12	16		14	16	15		32	31	38
Bradi1g06360		512	474	629		821	838	837		1015	994	1056		1022	1034	967		1335	1293	1351		768	760	665
Bradi1g06366		2340	2158	2953		2097	2583	2335		2477	2091	2812		2639	2802	2665		3145	2917	2876		2874	2999	2819
Bradi1g06372		1618	1403	2275		1684	1689	986		1143	1152	1116		394	367	422		282	584	507		127	148	165
Bradi1g06376		0	0	1		1	0	2		1	2	0		1	0	1		0	1	0		0	0	0
Bradi1g06380		573	608	705		673	665	684		744	817	943		1021	1060	1008		879	1009	916		937	804	973
Bradi1g06387		1738	1851	1923		1902	1887	1851		1801	1900	1948		1907	1848	2006		1961	2364	2098		2681	2452	2890
Bradi1g06400		26	28	31		23	32	35		23	27	37		23	30	26		40	47	36		61	36	32
Bradi1g06410		13	19	15		10	18	14		5	2	6		6	10	7		5	12	8		13	22	20
Bradi1g06420		401	456	330		257	346	299		206	205	254		239	303	262		245	264	303		1397	1535	1394
Bradi1g06421		0	0	0		0	0	0		0	1	0		0	0	0		0	0	0		0	0	0
Bradi1g06422		1	0	0		0	1	0		0	0	0		0	0	0		0	0	0		0	1	0
Bradi1g06425		4	1	0		0	1	0		1	0	0		0	0	2		1	1	0		12	17	11
Bradi1g06430		21993.1	17594.5	18513.3		22243.7	24325.5	21081.8		11878.9	12785	12623.5		7701.53	7075.19	7943.33		6401.26	7735.06	7409.93		53813.5	49034.4	50912.6
Bradi1g06435		9.9	2.53	3.68		9.33	6.52	9.16		4.12	3.99	5.53		5.47	7.81	2.67		2.74	3.94	4.07		39.53	17.56	39.36
Bradi1g06440		456	465	505		759	681	702		556	595	570		457	473	430		468	421	438		361	306	334
Bradi1g06451		1762	2326	2230		1167	1074	944		978	787	966		514	575	536		240	268	232		743	755	770
Bradi1g06460		2	4	1		3	7	2		4	3	3		6	6	5		9	14	8		2	6	4
Bradi1g06470		340	356.1	379		316.25	311.96	327.76		358.13	386.24	371.32		418.46	435.32	379		461	407	384.83		396.06	360.21	403.14
Bradi1g06480		1187	1168.9	1091		1027.75	1012.04	1049.24		1034.87	907.76	907.68		1231.54	1283.68	1229		1411	1738	1395.17		1482.94	1338.79	1509.86
Bradi1g06490		1083	1317	952		726	733	715		720	660	621		868	845	791		776	821	848		1617	1623	1573
Bradi1g06495		8	11	15		15	13	12		24	12	33		11	20	15		14	14	10		19	22	14
Bradi1g06500		0	0	0		0	0	0		0	0	0		0	0	0		0	0	0		0	0	0
Bradi1g06511		593	566	496		565	563	653		600	618	668		588	553	559		1012	929	895		784	746	708
Bradi1g06520		2051	1637	2523		1608	2038	1727		1845	1649	2298		1998	1914	1945		2537	2254	2237		2382	2272	2143
Bradi1g06530		55	28	47		48	75	47		63	56	73		81	96	96		69	89	63		107	100	126
Bradi1g06540		920.43	1004.68	846.67		1089.01	1133.98	1129.83		1012.1	1020.87	1035.04		1464.48	1436.1	1440.24		1956.03	2466.79	2105.26		2053.91	1721.23	2042.37
Bradi1g06550		151.57	166.32	146.33		89.99	87.02	69.17		143.9	119.13	111.96		92.52	109.9	119.76		96.97	83.21	78.74		93.09	103.77	83.63
Bradi1g06560		1119	1226	995		1013	1026	953		1646	1769	1278		701	712	625		365	453	382		669	624	608
Bradi1g06570		78	91	85		82	57	83		84	80	87		137	136	142		139	207	159		175	159	192
Bradi1g06580		1218	1267	1392		1204	1165	1311		1481	1361	1454		1786	1816	1821		2048	1936	1944		1317	1470	1383
Bradi1g06590		376	356	433		333	292	332		327	268	342		420	415	428		671	545	495		412	437	377
Bradi1g06601		0	0	0		0	0	0		0	0	0		0	0	0		0	0	0		0	0	0
Bradi1g06610		21	32	24		27	35	33		17	33	27		6	8	4		6	4	10		8	18	14
Bradi1g06620		783	869	765		895	664	763		570	574	586		593	604	617		652	618	595		906	948	854
Bradi1g06630		1000	1051	1115		1044	999	1130		1072	1133	1189		1370	1372	1382		881	856	966		747	798	801
Bradi1g06633		0	0	0		0	0	0		0	0	0		0	0	0		0	0	0		0	0	0
Bradi1g06636		0	0	0		0	0	0		0	0	0		0	0	0		0	0	0		0	0	0
Bradi1g06637		0	4	1		1	0	1		1	0	0		1	3	0		1	1	3		1	4	1
Bradi1g06638		0	0	0		0	0	0		0	0	0		0	0	0		0	0	0		0	0	0
Bradi1g06640		481	417	513		548	496	537		525	549	597		413	477	457		380	370	364		467	529	513
Bradi1g06645		0	0	0		0	0	0		0	0	0		0	0	0		0	0	0		0	0	0
Bradi1g06650		6	10	10		4	10	9		4	3	11		15	5	10		16	19	13		20	20	30
Bradi1g06660		5	3	9		10	5	4		6	9	4		5	6	7		7	11	3		5	4	9
Bradi1g06670		3045	3185	3031		2369	2209	2261		2183	2261	1831		2322	2125	2218		1862	1982	1614		1995	1895	2087
Bradi1g06678		298	286	276		225	233	236		193	184	178		90	134	132		40	42	36		60	72	45
Bradi1g06686		0	1	0		0	0	0		0	1	0		0	0	0		1	0	0		0	0	0
Bradi1g06691		3	8	2		1	2	6		1	0	2		1	1	0		0	1	0		1	0	0
Bradi1g06695		10571	11968	8381		5246	5183	4843		2384	2276	1328		367	334	304		5	10	6		56	57	52
Bradi1g06700		708	824	819		690	641	617		676	610	503		974	947	948		870	854	812		781	791	799
Bradi1g06710		0	0	0		0	0	1		0	0	0		0	1	1		0	0	0		0	0	0
Bradi1g06720		0	0	0		0	0	0		0	0	0		0	0	0		0	0	0		0	0	0
Bradi1g06730		24	39	33		23	18	21		17	20	20		63	40	73		30	38	31		15	32	25
Bradi1g06740		0	0	0		0	0	0		0	0	0		0	0	0		0	0	0		0	1	0
Bradi1g06750		1006	856	962		650	772	796		701	608	680		419	385	465		514	424	450		1483	1688	1641
Bradi1g06755		1501	1325	2154		1072	1320	1157		1551	1196	1815		1559	1509	1591		1744	1293	1478		1793	2028	1877
Bradi1g06760		42.96	65.96	34		57	61.97	62.96		55	36.92	58.92		56.82	60.9	45.73		65.69	67.88	66		52.53	52.87	48
Bradi1g06766		6.04	3.04	24		11	11.03	12.04		12	15.08	21.08		24.18	29.1	20.27		25.31	51.12	42		60.47	37.13	52
Bradi1g06772		996	620	1074		908	1103	1029		943	978	1186		517	465	459		319	270	302		1161	1309	1399
Bradi1g06780		246	299	268		296	287	326		256	265	270		390	365	347		354	317	329		221	239	238
Bradi1g06790		38	28	24		43	48	36		42	40	48		41	37	40		51	52	29		35	42	43
Bradi1g06800		2249	2102	2006		2171	2227	2286		2559	2730	2474		2557	2743	2672		1994	2229	2164		2275	2039	2165
Bradi1g06810		997	893	1029		942	1191	1023		1076	965	1288		1456	1407	1407		1518	1788	1577		1902	1664	1822
Bradi1g06821		5918	5678	5715		4928	4885	5415		5406	5126	5248		5615	5400	5355		5941	5045	5438		5088	5738	4987
Bradi1g06830		0	0	1		3	1	1		0	0	0		0	2	1		1	0	0		0	0	0
Bradi1g06840		0	0	0		1	2	0		0	0	1		0	0	0		1	0	0		1	0	0
Bradi1g06851		7573.17	6875.91	7637.66		8356.99	9768.46	8336.87		9449.95	9963.4	8283.58		10652.9	8375.13	10605.4		10497.7	12107.3	9616.5		9840.6	14032.6	14970.8
Bradi1g06861		17480.4	14859.5	21575.8		13563.8	16035	13891.3		16244.2	15531.8	15578.1		17776.1	14954.7	15208.7		20163.4	16828.8	14770.3		14721.4	22983.3	21545
Bradi1g06864		0	0	0		0	0	0		0	0	0		0	0	0		0	0	0		0	0	0
Bradi1g06867		15	13	8		5	7	13		5	5	7		13	4	3		14	11	12		39	43	33
Bradi1g06870		9841.72	8357.37	11374.1		8466.03	10664.1	8782.59		10435.1	9304.88	10916.3		11506.7	10558.9	11121.2		13011.4	12612.3	10450.9		11906.8	13799.6	14103.4
Bradi1g06880		1	0	0		0	0	0		0	0	0		0	1	0		0	0	0		0	0	0
Bradi1g06882		0	0	0		0	0	0		0	0	0		0	0	0		0	0	0		0	0	0
Bradi1g06884		1	0	1		1	2	1		2	4	2		1	0	2		1	3	1		2	4	5
Bradi1g06887		0	0	2		0	0	0		0	0	0		0	0	0		0	0	0		0	0	1
Bradi1g06890		15574.1	18164.7	13217		13371.7	14347.4	13415		12103.1	11798.9	8800.26		7168.33	6419.42	8555.37		6623.23	6202.41	8793.51		17933.6	19051.5	16458.5
Bradi1g06900		267.92	284.3	317.95		950.26	745.58	835.99		620.92	696.1	677.74		223.67	254.58	199.63		197.77	235.59	171.49		181.36	177.48	206.5
Bradi1g06902		0	0	0		0	0	0		0	0	0		0	0	0		0	0	0		0	0	0
Bradi1g06904		463	337	751		1534	1015	1233		944	807	1477		193	272	291		142	98	144		54	18	30
Bradi1g06907		730	753	687		1104	978	1058		938	1000	937		1044	980	1110		1068	1220	1058		571	558	630
Bradi1g06917		428	352	401		374	415	415		397	342	421		459	532	475		748	761	763		716	654	664
Bradi1g06930		474	386	517		346	357	387		319	288	400		394	439	385		474	460	482		635	829	710
Bradi1g06945		144	138	155		174	148	154		142	141	155		206	211	185		283	265	234		253	311	323
Bradi1g06960		3	1	1		5	1	2		0	0	1		2	1	5		0	0	2		6	0	1
Bradi1g06970		5	8	3		18	11	15		27	2	48		60	117	83		86	78	110		31	14	26
Bradi1g06980		290	359	322		298	448	311		466	387	620		203	169	204		423	309	339		149	188	152
Bradi1g06990		18	27	32		81	81	71		66	65	63		54	42	44		27	39	52		39	21	38
Bradi1g06997		24	16	17		20	21	23		27	20	22		28	24	23		40	47	57		60	48	68
Bradi1g06999		5.8	9.21	10.36		3.49	0	8.15		9.3	3.52	8.11		8.23	9.27	11.87		11.61	10.71	8.25		4.85	8.22	9.58
Bradi1g07001		303.2	204.79	221.64		92.51	107	128.85		133.7	92.48	107.89		157.77	224.73	224.13		300.39	225.29	202.75		156.15	232.78	161.42
Bradi1g07006		0	0	0		0	0	0		0	0	0		0	0	0		0	0	0		0	0	0
Bradi1g07010		216	166	189		163	171	150		134	121	103		133	111	134		78	108	133		712	669	674
Bradi1g07020		2504	2253	2682		2679	2661	2807		2778	2842	3126		3369	3514	3503		3285	3762	3347		3149	2969	3262
Bradi1g07027		971	865	828		1172	1240	1166		1332	1456	1270		1959	1869	2080		2268	3259	2892		1840	1618	1807
Bradi1g07035		81	90	68		115	136	170		143	233	107		72	107	82		93	78	75		76	99	94
Bradi1g07043		3	6	5		6	12	7		15	6	8		16	10	7		7	10	4		2	7	11
Bradi1g07051		0	0	0		0	0	0		0	0	0		0	0	0		0	0	0		0	0	0
Bradi1g07060		182	205	165		170	266	208		241	224	179		106	155	128		66	76	59		206	143	172
Bradi1g07070		1567	1442	1461		1445	1490	1492		1252	1251	1380		1861	1732	1875		2054	1865	1695		1541	1390	1503
Bradi1g07080		76	57	68		60	55	61		43	55	47		62	59	67		64	51	68		79	69	60
Bradi1g07090		14	6	16		18	30	24		28	15	33		36	33	46		64	82	70		46	47	37
Bradi1g07110		486	394	435		453	488	415		419	400	455		438	492	483		483	606	574		771	715	808
Bradi1g07120		1723	1357	1437		921	887	832		418	453	395		317	307	339		184	201	133		2842	3246	2819
Bradi1g07126		3	5	3		3	3	3		3	6	5		5	3	2		9	11	4		25	27	19
Bradi1g07133		1050	1047	1016		976	826	967		865	920	731		265	278	299		220	155	176		464	622	548
Bradi1g07140		2947	3205	2599		3401	3000	3195		2504	2666	2063		1325	1461	1626		1548	1482	1590		3028	2946	2947
Bradi1g07145		0	0	0		0	0	0		0	0	0		0	1	0		0	0	0		0	0	0
Bradi1g07150		3610	3212	3834		3212	3289	3521		3293	2915	3845		3563	3792	3637		4222	3380	3737		3316	3104	2910
Bradi1g07160		3874	3618	4001		3973	4788	4428		6490	7001	6276		9499	8809	9256		7398	8534	7839		5017	4562	4644
Bradi1g07170		22641	20128	22162		22106	24142	23266		16613	18695	19622		9728	8439	9704		5810	5970	6205		30862	31505	29891
Bradi1g07180		227	239	218		169	230	196		161	143	214		161	153	130		270	333	315		698	660	697
Bradi1g07185		6.16	12.88	6.9		7.08	4.62	4.7		13.26	3.59	4.58		8.97	4.96	4.49		8.33	2.32	8.66		24.58	22.18	23.17
Bradi1g07190		68.84	102.12	73.1		131.92	103.38	127.3		72.74	88.41	67.42		43.03	41.04	74.51		33.67	32.68	30.34		60.42	71.82	71.83
Bradi1g07195		0	0	0		0	0	0		2	0	0		1	1	0		0	0	0		0	0	0
Bradi1g07200		1421	1131	1676		2679	2617	2699		3677	3962	4089		3059	3142	3078		2527	2710	2377		1582	1337	1662
Bradi1g07210		1881	1587	2296		1315	1504	1664		1638	1419	2108		1976	1936	1837		2297	1621	1861		1488	1676	1473
Bradi1g07220		208	200	156		231	203	233		184	257	180		249	196	264		197	279	320		158	131	129
Bradi1g07222		0	0	0		0	1	0		1	0	3		4	0	1		1	0	2		2	2	0
Bradi1g07225		1	6	2		4	2	10		1	3	7		3	2	2		2	1	3		1	0	1
Bradi1g07230		4345	4232	5576		3671	3656	3630		4238	3570	4226		4851	4376	4575		4420	3669	3918		3035	3381	3221
Bradi1g07237		2274	2120	2554		3577	3348	3020		4194	4747	3987		4495	4336	4597		3148	3865	3568		1779	1549	1667
Bradi1g07247		2	2	2		1	3	1		2	2	0		5	3	1		4	8	4		3	0	3
Bradi1g07253		0	0	0		0	0	0		0	0	0		0	0	0		0	0	0		0	0	0
Bradi1g07260		0	1	0		0	0	0		0	0	0		0	0	0		1	0	0		0	1	0
Bradi1g07270		1	1	0		0	1	0		0	0	1		0	0	0		0	1	0		3	0	1
Bradi1g07277		1935	1432	2407		1758	1573	1112		1002	1029	1105		438	421	418		554	776	759		955	1117	989
Bradi1g07290		0	0	0		0	0	0		0	0	0		0	0	0		0	0	0		0	0	0
Bradi1g07300		22	20	33		20	25	12		23	13	20		22	42	31		44	28	30		28	29	27
Bradi1g07303		0	0	0		0	0	0		0	0	0		0	0	0		0	0	0		0	0	0
Bradi1g07306		0	0	0		0	1	0		0	0	0		0	0	0		0	0	0		0	0	0
Bradi1g07310		8	9	7		6	4	1		7	4	0		2	0	3		4	5	5		6	2	3
Bradi1g07320		471	418	445		422	415	374		411	396	404		519	592	564		616	609	586		531	558	565
Bradi1g07325		0	0	0		0	0	0		0	1	0		0	1	0		0	0	0		0	0	0
Bradi1g07330		292	294	266		278	290	221		396	425	358		338	296	302		254	292	220		105	133	112
Bradi1g07340		252	207	233		264	266	189		203	159	223		223	245	259		354	398	385		1121	982	1272
Bradi1g07350		15	17	13		27	25	12		14	18	34		4	6	11		11	7	13		4	10	9
Bradi1g07360		349	322	288		354	376	376		302	298	291		238	212	195		242	286	243		541	431	521
Bradi1g07370		2377	1680	2301		1606	1888	1823		1716	1513	1803		752	666	689		338	323	310		1746	2234	1761
Bradi1g07380		186	156	151		169	188	193		184	196	217		225	219	212		257	287	223		409	330	409
Bradi1g07390		80	100	81		61	57	73		68	78	78		76	63	68		66	63	55		94	99	114
Bradi1g07400		1172	1143	1415		1775	1909.52	2056.51		2812.44	2854.82	2941.83		3493.87	3322	3758		3352.57	2779.31	2997		1974	1575.67	1747.26
Bradi1g07410		66	55	68		63	112	94		195	297	251		140	148	167		77	70	75		96	40	62
Bradi1g07415		0	0	0		0	0	0		0	0	0		0	0	0		0	0	0		0	0	0
Bradi1g07420		11	11	16		3	2	4		2	1	1		3	2	4		0	3	7		5	3	2
Bradi1g07430		103	117	90		112	91	100		128	119	95		98	91	87		95	98	99		120	131	81
Bradi1g07441		2116	2241	2163		2589	1848	2031		2893	2801	2299		1804	1786	1769		1291	1265	1359		1346	1552	1339
Bradi1g07450		64	47	52		53	95	54		58	65	59		68	58	52		95	98	103		138	143	173
Bradi1g07457		32	19	15		46	31	19		22	32	30		16	9	12		4	9	10		15	21	13
Bradi1g07463		0	0	0		0	0	0		0	0	0		0	0	0		0	0	0		0	0	0
Bradi1g07470		1867	1603	1553		2245	2243	2122		1749	1944	2074		2068	2010	2238		1990	2263	2311		2342	2283	2383
Bradi1g07480		443	513	374		400	294	308		331	282	240		430	497	469		356	471	412		286	319	271
Bradi1g07490		299	262	276		286	311	285		269	258	300		318	304	323		489	421	415		365	369	371
Bradi1g07492		0	0	0		0	0	0		0	0	0		0	0	0		0	0	0		0	0	0
Bradi1g07495		79	87	85		63	66	51		94	68	62		108	102	84		647	677	653		226	170	180
Bradi1g07500		0	0	0		0	0	0		0	0	0		0	0	0		1	0	0		0	0	0
Bradi1g07511		6	5	6		9	13	7		2	4	13		9	5	1		5	7	14		11	6	9
Bradi1g07520		1534	1376	1848		1314	1453	1658		1756	1663	1900		2205	2385	2155		1904	1485	1650		1045	1077	1093
Bradi1g07530		3533	3563	3231		2656	2257	2368		1768	1560	1660		802	559	913		382	263	398		3895	4588	3492
Bradi1g07540		46	46	35		108	162	100		164	240	156		176	174	188		105	334	236		327	164	281
Bradi1g07550		1297	1126	972		1008	836	941		1168	1048	844		5579	4653	5562		15075	16757	16531		2957	2970	2905
Bradi1g07560		2157	1966	2134		1973	1933	1912		1541	1418	1713		832	827	758		532	458	457		1502	1425	1527
Bradi1g07562		0	0	0		0	0	0		0	0	0		0	0	0		0	0	0		0	0	0
Bradi1g07565		8	11	8		22	16	23		14	2	5		5	3	2		2	5	11		10	5	10
Bradi1g07570		1431	1499	1497		3674	3015	2708		2215	2596	2228		1387	1494	1488		1125	1526	1356		1024	892	1020
Bradi1g07577		363	333	356		387	361	395		416	429	439		350	440	400		408	464	424		337	324	347
Bradi1g07590		188	170	119		156	130	156		143	139	159		118	143	122		81	79	76		91	75	61
Bradi1g07600		0	3	1		1	1	0		1	7	1		2	2	3		1	0	1		3	1	1
Bradi1g07611		0	0	1		0	0	0		0	0	0		0	0	0		0	0	0		0	0	0
Bradi1g07620		1012	994	945		877	802	897		840	823	868		1064	1061	1029		1217	1177	1078		1072	1225	1142
Bradi1g07625		8	17	18		14	17	13		8	12	16		14	7	14		20	12	17		11	11	13
Bradi1g07630		1602	1470	1612		1034	967	1026		1105	987	1158		1258	1204	1358		1877	2045	1858		2296	2415	2470
Bradi1g07635		100	98	103		74	71	60		82	83	96		112	80	68		124	121	98		62	107	85
Bradi1g07640		303	321	253		335	271	287		237	211	209		249	220	229		428	419	384		296	344	366
Bradi1g07650		777	797	802		2315	1919	2045		1458	1617	1564		920	1041	1056		1231	1417	1291		949	844	971
Bradi1g07655		1	0	0		0	0	0		0	0	0		0	0	0		0	0	0		0	1	1
Bradi1g07660		1960	1739	1981		616	943	520		834	857	710		437	327	459		324	563	287		180	99	176
Bradi1g07665		0	0	0		0	0	0		0	0	0		0	0	0		0	0	0		0	0	0
Bradi1g07670		9	1	20		59	28	47		16	0	50		14	50	30		29	25	45		61.11	3	20
Bradi1g07680		18	31	27		26	24	25		13	21	40		33	36	36		24	36	26		7	14	9
Bradi1g07683		0	0	0		0	0	0		0	0	0		0	0	0		0	0	0		0	0	0
Bradi1g07686		0	0	0		0	0	0		0	0	0		0	0	0		0	0	0		0	0	0
Bradi1g07693		30	25	34		34	25	26		70	58	47		48	32	39		40	47	49		34	30	25
Bradi1g07700		163	184	209		122	230	268		225	140	174		100	81	105		84	147	128		232	142	238
Bradi1g07710		304	322	292		285	319	311		291	310	267		378	380	385		565	630	497		419	520	487
Bradi1g07717		441	415	437		407	442	387		476	424	472		624	632	644		801	837	727		792	729	816
Bradi1g07737		0	0	0		0	1	0		0	0	0		0	0	0		0	0	0		0	0	0
Bradi1g07750		329	303	352		282	331	348		324	255	333		385	371	379		453	434	459		396	414	436
Bradi1g07760		14	9	6		7	7	6		17	10	7		20	13	16		16	23	10		31	17	20
Bradi1g07770		69	78	101		55	79	65		50	63	47		22	33	25		29	23	28		9	20	18
Bradi1g07780		43	47	49		28	39	30		52	62	48		57	67	65		44	32	38		19	25	17
Bradi1g07790		3	5	9		11	7	9		25	10	13		50	71	53		62	69	59		54	40	59
Bradi1g07797		45	50	62		32	26	43		37	36	38		52	67	61		95	104	91		149	173	138
Bradi1g07810		1089	1048	1081		1103	1060	1072		1087	1078	1207		1320	1324	1326		1236	1399	1310		1355	1309	1361
Bradi1g07820		129	96	176		140	154	135		190	172	195		201	245	215		215	217	213		242	234	229
Bradi1g07830		309	295	298		325	283	325		281	298	278		244	268	305		247	259	227		278	228	279
Bradi1g07840		363	347	278		467	466	419		456	397	381		258	228	229		367	462	447		746	658	658
Bradi1g07850		20	18	27		15	41	25		32	58	47		34	33	53		64	81	56		62	65	84
Bradi1g07860		115	93	129		171	189	161		159	110	149		165	123	132		193	171	181		164	172	187
Bradi1g07870		1565	1223	2123		1145	912	838		624	652	669		487	498	527		532	820	884		775	1186	893
Bradi1g07880		194	161	265		341	261	258		240	244	244		119	98	99		181	106	131		187	239	225
Bradi1g07885		0	1	0		0	0	2		0	0	0		0	0	0		0	0	0		0	0	0
Bradi1g07890		3	5	12		7	10	11		3	4	1		2	0	1		0	1	5		0	2	4
Bradi1g07900		0	0	0		0	0	0		0	0	0		0	0	0		0	0	0		0	0	0
Bradi1g07910		467	477	472		560	486	494		586	505	667		575	561	595		706	619	600		533	546	614
Bradi1g07920		319	282	299		302	322	360		337	293	363		464	421	439		357	383	416		299	333	335
Bradi1g07930		1814	1366	1401		1267	1136	820		959	694	1070		721	635	689		991	1001	978		1557	1511	1518
Bradi1g07936		6	10	9		10	12	9		18	20	13		16	17	21		14	23	25		25	20	23
Bradi1g07942		0	0	0		1	0	0		0	0	0		2	0	0		0	1	0		0	2	0
Bradi1g07950		19	29	27		9	20	17		19	29	21		43	48	27		30	40	35		43	40	44
Bradi1g07960		627	758	923		893	887	882		655	861	855		207	189	144		287	233	277		1141	1084	1033
Bradi1g07970		0	1	0		0	0	0		0	1	0		1	0	1		0	0	0		0	0	0
Bradi1g07980		1113	832	1111		1014	1278	1159		938	880	1227		574	488	596		388	380	390		2001	2014	2166
Bradi1g07991		49	41	51		26	38	30		33	29	41		47	56	55		38	47	31		36	46	67
Bradi1g08000		811	706	928		826	962	822		972	974	952		947	926	940		917	1316	1053		1268	1039	1213
Bradi1g08010		5	8	5		4	1	2		6	10	6		1	1	5		0	5	2		9	0	5
Bradi1g08020		1061	864	1141		870	919	888		866	907	1118		1116	1272	1138		1438	1314	1332		1077	1126	1125
Bradi1g08025		26	32	27		14	24	22		37	39	29		40	52	48		38	44	36		36	47	43
Bradi1g08030		7	6	8		5	0	1		10	3	3		21	14	26		31	39	41		15	32	31
Bradi1g08040		544	491	576		446	409	404		462	345	432		606	621	616		915	725	746		576	724	711
Bradi1g08050		0	1	0		0	0	0		0	0	0		0	0	0		0	3	0		2	1	0
Bradi1g08060		484	455	472		525	559	460		371	452	384		373	341	400		473	564	493		633	520	590
Bradi1g08070		524	435	671		674	861	692		548	795	842		275	297	321		177	223	236		443	292	440
Bradi1g08075		0	0	0		0	0	0		0	0	0		0	0	0		0	0	0		0	0	0
Bradi1g08080		297	315	330		324	346	338		383	424	413		349	382	400		380	390	413		364	323	348
Bradi1g08095		0	0	0		0	0	0		0	0	0		0	0	0		0	0	0		0	0	0
Bradi1g08106		291	217	374		356	318	294		116	139	149		146	123	126		171	181	118		122	122	104
Bradi1g08113		0	1	1		0	0	0		0	0	1		0	0	0		0	0	0		0	0	0
Bradi1g08120		13401	12708	19107		26594	26970	23175		27349	30392	27390		7323	7432	7421		3026	3724	3669		3081	2596	2904
Bradi1g08130		245.3	213.61	251.83		246.37	237.11	247.77		198.33	162.64	152.95		78.87	98.76	74.61		64.04	56	50.16		68.31	76.75	42.55
Bradi1g08135		21.87	26.53	17.34		24.74	14.99	16.29		13.8	16.65	14.19		9.13	3.54	1.51		3.06	1	0		1.79	1.37	6.45
Bradi1g08140		45	49	33		93	35	27		49	17	23		33	7	23		65	65	65		7	14	6
Bradi1g08142		174	172	170		203	210	199		245	211	202		210	224	234		168	209	225		143	171	154
Bradi1g08145		47	58	15		59	28	31		44	23	21		161	121	132		265	258	254		37	39	23
Bradi1g08150		5	3	3		2	8	4		6	9	3		31	26	31		29	57	58		10	9	4
Bradi1g08157		34	23	20		19	25	17		23	13	10		18	21	13		30	29	36		110	122	117
Bradi1g08170		0	0	0		0	0	0		0	0	0		0	0	2		0	0	0		0	0	0
Bradi1g08177		5	0	4		3	4	3		9	2	8		4	3	0		5	7	3		2	12	7
Bradi1g08183		2	1	5		2	0	0		0	0	0		0	0	0		0	0	0		0	0	0
Bradi1g08190		3381	3027	2934		2635	2304	2660		2228	1780	1798		2816	2448	2775		1585	1429	1391		998	1149	931
Bradi1g08201		2425	2334	2830		1861	1832	2020		2226	1954	2334		2537	2588	2387		2639	1898	2264		1632	1906	1697
Bradi1g08210		68	72	89		94	118	88		66	62	87		88	114	100		108	120	99		192	211	248
Bradi1g08217		731	649	682		713	633	733		683	726	734		929	919	959		864	879	822		891	923	859
Bradi1g08230		17	21	21		22	8	16		4	10	6		1	2	0		4	1	3		1	1	3
Bradi1g08236		29	42	36		41	66	45		47	57	54		62	37	54		66	79	77		92	69	92
Bradi1g08240		586	590	572		1339	1322	1204		1416	1594	1489		1138	1124	1209		758	1223	983		1036	742	1035
Bradi1g08250		0	0	0		0	0	0		0	0	0		0	0	0		0	0	1		0	0	0
Bradi1g08260		1536	1370	1738		1256	1595	1503		1478	1481	1735		1903	1670	1844		1876	1722	1806		1756	1880	1729
Bradi1g08270		121	159	193		399	384	364		470	519	557		235	225	261		98	106	120		98	57	91
Bradi1g08280		474	422	515		429	554	469		487	564	493		541	517	467		496	435	499		853	956	1018
Bradi1g08287		320	279	342		315	347	331		421	501	449		432	461	456		408	475	410		461	400	448
Bradi1g08290		0	0	0		1	1	0		0	1	3		1	0	1		0	1	2		4	1	1
Bradi1g08294		177	205	146		248	208	202		189	173	170		197	166	172		259	270	247		309	269	292
Bradi1g08301		669.68	698.1	789		850.09	757.73	787		1001.84	1067.75	1124		908.62	977.85	956.57		1033.94	1044.59	897.92		552.38	505.05	624.38
Bradi1g08310		3769.15	3868.75	3866.82		3413.8	3797.16	3525.94		2597.03	3245.96	2833.86		986.38	1101.85	1037.31		519.96	537.41	517.92		1225.53	1081.83	1113.62
Bradi1g08320		233	155	226		198	235	186		298	231	324		321	362	313		308	259	266		322	315	303
Bradi1g08326		0	0	0		0	0	0		0	0	0		0	0	0		0	0	0		0	0	0
Bradi1g08333		0	0	0		1	0	0		0	0	1		0	0	0		0	0	0		0	0	0
Bradi1g08340		0	0	1		1	2	0		3	0	0		0	1	0		0	1	4		1	0	1
Bradi1g08350		947	987	859		988	869	1003		968	879	944		1076	1006	1041		1250	1428	1197		1014	940	1130
Bradi1g08357		1774	1562	1314		1188	1085	1340		1030	671	688		1052	884	905		1718	2201	2099		10575	12235	9858
Bradi1g08363		1.11	2.9	0		0	0	1.11		0	0	0		0	0	0		0	0	0		0	2.3	0
Bradi1g08370		513.89	528.1	468		449	453	478.89		500	468	446		317	379	307		453	443	453		783	807.7	788
Bradi1g08380		525	459	498		838	786	881		836	1010	937		721	742	700		931	868	837		581	576	618
Bradi1g08390		61	66	34		65	62	56		36	41	53		54	49	51		50	89	83		81	99	76
Bradi1g08400		1505	1503	1420		1313	1364	1320		1278	1139	1130		1558	1589	1704		2062	2682	2311		2253	2051	2559
Bradi1g08403		0	0	0		0	0	0		0	0	0		0	0	0		0	0	2		0	1	0
Bradi1g08406		0	0	0		2	0	0		0	0	0		0	0	1		0	0	0		0	0	0
Bradi1g08410		887	1036	1106		732	765	771		841	901	899		1534	1341	1423		869	876	854		343	342	316
Bradi1g08415		0	0	0		0	0	0		0	0	0		0	0	0		0	0	0		0	0	0
Bradi1g08421		4415.96	4390.86	4543.3		4320.48	4981.52	5173.27		5228.85	5074.53	4371.4		3993.38	3726.69	3326.09		1669.41	2288.83	1800.52		2243.59	2186.6	2412.68
Bradi1g08430		27.04	31.14	26.7		48.52	36.48	39.73		22.15	35.47	40.6		25.62	24.31	29.91		21.59	46.17	37.48		39.41	25.4	66.32
Bradi1g08436		0	0	0		0	0	0		0	0	0		0	0	0		0	0	0		0	0	0
Bradi1g08440		853	826	993		744	727	783		746	782	826		941	856	925		1333	1113	1146		996	1065	1132
Bradi1g08451		0	0	0		0	0	0		1	0	0		0	0	0		0	0	0		1	0	0
Bradi1g08460		96	105	129		116	134	155		167	137	178		205	190	201		226	222	239		138	114	127
Bradi1g08470		998	1004	1078		966	931	1031		1060	1105	1220		1273	1098	1261		1313	1549	1274		1247	1182	1325
Bradi1g08480		2438	2074	2695		2160	2482	2307		1851	2088	2144		864	840	791		548	572	611		2128	2010	1800
Bradi1g08490		336	406	305		392	339	372		392	313	283		562	399	459		465	422	434		486	617	465
Bradi1g08500		22	22	28		19	24	13		22	14	37		23	23	21		35	37	39		47	50	46
Bradi1g08505		0	0	13		2.25	3	12.2		1.24	0	12.4		4	10.18	7.22		17	7	6.03		17.88	0	5
Bradi1g08510		185	150	183		153	163	164		193	143	209		221	222	263		270	293	261		252	246	274
Bradi1g08517		112	158	91		92	91	122		116	116	94		126	112	105		214	182	239		124	165	143
Bradi1g08521		1	0	0		1	0	0		0	0	0		3	0	0		0	0	1		1	1	0
Bradi1g08525		0	0	0		0	0	0		0	0	0		0	0	0		0	0	0		0	0	0
Bradi1g08530		88	55	125		61	99	57		91	58	86		76	74	51		102	89	78		91	99	123
Bradi1g08540		182	185	182		192	183	171		153	141	154		181	178	184		206	209	205		272	260	284
Bradi1g08545		4	2	6		5	1	9		6	4	1		4	4	7		8	8	4		3	1	3
Bradi1g08550		1833	1507	878		1516	958	1264		1338	1302	738		4139	2844	3928		8599	11254	9456		1427	1377	1556
Bradi1g08560		46	31	38		47	40	39		33	43	37		60	46	62		75	89	67		91	97	102
Bradi1g08570		5040	5152	5469		5017	5191	4665		4582	4804	4322		5935	6104	6035		9822	12076	10859		5468	4983	5704
Bradi1g08580		0	0	0		0	0	0		0	0	0		0	0	0		0	0	0		0	0	0
Bradi1g08587		0	0	0		0	0	0		0	0	0		0	0	0		0	0	0		0	0	0
Bradi1g08597		646	798	815		1250	914	932		876	960	936		649	603	634		418	507	467		262	280	317
Bradi1g08607		324	303	334		367	411	392		380	432	443		528	521	504		512	650	522		753	573	743
Bradi1g08620		324	311	333		438	400	388		474	444	409		459	465	435		477	539	488		398	355	451
Bradi1g08627		78	88	80		69	54	63		87	71	66		111	96	124		162	145	151		66	53	57
Bradi1g08639		0	2	4		1	1	3		3	2	1		4	3	2		5	5	5		3	7	2
Bradi1g08649		1	1	3		0	1	4		1	4	0		3	3	2		0	1	7		4	4	4
Bradi1g08660		352	318	340		345	365	365		421	432	438		451	482	532		504	513	470		503	491	524
Bradi1g08665		3	4	4		12	15	14		7	17	11		10	23	17		5	22	27		37	12	22
Bradi1g08670		0	0	0		0	0	0		0	0	0		0	0	0		0	0	0		0	0	0
Bradi1g08680		445.01	268	342.3		317.24	382.66	272.66		280.19	218.94	209.42		261.11	159.44	163.38		266.85	228	251		1044.51	1535.61	1264.9
Bradi1g08690		1254.37	1236.89	1110.39		1095.13	973.75	1092.76		1087.35	1080.37	1052.18		1323.5	1322.14	1227.93		1513.29	1450.52	1378.77		1361.26	1517.08	1477.76
Bradi1g08697		0	0	0		0	0	0		0	0	0		0	0	0		0	1	0		0	0	0
Bradi1g08703		0	0	2		0	0	0		0	0	0		0	0	2		0	0	0		1	0	1
Bradi1g08710		335	378	401		391	505	487		407	505	439		232	271	246		228	315	332		558	388	478
Bradi1g08718		431	393	484		286	376	303		239	178	262		183	179	217		312	326	288		963	1014	868
Bradi1g08727		604	556	680		524	513	482		491	574	615		685	704	653		825	933	768		857	794	900
Bradi1g08740		0	0	0		0	0	0		0	0	0		0	0	0		0	0	0		0	0	0
Bradi1g08745		0	0	0		1	0	0		0	0	0		0	0	0		0	0	0		0	0	0
Bradi1g08750		1	0	0		0	1	0		0	0	0		0	0	0		0	0	1		0	0	0
Bradi1g08760		1375	1306	1468		1669	1602	1613		1935	1860	2005		3928	4151	4008		2622	2619	2482		1528	1458	1632
Bradi1g08772		0	0	0		0	0	0		0	0	0		0	0	0		0	0	0		0	0	0
Bradi1g08780		278	247	285		201	228	222		236	270	280		734	706	663		506	504	420		341	311	359
Bradi1g08790		2	5	0		7	2	5		4	6	8		1	2	3		0	1	2		2	3	1
Bradi1g08800		18	13	16		24	18	15		5	1	9		9	2	8		2	3	3		0	7	1
Bradi1g08810		345	284	383		277	365	309		266	261	342		406	289	313		417	452	408		439	426	507
Bradi1g08820		683	815	670		819	855	998		731	818	638		905	819	908		1100	912	917		1879	1798	1768
Bradi1g08830		333	289	259		228	248	276		270	276	263		398	387	452		408	519	448		443	432	456
Bradi1g08840		76	63	96		90	110	100		117	84	114		111	147	129		137	165	177		226	220	258
Bradi1g08847		220	211	233		216	226	222		173	200	263		228	234	241		269	306	282		328	332	361
Bradi1g08860		2535.36	2558.9	2635		2419.97	2608.43	2624.66		2975.4	2776.84	2910.1		3254.03	3247.12	3120.5		3043.74	2857.15	3104.76		4828.62	5516.97	4705.41
Bradi1g08865		0	1	0		0	0	0		0	0	0		0	0	0		0	0	0		0	0	1
Bradi1g08870		88	97	121		153	144	142		195	142	147		151	141	140		65	63	74		64	54	63
Bradi1g08871		0	0	0		0	0	0		0	0	0		0	0	0		0	0	0		0	0	0
Bradi1g08872		38	59	34		34	38	33		37	51	35		64	47	61		71	90	66		53	79	62
Bradi1g08873		0	0	0		0	0	0		0	0	0		0	0	0		0	0	0		0	0	0
Bradi1g08875		0	0	0		3	1	7		2	3	3		6	3	4		2	2	4		1	0	0
Bradi1g08880		21	15	16		22	16	14		13	14	13		33	24	29		26	17	24		20	19	13
Bradi1g08891		30	30	119		22	21	17		15	19	7		8	7	9		2	3	6		4	3	8
Bradi1g08900		2046	2072	2446		2001	2136	1994		2475	2279	2591		3955	4194	3761		3694	3399	3527		2488	2425	2434
Bradi1g08907		3176	2911	2876		2890	2679	2717		1528	1731	1612		756	812	812		137	117	181		313	348	302
Bradi1g08917		493	500	444		713	690	549		547	636	630		494	543	540		425	685	489		664	514	738
Bradi1g08930		8023	7574	9276		7757	7969	8058		8392	8104	8061		11818	11142	11520		12938	11829	12517		12087	11519	11105
Bradi1g08940		63	50	45		59	97	78		55	55	63		86	92	93		102	141	127		116	80	145
Bradi1g08950		28.33	25.9	48.59		22.11	28.24	25.95		27.98	20.82	32.09		38.15	56.59	58.35		64.72	88.93	63.98		74.77	73.64	70.04
Bradi1g08960		12.67	12.1	16.41		5.89	12.76	17.05		11.02	9.18	16.91		14.85	13.41	3.65		29.28	19.07	19.02		8.23	20.36	11.96
Bradi1g08977		473	450	489		554	510	535		638	617	671		683	712	776		745	1052	880		863	780	864
Bradi1g08982		0	0	0		0	0	0		0	0	0		0	0	0		0	0	0		0	0	0
Bradi1g08988		69	97	73		218	300	290		252	290	257		173	204	198		259	305	272		217	122	211
Bradi1g09000		80	87	58		172	192	181		243	274	250		263	309	259		239	404	348		381	194	259
Bradi1g09010		12	13	19		39	44	30		13	18	23		2	6	5		3	7	8		8	25	9
Bradi1g09020		1	0	2		0	0	0		0	0	0		0	0	0		0	0	1		0	0	0
Bradi1g09030		4438	5593	3394		7902	4961	4527		9082	10389	3672		2653	2891	4040		2496	2974	2813		885	869	1487
Bradi1g09042		249	209	330		365	421	477		490	505	592		295	280	262		298	293	310		190	151	161
Bradi1g09050		25	34	56		66	78	77		56	59	57		63	58	74		83	102	78		144	112	161
Bradi1g09065		2088	2115	2281		1742	1891	1924		2219	2156	2418		2754	2626	2798		3302	2649	2887		1891	2120	1848
Bradi1g09080		50	28	42		52	44	46		53	66	88		102	100	102		112	125	104		114	92	97
Bradi1g09090		56	66	67		57	46	55		46	42	54		59	75	56		93	58	79		90	96	108
Bradi1g09100		163	187	168		218	207	210		210	246	245		308	313	308		296	430	292		406	324	414
Bradi1g09110		19.07	0	24.04		16.05	25.16	46.14		12.06	2	48.12		30.24	34.16	33.19		25.06	47.35	66.39		98.7	0	28.13
Bradi1g09120		555	635	615		783	823	820		895	820	900		747	681	748		719	749	670		611	585	629
Bradi1g09130		0	0	0		0	0	0		0	0	0		0	0	0		0	0	0		0	0	0
Bradi1g09133		1	0	1		4	1	0		3	1	1		0	3	2		3	2	3		4	4	5
Bradi1g09134		3	1	1		5	1	1		5	3	4		1	2	2		1	3	1		0	1	2
Bradi1g09136		4	12	7		5	12	6		7	10	14		9	5	3		6	6	6		9	9	12
Bradi1g09140		93	89	96		111	123	112		84	65	62		78	74	67		98	94	103		143	145	153
Bradi1g09150		1091	1127	1238		1251	1040	1135		1021	1141	1044		684	655	645		680	712	768		745	818	736
Bradi1g09160		0	0	0		0	0	0		0	0	0		0	0	0		0	0	0		0	0	0
Bradi1g09170		744	729	810		599	573	600		470	413	553		466	464	467		568	608	630		633	709	704
Bradi1g09171		0	0	0		0	0	0		0	0	0		1	0	0		0	0	0		0	0	0
Bradi1g09173		95	100.44	100		126.28	100.46	118.64		96.68	110.5	103		135.96	129.85	113.87		125.97	128.94	136.9		173.92	150.97	153.93
Bradi1g09177		2478	2862.56	1912		1380.72	876.54	665.36		493.32	553.5	436		86.04	118.15	101.13		77.03	90.06	104.1		113.08	70.03	91.07
Bradi1g09187		174	179	195		214	182	228		176	144	175		213	200	205		353	307	323		153	174	177
Bradi1g09200		264	247	266		269	322	270		308	334	392		333	301	358		370	481	366		418	303	462
Bradi1g09210		181	193	215		210	160	221		197	216	242		183	198	184		230	233	228		220	215	246
Bradi1g09216		0	0	0		0	0	0		1	0	0		3	1	1		0	0	0		0	0	0
Bradi1g09220		1	0	0		1	0	0		0	0	1		0	1	1		1	0	0		1	1	0
Bradi1g09225		0	0	0		0	0	0		0	0	0		0	0	0		0	0	0		0	0	0
Bradi1g09230		3	2	3		5	4	1		8	9	4		13	6	7		1	2	4		2	3	3
Bradi1g09240		611	339	782		722	1129	691		956	973	1169		66	88	113		37	40	60		396	206	345
Bradi1g09243		0	0	0		0	0	0		0	0	0		0	0	0		0	0	0		0	0	0
Bradi1g09246		132	157	156		244	361	327		396	422	458		177	200	230		149	126	207		191	139	207
Bradi1g09250		0	2	0		0	0	0		0	0	1		0	0	0		0	0	0		0	0	0
Bradi1g09260		0	0	0		0	0	0		0	0	0		0	0	0		0	0	0		0	0	0
Bradi1g09270		0	1	0		0	0	0		0	1	1		3	3	5		7	5	6		6	7	20
Bradi1g09280		0	0	0		0	0	0		0	0	0		0	0	0		0	0	0		0	0	0
Bradi1g09290		9	7	2		13	15	17		10	19	16		17	19	24		15	28	16		28	15	16
Bradi1g09300		38046	31547	36593		38162	41416	38851		29404	30250	31115		15533	13755	16766		13535	14811	13455		57316	52644	55751
Bradi1g09310		140	158	140		292	293	289		286	358	292		364	374	448		362	794	503		759	410	781
Bradi1g09320		145	126	181		187	157	128		142	136	163		182	166	154		293	297	261		268	267	251
Bradi1g09327		664	759	806		685	672	644		787	826	921		874	944	881		925	896	901		800	726	762
Bradi1g09340		800	874	958		931	979	898		1007	1024	1178		1120	1182	1140		963	1031	998		1035	929	1107
Bradi1g09350		191	211	258		489	425	542		1087	1142	1063		587	516	529		509	574	493		239	204	194
Bradi1g09357		307	285	238		352	309	311		330	293	314		335	374	405		329	571	433		737	585	820
Bradi1g09369		666.97	638	720		721.92	726.76	698.95		776.89	825.95	921.91		812.69	929.86	917.86		944.93	893.36	861.79		596.79	680.96	584.74
Bradi1g09370		270.03	214	273		241.08	233.24	253.05		233.11	199.05	278.09		287.31	285.14	257.14		439.07	380.64	410.21		306.21	347.04	355.26
Bradi1g09382		2	5	1		0	2	2		2	1	3		2	2	2		0	8	1		4	7	5
Bradi1g09390		381	353	396		434	469	423		417	429	509		613	625	630		884	999	787		841	736	904
Bradi1g09400		2958	2348	2224		2346	2117	2298		1926	1674	1619		3717	3541	4145		5011	5557	5205		5077	5162	5165
Bradi1g09410		9929	9914	8252		8161	8222	8365		7648	8029	6985		3992	3616	2764		1114	1143	999		3061	3229	3087
Bradi1g09415		0	1	0		1	0	0		0	0	0		0	0	0		0	0	0		0	0	0
Bradi1g09420		551	669	619		623	583	604		608	467	511		501	429	379		453	462	475		442	423	390
Bradi1g09431		148	160	98		107	99	90		77	67	85		134	79	131		128	158	163		459	441	398
Bradi1g09440		4	11	5		5	5	6		3	5	5		8	10	9		5	12	10		11	13	8
Bradi1g09450		348	284	341		346	432	318		291	261	358		278	226	246		331	321	328		1220	1279	1373
Bradi1g09455		3.01	0	0		2.01	3.02	3.02		0	0	2.01		1.01	2.01	2.01		0	1.02	0		1.01	2	3.03
Bradi1g09460		5976.99	6754	5548		6548.99	7135.98	6447.98		5046	5471	4704.99		2230.99	2834.99	2652.99		1485	1825.98	1405		3488.99	3040	3100.97
Bradi1g09470		2	2	1		2	6	4		4	6	6		12	3	11		12	15	12		16	12	21
Bradi1g09480		0	1	0		0	0	0		0	0	0		0	0	0		0	0	0		0	0	0
Bradi1g09487		5354	5102	5219		4544	3441	4519		7766	7852	6179		24566	25984	24402		39109	33857	39769		15624	17994	16301
Bradi1g09500		1	0	0		13	16	8		11	16	4		0	0	0		0	0	0		0	0	0
Bradi1g09507		900	842	952		759	919	731		850	746	883		1061	1008	939		1493	1503	1511		1588	1589	1567
Bradi1g09513		82	116	94		81	64	76		76	68	79		94	102	108		107	110	134		88	89	90
Bradi1g09520		5	0	1		5	10	4		5	3	7		7	3	10		4	6	5		6	5	9
Bradi1g09530		389	345	428		438	497	467		540	511	556		564	661	631		625	794	737		653	553	700
Bradi1g09537		3387	3133	2995		3819	3657	3817		3335	3452	3172		2817	2523	2690		1289	1398	1364		3498	3521	3684
Bradi1g09550		641	727	815		775	653	694		809	654	665		774	801	794		971	947	903		791	739	781
Bradi1g09560		286	284	300		335	285	308		345	367	315		351	346	302		459	438	462		257	253	264
Bradi1g09570		830	604	921		125	151	79		96	58	64		17	12	21		18	19	24		25	11	40
Bradi1g09577		141	119	168		99	143	110		122	91	155		155	132	139		218	201	212		198	198	191
Bradi1g09583		21	14	10		7	5	8		15	16	13		160	170	160		141	172	159		17	23	17
Bradi1g09590		1	2	0		2	0	3		2	3	1		11	7	7		3	1	4		0	0	0
Bradi1g09600		49	59	49		73	76	60		62	63	54		58	46	85		63	66	86		12	17	12
Bradi1g09603		0	0	0		0	0	0		1	0	1		0	0	0		4	2	4		0	1	1
Bradi1g09606		0	0	1		0	0	0		0	0	0		0	0	0		0	0	0		0	0	0
Bradi1g09609		56	77	52		52	52	67		59	53	54		96	102	82		146	153	155		82	91	88
Bradi1g09611		0	0	0		0	0	0		0	0	0		0	0	0		0	0	0		0	0	0
Bradi1g09613		0	0	0		0	0	0		0	0	0		0	0	0		0	0	0		0	0	0
Bradi1g09615		923	1041	1040		922	932	855		937	999	841		470	566	495		775	881	735		1129	1115	1127
Bradi1g09630		424	434	488		353	369	384		410	399	460		496	554	548		778	603	611		350	377	361
Bradi1g09633		6	7	14		4	6	2		4	7	8		0	1	2		1	3	0		1	1	0
Bradi1g09637		8	9	7		5	6	8		6	5	6		11	7	3		2	2	3		2	8	3
Bradi1g09670		1	0	0		0	0	3		0	0	0		2	0	1		0	1	2		0	0	0
Bradi1g09680		390	422	506		774	647	690		842	804	1010		1416	1581	1449		735	705	659		377	290	356
Bradi1g09690		0	0	0		0	0	0		0	0	0		0	0	0		0	0	0		0	0	0
Bradi1g09700		0	0	0		0	0	0		0	0	0		0	0	0		0	0	0		0	0	0
Bradi1g09710		13770	12742	17342		12023	11941	12838		10214	10763	12939		6419	6314	6271		6001	4975	5950		8795	8195	7770
Bradi1g09720		0	0	2		0	1	0		0	0	0		0	0	0		0	0	0		0	0	0
Bradi1g09729		9232	8533	10595		10277	11535	10529		9585	9376	10714		9148	8652	9009		15643	14728	15322		13121	12583	12918
Bradi1g09737		1236	1432	1815		1521	1752	1858		2069	2022	2186		4240	3784	3738		8628	8218	8467		4682	4037	4088
Bradi1g09750		585	580	569		854	804	698		665	658	637		953	893	949		959	1401	1169		1269	1259	1475
Bradi1g09760		1207	1110	1230		910	1014	846		676	602	675		261	308	317		248	210	220		1730	2057	1964
Bradi1g09770		91	108	98		119	129	123		125	146	132		145	143	160		143	148	174		173	159	164
Bradi1g09774		93	72	99		136	132	201		179	231	254		265	243	257		231	219	220		173	193	183
Bradi1g09777		21	12	29		55	69	65		77	128	113		91	120	132		64	157	127		142	95	149
Bradi1g09780		179	203	312		310	276	229		154	140	191		156	113	144		110	133	157		168	149	178
Bradi1g09790		1115	1073	1127		795	735	793		482	343	397		347	330	374		139	107	144		904	1078	881
Bradi1g09800		570	602	558		804	762	841		712	818	809		591	555	624		457	562	534		460	478	494
Bradi1g09810		478	485	599		546	466	494		477	457	589		742	802	732		884	886	853		786	855	930
Bradi1g09814		0	0	0		0	0	0		0	0	0		0	0	0		0	0	0		0	0	0
Bradi1g09816		0	0	0		0	0	0		0	0	0		0	0	0		0	0	0		0	0	0
Bradi1g09820		2	0	0		2	0	0		0	0	0		1	0	2		5	4	5		1	1	0
Bradi1g09830		12	7	6		18	21	20		3	9	9		7	3	7		3	3	4		1	4	1
Bradi1g09835		0	0	0		0	0	0		0	0	0		0	0	0		0	0	0		0	0	0
Bradi1g09840		136	144	120		72	116	111		52	53	81		125	109	124		51	59	48		191	216	186
Bradi1g09847		409.25	379.7	321.03		309.63	336.37	323.24		390.6	384.04	349.37		386.32	401.61	401.33		405.88	504.83	443.79		399.85	349.34	378.46
Bradi1g09860		19.75	20.3	13.97		27.37	12.63	23.76		24.4	26.96	32.63		36.68	31.39	35.67		26.12	17.17	30.21		8.15	15.66	10.54
Bradi1g09870		59	39	67		42	61	49		48	44	63		31	33	28		44	57	49		83	76	83
Bradi1g09877		0	0	2		1	0	2		0	1	0		15	13	11		24	23	18		3	2	1
Bradi1g09890		0	0	0		0	0	0		0	0	0		0	0	0		0	0	0		0	0	0
Bradi1g09900		5	4	6		4	7	9		8	10	1		10	11	13		5	7	12		7	10	4
Bradi1g09910		1307	1456	1089		1252	1240	1228		1102	1065	1111		617	566	619		172	117	150		201	280	183
Bradi1g09917		3	6	0		4	5	1		2	2	0		0	0	1		0	0	0		1	0	2
Bradi1g09930		658	531	597		585	581	656		528	536	639		539	431	443		624	604	632		968	938	895
Bradi1g09940		1930.17	1609.69	1877.84		2099.26	2179.75	2210.83		2283.63	2241.61	2233.85		1502.15	1566.85	1583.1		1135.26	1009.42	1063.19		2421.95	2601.56	2178.78
Bradi1g09950		27.83	17.31	21.16		16.74	31.25	22.17		28.37	13.39	32.15		29.85	19.15	35.9		30.74	57.58	37.81		117.05	118.44	110.22
Bradi1g09960		21	17	29		18	34	19		20	16	26		32	34	41		31	36	49		39	48	40
Bradi1g09970		212	191	253		233	288	224		275	170	286		219	246	246		258	330	292		344	336	430
Bradi1g09980		51	49	62		37	45	34		40	22	45		67	44	50		65	44	44		115	146	133
Bradi1g09990		57	66	97		66	87	92		52	82	83		120	130	124		150	215	188		154	124	166
Bradi1g10000		316	344	318		425	371	367		493	522	456		510	501	519		564	566	558		534	505	533
Bradi1g10007		256	253	226		265	247	276		267	240	320		393	436	379		511	533	475		400	349	375
Bradi1g10017		13	4	11		12	10	6		6	6	6		3	2	6		1	2	0		3	1	8
Bradi1g10023		58	64	39		92	89	98		94	124	90		87	94	93		85	78	92		57	59	52
Bradi1g10030		16	17	14		21	13	22		15	24	12		30	28	26		13	25	21		6	5	10
Bradi1g10040		178	161	213		186	144	162		204	186	210		239	215	208		224	222	231		201	227	189
Bradi1g10047		0	0	0		0	0	0		0	0	0		0	0	0		0	0	0		0	0	0
Bradi1g10058		10	11	19		16	21	18		17	16	17		15	13	18		42	51	45		36	36	42
Bradi1g10070		345	351	338		353	298	308		322	287	355		366	373	378		423	392	416		362	360	361
Bradi1g10080		124	143	166		139	126	119		112	162	128		129	155	122		181	162	174		109	146	143
Bradi1g10090		280	324	339		375	317	368		448	478	515		514	484	514		585	566	520		411	390	415
Bradi1g10100		3	2	4		8	5	3		1	4	6		5	3	5		2	2	3		6	2	2
Bradi1g10110		932	904	908		1167	898	1163		1452	1400	1757		3098	2832	2792		3911	3717	3060		1299	1300	1412
Bradi1g10120		350	385	335.19		418.26	453.95	392.24		612.32	647.09	612.17		974.46	945.94	974.05		1110.73	1351.62	1203.16		633.36	637.77	715.12
Bradi1g10130		1	1	1		0	1	1		1	0	1		0	0	0		0	0	0		0	0	0
Bradi1g10140		465	417	363		389	297	296		253	245	230		419	435	397		823	903	798		446	438	464
Bradi1g10150		8517	8843	8145		9456	11041	9749		9829	12009	9933		10218	10334	10556		7741	10237	8052		8677	7038	8077
Bradi1g10161		0	0	0		0	0	0		0	0	0		0	0	0		0	0	0		0	0	0
Bradi1g10170		123	146	136		173	125	76		117	145	55		127	109	129		82	129	123		87	98	131
Bradi1g10175		0	0	0		0	0	0		0	0	0		0	0	0		0	0	0		0	0	0
Bradi1g10180		37	54	56		33	52	56		61	43	78		67	78	56		91	59	69		59	73	65
Bradi1g10190		122	82	145		104	132	129		126	108	168		151	142	138		286	256	271		250	257	331
Bradi1g10200		58	44	58		45	29	43		52	47	38		8	14	5		2	3	0		0	2	5
Bradi1g10210		782	764	809		890	930	883		1045	1010	1067		1012	1113	977		1347	1673	1449		1135	954	1173
Bradi1g10220		301	295	324		205	210	209		213	174	215		299	324	248		294	242	270		244	291	257
Bradi1g10230		2	3	0		0	0	0		0	2	3		1	5	2		7	12	4		1	3	2
Bradi1g10240		53	55	52		72	43	66		109	81	101		237	235	205		309	296	253		137	145	157
Bradi1g10250		225	181	208		182	170	176		199	137	209		200	232	209		328	265	258		274	323	320
Bradi1g10260		269	245	294		302	327	290		591	621	497		763	896	838		735	912	760		360	295	357
Bradi1g10270		142	77	162		156	112	103		141	136	161		395	439	369		370	365	351		304	219	283
Bradi1g10281		6	7	1		4	3	2		2	3	4		8	4	7		14	18	6		2	4	3
Bradi1g10290		57	72	58		121	117	108		94	68	88		84	94	90		124	122	126		38	48	50
Bradi1g10300		208	200	159		172	142	184		168	178	135		237	183	226		314	291	292		263	230	228
Bradi1g10310		4	2	11		5	6	7		9	1	9		3	10	2		3	3	1		4	2	5
Bradi1g10320		10	13	9		9	11	15		19	15	12		10	7	5		11	16	6		18	18	20
Bradi1g10330		208	193	296		212	272	248		234	212	223		140	162	165		219	265	305		493	308	463
Bradi1g10340		1076.48	1088.43	1060.91		1307.8	1231.46	1201.31		1034	1143.82	1174.8		857.37	849.92	873.39		688.36	830.69	778.73		1170.45	933.18	1079.6
Bradi1g10347		163.52	205.57	179.09		154.2	158.54	161.69		121	100.18	126.2		81.63	76.08	67.61		113.64	136.31	147.27		195.55	191.82	180.4
Bradi1g10353		0	0	0		0	0	0		0	0	0		0	0	0		0	0	0		0	0	0
Bradi1g10360		252	246	234		261	293	295		245	255	207		376	376	364		319	341	344		334	349	362
Bradi1g10370		348	312	373		393	396	380		376	425	407		493	464	489		616	739	696		547	491	560
Bradi1g10380		0	0	0		0	0	0		0	0	0		0	0	0		0	0	0		0	0	0
Bradi1g10390		5	0	6		6	7	9		9	1	7		8	12	9		6	11	11		4	4	8
Bradi1g10400		6	3	18		2	5	8		6	5	11		5	4	7		4	6	7		7	7	10
Bradi1g10410		99	104	110		206	198	165		119	157	126		109	101	97		101	65	103		80	42	63
Bradi1g10416		731	614	777		711	774	778		941	946	953		975	940	969		775	834	832		661	678	580
Bradi1g10422		0	0	0		0	0	0		0	0	0		0	0	0		0	0	0		0	0	0
Bradi1g10430		7	7	11		13	13	8		15	6	8		17	13	15		14	14	20		22	4	14
Bradi1g10440		14.62	13.28	8.4		24.26	19.34	27.52		21.91	19.4	15.58		33.09	29.54	16.9		15.45	39.97	33.32		71.8	45.4	70.6
Bradi1g10447		1166.38	997.72	1271.6		1273.74	1274.66	1212.48		1369.09	1340.6	1609.42		1416.91	1342.46	1452.1		1731.55	2112.03	1875.68		2240.2	1616.6	2285.4
Bradi1g10470		61	94	60		94	94	92		118	104	97		114	113	119		91	81	89		70	60	70
Bradi1g10475		6	2	3		3	2	1		2	3	2		2	3	1		0	1	0		1	0	0
Bradi1g10480		3141	3058	3871		4795	4612	4733		6736	6687	7085		10501	10438	11088		8270	9142	9379		6777	5443	6031
Bradi1g10490		1053	1132	1163		1432	1290	1368		1326	1428	1514		1565	1484	1592		1515	1734	1791		1687	1405	1581
Bradi1g10500		0	0	0		1	0	0		0	0	0		0	0	0		0	1	0		0	1	0
Bradi1g10510		0	0	0		0	0	0		0	0	0		0	0	0		0	0	0		0	0	0
Bradi1g10520		6	2	1		4	3	2.05		2.24	0	1		8.73	4	2		4	9.43	4.68		11	3.38	13.88
Bradi1g10525		18	18	10		9	10	12.95		10.76	18	11		2.27	3	5		0	2.57	3.32		6	6.62	3.12
Bradi1g10530		636	559	572		553	582	512		438	439	424		500	469	497		469	635	586		881	715	904
Bradi1g10540		1257	1312	1317		1027	1225	971		979	1043	1051		995	866	1040		971	1277	1302		1103	918	1023
Bradi1g10550		613	602	653		661	661	654		630	662	763		707	752	780		884	1093	938		1216	917	1103
Bradi1g10560		88	147	46		75	75	78		59	56	36		26	42	31		23	26	24		20	11	10
Bradi1g10567		4	4	3		0	5	3		2	5	4		5	2	3		4	3	5		1	3	2
Bradi1g10580		767	854	976		791	857	1023		1043	866	1039		1184	1192	1164		1605	1408	1589		1024	901	998
Bradi1g10590		313	277	400		253	294	269		312	288	355		283	282	281		298	257	302		264	303	278
Bradi1g10600		96	118	158		182	248	201		181	173	234		187	186	223		246	295	264		229	183	231
Bradi1g10605		0	0	0		0	0	0		0	0	0		1	0	0		0	0	0		0	0	1
Bradi1g10610		0	0	0		0	0	1		0	0	3		0	0	0		0	2	0		2	4	0
Bradi1g10621		1	1	0		1	1	0		1	2	0		1	0	1		2	1	0		3	0	5
Bradi1g10630		1806	1646	2037		1838	2106	1982		1994	2207	2087		1909	1971	1866		886	873	891		1272	1134	1234
Bradi1g10635		0	0	0		0	0	0		0	0	0		0	0	0		0	0	0		0	0	0
Bradi1g10640		7880	7491	7854		8848	7214	7324		5747	7070	6823		5286	5285	5707		4381	4666	4751		3525	3401	3311
Bradi1g10650		11	13	33		14	24	15		16	12	14		10	8	3		1	6	2		6	8	9
Bradi1g10660		1308	1241	1264		1259	1219	1059		819	897	761		579	630	625		672	845	753		1978	1630	1984
Bradi1g10670		50	36	50		42	60	83		66	66	60		63	100	71		67	50	67		55	27	30
Bradi1g10680		7	4	4		6	16	11		6	5	4		9	5	14		6	2	4		6	13	10
Bradi1g10689		6	0	7		1	1	1		4	0	0		4	5	8		5	2	2		1	0	1
Bradi1g10697		594	574	645		769	701	724		788	873	852		1072	1181	1138		1287	1600	1252		1129	777	1056
Bradi1g10710		217	221	253		242	247	232		281	298	332		323	279	299		412	393	333		314	272	309
Bradi1g10715		2	0	2		2	0	0		1	0	0		0	0	3		0	0	0		0	0	2
Bradi1g10720		1417	1356	1379		1454	1393	1524		1526	1405	1611		1708	1796	1721		2632	2262	2092		1698	1873	1882
Bradi1g10725		8	0	1		12	2	6		5	2	1		1	4	1		5	2	8		1	0	0
Bradi1g10731		2	2	2		3	7	3		3	2	4		3	2	2		2	1	4		2	1	1
Bradi1g10741		0	0	0		0	0	0		0	0	0		0	0	0		0	0	0		0	0	0
Bradi1g10750		0	0	0		0	0	0		0	0	0		0	0	0		0	2	1		0	0	0
Bradi1g10760		235	229	234		270	292	293		487	407	485		254	262	281		241	262	265		158	164	124
Bradi1g10765		0	0	0		0	0	0		0	0	0		0	0	0		0	1	0		0	0	0
Bradi1g10770		3	1	1		3	2	7		3	3	1		7	8	8		48	41	38		2	0	1
Bradi1g10780		715	656	767		830	746	876		843	842	1006		1358	1379	1258		1533	1377	1383		685	747	672
Bradi1g10790		1	0	2		0	3	0		1	0	0		5	5	2		5	5	4		2	1	2
Bradi1g10800		0	0	0		0	0	0		0	0	0		0	0	0		0	0	0		0	0	0
Bradi1g10810		721	808	863		825	809	782		893	796	872		940	906	902		1152	1236	1233		1371	1323	1246
Bradi1g10820		0	0	1		0	0	1		1	0	1		0	0	0		2	1	0		1	0	1
Bradi1g10831		0	0	0		0	0	0		0	0	0		0	0	0		0	0	0		0	0	0
Bradi1g10840		80	65	102		94	72	56		100	46	84		89	63	92		141	118	138		178	219	196
Bradi1g10845		0	0	0		0	0	0		0	0	0		0	0	0		0	0	0		0	0	0
Bradi1g10850		0	0	0		0	0	0		1	0	1		0	0	0		0	0	0		0	0	0
Bradi1g10860		29	26	38		28	34	37		19	24	20		10	4	11		1	6	5		8	12	8
Bradi1g10865		0	1	2		3	3	5		4	1	2		1	4	2		3	5	2		4	1	3
Bradi1g10870		259	251	296		243	213	178		237	239	255		242	269	256		311	259	252		244	270	267
Bradi1g10875		132	142	147		133	105	95		139	161	137		127	133	143		144	180	145		222	207	257
Bradi1g10880		894.91	814.94	891.36		894.97	816.42	874.27		1089.1	1076.8	1247.3		1079.8	965.34	977.72		904.79	872.25	822.84		982.09	860.43	980.72
Bradi1g10891		1.71	0	1.2		0	0	0		0	0	1.76		0	0	0		0	0	0		0	0	0
Bradi1g10900		179.09	180.06	149.64		407.03	420.58	388.73		418.9	553.2	442.7		410.2	382.66	488.28		200.21	553.75	453.16		573.91	465.57	655.28
Bradi1g10910		0	0	0		0	1	0		0	0	0		0	0	0		0	0	1		0	0	0
Bradi1g10917		34.29	35	29.8		39	26	22		22	24	22.48		8	5	3		3	2	5		46	59.41	45
Bradi1g10930		107	87	121		147	137	114		92	86	114.77		44	45	36		32	32	28		95	126.59	96
Bradi1g10940		78	66	91		74	106	88		65	66	79		64	66	58		57	66	56		121	126	139
Bradi1g10945		2	2	4		2	3	0		4	2	1		0	0	3		0	0	0		0	1	1
Bradi1g10950		1737	1787	2193		2803	2467	2537		2975	2847	2808		4144	4098	3925		4307	4757	4147		2802	2350	2940
Bradi1g10960		1612	1320	1279		1183	1205	1090		647	662	638		444	441	474		398	448	444		1624	1725	1832
Bradi1g10970		516	495	615		612	543	523		509	480	603		555	580	578		575	587	562		610	583	646
Bradi1g10975		3	0	2		3	3	2		5	2	3		1	0	5		1	2	7		1	2	1
Bradi1g10980		377	357	461		348	342	377		403	343	436		276	306	324		307	252	333		234	248	241
Bradi1g10990		4464	3489	4646		3984	4474	4370		3585	3690	4122		2853	2490	2811		1162	947	1007		3064	3913	3527
Bradi1g11000		2125	2086	1812		2239	2172	2284		1672	1648	1603		898	930	1006		547	581	605		1690	1833	1730
Bradi1g11010		583.39	559.58	659.66		537.01	501.53	544.8		477.98	530.52	582.55		526.31	477.26	481.91		761.74	671.99	678.54		825.27	879.51	838.1
Bradi1g11020		313.61	294.42	296.34		369.99	326.47	332.2		340.02	343.48	333.45		450.69	438.74	455.09		402.26	535.01	431.46		553.73	592.49	605.9
Bradi1g11027		605	663	613		672	615	603		708	728	653		672	629	720		675	855	708		642	459	551
Bradi1g11040		306	274	313		221	260	251		344	383	408		339	370	310		267	351	372		402	350	405
Bradi1g11050		77	51	131		59	79	63		74	87	78		7	8	8		19	18	18		101	103	108
Bradi1g11060		0	0	0		0	0	0		0	0	0		0	0	0		0	0	0		0	0	0
Bradi1g11066		0	0	0		0	0	0		0	0	0		0	0	0		0	0	0		0	0	0
Bradi1g11070		703	648	742		854	787	842		862	785	867		976	1088	973		1263	1309	1198		1027	997	1138
Bradi1g11080		970	1251	1000		1122	706	805		516	553	627		576	645	612		468	396	384		586	605	600
Bradi1g11090		1233	1236	1327		1131	1327	1163		1309	1263	1192		1275	1316	1358		1846	2213	2232		3179	3126	3053
Bradi1g11101		1	3	3		1	1	1		1	0	0		1	1	0		0	1	0		1	0	4
Bradi1g11110		1050	970	1216		1094	1128	1097		1112	1112	1169		1149	1123	1181		1637	1668	1726		1890	1870	2083
Bradi1g11120		35	38	31		31	34	24		54	48	55		55	33	44		37	41	48		66	66	54
Bradi1g11130		984	886	972		1017	958	1072		1027	995	1130		1669	1661	1653		2672	2624	2663		1695	1860	1875
Bradi1g11140		20	25	24		21	6	12		12	9	9		28	27	11		63	67	57		49	50	55
Bradi1g11150		4464	4301	4262		4954	4222	4516		4130	4118	4006		4455	4544	4355		3770	3991	3766		3235	3249	3362
Bradi1g11160		1583	1263	1511		1343	1676	1321		1002	995	1069		750	654	948		1000	1082	1114		4931	4542	4161
Bradi1g11171		108	122	101		76	69	113		101	91	111		101	128	93		177	143	175		103	142	104
Bradi1g11180		360	338	331		472	523	483		463	483	546		548	547	598		516	820	638		669	593	709
Bradi1g11187		292	376	387		422	470	493		457	483	460		364	373	369		319	367	372		595	484	562
Bradi1g11200		305	275	298		311	322	321		435	463	481		363	280	356		357	410	395		329	324	271
Bradi1g11210		247	195	276		186	342	196		195	165	252		257	256	270		375	338	329		530	504	569
Bradi1g11220		2047	2233	2778		1784	2023	1692		3061	2231	3377		3364	3440	3451		2278	1923	2041		2258	2415	2382
Bradi1g11230		3	1	0		1	0	0		1	6	4		11	14	7		1	4	4		6	1	3
Bradi1g11240		2378	2293	3409		1957	2100	2592		2693	2396	2287		3199	2899	2784		1856	1427	2041		686	1184	1215
Bradi1g11250		1816	1916	2895		2838	2286	1325		1658	1332	1736		417	435	456		404	503	508		286	250	303
Bradi1g11260		2	6	2		3	1	7		3	0	6		1	2	2		2	2	2		3	0	0
Bradi1g11270		2256	1976	2273		1731	2028	1828		1443	1272	1644		459	347	549		272	217	294		2387	2683	2309
Bradi1g11273		0	0	0		0	0	0		0	0	0		0	0	0		0	0	0		0	0	0
Bradi1g11277		2	1	0		0	1	0		0	1	0		0	0	0		0	0	0		0	0	0
Bradi1g11280		222	234	280		492	415	435		195	269	247		105	95	109		172	153	137		67	103	58
Bradi1g11290		6728	6131	6842		6599	6697	7172		7195	7652	8110		8773	8654	8564		7644	7763	7664		8446	7477	7359
Bradi1g11300		634	621	723		656	695	674		823	928	895		880	959	926		844	908	797		717	611	714
Bradi1g11310		22284	19748	20394		12242	12816	13810		12176	11214	11444		18055	18016	17195		31188	30519	25290		16857	19240	15881
Bradi1g11317		768	771	900		1113	1091	1138		1181	1356	1309		1063	1138	1075		1038	1290	1107		1226	891	1132
Bradi1g11330		0	1	0		0	0	1		0	0	0		0	1	0		0	0	0		0	0	0
Bradi1g11340		503	440	499		497	513	580		602	623	705		693	740	701		663	774	737		582	582	565
Bradi1g11350		446	457	429		427	414	426		562	599	596		782	762	745		828	811	847		740	874	739
Bradi1g11357		0	0	0		0	0	0		0	0	0		0	0	0		0	0	0		0	0	0
Bradi1g11365		863.08	812.61	1025.24		733.13	815.12	861.22		1023.65	948.88	1136.79		1714.71	1695.8	1583.53		2389.9	2095.14	2059.49		1032.72	1137.6	899.57
Bradi1g11372		128.92	104.39	133.76		103.87	104.88	99.78		83.35	111.12	70.21		71.29	70.2	81.47		74.1	89.86	77.51		146.28	139.4	164.43
Bradi1g11380		968	1035	1155		1151	1079	1114		1191	1231	1443		1472	1628	1573		1603	1766	1515		1601	1364	1561
Bradi1g11390		0	0	0		0	1	0		0	0	1		0	1	4		0	0	1		0	1	1
Bradi1g11397		50	40	50		40	73	56		48	43	70		63	62	55		99	125	104		159	137	165
Bradi1g11410		544	522	548		425	478	464		397	373	462		430	379	420		451	443	506		557	616	586
Bradi1g11420		0	0	0		0	0	0		0	0	0		0	0	0		0	0	0		0	0	0
Bradi1g11423		1	0	0		0	1	0		0	0	0		0	0	1		0	1	0		0	0	0
Bradi1g11426		11	12	15		14	7	16		15	16	13		13	4	9		9	15	17		13	24	17
Bradi1g11430		245	231	313		418	414	379		458	423	410		226	276	253		271	330	320		327	267	359
Bradi1g11435		0	0	0		0	0	0		0	0	0		0	0	0		0	0	0		0	0	0
Bradi1g11440		6586.41	7550.26	7757.12		7167.69	7678.41	7719.03		7516.11	7582.35	7430.1		5693.92	5577	5459		4471	4639.74	4544.65		6828.8	5819	6530
Bradi1g11450		1.59	1.74	1.88		1.31	2.59	3.97		2.89	6.65	9.9		4.08	0	0		0	1.26	1.35		1.2	0	0
Bradi1g11465		52	66	55		36	38	45		32	35	24		36.12	38	36		65	61	54		88	103.16	88.15
Bradi1g11480		45	51	22		55	73	48		53	63	53		67	53	69		70	153	114		297	179	275
Bradi1g11490		1080	1085	1071		1227	1116	1266		856	1066	1175		717	618	620		646	706	591		924	899	1192
Bradi1g11500		1604	1600	1626		1894	1993	2010		2351	2709	2668		2099	2115	2190		1063	1290	1163		1313	984	1268
Bradi1g11510		59	52	34		31	40	29		49	27	47		19	13	28		20	14	10		147	149	169
Bradi1g11520		2028	1867	1993		1809	1965	1961		1887	2113	2316		2432	2432	2429		2302	2803	2419		2796	2390	2754
Bradi1g11525		0	0	0		0	0	0		0	0	0		0	0	0		0	0	0		0	0	0
Bradi1g11530		923	963	894		1050	922	1061		943	904	874		1394	1334	1457		1596	2197	1849		894	788	911
Bradi1g11540		1089	1081	1152		1370	1361	1427		1504	1696	1688		2028	2102	2133		1697	1843	1695		1514	1293	1400
Bradi1g11550		722	700	647		731	589	700		682	630	643		1075	992	926		1184	1187	1104		934	937	871
Bradi1g11557		91	90	92		79	102	77		120	89	106		123	98	125		140	128	148		127	137	138
Bradi1g11567		0	2	0		0	0	0		0	0	0		0	0	1		0	0	0		0	0	0
Bradi1g11573		0	2	0		1	1	0		0	0	0		1	0	0		0	0	0		0	0	0
Bradi1g11580		905	806	603		393	339	265		281	207	226		344	338	324		298	288	295		388	449	362
Bradi1g11600		18	17	12		11	22	19		21	16	17		25	19	34		52	68	51		78	51	59
Bradi1g11610		971	962	1001		899	951	870		738	714	889		397	325	393		459	389	442		964	1131	1104
Bradi1g11620		3500	3115	2709		3100	2146	2329		623	839	642		390	345	483		447	358	296		199	223	161
Bradi1g11630		2	15	17		13	7	9		13	10	13		5	1	6		2	7	6		0	1	4
Bradi1g11640		299	288	268		356	338	319		253	302	335		533	510	544		673	714	668		498	384	505
Bradi1g11645		0	0	0		0	0	0		1	0	0		0	0	0		0	0	2		1	0	0
Bradi1g11650		11	10	9		23	28	24		16	40	31		65	45	72		66	145	86		88	61	72
Bradi1g11670		4829	4514	5309		8900	8419	7808		6824	6914	6565		7964	7981	7973		9423	11566	10264		5823	4763	5669
Bradi1g11680		3677	4267	4397		7261	2866	3124		10855	7644	9895		9555	10504	8102		8677	9774	9381		16579	13458	15132
Bradi1g11687		312	303	270		215	157	196		196	171	187		246	261	257		300	218	280		273	297	305
Bradi1g11700		646	617	740		631	658	660		630	566	760		725	712	738		715	657	661		852	1025	863
Bradi1g11710		5178	4657	3938		2820	1961	2327		2898	2291	2150		9065	7972	8734		11217	10615	9932		1920	2242	2143
Bradi1g11720		1079	958	906		1072	1046	1084		951	957	975		983	971	1004		915	979	900		1636	1669	1583
Bradi1g11725		3	2	2		4	9	3		4	5	6		12	7	8		7	18	14		44	23	36
Bradi1g11730		1323.87	1230.74	1415		1418.72	1677	1361.56		1523	1372	1605		1868.81	1808.84	1858.63		2446.24	3248.31	2688.82		3019	2685.35	3200
Bradi1g11740		5	10	9		5	5	3		7	12	11		6	4	7		1	1	2		0	1	5
Bradi1g11750		152	207	188		163	152	143		139	120	121		22	30	25		15	14	9		59	71	63
Bradi1g11754		0	0	0		0	0	0		0	0	0		0	0	0		0	0	0		0	0	0
Bradi1g11757		1	0	0		1	0	1		2	1	2		2	2	3		1	3	0		6	0	3
Bradi1g11760		132	131	137		203	226	229		292	343	378		241	225	219		211	342	295		514	518	671
Bradi1g11770		493	505	501		468	383	439		365	332	382		334	279	386		553	473	583		780	776	751
Bradi1g11780		251	299	295		283	304	295		425	394	486		405	405	362		363	394	330		238	184	243
Bradi1g11785		0	0	0		0	0	0		0	0	0		0	1	0		0	0	0		0	0	0
Bradi1g11790		0	0	0		1	1	0		0	0	0		0	0	0		0	1	0		0	0	0
Bradi1g11795		1	1	0		0	0	0		0	0	0		0	0	0		0	0	0		0	0	0
Bradi1g11800		1600	1794	1929		2495	2041	1985		1292	1205	1167		1077	1102	1111		1215	1107	1179		935	1160	1062
Bradi1g11805		9	5	15		1	1	0		1	1	0		1	0	0		0	0	1		0	0	0
Bradi1g11810		402	406	390		488	487	551		519	534	515		340	335	330		357	298	308		377	302	304
Bradi1g11817		504	494	517		659	535	553		563	598	647		549	613	624		504	567	606		684	593	703
Bradi1g11830		2044	1983	2334		1602	1880	1961		1858	1667	2200		2150	2006	2067		2525	1987	2207		1884	1962	1869
Bradi1g11837		1622	1570	1706		1897	1899	1890		1594	1560	1630		1721	1805	1728		1639	1690	1922		2825	2918	2958
Bradi1g11843		0	0	0		5	3	0		1	3	0		5	0	1		2	3	3		2	2	0
Bradi1g11850		8	1	3		7	8	2		1	1	4		3	2	0		2	1	0		8	14	8
Bradi1g11860		0	0	0		0	0	0		0	0	0		0	0	0		0	0	0		0	0	0
Bradi1g11870		0	0	0		0	0	0		0	0	0		0	0	0		0	0	0		0	0	0
Bradi1g11876		6	4	3		3	4	4		5	6	8		2	4	7		7	6	6		11	12	8
Bradi1g11882		54	49	46		57	64	51		44	40	50		58	59	53		59	81	67		91	96	85
Bradi1g11890		347	286	427		253	334	235		349	250	360		256	276	277		393	268	299		282	305	265
Bradi1g11900		100	88	92		82.55	101	72		84	69.41	92		92	92	101.27		139	133	108		206.82	199	223
Bradi1g11910		1	1	0		1.45	2	1		3	3.59	0		3	0	2.73		2	0	0		1.18	0	0
Bradi1g11920		3385.92	3154.63	3795.94		2003.95	1767.89	1987.76		4745.46	3850.88	3118.96		19169.6	17943.4	17669.4		28268.2	25032.3	28259.8		13804.3	16698.3	14614
Bradi1g11930		46.08	153.37	81.06		96.05	103.11	56.24		221.54	154.12	117.04		934.39	762.57	917.59		1258.83	1338.69	1681.16		359.73	511.65	558.95
Bradi1g11940		0	0	1		0	0	0		2	1	0		1	4	3		0	3	3		0	1	0
Bradi1g11950		348	383	376		346	358	362		461	468	435		431	454	418		499	471	503		413	487	455
Bradi1g11960		573	532	541		597	558	596		544	499	589		701	685	641		924	982	1038		718	770	808
Bradi1g11971		0	0	0		1	0	0		0	0	0		0	1	0		0	0	0		0	0	0
Bradi1g11980		595	673	693		913	924	880		1299	1404	1317		850	858	871		817	824	760		694	608	679
Bradi1g11986		1822	1574	1694		1758	1861	1926		1444	1238	1489		1000	1122	1054		954	944	1018		2413	2351	1945
Bradi1g11992		455	449	558		465	510	528		583	528	594		668	691	713		779	780	831		827	770	758
Bradi1g12000		75	95	86		115	111	134		89	103	87		56	73	72		67	53	71		85	83	74
Bradi1g12010		58	64	52		52	79	73		88	48	48		55	34	46		43	38	40		71	50	89
Bradi1g12021		0	0	0		0	0	0		0	0	0		0	0	0		0	0	0		0	0	0
Bradi1g12030		2	2	8		5	9	7		4	5	6		4	4	4		0	2	2		9	12	8
Bradi1g12040		874.82	869.72	1059		882.2	947	800.16		1222.72	1447	1121.07		2938.12	3122.84	2819.65		2417.11	3298.49	2683.72		1431.98	1324.3	1401
Bradi1g12042		0.18	0.94	0		1.8	0	1.77		3.28	0	1.93		2.88	1.16	0.35		1.89	0.95	2.28		1.02	0	0
Bradi1g12045		0	0.34	0		0	0	0.07		0	0	0		0	0	0		0	2.56	0		0	1.7	0
Bradi1g12050		1885	1754	2390		2406	2340	2511		2953	3257	3862		3292	3525	3419		2071	2489	2152		1886	1414	1758
Bradi1g12060		0	0	0		0	0	0		0	0	0		0	0	0		0	0	0		1	0	0
Bradi1g12063		1	0	3		3	1	5		4	5	5		5	0	4		2	4	2		1	0	5
Bradi1g12064		3	3	3		4	1	1		0	0	0		2	1	0		0	1	0		0	0	0
Bradi1g12065		0	0	0		0	0	1		0	0	0		0	0	0		0	0	0		0	0	0
Bradi1g12067		7	1	2		2	4	0		4	4	5		3	2	7		1	2	0		4	1	5
Bradi1g12080		223	257	224		443	365	361		393	474	341		239	211	217		276	218	244		54	66	60
Bradi1g12090		70	82	142		51	67	62		96	94	64		27	35	28		20	11	17		19	14	21
Bradi1g12095		0	0	0		0	0	0		0	0	0		0	0	0		0	0	0		0	0	0
Bradi1g12100		449	423	439		337	349	404		361	397	451		394	458	410		325	278	288		287	356	316
Bradi1g12110		154	160	185		191	205	186		150	175	214		174	189	205		314	290	305		419	378	419
Bradi1g12117		112	117	133		123	134	84		130	104	142		225	150	206		426	470	387		790	773	991
Bradi1g12130		136	213	78		147	51	74		137	56	18		4	8	9		4	0	3		3	6	2
Bradi1g12140		1431	1273	1062		1586	1192	1397		1308	1267	1273		4014	3709	4038		3859	4579	4178		1377	1291	1519
Bradi1g12150		45	53	56		71	74	44		65	80	75		106	90	111		91	133	155		120	139	142
Bradi1g12157		774	706	750		745	846	719		803	747	794		838	795	811		899	1015	1030		988	944	1068
Bradi1g12170		253	248	315		241	237	249		209	166	242		293	264	267		354	335	347		273	339	342
Bradi1g12180		378	394	378		403	476	479		440	476	478		851	850	807		672	760	727		498	429	486
Bradi1g12190		1621	1622	1706		2530	2534	2819		3859	4189	3768		5134	5472	5368		3253	3788	3731		2264	2014	2283
Bradi1g12196		9	14	4		65	37	43		31	60	42		57	65	78		27	60	35		29	13	34
Bradi1g12200		668	671	672		748	758	693		573	564	569		280	338	303		316	309	261		781	849	937
Bradi1g12210		4177	4102	5188		3493	3416	3441		4140	3441	4061		5353	5347	4841		6480	5363	5848		3870	4311	3712
Bradi1g12216		490	559	521		690	661	657		697	636	740		895	881	963		979	1289	1073		1096	877	1054
Bradi1g12222		1	5	2		1	2	1		3	2	2		2	4	2		0	4	0		0	3	0
Bradi1g12226		0	0	0		0	0	0		0	0	0		0	0	1		0	0	1		0	0	0
Bradi1g12230		7654	6821	8081		6254	6399	6642		6248	5884	7760		7972	7461	7345		7105	6059	6842		6064	7034	6086
Bradi1g12240		638	1125	466		636	292	347		1129	1159	377		189	161	276		58	81	74		45	57	111
Bradi1g12250		39	25	37		30	31	33		49	24	42		25	22	36		64	42	56		81	74	98
Bradi1g12260		996	748	968		835	896	873		696	668	670		365	378	351		353	373	315		1117	1435	1291
Bradi1g12270		0	0	0		0	0	0		0	0	0		0	0	0		0	0	0		0	0	0
Bradi1g12280		940	1096	978		1051	868	700		403	410	335		111	92	112		152	164	216		1515	1595	1806
Bradi1g12290		6	4	5		3	6	1		4	3	6		9	3	7		8	5	8		9	5	4
Bradi1g12300		1392	1380	1312		1434	1427	1481		1094	1127	1023		702	624	695		655	719	631		2066	1954	1987
Bradi1g12306		0	0	0		0	0	0		0	0	0		0	0	0		0	0	0		0	0	0
Bradi1g12309		0	2	1		1	3	0		2	3	1		3	0	0		2	2	5		0	0	1
Bradi1g12312		46	30	29		37	35	35		46	31	47		60	78	69		81	68	87		49	69	64
Bradi1g12314		0	0	0		0	0	0		0	0	0		0	0	0		0	0	0		0	0	0
Bradi1g12316		0	1	0		0	3	1		0	0	1		0	0	0		0	2	0		0	1	0
Bradi1g12320		85	80	91		86	78	100		120	118	153		106	102	86		144	192	147		167	158	169
Bradi1g12325		0	0	0		0	0	0		0	0	0		0	0	0		0	0	0		0	0	0
Bradi1g12330		552	571	614		530	509	573		459	429	462		539	523	478		600	657	630		704	797	700
Bradi1g12340		397	428	494		490	484	547		627	636	663		600	786	672		672	834	750		699	530	648
Bradi1g12350		0	0	0		0	0	0		0	0	0		0	0	0		2	2	1		0	0	0
Bradi1g12360		0	0	4		2	0	1		1	3	6		441	300	446		1045	878	1527		45	66	91
Bradi1g12370		0	0	0		0	0	0		0	0	0		0	0	0		0	0	0		0	0	0
Bradi1g12377		37	36	51		449	429	385		233	279	239		55	68	57		14	17	17		9	9	7
Bradi1g12390		0	0	0		0	0	0		0	0	0		0	0	0		0	0	0		0	0	0
Bradi1g12397		95	88	87		278	219	215		210	223	212		263	312	278		205	215	219		136	133	128
Bradi1g12410		14	10	14		86	58	44		33	23	26		14	12	12		7	15	15		6	5	7
Bradi1g12420		0	0	0		0	0	1		0	0	0		0	0	0		0	0	0		0	0	0
Bradi1g12431		0	0	0		0	0	0		0	0	0		0	0	0		0	0	0		0	0	0
Bradi1g12440		41	15	25		50	26	41		58	46	74		178	194	220		57	90	96		27	24	43
Bradi1g12451		0	0	0		0	0	0		0	0	0		0	1	0		0	0	0		0	0	0
Bradi1g12460		389	353	413		320	419	314		383	347	389		511	442	461		485	423	396		476	466	490
Bradi1g12470		536	452	570		617	657	588		630	713	774		772	821	822		707	928	810		949	875	973
Bradi1g12475		4	13	11		6	8	4		10	8	9		10	6	15		9	22	11		2	9	8
Bradi1g12476		0	0	0		0	0	0		0	0	0		0	0	0		0	0	0		0	0	0
Bradi1g12477		0	0	0		0	0	0		0	0	0		0	0	0		0	0	0		0	0	0
Bradi1g12480		923	967	1033		777	827	838		945	828	851		807	910	886		1003	843	930		645	743	732
Bradi1g12490		777	830	909		1079	1029	994		1024	1041	1073		1149	1213	1277		1302	1506	1260		1422	1218	1563
Bradi1g12497		36	30	43		29	27	24		44	36	37		43	38	46		54	44	60		26	40	30
Bradi1g12503		0	0	0		0	0	0		0	0	0		0	0	0		0	0	0		0	0	0
Bradi1g12510		721	659	697		713	814	699		676	704	720		709	759	764		907	1126	946		1195	1097	1296
Bradi1g12520		24	24	17		25	24	25		18	20	17		30	32	25		51	47	39		20	18	20
Bradi1g12530		0	0	0		0	0	0		0	0	0		0	0	0		0	0	0		0	0	0
Bradi1g12540		0	0	0		0	0	0		0	0	0		0	0	0		0	0	0		0	0	0
Bradi1g12543		0	0	0		0	0	0		0	0	0		0	0	0		0	0	0		0	0	0
Bradi1g12550		1991	1495	1896		2284	2783	2849		1824	2093	2617		2795	2234	3003		7301	10679	8579		18767	9406	12827
Bradi1g12560		8	11	2		15	12	11		27	16	22		48	32	49		18	25	42		2	3	16
Bradi1g12570		776	878	1131		1620	1366	1303		979	1002	1048		436	471	429		285	300	347		324	320	326
Bradi1g12580		1896	1502	2293		1785	1777	1582		2074	1914	1673		782	650	704		389	459	408		126	176	146
Bradi1g12590		0	0	0		0	0	0		0	0	0		0	0	0		0	0	1		0	0	0
Bradi1g12600		5	5	8		8	4	6		5	7	4		6	6	5		3	4	3		7	10	8
Bradi1g12610		9	12	6		13	17	19		33	31	26		25	26	22		19	16	23		24	24	33
Bradi1g12615		85	106	79		74	62	77		58	38	61		44	37	42		28	24	22		83	78	55
Bradi1g12620		8	11	10		8	15	11		29	15	17		25	15	28		15	19	24		20	38	33
Bradi1g12630		1	5	1		0	1	0		3	4	2		11	5	5		1	0	3		6	10	12
Bradi1g12640		28	32	29		32	14	23		48	40	32		383	307	391		406	448	399		80	97	94
Bradi1g12650		23	32	20		17	17	28		36	32	31		34	41	30		25	55	47		39	36	37
Bradi1g12660		109	139	128		124	130	117		94	86	79		157	165	195		234	295	255		209	170	215
Bradi1g12670		187	202	198		238	236	209		225	223	224		223	245	224		181	192	244		217	202	239
Bradi1g12673		114	106	117		116	114	116		159	141	150		141	129	142		130	89	119		107	141	111
Bradi1g12675		22	37	38		29	30	25		21	22	30		44	42	41		56	50	69		67	84	55
Bradi1g12677		16	18	1		3	3	3		13	4	1		4	9	9		4	9	1		17	8	5
Bradi1g12690		3	3	3		1	2	2		12	1	1		10	4	5		6	8	5		7	6	15
Bradi1g12693		0	1	0		0	0	0		0	0	0		0	0	0		0	0	0		0	0	0
Bradi1g12697		44	37.12	46.35		96.24	106.54	77		65.35	89.96	54.28		58.57	64.13	62.17		51.57	112.88	93.7		218.66	147.63	213.93
Bradi1g12701		1.87	0	1.03		4.13	3.04	0		0	7.14	3.02		0	1.06	0		1.06	0	1.06		7.78	5.68	2.66
Bradi1g12703		0	0	0		1	0	0		0	0	0		0	0	0		0	0	0		1	1	1
Bradi1g12705		258.95	239	277.97		237.87	226.96	244		186	204.86	189.85		179	175.94	164		247.94	197	220.94		278.66	333.65	274.9
Bradi1g12710		2	3	5		2	2	2		1	0	3		0	2	0		0	0	0		4	1	0
Bradi1g12715		389	343.37	443.42		170.38	152	172		234.8	152.01	154		244	273	315.45		576	437.14	483.38		333	408.39	381.49
Bradi1g12720		22	23	11		5	3	4		2	4	4		0	0	1		2	3	4		8	10	10
Bradi1g12727		0	0	0		0	0	0		0	0	0		0	0	0		0	0	0		0	0	0
Bradi1g12740		0	0	1		0	0	0		1	1	0		1	0	0		0	0	0		2	0	3
Bradi1g12750		16	19	25		18	17	18		11	15	21		39	46	36		48	67	45		43	37	60
Bradi1g12760		256	292	269		156	179	201		280	290	315		352	345	363		461	469	487		475	473	471
Bradi1g12765		0	0	1		0	0	0		0	0	0		0	0	0		0	0	0		0	0	0
Bradi1g12770		0	0	0		0	0	0		1	1	0		0	0	0		0	0	0		1	1	0
Bradi1g12780		16	26	12		21	13	14		14	18	7		10	22	32		21	29	20		43	32	24
Bradi1g12783		0	0	0		0	0	0		0	0	0		0	0	0		0	0	0		0	0	0
Bradi1g12787		6584	5990	8148		6225	6957	6220		9421	8266	9708		27492	25018	27696		93919	91488	88135		32702	31041	30108
Bradi1g12800		346	359	359		287	300	317		412	408	420		348	416	374		411	408	309		181	222	212
Bradi1g12810		294	252	450		208	246	206		182	160	234		145	130	150		196	236	220		768	840	844
Bradi1g12820		693	728	819		831	792	827		1205	1285	1267		1109	1140	1134		959	857	963		777	794	894
Bradi1g12830		75	55	78		68	68	63		71	49	54		53	46	46		28	21	23		51	26	33
Bradi1g12837		151	165	236		127	186	122		116	132	167		129	158	161		178	200	179		259	279	270
Bradi1g12850		530	383	447		363	525	411		299	260	315		162	184	184		374	355	375		1488	1464	1298
Bradi1g12851		36	22	27		23	15	15		25	11	29		17	14	13		29	19	17		43	50	40
Bradi1g12852		11	12	12		15	15	14		14	11	8		10	3	7		7	22	6		33	30	44
Bradi1g12853		0	0	0		0	0	0		0	0	0		0	0	0		0	1	0		0	0	1
Bradi1g12856		0	0	0		0	0	0		0	0	0		0	0	0		0	0	0		0	0	0
Bradi1g12860		0	0	0		0	0	0		0	0	3		2	0	0		0	1	2		2	0	0
Bradi1g12870		1055	1040	1189		2522	1721	1654		1073	1062	1169		484	596	531		483	358	470		821	767	1127
Bradi1g12875		46	48	30		22	19	16		26	9	10		11	7	7		1	3	0		45	61	50
Bradi1g12880		2449	2302	2382		1687	1578	1568		1073	1033	1146		733	854	707		742	624	624		2539	2731	2551
Bradi1g12890		1017	1062	1069		1003	983	1067		1017	1066	1033		1241	1236	1209		1201	1041	1118		943	1004	901
Bradi1g12900		0	0	0		0	0	0		0	0	0		0	0	0		0	0	0		0	0	0
Bradi1g12910		1030	1041	1063		1213	1100	1218		1258	1323	1214		1472	1491	1486		1796	1922	1834		1438	1343	1507
Bradi1g12920		277	266	263		337	363	323		419	490	492		462	472	428		379	509	445		460	366	457
Bradi1g12940		696	712	729		761	812	878		781	734	835		732	675	677		684	656	671		728	671	656
Bradi1g12950		26	40	32		24	22	26		28	21	16		9	11	14		3	2	6		10	9	5
Bradi1g12955		0	0	1		0	0	0		0	0	0		0	1	1		1	1	2		0	1	1
Bradi1g12960		97	103	82		81	88	95		81	83	79		45	46	43		59	67	65		145	130	141
Bradi1g12970		121	90	108		204	198	118		157	142	147		158	140	157		180	165	166		41	43	44
Bradi1g12980		36	40	30		63	77	68		60	82	63		78	62	83		50	112	111		111	66	87
Bradi1g12990		132	116	149		116	85	119		142	115	193		147	161	120		151	121	113		78	125	80
Bradi1g13000		0	0	0		0	0	0		0	0	0		0	0	0		0	1	1		0	0	1
Bradi1g13010		0	0	0		0	0	0		0	1	0		0	0	0		0	1	0		0	0	0
Bradi1g13020		2	1	2		2	1	3		0	0	0		6	6	4		3	4	2		1	2	2
Bradi1g13030		0	1	0		0	0	1		0	0	1		0	0	0		0	0	0		0	0	0
Bradi1g13040		1	2	2		1	0	0		1	0	1		0	0	6		32	1	6		1	0	0
Bradi1g13047		36	49	50		33	39	36		40	33	36		36	25	24		60	66	67		90	54	79
Bradi1g13060		381	173	1171		673	702	571		609	362	1119		1765	2192	1401		1820	1453	1795		845	778	779
Bradi1g13070		1152	1263	1905		1650	1485	1403		1825	1029	1536		2540	3108	2624		3584	2783	3516		2154	1803	2184
Bradi1g13080		172	153	190		520	493	475		365	416	448		255	296	258		137	193	201		283	216	246
Bradi1g13090		561	598	534		620	686	596		499	475	445		185	242	205		95	73	101		90	81	88
Bradi1g13097		544	554	432		626	619	639		684	606	624		835	776	777		944	847	858		1005	962	954
Bradi1g13110		0	0	0		0	1	2		0	1	1		1	1	0		0	1	1		0	1	0
Bradi1g13115		0	0	0		0	0	0		0	0	0		0	0	0		0	0	0		0	0	0
Bradi1g13121		89.53	100	68		65.5	80	60		60	45	62		44	53.39	42		98	75	66		307.5	414.56	367
Bradi1g13127		60	35	68		74	93	83		79	62	64		18	12	10		10	7	16		3	4	3
Bradi1g13140		13	15	12		9	9	13		23	16	21		20	12	15		10	8	11		7	9	12
Bradi1g13150		987	933	985		1115	1008	1006		1192	1282	1242		1462	1550	1578		1593	1729	1647		1404	1218	1477
Bradi1g13160		17	19	28		33	29	35		28	34	49		35	43	36		26	32	17		14	7	14
Bradi1g13166		12	7	16		8	6	10		24	7	12		9	6	5		11	6	13		13	19	13
Bradi1g13170		753.25	720.56	841.73		770.54	692.27	733.22		671.04	648.45	806.15		580.74	567.17	634.5		723.93	538.39	599.41		672.43	746.02	695.3
Bradi1g13180		1048	1050	1146		1003	1049	976		1031	1074	1068		912	956	1056		982	961	1212		1489	1412	1460
Bradi1g13185		9	1	0		3	4	2		2	0	5		0	4	5		4	8	9		5	5	7
Bradi1g13190		388	416	443		394	380	393		375	321	352		403	330	386		522	478	551		703	748	715
Bradi1g13200		167	112	134		149	173	133		124	98	99		90	68	76		59	74	72		382	437	418
Bradi1g13207		527	529	777		980	885	740		441	394	429		488	456	475		422	390	438		209	228	202
Bradi1g13220		332	296	285		461	468	486		470	512	573		559	627	586		488	627	567		604	519	656
Bradi1g13223		455	445.48	455.41		400.86	412.61	482.75		483	369.59	392.3		508.24	550.64	516.24		602.08	562.48	566.14		742.89	782.49	797.7
Bradi1g13226		1447	1033	1638		1040	1419	1014		1265	963	1687		578	633	706		553	489	467		2783	3038	3271
Bradi1g13232		1023	1009	1177		956	941	1021		905	926	900		682	745	685		751	871	875		1101	1029	1045
Bradi1g13240		311	294	315		176	193	142		124	139	140		86	85	99		58	87	77		189	197	162
Bradi1g13250		344	373	314		322	293	336		278	242	291		280	302	247		367	336	359		345	375	324
Bradi1g13261		1008	918	1441		936	1249	1485		1542	1236	1375		1394	1326	1239		1181	1280	1499		1690	1283	1396
Bradi1g13270		0	0	0		0	0	0		0	0	0		0	0	0		0	0	0		0	0	0
Bradi1g13280		3	5	8		4	7	7		6	6	2		3	10	9		5	5	4		9	5	8
Bradi1g13290		13161	13045.4	13784.3		13695.4	14658.5	14684.8		18193.6	22096.6	18509.5		35212.2	34055	35030.6		18072.1	23269	21031.2		24070.1	20381	25844.5
Bradi1g13300		8	2.64	2.72		9.6	3.5	10.17		21.41	19.37	12.52		7.78	12.03	4.38		3.87	0	6.82		8.9	11.02	5.54
Bradi1g13310		338	294	346		394	443	367		354	347	388		431	442	492		536	603	530		551	470	599
Bradi1g13322		11	5	12		17	22	13		16	28	26		31	14	15		21	52	34		74	43	77
Bradi1g13330		9527	11039	10401		7936	9183	8501		8137	6349	7557		6604	6701	7025		6324	6708	7289		8459	7745	7737
Bradi1g13340		462	466	557		454	428	477		555	565	631		568	568	625		588	477	485		473	456	478
Bradi1g13350		491	469	502		502	482	533		527	601	597		688	708	663		771	704	658		413	390	354
Bradi1g13352		0	0	0		0	0	0		0	0	0		0	0	0		0	0	0		0	0	0
Bradi1g13354		0	0	0		0	0	0		0	0	0		0	0	0		0	0	0		0	0	0
Bradi1g13356		12	7	3		4	2	4		8	10	5		11	8	13		8	13	11		11	4	9
Bradi1g13361		0	0	0		0	0	0		0	0	0		0	0	0		0	0	0		0	0	0
Bradi1g13367		151.16	126.55	136		160.99	156.68	146.54		169.46	188.86	139.38		221.02	184.13	219.23		163.99	265.6	212.83		284.13	223.75	326.25
Bradi1g13373		74	47	52		31	48	40		42	20	22		30	37	28		25	17	25		86	100	80
Bradi1g13380		99.3	80	100		84	93.15	93		86.33	117.17	102		104	117	112		164.38	148	123.17		143.46	158	170.18
Bradi1g13387		45	48	36		32	26	25		37	42	43		61	47	57		70	88	46		79	81	85
Bradi1g13400		0	0	0		0	0	0		0	0	0		0	0	0		0	0	0		0	0	0
Bradi1g13406		0	0	0		0	0	0		0	0	0		0	0	0		0	0	0		0	0	0
Bradi1g13412		0	0	0		0	0	0		0	0	0		0	0	0		0	0	0		0	0	0
Bradi1g13420		399	289	410		314	290	335		349	309	421		213	207	250		287	182	256		614	731	615
Bradi1g13425		4	4	7		9	5	2		7	2	6		4	4	7		16	18	13		23	28	33
Bradi1g13430		276	274	216		287	253	263		280	211	271		349	390	357		446	475	434		307	313	301
Bradi1g13440		419	286	318		351	343	444		264	313	306		616	525	597		849	1075	956		956	1004	988
Bradi1g13450		1355	1344	1358		1703	1621	1592		1741	1747	1832		2350	2341	2340		1989	2487	2174		2487	1979	2502
Bradi1g13460		8	2	2		29	20	21		2	5	3		2	5	4		0	0	0		1	4	4
Bradi1g13470		181	183	183		246	225	240		154	187	196		187	199	174		298	319	303		269	298	319
Bradi1g13475		0	0	0		0	0	0		0	0	0		0	0	0		0	0	0		0	0	0
Bradi1g13480		480	546	495		512	542	528		609	622	684		657	706	662		658	713	731		721	623	673
Bradi1g13485		0	0	0		0	0	0		0	0	0		0	0	0		0	0	0		0	0	0
Bradi1g13490		793	517	813		651	750	714		667	581	778		649	636	663		763	660	703		1091	1291	1124
Bradi1g13500		47	43	31.58		77	41.51	61		69	72.4	66		85	78.29	74.99		140.31	110	134		61	87	89
Bradi1g13505		0	0	0		0	0	0		0	0	0		0	0	0		0	0	0		0	0	0
Bradi1g13510		235	213	211.42		194	199.49	257		275	259.6	289		309	284.71	319.01		347.69	362	348		301	320	303
Bradi1g13512		6	9	2		4	3	6		11	4	2		6	7	8		2	3	1		1	4	3
Bradi1g13514		0	0	0		0	0	0		0	0	0		0	0	0		0	0	0		0	0	1
Bradi1g13516		3	2	3		28	14	12		13	12	10		8	5	7		6	0	4		1	0	0
Bradi1g13520		140	148	148		244	282	197		175	213	235		216	235	249		226	286	288		306	221	365
Bradi1g13525		6	8	3		2	3	2		4	1	11		3	5	6		5	6	2		3	5	1
Bradi1g13530		18	12	16		22	14	12		25	13	11		13	15	17		7	11	14		20	20	24
Bradi1g13541		7	8	6		3	4	2		6	4	4		2	1	1		0	4	4		5	6	4
Bradi1g13550		0	0	0		0	0	2		1	0	1		0	0	1		0	0	1		1	0	0
Bradi1g13560		0	0	0		1	0	0		0	1	1		1	0	0		0	1	0		0	1	0
Bradi1g13570		115	123	133		112	115	132		139	88	140		106	142	106		118	93	116		124	125	108
Bradi1g13580		969	994	981		1358	1278	1255		1022	1004	934		968	1024	1073		561	751	748		818	793	913
Bradi1g13590		276	249	270		308	284	316		335	299	327		288	245	247		273	290	281		323	322	354
Bradi1g13600		119	105	142		100	115	125		141	109	140		118	166	143		159	183	155		150	135	135
Bradi1g13610		0	0	1		1	1	1		0	0	0		0	0	0		0	0	0		0	0	1
Bradi1g13620		41	21	78		64	24	22		7	5	9		3	4	3		1	3	4		0	3	1
Bradi1g13630		1824	1514	1952		1579	2156	1863		1922	1595	2157		1484	1362	1460		1626	1455	1476		1888	2014	1986
Bradi1g13635		0	0	1		0	0	0		0	0	0		0	0	0		0	0	0		0	0	0
Bradi1g13640		3801	3875	3851		4781	4990	4899		5572	5697	5190		6584	6352	6376		8842	10773	8850		6122	6370	6630
Bradi1g13650		1248	1409	1241		1276	1453	1397		1155	1236	1155		809	839	874		568	684	604		849	784	833
Bradi1g13660		237	242	300		337	437	322		506	679	521		312	305	275		165	204	183		317	214	275
Bradi1g13670		388	377	523		351	419	357		483	444	379		509	472	458		365	302	294		295	277	297
Bradi1g13680		91	146	115		106	117	135		129	160	144		107	110	145		102	127	128		170	179	152
Bradi1g13690		410	389	430		398	489	432		461	430	471		522	575	574		621	742	699		492	499	603
Bradi1g13700		29	37	41		30	53	47		49	47	55		57	59	42		45	35	65		62	41	45
Bradi1g13710		927	957	1049		1039	1018	1041		1178	1274	1241		1120	1107	1165		1156	1308	1188		1105	1033	1089
Bradi1g13720		899	902	1022		1116	1135	1200		1175	1231	1395		1413	1464	1502		1761	2168	1827		1751	1352	1827
Bradi1g13730		69	62	46		47	61	45		81	65	59		112	133	113		220	192	229		375	328	354
Bradi1g13740		0	0	0		0	3	0		0	0	0		0	1	0		0	1	1		1	3	1
Bradi1g13750		139	119	166		207	233	189		181	199	226		245	236	206		247	271	260		262	295	318
Bradi1g13760		244	185	238		54	28	47		17	17	15		12	13	8		8	21	19		10	17	7
Bradi1g13765		0	0	0		0	0	0		0	0	0		0	0	0		0	0	0		0	0	0
Bradi1g13770		312	295	305		312	338	376		394	445	500		502	476	496		586	642	491		494	436	503
Bradi1g13777		1721	1664	1811		1524	1504	1584		1454	1548	1661		1499	1628	1538		1436	1459	1244		1559	1775	1629
Bradi1g13787		71	52	52		80	67	62		86	80	58		104	93	104		104	113	103		119	147	147
Bradi1g13793		0	0	0		0	0	0		0	0	0		1	0	0		0	3	1		0	0	0
Bradi1g13796		1	0	0		0	0	0		0	0	0		0	0	0		0	0	0		0	0	0
Bradi1g13800		1	0	2		17	22	13		13	5	9		1	2	0		1	0	3		0	0	0
Bradi1g13807		0	0	0		0	0	0		0	0	0		0	0	0		0	0	0		0	0	0
Bradi1g13820		0	0	0		0	0	0		0	0	0		0	0	0		0	0	0		0	0	0
Bradi1g13823		22.32	26	19.17		9.06	15.38	21.16		15.14	13.24	20.19		27.16	28.64	34.45		45.19	71.44	61.21		16.13	13.1	23.22
Bradi1g13827		529.68	509	466.83		532.94	480.62	489.84		658.86	598.76	672.81		1332.84	1139.36	1369.55		3890.81	4265.56	3928.79		1259.87	946.9	1088.78
Bradi1g13833		5	5	2		3	4	8		5	1	3		4	5	8		1	1	6		2	3	3
Bradi1g13840		57	77	82		80	94	82		101	76	81		90	91	108		90	117	115		138	95	118
Bradi1g13845		12	11	5		9	13	9		12	15	5		2	3	2		2	1	0		0	1	2
Bradi1g13850		1421	1471	1658		1566	1902	1621		1709	1594	1932		1869	1823	1944		2232	2599	2307		2320	1944	2439
Bradi1g13857		1	1	2		2	4	0		0	0	0		0	1	0		0	1	1		1	0	0
Bradi1g13862		51	40	43		51	32	43		41	45	34		60	61	48		72	64	66		58	42	53
Bradi1g13868		67	81	85		46	84	34		92	62	99		41	39	35		47	21	36		57	93	88
Bradi1g13879		24	12	19		13	14	9		10	24	13		26	24	18		22	34	34		28	39	29
Bradi1g13890		378	386	387		449	480	431		481	531	488		484	462	470		398	511	456		453	471	519
Bradi1g13900		480	531	576		483	491	460		924	1013	834		2149	1876	1992		2137	2380	2358		1050	1186	1130
Bradi1g13905		4	7	1		6	2	3		4	13	4		9	5	0		2	7	7		10	4	8
Bradi1g13910		283	314	354		370	386	336		351	296	314		232	238	265		241	282	289		395	387	401
Bradi1g13920		164	105	159		102	96	115		132	89	123		150	152	161		165	164	157		162	156	135
Bradi1g13930		750	721	783		738	842	736		824	842	1023		1065	1006	988		928	1034	1002		1236	1276	1241
Bradi1g13940		13	11	10		4	6	2		6	5	2		1	1	3		1	2	0		2	1	0
Bradi1g13950		15	16	28		11	10	21		15	15	28		24	28	38		43	45	29		21	28	29
Bradi1g13960		172	130	198		164	191	198		160	174	230		166	181	186		274	294	284		313	321	338
Bradi1g13966		0	0	0		0	0	0		0	0	0		0	0	0		0	0	0		0	0	0
Bradi1g13971		984	791	943		1237	1030	1263		1173	1271	1300		664	699	677		631	563	586		375	414	382
Bradi1g13973		0	0	0		0	0	1		1	0	0		0	0	0		0	0	0		0	0	0
Bradi1g13976		1	0	1		0	0	0		0	0	0		2	0	1		0	0	0		0	0	0
Bradi1g13980		1871	1724	1703		1265	1569	1745		1333	1449	1161		2585	2459	2478		1346	1407	1290		314	348	333
Bradi1g13983		0	0	0		1	0	0		0	0	2		1	2	0		0	0	0		0	0	0
Bradi1g13986		0	0	0		0	0	0		0	0	0		0	0	0		0	0	0		0	0	0
Bradi1g13990		136	154	160		182	190	192		551	525	393		247	330	238		108	106	103		113	99	112
Bradi1g13995		0	0	0		0	0	0		0	0	0		0	0	0		0	0	0		0	0	0
Bradi1g14000		989	893	1020		986	1047	983		1221	1291	1346		1398	1451	1467		1137	1197	1181		1017	904	1026
Bradi1g14005		0	0	0		0	0	0		0	0	0		0	0	0		0	0	0		0	0	0
Bradi1g14010		606	481	596		695	663	687		852	890	841		1039	1034	1144		971	1157	984		906	832	909
Bradi1g14020		3	5	2		2	2	0		4	5	4		2	3	2		0	0	0		0	0	0
Bradi1g14030		153	119	141		116	132	135		110	112	92		154	143	169		199	210	191		404	375	369
Bradi1g14040		1876	1820	2142		2131	1847	1938		2648	3120	3031		1737	1771	1748		1578	1615	1460		1957	1801	2152
Bradi1g14050		223	293	244		266	310	324		585	501	438		374	412	342		208	254	211		185	166	145
Bradi1g14060		27	50	19		151	118	118		94	121	81		103	105	88		40	62	30		2	7	7
Bradi1g14070		37	59	41		209	253	265		115	169	117		18	20	12		14	10	3		8	6	3
Bradi1g14080		0	0	0		0	1	0		0	0	0		0	0	0		0	0	0		0	0	0
Bradi1g14090		9	9	6		32	9	18		1	2	2		1	1	1		3	0	3		1	0	0
Bradi1g14093		533	450	566		392	478	418		469	426	547		414	425	370		387	339	336		400	477	408
Bradi1g14101		2	3	8		1	3	4		4	1	10		7	6	5		7	6	5		3	0	1
Bradi1g14110		82	141	100		75	113	97		148	120	133		99	115	98		130	131	147		175	153	170
Bradi1g14117		0	0	0		0	0	0		0	0	0		0	0	0		0	0	0		0	0	0
Bradi1g14127		538	444	561		590	603	628		695	752	889		1197	1086	1180		1353	1724	1455		1285	1135	1359
Bradi1g14140		10	6	3		1	4	2		5	5	6		10	7	8		5	8	2		4	3	1
Bradi1g14150		0	0	0		0	0	0		0	0	0		0	0	0		0	0	0		0	0	0
Bradi1g14160		139	77	113		57	93	66		46	33	45		22	29	33		12	16	16		197	256	248
Bradi1g14170		17402	12766	12889		8899	8034	9206		12306	9261	8035		34501	27724	30964		53398	43834	46631		17430	19436	17218
Bradi1g14181		18	12	8		3	2	2		6	2	11		18	4	10		29	22	18		8	13	7
Bradi1g14186		1.28	0	0		1	2.15	4		1	0	1		2	3	4		2	0	3		1.2	0	1
Bradi1g14190		5	3	0		3	4	4		6	7	8		9	9	2		8	11	5		12	8	15
Bradi1g14200		415	381	413		695	935	1069		444	593	558		1478	1409	1423		614	543	439		130	110	113
Bradi1g14210		2472	2134	2760		2150	2242	2210		2258	1985	2490		2412	2456	2541		2740	2299	2319		2103	2568	2242
Bradi1g14220		333	289	377		335	396	323		353	281	454		512	472	469		973	914	853		763	670	706
Bradi1g14230		0	1	1		4	0	0		3	4	2		2	4	7		1	2	1		1	2	1
Bradi1g14240		2	3	2		2	0	5		3	4	0		1	3	6		2	4	3		3	2	4
Bradi1g14250		730	708	818		609	627	664		735	679	811		847	898	824		1027	1066	994		1019	1047	1097
Bradi1g14260		0	0	0		0	0	0		0	0	0		0	0	0		0	0	0		0	0	0
Bradi1g14270		220	204	197		269	259	226		299	362	323		328	340	284		397	486	398		299	279	333
Bradi1g14290		586	628	757		529	619	660		777	812	895		1119	1173	1018		1201	1087	1171		918	922	898
Bradi1g14300		774	909	1002		1520	1498	1404		1849	1764	1777		1137	1260	1248		835	1054	950		944	792	939
Bradi1g14307		89	101	93		70	89	100		52	54	53		74	57	75		52	46	46		22	22	47
Bradi1g14320		664	562	676		597	683	662		666	603	730		755	763	853		868	1054	918		978	872	1041
Bradi1g14325		0	0	0		0	0	0		0	0	0		0	0	0		0	0	0		0	0	0
Bradi1g14330		1	0	0		0	0	0		3	0	0		0	0	0		0	0	0		0	0	1
Bradi1g14340		268	279	287		230	243	226		253	232	272		275	296	330		323	267	300		243	289	309
Bradi1g14343		0	0	0		0	0	0		0	0	0		0	0	0		0	0	0		0	0	0
Bradi1g14346		43	30	29		20	26	22		34	28	29		31	31	41		27	42	40		25	39	39
Bradi1g14350		493	597	587		512	478	499		578	700	641		372	385	404		232	193	211		296	261	288
Bradi1g14360		1013	1097	1144		1614	1435	1573		1494	1755	1697		1078	1224	1148		883	895	914		642	603	617
Bradi1g14370		550	590	561		898	608	768		1096	1151	1271		1080	1159	1094		768	664	752		191	168	212
Bradi1g14380		1108	1046	1407		744	921	874		1083	731	1066		1023	994	993		1340	988	1146		1062	1101	1063
Bradi1g14391		3	2	1		1	1	2		1	1	0		0	4	1		1	1	4		1	3	0
Bradi1g14400		228	211.57	218		185	207	234		207	221	237.53		228	245	237.45		262	294.51	252		269.39	241	331
Bradi1g14410		1971	1919	2223		2384	2492	2430		2960	3015	3501		3824	3519	3624		2426	2945	2634		2300	1888	2352
Bradi1g14420		264	347	352		318	287	324		308	265	333		360	399	401		404	380	362		389	399	444
Bradi1g14421		0	0	0		0	0	0		0	0	0		0	0	0		0	0	0		0	0	0
Bradi1g14422		907	810	921		700	737	712		826	609	820		1235	1273	1134		1716	1797	1519		2056	2379	2138
Bradi1g14425		96	73	88		97	101	71		76	97	67		93	69	85		113	129	122		169	205	200
Bradi1g14430		124	144	118		107	102	116		127	94	106		164	158	156		185	186	181		158	174	180
Bradi1g14440		3	2	5		3	5	5		2	3.2	2		6	6	7		4	7	9		7	9	9
Bradi1g14450		745	701	878		932	840	887		951	1100	1168		849	851	904		845	944	836		1017	911	999
Bradi1g14455		0	0	0		0	0	0		0	0	0		0	0	0		0	0	0		0	0	0
Bradi1g14460		91	99	108		114	128	133		104	87	105		70	69	75		36	55	53		72	70	71
Bradi1g14467		111	86	121		73	59	50		44	32	31		31	24	12		11	10	10		68	98	75
Bradi1g14480		78	93	113		73	62	66		85	82	98		79	70	79		55	43	35		124	135	135
Bradi1g14483		0	0	0		0	0	0		0	0	0		0	0	0		0	0	0		0	0	0
Bradi1g14486		389	269	421		207	277	263		302	259	313		279	251	252		427	311	355		360	378	365
Bradi1g14492		0	0	0		0	0	0		0	0	0		0	0	0		0	0	0		0	0	0
Bradi1g14493		0	0	0		0	0	0		0	0	1		1	0	0		0	0	0		0	0	0
Bradi1g14495		0	0	0		0	0	0		0	0	0		0	0	0		0	0	0		0	0	0
Bradi1g14497		28	30	15		23	20	21		26	22	19		30	21	28		36	26	29		27	31	24
Bradi1g14500		0	0	0		0	0	0		0	0	0		0	0	0		0	0	0		0	0	0
Bradi1g14505		54	23	32		18	18	29		24	23	32		35	30	44		60	33	49		27	34	46
Bradi1g14510		3	4	4		11	8	7		6	7	3		5	3	5		6	9	7		9	2	4
Bradi1g14517		116	96	102		139	137	151		145	156	138		174	178	171		211	257	203		151	194	200
Bradi1g14530		0	0	0		0	0	0		1	0	0		0	0	0		0	0	0		0	0	0
Bradi1g14536		23	17	41		31	34	24		31	27	29		27	36	37		72	72	73		79	87	75
Bradi1g14542		0	0	0		0	0	0		0	0	0		0	0	0		0	0	0		0	0	0
Bradi1g14550		241	269	288		307	278	252		313	352	268		280	241	265		395	384	351		334	482	441
Bradi1g14553		3	3	3		2	6	4		5	4	2		9	9	1		2	6	1		12	5	13
Bradi1g14556		0	1	0		1	1	5		2	0	0		2	1	3		0	1	0		5	0	8
Bradi1g14558		14	24	15		20	24	23		23	28	36		44	24	28		30	29	35		39	44	37
Bradi1g14560		79	54	68		64	71	80		62	74	95		113	133	103		227	264	238		387	433	500
Bradi1g14565		0	0	0		0	0	0		0	0	0		0	0	0		0	0	0		0	0	0
Bradi1g14567		0	0	0		0	0	0		0	0	0		0	0	0		0	0	0		0	0	0
Bradi1g14570		0	0	0		1	0	0		0	0	0		0	0	0		0	0	0		0	0	0
Bradi1g14572		0	0	0		0	0	0		0	0	0		0	0	0		0	0	0		0	0	0
Bradi1g14575		0	0	0		0	0	0		0	0	0		0	0	0		0	0	0		0	0	0
Bradi1g14580		2277	3028	2011		2448	1758	1421		3336	4185	939		302	485	640		84	94	227		300	258	795
Bradi1g14590		2015	1894	2072		2645	2557	3041		4291	4465	4279		6585	6217	6460		4267	4380	3759		2618	2545	2519
Bradi1g14600		3	3	2		4	3	8		3	2	2		1	3	0		0	0	5		0	1	1
Bradi1g14606		0	2	5		3	4	5		5	3	3		5	12	5		2	3	0		1	1	0
Bradi1g14608		0	0	0		0	0	0		0	0	0		0	0	0		0	0	0		0	0	0
Bradi1g14610		91	86	116		103	103	112		87	75	116		146	146	148		173	159	174		215	213	171
Bradi1g14615		0	0	0		0	2	0		2	1	0		0	1	0		0	0	0		3	0	1
Bradi1g14620		5	12	15		13	15	21		17	9.7	19		10	10	18.37		8	7	11		11.02	9	15
Bradi1g14630		368	295	293		468	441	394		345	411.3	428		438	511	527.63		508	723	618		717.98	607	755
Bradi1g14650		18	29	14		28	18	21		37	39	29		31	28	41		23	25	27		3	9	3
Bradi1g14660		240	246	245		251	231	234		266	268	305		342	369	343		319	363	287		355	336	409
Bradi1g14670		427	354	510		319	401	331		378	311	500		419	437	393		548	470	435		503	536	467
Bradi1g14677		86	95	101		93	81	88		97	91	85		120	112	99		146	137	114		131	190	130
Bradi1g14690		287	327	269		304	275	328		273	276	360		354	349	361		400	369	374		361	341	343
Bradi1g14700		1602	1660	2012		1956	2234	2118		2053	2247	2263		1989	2038	2015		582	589	529		1534	1286	1389
Bradi1g14710		1928	1935	1720		1943	1849	1820		1494	1504	1577		940	951	984		833	763	794		1929	1964	1989
Bradi1g14720		175	185	154		262	256	273		327	322	277		223	200	182		192	199	234		239	246	265
Bradi1g14730		710	580	766		791	800	882		762	805	929		875	908	871		804	881	898		1018	936	971
Bradi1g14740		6	2	6		12	10	9		19	16	21		40	36	42		34	41	38		20	18	16
Bradi1g14745		1316	1216	1253		978	828	963		922	730	727		793	794	829		1341	1211	1341		1372	1631	1337
Bradi1g14750		1378	1141	1556		744	803	807		532	336	436		902	778	765		966	844	705		448	493	425
Bradi1g14760		311	315	307		328	218	287		200	259	252		345	326	350		403	490	442		317	261	286
Bradi1g14770		402	378	379		349	429	427		473	563	543		598	602	608		622	790	718		651	485	643
Bradi1g14780		1079	1763	750		289	241	208		159	100	81		189	146	154		338	310	294		424	486	447
Bradi1g14790		225	197	286		182	181	194		242	183	215		242	274	277		434	380	398		427	393	412
Bradi1g14800		8	8	6		21	37	27		20	28	21		12	11	18		9	5	8		9	6	4
Bradi1g14810		36	55	24		34	29	34		24	25	23		55	54	43		112	96	120		74	49	82
Bradi1g14815		2	0	0		1	0	2		2	0	1		4	3	1		0	1	2		0	1	0
Bradi1g14820		21	15	24		11	23	16		14	12	12		11	9	10		5	8	7		9	1	3
Bradi1g14830		2107	1954	1941		2167	1987	2135		1962	2140	2249		1938	2219	1863		2426	2535	2150		2039	1999	2129
Bradi1g14835		770	807	704		761	714	826		617	582	666		689	659	658		612	528	577		1006	1030	1038
Bradi1g14840		11	7	9		21	21	14		10	8	9		0	2	1		1	1	1		2	3	6
Bradi1g14845		1	1	2		0	0	1		0	0	1		0	0	0		0	1	0		0	0	0
Bradi1g14850		202	135	250		210	192	130		120	106	155		82	112	82		50	49	56		144	118	143
Bradi1g14855		14	19	6		7	14	15		14	16	14		25	18	8		35	23	23		19	18	15
Bradi1g14860		904	938	956		824	767	750		853	948	906		1627	1694	1560		1155	1288	1182		1641	1615	1398
Bradi1g14863		3	1	0		3	1	1		1	0	0		5	11	9		11	17	8		6	12	6
Bradi1g14870		0	0	1		0	0	0		0	0	0		0	0	0		0	0	0		0	0	0
Bradi1g14877		1	0	1		1	1	0		1	1	1		0	0	1		0	0	0		1	0	2
Bradi1g14890		1	1	3		0	1	0		0	0	1		6	7	3		10	11	4		5	5	6
Bradi1g14900		264	251	229		302	173	119		159	51	140		299	258	227		701	714	708		439	468	561
Bradi1g14910		189	175	186		187	153	138		214	186	212		287	308	294		405	457	445		295	282	339
Bradi1g14915		0	0	0		0	0	0		0	0	0		0	0	0		0	0	0		0	0	0
Bradi1g14927		1	1	1		2	1	0		2	0	0		1	3	1		2	5	1		2	0	2
Bradi1g14940		805	865	854		887	865	1001		1149	1164	1222		1520	1516	1484		1280	1411	1273		859	815	931
Bradi1g14950		17	20	31		13	18	15		11	19	18		22	14	17		13	16	14		20	23	30
Bradi1g14960		170	162	166		192	203	198		185	199	208		272	231	219		301	324	299		291	286	289
Bradi1g14965		88	68	104		80	96	59		74	59	88		43	32	57		53	38	47		233	249	271
Bradi1g14971		0	0	0		0	0	0		0	0	0		0	0	0		0	1	0		0	0	0
Bradi1g14976		84	65	96		156	124	140		100	134	114		112	133	125		109	196	119		160	97	169
Bradi1g14978		4	3	5		3	2	3		2	1	3		1	8	5.13		4	10	11		6.05	11	7
Bradi1g14980		300	241	291		392	348	377		378	378	241		276	295	257		383	376	336		176	158	196
Bradi1g14983		6377	5901	7786		9325	8245	8493		6916	7355	5894		3445	4111	3562		3491	3429	3265		1434	1324	1279
Bradi1g14986		1169	1048	1293		818	763	916		944	798	976		977	981	923		1220	887	1073		996	1147	796
Bradi1g14990		584	468	647		459	592	493		679	560	638		965	894	920		1457	1133	1303		827	923	896
Bradi1g15000		132	124	125		114	123	135		110	113	110		154	181	188		235	256	195		206	207	230
Bradi1g15010		486	370	553		391	546	344		407	280	475		363	338	346		434	477	516		1036	1037	1268
Bradi1g15020		93	76	87		88	116	94		93	95	103		101	122	115		96	145	125		240	198	276
Bradi1g15030		401	487	257		118	176	197		254	171	169		1493	1217	1829		872	1043	858		391	356	367
Bradi1g15035		13	19	10		8	5	7		8	6	3		36	23	47		12	15	17		4	5	2
Bradi1g15040		268	224	239		228	287	273		273	242	306		314	291	315		470	399	380		381	432	346
Bradi1g15050		9936	8881	12234		12631	14089	14115		16706	18415	19634		10930	10734	11219		4172	3878	4307		4485	3834	4337
Bradi1g15055		5	7	10		9	3	8		11	11	7		12	13	9		2	8	3		3	2	4
Bradi1g15060		749	763	774		868	754	916		883	1076	955		904	792	963		911	1025	909		1262	1171	1247
Bradi1g15065		0	0	0		0	0	0		0	0	0		0	0	0		0	0	0		0	0	0
Bradi1g15070		1292.72	1322.29	1496.32		2031.7	1974.16	2013.98		1917.77	2060.73	2086.01		1846.62	1704.17	1843.3		1811.86	1847.4	1919.63		1569.21	1405.93	1560.98
Bradi1g15090		73.28	88.71	69.68		48.3	48.84	71.02		86.23	49.27	72.99		108.38	101.83	118.7		113.14	107.6	119.37		96.79	139.07	120.02
Bradi1g15100		52	59	32		33	42	49		46	53	46		75	61	71		90	70	80		90	97	81
Bradi1g15110		599	659	845		713	759	739		755	674	905		890	1055	977		1157	1196	1162		1166	1039	1258
Bradi1g15120		616	695	528		692	665	699		743	731	689		545	605	617		498	513	497		858	833	1014
Bradi1g15123		0	0	0		0	0	0		0	0	0		0	0	0		0	0	0		0	0	0
Bradi1g15126		197	231	161		157	171	190		171	154	131		98	125	117		100	103	104		123	108	144
Bradi1g15130		1	0	0		0	1	0		0	0	2		0	0	0		0	0	0		0	0	0
Bradi1g15140		2800	2691	3113		2327	2327	2051		2355	2026	2474		2524	2697	2615		3320	3095	2922		3059	3343	3356
Bradi1g15150		6	5	11		10	7	18		6	9	10		9	11	11		7	8	8		2	0	4
Bradi1g15161		16	11	25		25	19	9		8	8	13		12	14	13		14	9	10		19	45	40
Bradi1g15170		3733	3219	3520		2635	2694	2702		2491	1819	1968		1426	1305	1542		1621	1293	1435		5339	7070	5673
Bradi1g15180		539	436	541		378	394	417		463	379	448		540	518	500		754	708	716		581	727	669
Bradi1g15190		9	17	17		20	15	21		53	67	90		297	290	280		643	729	743		267	213	231
Bradi1g15201		0	0	0		0	0	0		0	0	0		0	0	0		0	0	0		0	0	0
Bradi1g15215		0	0	0		0	0	0		0	0	0		0	0	0		0	0	0		0	0	0
Bradi1g15230		0	2	0		2	3	0		6	4	3		11	10	7		4	5	7		3	4	4
Bradi1g15242		3	2	0		0	1	1		3	6	2		4	6	4		3	2	5		1	3	1
Bradi1g15252		2	1	0		2	1	0		0	0	0		1	0	0		0	0	0		2	0	0
Bradi1g15260		77	89	83		148	145	145		112	117	168		100	105	122		70	106	99		146	109	160
Bradi1g15270		366	345	320		689	731	597		489	619	580		636	642	687		527	1072	813		1336	804	1400
Bradi1g15280		218	208	202		188	196	189		217	220	183		206	218	206		253	216	239		243	280	238
Bradi1g15290		92888	122274	88425		97456	91865	100688		82687	79401	58050		54950	57066	56582		15415	15071	21762		3189	3883	3465
Bradi1g15291		0	2	1		3	4	3		2	1	2		3	0	1		0	1	0		0	0	0
Bradi1g15292		0	0	0		0	0	0		0	0	0		0	0	0		0	0	0		0	0	0
Bradi1g15295		0	2	0		1	0	0		0	0	0		0	0	0		0	0	0		0	0	0
Bradi1g15297		83	120	102		122	126	102		268	260	275		43	53	46		5	12	6		1	2	2
Bradi1g15300		160	172	146		142	115	142		130	108	135		213	234	245		242	200	235		245	239	237
Bradi1g15310		22	21	34		24	18	21		24	22	31		38	37	43		50	42	50		58	28	57
Bradi1g15317		176	143	196		154	162	123		173	146	178		238	229	242		257	278	287		254	295	340
Bradi1g15330		18	19	26		25	14	24		19	31	21		17	20	37		23	23	16		29	30	41
Bradi1g15340		375	322	333		301	328	353		273	306	308		399	331	380		413	471	425		422	399	399
Bradi1g15345		0	0	0		0	0	0		0	1	0		0	0	0		0	0	0		0	0	0
Bradi1g15350		1623	1458	1861		1327	1438	1493		1260	1154	1311		938	1032	912		808	699	717		954	1040	969
Bradi1g15360		491	467	474		553	552	610		615	568	674		802	698	760		1006	990	1006		777	738	776
Bradi1g15370		699	667	689		798	1019	795		833	799	1004		924	970	1022		1080	1521	1175		1781	1296	1698
Bradi1g15377		1235	1211	1158		1251	1176	1217		1067	1054	1236		1080	1204	1219		1389	1627	1448		2959	2512	3008
Bradi1g15390		1648.42	1521.51	1850.24		1294.6	1369.08	1536.98		1413.98	1271.17	1561.46		1774.67	1845.98	1823.88		2088.37	1509.34	1907.34		1785.66	2208.23	1852.81
Bradi1g15400		1888.58	1880.49	2235.76		2564.4	2601.92	2591.02		2705.02	2813.83	2901.54		10897.3	9706.02	10787.1		14841.6	15906.7	17737.7		7131.34	5621.77	5733.19
Bradi1g15410		161	176	189		187	198	165		199	194	252		323	320	318		469	548	498		288	273	278
Bradi1g15420		29	36	25		36	34	39		49	43	33		47	38	44		36	42	33		42	53	34
Bradi1g15430		1225	1063	1273		1228	1201	1258		976	896	987		2442	2278	2440		4606	4973	5207		4199	4021	4146
Bradi1g15440		229	224	282		351	336	315		449	443	506		605	652	629		477	549	556		509	409	552
Bradi1g15450		5250	4971	4162		4409	3422	3563		2635	2414	2286		3719	3445	4058		3095	3157	3049		3413	3630	3396
[truncated: 32,313 more rows]
