# Supplementary material for: Time-series transcriptome of Brachypodium distachyon during bacterial flagellin-induced pattern-triggered immunity
Source: Front Plant Sci. 2022 Sep 15;13:1004184. doi: 10.3389/fpls.2022.1004184 (PMC9521188; doi:10.3389/fpls.2022.1004184)
Supplement: Supplementary file 5 [file Table_4.xlsx]

## Sheet: TableS4
Supplementary Table S4. List of differentially expressed genes (DEGs) of Brachypodium distachyon showing differences between any of the time points at 0, 0.5, 1, 3, 6, and 12 hours after treatment (hat) with flg22
DEGs	logFC (0.5 h)	logFC (1 h)	logFC (3 h)	logFC (6 h)	logFC (12 h)	logCPM	F	p-value	FDR
Bradi1g00247	0.730153	0.435643	-0.656905	-0.754196	-0.898428	2.45079	33.3731	1.47e-08	4.52e-08
Bradi1g00260	0.166019	-0.00225065	0.490309	0.942767	0.890621	3.59125	27.562	6.77e-08	1.79e-07
Bradi1g00266	0.1788	0.0583197	0.329799	0.888437	0.666575	1.85186	9.30293	0.000155991	0.00021876
Bradi1g00341	-0.133749	-0.581566	-0.880623	0.0968295	-0.0407964	2.42104	6.88462	0.000908385	0.00114674
Bradi1g00370	-0.00561464	0.263939	0.0497378	0.0720159	1.22178	4.49801	35.6648	8.57e-09	2.79e-08
Bradi1g00417	0.469881	0.612357	0.568113	0.732567	0.583905	3.82194	5.3321	0.00343888	0.00404494
Bradi1g00427	0.386648	0.540728	0.70335	0.919344	0.991735	2.75482	9.32818	0.000153399	0.000215368
Bradi1g00450	0.238015	0.642284	0.298899	0.109159	-0.121476	5.78674	26.0394	1.06e-07	2.67e-07
Bradi1g00460	0.301437	0.432784	0.657835	0.463671	0.759701	4.25996	17.5013	2.15e-06	4.16e-06
Bradi1g00480	0.595572	0.454684	0.338874	0.520554	1.08362	5.26933	12.0891	3.57e-05	5.53e-05
Bradi1g00497	-0.0758033	-0.143072	0.00554039	0.424951	-0.0999996	5.87085	17.9377	1.8e-06	3.52e-06
Bradi1g00510	0.267278	0.208216	0.366686	0.464247	0.415713	4.26857	5.26915	0.00364429	0.0042722
Bradi1g00517	0.17086	0.201267	0.643155	1.03299	1.02246	5.29313	40.3509	3.12e-09	1.13e-08
Bradi1g00530	0.20754	0.0749556	-0.0866982	0.305739	0.829462	4.0596	32.2763	1.92e-08	5.75e-08
Bradi1g00540	0.140518	-0.298685	-0.174382	-0.879791	-0.379973	2.59573	14.3782	8.79e-06	1.51e-05
Bradi1g00560	0.134946	-0.351663	-1.45033	-2.30764	-1.48086	5.2384	78.0181	2.75e-11	1.81e-10
Bradi1g00563	-1.15198	-1.4415	-2.01419	-2.68633	-3.07744	1.36104	14.137	1.5e-05	2.48e-05
Bradi1g00580	0.212218	0.232241	0.307705	0.298267	0.587127	5.65103	8.61686	0.000248896	0.000339036
Bradi1g00587	0.904415	0.415807	0.376435	0.370534	0.538168	3.44838	14.5471	8.1e-06	1.4e-05
Bradi1g00620	-0.153905	-0.618733	-0.453437	-0.318864	0.240577	3.62387	4.91454	0.00552313	0.0063499
Bradi1g00666	0.35915	-1.57098	-0.911022	-3.2317	-4.67191	4.59132	92.2423	6.59e-11	3.84e-10
Bradi1g00678	0.618778	0.249571	-0.186364	-0.488229	-0.767326	4.6129	34.2665	1.19e-08	3.73e-08
Bradi1g00690	0.0442372	0.0222039	-0.770777	-0.94299	-0.236793	4.42588	32.1607	1.98e-08	5.91e-08
Bradi1g00700	0.911837	1.0646	0.830444	0.349479	-0.348873	9.65697	92.6988	2.64e-12	2.5e-11
Bradi1g00740	-0.770116	-1.2037	-0.680457	-0.0566934	-0.108689	4.26942	30.1663	3.31e-08	9.32e-08
Bradi1g00750	-0.157767	-0.61729	-0.448383	-0.593697	0.729491	5.81952	70.6338	2.77e-11	1.82e-10
Bradi1g00760	-0.0648934	-0.307393	-0.74717	-0.947614	-0.260672	4.10662	12.938	1.82e-05	2.96e-05
Bradi1g00820	0.10754	0.160285	0.357489	0.422637	0.102475	5.32394	8.31711	0.000307577	0.000413649
Bradi1g00830	0.223095	-0.155724	-1.25313	-2.04026	0.514528	3.59842	96.1209	1.92e-12	1.91e-11
Bradi1g00840	-0.775621	-1.09026	-1.00901	-0.835511	-0.16099	2.16795	8.4106	0.000287777	0.000388807
Bradi1g00847	0.0206324	-0.0805762	0.490279	0.907217	0.457502	5.20677	45.2072	1.22e-09	4.89e-09
Bradi1g00860	0.0598733	0.0127022	0.402886	0.63267	0.247257	5.47545	27.5905	6.72e-08	1.78e-07
Bradi1g00887	0.0988839	0.159794	0.178508	0.436986	0.607206	6.35046	17.8187	1.89e-06	3.69e-06
Bradi1g00900	-1.16259	-1.60671	-0.856623	-0.586623	-0.99585	5.02253	11.7098	9.33e-05	0.000135198
Bradi1g00910	-0.584986	-0.104467	0.46316	0.97372	0.0302213	5.14953	44.337	1.43e-09	5.65e-09
Bradi1g00940	-0.0388261	-0.515833	-2.31877	-4.20389	-0.802688	7.54708	321.757	4.19e-17	6.7e-15
Bradi1g00960	0.122448	-0.172416	0.473813	0.576854	0.746778	3.52515	13.0131	1.75e-05	2.85e-05
Bradi1g00970	-0.747913	-0.974703	-0.19361	0.0467988	-2.67615	2.30654	55.0187	2.34e-10	1.16e-09
Bradi1g00980	-0.0684754	-0.0832522	1.41252	2.37785	0.0592697	7.82602	146.267	6e-14	1.18e-12
Bradi1g00990	-0.013565	0.181541	0.257597	0.321781	0.0660162	5.63152	5.02711	0.00456966	0.00530371
Bradi1g01000	-0.244739	-0.126153	0.0662864	0.284431	0.466156	3.4566	6.68784	0.00106483	0.00133211
Bradi1g01007	-0.0314549	-0.238274	-0.0339095	0.341968	0.536981	2.42095	6.03123	0.00184581	0.00224002
Bradi1g01014	-0.267011	-0.259694	-0.252234	-0.279737	-0.645303	5.83691	6.83772	0.000943223	0.00118857
Bradi1g01021	0.543472	0.794762	-0.344619	0.264981	3.05292	3.93501	25.3581	1.85e-06	3.62e-06
Bradi1g01047	-0.0416723	0.0984263	0.408876	0.511061	-0.141571	6.80088	17.2538	2.39e-06	4.58e-06
Bradi1g01080	-0.117196	0.386808	0.541246	0.23348	0.515916	6.13901	14.6438	7.73e-06	1.34e-05
Bradi1g01090	0.357124	0.67479	0.0168977	-0.804715	-0.836322	6.56649	91.5854	2.93e-12	2.75e-11
Bradi1g01110	0.0704315	-0.238968	-0.103908	0.64854	0.321645	3.85417	15.0897	6.26e-06	1.11e-05
Bradi1g01130	0.0658147	0.11195	0.408228	0.774166	0.216374	5.9457	32.0114	2.06e-08	6.1e-08
Bradi1g01140	-0.0176096	-0.0813906	0.220571	0.654327	0.767225	3.2639	14.3395	8.96e-06	1.54e-05
Bradi1g01170	-0.0875324	0.0914093	0.413688	0.351905	0.357672	4.96578	16.3036	3.6e-06	6.67e-06
Bradi1g01200	0.162049	0.090579	0.443054	0.831712	0.740297	2.91863	14.3386	8.96e-06	1.54e-05
Bradi1g01220	-0.542979	-0.576638	0.537885	0.92713	0.310349	2.35633	27.1509	7.62e-08	1.99e-07
Bradi1g01250	-0.102095	-0.0926907	0.730903	1.39334	1.62759	4.40155	94.4563	2.24e-12	2.18e-11
Bradi1g01257	0.370254	0.583833	0.886907	0.959902	0.727355	4.78206	15.8497	4.41e-06	8.04e-06
Bradi1g01290	-0.282448	-0.116795	0.497685	0.110516	0.0215988	5.79492	31.982	2.07e-08	6.14e-08
Bradi1g01310	0.372488	0.570296	-2.25134	-4.63411	-4.35789	5.00992	715.344	3.09e-20	7.1e-17
Bradi1g01320	-0.544253	-0.513729	-0.146077	0.0516428	-0.0518838	3.84655	6.80857	0.000965616	0.00121555
Bradi1g01363	-0.0593957	-0.458529	-0.301258	-0.0472197	0.989822	3.05069	21.4041	4.8e-07	1.05e-06
Bradi1g01407	0.364622	0.363271	0.727854	0.587203	1.38829	2.26708	11.3594	4.36e-05	6.66e-05
Bradi1g01420	0.22289	-0.122908	-0.442348	-0.54359	0.457313	3.98856	17.8495	1.86e-06	3.64e-06
Bradi1g01432	0.739137	0.914144	0.871908	1.19269	2.11323	1.9916	15.2985	5.68e-06	1.01e-05
Bradi1g01460	-0.151859	-0.0809176	1.29165	2.1455	0.313625	4.75306	213.754	1.64e-15	8.28e-14
Bradi1g01480	-0.179746	-0.544041	-1.21367	-0.953662	0.277426	6.71206	57.0655	1.72e-10	8.82e-10
Bradi1g01487	0.202114	0.137606	0.190679	0.539451	0.145208	3.74565	5.29456	0.0035598	0.00417923
Bradi1g01500	-0.0350957	0.0507151	0.747587	0.791566	-0.0526586	5.46839	27.094	7.75e-08	2.02e-07
Bradi1g01507	-0.153094	-0.396331	-0.271063	-0.411032	-0.170206	5.14001	6.84896	0.000934742	0.00117862
Bradi1g01560	-0.0548657	-0.121437	-0.333968	-0.501452	-0.33995	6.63823	18.2365	1.59e-06	3.16e-06
Bradi1g01570	-0.119096	-0.217503	-0.416851	-0.524193	-0.402388	7.11086	8.61273	0.000249616	0.00033993
Bradi1g01610	0.420468	0.364283	0.495025	-0.707618	-2.30565	2.77491	28.3392	6.87e-08	1.81e-07
Bradi1g01620	-0.0250935	-0.144896	0.303219	0.42905	1.00166	4.51045	33.4356	1.45e-08	4.45e-08
Bradi1g01630	-0.475337	-0.594753	-1.48243	-2.73419	-0.784186	2.95775	88.1433	4.09e-12	3.63e-11
Bradi1g01660	0.148386	0.133363	0.555182	1.39555	1.03042	6.43012	127.273	1.64e-13	2.56e-12
Bradi1g01693	0.514353	0.594578	0.1488	0.423563	1.16209	2.03272	8.97911	0.000193917	0.000268254
Bradi1g01700	0.404771	0.540656	0.893271	2.70153	4.42492	0.679795	51.4289	4.13e-10	1.9e-09
Bradi1g01710	-0.0979531	-0.0247583	-0.00948768	-0.162106	-0.345791	4.53648	4.6148	0.00680127	0.00774252
Bradi1g01720	-0.0225072	-0.346711	-0.225121	0.0420469	0.230101	3.83979	7.46623	0.00057648	0.000744081
Bradi1g01730	0.560854	0.532845	0.298945	0.264825	-0.137487	4.88322	22.5658	3.21e-07	7.29e-07
Bradi1g01740	0.0574871	0.591592	0.402131	-0.0924798	-0.263634	5.35115	23.733	2.18e-07	5.13e-07
Bradi1g01750	0.821642	0.59177	-0.841096	-1.17222	-1.78347	6.77167	182.784	6.62e-15	2.25e-13
Bradi1g01770	-0.174954	-0.479897	-0.632229	-0.420166	0.0703075	4.6661	17.3061	2.34e-06	4.49e-06
Bradi1g01780	0.0439138	0.336653	0.856324	1.53019	0.331509	3.8008	42.6536	1.97e-09	7.5e-09
Bradi1g01790	0.598144	-0.22344	-0.293513	-0.0120864	-1.4753	4.25335	59.1875	1.26e-10	6.71e-10
Bradi1g01800	0.0356985	-0.513329	-1.53029	-1.01447	-0.365092	6.41738	71.761	2.42e-11	1.62e-10
Bradi1g01802	0.10402	-0.0788628	0.101403	-0.155984	0.542168	2.77536	10.4244	7.62e-05	0.000111946
Bradi1g01810	0.118227	0.260107	-0.100217	0.531942	1.34561	2.82652	13.7163	1.31e-05	2.19e-05
Bradi1g01820	-0.162374	-0.150615	-0.874555	-1.23176	0.116224	2.97416	20.3377	7.06e-07	1.5e-06
Bradi1g01830	-0.224368	-0.0306685	-0.416261	-0.422421	-0.554954	5.40922	12.9262	1.83e-05	2.98e-05
Bradi1g01840	0.01628	0.0800662	0.00243492	-0.2149	-1.18918	7.3765	89.0464	3.74e-12	3.38e-11
Bradi1g01847	0.130562	0.0308191	0.218738	0.467027	0.789214	5.47244	36.3224	7.39e-09	2.45e-08
Bradi1g01870	0.137756	1.31359	0.0416243	-1.04492	-1.29385	6.84799	60.3276	5.7e-10	2.53e-09
Bradi1g01880	0.111985	-0.352839	-1.28723	-2.70524	-0.703228	6.7384	227.163	9.51e-16	5.81e-14
Bradi1g01900	-0.193329	-0.131895	-0.260468	0.506809	0.773618	3.78662	21.965	3.94e-07	8.79e-07
Bradi1g01930	0.450977	0.480659	-0.21362	0.00774452	0.149963	4.52862	19.8492	8.48e-07	1.77e-06
Bradi1g01936	0.459301	-0.0181241	-0.422888	-0.288348	-0.763515	5.66293	81.3325	8.22e-12	6.55e-11
Bradi1g01948	-0.447726	0.0919173	0.281323	0.170952	-0.408191	2.99889	6.35147	0.00140592	0.00173098
Bradi1g02000	0.208635	0.270377	0.129114	0.190219	0.392202	5.07139	5.57362	0.00276127	0.0032839
Bradi1g02020	-0.0722098	-0.0553645	0.0580756	0.31116	0.3076	6.72908	8.70609	0.000233909	0.000319867
Bradi1g02030	-0.280469	-0.593095	-1.7376	-3.42575	-0.0359652	6.59301	140.57	1.18e-13	1.97e-12
Bradi1g02056	-0.0864872	-0.0238647	-0.729879	0.239457	-0.605266	2.79903	10.5504	7.05e-05	0.000104215
Bradi1g02060	0.102327	0.449275	0.378517	0.237784	0.0842365	7.36423	7.35446	0.000628069	0.000807367
Bradi1g02080	-0.614746	-1.09012	-0.7237	-0.870297	-0.115642	4.32308	29.5099	3.94e-08	1.09e-07
Bradi1g02100	-0.19483	-0.297032	0.249582	0.568731	-0.395728	5.82109	61.0344	9.69e-11	5.37e-10
Bradi1g02117	0.102065	0.44088	0.377616	0.343496	0.370014	3.27412	4.6635	0.00648381	0.00740153
Bradi1g02145	0.317559	0.980935	1.13902	1.19441	1.27488	2.57507	20.8593	5.84e-07	1.26e-06
Bradi1g02150	0.216413	-0.217753	-1.81499	-3.89065	-0.0466085	4.4081	267.064	2.23e-16	1.99e-14
Bradi1g02160	-0.135	-0.405935	0.2399	0.293366	0.469264	5.13882	23.0921	2.69e-07	6.21e-07
Bradi1g02170	-0.286305	-0.202098	-0.527942	-0.269818	-0.266426	5.21457	5.26482	0.00365891	0.00428872
Bradi1g02210	1.32027	0.641728	-0.355636	-0.505615	-0.741644	2.89393	91.2867	3.01e-12	2.81e-11
Bradi1g02220	-0.413645	-0.318223	-0.267914	-0.348584	-0.652225	6.95589	8.93319	0.000200078	0.000276285
Bradi1g02247	-0.0246355	0.422351	0.323712	0.445535	-0.107916	3.64811	12.9387	1.82e-05	2.96e-05
Bradi1g02270	0.0495734	0.0959163	0.892117	1.16863	0.378276	8.91718	75.6952	1.53e-11	1.1e-10
Bradi1g02273	0.335176	-0.669436	-0.376119	0.0398034	-1.06163	2.29916	11.3379	4.41e-05	6.74e-05
Bradi1g02280	0.739691	0.678153	0.162254	0.486076	0.676232	5.88496	32.2546	1.93e-08	5.78e-08
Bradi1g02350	0.112897	0.292048	0.482767	0.402336	0.439726	4.25578	6.51661	0.0012254	0.00151971
Bradi1g02370	0.0626137	-0.132112	0.130783	1.07574	0.931099	2.91068	16.0497	4.03e-06	7.4e-06
Bradi1g02380	0.105231	-0.0382693	0.00267237	0.470451	0.639388	4.85352	27.6405	6.62e-08	1.75e-07
Bradi1g02390	0.41072	0.159758	-0.487413	-0.116591	-0.770486	4.47894	59.636	1.18e-10	6.37e-10
Bradi1g02400	-0.190235	-0.80541	-1.14398	-1.38402	-0.594988	5.50883	82.7751	7.05e-12	5.76e-11
Bradi1g02420	-0.0204854	1.55815	2.04769	1.27541	0.0866141	5.61191	90.4956	5.09e-12	4.39e-11
Bradi1g02440	1.27628	0.703604	0.071929	0.184663	-0.625994	6.46275	18.7415	5.84e-06	1.04e-05
Bradi1g02450	-0.305958	-1.02648	-0.962036	-1.1903	0.466276	4.98894	163.683	1.77e-14	4.61e-13
Bradi1g02480	-0.107187	-0.0101855	0.125861	0.529134	0.602516	4.96701	18.2668	1.57e-06	3.12e-06
Bradi1g02490	0.109283	-0.0516807	0.0254479	0.313083	0.341584	6.08938	13.2135	1.58e-05	2.59e-05
Bradi1g02505	-0.115551	0.166809	0.5134	0.932447	1.26565	1.91545	25.7427	1.16e-07	2.9e-07
Bradi1g02510	0.170491	-0.200745	-1.20725	-1.12914	-0.762746	8.13714	97.6585	1.67e-12	1.7e-11
Bradi1g02517	-0.11364	-0.516426	-0.313034	0.255085	0.355219	4.36112	27.0656	7.82e-08	2.03e-07
Bradi1g02540	-0.215673	0.0747319	-0.0503583	0.475117	0.0246446	4.40199	9.99152	9.98e-05	0.000143995
Bradi1g02550	-0.351937	-1.50303	-2.84372	-4.34156	-0.751776	5.74989	253.682	4.67e-16	3.5e-14
Bradi1g02560	0.823519	0.349536	0.13084	-0.0307869	-0.460785	4.92922	42.8254	1.91e-09	7.27e-09
Bradi1g02570	0.209631	0.160915	0.903654	1.21127	-0.300372	5.92213	150.681	3.68e-14	7.86e-13
Bradi1g02580	0.0700633	0.253888	0.151117	-0.29793	-0.460775	6.11679	42.5286	2.02e-09	7.66e-09
Bradi1g02597	0.155263	0.369235	0.945684	0.395499	-0.0349752	6.25135	57.8492	1.53e-10	7.97e-10
Bradi1g02610	-0.0860873	-0.0512883	0.412974	0.430968	0.149757	4.95966	17.5798	2.08e-06	4.04e-06
Bradi1g02621	-0.0117165	-0.104652	-0.195155	0.521918	0.713968	4.56242	21.2821	5.01e-07	1.1e-06
Bradi1g02630	-0.0882051	0.000656217	0.212117	1.03512	0.50364	5.84296	68.8907	3.44e-11	2.19e-10
Bradi1g02635	0.10711	0.234184	0.440563	0.366359	0.88286	7.81742	15.5267	5.11e-06	9.19e-06
Bradi1g02640	-0.293211	-0.300879	-0.100675	0.58094	0.107502	5.6825	16.4315	3.48e-06	6.47e-06
Bradi1g02650	-0.494866	-0.39732	-0.296989	-0.00607745	-0.311787	5.31337	5.15494	0.00413284	0.00481895
Bradi1g02680	0.849502	0.48099	0.575278	-0.201296	0.503244	5.08629	8.44685	0.00043188	0.000568007
Bradi1g02697	-0.192326	-0.417184	0.234694	-7.65e-05	0.917363	2.0075	12.2109	2.7e-05	4.26e-05
Bradi1g02710	0.116476	0.358383	0.114009	-0.602147	-0.867171	4.3287	21.1064	5.34e-07	1.16e-06
Bradi1g02720	-0.160247	-0.623298	0.164717	0.182648	1.35082	2.52933	40.562	2.99e-09	1.08e-08
Bradi1g02730	0.266911	0.685264	1.80927	2.38804	0.0243962	3.5119	94.6227	2.2e-12	2.15e-11
Bradi1g02750	-0.518083	-0.553213	0.085291	0.148567	-1.06355	1.95183	7.91233	0.000412555	0.000544682
Bradi1g02760	0.147212	0.090173	0.396136	0.53251	0.6912	5.67348	22.5402	3.24e-07	7.35e-07
Bradi1g02770	0.214146	0.00661921	-0.734745	-0.618944	0.168131	6.50509	24.0418	1.97e-07	4.7e-07
Bradi1g02780	0.148837	0.000944762	0.770151	0.94908	0.703683	3.04529	26.2146	1e-07	2.55e-07
Bradi1g02800	0.435117	0.933013	1.46692	1.84976	0.931266	5.5096	107.223	7.39e-13	8.71e-12
Bradi1g02805	-0.792812	-0.253255	0.472772	0.359954	-0.625887	2.2688	9.72226	0.000118548	0.000169228
Bradi1g02810	0.226498	0.441517	1.54038	2.10642	1.67719	5.77474	301.645	7.48e-17	9.87e-15
Bradi1g02840	-0.175009	-0.172043	0.431135	0.503463	0.584625	2.45601	12.9417	1.82e-05	2.96e-05
Bradi1g02880	0.0064897	-0.0733491	0.620016	0.995526	0.533796	3.80692	55.65	2.12e-10	1.06e-09
Bradi1g02890	0.0153977	0.0784396	0.815373	0.952694	1.29221	2.15597	14.5433	8.12e-06	1.41e-05
Bradi1g02910	-0.133372	0.0299488	0.836408	0.713697	1.07117	2.27588	16.6578	3.08e-06	5.79e-06
Bradi1g02920	0.8	0.815772	0.17773	0.180923	0.131164	3.96966	27.094	7.75e-08	2.02e-07
Bradi1g02930	-0.297193	-0.18796	-0.141525	-0.271707	-0.77021	4.90351	16.6417	3.1e-06	5.82e-06
Bradi1g02940	0.0693294	-0.0324417	1.68984	0.560457	-0.138346	8.6972	114.12	4.28e-13	5.56e-12
Bradi1g02950	-0.39467	-0.42739	-0.376024	0.189777	-0.0297753	4.9161	10.079	9.44e-05	0.000136768
Bradi1g02960	-0.0185959	0.118262	0.0991479	-0.111447	-0.41865	6.74145	17.4094	2.24e-06	4.31e-06
Bradi1g02980	-0.10738	-0.29773	-0.707478	-0.429847	-0.318601	3.70696	6.46397	0.00128	0.0015843
Bradi1g02990	0.0965176	0.0674466	0.0229332	0.26686	0.460983	4.29855	5.99177	0.00190981	0.0023128
Bradi1g03020	-0.090533	1.14293	0.289699	0.102696	-0.901902	5.70209	77.0173	1.32e-11	9.69e-11
Bradi1g03030	0.166805	0.0473528	-0.0316324	0.406458	0.662168	4.70661	15.0091	6.5e-06	1.15e-05
Bradi1g03050	0.381531	0.0902951	0.506523	0.617065	-0.794505	5.28263	35.2916	9.34e-09	3.02e-08
Bradi1g03090	0.882839	0.778215	2.86313	3.52831	0.642409	3.02193	126.675	1.71e-13	2.63e-12
Bradi1g03110	-0.00474943	0.173112	-0.0719834	-0.0327919	-0.240846	4.52799	4.60242	0.00688467	0.00783302
Bradi1g03120	-0.00723762	-0.037091	0.100323	0.577619	-0.801593	4.92276	32.9374	1.63e-08	4.97e-08
Bradi1g03130	-0.11957	-0.145672	-0.0525796	0.459019	0.254637	5.66463	17.7329	1.95e-06	3.81e-06
Bradi1g03150	-0.0797855	-0.176192	0.027131	0.583385	0.642578	3.46748	20.6189	6.37e-07	1.36e-06
Bradi1g03160	-0.292526	-0.461892	-0.0616063	-0.293736	0.0544261	6.5699	14.4459	8.51e-06	1.47e-05
Bradi1g03170	-0.0176823	0.145847	0.582034	1.19908	0.00834951	5.71686	83.4207	6.59e-12	5.44e-11
Bradi1g03180	-0.183238	-0.575285	-0.967917	-0.524215	0.959421	8.06182	111.579	5.21e-13	6.55e-12
Bradi1g03185	-1.0088	0.631065	1.48011	1.12888	-0.632354	3.06378	51.9283	3.81e-10	1.77e-09
Bradi1g03191	0.131609	0.625602	0.645567	0.743064	1.34459	2.30902	10.063	9.54e-05	0.000138009
Bradi1g03220	-0.0472923	-0.212991	-1.2156	-2.84231	-0.0272519	6.47775	118.919	3.85e-13	5.14e-12
Bradi1g03250	-0.17081	0.287586	1.15633	1.90939	1.59324	8.18814	251.203	3.86e-16	3.03e-14
Bradi1g03283	-0.0640276	0.102078	0.0982604	0.477865	0.917585	2.55029	21.0706	5.41e-07	1.17e-06
Bradi1g03290	-0.235048	-0.2478	0.0623751	0.255925	0.391726	3.36567	9.78219	0.000114062	0.000163215
Bradi1g03340	-0.457319	-0.832422	-1.7327	-1.60005	-0.106936	5.49414	31.8194	8.06e-08	2.09e-07
Bradi1g03367	0.712543	0.778348	0.667936	0.229842	-0.243943	5.13697	31.7387	2.2e-08	6.5e-08
Bradi1g03380	0.298288	0.256118	0.51989	0.68591	0.573672	5.65266	16.6034	3.16e-06	5.91e-06
Bradi1g03400	0.316331	0.0439093	-0.369344	0.235903	1.29256	3.43518	26.4833	9.27e-08	2.37e-07
Bradi1g03410	-0.447667	-0.259178	-0.198701	-0.227098	-0.809275	5.24759	6.61871	0.00128457	0.00158946
Bradi1g03440	-0.00510072	-0.07675	0.312059	0.519227	0.147458	6.63651	17.2367	2.41e-06	4.61e-06
Bradi1g03450	0.435553	0.366527	0.65194	1.01292	1.69395	4.62468	43.1403	1.79e-09	6.89e-09
Bradi1g03470	-0.0304813	0.117449	0.482969	0.821131	0.519168	4.51789	22.3624	3.44e-07	7.76e-07
Bradi1g03480	0.0382071	-0.547782	-0.406033	-0.986856	-0.131913	3.39553	21.8514	4.1e-07	9.11e-07
Bradi1g03490	-0.0100661	0.41247	0.117243	-0.21345	-0.672276	5.50926	48.4494	6.82e-10	2.96e-09
Bradi1g03500	0.000592527	-0.269352	0.930474	0.63608	-0.69987	2.44636	9.95255	0.000117867	0.000168286
Bradi1g03510	-2.03086	-1.52814	0.0544297	0.254335	-1.67691	8.73646	38.8707	3.61e-08	1.01e-07
Bradi1g03530	0.203208	0.0570957	0.101182	-0.250901	0.331874	6.58322	13.8601	1.14e-05	1.92e-05
Bradi1g03550	0.129438	-0.109655	-0.328723	-0.283376	0.276509	5.1066	15.014	6.48e-06	1.15e-05
Bradi1g03560	-0.156935	0.0141004	0.904454	1.24561	0.694794	4.26859	45.8021	1.09e-09	4.45e-09
Bradi1g03580	-0.0809408	-0.323446	-0.32134	0.069679	0.524097	3.443	17.8662	1.85e-06	3.62e-06
Bradi1g03590	0.347457	0.459537	-0.0102591	-0.9745	-0.603623	4.97958	47.9069	7.49e-10	3.21e-09
Bradi1g03610	0.114986	-0.416995	-1.31654	-1.85859	-1.0508	3.65294	97.661	1.67e-12	1.7e-11
Bradi1g03620	0.77897	0.443655	0.000630413	-0.0158978	-0.271203	4.88289	27.646	6.61e-08	1.75e-07
Bradi1g03660	-0.0634572	0.200029	0.230227	0.191658	-0.154141	4.54017	6.1696	0.00163944	0.00200241
Bradi1g03686	-1.73445	-1.59092	-1.58988	-4.70384	-0.224939	3.46948	11.8512	0.000170134	0.000237311
Bradi1g03690	0.64338	0.417228	-0.370622	-1.08354	-0.927345	6.24047	88.2093	4.06e-12	3.61e-11
Bradi1g03720	0.187159	0.0916785	0.529395	0.805507	0.821211	9.14939	29.3381	4.13e-08	1.14e-07
Bradi1g03730	-0.147186	-0.00887231	-0.0344975	0.274368	0.156196	4.99812	8.45969	0.000277949	0.000376223
Bradi1g03750	-0.101174	-0.271155	-0.366696	-0.752509	-0.477717	8.3353	29.2272	4.26e-08	1.17e-07
Bradi1g03760	-1.14564	-2.00875	-4.12231	-3.73547	-3.68109	4.80235	199.268	1.31e-14	3.67e-13
Bradi1g03770	-3.22588	-4.14069	-6.16927	-5.75542	-6.2	4.5438	214.198	1.3e-13	2.12e-12
Bradi1g03780	-2.95859	-5.39475	-6.36234	-6.68123	-8.06768	3.67716	237.213	1.11e-14	3.24e-13
Bradi1g03790	-2.57386	-2.5349	-3.45644	-3.30737	-3.47291	1.57477	49.4218	6.05e-10	2.66e-09
Bradi1g03800	0.0160401	-0.257334	-0.0978302	0.0385947	0.363814	5.52358	16.2181	3.74e-06	6.9e-06
Bradi1g03820	-0.114418	0.10359	-0.225553	-0.623029	-0.694274	5.81183	28.0366	5.92e-08	1.59e-07
Bradi1g03827	0.359275	-0.376314	-0.803798	-0.804196	-0.534076	3.67443	14.4952	8.95e-06	1.54e-05
Bradi1g03840	-0.21217	-0.961822	-1.74951	-3.27324	-1.80465	5.43467	232.255	7.8e-16	5.02e-14
Bradi1g03850	-0.371043	-0.891941	-0.689244	-0.865008	-0.230009	4.045	23.5716	2.29e-07	5.38e-07
Bradi1g03860	0.111516	0.283724	0.441639	0.321856	0.337627	5.40368	11.1554	4.91e-05	7.44e-05
Bradi1g03867	0.0492248	0.287576	0.621073	0.820455	0.669437	3.07654	10.5948	6.86e-05	0.000101641
Bradi1g03880	-0.290442	-0.512683	-0.480492	-0.781682	0.625615	2.37881	22.25	3.57e-07	8.04e-07
Bradi1g03890	-0.246813	-0.239222	-0.10943	-0.451329	-0.534517	4.77836	12.2074	2.7e-05	4.27e-05
Bradi1g03900	-0.299725	0.27529	0.89445	0.96735	0.0304998	4.03683	32.5	1.82e-08	5.48e-08
Bradi1g03910	-0.0470344	-0.63292	-1.70238	-2.60098	1.18851	5.28332	140.264	2.29e-13	3.37e-12
Bradi1g03920	-0.0133049	0.273195	0.383788	0.136889	0.16098	4.31392	6.98807	0.00083646	0.00106001
Bradi1g03925	1.03623	1.01428	1.18151	0.720641	0.514064	2.846	6.20558	0.00168919	0.00205879
Bradi1g03930	-0.209339	-0.239202	-0.114707	0.122743	0.127059	4.41201	7.12848	0.000748709	0.000953915
Bradi1g03940	-0.486495	-1.02422	-1.88361	-2.46226	-1.24475	3.02491	84.3989	5.96e-12	5.02e-11
Bradi1g03947	-0.157463	-0.641243	-1.19855	-1.35003	0.0843601	2.84174	24.5192	1.69e-07	4.1e-07
Bradi1g03965	-0.294847	-0.240264	-0.170901	-0.172723	-0.561782	4.47239	7.36986	0.000620666	0.000798424
Bradi1g03980	-0.613998	-0.14075	1.15561	1.48785	0.376933	6.16781	200.233	2.94e-15	1.26e-13
Bradi1g03990	0.270637	0.179295	0.544886	0.791388	0.471993	3.74986	19.9868	8.05e-07	1.69e-06
Bradi1g04000	0.0864917	-0.869082	-0.26252	-0.0943063	0.589323	4.40865	36.9644	6.4e-09	2.15e-08
Bradi1g04010	0.744664	0.461125	-1.06511	-0.936377	-1.58688	2.4988	55.7343	2.1e-10	1.05e-09
Bradi1g04030	-0.329582	-0.26145	0.0328172	0.313206	-0.124419	3.14773	7.35647	0.000627097	0.000806308
Bradi1g04060	-0.130219	-0.139813	0.123944	0.743003	0.626009	2.49079	11.3268	4.44e-05	6.77e-05
Bradi1g04070	-0.464543	-0.507828	-0.706972	-0.793417	-0.634564	7.43825	7.89107	0.000475759	0.00062115
Bradi1g04080	0.0680782	0.715752	0.46079	-0.543454	-0.393054	6.05467	31.7707	2.44e-08	7.13e-08
Bradi1g04110	0.0126857	0.119689	0.19762	0.19014	-0.143041	6.98782	8.03003	0.00037843	0.000501893
Bradi1g04120	-0.551911	-0.421663	-1.04615	-0.842615	-0.198806	5.0767	42.3133	2.11e-09	7.94e-09
Bradi1g04130	-0.0283227	-0.306012	-1.34668	-2.81477	0.0954021	7.04069	165.779	1.58e-14	4.25e-13
Bradi1g04140	-0.0893724	0.417574	0.634535	-0.524027	-0.159979	9.03162	47.8248	7.6e-10	3.24e-09
Bradi1g04150	-1.58215	-1.61009	-1.77102	-1.71855	-3.78972	8.01635	77.7393	7.97e-11	4.53e-10
Bradi1g04180	-0.0215553	-0.132999	-0.0822172	0.222214	0.380065	6.72262	17.5866	2.08e-06	4.03e-06
Bradi1g04200	-0.073975	-0.180094	-0.65785	0.123603	0.617207	1.9576	8.12571	0.000352988	0.000470397
Bradi1g04210	0.268159	0.351385	-0.890155	-1.16602	0.401973	5.12333	37.6704	8.83e-09	2.87e-08
Bradi1g04220	0.0080205	0.0821783	-0.274796	-0.841202	-0.960023	7.66259	86.5151	4.81e-12	4.17e-11
Bradi1g04226	-0.0825704	-0.126266	0.303328	0.312104	0.739015	3.74849	13.4149	1.42e-05	2.36e-05
Bradi1g04232	-0.558625	-0.543653	-0.560321	-0.380393	-0.350913	4.40496	7.80999	0.000445003	0.000584074
Bradi1g04240	-0.296602	-0.0985432	0.136354	0.164555	-0.208283	5.36773	6.42031	0.00132732	0.00163947
Bradi1g04250	-0.251148	-0.384241	-0.335009	-0.101221	-0.092026	4.4822	4.85007	0.00541013	0.00622977
Bradi1g04270	-0.262623	-0.345676	0.162043	0.543771	0.472659	4.47945	37.0762	6.25e-09	2.1e-08
Bradi1g04300	0.0505591	-0.08557	-0.845059	-1.50739	0.376618	6.31192	130.619	1.3e-13	2.13e-12
Bradi1g04310	0.114179	0.218125	0.48086	0.582664	0.213569	4.52168	14.002	1.06e-05	1.8e-05
Bradi1g04320	-0.171978	-0.410874	0.521522	0.120138	-0.320149	2.5106	11.9519	3.11e-05	4.86e-05
Bradi1g04337	-0.00869556	0.0393867	-0.141275	0.230457	0.445543	7.79006	9.86151	0.000108411	0.000155543
Bradi1g04440	0.8164	1.05632	0.221199	-0.424078	-0.505834	6.03721	139.755	7.17e-14	1.35e-12
Bradi1g04477	-0.176644	-0.378079	-0.351066	-0.0189232	0.218645	4.51779	10.5397	7.1e-05	0.000104833
Bradi1g04500	0.420756	0.962398	1.07422	0.427203	-0.511828	3.6307	27.8687	6.21e-08	1.66e-07
Bradi1g04520	0.308003	0.305725	0.137038	-0.0826468	0.339655	6.38341	10.8477	5.89e-05	8.81e-05
Bradi1g04527	0.875508	0.784809	0.44719	0.648564	-0.425527	2.17228	17.3903	2.25e-06	4.35e-06
Bradi1g04550	0.527365	0.637294	1.51993	1.91469	0.297964	3.00173	58.2721	1.44e-10	7.54e-10
Bradi1g04570	-0.261405	-0.12717	0.189738	0.29059	0.075596	4.9122	13.044	1.72e-05	2.81e-05
Bradi1g04580	-0.281642	0.186877	0.817656	0.214665	-0.870749	1.99064	11.8399	3.31e-05	5.15e-05
Bradi1g04590	0.0530691	0.0415602	-0.21175	-0.0873382	-0.284663	3.95286	4.57298	0.00708753	0.00805358
Bradi1g04597	0.690018	0.452212	0.743453	1.53894	1.44716	5.22324	61.9096	8.58e-11	4.83e-10
Bradi1g04620	-0.184297	-0.854639	-1.9184	-3.68023	-1.98631	6.7336	222.543	1.14e-15	6.52e-14
Bradi1g04690	-0.138387	-0.476554	-0.82062	-1.411	-0.539355	4.22953	33.595	1.39e-08	4.3e-08
Bradi1g04700	-0.290258	-0.554483	-0.741907	-1.32217	-1.19753	11.6174	41.0112	2.73e-09	9.99e-09
Bradi1g04710	-0.379597	-0.441861	-0.633313	-0.589033	-0.744746	5.02012	22.4744	3.31e-07	7.5e-07
Bradi1g04720	-0.186685	-0.885704	-1.89845	-3.22442	-2.58719	3.77135	111.054	5.77e-13	7.1e-12
Bradi1g04730	-0.252754	-0.394973	-0.145066	0.367108	-0.0245966	2.78686	5.23413	0.00376437	0.00440782
Bradi1g04740	-0.0197798	-0.0603358	-0.0778107	-0.559439	-0.894131	4.83801	34.9117	1.02e-08	3.26e-08
Bradi1g04750	-0.269396	-0.103244	-1.31223	-2.77955	-2.78382	5.23578	69.9231	3.77e-10	1.76e-09
Bradi1g04760	0.582507	0.190856	-0.413763	-0.994761	0.0758173	2.48448	16.7289	2.99e-06	5.63e-06
Bradi1g04780	0.987827	0.268434	-0.159837	-0.767265	-1.06157	4.85444	76.1333	1.45e-11	1.06e-10
Bradi1g04790	0.440098	0.532164	0.865401	0.487774	-0.337748	4.83179	46.4006	9.79e-10	4.05e-09
Bradi1g04810	-0.10415	-0.628368	-1.44137	-2.16533	-0.151197	6.28252	154.368	2.97e-14	6.66e-13
Bradi1g04820	-0.177061	-0.150646	0.215424	0.257202	-0.0987361	5.30958	12.3139	2.55e-05	4.04e-05
Bradi1g04830	0.161008	0.178516	0.165384	0.212553	0.557352	6.88797	10.963	5.5e-05	8.27e-05
Bradi1g04840	1.06393	0.356274	-0.0385111	0.0157017	-1.02856	4.68457	119.093	2.94e-13	4.14e-12
Bradi1g04850	-0.126817	0.0783288	-0.249587	-0.810837	-0.455938	6.32303	46.8832	8.98e-10	3.76e-09
Bradi1g04860	0.339449	0.498339	0.833462	0.849585	0.540572	6.64461	24.4767	1.71e-07	4.15e-07
Bradi1g04870	-0.0358604	-0.0838223	-0.0743477	0.021208	-0.761186	4.44791	11.0489	5.23e-05	7.88e-05
Bradi1g04907	1.43436	1.63431	1.17601	0.118796	-0.861895	5.41658	177.175	8.73e-15	2.69e-13
Bradi1g04917	0.381147	0.26284	-0.060406	0.118259	-0.0480861	4.61665	6.44566	0.00129961	0.00160648
Bradi1g04957	0.896496	0.124035	-0.092383	0.410024	-0.0258891	4.22164	33.9088	1.29e-08	4.03e-08
Bradi1g04980	0.761515	0.515155	0.761125	0.896684	1.12858	3.51557	17.2174	2.43e-06	4.65e-06
Bradi1g04990	1.80262	0.73779	-2.19193	-3.04705	-3.86058	4.95229	224.821	1.56e-14	4.24e-13
Bradi1g05030	-0.18376	-0.00173025	0.00925143	0.013984	-0.435159	7.78979	10.9802	5.45e-05	8.19e-05
Bradi1g05037	-0.328508	-0.57249	0.297353	-0.0519261	-0.987612	2.93397	11.2829	4.56e-05	6.94e-05
Bradi1g05050	-0.00975931	-0.0171906	0.325769	0.255296	0.384177	6.06312	13.3429	1.48e-05	2.44e-05
Bradi1g05070	-0.0979597	-0.255663	0.00350697	0.379672	-0.0474489	5.21021	15.6672	4.79e-06	8.66e-06
Bradi1g05080	-0.322283	-0.379067	-1.12873	-1.32108	-0.941765	5.06165	19.9746	1.45e-06	2.9e-06
Bradi1g05100	1.32709	-0.507991	-1.97258	-2.18109	-3.41214	5.07396	170.545	1.23e-13	2.03e-12
Bradi1g05110	-0.14589	-0.43696	-0.121202	0.168476	0.285465	4.67549	11.3292	4.44e-05	6.77e-05
Bradi1g05116	0.038314	-0.116432	-0.141773	-0.0111049	0.620007	3.21723	14.434	8.56e-06	1.48e-05
Bradi1g05122	0.0855105	0.186393	0.378934	0.168511	0.00537033	7.02305	8.08166	0.000364458	0.000484799
Bradi1g05130	-0.156938	-0.282299	0.0701509	0.731125	1.11388	4.14745	61.0606	9.65e-11	5.36e-10
Bradi1g05141	-1.02742	-1.07542	-0.805668	-0.368983	0.547851	2.59058	23.9404	2.04e-07	4.84e-07
Bradi1g05170	0.0335426	0.244183	0.163935	0.230022	-0.072009	5.27743	5.68302	0.00250396	0.00298871
Bradi1g05180	1.07018	1.73111	1.72026	1.08909	-0.106047	5.74638	57.9484	3.22e-10	1.53e-09
Bradi1g05206	0.296627	0.485696	-0.148095	-0.559619	-0.858701	4.06135	51.0467	4.4e-10	2.01e-09
Bradi1g05210	0.444375	0.490382	0.631529	0.460054	-0.891894	2.81614	27.6309	6.64e-08	1.76e-07
Bradi1g05217	0.196006	0.149461	0.528589	0.529048	0.40734	5.38532	12.9546	1.81e-05	2.94e-05
Bradi1g05240	-0.167892	-0.294012	-1.64245	-2.64336	0.297189	6.20821	106.035	1.86e-12	1.85e-11
Bradi1g05320	0.162291	-0.330846	-0.204493	-0.216366	-0.0672749	3.29258	4.7774	0.00580314	0.00665709
Bradi1g05330	0.104198	0.0996363	1.66638	2.25403	2.04927	6.5239	142.709	7.51e-14	1.39e-12
Bradi1g05390	0.333078	0.302403	0.502021	0.868437	0.11799	4.24326	11.1384	4.96e-05	7.51e-05
Bradi1g05420	-0.0357976	-0.11562	-0.053681	0.224428	-0.180387	5.64408	9.27998	0.00015839	0.000221798
Bradi1g05430	-0.314568	-0.547525	-0.37442	0.0296942	-0.0161742	5.33521	21.2939	4.99e-07	1.09e-06
Bradi1g05450	-0.650413	-2.78103	-6.01665	-10.0332	-8.05432	3.47315	35.3679	4.1e-07	9.1e-07
Bradi1g05467	-0.193581	-0.268208	0.182979	0.569322	0.0581918	5.03694	31.8005	2.17e-08	6.41e-08
Bradi1g05480	-1.04253	-1.37604	-0.677819	-0.200863	-1.4593	6.59426	22.3492	1.12e-06	2.3e-06
Bradi1g05490	-0.0176072	0.158424	-0.322977	-0.573754	-0.48012	5.21373	26.1509	1.02e-07	2.59e-07
Bradi1g05500	0.408573	0.446617	0.327443	0.549288	1.37835	6.41466	28.5352	6.17e-08	1.65e-07
Bradi1g05510	-0.0741685	-0.0454934	0.0290253	0.232698	0.305975	7.04627	4.35556	0.00880552	0.00990713
Bradi1g05520	-0.685026	-0.698055	-0.518997	-0.388269	-0.412619	3.26189	10.0086	9.87e-05	0.000142495
Bradi1g05550	0.159074	0.202487	-0.254661	-0.717886	0.135778	4.08236	24.9986	1.46e-07	3.57e-07
Bradi1g05560	0.31071	0.576983	0.994631	0.968467	0.68827	5.55375	45.1717	1.22e-09	4.92e-09
Bradi1g05580	0.00119115	-0.0115573	0.0805319	-0.412989	-0.706773	6.58926	35.6749	8.55e-09	2.79e-08
Bradi1g05590	1.15181	0.491534	0.477568	0.381563	0.516328	3.66994	23.1091	2.67e-07	6.18e-07
Bradi1g05600	2.13913	2.7584	0.289041	-0.550525	-0.682564	2.47429	141.235	6.53e-14	1.26e-12
Bradi1g05610	0.372061	-0.195846	0.00351372	0.322311	1.55067	3.24163	42.6203	1.98e-09	7.54e-09
Bradi1g05620	-0.887934	-1.21152	-1.45609	-1.81867	-0.844235	3.49725	66.8535	4.45e-11	2.74e-10
Bradi1g05650	-0.0155541	-0.135006	0.326037	1.04058	0.496675	6.80003	87.676	4.28e-12	3.79e-11
Bradi1g05660	0.108935	0.309638	0.201053	0.338622	0.274801	6.09676	6.51849	0.0012235	0.00151764
Bradi1g05680	0.288514	0.309816	0.349077	0.639872	1.18597	4.36084	28.0762	5.85e-08	1.57e-07
Bradi1g05707	1.04059	1.00693	0.79818	0.594715	1.21377	2.77704	8.98856	0.000192675	0.000266673
Bradi1g05715	-0.681963	-0.509594	-0.966055	-1.34069	-1.68974	6.42432	8.26097	0.000889726	0.00112389
Bradi1g05740	-0.200553	-0.301609	-0.823895	-1.14615	-1.11604	7.06045	23.0621	3.96e-07	8.82e-07
Bradi1g05742	-0.586805	-0.906556	-2.12027	-1.91323	-2.04224	2.32963	28.3739	5.38e-08	1.46e-07
Bradi1g05743	-0.516247	-0.593734	-1.11604	-1.17532	-1.53062	4.7986	9.49174	0.000339388	0.00045355
Bradi1g05752	-0.165082	-0.0522382	-0.645439	-1.14771	-1.03565	7.26509	29.651	4.26e-08	1.17e-07
Bradi1g05757	-0.331219	-0.170878	-0.759413	-1.11307	-1.23424	5.00238	15.4025	1.07e-05	1.82e-05
Bradi1g05758	-0.31638	-0.295942	-0.864904	-1.21596	-1.5505	3.65919	15.0152	1.01e-05	1.72e-05
Bradi1g05765	-0.148796	-0.388494	-0.596027	-0.851061	-1.01523	8.92761	6.36999	0.00214053	0.00257593
Bradi1g05767	-0.431077	-0.471119	-0.661146	-1.0441	-1.61323	8.18068	5.1761	0.00720083	0.00817771
Bradi1g05768	-1.41291	-0.721281	-1.32343	-1.97477	-2.44847	3.73622	15.9044	1.69e-05	2.76e-05
Bradi1g05769	-0.370736	-0.307433	-0.840286	-1.02955	-1.12189	11.341	16.338	3.87e-06	7.12e-06
Bradi1g05778	-0.462483	-0.404794	-0.784128	-1.03944	-1.49373	6.35104	6.79773	0.0021594	0.0025969
Bradi1g05783	-0.298261	-0.299537	-0.717969	-1.01923	-1.28044	3.18868	5.95605	0.00262505	0.00312675
Bradi1g05788	-1.20446	-0.850066	-1.26222	-1.56279	-2.34949	8.79101	5.72195	0.0054187	0.0062383
Bradi1g05801	-0.951696	-0.719104	-1.24983	-1.43463	-1.95384	9.8316	16.3639	1.15e-05	1.94e-05
Bradi1g05804	-0.747849	-0.773825	-1.30768	-1.78567	-1.94604	6.40891	12.166	0.000125115	0.000178019
Bradi1g05810	0.233581	0.747691	0.471546	0.43727	0.309428	4.03139	8.21718	0.000330422	0.00044223
Bradi1g05813	0.0133011	-0.185514	-1.69637	-1.02685	-1.83485	3.259	61.8753	8.62e-11	4.85e-10
Bradi1g05817	0.592748	-0.275718	-2.3773	-2.71586	-3.79333	3.78954	282.492	1.35e-16	1.42e-14
Bradi1g05870	-0.0954185	1.22797	1.37973	0.401606	0.859231	5.17836	68.3502	3.68e-11	2.33e-10
Bradi1g05880	-0.612883	-0.325176	1.56699	1.47495	0.814359	6.21036	77.1054	4.22e-11	2.62e-10
Bradi1g05890	1.94285	1.72472	1.14907	0.507416	-0.980431	5.50862	71.2583	1.53e-10	7.98e-10
Bradi1g05950	0.157147	0.065925	-0.0210378	0.144652	0.426176	6.90279	9.78716	0.000113698	0.000162724
Bradi1g05970	-0.112659	-0.196989	0.0484543	0.0808774	0.140613	5.98881	5.99629	0.00190236	0.0023043
Bradi1g05980	-0.606892	-0.438963	-0.177171	-0.0618212	-0.0285304	4.57046	7.88346	0.000421435	0.000555313
Bradi1g06030	-0.0497832	-0.526427	-2.1603	-3.6478	-0.396907	4.61215	101.753	3.12e-12	2.9e-11
Bradi1g06036	-0.429377	-0.451733	-0.500425	-0.499858	-0.531211	5.84791	8.80176	0.00021894	0.00030052
Bradi1g06050	0.492992	-0.715599	-3.07771	-3.4717	-2.64635	3.13605	150.716	3.67e-14	7.85e-13
Bradi1g06060	0.00420898	-0.181945	-0.242137	-0.552258	-0.097618	2.69352	5.56454	0.00278389	0.00330983
Bradi1g06070	-0.0863097	-0.00630443	0.183477	-0.131222	-0.115729	5.40111	6.6503	0.00109794	0.00137097
Bradi1g06080	0.170469	0.150346	0.0382967	0.813661	1.55716	6.37289	78.4772	1.12e-11	8.49e-11
Bradi1g06090	-0.138648	-0.120552	0.101176	0.438651	-0.507049	7.1817	17.782	1.92e-06	3.74e-06
Bradi1g06100	0.336964	0.0207338	0.429662	0.882175	0.623569	2.57087	13.0398	1.73e-05	2.82e-05
Bradi1g06110	-0.296371	-0.122894	-0.040836	-0.310587	-0.324243	5.55181	5.4932	0.00296899	0.00351872
Bradi1g06122	-0.377583	-0.353817	-0.681723	-0.418061	-0.751789	2.93032	10.4791	7.37e-05	0.000108525
Bradi1g06160	0.0375802	-0.374029	-0.925195	-1.04857	-0.727055	4.69001	20.6998	7.03e-07	1.49e-06
Bradi1g06190	-1.62057	-2.80399	-3.08836	-3.07864	-3.82305	3.9576	152.076	5.1e-14	1.03e-12
Bradi1g06200	0.45245	0.152933	0.75223	1.83736	1.37899	4.3853	41.9568	3.07e-09	1.11e-08
Bradi1g06235	0.236161	0.139299	0.625874	1.60744	0.808271	2.71913	30.3119	3.18e-08	9e-08
Bradi1g06260	1.13939	0.593346	-0.216703	-0.964408	-1.27158	4.66494	81.7701	9.41e-12	7.3e-11
Bradi1g06290	-0.224408	-0.439068	-1.42244	-2.55107	-1.76288	6.51977	78.7544	3.81e-11	2.4e-10
Bradi1g06300	0.969496	-0.336423	-1.69324	-1.84874	-1.43264	6.72754	164.823	2.2e-14	5.38e-13
Bradi1g06310	0.1517	-0.0336209	0.00215326	0.417216	0.419358	5.97643	12.4737	2.34e-05	3.73e-05
Bradi1g06320	-0.0273481	-0.031319	0.184872	0.345772	0.191315	4.43712	5.6448	0.00259072	0.00308791
Bradi1g06340	0.0536166	0.100529	-1.00072	-2.13016	-1.07411	8.21523	103.976	9.67e-13	1.09e-11
Bradi1g06360	0.570653	0.786397	0.656708	0.94907	0.108653	5.50261	42.6274	1.98e-09	7.53e-09
Bradi1g06372	-0.332331	-0.766608	-2.40561	-2.30164	-3.91815	5.57131	68.9512	1.03e-09	4.22e-09
Bradi1g06380	0.0412252	0.267246	0.462016	0.21613	0.187019	5.38038	8.60111	0.000251651	0.000342441
Bradi1g06387	-0.0280674	-0.106108	-0.188264	-0.138097	0.201715	6.68572	8.32863	0.000305058	0.000410433
Bradi1g06420	-0.464648	-0.985373	-0.819283	-0.909748	1.52301	4.57179	127.475	1.61e-13	2.54e-12
Bradi1g06430	0.157444	-0.78117	-1.60708	-1.79005	1.06501	9.97006	274.324	1.76e-16	1.69e-14
Bradi1g06440	0.527093	0.131489	-0.319254	-0.458165	-0.848617	4.67717	66.4897	4.66e-11	2.85e-10
Bradi1g06451	-1.04966	-1.35495	-2.21186	-3.45217	-1.81725	5.63253	223.179	1.11e-15	6.47e-14
Bradi1g06480	-0.221562	-0.416976	-0.134593	0.03716	-0.0119368	5.93301	8.64478	0.000244095	0.000332891
Bradi1g06490	-0.692494	-0.890691	-0.679033	-0.818414	0.177691	5.59244	37.7992	5.33e-09	1.82e-08
Bradi1g06511	0.0411317	0.0430773	-0.216134	0.418382	0.094684	5.07021	10.4241	7.62e-05	0.000111957
Bradi1g06540	0.209123	0.00143356	0.391445	0.872542	0.725633	6.14412	38.1688	4.93e-09	1.7e-08
Bradi1g06550	-0.977396	-0.450155	-0.780846	-1.19898	-1.06463	2.48222	16.6548	3.09e-06	5.79e-06
Bradi1g06560	-0.224486	0.350313	-0.968786	-1.83992	-1.15543	5.54487	82.3724	8.81e-12	6.92e-11
Bradi1g06570	-0.255289	-0.160287	0.454717	0.628811	0.708584	2.60058	15.1321	6.13e-06	1.09e-05
Bradi1g06580	-0.135548	0.00723648	0.233302	0.257999	-0.230821	6.24823	15.1955	5.96e-06	1.06e-05
Bradi1g06590	-0.341834	-0.455652	-0.132788	0.202527	-0.26032	4.33739	8.90724	0.000203654	0.000280928
Bradi1g06620	-0.120183	-0.626715	-0.668814	-0.732817	-0.175782	5.18019	19.7541	8.79e-07	1.83e-06
Bradi1g06630	-0.0577274	-0.0412287	0.129878	-0.583218	-0.769783	5.73846	48.4083	6.87e-10	2.97e-09
Bradi1g06640	0.105862	0.104017	-0.316207	-0.694392	-0.237885	4.60949	25.3483	1.31e-07	3.24e-07
Bradi1g06670	-0.499984	-0.700782	-0.728263	-1.12233	-0.972574	6.84882	37.6359	5.53e-09	1.88e-08
Bradi1g06678	-0.372223	-0.773467	-1.52485	-3.21955	-2.61466	3.01786	114.796	4.06e-13	5.36e-12
Bradi1g06695	-1.08642	-2.50858	-5.20221	-10.861	-7.89205	7.37644	450.742	9.61e-17	1.2e-14
Bradi1g06700	-0.332526	-0.532674	0.0347763	-0.24762	-0.32639	5.27606	9.41809	0.000144548	0.000203848
Bradi1g06750	-0.410096	-0.647084	-1.40493	-1.3779	0.432565	5.34454	108.91	6.44e-13	7.71e-12
Bradi1g06772	0.12162	0.0712487	-1.14433	-1.94058	0.193836	5.41523	65.5859	8.09e-11	4.59e-10
Bradi1g06780	0.0974392	-0.18312	0.184866	-0.0586686	-0.559705	3.90291	13.2846	1.52e-05	2.51e-05
Bradi1g06800	0.00884363	0.146979	0.0727793	-0.352694	-0.313338	6.86962	15.1661	6.04e-06	1.07e-05
Bradi1g06810	0.0514779	0.0455477	0.29846	0.385317	0.546608	6.04206	13.7915	1.18e-05	1.98e-05
Bradi1g06821	-0.247401	-0.275684	-0.33337	-0.430925	-0.467535	8.08978	7.50879	0.000558079	0.000721776
Bradi1g06890	-0.25978	-0.664829	-1.34392	-1.48024	-0.156594	9.27563	26.7082	1.52e-07	3.72e-07
Bradi1g06900	1.48208	1.05704	-0.610257	-0.881763	-0.959566	4.39233	165.634	1.59e-14	4.28e-13
Bradi1g06904	1.24007	0.918875	-1.27566	-2.35351	-4.24837	4.85223	64.7964	3.49e-09	1.25e-08
Bradi1g06907	0.470078	0.263401	0.275859	0.264119	-0.644306	5.52708	41.4634	2.49e-09	9.21e-09
Bradi1g06917	-0.0331302	-0.168603	0.0611637	0.588421	0.446916	4.68252	26.9337	8.12e-08	2.1e-07
Bradi1g06930	-0.394966	-0.593206	-0.424756	-0.311675	0.326925	4.52548	17.8267	1.88e-06	3.68e-06
Bradi1g06945	0.063957	-0.137946	0.211409	0.484193	0.684167	3.33152	15.1534	6.07e-06	1.08e-05
Bradi1g06980	0.0568991	0.450728	-1.00712	-0.213866	-1.32717	4.00509	26.4057	1.34e-07	3.32e-07
Bradi1g07001	-1.2137	-1.26861	-0.518318	-0.356329	-0.740654	3.2063	10.3069	9.3e-05	0.000134816
Bradi1g07010	-0.298811	-0.811472	-0.845609	-1.19585	1.5097	3.5237	110.142	5.84e-13	7.16e-12
Bradi1g07027	0.362136	0.466475	0.895149	1.29755	0.641603	6.34788	38.9657	4.16e-09	1.46e-08
Bradi1g07035	0.749185	0.879174	-0.128413	-0.31707	-0.170271	2.46088	8.68499	0.000253266	0.00034458
Bradi1g07060	0.154833	0.0806087	-0.759855	-1.81712	-0.427058	3.08313	26.6479	8.83e-08	2.27e-07
Bradi1g07070	-0.0762808	-0.346537	0.0379724	-0.0275771	-0.351413	6.30329	11.0893	5.11e-05	7.71e-05
Bradi1g07110	-0.0166445	-0.18808	-0.147645	-0.0194083	0.463935	4.69263	14.6595	7.67e-06	1.34e-05
Bradi1g07120	-0.835909	-1.9744	-2.4816	-3.4818	0.643168	5.71786	315.382	5.02e-17	7.37e-15
Bradi1g07133	-0.230784	-0.445998	-2.13931	-2.8523	-1.26712	5.06139	117.603	4.41e-13	5.7e-12
Bradi1g07140	0.0676576	-0.416417	-1.24499	-1.28193	-0.315137	6.95718	49.4853	5.71e-10	2.53e-09
Bradi1g07150	-0.147818	-0.227279	-0.204677	-0.261423	-0.526827	7.45135	6.34654	0.00141175	0.00173775
Bradi1g07160	0.136898	0.644165	1.01103	0.691188	-0.0299753	8.24482	60.4011	1.06e-10	5.8e-10
Bradi1g07170	0.0371894	-0.382702	-1.47145	-2.20774	0.170204	9.86276	237.572	6.37e-16	4.31e-14
Bradi1g07180	-0.265728	-0.548891	-0.876401	0.0641643	1.24616	3.8414	79.5655	9.94e-12	7.63e-11
Bradi1g07190	0.505206	-0.2375	-0.878216	-1.69325	-0.600085	1.91249	21.0313	5.48e-07	1.19e-06
Bradi1g07200	0.864099	1.33638	0.888306	0.497314	-0.218582	6.9918	79.2971	1.02e-11	7.82e-11
Bradi1g07220	0.17692	-0.00202498	0.0737082	0.134212	-0.774161	3.41456	6.25742	0.00156882	0.00192111
Bradi1g07230	-0.425694	-0.372627	-0.283323	-0.586361	-0.886708	7.67715	18.6175	1.37e-06	2.74e-06
Bradi1g07237	0.459612	0.760417	0.701262	0.250661	-0.812435	7.36681	69.5159	3.18e-11	2.04e-10
Bradi1g07277	-0.428904	-1.01431	-2.41977	-1.81754	-1.24325	5.8399	54.4411	1.17e-09	4.72e-09
Bradi1g07320	-0.200339	-0.280689	0.0766427	0.0847832	-0.0276311	4.63005	7.22243	0.000695694	0.000889608
Bradi1g07330	-0.174004	0.327673	-0.11834	-0.514061	-1.62115	3.79568	42.4378	2.06e-09	7.77e-09
Bradi1g07340	-0.00462446	-0.386291	-0.179887	0.359541	1.94559	4.29354	118.697	3.03e-13	4.25e-12
Bradi1g07360	0.141426	-0.249332	-0.826081	-0.675422	0.29579	4.04545	35.76	8.39e-09	2.74e-08
Bradi1g07370	-0.316211	-0.476844	-1.84082	-3.06242	-0.477742	6.20097	156.77	2.59e-14	6.04e-13
Bradi1g07380	0.0945365	0.1321	0.158998	0.278049	0.877475	3.54701	18.1582	1.64e-06	3.24e-06
Bradi1g07400	0.563282	1.0684	1.25439	0.94057	0.169679	6.89442	57.3674	1.64e-10	8.49e-10
Bradi1g07410	0.446436	1.836	1.01607	-0.121362	-0.272178	2.56582	27.2999	8.06e-08	2.09e-07
Bradi1g07441	-0.0717662	0.154849	-0.53623	-1.09309	-0.959305	6.62456	35.6244	9.72e-09	3.13e-08
Bradi1g07450	0.245734	0.0190368	-0.124019	0.503732	1.13703	2.05786	12.8977	1.86e-05	3.02e-05
Bradi1g07470	0.333175	0.0551071	0.0766182	0.0267298	0.14024	6.7005	4.40999	0.00833622	0.00940146
Bradi1g07480	-0.473521	-0.785133	-0.187782	-0.467383	-0.94439	4.24065	9.95758	0.00010874	0.000155946
Bradi1g07490	0.0138184	-0.160547	-0.076855	0.307612	0.0626643	4.04477	6.73857	0.00102183	0.00128121
Bradi1g07495	-0.540523	-0.304322	-0.0239032	2.61865	0.857957	3.23951	167.447	1.44e-14	3.98e-13
Bradi1g07520	-0.162422	0.0223498	0.25641	-0.26576	-0.898759	6.37296	27.7237	6.47e-08	1.72e-07
Bradi1g07530	-0.567111	-1.19437	-2.43826	-3.66212	-0.123825	6.76446	110.771	4.57e-12	3.99e-11
Bradi1g07540	1.47518	1.99981	1.82586	2.03814	2.25509	3.07038	8.32954	0.000571735	0.000738252
Bradi1g07550	-0.349623	-0.290915	1.96193	3.47107	1.03781	7.73994	315.597	5.85e-17	8.25e-15
Bradi1g07560	-0.165537	-0.564928	-1.62332	-2.46653	-0.828571	6.18027	270.59	1.98e-16	1.84e-14
Bradi1g07570	1.02576	0.529614	-0.271735	-0.504475	-0.932773	6.5295	80.7441	8.75e-12	6.89e-11
Bradi1g07577	0.0588823	0.146229	-0.0737133	-0.0566507	-0.399902	4.2932	9.63151	0.000125718	0.000178829
Bradi1g07590	-0.176281	-0.261898	-0.573767	-1.37594	-1.4129	2.66932	23.0697	2.71e-07	6.25e-07
Bradi1g07620	-0.258764	-0.365081	-0.157602	-0.123461	-0.117855	5.65911	5.13014	0.00414744	0.00483562
Bradi1g07630	-0.690025	-0.669904	-0.545473	-0.0535208	0.279144	6.25731	77.7138	1.22e-11	9.09e-11
Bradi1g07640	-0.0382028	-0.561579	-0.585237	0.128406	-0.144455	3.9089	11.52	3.97e-05	6.1e-05
Bradi1g07650	1.34134	0.823939	0.091962	0.370507	-0.121957	6.02547	98.1407	1.6e-12	1.65e-11
Bradi1g07660	-1.51171	-1.37885	-2.46595	-2.63674	-3.98161	5.26994	57.241	4.71e-09	1.63e-08
Bradi1g07700	0.0935827	-0.185824	-1.20834	-0.989413	-0.202622	3.08138	8.11732	0.000474173	0.000619229
Bradi1g07710	-0.0688137	-0.222019	0.0622431	0.521628	0.296403	4.26834	13.1736	1.61e-05	2.64e-05
Bradi1g07717	-0.126531	-0.0567971	0.303367	0.513808	0.514672	4.8536	33.6402	1.38e-08	4.26e-08
Bradi1g07797	-0.693223	-0.637763	-0.0518003	0.529464	1.21626	1.87185	35.5828	8.74e-09	2.84e-08
Bradi1g07820	0.0432156	0.338662	0.476475	0.336442	0.483279	3.24561	4.55536	0.00721205	0.00818872
Bradi1g07830	-0.0125378	-0.214577	-0.39532	-0.656812	-0.540818	3.83373	13.9558	1.08e-05	1.83e-05
Bradi1g07840	0.387246	0.176392	-0.722183	0.00638423	0.718837	4.41131	31.2627	2.49e-08	7.24e-08
Bradi1g07870	-0.812211	-1.46825	-1.94187	-1.48534	-1.10737	5.5508	24.5344	7.9e-07	1.66e-06
Bradi1g07880	0.419519	0.0974375	-1.21613	-0.913014	-0.259411	3.36082	20.5438	7.11e-07	1.51e-06
Bradi1g07920	0.0667661	-0.00199753	0.305008	0.00452558	-0.234048	4.14691	7.08059	0.000777444	0.000988804
Bradi1g07930	-0.56775	-0.89852	-1.41632	-0.982588	-0.337468	5.82899	22.8564	5.25e-07	1.14e-06
Bradi1g07960	0.148043	-0.0992107	-2.34285	-1.88431	0.163104	5.08844	105.9	1.1e-12	1.22e-11
Bradi1g07980	0.116304	-0.147974	-1.13035	-1.752	0.681274	5.70167	117.136	3.4e-13	4.66e-12
Bradi1g08020	-0.253473	-0.225624	-0.0461975	0.0622098	-0.215615	5.76657	4.56137	0.0071693	0.00814305
Bradi1g08040	-0.414407	-0.520437	-0.0559047	0.214629	-0.0153664	4.8418	11.335	4.42e-05	6.75e-05
Bradi1g08060	0.0684303	-0.364426	-0.593075	-0.241846	-0.034933	4.5845	11.8769	3.25e-05	5.06e-05
Bradi1g08070	0.394155	0.286452	-1.11322	-1.70847	-0.807544	4.65519	44.5055	3.39e-09	1.22e-08
Bradi1g08080	0.0361988	0.232333	0.012031	-0.0275052	-0.20278	4.19358	5.96617	0.00195263	0.00236235
Bradi1g08106	0.0817926	-1.2603	-1.40197	-1.2576	-1.66973	3.32419	42.7805	1.92e-09	7.33e-09
Bradi1g08120	0.709839	0.781302	-1.27202	-2.46841	-2.72941	9.51545	308.141	6.18e-17	8.43e-15
Bradi1g08130	-0.0183191	-0.605602	-1.7428	-2.41344	-2.25223	2.90875	76.7409	1.36e-11	9.95e-11
Bradi1g08142	0.183888	0.209602	0.119705	-0.136135	-0.478119	3.31763	9.1249	0.000175707	0.000244492
Bradi1g08145	-0.093473	-0.597027	1.52078	2.32421	-0.622639	2.16908	26.2693	2.39e-07	5.58e-07
Bradi1g08157	-0.398313	-0.879479	-0.815347	-0.0546008	1.83643	0.97837	35.3071	9.31e-09	3.01e-08
Bradi1g08190	-0.360283	-0.828429	-0.470463	-1.44151	-1.93886	6.78388	75.3648	1.59e-11	1.14e-10
Bradi1g08201	-0.468187	-0.361146	-0.263527	-0.507343	-0.869035	6.79292	13.8325	1.15e-05	1.94e-05
Bradi1g08210	0.329637	-0.233284	0.149786	0.158438	1.16952	2.50428	22.7746	2.99e-07	6.83e-07
Bradi1g08240	1.08243	1.22244	0.736287	0.398557	0.343318	5.76188	27.2013	8.64e-08	2.22e-07
Bradi1g08270	1.21939	1.56843	0.358777	-0.89879	-1.28008	3.68221	106.964	7.55e-13	8.83e-12
Bradi1g08280	-0.0189163	-0.0068371	-0.137068	-0.332839	0.66666	4.82372	21.9316	3.99e-07	8.88e-07
Bradi1g08287	0.0181108	0.405507	0.270036	0.102497	0.139224	4.33987	6.33724	0.0014228	0.00175082
Bradi1g08294	0.252087	-0.135088	-0.237901	0.193124	0.37601	3.44889	6.51902	0.00122296	0.00151708
Bradi1g08301	0.0920686	0.42579	0.148228	0.109319	-0.697237	5.41923	38.521	4.57e-09	1.59e-08
Bradi1g08310	-0.162512	-0.546823	-2.13265	-3.22589	-2.0891	6.85167	413.883	4.34e-18	1.7e-15
Bradi1g08357	-0.429481	-1.10527	-0.9668	0.00873916	2.47306	7.11269	172.416	6.68e-14	1.28e-12
Bradi1g08370	-0.193175	-0.237675	-0.844366	-0.521345	0.31518	4.66086	36.8965	6.5e-09	2.18e-08
Bradi1g08380	0.696417	0.769225	0.294053	0.475413	-0.0779355	5.22448	34.9594	1.01e-08	3.23e-08
Bradi1g08400	-0.211198	-0.462546	-0.122345	0.310295	0.289796	6.40319	23.3589	2.46e-07	5.73e-07
Bradi1g08410	-0.47828	-0.338113	0.253656	-0.576548	-1.93366	5.48563	152.013	3.4e-14	7.4e-13
Bradi1g08421	0.0538958	-0.00200835	-0.525172	-1.57395	-1.30339	7.574	85.8571	5.14e-12	4.42e-11
Bradi1g08440	-0.304138	-0.322216	-0.222577	0.0751593	-0.0787633	5.54378	7.83425	0.000437063	0.000574308
Bradi1g08460	0.235409	0.404573	0.603093	0.703959	-0.136709	3.01235	14.3151	9.07e-06	1.56e-05
Bradi1g08480	-0.110903	-0.382407	-1.77804	-2.41011	-0.612536	6.45494	211.056	1.84e-15	8.95e-14
Bradi1g08510	-0.169559	-0.0701956	0.196445	0.313989	0.238521	3.42138	5.62331	0.00264095	0.00314522
Bradi1g08517	-0.312793	-0.293571	-0.333181	0.452287	-0.0851105	2.7557	4.90713	0.00512199	0.00591364
Bradi1g08540	-0.0695276	-0.436004	-0.268367	-0.181796	0.231992	3.30507	14.2109	9.54e-06	1.63e-05
Bradi1g08550	-0.242649	-0.462718	1.10892	2.42664	-0.301424	7.21219	39.9497	8.36e-08	2.16e-07
Bradi1g08570	-0.135428	-0.330953	-0.0448111	0.705948	-0.294434	8.25753	51.2702	4.24e-10	1.94e-09
Bradi1g08597	0.395861	0.154422	-0.512185	-1.05673	-1.73338	5.14441	82.8221	7.02e-12	5.74e-11
Bradi1g08607	0.22266	0.244048	0.441334	0.450473	0.765983	4.58419	14.9288	6.75e-06	1.19e-05
Bradi1g08620	0.280601	0.315668	0.238027	0.278173	-0.0251491	4.40658	5.57909	0.00274773	0.00326828
Bradi1g08627	-0.464655	-0.276514	0.174106	0.539171	-0.822279	2.19957	18.9601	1.19e-06	2.42e-06
Bradi1g08660	0.0285131	0.212958	0.284634	0.201427	0.249369	4.44815	5.00915	0.00464802	0.00539038
Bradi1g08680	-0.177672	-0.712654	-1.10296	-0.853257	1.53226	4.44107	50.5168	2.71e-09	9.93e-09
Bradi1g08710	0.249536	0.139485	-0.823635	-0.706359	0.014139	4.28648	19.3142	1.04e-06	2.14e-06
Bradi1g08718	-0.498573	-1.08837	-1.42453	-0.852452	0.78731	4.33992	97.163	1.75e-12	1.77e-11
Bradi1g08727	-0.334839	-0.27105	-0.0987737	0.101515	0.134694	5.07416	10.5555	7.03e-05	0.000103912
Bradi1g08760	0.175591	0.342393	1.292	0.5412	-0.183369	6.76001	173.235	1.07e-14	3.15e-13
Bradi1g08780	-0.37572	-0.183872	1.12583	0.464373	-0.0182025	4.22907	80.7592	8.73e-12	6.88e-11
Bradi1g08820	0.235426	-0.128796	0.0237601	0.0756529	0.986516	5.63577	25.8566	1.19e-07	2.98e-07
Bradi1g08830	-0.292895	-0.265947	0.234935	0.28045	0.254177	4.14515	11.7273	3.53e-05	5.47e-05
Bradi1g08840	0.29435	0.282796	0.472012	0.673663	1.24701	2.75231	17.7089	1.97e-06	3.85e-06
Bradi1g08847	-0.0606656	-0.206657	-0.168606	0.0111928	0.282795	3.66589	5.78857	0.00228056	0.00273484
Bradi1g08860	-0.0765391	0.022536	0.0638352	-0.13506	0.625296	7.31813	27.1549	7.62e-08	1.99e-07
Bradi1g08870	0.462375	0.523112	0.248446	-0.950663	-1.09212	2.55455	43.7076	1.61e-09	6.26e-09
Bradi1g08900	-0.157589	0.0216947	0.610293	0.341426	-0.172951	7.10843	38.7459	4.35e-09	1.52e-08
Bradi1g08907	-0.175335	-1.02105	-2.16609	-4.71952	-3.55582	6.28127	439.602	2.52e-18	1.13e-15
Bradi1g08930	-0.12301	-0.156023	0.222408	0.232091	0.146253	8.95496	10.1923	8.8e-05	0.000127968
Bradi1g08940	0.50018	-0.0138741	0.523721	0.864934	0.763485	2.12509	6.45364	0.00129102	0.00159635
Bradi1g08977	0.119187	0.306118	0.36912	0.562914	0.489576	5.08363	12.0209	3e-05	4.69e-05
Bradi1g08988	1.68952	1.5971	1.0105	1.44385	0.855478	3.41492	21.4315	4.76e-07	1.04e-06
Bradi1g09000	1.20909	1.62367	1.62767	1.77178	1.54294	3.53251	14.909	9.1e-06	1.56e-05
Bradi1g09030	0.306213	0.649718	-0.749187	-1.06539	-2.40414	7.77203	15.3495	4.13e-05	6.33e-05
Bradi1g09042	0.624147	0.872414	-0.158259	-0.156284	-0.982543	4.06454	53.4788	2.97e-10	1.42e-09
Bradi1g09050	0.884662	0.44509	0.514872	0.839024	1.52059	1.96628	13.197	1.59e-05	2.61e-05
Bradi1g09065	-0.283941	-0.0751089	0.0835276	0.0939376	-0.481758	6.8606	13.0664	1.7e-05	2.78e-05
Bradi1g09080	0.18479	0.642611	1.09008	1.14962	0.998382	1.99784	12.7848	1.98e-05	3.19e-05
Bradi1g09100	0.230781	0.293012	0.588728	0.61123	0.800231	3.77422	10.5863	6.9e-05	0.000102123
Bradi1g09120	0.363751	0.391337	0.0166079	-0.11394	-0.323875	5.19259	31.3716	2.42e-08	7.07e-08
Bradi1g09140	0.254152	-0.536913	-0.594483	-0.269356	0.327441	2.34641	17.6669	2.01e-06	3.91e-06
Bradi1g09150	-0.0716161	-0.247016	-1.05133	-1.03338	-0.923669	5.56373	63.3585	7.04e-11	4.06e-10
Bradi1g09170	-0.425481	-0.812904	-0.959172	-0.69374	-0.494525	4.92146	37.1199	6.19e-09	2.08e-08
Bradi1g09177	-1.37618	-2.43599	-4.82852	-5.10442	-5.07158	5.26403	143.351	6.45e-12	5.35e-11
Bradi1g09187	0.127266	-0.289056	-0.0775773	0.488694	-0.457541	3.40271	18.4651	1.45e-06	2.9e-06
Bradi1g09240	0.501871	0.706611	-2.93588	-4.00042	-1.20162	4.67391	63.6269	2.63e-09	9.67e-09
Bradi1g09246	1.00203	1.37628	0.195318	-0.238825	-0.0706394	3.60645	30.7683	3.14e-08	8.89e-08
Bradi1g09300	0.0972167	-0.366217	-1.45578	-1.70103	0.304909	10.6519	188.741	4.97e-15	1.82e-13
Bradi1g09310	0.933066	0.954662	1.18251	1.55303	1.80719	4.26178	12.1613	6.4e-05	9.52e-05
Bradi1g09320	0.00723151	-0.174361	-0.0957059	0.560157	0.464976	3.28535	11.0999	5.07e-05	7.67e-05
Bradi1g09327	-0.216106	0.0426393	0.0248231	-0.0670867	-0.300338	5.33785	6.92977	0.000876186	0.00110791
Bradi1g09340	0.0330221	0.143616	0.136342	-0.171028	-0.116215	5.66568	6.67425	0.00107668	0.00134579
Bradi1g09350	1.08284	2.18071	1.05663	0.900072	-0.386335	4.70429	141.059	6.6e-14	1.26e-12
Bradi1g09357	0.163957	0.0296815	0.169063	0.317497	1.0225	4.33549	13.9573	1.17e-05	1.98e-05
Bradi1g09369	0.0249086	0.176517	0.143122	0.0605646	-0.455488	5.28464	14.2495	9.36e-06	1.6e-05
Bradi1g09370	-0.116212	-0.234703	-0.116897	0.347956	0.078576	3.87277	7.02463	0.000812566	0.00103111
Bradi1g09390	0.170183	0.119192	0.474254	0.88294	0.795306	4.89037	39.0698	4.07e-09	1.43e-08
Bradi1g09400	-0.21848	-0.671257	0.344137	0.706665	0.692309	7.3993	52.0073	3.76e-10	1.75e-09
Bradi1g09410	-0.249002	-0.453143	-1.6935	-3.47063	-1.92495	8.1839	192.948	4.09e-15	1.59e-13
Bradi1g09420	-0.0857037	-0.357096	-0.743745	-0.761976	-0.89035	4.70951	22.7616	3e-07	6.86e-07
Bradi1g09431	-0.523076	-0.975613	-0.497764	-0.219463	1.33194	3.0638	42.6104	1.99e-09	7.55e-09
Bradi1g09450	0.11138	-0.240094	-0.625292	-0.343716	1.6556	4.5538	131.76	1.21e-13	2.01e-12
Bradi1g09460	0.0729141	-0.407139	-1.50029	-2.3188	-1.26782	7.78691	123.087	2.2e-13	3.26e-12
Bradi1g09487	-0.386486	0.338322	2.00509	2.49175	1.33412	9.5708	164.895	1.65e-14	4.39e-13
Bradi1g09507	-0.222156	-0.262057	-0.0913187	0.387379	0.479837	5.76951	33.3712	1.47e-08	4.52e-08
Bradi1g09530	0.211449	0.328108	0.426286	0.535382	0.376033	4.80291	8.20277	0.000333868	0.000446618
Bradi1g09537	0.184124	-0.0756648	-0.498669	-1.59102	-0.170578	7.25216	118.082	3.17e-13	4.4e-12
Bradi1g09560	0.032933	0.100547	-0.0519115	0.287889	-0.50662	4.0624	14.2666	9.28e-06	1.59e-05
Bradi1g09570	-2.78374	-3.56633	-5.79241	-5.61151	-5.28181	3.23955	160.677	1.48e-13	2.37e-12
Bradi1g09577	-0.340377	-0.360652	-0.254081	0.208696	0.122237	2.96689	5.09542	0.0042847	0.00498807
Bradi1g09583	-1.21942	-0.17378	3.18147	3.02092	0.00223486	1.66264	154.443	2.96e-14	6.65e-13
Bradi1g09609	-0.180281	-0.302367	0.34054	0.931981	0.153448	2.09723	15.4958	5.18e-06	9.3e-06
Bradi1g09615	-0.210888	-0.252306	-1.22458	-0.688094	-0.1724	5.47716	43.0263	1.83e-09	7.03e-09
Bradi1g09630	-0.343566	-0.226759	-0.00293641	0.213204	-0.642878	4.5515	18.2102	1.61e-06	3.18e-06
Bradi1g09680	0.621977	0.868644	1.50479	0.317789	-0.702872	5.25378	106.56	7.8e-13	9.09e-12
Bradi1g09710	-0.309013	-0.50992	-1.45288	-1.72161	-1.15693	8.98184	85.1385	5.53e-12	4.7e-11
Bradi1g09729	0.130853	-0.0745646	-0.329694	0.336067	0.110616	9.12505	18.322	1.54e-06	3.06e-06
Bradi1g09737	0.136548	0.347694	1.14414	2.14605	1.1802	7.45425	137.137	8.47e-14	1.53e-12
Bradi1g09750	0.380626	0.0351428	0.435659	0.663077	0.866254	5.49015	21.9119	4.02e-07	8.94e-07
Bradi1g09760	-0.417435	-1.00243	-2.25181	-2.74064	0.361171	5.46146	290.53	1.05e-16	1.23e-14
Bradi1g09774	0.769233	1.18956	1.28502	0.989879	0.721244	3.23821	16.2413	3.7e-06	6.84e-06
Bradi1g09777	1.54633	2.2182	2.21546	2.12461	2.29563	2.20525	12.7022	2.33e-05	3.72e-05
Bradi1g09780	0.178921	-0.654614	-0.99297	-1.14422	-0.819459	3.24239	18.5841	1.38e-06	2.77e-06
Bradi1g09790	-0.573867	-1.58183	-1.90889	-3.44041	-0.546896	5.00929	166.425	1.52e-14	4.15e-13
Bradi1g09800	0.413236	0.291929	-0.220997	-0.516028	-0.612775	4.99598	48.0055	7.36e-10	3.16e-09
Bradi1g09810	-0.109877	-0.178341	0.294384	0.394379	0.383414	5.05555	14.9953	6.54e-06	1.15e-05
Bradi1g09840	-0.486529	-1.25263	-0.414905	-1.69868	0.228195	2.50202	31.5088	2.33e-08	6.85e-08
Bradi1g09910	-0.117579	-0.380457	-1.35388	-3.49172	-2.87592	5.34609	152.322	1.08e-13	1.84e-12
Bradi1g09930	-0.0319657	-0.211727	-0.588788	-0.296405	0.312371	4.99019	20.5369	6.56e-07	1.4e-06
Bradi1g09940	0.200509	0.179972	-0.470024	-1.1092	0.0765005	6.57593	67.0173	4.36e-11	2.69e-10
Bradi1g09950	0.019107	0.0098204	0.104965	0.564165	2.04085	1.14117	19.579	9.39e-07	1.94e-06
Bradi1g09980	-0.539663	-0.740936	-0.257382	-0.432173	0.947057	1.64075	15.8893	4.33e-06	7.91e-06
Bradi1g09990	0.097462	-0.156549	0.518275	0.97391	0.676687	2.51841	10.6747	6.54e-05	9.71e-05
Bradi1g10000	0.187785	0.447871	0.391826	0.429102	0.344218	4.54541	7.33681	0.000636674	0.000818036
Bradi1g10007	0.037009	0.0227907	0.462646	0.68763	0.271487	4.10051	16.6135	3.14e-06	5.89e-06
Bradi1g10090	0.10852	0.469567	0.429442	0.469327	0.0285145	4.44801	13.0879	1.69e-05	2.75e-05
Bradi1g10110	0.173525	0.602429	1.41569	1.60435	0.208116	6.52835	88.2474	4.05e-12	3.6e-11
Bradi1g10120	0.176333	0.663229	1.18057	1.41439	0.550328	5.12098	83.9053	6.27e-12	5.23e-11
Bradi1g10140	-0.404762	-0.917223	-0.247833	0.658612	-0.226901	4.47844	42.4797	2.04e-09	7.71e-09
Bradi1g10150	0.181143	0.17651	0.0320107	-0.333629	-0.44278	8.88955	11.391	4.28e-05	6.55e-05
Bradi1g10190	0.00844527	0.06364	0.0590104	0.870647	0.929286	3.14519	16.1971	3.77e-06	6.95e-06
Bradi1g10210	0.137518	0.26509	0.145964	0.56523	0.129881	5.71695	13.9843	1.07e-05	1.81e-05
Bradi1g10220	-0.620428	-0.754217	-0.329468	-0.544122	-0.551583	3.70126	10.696	6.46e-05	9.6e-05
Bradi1g10240	0.117159	0.717816	1.8266	2.06352	1.11529	2.84296	59.6358	1.18e-10	6.37e-10
Bradi1g10250	-0.277433	-0.316488	-0.188488	0.1175	0.242159	3.51446	5.41011	0.00320184	0.00378271
Bradi1g10260	0.126142	0.944776	1.37764	1.21734	-0.0131339	4.68605	72.7506	2.15e-11	1.47e-10
Bradi1g10270	-0.0899083	0.0654415	1.41405	1.16181	0.747416	3.55663	25.4166	1.45e-07	3.55e-07
Bradi1g10290	0.822734	0.271745	0.263935	0.63224	-0.798589	2.15488	24.1199	1.92e-07	4.59e-07
Bradi1g10300	-0.251741	-0.378883	-0.0677104	0.302044	0.00444341	3.41221	5.02958	0.00455902	0.00529212
Bradi1g10330	0.0141794	-0.194504	-0.822956	-0.17226	0.522365	3.68879	14.0103	1.05e-05	1.79e-05
Bradi1g10340	0.151533	-0.0873567	-0.575053	-0.848996	-0.360333	5.7042	43.3575	1.72e-09	6.65e-09
Bradi1g10347	-0.272386	-0.803809	-1.5353	-0.82417	-0.289292	2.86601	33.4508	1.44e-08	4.44e-08
Bradi1g10360	0.150369	-0.189919	0.355081	0.09748	0.173917	3.92874	7.04129	0.00080193	0.00101858
Bradi1g10370	0.119186	0.0871121	0.235306	0.633072	0.291993	4.55576	17.2687	2.37e-06	4.56e-06
Bradi1g10410	0.801422	0.222634	-0.278973	-0.569775	-1.0978	2.55904	21.4732	4.68e-07	1.03e-06
Bradi1g10416	0.0339201	0.282357	0.193788	-0.1519	-0.478453	5.34446	23.4591	2.38e-07	5.57e-07
Bradi1g10447	0.0726879	0.189389	0.0451326	0.379722	0.499417	6.24867	8.47151	0.000275639	0.000373316
Bradi1g10470	0.313182	0.42244	0.427752	-0.0816378	-0.449131	2.21213	8.04001	0.000375684	0.000498415
Bradi1g10480	0.432567	0.888061	1.4211	1.05834	0.522201	8.38114	75.5919	1.55e-11	1.11e-10
Bradi1g10530	-0.163404	-0.582742	-0.521827	-0.424247	0.159358	4.85656	18.9873	1.18e-06	2.4e-06
Bradi1g10540	-0.332652	-0.480575	-0.674475	-0.489996	-0.692401	5.79401	12.8645	1.9e-05	3.07e-05
Bradi1g10550	0.0204634	-0.00519946	0.0100487	0.283554	0.452921	5.30326	10.5866	6.9e-05	0.000102115
Bradi1g10580	-0.019875	0.0413616	0.197018	0.472855	-0.166655	5.73959	11.0724	5.16e-05	7.78e-05
Bradi1g10590	-0.335513	-0.190582	-0.473107	-0.557205	-0.559884	3.90705	8.08364	0.000363933	0.000484181
Bradi1g10600	0.703144	0.51891	0.431704	0.758939	0.45301	3.3437	5.90334	0.0020623	0.00248606
Bradi1g10630	0.0513975	0.0589746	-0.182653	-1.40338	-0.928484	6.40917	130.702	1.29e-13	2.12e-12
Bradi1g10640	-0.0496817	-0.382722	-0.764877	-1.10816	-1.51971	8.25935	79.5384	9.96e-12	7.65e-11
Bradi1g10660	-0.169657	-0.761429	-1.30827	-1.10771	0.211444	5.77862	82.6323	7.16e-12	5.83e-11
Bradi1g10697	0.215713	0.331389	0.652634	0.832452	0.367759	5.54751	16.6522	3.09e-06	5.8e-06
Bradi1g10710	0.00157207	0.257355	0.132483	0.364755	0.0353844	3.87448	5.00964	0.00464586	0.00538903
Bradi1g10720	0.0123029	-0.0142218	0.079157	0.395165	0.0549186	6.4109	7.27922	0.000665668	0.000853111
Bradi1g10760	0.230452	0.838408	-0.0609008	-0.219368	-0.982011	3.81225	65.1694	5.53e-11	3.29e-10
Bradi1g10780	0.138597	0.189708	0.652013	0.652395	-0.35796	5.61336	41.1322	2.66e-09	9.78e-09
Bradi1g10810	-0.0459961	-0.0430468	-0.0510031	0.241791	0.383113	5.61175	14.2795	9.23e-06	1.58e-05
Bradi1g10840	-0.207573	-0.243049	-0.264005	0.335181	0.931566	2.43775	9.17878	0.000171676	0.000239297
Bradi1g10875	-0.397572	-0.0853348	-0.314651	-0.202954	0.364244	2.94866	8.51192	0.000267897	0.00036335
Bradi1g10880	-0.0687903	0.249072	-0.0344401	-0.356185	-0.220681	5.58036	16.1348	3.88e-06	7.14e-06
Bradi1g10900	1.19267	1.33396	1.07671	0.877869	1.39099	4.34222	7.16867	0.00123111	0.00152626
Bradi1g10930	0.280829	-0.24626	-1.578	-2.1234	-0.318849	2.15703	51.2303	4.27e-10	1.95e-09
Bradi1g10940	0.130126	-0.301558	-0.56883	-0.745504	0.380567	2.06574	16.6456	3.1e-06	5.81e-06
Bradi1g10950	0.39254	0.45686	0.841171	0.8538	0.163933	7.25866	32.0755	2.02e-08	6.02e-08
Bradi1g10960	-0.338881	-1.25511	-1.88513	-2.06572	-0.0411178	5.63443	202.184	2.69e-15	1.19e-13
Bradi1g10980	-0.22117	-0.156415	-0.647559	-0.771862	-1.05855	4.08629	25.8314	1.13e-07	2.83e-07
Bradi1g10990	-0.0320344	-0.283511	-0.87554	-2.36515	-0.594219	7.39573	101.296	1.22e-12	1.33e-11
Bradi1g11000	0.0877893	-0.434978	-1.34318	-2.15732	-0.538026	6.30642	182.111	6.84e-15	2.29e-13
Bradi1g11010	-0.245998	-0.320754	-0.528758	-0.124191	0.161139	4.95276	16.512	3.29e-06	6.14e-06
Bradi1g11020	0.124615	0.0279063	0.31947	0.237298	0.615319	4.36098	12.9077	1.85e-05	3e-05
Bradi1g11027	-0.0557086	0.00992715	-0.150478	-0.110693	-0.529539	5.04732	6.48896	0.00125375	0.001553
Bradi1g11040	-0.347649	0.204867	-0.0598929	-0.208296	0.0353739	4.05142	6.20705	0.00158806	0.00194378
Bradi1g11050	-0.414407	-0.242217	-3.70939	-2.56943	-0.0563196	1.66132	53.5871	2.92e-10	1.4e-09
Bradi1g11070	0.187115	0.123493	0.286796	0.493434	0.257432	5.56019	11.9606	3.1e-05	4.84e-05
Bradi1g11080	-0.353471	-1.07322	-1.06974	-1.72722	-1.18913	5.16185	34.7744	1.87e-08	5.61e-08
Bradi1g11090	-0.129775	-0.151609	-0.19441	0.371197	0.964445	6.3947	76.5099	1.39e-11	1.02e-10
Bradi1g11110	-0.0216204	-0.0701708	-0.154985	0.283582	0.516725	6.06496	34.0776	1.24e-08	3.88e-08
Bradi1g11130	0.0399896	0.00696128	0.558868	1.13026	0.596927	6.2213	100.37	1.32e-12	1.41e-11
Bradi1g11150	0.0104964	-0.229861	-0.21724	-0.534788	-0.743327	7.70325	31.9837	2.07e-08	6.14e-08
Bradi1g11160	-0.0660995	-0.647114	-1.13978	-0.801965	1.31041	6.40738	132.142	1.18e-13	1.97e-12
Bradi1g11180	0.459351	0.391701	0.465123	0.57682	0.596565	4.73679	7.01567	0.000818354	0.00103829
Bradi1g11187	0.330623	0.267928	-0.183433	-0.353065	0.297706	4.42429	15.5158	5.13e-06	9.22e-06
Bradi1g11200	0.0586569	0.509818	-0.0653308	0.0470168	-0.262422	4.14534	13.195	1.59e-05	2.62e-05
Bradi1g11210	-0.0478	-0.372529	-0.122559	0.186037	0.823528	3.92134	12.3093	2.83e-05	4.45e-05
Bradi1g11220	-0.418074	0.153167	0.290927	-0.52759	-0.334331	6.9684	16.1868	3.79e-06	6.99e-06
Bradi1g11240	-0.336391	-0.264059	-0.107907	-0.946869	-1.71849	6.81067	18.876	4.3e-06	7.86e-06
Bradi1g11250	-0.0892464	-0.624643	-2.58468	-2.57752	-3.31283	5.98677	79.9164	3.04e-10	1.45e-09
Bradi1g11270	-0.280213	-0.721041	-2.51383	-3.40615	-0.152613	6.22111	169.252	2.32e-14	5.59e-13
Bradi1g11280	0.808653	-0.187792	-1.50045	-1.02449	-2.02048	3.4621	74.1634	1.82e-11	1.27e-10
Bradi1g11290	-0.00545545	0.079586	0.148961	-0.12758	-0.0961306	8.56166	4.3873	0.00852846	0.00961019
Bradi1g11300	-0.0258186	0.281011	0.233299	0.010312	-0.291817	5.29114	15.5472	5.06e-06	9.11e-06
Bradi1g11310	-0.746044	-0.983266	-0.481295	0.121534	-0.600275	9.82993	38.7769	4.33e-09	1.51e-08
Bradi1g11317	0.395217	0.518429	0.175917	0.136963	0.0748462	5.77425	9.25204	0.000161365	0.000225784
Bradi1g11340	0.0802427	0.278481	0.314773	0.235383	-0.074674	4.93754	8.83834	0.0002135	0.000293378
Bradi1g11350	-0.135032	0.256631	0.527494	0.542472	0.483207	4.98453	22.6193	3.15e-07	7.16e-07
Bradi1g11365	-0.223507	0.0627293	0.638394	0.925316	-0.147278	5.96804	47.0586	8.7e-10	3.65e-09
Bradi1g11372	-0.308838	-0.604411	-0.967296	-0.958543	-0.0424351	2.40314	14.7407	7.38e-06	1.29e-05
Bradi1g11380	0.0231005	0.149015	0.314857	0.272533	0.180956	6.08087	5.45266	0.00308017	0.00364486
Bradi1g11397	0.209192	0.0566051	0.112586	0.869686	1.37932	2.01626	19.7086	8.94e-07	1.86e-06
Bradi1g11410	-0.301603	-0.533712	-0.644919	-0.560777	-0.21305	4.59607	16.9737	2.69e-06	5.11e-06
Bradi1g11430	0.561083	0.57397	-0.311039	-0.130747	-0.0641929	4.06426	22.0792	3.79e-07	8.48e-07
Bradi1g11440	-0.0184319	-0.0994352	-0.640017	-1.03788	-0.530746	8.37218	61.0498	9.66e-11	5.36e-10
Bradi1g11480	0.505771	0.369933	0.418857	1.1405	2.31646	2.27273	21.6645	5.35e-07	1.16e-06
Bradi1g11490	0.0953862	-0.207639	-0.979757	-1.09468	-0.443843	5.58519	39.6934	3.57e-09	1.27e-08
Bradi1g11500	0.225633	0.536465	0.154418	-0.817286	-0.77968	6.50355	80.6427	8.84e-12	6.94e-11
Bradi1g11510	-0.602203	-0.388094	-1.52505	-2.07122	1.33443	1.42841	38.6413	4.45e-09	1.55e-08
Bradi1g11530	0.0628465	-0.173404	0.335993	0.658573	-0.442139	5.85691	34.8792	1.03e-08	3.28e-08
Bradi1g11540	0.262784	0.416345	0.663178	0.298983	0.00194659	6.28566	30.1773	3.3e-08	9.3e-08
Bradi1g11550	-0.096942	-0.225116	0.278719	0.389241	0.0668072	5.39925	12.506	2.3e-05	3.67e-05
Bradi1g11580	-1.28006	-1.84346	-1.45912	-1.75465	-1.28995	4.35321	39.3336	5.4e-09	1.84e-08
Bradi1g11610	-0.170851	-0.470384	-1.64763	-1.5398	-0.212577	5.27565	100.877	1.26e-12	1.37e-11
Bradi1g11620	-0.361848	-2.28868	-3.19215	-3.44026	-4.33794	6.05287	153.478	1.25e-12	1.36e-11
Bradi1g11640	0.181979	-0.086926	0.638399	0.905979	0.355165	4.422	28.7621	4.83e-08	1.32e-07
Bradi1g11670	0.719775	0.33282	0.457341	0.736075	-0.188229	8.51309	39.4869	3.73e-09	1.32e-08
Bradi1g11680	0.0495723	1.05772	0.938755	0.815521	1.53211	8.71793	9.85773	0.00028917	0.000390624
Bradi1g11687	-0.701915	-0.820049	-0.466334	-0.504572	-0.356838	3.64469	8.99279	0.000192122	0.000265999
Bradi1g11700	-0.0985913	-0.177334	-0.130595	-0.331511	0.118692	5.16622	5.44017	0.00311536	0.00368541
Bradi1g11710	-1.01737	-1.05177	0.647583	0.845325	-1.46854	7.97457	89.221	5.74e-12	4.86e-11
Bradi1g11720	0.0584283	-0.173067	-0.246598	-0.434244	0.392524	5.77806	32.1783	1.97e-08	5.88e-08
Bradi1g11730	0.106727	0.0392022	0.22967	0.720001	0.827119	6.60873	36.2883	7.44e-09	2.46e-08
Bradi1g11750	-0.318613	-0.667949	-3.07595	-4.19147	-1.83963	2.31745	142.273	6.12e-14	1.2e-12
Bradi1g11760	0.655817	1.1971	0.524145	0.722814	1.74896	3.87	41.1254	2.67e-09	9.79e-09
Bradi1g11770	-0.27764	-0.617936	-0.838298	-0.252804	0.283462	4.61363	26.0053	1.07e-07	2.7e-07
Bradi1g11780	-0.000469284	0.482124	0.219623	0.00503397	-0.686443	4.0673	26.4862	9.26e-08	2.37e-07
Bradi1g11800	0.234139	-0.678246	-0.94517	-0.958695	-1.08924	6.19111	60.1719	1.09e-10	5.96e-10
Bradi1g11810	0.286083	0.246334	-0.506453	-0.670818	-0.625145	4.36695	38.6273	4.47e-09	1.55e-08
Bradi1g11830	-0.285214	-0.295246	-0.281208	-0.271988	-0.48949	6.66376	5.04836	0.00447883	0.00520316
Bradi1g11837	0.15459	-0.174957	-0.149919	-0.25498	0.491675	6.58658	37.7426	5.4e-09	1.84e-08
Bradi1g11890	-0.423427	-0.284158	-0.635796	-0.489627	-0.645856	3.94759	4.47618	0.00796229	0.00900056
Bradi1g11900	-0.193535	-0.334127	-0.224866	0.083795	0.827357	2.54081	21.3428	4.91e-07	1.07e-06
Bradi1g11920	-0.901592	0.0463933	2.15682	2.62835	1.79272	9.10179	213.456	1.66e-15	8.28e-14
Bradi1g11930	-0.202842	0.667227	2.96008	3.56673	2.00412	4.62905	46.8709	2.94e-08	8.4e-08
Bradi1g11960	0.0276357	-0.156326	0.0480507	0.481467	0.141322	5.08867	17.4543	2.2e-06	4.24e-06
Bradi1g11980	0.409098	0.89544	0.143297	-0.064631	-0.324599	5.46471	73.2438	2.03e-11	1.39e-10
Bradi1g11986	0.0618684	-0.430733	-0.932	-1.15928	0.0624284	6.28587	67.7802	3.95e-11	2.48e-10
Bradi1g11992	-0.0190446	0.0822514	0.254187	0.356012	0.352792	4.9898	10.2565	8.45e-05	0.000123406
Bradi1g12000	0.428149	-0.0167732	-0.60164	-0.777128	-0.41953	2.13924	14.5817	7.97e-06	1.38e-05
Bradi1g12040	-0.15101	0.301121	1.41452	1.22533	0.232594	6.38118	76.8013	1.35e-11	9.9e-11
Bradi1g12050	0.211382	0.601167	0.516989	-0.198813	-0.588891	6.99318	36.9263	6.46e-09	2.17e-08
Bradi1g12080	0.668987	0.639767	-0.332094	-0.288411	-2.305	3.74644	75.8787	1.5e-11	1.08e-10
Bradi1g12100	-0.328362	-0.260299	-0.306835	-0.911968	-0.787464	4.2539	19.637	9.19e-07	1.9e-06
Bradi1g12110	0.162021	-0.0313629	-0.0634167	0.511186	0.947148	3.57761	30.071	3.39e-08	9.54e-08
Bradi1g12117	-0.145804	-0.088233	0.431499	1.46801	2.47855	3.88292	110.048	5.88e-13	7.21e-12
Bradi1g12130	-0.721054	-1.16359	-4.58865	-6.21925	-5.57956	1.51346	20.9711	3.37e-06	6.28e-06
Bradi1g12140	0.084978	-0.114205	1.38653	1.38125	-0.191127	6.77703	95.0935	2.11e-12	2.07e-11
Bradi1g12150	0.234866	0.373631	0.742591	0.93968	1.04184	2.21284	8.27448	0.000317102	0.000425605
Bradi1g12170	-0.22456	-0.545476	-0.23435	-0.0080607	-0.108801	3.79791	5.72251	0.00241767	0.00289301
Bradi1g12180	0.176044	0.134953	0.871665	0.549634	-0.0435651	4.78954	44.0589	1.51e-09	5.91e-09
Bradi1g12190	0.61005	1.11638	1.43868	0.764195	0.0673705	7.32603	110.227	5.8e-13	7.12e-12
Bradi1g12200	0.0670041	-0.379133	-1.37881	-1.53955	0.0127351	4.87083	119.03	2.95e-13	4.15e-12
Bradi1g12210	-0.436986	-0.349483	-0.0411058	0.0437003	-0.511396	7.80846	11.9308	3.15e-05	4.92e-05
Bradi1g12216	0.292234	0.255931	0.549039	0.727795	0.605057	5.34299	17.0605	2.59e-06	4.94e-06
Bradi1g12230	-0.284636	-0.32499	-0.235424	-0.524854	-0.567257	8.44221	9.03259	0.000187005	0.000259183
Bradi1g12240	-0.877495	0.115439	-2.0999	-3.75914	-3.74222	4.4258	20.1414	1.12e-05	1.89e-05
Bradi1g12260	-0.117208	-0.552771	-1.558	-1.73523	0.169915	5.23865	118.482	3.07e-13	4.3e-12
Bradi1g12280	-0.264544	-1.53334	-3.51137	-2.86017	0.363984	5.15326	178.006	2.17e-14	5.36e-13
Bradi1g12300	0.025172	-0.47346	-1.26857	-1.38575	0.216551	5.93878	160.668	2.08e-14	5.2e-13
Bradi1g12320	-0.015705	0.466926	-0.050668	0.556642	0.610252	2.61376	10.7145	6.38e-05	9.5e-05
Bradi1g12330	-0.16843	-0.504968	-0.424659	-0.237194	0.00578469	4.85108	14.0363	1.04e-05	1.77e-05
Bradi1g12340	0.145959	0.406294	0.391927	0.417345	0.170496	4.92652	5.35185	0.00337709	0.00397836
Bradi1g12360	-0.432691	1.11852	7.84962	9.28828	5.20989	3.67267	189.787	1.44e-13	2.32e-12
Bradi1g12377	3.28758	2.4595	0.288415	-1.71462	-2.62537	2.81444	422.047	3.64e-18	1.46e-15
Bradi1g12397	1.33771	1.11429	1.40619	0.884775	0.217517	3.30634	46.2789	1e-09	4.13e-09
Bradi1g12440	0.472166	0.988772	2.61498	1.22452	-0.12382	1.88687	29.0092	4.84e-08	1.32e-07
Bradi1g12470	0.198533	0.302484	0.383262	0.293461	0.507844	5.19053	7.54221	0.000544087	0.000704756
Bradi1g12480	-0.32064	-0.296254	-0.418599	-0.428086	-0.800196	5.44949	16.8288	2.86e-06	5.41e-06
Bradi1g12490	0.242244	0.178186	0.281415	0.335659	0.400531	5.83773	5.98364	0.00192329	0.00232808
Bradi1g12510	0.0380702	-0.125542	-0.148015	0.161148	0.448892	5.39505	16.9026	2.77e-06	5.25e-06
Bradi1g12550	0.496617	0.137264	0.328281	1.94444	2.58961	7.97263	65.3462	5.12e-10	2.3e-09
Bradi1g12570	0.567613	-0.0161953	-1.30682	-1.93071	-1.85495	5.28573	180.283	7.48e-15	2.43e-13
Bradi1g12580	-0.199854	-0.139271	-1.65862	-2.53086	-3.99536	5.90845	231.305	1.28e-15	7.04e-14
Bradi1g12640	-0.425779	0.289817	3.34498	3.45237	1.26523	2.96652	180.94	7.24e-15	2.38e-13
Bradi1g12660	-0.0820197	-0.678714	0.205755	0.699264	0.317783	3.01261	23.6945	2.2e-07	5.19e-07
Bradi1g12673	-0.0224285	0.275969	0.038705	-0.347382	-0.243284	2.6717	4.50328	0.00759442	0.00860708
Bradi1g12697	1.07281	0.582317	0.28578	0.65601	1.84378	2.20564	16.6168	3.14e-06	5.88e-06
Bradi1g12705	-0.189909	-0.556501	-0.829959	-0.572818	-0.14078	3.54727	14.9307	6.74e-06	1.19e-05
Bradi1g12715	-1.30686	-1.25697	-0.746632	-0.00189066	-0.399712	3.97752	26.0563	1.15e-07	2.87e-07
Bradi1g12760	-0.671838	-0.0288063	0.121951	0.436194	0.456632	4.08106	38.1743	4.92e-09	1.69e-08
Bradi1g12787	-0.151609	0.264554	1.70578	3.37169	1.84669	10.3867	503.926	7.34e-19	4.93e-16
Bradi1g12800	-0.297368	0.0786956	-0.155354	-0.27342	-1.1282	4.10598	27.5324	6.83e-08	1.8e-07
Bradi1g12810	-0.646427	-0.926643	-1.47083	-0.959967	0.970778	3.99399	77.872	1.2e-11	8.96e-11
Bradi1g12820	0.0697182	0.606626	0.344387	-0.0421997	-0.199401	5.57947	30.903	2.73e-08	7.86e-08
Bradi1g12837	-0.400734	-0.550349	-0.547265	-0.339016	0.217539	3.17279	7.53071	0.000548857	0.000710477
Bradi1g12850	-0.128344	-0.780048	-1.60962	-0.655274	1.30795	4.69503	139.222	7.41e-14	1.38e-12
Bradi1g12870	0.788293	-0.132129	-1.2774	-1.67575	-0.614563	5.71342	58.7514	5.83e-10	2.58e-09
Bradi1g12880	-0.622659	-1.27611	-1.88847	-2.19649	-0.204518	6.28236	196.698	3.44e-15	1.42e-13
Bradi1g12890	-0.106203	-0.155932	-0.0248326	-0.261147	-0.481815	5.75341	10.055	9.59e-05	0.000138646
Bradi1g12910	0.110818	0.13602	0.253159	0.46737	0.112623	6.09816	12.0431	2.96e-05	4.64e-05
Bradi1g12920	0.28146	0.655084	0.504158	0.365291	0.329317	4.32724	8.96308	0.000196043	0.000271055
Bradi1g12940	0.135452	-0.00621532	-0.288315	-0.443745	-0.394695	5.20733	22.8863	2.88e-07	6.6e-07
Bradi1g12960	-0.160733	-0.358717	-1.32652	-0.921885	0.217939	2.12973	34.1369	1.22e-08	3.83e-08
Bradi1g12970	0.645868	0.343195	0.261566	0.325319	-1.65105	2.76119	34.176	1.21e-08	3.8e-08
Bradi1g12990	-0.368001	0.0357343	-0.13988	-0.395608	-0.818223	2.68652	4.4117	0.00832194	0.00938602
Bradi1g13070	0.0186592	-0.114495	0.693382	0.849045	0.175031	6.68356	9.83547	0.000204623	0.000282147
Bradi1g13080	1.47173	1.11418	0.402002	-0.312014	0.195314	3.92082	63.6925	6.73e-11	3.91e-10
Bradi1g13090	0.103513	-0.39727	-1.67542	-3.00918	-3.04801	4.18844	238.695	6.11e-16	4.2e-14
Bradi1g13097	0.234124	0.177023	0.385592	0.4319	0.590043	5.19887	8.88181	0.000207228	0.000285481
Bradi1g13121	-0.39226	-0.773017	-1.14041	-0.467066	1.73779	2.54436	72.1158	2.32e-11	1.57e-10
Bradi1g13150	0.046731	0.214651	0.408043	0.417122	0.156616	6.01683	12.2194	2.68e-05	4.24e-05
Bradi1g13170	-0.135092	-0.265966	-0.627467	-0.665706	-0.466503	5.13124	13.2584	1.54e-05	2.54e-05
Bradi1g13180	-0.160021	-0.172074	-0.401035	-0.394468	0.0892955	5.79681	11.4315	4.18e-05	6.4e-05
Bradi1g13190	-0.156248	-0.392283	-0.4076	-0.0397693	0.459628	4.52635	25.7877	1.14e-07	2.86e-07
Bradi1g13200	0.0791182	-0.502876	-1.06904	-1.36549	1.24601	3.00417	81.9279	7.71e-12	6.2e-11
Bradi1g13207	0.453513	-0.671665	-0.614587	-0.900834	-1.85016	4.69801	75.7487	1.52e-11	1.1e-10
Bradi1g13220	0.56906	0.623595	0.703306	0.520879	0.620389	4.6603	12.4524	2.36e-05	3.77e-05
Bradi1g13223	-0.12718	-0.264851	-0.0359439	-0.0038984	0.438346	4.72389	13.1146	1.66e-05	2.72e-05
Bradi1g13226	-0.301639	-0.215769	-1.34803	-1.79639	0.811188	6.06376	58.7097	7.28e-10	3.13e-09
Bradi1g13232	-0.196446	-0.371159	-0.853088	-0.717475	-0.35153	5.5544	39.4591	3.75e-09	1.33e-08
Bradi1g13240	-0.908805	-1.33128	-2.0188	-2.40782	-1.08296	3.05461	77.1825	1.29e-11	9.57e-11
Bradi1g13250	-0.18088	-0.492919	-0.569373	-0.315891	-0.321753	4.0121	6.86127	0.000925547	0.00116758
Bradi1g13290	0.0442499	0.418237	1.13121	0.281919	0.473087	10.0247	37.494	5.7e-09	1.93e-08
Bradi1g13310	0.239861	0.0140622	0.230576	0.414723	0.389175	4.45777	7.79462	0.000450114	0.000590156
Bradi1g13330	-0.337696	-0.635605	-0.861029	-0.966208	-0.711356	8.6673	31.9298	2.1e-08	6.22e-08
Bradi1g13340	-0.186582	0.0972883	-0.00362706	-0.289904	-0.413758	4.70955	9.15477	0.000172215	0.000239986
Bradi1g13350	-0.00763955	0.0977592	0.242547	0.189655	-0.674386	4.81498	26.7783	8.5e-08	2.19e-07
Bradi1g13367	0.105265	0.129273	0.341769	0.273672	0.669786	3.27642	4.57176	0.00709604	0.00806268
Bradi1g13420	-0.282404	-0.1663	-0.960031	-0.946003	0.50436	4.18067	26.2441	1.12e-07	2.81e-07
Bradi1g13430	0.0033168	-0.155547	0.260791	0.461294	-0.0759147	3.9887	8.54185	0.000262319	0.000356295
Bradi1g13440	0.0920749	-0.353159	0.512734	1.13409	1.18925	4.84743	51.2416	4.26e-10	1.95e-09
Bradi1g13450	0.215528	0.248516	0.540725	0.353005	0.438772	6.59199	11.5352	3.94e-05	6.06e-05
Bradi1g13470	0.316732	-0.169275	-0.218194	0.392214	0.35671	3.53887	14.664	7.66e-06	1.33e-05
Bradi1g13490	-0.0616162	-0.206793	-0.369923	-0.346536	0.393644	5.2687	10.7295	6.6e-05	9.81e-05
Bradi1g13500	0.498711	0.625335	0.713874	1.30081	0.620499	1.95403	7.32245	0.00064377	0.000826614
Bradi1g13520	0.667343	0.371276	0.430375	0.51663	0.68914	3.54103	4.76131	0.00589436	0.00675692
Bradi1g13580	0.340547	-0.13297	-0.194884	-0.875054	-0.562377	5.63241	42.4602	2.05e-09	7.74e-09
Bradi1g13590	0.131122	0.131837	-0.278664	-0.270134	-0.00881239	3.89582	9.06538	0.000182903	0.000253759
Bradi1g13630	0.0218834	-0.0409913	-0.545206	-0.566565	-0.179453	6.46169	13.0825	1.69e-05	2.76e-05
Bradi1g13640	0.28521	0.373529	0.491576	0.943795	0.39097	8.23065	32.9184	1.64e-08	4.99e-08
Bradi1g13650	0.0167074	-0.279598	-0.883119	-1.432	-1.00226	5.72576	103.104	1.04e-12	1.16e-11
Bradi1g13660	0.432863	0.996265	-0.0533237	-0.851956	-0.288541	4.05368	36.4091	7.25e-09	2.41e-08
Bradi1g13670	-0.24968	-0.113475	-0.0867388	-0.771931	-0.901047	4.30872	18.275	1.57e-06	3.11e-06
Bradi1g13690	0.0403938	0.00683157	0.192163	0.3891	0.0363877	4.68055	6.74791	0.00101413	0.00127254
Bradi1g13710	0.0187347	0.192663	-0.0412086	-0.0406453	-0.199812	5.80565	8.43171	0.000283505	0.000383228
Bradi1g13720	0.229723	0.287388	0.382942	0.670119	0.464375	6.11187	13.4239	1.42e-05	2.35e-05
Bradi1g13730	-0.275078	0.0682867	0.760068	1.4969	2.23373	2.82542	80.0532	9.42e-12	7.3e-11
Bradi1g13750	0.510934	0.375726	0.448232	0.52196	0.710334	3.47808	7.71507	0.000477637	0.000623298
Bradi1g13760	-2.42311	-3.89466	-4.56948	-4.14198	-4.60931	1.52633	101.049	1.24e-12	1.35e-11
Bradi1g13770	0.107595	0.410511	0.440408	0.555913	0.312109	4.4527	9.34374	0.000151825	0.000213382
Bradi1g13777	-0.232637	-0.297789	-0.406618	-0.684409	-0.402138	6.3142	18.2005	1.61e-06	3.19e-06
Bradi1g13787	0.194833	0.217433	0.528824	0.511716	0.899229	2.21144	6.77066	0.000995622	0.00125098
Bradi1g13827	-0.0648359	0.213772	1.09705	2.64486	0.787939	6.00038	288.31	1.12e-16	1.28e-14
Bradi1g13890	0.178541	0.241458	0.0464585	-0.113628	-0.0131688	4.52959	4.68475	0.0063505	0.00725655
Bradi1g13900	-0.206576	0.666864	1.67157	1.75833	0.748411	5.89452	158.971	2.29e-14	5.53e-13
Bradi1g13910	0.139698	-0.12487	-0.621898	-0.58376	-0.0218356	4.01715	21.0854	5.38e-07	1.17e-06
Bradi1g13930	-0.022175	0.110821	0.189385	0.0381856	0.398565	5.56131	9.65888	0.000123506	0.000175901
Bradi1g13960	0.0880009	0.0334283	-0.154596	0.416607	0.625353	3.46589	11.5577	3.89e-05	5.99e-05
Bradi1g13971	0.318517	0.322328	-0.663832	-0.96373	-1.54969	5.43074	121.168	2.52e-13	3.65e-12
Bradi1g13980	-0.274914	-0.564859	0.252518	-0.748326	-2.7509	6.23091	150.75	3.67e-14	7.85e-13
Bradi1g13990	0.264236	1.56984	0.605279	-0.860793	-0.812003	3.49226	85.7926	5.17e-12	4.45e-11
Bradi1g14000	-0.00458201	0.270374	0.32213	-0.0789485	-0.315779	5.84501	30.5233	3.01e-08	8.58e-08
Bradi1g14010	0.222411	0.480187	0.684963	0.530422	0.316699	5.40188	18.2128	1.61e-06	3.18e-06
Bradi1g14030	-0.169361	-0.532634	-0.0764014	0.182929	1.13766	3.20239	56.4997	1.87e-10	9.51e-10
Bradi1g14040	-0.0388059	0.453343	-0.401053	-0.681879	-0.319938	6.68372	47.924	7.47e-10	3.2e-09
Bradi1g14050	0.178261	0.861649	0.314789	-0.536966	-0.955697	3.96264	41.2712	2.59e-09	9.53e-09
Bradi1g14060	1.9385	1.47575	1.36032	0.0879673	-2.90062	1.8303	35.9093	9.37e-09	3.03e-08
Bradi1g14070	2.33786	1.40665	-1.70236	-2.68523	-3.3215	2.00792	105.592	8.45e-13	9.7e-12
Bradi1g14093	-0.325606	-0.245068	-0.606113	-0.896577	-0.602647	4.47308	17.09	2.56e-06	4.88e-06
Bradi1g14127	0.180242	0.457033	0.917051	1.19757	0.954984	5.57033	55.3369	2.23e-10	1.11e-09
Bradi1g14160	-0.666069	-1.54523	-2.21285	-3.24433	0.757394	2.09316	77.3383	1.27e-11	9.43e-11
Bradi1g14170	-0.782331	-0.679818	0.860533	1.38517	-0.00876249	10.0353	62.0298	1.18e-10	6.36e-10
Bradi1g14200	1.09513	0.259496	1.58227	0.0453826	-2.11288	5.05301	128.724	2.13e-13	3.17e-12
Bradi1g14210	-0.215688	-0.270342	-0.239665	-0.351952	-0.423556	6.89294	4.44158	0.00807646	0.00912449
Bradi1g14220	0.0187047	-0.021149	0.291986	1.10289	0.762794	4.6924	34.1508	1.22e-08	3.82e-08
Bradi1g14250	-0.307584	-0.161855	-0.0624961	0.097296	0.150996	5.39628	13.3434	1.48e-05	2.44e-05
Bradi1g14270	0.217934	0.522899	0.363437	0.684149	0.211957	3.9362	9.4866	0.000138183	0.000195507
Bradi1g14290	-0.184236	0.193799	0.499035	0.459211	0.139322	5.44442	16.5662	3.21e-06	6e-06
Bradi1g14300	0.6601	0.865711	0.19044	-0.277155	-0.343927	5.93787	64.0259	6.44e-11	3.76e-10
Bradi1g14320	-0.0300395	-0.0699481	0.0680344	0.221667	0.266236	5.27086	5.87088	0.00212159	0.00255467
Bradi1g14350	-0.233158	0.0537284	-0.783022	-1.75363	-1.32827	4.47711	95.7044	2e-12	1.98e-11
Bradi1g14360	0.44577	0.463389	-0.167313	-0.629699	-1.14342	5.89486	116.838	3.48e-13	4.74e-12
Bradi1g14370	0.358311	0.903917	0.717019	0.0046016	-1.91546	5.26458	108.676	6.57e-13	7.84e-12
Bradi1g14380	-0.545904	-0.447261	-0.489501	-0.383492	-0.47518	5.71047	4.83322	0.0057042	0.00654732
Bradi1g14410	0.197589	0.490645	0.593306	0.0321812	-0.24122	7.07773	33.309	1.49e-08	4.58e-08
Bradi1g14422	-0.356027	-0.36984	0.214889	0.575525	0.981948	5.92141	65.4968	5.3e-11	3.18e-10
Bradi1g14425	0.00646616	-0.234135	-0.307234	0.145874	0.822759	2.45628	12.2511	2.64e-05	4.17e-05
Bradi1g14430	-0.312439	-0.384249	0.0533161	0.156192	0.0661759	2.85682	6.01886	0.00186563	0.00226287
Bradi1g14450	0.136859	0.330829	-0.0845916	-0.178897	-0.00304305	5.51799	10.4188	7.64e-05	0.000112268
Bradi1g14460	0.270083	-0.151918	-0.727691	-1.40486	-0.820559	2.15493	35.6803	8.54e-09	2.79e-08
Bradi1g14480	-0.555595	-0.240265	-0.565151	-1.44403	0.137217	2.10592	21.0013	5.54e-07	1.2e-06
Bradi1g14486	-0.58747	-0.441486	-0.710142	-0.328492	-0.299889	3.99414	6.06792	0.00178844	0.00217368
Bradi1g14517	0.381734	0.343464	0.483881	0.736036	0.457431	3.02859	6.92766	0.000877664	0.00110961
Bradi1g14560	0.0366543	0.0577177	0.545302	1.50073	2.37593	3.05113	99.9297	1.37e-12	1.46e-11
Bradi1g14580	-0.444989	0.079662	-2.61891	-4.53695	-2.79134	6.2016	16.6863	3.86e-05	5.94e-05
Bradi1g14590	0.401953	0.984388	1.43608	0.696143	0.0239246	7.52437	110.839	5.52e-13	6.88e-12
Bradi1g14610	0.0601993	-0.218234	0.338044	0.436075	0.698402	2.76638	11.1394	4.96e-05	7.5e-05
Bradi1g14630	0.384929	0.16569	0.374	0.59007	0.779811	4.60963	10.0461	9.64e-05	0.000139346
Bradi1g14660	-0.0913066	0.0551059	0.275418	0.0476277	0.249016	3.91451	4.84234	0.00545048	0.00627309
Bradi1g14700	0.199129	0.177236	-0.0526575	-1.98685	-0.661466	6.42801	179.074	7.94e-15	2.52e-13
Bradi1g14710	-0.056508	-0.432186	-1.21245	-1.58231	-0.265859	6.26264	135.968	9.14e-14	1.62e-12
Bradi1g14720	0.557252	0.706946	-0.0195333	-0.077089	0.203392	3.57236	15.5652	5.02e-06	9.04e-06
Bradi1g14745	-0.511777	-0.810696	-0.899964	-0.3147	-0.138473	5.77356	21.7241	4.29e-07	9.5e-07
Bradi1g14750	-0.848827	-1.78247	-0.983936	-1.04692	-1.90836	5.32889	52.213	5.14e-10	2.31e-09
Bradi1g14760	-0.22381	-0.534143	-0.122916	0.157227	-0.450916	3.99375	8.21968	0.000329828	0.000441544
Bradi1g14770	-0.00726885	0.304461	0.388801	0.518103	0.276255	4.73987	7.80873	0.000445418	0.000584503
Bradi1g14780	-2.35833	-3.55465	-3.14362	-2.30221	-1.75689	4.44773	45.3424	2.3e-08	6.77e-08
Bradi1g14790	-0.402251	-0.283143	-0.0832713	0.425528	0.465453	3.82961	20.0411	7.89e-07	1.65e-06
Bradi1g14830	0.00541036	-0.0616951	-0.248482	-0.113954	-0.300652	6.73161	4.89906	0.0051617	0.00595649
Bradi1g14835	-0.051795	-0.436643	-0.440274	-0.767447	0.0893204	5.2179	28.4186	5.32e-08	1.44e-07
Bradi1g14850	-0.193225	-0.760684	-1.33065	-2.2658	-0.86625	2.75305	27.6597	6.59e-08	1.75e-07
Bradi1g14860	-0.318322	-0.188567	0.550591	0.0154424	0.397021	5.85681	35.8585	8.2e-09	2.69e-08
Bradi1g14900	-0.383525	-1.23722	-0.178004	1.15383	0.638708	4.04584	14.7248	2.93e-05	4.6e-05
Bradi1g14910	-0.26193	0.0116878	0.440939	0.891037	0.396282	3.71209	31.7353	2.2e-08	6.51e-08
Bradi1g14940	0.0628533	0.343206	0.587812	0.292599	-0.294636	5.7911	41.3895	2.53e-09	9.32e-09
Bradi1g14960	0.189912	0.107196	0.283766	0.533917	0.459596	3.54526	10.1195	9.21e-05	0.000133614
Bradi1g14965	-0.20208	-0.374522	-1.22284	-1.26041	1.1996	2.29463	43.0159	1.84e-09	7.04e-09
Bradi1g14980	0.366076	0.127843	-0.256629	0.0416157	-0.987961	3.93578	17.9205	1.81e-06	3.55e-06
Bradi1g14983	0.321731	-0.12522	-1.09875	-1.32971	-2.64633	8.06289	177.692	8.51e-15	2.66e-13
Bradi1g14986	-0.549594	-0.509815	-0.533689	-0.49192	-0.587317	5.6393	5.8773	0.002228	0.0026752
Bradi1g14990	-0.19624	0.00557106	0.462352	0.847298	0.306129	5.30678	23.1212	2.66e-07	6.16e-07
Bradi1g15000	-0.0968366	-0.335433	0.204385	0.489534	0.415371	3.0341	14.8061	7.16e-06	1.25e-05
Bradi1g15010	-0.194511	-0.42026	-0.674528	-0.33297	0.911071	4.73709	26.0061	1.89e-07	4.53e-07
Bradi1g15020	0.157464	0.0434974	0.14984	0.15638	1.1385	2.66149	19.827	8.55e-07	1.78e-06
Bradi1g15030	-1.29463	-1.09691	1.72408	0.906835	-0.388135	4.85758	55.0891	3.05e-09	1.1e-08
Bradi1g15040	0.045703	0.0233388	0.0798614	0.417843	0.329141	3.97783	4.5954	0.00693245	0.0078846
Bradi1g15050	0.338427	0.681464	-0.163768	-1.67884	-1.62892	9.05716	212.781	1.71e-15	8.43e-14
Bradi1g15060	0.0895707	0.210244	-0.0345579	-0.0428437	0.347592	5.55799	5.82475	0.00220912	0.00265391
Bradi1g15070	0.49058	0.421029	0.141411	0.0856579	-0.195776	6.47487	31.8203	2.16e-08	6.38e-08
Bradi1g15090	-0.527058	-0.299654	0.249652	0.194406	0.279458	2.20619	5.04219	0.00450502	0.00523246
Bradi1g15110	0.0146835	0.00890159	0.226782	0.388429	0.38359	5.51253	7.17007	0.000724711	0.000924584
Bradi1g15120	0.0944106	0.0886985	-0.31487	-0.648226	0.211414	5.0803	18.6563	1.34e-06	2.71e-06
Bradi1g15126	-0.253384	-0.513928	-1.04988	-1.30165	-0.997113	2.8938	20.5951	6.42e-07	1.37e-06
Bradi1g15140	-0.418749	-0.46993	-0.384796	-0.23578	-0.154159	7.0955	10.2307	8.59e-05	0.000125212
Bradi1g15170	-0.443854	-0.879002	-1.54476	-1.6207	0.453885	7.17272	84.1422	7.36e-12	5.96e-11
Bradi1g15180	-0.409646	-0.37338	-0.209791	0.169575	0.0489962	4.75089	11.9662	3.09e-05	4.83e-05
Bradi1g15190	0.318329	2.13529	4.07213	5.25266	3.69874	3.41125	290.829	1.04e-16	1.23e-14
Bradi1g15260	0.751653	0.52471	0.139697	-0.217188	0.393796	2.57715	8.94643	0.000198279	0.000273935
Bradi1g15270	0.904826	0.568736	0.676447	0.859862	1.43343	5.11563	10.2207	0.000175329	0.00024403
Bradi1g15290	-0.134357	-0.606406	-1.10769	-2.90039	-5.19187	11.6024	177.096	1.64e-14	4.37e-13
Bradi1g15297	0.134698	1.25121	-1.35492	-4.06633	-6.15873	2.25825	222.456	1.15e-15	6.52e-14
Bradi1g15300	-0.323781	-0.503862	0.278779	0.144965	0.252001	3.22104	12.3807	2.46e-05	3.91e-05
Bradi1g15317	-0.287548	-0.190907	0.212886	0.321156	0.452161	3.42675	10.9417	5.57e-05	8.36e-05
Bradi1g15350	-0.273268	-0.547058	-1.02597	-1.50289	-1.0713	5.91286	87.4806	4.37e-12	3.84e-11
Bradi1g15360	0.198032	0.230766	0.405747	0.711155	0.338773	5.11492	23.2617	2.54e-07	5.9e-07
Bradi1g15370	0.28314	0.214152	0.252542	0.516431	0.874671	5.68751	13.743	1.23e-05	2.06e-05
Bradi1g15377	-0.0467053	-0.247825	-0.294671	-0.0513941	0.892341	6.21704	72.0531	2.34e-11	1.58e-10
Bradi1g15400	0.310621	0.34877	2.13667	2.6594	1.28595	8.31816	290.893	1.04e-16	1.23e-14
Bradi1g15410	0.00373835	0.150041	0.618011	1.16819	0.335819	3.79309	49.083	6.11e-10	2.68e-09
Bradi1g15430	-0.00883288	-0.456855	0.757927	1.69917	1.45985	6.88786	355.97	1.69e-17	3.77e-15
Bradi1g15440	0.389022	0.78713	1.1103	0.751063	0.661654	4.47875	29.5919	3.86e-08	1.07e-07
Bradi1g15450	-0.399776	-1.11571	-0.614645	-0.989965	-0.803876	7.50652	26.6071	8.94e-08	2.29e-07
Bradi1g15490	0.467177	0.775627	1.20775	1.29411	0.239547	5.44478	65.4345	5.35e-11	3.2e-10
Bradi1g15507	-0.668782	-1.64931	-1.69361	-1.69102	0.116652	2.01013	34.8864	1.03e-08	3.27e-08
Bradi1g15520	-0.354959	-0.303997	-0.207834	-0.383962	-0.680707	6.81408	9.13267	0.000174791	0.000243344
Bradi1g15530	-0.375637	-0.0804256	0.118589	0.174957	-0.368877	5.04627	7.76745	0.000459314	0.000601484
Bradi1g15547	-0.37395	-0.639048	-0.832365	-1.74992	-1.71064	5.80237	105.09	8.81e-13	1.01e-11
Bradi1g15560	0.25886	-0.287124	-0.288963	-0.429796	0.981323	5.81919	39.5639	4.31e-09	1.51e-08
Bradi1g15590	0.231594	0.555602	0.15612	-0.506727	0.415824	4.40423	17.9819	1.76e-06	3.46e-06
Bradi1g15595	-0.0640805	-0.472053	-0.0710191	0.509931	0.121177	3.00016	8.49072	0.000271929	0.000368694
Bradi1g15610	0.965918	2.41116	2.85229	1.49353	0.0194395	5.6417	159.077	3.44e-14	7.46e-13
Bradi1g15615	-0.155203	-0.151833	-0.507382	-0.307654	1.33733	1.46859	30.1455	3.33e-08	9.37e-08
Bradi1g15627	-0.463253	-0.67332	-0.83701	-0.594518	0.00642366	4.0255	16.6713	3.07e-06	5.76e-06
Bradi1g15640	-0.0306545	-0.482403	-1.12546	-1.58747	-1.04165	2.435	28.8895	4.67e-08	1.28e-07
Bradi1g15670	0.100073	0.0163744	0.665193	0.379317	-0.247568	2.23373	9.53026	0.000134289	0.000190365
Bradi1g15680	0.263412	0.396667	0.0224988	-0.331315	-0.444385	8.00666	27.4532	6.99e-08	1.84e-07
Bradi1g15695	2.0203	5.1581	6.21057	3.02376	0.126907	2.43718	150	4.65e-14	9.52e-13
Bradi1g15711	-0.30754	-0.507627	-0.325797	-0.45973	0.567842	1.9624	17.2087	2.43e-06	4.66e-06
Bradi1g15730	-0.0669715	-0.0648996	-0.0428116	0.319638	0.380109	5.5368	18.8915	1.23e-06	2.48e-06
Bradi1g15750	-0.144248	0.00781753	0.143039	0.616808	-0.504982	3.6391	25.9639	1.08e-07	2.73e-07
Bradi1g15760	-0.337316	0.609775	1.40948	1.01652	0.0297741	5.48513	70.9704	2.66e-11	1.76e-10
Bradi1g15770	-0.082257	0.404091	0.170424	-0.019364	-0.243785	3.08705	5.79459	0.00226849	0.00272118
Bradi1g15780	0.924416	0.86628	0.661976	0.562908	0.713372	4.65785	13.1177	1.66e-05	2.71e-05
Bradi1g15800	0.254777	0.499096	0.946218	1.66621	1.09913	6.26903	98.2523	1.59e-12	1.63e-11
Bradi1g15810	0.14473	0.0519787	0.237776	0.321527	0.495399	3.91711	6.30243	0.00146505	0.00180088
Bradi1g15830	-0.0985968	-0.584008	-1.78162	-3.9878	-3.01443	8.22308	333.07	3.07e-17	5.49e-15
Bradi1g15840	0.167606	0.792685	0.422553	-0.50311	-1.25924	8.3484	104.246	9.46e-13	1.06e-11
Bradi1g15850	0.00820225	0.296596	0.740478	0.160479	-0.709513	8.58636	43.4941	1.68e-09	6.49e-09
Bradi1g15880	-0.200091	-0.397106	-0.336661	-1.61317	-1.36788	6.83436	103.657	9.94e-13	1.11e-11
Bradi1g15900	0.0816622	-0.243983	-0.113622	-0.0227825	1.11888	4.49161	93.01	2.56e-12	2.45e-11
Bradi1g15910	0.781752	0.877377	0.0123622	-0.201458	-0.112581	3.63595	41.4895	2.48e-09	9.16e-09
Bradi1g15920	0.173841	0.240952	0.313263	0.306917	0.405979	5.73159	6.59628	0.00114758	0.00142809
Bradi1g15930	-0.0726176	-0.773426	-4.29852	-8.33026	-7.48763	6.07199	273.881	2.83e-14	6.42e-13
Bradi1g15960	-0.00245539	-0.00319867	0.276387	0.376859	0.454703	3.5544	4.86217	0.00534754	0.00616035
Bradi1g15970	-0.0139735	0.1009	0.523715	0.245692	0.222254	6.15838	13.0338	1.73e-05	2.83e-05
Bradi1g15990	-0.131217	0.478661	0.435131	0.271162	-0.204993	4.09256	21.2509	5.07e-07	1.11e-06
Bradi1g16000	0.161623	0.230349	0.579058	0.44557	-1.2074	6.31003	41.7383	2.96e-09	1.08e-08
Bradi1g16010	-0.958689	-0.554188	-2.91977	-3.36754	-7.41269	4.25293	100.95	3.44e-11	2.19e-10
Bradi1g16030	-0.026267	0.470036	0.316648	-0.241492	-0.362815	3.53572	6.74475	0.00104136	0.00130448
Bradi1g16075	0.275156	-0.388162	-0.834286	-0.772357	0.209111	4.24204	38.4801	4.61e-09	1.6e-08
Bradi1g16120	0.14105	-0.317958	-0.116634	-0.0324364	0.155721	3.59584	5.42631	0.00315491	0.00372891
Bradi1g16140	0.0931755	0.103277	0.08835	0.195236	0.462315	5.33754	9.49434	0.000137484	0.000194586
Bradi1g16170	-0.0291968	-0.00705959	0.169278	0.150662	0.4454	5.28498	14.3675	8.84e-06	1.52e-05
Bradi1g16180	-0.44112	-0.244537	-0.360087	-0.383086	0.86414	2.86718	34.1267	1.23e-08	3.84e-08
Bradi1g16190	0.109493	-0.0140528	-0.616279	-0.534818	0.795644	6.28072	49.2845	5.91e-10	2.61e-09
Bradi1g16230	-0.590582	-0.859128	-2.4313	-3.93032	-2.69418	2.76949	104.684	9.12e-13	1.03e-11
Bradi1g16240	-0.0980855	-0.200736	0.0798161	0.566513	-0.316012	4.53362	19.1302	1.12e-06	2.28e-06
Bradi1g16297	-0.548762	-0.468982	-0.0473569	-0.141893	0.441089	3.68998	9.37111	0.000153328	0.000215288
Bradi1g16460	-0.0561054	-0.134011	-0.0341904	0.0595662	0.622761	5.44392	38.857	4.25e-09	1.49e-08
Bradi1g16470	-0.00109428	-0.159114	-0.736065	-0.921514	-0.716025	4.19958	11.0677	6.29e-05	9.36e-05
Bradi1g16480	0.263381	-0.566063	-1.47687	-1.54172	-2.11136	5.65616	134.973	9.75e-14	1.7e-12
Bradi1g16490	0.0566076	-0.413066	-0.538057	-0.37303	0.261059	5.60593	28.4393	5.29e-08	1.43e-07
Bradi1g16500	0.0985927	-0.06396	-0.149136	-0.104909	0.42183	4.73529	7.20891	0.000703061	0.000898458
Bradi1g16510	-0.174242	-0.410855	-0.184195	-0.134097	-0.248931	9.74929	6.03715	0.00183642	0.00222896
Bradi1g16517	0.774128	1.12558	0.93395	0.164868	-1.0012	5.61463	140.43	6.87e-14	1.3e-12
Bradi1g16527	0.636378	0.458902	0.629689	0.834969	1.11097	3.48966	7.87182	0.000441661	0.000579829
Bradi1g16560	0.267255	0.348427	0.00700667	-0.010025	0.523765	5.67779	10.1099	9.26e-05	0.000134358
Bradi1g16570	0.035947	-0.0597391	0.107379	0.578004	0.509135	5.4778	43.2324	1.76e-09	6.79e-09
Bradi1g16580	0.304517	-0.666842	-2.48755	-5.898	-1.25672	6.23875	513.687	6.17e-19	4.5e-16
Bradi1g16590	0.115763	0.544863	0.547799	0.400108	-0.0713961	6.14299	18.5245	1.42e-06	2.84e-06
Bradi1g16610	0.235397	0.582029	0.250541	0.399773	0.204967	4.22805	12.85	1.91e-05	3.09e-05
Bradi1g16620	0.448209	0.502854	0.687538	0.915333	0.32933	6.96479	37.9517	5.16e-09	1.77e-08
Bradi1g16630	0.173443	0.448694	-0.308702	-0.208624	-0.363476	6.18788	7.4434	0.000812149	0.00103066
Bradi1g16640	0.492905	0.433827	0.394366	0.627655	0.736216	3.66349	8.04728	0.000373698	0.000496147
Bradi1g16670	0.388009	0.064893	-0.827275	-1.44345	-0.120034	5.18882	67.6284	4.03e-11	2.52e-10
Bradi1g16680	0.549327	0.533326	0.76395	0.37981	0.532361	4.90985	6.07446	0.00185519	0.00225089
Bradi1g16700	0.0298037	-0.10238	0.0739856	0.482558	0.33189	5.5789	18.4086	1.48e-06	2.96e-06
Bradi1g16710	0.747941	0.0420912	0.262311	-0.31153	-1.34576	4.18056	51.1023	4.36e-10	1.99e-09
Bradi1g16740	0.0249582	-0.396259	-0.408119	-0.394502	-0.464463	3.12439	6.28703	0.00148417	0.001823
Bradi1g16770	0.470292	0.21983	0.256803	0.289254	0.900891	5.2535	27.4219	7.05e-08	1.85e-07
Bradi1g16810	-0.0307508	0.482059	-0.0234285	-0.201333	-0.643977	4.84245	27.4379	7.02e-08	1.85e-07
Bradi1g16820	0.364056	0.246797	-0.0577647	-0.075113	0.035649	4.91925	9.41664	0.000144686	0.000204025
Bradi1g17050	-0.4026	-0.536428	-1.28641	-1.47863	-0.695777	4.63846	41.9676	2.25e-09	8.44e-09
Bradi1g17070	-0.177516	0.0818041	-0.257684	0.447514	0.388325	4.42467	7.75518	0.000480151	0.000626325
Bradi1g17080	0.178452	-0.376834	-0.347908	0.279765	1.13513	3.05966	36.8098	6.63e-09	2.22e-08
Bradi1g17090	-0.0266516	-0.379367	-1.74254	-0.280056	1.4522	5.83795	67.6774	2.99e-10	1.43e-09
Bradi1g17116	-0.793262	-0.717267	-1.27201	-1.57906	-2.21817	1.89814	18.5329	1.41e-06	2.83e-06
Bradi1g17160	0.0698782	-0.396624	-0.452327	-0.830054	-0.265533	2.80203	14.0254	1.05e-05	1.78e-05
Bradi1g17200	-1.37917	-1.24202	-1.32969	-1.79114	-3.77972	1.95109	47.8848	7.52e-10	3.22e-09
Bradi1g17210	0.353579	0.409275	0.341672	-0.0423169	-0.0122428	6.35991	13.9671	1.08e-05	1.82e-05
Bradi1g17220	-0.0584456	-0.24029	-0.791017	-1.06368	-0.617997	5.58057	62.0627	8.4e-11	4.75e-10
Bradi1g17237	-0.10218	0.234017	0.219165	-0.338445	-0.607386	8.70834	19.9543	8.15e-07	1.71e-06
Bradi1g17243	-0.0450505	-0.5312	-2.06806	-3.58982	-2.29806	4.81696	172.903	1.45e-14	3.98e-13
Bradi1g17250	-0.212756	-0.739231	-1.93207	-2.577	1.1011	1.89728	79.8231	9.66e-12	7.46e-11
Bradi1g17257	0.866453	0.763015	0.672126	0.712891	0.146482	2.55271	8.74111	0.000228302	0.000312624
Bradi1g17270	0.99992	1.18739	0.0402153	0.00174901	-0.428686	3.60722	21.9931	5.38e-07	1.17e-06
Bradi1g17280	0.447941	0.663269	0.857538	1.19449	1.07121	2.07133	9.4228	0.0001441	0.000203306
Bradi1g17290	1.27989	0.959391	0.27213	-1.64505	-2.80072	2.2089	68.197	3.75e-11	2.37e-10
Bradi1g17300	0.367271	1.27473	0.76262	1.05065	1.04178	2.24261	11.0115	5.35e-05	8.05e-05
Bradi1g17340	0.00372617	-0.0900027	-0.0707406	0.0817315	0.37333	6.6705	9.8893	0.000106505	0.000153068
Bradi1g17390	0.181867	-0.348905	0.0849428	0.572984	0.837792	4.62288	15.0243	7.73e-06	1.34e-05
Bradi1g17410	-0.193504	-0.104596	-0.138685	-1.37953	-1.9874	6.07279	188.597	5.01e-15	1.83e-13
Bradi1g17430	-1.87657	-1.91725	0.233025	0.989769	0.627542	3.42728	50.2382	1.09e-09	4.46e-09
Bradi1g17440	-0.225228	-0.158742	0.238569	0.677252	0.917525	5.15665	21.7695	5.46e-07	1.18e-06
Bradi1g17450	0.187841	-0.0867359	-0.00789928	0.840049	1.14882	5.89164	25.6669	2.32e-07	5.43e-07
Bradi1g17460	0.712089	0.222596	-0.573685	0.101723	1.92515	5.57851	73.8646	5.98e-11	3.53e-10
Bradi1g17480	-0.572291	-0.487321	0.257859	1.35981	-0.1497	5.99611	62.5695	1.38e-10	7.29e-10
Bradi1g17490	0.375084	0.820115	-0.174777	-0.770329	-1.0706	6.08668	138.189	7.92e-14	1.44e-12
Bradi1g17500	0.197374	-0.113312	0.100909	0.527998	-0.232238	4.65054	15.516	5.13e-06	9.22e-06
Bradi1g17510	-0.0189502	-0.170501	0.288343	0.955302	0.559759	5.96384	32.3456	1.89e-08	5.66e-08
Bradi1g17590	0.544411	0.319083	0.203186	0.277088	0.138419	5.93992	8.0463	0.000373964	0.00049646
Bradi1g17620	0.173914	-0.0622872	-0.370035	-0.664453	0.0838772	3.69309	14.709	7.49e-06	1.31e-05
Bradi1g17630	1.04343	1.03329	0.491184	0.430267	-0.224548	5.92737	87.2307	4.48e-12	3.93e-11
Bradi1g17640	-1.50873	-2.79171	-4.44657	-4.47969	-4.22205	2.44771	116.936	4.15e-13	5.45e-12
Bradi1g17650	0.146756	-0.0119122	0.0697766	0.453356	0.91953	3.98405	14.9114	6.81e-06	1.2e-05
Bradi1g17660	1.54368	2.20219	1.9436	0.691292	-0.377028	1.53525	14.1865	1.24e-05	2.07e-05
Bradi1g17665	-0.41377	-0.235415	-0.124619	-0.507243	-0.853725	6.31543	16.3383	3.55e-06	6.58e-06
Bradi1g17670	0.802915	0.495179	-0.996802	-3.01007	-1.9396	1.79652	37.8523	5.87e-09	1.98e-08
Bradi1g17680	-0.0610821	0.0739218	-0.456382	-1.34614	-0.302878	7.58125	42.633	1.98e-09	7.52e-09
Bradi1g17710	0.190134	0.330667	0.287905	0.35098	0.35992	6.42613	4.52766	0.00741273	0.00841123
Bradi1g17730	-0.0608539	-0.251076	0.622127	1.32883	0.978483	5.70881	115.231	3.93e-13	5.22e-12
Bradi1g17762	0.0403483	0.0851385	0.913142	1.2895	-0.315066	4.46918	41.0169	3.05e-09	1.1e-08
Bradi1g17810	0.620279	1.2704	-0.501797	-1.24039	-0.0275414	4.34316	27.342	3.43e-07	7.74e-07
Bradi1g17820	1.19554	0.942883	0.426744	-0.651664	-0.491147	7.79823	163.405	1.79e-14	4.65e-13
Bradi1g17830	0.455086	0.785432	1.16422	0.977268	0.489119	5.70879	14.3733	1.37e-05	2.28e-05
Bradi1g17840	-0.208831	0.465588	1.77623	1.64571	0.951483	10.122	66.3289	5.5e-11	3.28e-10
Bradi1g17850	1.18496	2.39401	2.48069	0.857082	-1.60893	7.5926	104.059	1.24e-11	9.23e-11
Bradi1g17870	-0.348387	-0.0482496	1.97239	2.61333	1.32224	6.49775	64.6752	1.33e-09	5.28e-09
Bradi1g17900	0.103042	0.0855109	0.271478	0.306105	0.471963	6.04703	14.4083	8.66e-06	1.49e-05
Bradi1g17950	0.160302	0.086982	0.594934	1.03546	0.62287	6.36688	33.6824	1.36e-08	4.23e-08
Bradi1g17980	-0.279668	-0.211557	0.0794864	0.00947945	1.78332	2.27152	38.8189	4.29e-09	1.5e-08
Bradi1g17990	-0.0422481	0.0965903	0.177829	-0.00924247	-0.145008	5.87949	5.67155	0.00252967	0.00301872
Bradi1g18020	0.236414	0.228105	-0.560485	-1.74438	-0.28925	7.49428	135.103	9.66e-14	1.69e-12
Bradi1g18030	0.0319079	0.254531	-0.329016	-0.303406	-1.03363	4.78873	36.3464	7.35e-09	2.44e-08
Bradi1g18035	0.414552	0.253735	0.280707	0.239714	-0.279788	3.09213	9.86496	0.000108172	0.000155242
Bradi1g18050	-0.299309	-0.592046	-0.681707	-1.24536	-1.05361	9.80248	22.3459	3.56e-07	8.01e-07
Bradi1g18070	-0.101975	-0.187138	-0.196148	0.0816312	0.0738391	6.25391	4.97907	0.00478256	0.00553683
Bradi1g18080	-0.222607	-0.160536	0.286503	0.319301	-0.649215	3.09946	13.8827	1.12e-05	1.9e-05
Bradi1g18110	-0.27688	-0.0652889	-0.229581	-0.470809	-0.378819	4.57823	5.97347	0.00194031	0.00234797
Bradi1g18120	-0.238557	-0.186703	0.0587927	0.590678	0.228523	6.71686	29.9753	3.48e-08	9.76e-08
Bradi1g18130	-0.209891	-0.225483	0.0362315	-0.0919424	0.284905	3.75265	4.93671	0.00497932	0.00575511
Bradi1g18160	0.0494258	-0.00233297	0.0101704	0.198885	0.34857	5.46247	5.36178	0.0033465	0.00394464
Bradi1g18165	-0.157532	0.46403	-0.0021316	-0.722335	0.305773	2.37301	16.3777	3.48e-06	6.47e-06
Bradi1g18170	-0.352967	-0.609231	-1.15583	-1.39316	0.0493626	5.41885	61.5951	8.96e-11	5.02e-10
Bradi1g18180	0.0952681	0.0102493	0.212127	0.540413	0.269519	6.30465	19.0149	1.17e-06	2.38e-06
Bradi1g18220	0.154404	0.516861	0.717219	0.94378	0.269821	2.28266	8.1592	0.000344533	0.000459892
Bradi1g18250	-0.0855084	-0.0132463	0.314849	0.275629	0.569189	4.03547	8.70557	0.000233993	0.000319954
Bradi1g18300	0.172987	-0.0393353	1.3763	1.43951	1.99411	3.72546	110.371	5.73e-13	7.07e-12
Bradi1g18320	0.378036	-0.0504454	-0.539776	-0.633057	0.597175	6.36183	58.4602	1.4e-10	7.35e-10
Bradi1g18347	-0.2302	-0.110565	0.260155	0.569164	0.000188468	4.26382	11.033	5.28e-05	7.95e-05
Bradi1g18360	-0.407027	-0.570348	0.0512463	0.564897	-0.982493	4.83549	12.7582	4.91e-05	7.44e-05
Bradi1g18370	-0.018221	0.323992	0.305007	0.494073	0.0639697	4.2743	4.51033	0.00754138	0.00854997
Bradi1g18380	0.418712	0.848961	1.0468	0.339708	-0.0203656	2.89584	19.6609	9.1e-07	1.89e-06
Bradi1g18407	0.347813	0.0476137	-0.540622	-0.675799	-0.245282	3.53208	12.3496	2.5e-05	3.97e-05
Bradi1g18430	0.0990839	0.467693	0.324916	0.459925	-0.335503	4.31613	16.0291	4.07e-06	7.46e-06
Bradi1g18450	0.303376	0.557552	0.596062	0.727855	-0.0998153	6.74646	47.0356	8.74e-10	3.66e-09
Bradi1g18460	0.0484983	-0.0800756	-0.332372	-0.1498	0.402715	4.1634	10.3061	8.2e-05	0.000119845
Bradi1g18490	-0.113092	-0.412406	-0.572276	-0.782298	-0.988743	4.1524	27.4892	6.92e-08	1.82e-07
Bradi1g18500	-0.271364	0.519386	1.03148	1.23117	0.220714	3.48319	54.9288	2.37e-10	1.17e-09
Bradi1g18510	0.334416	0.121573	0.351821	0.620859	0.819663	4.25334	13.7621	1.19e-05	2e-05
Bradi1g18531	0.226763	0.356371	0.317592	0.341097	0.547092	3.89844	8.88226	0.000207165	0.000285428
Bradi1g18537	-0.550071	-0.483747	-0.366672	-0.339786	-0.592606	6.75695	8.15381	0.000345879	0.000461573
Bradi1g18550	-0.144693	-0.0281013	0.317988	0.75585	0.836441	7.54594	65.5711	5.25e-11	3.15e-10
Bradi1g18560	-0.0144227	-0.10733	-0.905114	-1.70965	-0.947724	3.42347	53.5422	2.94e-10	1.41e-09
Bradi1g18570	0.012681	-0.0917285	-0.0965481	0.471772	1.21196	5.08148	65.9896	4.97e-11	3.01e-10
Bradi1g18595	-0.408529	-0.306908	-0.107142	-0.0596585	-1.07269	5.06268	16.1999	4.03e-06	7.4e-06
Bradi1g18600	0.224354	-0.188014	-0.279695	-0.100705	-0.689445	7.11036	36.3816	7.29e-09	2.42e-08
Bradi1g18607	0.779485	0.657798	0.437305	0.416106	0.409292	5.71487	11.3169	4.47e-05	6.81e-05
Bradi1g18650	0.215389	-0.0905115	-2.24051	-4.74822	-0.0309977	8.66792	221.04	1.93e-15	9.3e-14
Bradi1g18660	-0.407289	-0.864671	-1.49373	-1.53542	0.531274	6.06532	233.258	7.5e-16	4.9e-14
Bradi1g18680	-0.270759	-0.366112	-0.0732817	0.0151184	0.275774	3.56289	10.0402	9.68e-05	0.000139845
Bradi1g18700	-0.101722	-0.126198	0.211222	0.455705	0.942346	4.49176	67.5853	4.05e-11	2.53e-10
Bradi1g18702	-0.157625	-0.328059	-0.075608	0.586748	0.411998	2.70117	11.928	3.15e-05	4.92e-05
Bradi1g18720	-0.185913	0.0138102	-0.133944	-0.0658704	1.11709	3.4923	15.4954	6.04e-06	1.07e-05
Bradi1g18740	-0.385767	-0.27629	0.396116	0.53696	0.136152	4.18663	16.3768	3.49e-06	6.48e-06
Bradi1g18750	0.668518	0.698965	0.702076	0.794281	0.240419	5.16505	43.4545	1.69e-09	6.54e-09
Bradi1g18770	0.119992	0.221483	0.269001	0.407154	0.658339	4.5258	9.70033	0.000120239	0.00017152
Bradi1g18780	0.753028	0.433875	-0.167427	-0.753214	-1.06914	9.79755	101.241	1.22e-12	1.33e-11
Bradi1g18790	0.944484	0.797311	1.08758	1.39686	1.46423	5.43172	17.8668	3.67e-06	6.79e-06
Bradi1g18793	-0.264604	-0.416343	0.583012	0.868419	0.660112	3.37258	31.2309	2.51e-08	7.29e-08
Bradi1g18800	0.194852	0.254274	1.60722	0.342792	-0.374487	5.35424	80.5997	8.88e-12	6.95e-11
Bradi1g18810	-0.191169	-0.542672	-0.396657	-0.154998	0.520008	4.81238	40.8032	2.84e-09	1.04e-08
Bradi1g18822	0.653024	0.766012	1.03042	1.16663	0.538051	2.58413	10.9417	5.57e-05	8.36e-05
Bradi1g18840	0.437255	0.572078	0.836289	1.03	0.952538	3.31651	17.246	2.4e-06	4.6e-06
Bradi1g18900	-0.288849	-0.428229	-0.321386	0.25043	0.716144	3.63869	20.8882	5.77e-07	1.25e-06
Bradi1g18910	0.333441	0.417411	0.57327	1.11152	0.90042	6.18714	45.6944	1.11e-09	4.53e-09
Bradi1g18920	-0.015493	0.622179	5.24629	8.73142	5.34463	3.98611	302.917	9.69e-16	5.89e-14
Bradi1g18930	-0.165417	-0.197137	-0.0428531	0.141689	0.214715	3.884	5.18742	0.00393139	0.00459438
Bradi1g18960	-0.0297167	-0.394074	-0.366679	-1.04194	-0.717974	4.9861	20.1078	7.69e-07	1.62e-06
Bradi1g18980	-0.29751	-0.419018	-0.20976	0.0350238	-0.088907	4.7009	6.62125	0.00112433	0.00140176
Bradi1g19010	-0.995782	-1.24012	-0.707949	-3.18303	-2.69586	8.22375	209.742	1.94e-15	9.32e-14
Bradi1g19030	-0.141678	-0.314915	0.0237062	0.369393	0.0756612	4.54297	12.6894	2.08e-05	3.35e-05
Bradi1g19050	0.00407619	-0.760429	-0.491871	-1.09346	0.563743	2.03361	22.7848	2.98e-07	6.81e-07
Bradi1g19080	0.0356122	-0.302449	-1.32119	-1.7411	0.601976	9.30956	176.448	9.06e-15	2.77e-13
Bradi1g19110	-0.253408	-0.0783768	0.175876	0.495592	0.262813	5.05323	9.43145	0.000143282	0.00020224
Bradi1g19120	-0.280037	-0.385391	-0.175412	-0.557562	-0.841471	5.1389	26.1136	1.04e-07	2.62e-07
Bradi1g19140	-0.0133753	-0.230508	-1.01886	-1.47427	0.102069	6.22621	190.629	4.55e-15	1.72e-13
Bradi1g19150	-0.555519	-0.578337	-0.13488	0.319558	0.0228802	2.41864	11.5147	3.99e-05	6.12e-05
Bradi1g19160	-0.576811	-0.757451	-0.268152	0.144425	-0.200802	6.78045	19.0265	1.16e-06	2.37e-06
Bradi1g19210	0.176353	0.423483	0.491043	0.0240637	0.0363108	7.51399	10.7426	6.28e-05	9.35e-05
Bradi1g19220	0.2286	-0.488675	-1.53588	-2.86148	-1.17547	8.01895	57.6931	1.15e-09	4.65e-09
Bradi1g19230	0.317662	-0.155441	0.545242	0.936785	0.49945	5.78655	29.3733	4.09e-08	1.13e-07
Bradi1g19250	-0.20525	-0.749044	-1.5213	-2.56144	-0.342399	7.85434	128.823	1.47e-13	2.36e-12
Bradi1g19260	0.840694	0.886494	1.09719	1.53077	1.74338	2.31845	12.0015	3.03e-05	4.74e-05
Bradi1g19270	0.236249	-0.28051	0.0980606	1.05616	1.52388	5.92708	188.591	5.01e-15	1.83e-13
Bradi1g19300	0.31897	0.104456	-0.101737	-0.231742	-0.175999	3.58016	4.48502	0.00773369	0.00875506
Bradi1g19340	-0.231386	-0.0686461	0.0702254	-0.0257456	0.0623394	6.52773	4.49703	0.00764181	0.00865713
Bradi1g19370	0.288668	0.341658	0.559591	0.535573	0.437118	5.67254	8.61341	0.000249497	0.000339797
Bradi1g19390	0.249966	0.641577	0.288478	-0.0348462	-0.0964302	6.3774	35.0874	9.79e-09	3.15e-08
Bradi1g19420	1.18941	1.38348	1.71327	1.94371	1.85701	2.05698	10.8947	5.82e-05	8.71e-05
Bradi1g19450	0.0802346	-0.104428	-0.326909	0.497132	0.926574	2.8218	14.8102	7.14e-06	1.25e-05
Bradi1g19500	0.277753	0.324686	0.439468	0.656096	0.457093	3.1744	7.27636	0.000667145	0.000854868
Bradi1g19510	-0.0890686	-0.195002	0.00808687	0.339387	-0.0603527	6.02406	12.483	2.32e-05	3.71e-05
Bradi1g19530	-0.277848	-0.190017	-0.0505757	-0.482406	-0.615475	7.5924	18.752	1.29e-06	2.61e-06
Bradi1g19550	-0.369787	-0.12239	-0.0381412	-0.0913005	-0.598522	4.20409	5.17529	0.0039761	0.00464479
Bradi1g19570	-0.153428	0.0996103	0.0453061	-0.190651	-0.495695	5.22251	7.09446	0.000768994	0.000978289
Bradi1g19591	-0.246031	0.176799	-0.0118231	0.58441	-0.450289	2.07011	7.34701	0.000631685	0.000811755
Bradi1g19620	0.215719	0.561574	0.409049	0.703686	0.892815	3.14851	11.094	5.09e-05	7.7e-05
Bradi1g19627	0.223218	0.135409	0.600556	0.999122	0.78813	4.98554	18.7221	1.4e-06	2.8e-06
Bradi1g19650	0.160863	0.161306	0.228052	0.616912	0.536657	7.53601	18.7013	1.32e-06	2.66e-06
Bradi1g19660	-0.0794019	-0.584102	-2.3914	-3.9264	-3.36885	5.24334	318.801	4.55e-17	6.98e-15
Bradi1g19670	-0.694577	-0.696757	-0.357311	0.368763	1.08098	3.74905	96.775	1.81e-12	1.82e-11
Bradi1g19690	0.236325	0.299804	0.536162	0.916688	0.517764	5.86802	17.2785	2.36e-06	4.54e-06
Bradi1g19698	-0.582904	-0.735467	-0.726358	-0.582476	-0.668359	5.30364	12.199	2.71e-05	4.28e-05
Bradi1g19702	0.552023	-0.0780935	-0.876351	-0.947655	-1.4778	5.42838	99.0087	1.48e-12	1.55e-11
Bradi1g19710	-0.0938298	-0.118014	-0.239474	-0.266312	-0.349327	5.01887	4.91819	0.00506812	0.0058548
Bradi1g19713	1.14245	0.784501	0.115517	-1.56949	-1.23512	4.03374	20.1212	5.01e-06	9.02e-06
Bradi1g19716	0.70079	0.147649	0.424574	-0.855208	-1.23585	2.09177	19.5204	9.61e-07	1.99e-06
Bradi1g19720	0.259479	1.23679	0.867218	0.191715	-1.25855	3.5097	36.1571	9.06e-09	2.93e-08
Bradi1g19730	-0.191616	-0.39275	-0.106297	-0.673956	-0.485746	6.6806	11.6584	3.67e-05	5.68e-05
Bradi1g19750	-0.139914	-0.454498	-0.741424	-1.09593	-1.17958	2.08349	17.5371	2.12e-06	4.11e-06
Bradi1g19790	0.501679	0.0321502	-0.689664	-0.65767	2.35822	2.96316	134.576	1e-13	1.74e-12
Bradi1g19810	-0.360483	-0.869124	-1.24826	-1.69407	-1.0321	6.26767	80.3962	9.08e-12	7.08e-11
Bradi1g19830	-0.234427	-0.227832	-0.125179	-0.767026	-0.758287	6.04239	32.431	1.85e-08	5.56e-08
Bradi1g19850	-0.20161	0.0996343	0.115976	-0.262948	-0.277616	4.3875	7.18268	0.000717602	0.000916022
Bradi1g19860	-0.476829	-0.23559	-0.783718	-0.889577	-0.740194	5.09541	6.91996	0.00128208	0.00158663
Bradi1g19870	-0.0763585	-0.0331774	0.401938	0.442033	-0.223533	3.85553	15.0084	6.5e-06	1.15e-05
Bradi1g19920	0.082949	0.00734532	0.278061	0.66866	1.0795	5.58505	55.7458	2.09e-10	1.05e-09
Bradi1g19940	-0.138733	0.0856441	0.246902	0.379919	0.600042	3.19897	6.36827	0.00138627	0.0017077
Bradi1g19970	0.0215144	-0.191904	-0.24124	-0.362003	0.277323	7.38797	24.9203	1.49e-07	3.65e-07
Bradi1g20050	0.505385	0.474647	1.94035	2.60926	2.18983	4.25042	105.863	8.26e-13	9.53e-12
Bradi1g20067	-0.0290352	0.54182	0.329848	0.266724	0.142359	3.13013	4.72191	0.00612439	0.00700814
Bradi1g20080	-0.322154	-0.321782	-0.709996	-0.890672	-1.0125	4.70822	31.6756	2.24e-08	6.59e-08
Bradi1g20085	-0.747616	-0.724122	-1.06071	-0.533623	-1.08288	2.55692	16.866	2.82e-06	5.33e-06
Bradi1g20100	-0.350509	-0.887362	-0.616421	-1.92276	-0.649539	6.63722	88.3354	4.01e-12	3.58e-11
Bradi1g20125	2.00027	1.24237	1.28348	1.28769	1.23741	2.06201	7.79776	0.00048452	0.000631563
Bradi1g20140	-0.375562	-0.593372	-0.141796	0.0895985	-0.0401682	3.56488	12.6586	2.12e-05	3.4e-05
Bradi1g20160	1.01085	-0.594166	-1.58138	-1.55593	-1.72351	4.7025	172.802	1.09e-14	3.2e-13
Bradi1g20170	0.553746	0.858182	0.388571	0.126878	0.36892	4.53544	18.0624	1.71e-06	3.36e-06
Bradi1g20180	-0.340401	-0.140208	-0.191293	-0.169926	0.62447	4.95321	37.3862	5.84e-09	1.97e-08
Bradi1g20185	-0.345984	-0.0539011	-0.215369	-1.93192	-1.49665	2.58264	21.5926	4.86e-07	1.07e-06
Bradi1g20210	0.548012	0.91663	0.428828	0.54991	0.578657	2.26756	4.88654	0.00522396	0.0060266
Bradi1g20220	-0.361114	-0.547614	-0.673719	-0.914667	-1.10391	9.01669	23.9041	2.06e-07	4.89e-07
Bradi1g20230	0.462761	0.543949	0.837845	1.51428	1.2165	1.72185	16.7618	2.95e-06	5.56e-06
Bradi1g20240	-2.32363	-3.74047	-4.84341	-5.27297	-6.71195	4.57591	112.916	6.97e-11	4.03e-10
Bradi1g20250	-0.443676	-0.418305	-1.37773	-2.51083	-2.60294	3.51872	58.2255	1.95e-10	9.87e-10
Bradi1g20260	-3.13854	-3.94189	-4.02925	-3.87959	-3.25161	4.74277	156.295	5.69e-13	7.05e-12
Bradi1g20270	0.224225	-0.0458124	-0.380254	-0.613284	-0.484719	5.07697	20.7807	6e-07	1.29e-06
Bradi1g20290	-0.21503	-0.236129	-0.231282	-0.87778	-0.995898	4.18305	35.6468	8.61e-09	2.81e-08
Bradi1g20300	-0.173428	0.0157708	-0.225382	-0.353222	-0.0488774	3.6734	4.4157	0.0082886	0.00935234
Bradi1g20313	0.243653	-0.306608	-1.02364	-1.2555	-0.396894	3.0812	40.1433	3.25e-09	1.17e-08
Bradi1g20320	-0.342418	-0.423632	-0.407358	-0.00630994	-0.305548	4.32674	5.20675	0.00386129	0.00451573
Bradi1g20330	0.0255539	0.0439815	-0.586567	-0.856899	-0.854754	5.15958	46.9825	8.82e-10	3.69e-09
Bradi1g20360	-0.0812135	-0.234003	-0.748376	-0.896852	-0.137127	4.23444	22.8212	2.94e-07	6.73e-07
Bradi1g20370	-0.355038	-0.339172	-1.34836	-1.96603	-0.454648	6.26815	106.99	7.53e-13	8.82e-12
Bradi1g20380	-0.734134	-0.484328	-0.701232	-0.918731	-0.664287	3.15703	6.3491	0.00140872	0.00173428
Bradi1g20385	-0.553765	-0.658019	-0.982133	-0.536534	0.0134653	2.3628	14.1022	1.01e-05	1.72e-05
Bradi1g20390	0.157995	0.180146	-0.172394	-0.0684052	-0.512465	6.05372	24.9787	1.46e-07	3.59e-07
Bradi1g20400	-0.23356	-0.314114	-0.215274	-0.164989	-0.0517782	6.33024	5.30368	0.00352999	0.00414757
Bradi1g20410	0.00566739	-0.0466627	-0.00163798	0.251651	0.563395	5.32677	13.6864	1.24e-05	2.08e-05
Bradi1g20440	-0.199251	0.0564287	-1.01037	0.112112	1.49538	6.81351	14.5942	4.82e-05	7.3e-05
Bradi1g20460	0.357298	0.0822425	-1.05207	-1.83902	-2.53042	6.83239	78.9696	7.06e-11	4.08e-10
Bradi1g20480	-2.49652	-1.17543	-2.97615	-4.69726	-3.85445	2.42339	50.2662	2e-09	7.6e-09
Bradi1g20490	-0.114395	-0.0634747	0.214313	0.309706	-0.261129	5.40779	18.5752	1.39e-06	2.78e-06
Bradi1g20500	-0.157639	-0.570982	-0.675618	-0.449793	0.211966	2.52041	11.6485	3.69e-05	5.71e-05
Bradi1g20510	0.568581	0.346092	0.738903	0.721455	0.850845	5.1308	6.90125	0.00110993	0.0013853
Bradi1g20520	0.241264	0.0221351	1.25647	2.42414	1.5555	6.21654	221.65	1.18e-15	6.62e-14
Bradi1g20527	-0.385075	-0.255797	0.215793	0.204074	0.105705	2.84632	5.59335	0.00271278	0.00322838
Bradi1g20540	-0.195994	-0.178526	-0.322571	-0.0932792	-0.556828	3.2341	6.15569	0.00165899	0.00202413
Bradi1g20560	-0.312522	-0.501429	-0.279515	-0.283784	-0.67392	7.02386	26.0236	1.06e-07	2.68e-07
Bradi1g20580	-0.412323	-0.435567	-0.412787	-0.385057	-0.547162	5.16643	5.60785	0.00267775	0.0031874
Bradi1g20586	-0.222991	-0.390979	0.289763	0.231363	0.586941	4.08046	22.7595	3e-07	6.86e-07
Bradi1g20610	0.256263	0.447652	0.0492695	-0.432302	-0.342455	3.93691	23.9203	2.05e-07	4.86e-07
Bradi1g20620	0.0462574	-0.0129288	0.115624	0.150372	0.316599	5.48197	5.94783	0.00198396	0.00239745
Bradi1g20630	-0.0121943	0.0400863	0.276862	0.144226	0.205474	5.08447	4.5835	0.00701427	0.00797427
Bradi1g20640	0.798227	0.632686	-0.188372	-1.59291	-1.32726	3.94539	113.342	4.54e-13	5.83e-12
Bradi1g20650	-0.0711417	-0.101943	-0.0382212	-0.0164967	-0.467718	4.85907	7.21367	0.000700456	0.000895586
Bradi1g20670	-0.294598	-0.318796	-0.580303	-0.203643	-0.534405	3.89242	4.70314	0.00623749	0.00713299
Bradi1g20720	-0.394802	-0.384222	-0.0435394	0.192821	0.74343	4.77961	67.4656	4.11e-11	2.56e-10
Bradi1g20730	-0.253544	-0.71592	-0.91059	-1.42356	-0.493859	6.37072	81.5394	8.04e-12	6.43e-11
Bradi1g20750	0.064276	-0.0441105	0.317717	0.760748	1.00766	3.4798	27.3651	7.17e-08	1.88e-07
Bradi1g20760	0.279221	0.274495	0.544357	0.701443	0.621388	4.21636	14.6938	7.55e-06	1.32e-05
Bradi1g20770	-0.178589	-0.238546	0.00682382	0.119287	-0.308614	5.85494	11.2277	4.71e-05	7.15e-05
Bradi1g20780	-0.0620011	-0.702407	-0.790071	-1.18588	1.23539	2.73009	47.4125	8.17e-10	3.45e-09
Bradi1g20790	0.166333	-0.00204697	-0.375171	-0.988453	-0.264541	3.80354	24.7977	1.55e-07	3.78e-07
Bradi1g20820	-0.317708	-0.651801	-0.416764	-0.37778	-0.18069	3.66588	5.10577	0.00424327	0.00494235
Bradi1g20830	0.0834999	-0.0497445	0.218732	0.0719968	0.72421	4.74802	21.4042	4.8e-07	1.05e-06
Bradi1g20840	0.0825417	-0.6662	-0.427153	0.293571	0.394822	3.3357	16.9611	2.7e-06	5.13e-06
Bradi1g20860	0.116899	-0.776343	-2.81285	-4.38104	-0.379385	4.55583	343.788	2.31e-17	4.59e-15
Bradi1g20870	-0.033459	-0.323456	-0.373058	0.0319241	0.549063	5.72552	35.0689	9.83e-09	3.16e-08
Bradi1g20900	-0.0356405	0.0419896	0.148874	0.185376	0.432625	5.52226	12.5061	2.3e-05	3.67e-05
Bradi1g20920	-0.0450001	2.32996	8.11025	8.44725	2.14586	1.54414	177.788	8.47e-15	2.65e-13
Bradi1g20925	0.0335301	0.381095	0.55385	0.283149	0.620514	3.33564	5.29751	0.00355012	0.00416909
Bradi1g20930	-0.84825	-0.490605	0.615652	0.876449	0.601636	6.09673	53.4885	3.85e-10	1.79e-09
Bradi1g20950	-0.0554327	0.426167	-0.126999	-1.9455	0.692421	6.48218	5.61744	0.00605552	0.00693278
Bradi1g20995	0.272165	0.478665	0.783234	1.09804	0.510931	6.2468	51.0398	4.4e-10	2.01e-09
Bradi1g21018	0.494663	-0.505598	0.138448	0.029051	-0.889009	4.99876	17.9554	2.88e-06	5.44e-06
Bradi1g21040	0.191636	-0.119214	-0.345597	0.244554	1.58624	4.89015	107.685	7.12e-13	8.42e-12
Bradi1g21060	-0.106469	-0.0206279	0.179904	0.42408	-0.150695	6.14422	23.1271	2.66e-07	6.15e-07
Bradi1g21070	-0.0646443	-0.15176	-0.078393	-0.206821	-0.592461	5.10769	10.6193	6.76e-05	0.000100239
Bradi1g21080	-0.203887	-0.790356	-0.671902	-0.574927	0.035071	5.00241	13.0473	1.9e-05	3.07e-05
Bradi1g21095	-1.00342	-1.19223	2.43309	3.54644	-0.131287	2.37674	28.8058	5.04e-07	1.1e-06
Bradi1g21097	0.940343	0.716082	-0.382157	-0.0357155	-0.0655087	4.87554	27.642	7.86e-08	2.04e-07
Bradi1g21110	-0.0455839	-0.188665	-0.024366	0.526949	0.619167	4.14335	22.5671	3.21e-07	7.28e-07
Bradi1g21120	-0.523008	-0.31205	0.00922041	0.168392	-0.0466487	3.68141	9.1867	0.000168567	0.000235289
Bradi1g21146	0.621175	0.0639171	-0.140976	0.457066	0.816339	2.80676	4.91833	0.00543934	0.00626073
Bradi1g21177	0.0880672	0.400184	0.504792	0.596725	0.540761	6.08207	11.0674	5.17e-05	7.8e-05
Bradi1g21190	0.14659	0.503191	1.09844	1.33993	0.745823	3.26238	65.3571	5.4e-11	3.23e-10
Bradi1g21210	-0.111827	0.32826	-0.128434	-0.291769	-0.973777	5.34883	39.0704	4.07e-09	1.43e-08
Bradi1g21221	-0.264013	0.0942346	0.186626	-0.186063	-0.588955	5.95627	13.2838	1.52e-05	2.51e-05
Bradi1g21230	0.228269	-0.0399727	0.497854	-0.689548	-1.29161	2.26228	24.8558	1.52e-07	3.72e-07
Bradi1g21260	0.215528	0.0198969	-0.311773	-0.313224	-0.87739	6.69883	58.9343	1.3e-10	6.93e-10
Bradi1g21290	-0.177549	-0.00799826	0.135596	0.653356	0.250858	4.07122	16.7791	2.93e-06	5.52e-06
Bradi1g21300	0.0670569	0.110696	-0.534699	-0.795577	0.249382	4.86146	25.2015	1.37e-07	3.37e-07
Bradi1g21310	0.957948	0.507113	-0.801255	-0.778735	-0.928199	5.86006	131.94	1.19e-13	1.99e-12
Bradi1g21330	0.677218	1.39154	0.641106	-0.210885	-0.3041	9.53439	141.545	6.4e-14	1.24e-12
Bradi1g21337	0.186652	0.677812	0.416143	0.694977	0.576927	4.5564	13.0485	1.72e-05	2.81e-05
Bradi1g21350	-0.185318	-0.311178	-1.74052	-2.62328	-2.17262	1.8777	69.74	3.1e-11	2e-10
Bradi1g21360	0.175095	0.566999	0.543306	0.291124	-0.454596	5.6754	26.8139	8.41e-08	2.17e-07
Bradi1g21380	-0.249174	-0.424903	-0.486122	-0.191442	0.385655	5.35513	33.6983	1.36e-08	4.21e-08
Bradi1g21390	-0.137406	-0.25823	-0.0630851	0.065493	0.33473	5.41216	13.5878	1.3e-05	2.17e-05
Bradi1g21400	-0.251223	-0.151742	-0.0385492	0.47371	-0.0819181	5.83292	19.2811	1.05e-06	2.16e-06
Bradi1g21410	-0.288372	-0.37791	-0.318284	-0.457729	-0.115685	4.66788	9.02527	0.000187935	0.000260449
Bradi1g21440	0.0377472	-0.0897962	-0.101448	0.00867286	0.617649	5.12529	11.7109	3.56e-05	5.52e-05
Bradi1g21470	-0.454971	-0.366609	0.0846932	0.166565	0.552527	2.96552	19.1753	1.1e-06	2.24e-06
Bradi1g21480	0.10574	0.0343012	-0.118816	-0.143827	0.300874	5.25813	11.3119	4.48e-05	6.83e-05
Bradi1g21490	0.276195	0.400106	-0.49694	-0.71432	-0.887185	7.50425	50.4951	4.82e-10	2.18e-09
Bradi1g21497	0.866906	0.8376	0.674147	0.485781	0.33977	3.4701	9.57303	0.000130592	0.000185402
Bradi1g21540	0.224283	0.649946	1.15898	0.246771	0.0635363	3.23206	13.8936	1.12e-05	1.89e-05
Bradi1g21570	-2.50237	-1.8577	-2.80268	-1.18184	-2.46098	2.91953	7.69344	0.00134332	0.00165821
Bradi1g21580	0.14565	0.254814	0.83091	1.08676	0.803668	7.33804	49.2583	5.93e-10	2.62e-09
Bradi1g21590	-0.614973	-0.486792	-0.838106	-1.40475	-1.48185	4.0902	31.3013	2.46e-08	7.18e-08
Bradi1g21610	0.190819	0.591277	1.10106	1.01954	-0.320479	5.72934	44.748	1.47e-09	5.81e-09
Bradi1g21620	-0.130917	-0.0317706	-0.183792	0.19254	0.358912	4.10614	13.6341	1.27e-05	2.13e-05
Bradi1g21647	-0.196026	-0.72077	-0.333552	-0.291475	-0.242251	2.29552	4.76354	0.00588162	0.00674327
Bradi1g21700	0.277103	0.586587	0.956493	0.890844	0.482207	6.64186	37.1404	6.16e-09	2.07e-08
Bradi1g21710	-0.346834	-0.420349	-0.361998	-0.263823	-0.367294	4.60871	7.10234	0.000764243	0.000972706
Bradi1g21720	-0.420636	-0.281761	-0.229866	-0.340985	-0.604817	5.50688	5.75553	0.00235806	0.00282399
Bradi1g21740	-0.126843	-0.398662	-0.174377	-0.00795363	0.335397	5.57581	20.9742	5.6e-07	1.21e-06
Bradi1g21755	-0.00469168	0.271224	0.716673	1.27306	0.292116	6.18812	87.5969	4.32e-12	3.81e-11
Bradi1g21770	-0.171551	-0.330524	-0.0244426	0.428897	-0.236249	6.00982	23.919	2.05e-07	4.86e-07
Bradi1g21780	-0.10403	-0.920609	-1.50079	-2.54534	-1.04791	6.76457	171.962	1.14e-14	3.31e-13
Bradi1g21787	0.422853	-0.0728801	-0.102851	0.097207	-0.454902	6.03929	21.8281	4.14e-07	9.18e-07
Bradi1g21800	-0.309345	-0.800043	0.104892	0.59544	0.69544	1.98983	13.6168	1.28e-05	2.14e-05
Bradi1g21820	0.148914	0.233773	0.181333	0.389839	0.471208	5.31372	9.51196	0.000135906	0.000192505
Bradi1g21880	0.0802005	0.90249	0.359052	0.949189	-0.414616	2.41787	27.4986	6.9e-08	1.82e-07
Bradi1g21890	0.209518	-0.231642	-0.0385769	0.293309	0.936503	2.13309	13.2494	1.55e-05	2.55e-05
Bradi1g21900	-0.782558	-1.23931	-0.98635	-0.376531	-0.513311	4.09574	23.8551	2.09e-07	4.96e-07
Bradi1g21914	0.114779	-0.110723	0.141549	0.425262	0.617588	2.70448	6.38295	0.00136936	0.00168764
Bradi1g21922	0.336702	0.462067	-0.531766	-0.502377	-0.403242	4.88724	27.9858	6e-08	1.61e-07
Bradi1g21990	0.00305813	-0.115536	-1.04328	-0.756427	0.202923	4.34401	40.1132	3.27e-09	1.18e-08
Bradi1g22020	0.142486	0.143443	0.169708	0.601208	-0.458299	7.50131	39.2149	3.94e-09	1.39e-08
Bradi1g22037	0.353323	0.383855	0.36146	0.766471	0.601192	4.46457	15.3679	5.5e-06	9.82e-06
Bradi1g22050	-0.367141	-1.60827	-0.669061	-0.149412	-1.89064	5.97056	77.6758	1.43e-11	1.04e-10
Bradi1g22087	0.26781	0.470168	0.206891	0.177176	-0.504871	4.09066	14.3861	8.76e-06	1.51e-05
Bradi1g22101	-0.264358	-0.338172	-0.773077	-1.45387	-1.64103	7.43321	92.1017	2.79e-12	2.63e-11
Bradi1g22110	1.37495	1.3805	-0.871859	-0.941152	-0.312645	4.05047	153.912	3.05e-14	6.79e-13
Bradi1g22121	0.00433833	-0.178851	-0.730997	-1.29602	-2.26081	2.65135	53.9828	2.74e-10	1.33e-09
Bradi1g22147	0.026567	0.383621	0.299343	-0.103422	-0.391717	2.86116	9.75516	0.000116062	0.000165856
Bradi1g22170	-0.268405	-0.264968	-0.0323204	-0.322181	-0.368532	4.85004	6.80381	0.000969328	0.00121994
Bradi1g22180	-1.02622	-0.453523	-1.07337	-0.921493	-0.123776	3.28217	36.8663	6.54e-09	2.19e-08
Bradi1g22200	0.270264	0.15586	0.986568	0.969037	1.14162	3.71183	18.025	1.75e-06	3.44e-06
Bradi1g22210	0.180981	0.0917829	0.461464	0.405141	0.668284	3.74651	9.33184	0.000153027	0.000214902
Bradi1g22240	0.0862651	0.24435	0.486488	0.285904	0.114891	5.61555	10.0781	9.45e-05	0.000136825
Bradi1g22270	-0.317397	-0.598723	-0.885497	-1.76243	-2.11994	5.94021	30.2693	2.14e-07	5.05e-07
Bradi1g22280	-0.245937	-0.450431	0.0673332	-0.322545	-1.88717	2.94299	25.9679	1.08e-07	2.72e-07
Bradi1g22290	-0.0949793	-0.70135	-0.965235	-0.00396172	-0.0503411	2.90518	21.8636	4.08e-07	9.08e-07
Bradi1g22300	-0.125195	-0.119389	0.139837	0.333474	0.0816768	4.39639	9.22764	0.000164014	0.000229292
Bradi1g22361	-1.02149	-2.16003	-3.46388	-7.91307	-3.46488	1.92678	89.8808	3.45e-12	3.16e-11
Bradi1g22370	-0.683226	-0.75342	-0.904249	-3.03445	-0.975343	6.23829	214.911	1.56e-15	8.08e-14
Bradi1g22500	0.388388	1.34362	1.70604	1.47255	1.57318	3.00483	20.7916	6.25e-07	1.34e-06
Bradi1g22510	0.0572936	-0.0342973	0.318986	0.383938	0.315031	5.04316	9.14519	0.000173326	0.000241409
Bradi1g22520	0.0103596	0.003518	0.280978	0.397921	0.544483	4.86852	20.2673	7.25e-07	1.53e-06
Bradi1g22540	-0.0472562	-0.295385	-2.19184	-1.83056	-0.679662	3.26024	82.8226	7.02e-12	5.74e-11
Bradi1g22551	-0.096917	-0.174608	0.428122	1.32409	-0.836539	2.43416	41.8756	2.3e-09	8.57e-09
Bradi1g22566	-0.0907339	-0.178597	0.256382	0.0962773	0.135229	3.8546	4.48775	0.00771275	0.00873442
Bradi1g22572	0.11462	-0.00385699	0.875744	1.22257	0.566896	1.84985	9.98627	0.000100139	0.000144409
Bradi1g22590	0.198211	0.107681	0.461004	0.469926	0.784778	4.35807	12.1252	2.83e-05	4.45e-05
Bradi1g22600	0.0974426	-0.28648	0.150514	0.436738	0.582901	2.81854	6.85956	0.000926818	0.00116909
Bradi1g22607	-0.264292	-0.770038	-0.269749	0.169622	-0.00739007	3.60604	9.71238	0.000119307	0.000170251
Bradi1g22650	1.31911	2.36114	0.527612	-0.0572734	-1.01989	3.57646	79.743	1.38e-11	1e-10
Bradi1g22671	-0.251518	-0.31361	-0.32416	0.308025	0.383959	7.7012	30.4346	3.08e-08	8.75e-08
Bradi1g22680	-0.492334	-0.63776	0.400451	0.20714	-0.464757	5.1684	44.4352	1.4e-09	5.56e-09
Bradi1g22690	1.3135	0.918037	0.30603	0.796274	0.481745	5.32451	27.8962	6.73e-08	1.78e-07
Bradi1g22700	-0.187918	0.127251	-0.11864	-0.194819	-0.738013	3.18985	6.8388	0.000942403	0.00118763
Bradi1g22717	0.1004	-0.0587997	-0.301827	-0.261129	-0.11555	5.53904	7.83811	0.000435815	0.000572902
Bradi1g22730	-0.246454	-0.945596	-1.47554	-0.942264	1.22894	2.79415	41.1176	3.2e-09	1.15e-08
Bradi1g22757	0.320671	-0.123273	0.968749	1.03003	0.0738068	2.18199	7.14692	0.000768987	0.000978289
Bradi1g22770	-0.517463	-0.750967	-0.490729	-0.946968	-0.719874	5.43494	20.4935	6.67e-07	1.42e-06
Bradi1g22800	-0.390967	-0.316472	-0.448894	-0.909149	-0.767301	5.48729	14.321	9.44e-06	1.62e-05
Bradi1g22830	1.10885	0.90268	0.316159	0.318969	-0.966708	3.7795	17.1785	5.36e-06	9.59e-06
Bradi1g22850	0.186865	0.61115	0.818674	0.763422	0.0540584	6.75681	63.9727	6.48e-11	3.79e-10
Bradi1g22870	-0.0157905	0.0722558	-0.220719	1.05696	0.711862	3.74992	30.737	2.85e-08	8.17e-08
Bradi1g22880	-0.244838	-1.37958	-5.80097	-7.87752	-5.13355	4.43803	305.396	4.79e-16	3.5e-14
Bradi1g22890	0.264061	-0.0725591	-1.35039	-1.19629	1.95715	2.29451	62.235	8.2e-11	4.64e-10
Bradi1g22920	-0.511748	-1.03815	-0.860958	-0.592932	-0.654373	5.69861	19.8532	8.46e-07	1.77e-06
Bradi1g22930	0.686612	0.0250227	0.403577	1.30423	1.23951	3.51621	26.2917	9.82e-08	2.5e-07
Bradi1g22980	0.530029	0.0521683	-0.769308	-0.922122	-0.534367	4.75757	47.5491	7.98e-10	3.38e-09
Bradi1g23000	0.460868	0.422508	0.161928	0.168414	0.37075	4.9368	10.5816	6.92e-05	0.000102397
Bradi1g23010	-0.316447	-1.22266	-1.67491	-1.86754	-1.07139	5.33585	41.6275	7.09e-09	2.36e-08
Bradi1g23050	0.197036	0.277512	-0.239085	-0.0241516	0.684624	4.53554	24.963	1.47e-07	3.61e-07
Bradi1g23090	0.366657	0.941379	1.32514	1.20275	-0.0609701	2.49837	43.1788	1.78e-09	6.85e-09
Bradi1g23100	0.331687	0.0596746	-0.291961	-0.4464	-0.830722	6.19907	36.979	6.38e-09	2.15e-08
Bradi1g23110	0.451472	0.240196	-1.03163	-1.45999	-0.0229122	1.84729	19.0896	1.13e-06	2.31e-06
Bradi1g23120	-0.164241	-0.802247	0.541513	1.21255	1.17483	2.46578	58.1033	1.47e-10	7.71e-10
Bradi1g23130	0.482997	0.0901769	0.179925	0.406688	-0.58743	6.13029	24.4905	1.71e-07	4.13e-07
Bradi1g23150	0.225736	0.400741	1.18579	1.4228	0.710344	2.30317	20.8286	5.9e-07	1.27e-06
Bradi1g23160	-0.229915	-0.334689	-0.328115	-0.353678	-0.361479	7.06757	7.64938	0.00050177	0.000652673
Bradi1g23192	-0.116885	-0.444799	-1.80681	-1.90251	-1.98386	5.87575	107.199	1.02e-12	1.13e-11
Bradi1g23250	0.17458	0.0661135	0.103771	-0.407702	-0.0149865	7.12482	17.9937	1.76e-06	3.45e-06
Bradi1g23257	-0.216276	-0.63328	-0.780477	-0.633845	-0.356179	6.72645	22.863	2.9e-07	6.65e-07
Bradi1g23270	-0.495555	-0.526586	-0.790388	-1.3653	0.0511098	4.722	36.4119	7.24e-09	2.4e-08
Bradi1g23280	0.00953661	0.29561	-0.0381983	-0.377102	-0.0486101	6.73598	22.6565	3.11e-07	7.08e-07
Bradi1g23320	0.0456157	-0.306912	-1.09194	-0.820692	-1.16607	2.38366	10.2191	8.78e-05	0.000127721
Bradi1g23330	0.231141	0.0081145	-0.0312193	0.154433	0.603497	3.12023	7.78829	0.00045224	0.000592702
Bradi1g23340	0.835632	0.455011	0.739452	1.05358	1.26705	5.8553	36.1947	7.6e-09	2.51e-08
Bradi1g23350	-0.984219	-1.21558	-1.58856	-1.79259	-2.22442	7.10017	77.0474	1.65e-11	1.17e-10
Bradi1g23400	-0.236429	-0.558309	0.224486	0.521903	0.207416	5.18222	31.6185	2.27e-08	6.68e-08
Bradi1g23410	-0.444275	-0.617352	-0.844442	-1.1239	-1.04286	4.03135	23.2964	2.51e-07	5.85e-07
Bradi1g23440	0.549984	1.37168	0.0679952	0.0547166	-0.919174	4.61146	90.3469	3.3e-12	3.04e-11
Bradi1g23450	0.774621	1.28347	0.108105	-0.390116	-1.0119	7.83371	93.4081	2.47e-12	2.37e-11
Bradi1g23470	-0.494131	-0.453203	0.129635	-0.00844787	-0.448728	5.52156	13.6882	1.24e-05	2.08e-05
Bradi1g23480	-0.00679793	-0.206017	-0.1889	0.297109	0.457952	4.53675	30.9377	2.7e-08	7.8e-08
Bradi1g23490	0.162875	0.10204	0.325428	0.565131	0.455854	4.32752	9.44699	0.000141824	0.000200323
Bradi1g23497	0.870841	1.08704	0.547162	0.311322	-0.343326	6.5179	82.7068	7.11e-12	5.79e-11
Bradi1g23510	0.116284	-0.0560102	-0.884657	-0.498176	1.26446	4.41031	80.6406	8.85e-12	6.94e-11
Bradi1g23516	-0.32039	-0.818381	-1.03274	-0.620003	0.204832	1.98381	14.5331	8.16e-06	1.41e-05
Bradi1g23520	0.20914	0.0952131	0.333647	0.483293	1.00917	7.19974	19.9093	8.29e-07	1.73e-06
Bradi1g23550	-0.152418	0.574592	-0.499807	-0.961748	-0.515312	2.19013	16.4748	3.34e-06	6.23e-06
Bradi1g23560	-0.124896	-0.322287	-0.495845	-0.229798	0.15347	4.916	13.5446	1.33e-05	2.22e-05
Bradi1g23570	0.21211	0.44855	0.435893	0.459801	0.50405	5.15563	9.65293	0.000123983	0.000176517
Bradi1g23580	0.414688	-0.0355257	0.421529	0.67754	0.165421	4.78531	24.45	1.73e-07	4.18e-07
Bradi1g23590	-0.350805	0.111782	-0.0688455	-0.197458	-0.627681	5.22982	19.2328	1.07e-06	2.2e-06
Bradi1g23610	0.0320385	-0.393997	-0.374829	-1.2794	-1.78685	10.7912	29.7598	6.94e-08	1.83e-07
Bradi1g23620	-0.213263	-0.0236512	-0.745637	-0.702365	-0.903821	2.61714	9.85884	0.000108596	0.000155767
Bradi1g23630	0.171259	0.116728	0.597809	0.7399	0.0402865	2.73329	8.52506	0.000265433	0.000360251
Bradi1g23635	0.546318	0.586839	0.837224	0.884075	0.376825	2.80477	8.7713	0.000223588	0.000306534
Bradi1g23653	0.248992	0.239895	-0.509758	-0.568646	-1.30229	4.25535	47.2007	8.48e-10	3.57e-09
Bradi1g23675	1.05284	0.875099	-0.170201	-0.846597	-0.35961	5.98246	112.568	4.82e-13	6.12e-12
Bradi1g23691	0.608123	-0.27055	-1.16449	-1.1273	-1.80976	5.69974	77.6439	2.74e-11	1.81e-10
Bradi1g23700	1.70181	1.13534	1.02126	1.34785	0.854411	2.29964	7.61557	0.00054782	0.00070925
Bradi1g23710	0.943127	0.815944	0.732757	0.514054	-0.681602	5.28494	56.1292	1.97e-10	9.99e-10
Bradi1g23716	1.65049	0.875194	0.0409216	-0.0318767	-0.644153	4.09731	74.4038	1.77e-11	1.24e-10
Bradi1g23722	1.37715	0.737281	0.474741	0.386089	-0.398268	4.73953	91.1782	3.05e-12	2.84e-11
Bradi1g23730	1.38647	1.44643	1.21571	0.707184	-0.861379	5.58656	105.027	8.86e-13	1.01e-11
Bradi1g23746	0.159276	0.538276	0.605567	0.748205	-0.134728	3.99128	21.7499	4.25e-07	9.42e-07
Bradi1g23770	-0.153026	-0.49162	-1.1073	-1.47562	-0.846703	7.08763	113.356	4.54e-13	5.83e-12
Bradi1g23840	-0.0877867	0.357125	0.780292	0.965881	0.599842	4.4448	36.5124	7.08e-09	2.36e-08
Bradi1g23880	0.0865861	0.0868137	-0.742505	-0.99666	0.618068	3.69175	20.6328	7.31e-07	1.54e-06
Bradi1g23895	-0.105269	-0.529123	-2.01723	-1.98033	-2.67584	3.92404	77.2543	1.75e-11	1.23e-10
Bradi1g23900	-0.0954518	-0.239649	-0.68467	-1.06187	-0.520195	6.55086	52.7203	3.35e-10	1.58e-09
Bradi1g23910	0.0105609	-0.470736	-0.209659	0.395743	0.456156	2.67409	16.5198	3.27e-06	6.12e-06
Bradi1g23920	-0.47065	-1.35471	-0.81077	-1.22091	-1.63902	2.82121	36.4679	7.15e-09	2.38e-08
Bradi1g23930	0.160683	0.446994	0.0886754	-0.0385256	-0.149318	4.86657	17.7197	1.97e-06	3.83e-06
Bradi1g23980	-0.346467	-0.519751	-0.676332	-0.869005	-0.510835	5.53548	21.3514	4.89e-07	1.07e-06
Bradi1g23990	-0.0850305	0.0990877	-1.39818	-2.809	-2.20987	3.61544	62.1189	1.73e-10	8.87e-10
Bradi1g24010	-0.17548	-0.470147	-0.910385	-2.04173	-1.37274	2.02801	19.3127	1.04e-06	2.14e-06
Bradi1g24030	-0.0545183	-0.165808	0.102304	0.29747	0.198069	5.28769	6.23861	0.00154614	0.00189419
Bradi1g24040	1.22682	1.02096	1.17692	1.19568	1.00658	4.12082	13.1326	1.81e-05	2.94e-05
Bradi1g24051	-4.21962	-2.9069	-2.33937	-2.12688	-4.89039	0.950221	8.48151	0.000685297	0.00087694
Bradi1g24060	0.0481321	-0.0402232	0.857573	1.03669	1.44012	4.51366	96.8843	1.79e-12	1.8e-11
Bradi1g24070	-0.128222	-0.236012	-0.102096	0.281536	0.3073	5.31764	24.6975	1.6e-07	3.9e-07
Bradi1g24090	-0.410062	-0.303515	-0.236991	-0.563189	-0.883166	5.11746	24.8204	1.54e-07	3.76e-07
Bradi1g24100	0.00998965	0.550163	0.493262	0.264941	0.64041	7.80712	9.99003	9.99e-05	0.000144105
Bradi1g24110	-0.151205	-0.337296	-0.938271	-1.50412	0.134118	6.55799	126.791	1.69e-13	2.62e-12
Bradi1g24121	-0.441763	-0.686479	-1.24573	-1.39038	-0.700507	3.23454	24.7011	1.6e-07	3.89e-07
Bradi1g24130	0.0627399	0.0345757	0.0422317	0.438238	0.510894	6.66279	14.3865	8.76e-06	1.51e-05
Bradi1g24140	1.10321	0.757588	-0.166697	-0.600282	-0.975919	4.081	121.407	2.48e-13	3.6e-12
Bradi1g24147	-0.212305	-0.335801	-0.703091	-1.46936	-0.363681	3.87253	12.8017	2.57e-05	4.07e-05
Bradi1g24170	0.863894	0.192842	1.2999	0.728068	-0.769168	2.7377	50.5104	4.81e-10	2.17e-09
Bradi1g24200	0.46912	0.036407	-1.46728	-1.4717	-0.749646	4.85442	98.0632	1.61e-12	1.66e-11
Bradi1g24210	-0.207143	-0.239259	0.0321867	0.506569	0.455334	4.81317	24.0732	1.95e-07	4.66e-07
Bradi1g24220	-0.303736	-0.380017	-1.14442	-1.71709	0.974082	5.25673	116.22	3.65e-13	4.94e-12
Bradi1g24240	0.989697	0.281347	-1.08151	-1.34035	-2.09773	6.77849	208.668	2.03e-15	9.67e-14
Bradi1g24250	-0.248878	-0.436188	-1.1305	-1.13271	0.555786	5.13804	59.8198	1.15e-10	6.22e-10
Bradi1g24260	-0.0721241	-0.141772	0.0583598	0.216503	-0.304741	5.51185	8.48032	0.00027393	0.000371158
Bradi1g24270	0.847499	1.03546	-0.154861	-0.322184	-0.738855	6.17183	89.526	3.57e-12	3.25e-11
Bradi1g24277	0.212251	0.576525	0.416473	0.382636	0.23554	4.7155	7.03226	0.000807675	0.00102507
Bradi1g24287	0.520589	0.816338	1.12008	1.22508	1.34555	2.34499	11.6261	3.74e-05	5.78e-05
Bradi1g24297	0.0900918	-0.16704	-0.0454262	0.374076	0.288447	3.83713	7.84755	0.000432777	0.000569094
Bradi1g24310	-0.926721	-1.17514	-1.12717	-1.20515	-0.980222	4.95997	29.1833	4.47e-08	1.23e-07
Bradi1g24315	-0.161372	-0.114255	0.314492	0.664622	0.224714	2.42791	6.40109	0.00134877	0.00166405
Bradi1g24320	-0.0744307	-0.368439	-0.624318	-0.62285	0.504549	4.40021	27.07	7.81e-08	2.03e-07
Bradi1g24330	-0.0802131	0.214061	-0.0820382	-0.547272	-0.887464	6.12265	54.1577	2.67e-10	1.3e-09
Bradi1g24340	-0.12706	-0.254833	-0.701778	-2.24889	-0.712437	7.19699	45.377	2.85e-09	1.04e-08
Bradi1g24347	-0.138143	-0.567664	-1.01598	-1.02516	-0.905745	3.07183	14.4197	8.62e-06	1.49e-05
Bradi1g24360	0.0892946	0.426634	0.0734764	-0.137644	-0.15737	3.53063	11.811	3.37e-05	5.23e-05
Bradi1g24390	-0.351758	0.213122	0.538179	0.0842669	-0.535429	2.04536	8.30648	0.000309921	0.000416523
Bradi1g24400	0.479994	0.475836	0.372332	0.395378	-0.0767635	5.01213	16.6433	3.1e-06	5.82e-06
Bradi1g24410	0.240875	0.29417	0.381281	-0.368125	-1.04403	3.85155	22.6631	3.1e-07	7.07e-07
Bradi1g24457	0.218835	0.534635	0.560233	0.430898	0.3483	5.99563	13.1053	1.67e-05	2.73e-05
Bradi1g24463	-0.478134	-0.0389152	0.115486	0.139474	-0.449913	4.78905	8.66536	0.000240674	0.000328531
Bradi1g24490	0.344353	0.433361	-0.196282	-0.271091	0.0757271	3.44635	6.12537	0.0017025	0.00207394
Bradi1g24500	0.121837	-0.10441	-0.493802	-1.96034	0.0911938	5.22694	79.5221	9.98e-12	7.66e-11
Bradi1g24547	-0.173834	-0.142466	0.00656309	0.036216	0.216082	7.54046	6.54572	0.00119631	0.0014854
Bradi1g24567	0.197084	-0.388822	-0.266219	0.0955929	0.953139	6.20509	57.0762	1.71e-10	8.81e-10
Bradi1g24580	-0.011893	-0.0606787	-0.041904	0.195074	0.547703	2.96689	6.47463	0.00126873	0.00157071
Bradi1g24590	-0.626412	-1.35001	-1.69824	-1.97164	-0.354256	4.87179	127.411	1.62e-13	2.54e-12
Bradi1g24597	-0.0311251	0.221779	0.266984	-0.0302943	-0.0340271	6.89744	5.71152	0.00244135	0.00291874
Bradi1g24610	-0.0975554	-0.121989	-0.322784	-0.772049	-0.71619	4.98133	33.031	1.6e-08	4.87e-08
Bradi1g24630	0.247595	0.324002	0.307817	0.188294	0.299114	5.06786	5.08312	0.00433455	0.00504283
Bradi1g24667	-0.505548	-0.0804532	0.781008	1.70569	0.524768	4.57999	168.151	1.39e-14	3.85e-13
Bradi1g24680	-0.0757356	0.163132	0.137858	0.369721	-0.388232	8.06345	31.265	2.48e-08	7.24e-08
Bradi1g24690	-0.0489329	0.00357485	0.460373	0.873184	1.23182	4.19786	56.4293	1.89e-10	9.59e-10
Bradi1g24700	0.381756	0.259401	0.473346	0.725819	0.915673	3.9591	15.2916	5.69e-06	1.02e-05
Bradi1g24720	0.653208	0.803921	1.0702	0.992976	1.34139	5.19565	20.4859	7.71e-07	1.62e-06
Bradi1g24747	-0.433562	-1.20432	-1.06002	-1.32146	-0.0924127	5.5498	47.7968	7.85e-10	3.33e-09
Bradi1g24760	-0.251516	-0.769904	-1.15587	-2.92936	-4.48159	10.8568	160.315	3.71e-14	7.9e-13
Bradi1g24770	-1.05707	-2.31949	-2.0217	-5.05371	-3.34107	3.31332	28.3005	7.23e-07	1.53e-06
Bradi1g24811	0.0281584	-0.207505	-0.277733	0.360768	0.139991	2.49114	6.12637	0.00170105	0.00207262
Bradi1g24820	1.0413	0.705488	-1.15175	-1.01602	-1.54466	5.20429	106.721	1.51e-12	1.58e-11
Bradi1g24830	-0.661499	-0.874812	-1.01693	-0.931012	-0.996759	3.82417	11.1076	5.47e-05	8.22e-05
Bradi1g24845	-2.09298	-2.29916	2.49671	3.98135	-3.23555	3.45156	50.0751	2.94e-08	8.39e-08
Bradi1g24850	-0.146094	-0.155483	-0.145821	-0.133496	-0.387501	5.28183	6.23487	0.00155104	0.00189991
Bradi1g24860	0.0313485	-0.251575	-0.689239	-0.917062	-0.0316654	9.02751	59.4917	1.2e-10	6.48e-10
Bradi1g24870	-0.276373	-0.892008	-0.896246	-1.70655	-1.5535	10.2211	46.2874	1.01e-09	4.14e-09
Bradi1g24900	-0.0144065	-0.166568	-0.883014	-1.17112	-0.399556	4.87634	48.1934	7.13e-10	3.07e-09
Bradi1g24920	1.21808	2.16165	1.14491	1.36456	-0.22817	4.54498	46.1895	2.77e-09	1.01e-08
Bradi1g24940	0.0455782	0.347653	0.19259	0.18434	0.252432	4.99363	5.86013	0.00214165	0.00257708
Bradi1g24950	0.180445	-0.0721937	0.22957	0.645697	0.780961	5.17513	29.9114	3.54e-08	9.92e-08
Bradi1g24960	-0.0771515	0.394737	1.09973	1.03821	-0.144535	7.3799	60.5106	1.04e-10	5.72e-10
Bradi1g24980	-0.0750154	-0.476889	-1.03951	-2.14665	-1.11612	10.8241	67.107	4.31e-11	2.67e-10
Bradi1g24996	0.653147	1.0118	0.662656	0.573177	0.530292	3.37976	14.6867	7.57e-06	1.32e-05
Bradi1g25017	0.455829	0.807747	0.559783	0.373621	-0.124345	2.98775	17.8739	1.84e-06	3.61e-06
Bradi1g25057	-0.34054	-0.756014	-0.169893	-0.352524	-1.00128	5.37589	26.8781	8.26e-08	2.13e-07
Bradi1g25070	-2.87412	-3.68	-4.28957	-3.30081	-2.8575	2.87142	168.983	1.33e-14	3.71e-13
Bradi1g25080	-0.35686	-0.187405	-0.036557	-0.421783	-0.479242	5.46406	8.8114	0.000217492	0.000298634
Bradi1g25090	1.04988	0.967155	0.387597	-0.24261	-0.194201	5.18555	82.5964	7.19e-12	5.84e-11
Bradi1g25107	-0.0878248	-0.640253	-1.42296	-1.06662	-1.2283	2.2206	14.1884	9.65e-06	1.65e-05
Bradi1g25117	-0.633806	-0.217015	-1.83387	-3.16411	-1.35014	4.22947	13.1793	9.01e-05	0.000130875
Bradi1g25150	-0.229495	-0.348611	-1.70785	-2.27396	0.127953	8.26065	121.882	2.4e-13	3.5e-12
Bradi1g25170	0.0306442	-0.00386569	-0.160341	0.0477814	0.265627	5.51227	8.43414	0.000283018	0.000382666
Bradi1g25180	0.206602	-0.0883966	-0.626006	-0.281823	-0.217764	5.0715	16.0214	4.08e-06	7.48e-06
Bradi1g25187	1.04159	1.2645	0.73343	0.569455	-0.678528	3.69934	19.6518	1.61e-06	3.19e-06
Bradi1g25200	-0.390944	-0.459468	-0.946036	-0.861702	-0.354983	5.70902	20.9307	5.69e-07	1.23e-06
Bradi1g25215	0.319775	0.190264	0.223504	0.133738	0.438644	6.77379	5.22568	0.00379402	0.0044419
Bradi1g25230	-0.258766	-0.638404	-0.447911	-0.0119421	0.553641	2.18313	14.0596	1.03e-05	1.75e-05
Bradi1g25240	-0.115444	-0.0446519	0.275219	0.440043	0.352482	3.89533	7.09182	0.000770594	0.000980169
Bradi1g25260	-0.290884	-0.374606	-0.236378	-0.0663206	-0.0717315	5.55232	6.69725	0.00105671	0.00132267
Bradi1g25270	-0.53319	-0.760594	-0.55447	-0.259382	0.300761	4.94422	33.4442	1.44e-08	4.44e-08
Bradi1g25293	0.0289014	0.0805269	0.0712327	0.579992	0.501727	3.47652	9.79957	0.000112796	0.000161475
Bradi1g25310	0.196216	0.18014	0.203899	0.313376	0.647157	5.53083	12.1437	2.8e-05	4.41e-05
Bradi1g25330	0.0144419	0.406405	1.41856	1.4966	0.439582	4.2615	54.9731	2.35e-10	1.16e-09
Bradi1g25340	-0.13351	0.164918	0.138432	-0.0324858	0.0775827	5.21876	5.28044	0.00360647	0.00423033
Bradi1g25350	-0.0338744	-0.673877	-1.76736	-2.48743	-2.30793	7.8254	342.413	2.39e-17	4.59e-15
Bradi1g25360	0.0600075	-0.235159	-0.776463	-0.939635	-0.121616	4.14171	51.5055	4.08e-10	1.88e-09
Bradi1g25370	-0.00923008	-1.823	-2.42768	-1.93934	-1.46077	5.63376	102.416	3.31e-12	3.05e-11
Bradi1g25380	0.0272911	-0.584598	-0.986329	-1.1461	0.978954	1.30303	21.9322	3.99e-07	8.88e-07
Bradi1g25390	-0.222482	0.0426663	0.430863	0.31415	0.00158239	8.14383	12.0005	3.03e-05	4.74e-05
Bradi1g25400	0.19526	-0.0996311	-0.372202	-0.950056	-2.00974	4.51613	50.8551	5.31e-10	2.38e-09
Bradi1g25420	0.0298006	-0.177467	0.031168	0.347892	0.400309	3.59118	5.12772	0.00415683	0.00484587
Bradi1g25430	-0.133945	-0.452608	-0.156439	-0.768885	-0.675153	10.92	6.87986	0.00100323	0.00125985
Bradi1g25440	0.180185	-0.278417	-0.705628	-1.90984	-2.86716	8.54767	128.559	1.86e-13	2.81e-12
Bradi1g25447	0.3405	-0.279253	-1.60251	-2.3233	-1.38984	4.46394	55.5354	7.74e-10	3.29e-09
Bradi1g25470	-0.230099	-0.291337	-0.0338207	-0.0125607	-0.0325369	6.28723	5.04104	0.00450992	0.00523777
Bradi1g25517	0.617233	0.604325	2.08087	2.19566	1.01713	10.2797	20.9888	3.27e-06	6.12e-06
Bradi1g25530	-0.224647	-0.302045	0.343724	1.01616	0.391679	8.66717	22.7196	3.81e-07	8.53e-07
Bradi1g25540	0.890707	0.611008	0.504667	-0.0584732	-0.851779	8.06346	142.232	6.13e-14	1.2e-12
Bradi1g25552	1.31759	0.713747	0.299684	-0.303075	-2.10006	9.0071	263.482	2.52e-16	2.17e-14
Bradi1g25564	0.57846	0.418843	0.51801	0.366314	-0.89269	4.57358	41.4907	2.48e-09	9.16e-09
Bradi1g25588	0.944699	1.33783	1.94611	1.76304	-0.360673	1.55474	35.1656	9.62e-09	3.1e-08
Bradi1g25600	1.01041	0.892478	1.16946	0.896225	-1.21777	6.86862	140.816	6.7e-14	1.28e-12
Bradi1g25647	0.907291	1.18084	0.673959	0.139149	0.0669321	5.29872	81.8341	7.79e-12	6.25e-11
Bradi1g25657	0.444458	0.41687	-0.809851	-1.43869	-1.42774	4.65489	156.658	2.61e-14	6.07e-13
Bradi1g25670	0.841238	1.25779	1.86212	1.34548	-0.104802	2.84956	56.9367	1.75e-10	8.96e-10
Bradi1g25693	0.103711	0.0497944	-0.0499341	-0.279359	-0.459131	4.15518	5.40295	0.00322282	0.00380554
Bradi1g25697	0.840385	0.808222	-0.174211	-0.332873	-0.991145	5.39891	102.984	1.05e-12	1.17e-11
Bradi1g25712	0.0542352	0.297785	0.543055	0.962978	0.288096	4.44413	24.6874	1.6e-07	3.91e-07
Bradi1g25727	0.37978	0.932339	1.43406	1.294	0.118278	5.55841	68.4731	3.62e-11	2.29e-10
Bradi1g25737	-0.268932	1.17457	2.13527	2.11833	1.51289	4.50659	169.221	1.31e-14	3.68e-13
Bradi1g25760	0.620235	1.4469	1.4021	1.24194	0.516289	4.23786	22.8001	3.65e-07	8.19e-07
Bradi1g25790	-0.0203717	-0.0513687	0.21265	0.460104	0.241226	6.50959	21.4493	4.72e-07	1.04e-06
Bradi1g25800	-0.119447	-0.14936	-0.950372	-1.4327	-0.478134	3.55707	18.9531	1.26e-06	2.55e-06
Bradi1g25810	-0.0751457	-0.00194039	-0.0249163	-0.176578	0.471607	4.90583	9.67685	0.000122078	0.000174032
Bradi1g25816	0.634879	0.613656	0.40936	0.0853407	0.169739	5.48605	11.8368	3.32e-05	5.16e-05
Bradi1g25822	-0.152343	-0.318226	-0.307393	-0.409319	-0.170757	4.81151	4.40047	0.00841626	0.00948708
Bradi1g25830	0.0952848	0.0824632	-0.144668	0.0729856	0.435573	3.5424	7.3916	0.00061038	0.000785757
Bradi1g25837	-0.0893476	-0.435924	-1.07597	-0.747708	-0.406666	8.06927	44.8317	1.3e-09	5.2e-09
Bradi1g25860	0.531922	0.259753	0.352728	0.775276	2.29169	10.0475	157.03	2.55e-14	6e-13
Bradi1g25913	-0.390126	-0.445741	-0.788075	-0.760187	-0.0416873	2.47994	8.92999	0.000200515	0.000276811
Bradi1g25977	-0.0730908	0.075739	0.247973	-0.124478	-0.292396	6.35917	12.1679	2.76e-05	4.35e-05
Bradi1g25990	-0.502462	-0.415493	-0.650636	-1.65632	-2.01821	3.52069	38.5563	4.53e-09	1.58e-08
Bradi1g26000	0.493354	0.387598	-2.2196	-3.81953	-0.737861	8.3667	68.513	1e-09	4.14e-09
Bradi1g26020	0.310752	-0.332109	-1.28215	-2.26957	-2.8612	6.10585	159.318	3.98e-14	8.36e-13
Bradi1g26030	0.205625	0.098396	0.136199	0.488722	1.2825	4.69956	32.799	1.69e-08	5.13e-08
Bradi1g26040	2.01316	2.80748	3.38511	1.67353	0.717959	5.65622	94.3199	1.87e-11	1.3e-10
Bradi1g26050	-0.0260131	0.00583398	0.271083	-0.0225482	-0.253058	6.63585	8.68063	0.00023808	0.000325156
Bradi1g26060	0.640652	1.00291	0.679926	0.241838	0.286642	5.22661	32.6344	1.76e-08	5.31e-08
Bradi1g26070	-0.408173	-0.716562	-1.46347	-1.19203	1.01152	5.30449	133.885	1.05e-13	1.8e-12
Bradi1g26080	-0.761797	-0.993519	-1.23896	-1.2373	0.271038	1.83114	20.3824	6.95e-07	1.47e-06
Bradi1g26090	0.00322647	0.531717	-0.0222628	-0.504747	0.598086	2.4914	13.4103	1.43e-05	2.36e-05
Bradi1g26100	-0.0981933	-0.293173	-1.53756	-2.0686	-1.10694	2.94552	36.8563	6.56e-09	2.2e-08
Bradi1g26110	-0.268598	-0.254395	-0.0282275	0.30283	0.485699	4.21555	14.4547	8.47e-06	1.46e-05
Bradi1g26120	0.683976	0.434139	0.401054	0.232511	0.972983	2.66667	8.60452	0.000251051	0.000341683
Bradi1g26166	0.37741	0.381679	0.944532	1.18065	0.621586	2.5011	12.5358	2.26e-05	3.62e-05
Bradi1g26180	0.421034	0.724546	1.02709	0.792979	0.750937	2.66914	8.65017	0.000243181	0.000331757
Bradi1g26190	-0.548946	-0.461237	0.0335909	-0.0509382	-0.844076	5.18512	26.3118	9.76e-08	2.48e-07
Bradi1g26197	0.0538945	0.0413193	0.247175	0.376243	-0.0127932	4.79213	5.0991	0.00426995	0.00497199
Bradi1g26210	-0.0414117	-0.0727345	0.0131128	0.486871	0.48336	5.94028	22.9383	2.83e-07	6.5e-07
Bradi1g26240	-0.288306	-0.745333	-2.07397	-2.16242	-0.36202	3.57164	71.9104	2.38e-11	1.6e-10
Bradi1g26260	0.115965	-1.13017	-2.3269	-2.64416	-2.12368	6.06537	281.893	1.37e-16	1.43e-14
Bradi1g26277	-0.0407425	-0.144998	-0.318922	-0.273348	0.166365	6.65908	6.51718	0.00122482	0.00151916
Bradi1g26287	0.918113	1.01143	0.361011	-0.667862	-0.962344	5.24776	160.257	2.13e-14	5.28e-13
Bradi1g26300	0.0107677	0.0266461	-0.0210361	0.350361	0.266626	6.26989	7.18488	0.00071637	0.000914594
Bradi1g26310	0.0155489	-0.100487	-0.502957	-0.488526	-0.443129	7.39185	23.5269	2.33e-07	5.45e-07
Bradi1g26317	0.273499	0.365598	0.444489	0.966691	0.732853	3.62768	11.9095	3.19e-05	4.97e-05
Bradi1g26330	-0.438221	-0.335949	-0.0272616	0.960449	1.44225	1.57619	23.2036	2.59e-07	6.01e-07
Bradi1g26337	0.360139	0.350889	0.794717	1.09846	0.879689	4.92026	24.9131	1.49e-07	3.66e-07
Bradi1g26350	-0.0196152	-0.519995	-1.29638	-2.31291	-0.322338	10.023	138.852	7.59e-14	1.4e-12
Bradi1g26403	0.708847	0.702103	0.934012	1.26954	0.617534	4.9998	5.28732	0.00566624	0.00650514
Bradi1g26420	0.60237	0.696346	0.386882	0.327851	0.45033	7.04302	15.9099	4.29e-06	7.84e-06
Bradi1g26430	0.452391	1.52421	2.31079	1.50467	1.2289	1.73141	15.0739	6.3e-06	1.12e-05
Bradi1g26440	0.146119	0.452666	0.73505	0.562549	0.419725	2.74961	4.371	0.0086695	0.00976104
Bradi1g26457	0.283666	0.209705	0.446517	0.543914	0.202136	4.54741	8.93144	0.000200316	0.00027656
Bradi1g26510	-0.342298	-0.880874	-0.784044	-0.712144	-0.148558	3.69151	24.7662	1.57e-07	3.82e-07
Bradi1g26520	-0.214708	-0.404582	-1.68384	-1.48505	0.581833	4.70199	121.606	2.45e-13	3.55e-12
Bradi1g26530	-0.677825	-0.666494	-1.9026	-3.08991	-0.594214	6.0749	24.161	2.41e-06	4.62e-06
Bradi1g26540	-0.283507	-0.685018	-2.16961	-2.72902	-0.193753	6.6478	143.376	7.15e-14	1.35e-12
Bradi1g26560	0.145309	-0.0751673	0.354701	0.689316	0.810062	4.00407	30.5791	2.97e-08	8.47e-08
Bradi1g26570	-0.244195	-0.163674	-0.945475	-0.779792	0.298842	4.41284	20.5665	7.04e-07	1.49e-06
Bradi1g26600	-0.115806	-0.142449	0.25216	1.06317	0.728295	4.4643	41.2375	2.61e-09	9.59e-09
Bradi1g26603	-0.160513	-0.215654	-0.00731156	0.628769	0.29736	3.13014	8.7587	0.000225542	0.000309002
Bradi1g26607	0.191078	0.223116	0.474854	0.702224	0.727493	4.96947	16.7537	2.96e-06	5.58e-06
Bradi1g26670	0.00277437	-0.0313651	-0.315243	-0.614084	-0.379947	4.62857	16.9525	2.71e-06	5.15e-06
Bradi1g26690	0.595361	1.75847	1.60905	1.05031	0.236507	6.84343	126.753	1.7e-13	2.62e-12
Bradi1g26700	-0.744732	-0.685118	-0.70423	-0.403739	-0.605516	5.42974	14.823	7.1e-06	1.24e-05
Bradi1g26710	0.126318	0.0999916	-0.366198	-0.624327	0.771899	5.24369	13.8357	2.43e-05	3.86e-05
Bradi1g26750	0.513143	0.533246	0.974368	1.50895	1.04922	1.87193	13.3759	1.45e-05	2.4e-05
Bradi1g26760	-0.20085	-0.476349	-0.831289	-1.67096	-0.7388	4.47447	59.3764	1.22e-10	6.56e-10
Bradi1g26765	0.477353	0.138653	0.176226	0.0384076	-0.690787	7.90822	22.3911	3.4e-07	7.7e-07
Bradi1g26775	0.242926	0.686446	0.643696	0.403841	0.77016	3.21839	9.14212	0.000173684	0.000241845
Bradi1g26790	0.192449	-0.071086	-0.162768	-0.108949	0.891049	1.77832	9.53265	0.000134079	0.000190101
Bradi1g26810	-0.122624	-0.0760914	-1.19431	-1.62573	-0.350753	4.76606	74.9572	1.66e-11	1.18e-10
Bradi1g26820	0.186023	0.128802	0.210522	-0.085764	0.174465	6.36163	6.22574	0.00156308	0.00191422
Bradi1g26830	0.0157283	-0.198231	-0.44347	-0.457421	0.22301	2.94231	5.82777	0.00220326	0.00264727
Bradi1g26850	-0.0206736	0.0492595	1.27297	1.74589	1.92263	7.15707	42.7304	1.44e-08	4.43e-08
Bradi1g26857	0.492743	-0.780623	-0.287333	0.111957	-0.101198	2.58256	14.2217	9.49e-06	1.62e-05
Bradi1g26880	-0.30845	-0.868588	-0.730759	-1.64809	-0.490154	6.15838	27.6597	1.27e-07	3.15e-07
Bradi1g26912	-0.0384935	-0.159291	-0.193288	-0.297045	-0.334526	5.82857	6.07328	0.00178021	0.00216449
Bradi1g26940	0.371585	0.310876	0.3844	0.463097	0.795713	5.61123	10.6271	6.73e-05	9.98e-05
Bradi1g26960	0.03622	-0.0514161	0.427961	0.328012	0.725444	3.99846	15.7777	4.56e-06	8.28e-06
Bradi1g26980	0.597688	0.641469	0.954349	0.884157	1.03136	2.32282	6.47614	0.00126713	0.00156886
Bradi1g26990	0.352268	1.01663	2.00822	0.980013	-0.697638	3.75358	59.3012	1.45e-10	7.6e-10
Bradi1g27000	0.539765	0.759304	0.452774	-0.239854	-0.496019	6.33895	88.7242	3.86e-12	3.47e-11
Bradi1g27010	0.0468514	0.434701	0.289015	-0.427396	-0.851507	7.32185	89.5475	3.56e-12	3.25e-11
Bradi1g27027	0.215823	0.355787	0.485233	0.455745	0.654616	6.2905	14.037	1.04e-05	1.77e-05
Bradi1g27040	-0.12092	-0.106081	-0.00141077	-0.270666	-0.264571	7.2102	4.96383	0.00485232	0.00561356
Bradi1g27050	-0.047545	-0.00314889	0.412333	0.890348	0.372646	6.70344	40.2696	3.17e-09	1.14e-08
Bradi1g27060	-0.034304	-0.215438	-0.458989	-0.00491955	0.91773	5.67625	118.198	3.14e-13	4.37e-12
Bradi1g27080	0.0385676	0.0305859	0.0938632	0.36305	0.33347	6.00107	16.6821	3.05e-06	5.73e-06
Bradi1g27120	0.304988	-0.194974	0.0838128	0.505809	1.19272	2.22231	19.1763	1.1e-06	2.24e-06
Bradi1g27130	-0.276759	-1.12001	-1.79784	-2.30221	-0.26395	2.83283	76.8734	1.34e-11	9.84e-11
Bradi1g27140	0.0204156	-0.328802	-0.923705	-1.08014	0.664914	4.52016	87.4709	4.37e-12	3.84e-11
Bradi1g27153	-0.0664538	-0.00263414	0.0395612	-1.15013	-1.56571	4.02732	47.0794	8.67e-10	3.64e-09
Bradi1g27157	0.00402257	-0.116483	-0.285537	-0.783333	-0.912697	5.41222	32.209	1.96e-08	5.84e-08
Bradi1g27170	0.142292	0.104597	0.440931	0.527915	0.453628	6.98979	22.3481	3.46e-07	7.8e-07
Bradi1g27191	0.529132	0.325458	-0.271313	-0.372864	0.933917	3.94294	21.4911	4.76e-07	1.05e-06
Bradi1g27197	-0.234635	-0.905183	-1.88469	-1.55432	0.438194	3.66623	133.527	1.07e-13	1.83e-12
Bradi1g27210	0.049503	0.220018	0.470916	0.509484	-0.019535	4.77455	13.1562	1.63e-05	2.67e-05
Bradi1g27230	0.279367	-0.00936472	-0.248488	0.0816667	0.00029074	5.0471	9.30661	0.000155611	0.000218283
Bradi1g27237	0.246132	0.695183	0.720002	0.253909	0.146395	4.88259	16.1265	3.9e-06	7.16e-06
Bradi1g27280	-0.324487	-0.809174	-1.51441	-1.82177	0.146511	6.96852	132.531	1.15e-13	1.93e-12
Bradi1g27290	-0.493838	-0.90596	-1.29577	-0.841095	-1.06595	3.34282	11.8021	3.66e-05	5.65e-05
Bradi1g27300	0.420667	0.483792	0.73812	1.25562	1.60848	1.68196	9.42039	0.000144329	0.000203612
Bradi1g27310	-0.0762865	-0.0416946	0.318502	0.506147	0.282238	5.19211	17.6792	2e-06	3.89e-06
Bradi1g27320	-0.42395	-1.06253	-0.771916	0.023402	0.917197	1.60506	24.2722	1.83e-07	4.4e-07
Bradi1g27357	0.0230126	-0.0582832	0.659886	1.19668	0.677887	4.96026	76.214	1.44e-11	1.05e-10
Bradi1g27370	-0.291566	-0.96567	-1.12761	-0.481838	-0.804575	4.94278	20.7846	6.51e-07	1.39e-06
Bradi1g27377	-0.0686726	-0.98038	-0.926004	-0.686114	-0.207617	3.56329	24.1889	1.88e-07	4.51e-07
Bradi1g27394	0.0734959	0.16036	0.163674	0.597002	0.386718	3.76234	6.86986	0.000919196	0.00115984
Bradi1g27400	0.178168	0.314166	0.394598	0.477191	0.40488	4.76849	7.89605	0.000417536	0.000550762
Bradi1g27405	-0.129875	-0.0133102	0.217453	0.290589	-0.0324085	3.61163	6.29295	0.00147679	0.00181435
Bradi1g27450	0.0828128	-0.172735	-0.579855	-0.655423	0.309828	6.04544	51.7539	3.92e-10	1.81e-09
Bradi1g27460	-0.13469	-0.120703	0.266851	0.641101	0.132787	6.05446	49.7134	5.49e-10	2.45e-09
Bradi1g27490	0.0928808	0.315507	0.139081	-0.0867877	-0.20557	5.37748	9.83966	0.000109936	0.000157606
Bradi1g27503	-0.44473	0.0233794	0.029017	0.652328	-0.5858	1.89384	10.4033	7.72e-05	0.00011326
Bradi1g27529	0.216553	0.169112	0.614631	0.144519	0.515285	2.51819	5.8375	0.00218454	0.00262614
Bradi1g27710	0.0733978	0.297989	0.198768	0.0602035	0.0176226	5.80166	5.83355	0.00219212	0.00263467
Bradi1g27730	0.470194	1.02212	1.01314	1.12866	1.15627	2.45805	16.6967	3.03e-06	5.7e-06
Bradi1g27740	0.193352	0.0678399	-0.441327	-0.445055	0.314194	7.07684	21.7992	4.18e-07	9.27e-07
Bradi1g27745	-0.400807	-0.447871	-0.197449	-0.261128	0.0834265	2.75067	4.52328	0.007445	0.00844546
Bradi1g27757	0.976832	1.81826	1.08829	-2.02e-05	0.0752548	1.99731	45.0605	1.25e-09	5.01e-09
Bradi1g27780	0.0428823	0.306561	0.00618793	0.361485	0.082884	4.4515	5.27042	0.00364	0.00426779
Bradi1g27790	-0.142617	-0.260519	-0.0894464	0.257323	0.465223	3.6944	10.5385	7.1e-05	0.0001049
Bradi1g27807	-0.137037	-0.366856	-0.232077	0.0444354	0.277488	3.4424	8.75228	0.000226545	0.000310271
Bradi1g27880	-0.249785	-0.31118	-0.128389	0.109501	0.382065	4.38346	12.9621	1.8e-05	2.93e-05
Bradi1g27947	0.992328	1.10145	0.741637	0.78319	-1.2547	5.85141	128.076	1.55e-13	2.45e-12
Bradi1g27980	-0.344998	-0.389832	-0.248942	-0.534833	-0.659087	3.78272	8.86093	0.000210215	0.00028921
Bradi1g27990	0.00363374	0.0379415	-0.110012	-0.366358	-0.470384	5.15577	18.233	1.59e-06	3.16e-06
Bradi1g28000	-0.0657997	-0.146347	-0.0618212	0.333173	0.700938	7.15633	31.7113	2.22e-08	6.54e-08
Bradi1g28010	-0.444503	-0.49485	-0.412039	-0.389689	-0.408151	5.59998	5.99702	0.00190116	0.00230302
Bradi1g28055	-0.528428	-0.800051	-0.334086	-0.0366855	0.180098	2.72228	10.2449	8.51e-05	0.000124178
Bradi1g28080	-0.053006	-0.00486024	0.367745	0.557237	0.283604	5.71236	25.4398	1.27e-07	3.15e-07
Bradi1g28090	0.137509	-0.199026	0.905678	0.945057	0.655891	9.03595	57.155	1.69e-10	8.72e-10
Bradi1g28130	0.584879	0.360076	1.67519	0.725715	2.10079	2.58368	25.9145	1.21e-07	3.01e-07
Bradi1g28140	-0.686304	-1.32839	-1.94115	-2.86382	0.134338	5.46598	168.974	1.33e-14	3.71e-13
Bradi1g28160	-0.662744	-1.2793	-1.38113	-1.38957	0.0420428	4.02522	48.8836	6.33e-10	2.77e-09
Bradi1g28167	0.0782977	0.390326	-0.056786	-0.406834	-0.278271	4.7407	16.0891	3.96e-06	7.28e-06
Bradi1g28190	0.176771	0.55778	0.0213683	-0.44206	-0.853817	5.45402	72.3639	2.25e-11	1.53e-10
Bradi1g28194	0.124692	0.544346	0.73945	1.39847	0.631313	1.76253	17.7881	1.91e-06	3.73e-06
Bradi1g28196	-0.427224	-0.552544	-1.14089	-0.872647	1.23393	2.44309	48.2276	7.08e-10	3.06e-09
Bradi1g28205	-0.240059	0.211529	0.097218	0.0266947	0.258364	4.99054	7.64107	0.000504918	0.000656398
Bradi1g28267	0.158199	0.139426	0.426452	0.374181	0.667629	2.20056	5.53274	0.00286477	0.00340072
Bradi1g28280	0.539206	0.598534	0.512581	0.311427	0.0487544	6.43344	21.555	4.55e-07	1e-06
Bradi1g28300	-0.339037	-0.124494	0.0985805	0.124317	-0.255137	4.15225	7.44121	0.000587606	0.000757652
Bradi1g28310	0.0975902	-0.31171	-0.757726	-2.17078	-0.873994	6.07788	165.344	1.61e-14	4.32e-13
Bradi1g28320	1.18173	0.94755	0.433879	-0.151793	1.09797	2.33956	16.8976	2.78e-06	5.26e-06
Bradi1g28326	-1.40662	-1.13516	0.514302	0.956553	-0.66091	1.69306	25.1546	1.39e-07	3.42e-07
Bradi1g28330	-0.248987	-0.609555	-1.19753	-1.96265	-0.625633	7.70471	74.7393	1.71e-11	1.2e-10
Bradi1g28366	-0.0221388	0.0607871	-0.259134	0.263867	1.23177	2.20741	20.5657	6.49e-07	1.39e-06
Bradi1g28380	-0.0851084	-0.525466	-0.762426	-0.541617	-1.02099	3.5056	26.2894	9.82e-08	2.5e-07
Bradi1g28390	-0.300897	-0.621115	-0.722289	-0.752666	-0.956079	5.5966	35.8484	8.22e-09	2.69e-08
Bradi1g28400	-0.406578	-0.31315	-0.0221126	0.0260278	-0.135225	4.31965	7.20216	0.00070677	0.000902911
Bradi1g28410	-0.92893	-0.599437	-1.61356	-0.800998	0.704229	3.84792	33.2884	3.14e-08	8.88e-08
Bradi1g28416	-0.0691971	-0.235055	-0.843497	-1.3673	0.453783	5.65005	109.705	6.05e-13	7.34e-12
Bradi1g28430	-0.23921	0.106184	0.473929	0.235305	-0.121174	5.44582	20.6023	6.41e-07	1.37e-06
Bradi1g28437	-0.0371153	-0.00867301	0.34489	0.680476	0.419522	4.58159	24.2324	1.85e-07	4.45e-07
Bradi1g28490	-0.230702	-0.0661387	-1.17108	-2.0989	-2.22026	7.03641	153.399	3.14e-14	6.95e-13
Bradi1g28500	-0.180426	0.0332788	-0.212829	0.252598	0.433104	4.52531	5.99514	0.00196311	0.00237413
Bradi1g28507	0.340346	0.385685	0.565875	0.488003	0.801567	4.94076	20.1009	7.71e-07	1.62e-06
Bradi1g28525	0.0743471	-0.00957116	0.124883	0.668038	0.634974	5.36153	12.9667	1.9e-05	3.07e-05
Bradi1g28530	-0.553369	-0.707859	-0.825952	-1.08232	-1.16135	7.04795	53.1283	3.14e-10	1.49e-09
Bradi1g28550	-0.273314	0.678755	-0.0871857	0.00420081	-0.602303	4.33152	15.7912	5e-06	9.01e-06
Bradi1g28580	-0.221137	-0.692247	-0.96338	-1.33796	-0.0685426	4.20613	47.102	8.63e-10	3.63e-09
Bradi1g28600	-0.0465389	-0.240943	-0.123619	0.085957	1.04313	4.36152	74.9458	1.67e-11	1.18e-10
Bradi1g28610	0.187431	0.5777	0.416825	0.185358	0.180775	3.2617	5.32886	0.00344913	0.00405611
Bradi1g28620	0.46176	-0.537341	-0.894374	-0.735502	0.475555	5.462	19.5337	3.12e-06	5.86e-06
Bradi1g28627	0.429788	0.316126	0.479468	0.527655	0.499116	4.52337	6.79852	0.00097347	0.00122496
Bradi1g28637	0.0511413	-0.0924847	-0.169492	-0.430496	0.015921	3.87349	4.68966	0.00632008	0.00722333
Bradi1g28650	0.043438	0.11733	0.282666	0.677357	0.492567	4.58619	24.5708	1.66e-07	4.04e-07
Bradi1g28660	0.07796	0.0932631	0.0127305	0.634745	0.49342	4.61546	16.5346	3.25e-06	6.08e-06
Bradi1g28680	-0.19333	-0.122612	0.219452	0.475639	0.0118721	4.73768	13.9874	1.07e-05	1.81e-05
Bradi1g28700	-0.377939	-0.666718	0.0971585	0.289246	0.932024	4.58147	60.7886	1e-10	5.54e-10
Bradi1g28710	-0.0332027	0.0820322	0.341303	0.458517	0.080171	3.90965	5.72765	0.00240668	0.00288071
Bradi1g28750	-0.244092	-0.301278	-0.290173	-0.695017	-0.433201	6.21082	7.66115	0.000502639	0.000653646
Bradi1g28760	-0.575573	-0.84681	-1.01886	-1.27698	-0.678564	8.94408	44.055	1.51e-09	5.92e-09
Bradi1g28770	-0.119197	-0.196866	-0.231899	-0.374954	-0.427365	6.80444	8.14847	0.000347217	0.000463215
Bradi1g28790	0.174086	0.0996628	-0.00441226	0.220976	0.379834	6.54369	7.44614	0.000585395	0.000754922
Bradi1g28816	-0.0637389	0.347686	0.0778547	-0.155865	-0.734867	5.41612	32.8963	1.65e-08	5.02e-08
Bradi1g28820	0.271221	0.306679	0.134915	0.264534	-0.108879	6.11623	11.502	4.02e-05	6.16e-05
Bradi1g28840	-0.0923298	-0.195748	-0.96729	-1.10526	-0.320578	5.4452	46.3909	9.8e-10	4.05e-09
Bradi1g28847	0.0559074	-0.187578	0.21304	0.640932	0.796295	4.78575	33.598	1.39e-08	4.3e-08
Bradi1g28860	-0.304989	-0.645944	-0.837767	-1.40197	0.144303	2.26145	9.39576	0.000152738	0.000214585
Bradi1g28870	-0.213053	-0.722635	-1.16601	-0.953245	1.35846	4.26597	198.797	3.13e-15	1.32e-13
Bradi1g28920	0.0380411	0.0179771	0.0262377	0.216192	-0.153674	5.22797	5.10408	0.00425003	0.00494986
Bradi1g28950	0.218296	0.332552	0.407775	0.753966	0.783396	6.483	15.6595	4.81e-06	8.69e-06
Bradi1g28960	-0.35782	-0.959709	-1.92614	-2.30422	-0.367256	5.78413	187.124	5.37e-15	1.92e-13
Bradi1g28980	0.105983	0.131543	0.0902175	0.594697	0.629992	2.69051	6.26977	0.00150594	0.00184776
Bradi1g29000	-0.170847	-0.508746	-0.594531	-1.13838	-0.929084	10.2866	17.0036	2.85e-06	5.39e-06
Bradi1g29010	-0.437945	0.263552	0.319319	0.145534	0.252486	4.45196	14.2977	9.14e-06	1.57e-05
Bradi1g29020	0.0642348	0.0263089	0.146214	0.417984	0.56461	5.63076	14.7142	7.48e-06	1.3e-05
Bradi1g29040	-0.0386511	-0.871822	-3.03629	-4.92168	-1.0437	4.02229	182.144	6.83e-15	2.29e-13
Bradi1g29060	0.401467	0.726879	1.14329	1.37147	1.03229	4.55744	40.5106	3.02e-09	1.09e-08
Bradi1g29066	-0.687845	-0.751595	0.393613	1.32518	0.0524238	3.29549	48.587	6.66e-10	2.9e-09
Bradi1g29070	0.0648439	0.686645	3.14436	4.21994	-0.153941	3.23702	109.3	3.49e-12	3.19e-11
Bradi1g29077	0.0807133	0.271345	0.993817	1.06416	-0.26974	4.43922	54.7254	2.45e-10	1.2e-09
Bradi1g29090	-0.0547159	-0.775295	-0.871136	0.0703519	1.50105	7.40762	88.4282	5.53e-12	4.7e-11
Bradi1g29110	0.242255	0.354667	0.719729	0.536332	0.434601	4.05888	16.1787	3.81e-06	7.01e-06
Bradi1g29120	0.361108	0.327425	0.693945	0.616632	0.607041	4.16639	16.408	3.44e-06	6.4e-06
Bradi1g29130	-0.0660326	0.0652876	0.381906	0.340685	0.240348	5.19357	14.7584	7.32e-06	1.28e-05
Bradi1g29147	0.195784	0.0118994	0.42142	0.679025	0.99233	3.76176	19.5564	9.47e-07	1.96e-06
Bradi1g29167	-0.137599	0.240335	0.107518	0.413748	0.639054	4.9044	19.845	8.49e-07	1.77e-06
Bradi1g29180	-0.191259	0.0850236	0.15334	-0.00169459	0.123632	4.69505	4.98575	0.00475231	0.00550444
Bradi1g29187	-0.031113	0.0806321	0.141944	0.310166	1.30368	4.0458	68.2647	3.72e-11	2.35e-10
Bradi1g29200	0.966564	1.19771	-0.0338443	-0.211653	-0.590642	2.66892	38.7526	4.35e-09	1.52e-08
Bradi1g29210	-0.907338	-1.69439	-1.45329	-1.09181	0.123443	2.61148	34.4416	1.14e-08	3.6e-08
Bradi1g29215	-0.788097	-1.64396	-1.2805	-0.776482	0.371068	2.19692	32.6064	1.77e-08	5.35e-08
Bradi1g29220	-0.182116	-0.386746	-0.421786	-0.556696	0.111253	5.57821	19.3958	1.01e-06	2.07e-06
Bradi1g29240	-0.163216	0.0710545	-0.27236	-0.263121	-0.179427	6.81099	9.88498	0.000106799	0.00015345
Bradi1g29247	0.254533	0.234972	0.413102	0.457984	0.482827	5.55317	7.65479	0.000499733	0.000650182
Bradi1g29260	-0.346434	-1.3335	-1.311	-1.51221	-1.06616	4.29293	38.4259	4.81e-09	1.66e-08
Bradi1g29267	-0.497891	-1.39815	-2.34262	-2.46544	-1.87494	1.82167	30.6331	2.93e-08	8.37e-08
Bradi1g29287	0.400897	0.394473	0.488241	0.799694	1.13881	4.33853	20.2385	7.33e-07	1.55e-06
Bradi1g29300	-0.0725329	0.340205	0.076836	-0.734967	-0.65633	7.38743	55.9009	2.04e-10	1.03e-09
Bradi1g29321	-0.0894947	-0.114822	-0.32559	-0.484813	-0.196797	4.52604	8.39089	0.000291831	0.000393888
Bradi1g29340	1.05519	0.835765	1.1923	1.77069	1.69096	5.469	32.581	3.69e-08	1.03e-07
Bradi1g29400	0.093754	0.0387607	-0.242181	-0.246264	0.595749	4.94276	22.1817	3.66e-07	8.21e-07
Bradi1g29410	0.50734	0.529366	0.367547	0.449676	0.752628	5.31274	5.88701	0.00225125	0.0027015
Bradi1g29420	-0.0986806	0.0876103	0.0640596	-0.224488	-0.432305	3.02394	6.92775	0.000877602	0.00110961
Bradi1g29427	-0.10116	-0.131316	0.138588	0.0987698	0.476429	5.09165	11.5025	4.01e-05	6.16e-05
Bradi1g29441	0.123969	-0.0109254	0.211222	0.575151	0.538618	4.34333	16.8206	2.87e-06	5.43e-06
Bradi1g29457	0.176795	-0.519183	-1.36358	-1.59952	-1.91998	5.33606	74.928	2.82e-11	1.85e-10
Bradi1g29464	0.00516657	-0.314598	-0.196877	0.201803	0.391702	2.85175	5.90077	0.00206691	0.00249125
Bradi1g29485	0.872013	-0.00511662	-0.824585	-1.01064	-0.265944	3.55267	18.7998	2.25e-06	4.33e-06
Bradi1g29500	-0.0953213	-0.413245	-1.66158	-2.86474	-0.210753	7.38954	271.69	1.91e-16	1.78e-14
Bradi1g29510	-0.105267	-0.146198	0.341562	0.710563	0.962987	4.16499	36.3522	7.34e-09	2.43e-08
Bradi1g29520	0.126288	0.408566	0.779048	0.804993	0.776206	6.46524	16.8095	3.1e-06	5.81e-06
Bradi1g29537	0.0871333	0.458504	0.340227	0.378146	0.253147	4.19081	6.05573	0.00180729	0.00219525
Bradi1g29550	-0.19478	-0.191409	-0.100192	0.15581	0.0741176	6.30828	5.88065	0.00210354	0.00253331
Bradi1g29577	-0.414891	-0.123281	-0.305467	-0.486139	-0.730697	2.6825	5.70823	0.0024485	0.00292686
Bradi1g29590	-0.217746	-0.949694	-1.2767	-2.29823	0.684057	7.70579	144.086	5.47e-14	1.09e-12
Bradi1g29611	-0.977402	-0.544762	-0.0827	-0.738858	-2.32199	3.07241	33.0232	1.6e-08	4.88e-08
Bradi1g29622	-0.156478	0.0494835	1.29351	0.367003	0.532665	2.52173	15.5391	5.08e-06	9.14e-06
Bradi1g29658	-0.0854025	-0.168956	-0.368682	-1.28085	-0.529881	2.42335	7.72242	0.000475017	0.000620281
Bradi1g29669	0.575563	1.05379	1.11636	0.818269	0.531332	6.49212	21.0951	5.83e-07	1.26e-06
Bradi1g29680	-0.109418	0.18177	-0.191849	-3.52958	-1.59201	4.66837	232.547	7.71e-16	4.99e-14
Bradi1g29710	0.715824	0.808594	0.67908	0.520721	1.04142	3.34376	8.87048	0.000208843	0.000287493
Bradi1g29720	0.389902	0.682122	-0.0772431	-0.0193691	-0.0707101	2.20222	6.48052	0.00126255	0.00156367
Bradi1g29730	-0.11501	-0.185247	0.0408744	0.729402	-0.166509	9.46123	34.8707	1.03e-08	3.28e-08
Bradi1g29740	-0.60077	-0.493863	0.483478	0.681758	0.687438	1.8536	10.1897	8.81e-05	0.000128165
Bradi1g29776	0.568376	-0.136593	-0.771455	-0.890698	-0.578051	3.88938	51.2702	4.24e-10	1.94e-09
Bradi1g29800	0.00218593	0.328387	1.24408	2.44165	1.57418	7.545	221.033	1.21e-15	6.74e-14
Bradi1g29850	0.494067	0.404625	-0.646031	-2.09911	-0.15747	6.58887	36.341	5.43e-08	1.47e-07
Bradi1g29857	0.534483	0.151149	-0.607307	-1.52345	-2.14218	4.57192	45.2479	5.63e-09	1.91e-08
Bradi1g29900	0.0907405	-0.0751545	-0.399519	-0.88928	-0.102742	9.20129	38.783	4.32e-09	1.51e-08
Bradi1g29910	0.620893	1.16719	0.99004	0.45389	-0.594155	4.0232	64.4069	6.12e-11	3.6e-10
Bradi1g29930	-0.142388	-0.0786941	0.221482	0.424514	0.144988	5.5976	24.2196	1.86e-07	4.47e-07
Bradi1g29947	0.529037	0.25779	-0.039584	-0.0697976	0.63628	2.23633	6.45435	0.00129026	0.00159566
Bradi1g29970	-0.20569	-0.409684	-0.249652	0.0172813	-0.308068	7.65104	6.08383	0.00176417	0.00214596
Bradi1g29980	0.397565	0.153517	0.411023	0.70091	0.365239	3.32846	7.77136	0.000457976	0.00059978
Bradi1g29990	0.115218	0.0642421	0.374436	0.57923	0.512116	5.07524	20.6588	6.28e-07	1.34e-06
Bradi1g30020	-1.24918	-1.56325	2.5213	4.61964	-2.37424	1.7544	16.2764	2.85e-05	4.48e-05
Bradi1g30060	-0.474351	-0.49516	-0.357283	-0.352903	-0.661814	6.71562	9.1824	0.000169053	0.000235907
Bradi1g30110	0.720508	0.389551	0.151308	0.0274181	-0.976623	6.3305	59.4336	1.21e-10	6.53e-10
Bradi1g30113	-2.27002	-2.40002	0.182012	-0.0791419	-2.77468	5.80275	21.5683	7.47e-06	1.3e-05
Bradi1g30130	0.124533	0.51435	2.30009	0.805733	0.0808179	9.26806	144.973	5.18e-14	1.05e-12
Bradi1g30140	0.00820926	-0.109593	0.0421669	-0.300253	-0.155352	5.25166	7.05808	0.000791366	0.00100556
Bradi1g30150	0.509868	-0.166186	-0.956757	-1.12107	-1.49696	4.63348	77.7136	1.22e-11	9.09e-11
Bradi1g30160	-0.0895852	-0.129558	-0.286055	-0.164068	0.243304	4.98101	5.11874	0.00419197	0.00488472
Bradi1g30170	-0.456997	-0.642773	-0.0474511	0.341716	0.0348999	3.76147	16.3964	3.46e-06	6.43e-06
Bradi1g30180	-0.0417362	0.0208984	-0.643119	-0.411723	0.991883	3.17913	34.8658	1.03e-08	3.29e-08
Bradi1g30190	-0.169066	-0.0617351	-0.76521	-0.674692	-0.211192	3.3293	15.3302	5.59e-06	9.98e-06
Bradi1g30200	-0.069231	-0.198264	0.0438183	0.308992	0.450755	6.47671	34.3975	1.15e-08	3.63e-08
Bradi1g30220	1.03356	0.143058	-0.63104	-0.953011	-2.13275	4.12329	107.748	7.08e-13	8.39e-12
Bradi1g30230	0.917744	0.248523	-0.631094	-0.975363	-2.10689	6.12175	197.272	3.35e-15	1.4e-13
Bradi1g30240	-0.538804	-0.6247	0.261843	0.774342	-1.1581	4.74016	67.9977	3.85e-11	2.42e-10
Bradi1g30247	0.122697	0.34538	0.0835171	-0.365433	0.0425159	6.10135	20.511	6.63e-07	1.41e-06
Bradi1g30260	0.131975	0.343841	0.434114	0.39856	0.560605	5.68483	8.83805	0.000213542	0.000293411
Bradi1g30270	-0.0366138	-0.216297	-0.510071	-0.49965	-0.285963	5.67183	10.6949	6.46e-05	9.6e-05
Bradi1g30273	-0.0780556	-0.33665	-0.970453	-1.55129	-0.919712	7.01377	64.1407	6.34e-11	3.71e-10
Bradi1g30277	0.776887	0.285732	-0.0783383	0.107766	0.458864	2.5616	5.69037	0.00248764	0.00297011
Bradi1g30310	-0.205682	-0.245118	0.0227719	-0.0624399	-0.265172	5.58497	4.37158	0.00866447	0.00975662
Bradi1g30317	0.830917	0.588549	0.223158	0.106955	0.482864	3.00415	6.33353	0.00142724	0.00175588
Bradi1g30330	0.345882	0.421976	0.422177	0.840468	0.135393	7.0714	28.8764	4.68e-08	1.28e-07
Bradi1g30360	-0.217977	-0.227399	-0.0467496	-0.347587	0.386876	4.3964	21.7705	4.22e-07	9.35e-07
Bradi1g30390	-0.111182	-0.0962451	0.219249	0.182952	-0.369253	4.77641	13.6419	1.27e-05	2.12e-05
Bradi1g30400	0.256417	0.184071	-0.364236	0.0377144	-0.563285	6.5615	45.4113	1.17e-09	4.73e-09
Bradi1g30410	-0.195839	0.160196	-0.0395317	0.143405	-0.0879738	4.89734	8.72089	0.000231521	0.000316681
Bradi1g30430	0.277121	0.288114	-0.0134047	-0.216434	-0.306379	6.85382	29.2165	4.27e-08	1.18e-07
Bradi1g30440	-0.211717	-0.259587	-0.616197	-0.537394	-0.755114	5.3202	16.2859	3.63e-06	6.72e-06
Bradi1g30450	0.0018051	0.375805	-0.0294782	-0.182066	-0.751248	4.94707	44.8494	1.3e-09	5.18e-09
Bradi1g30510	-0.0608104	-0.187476	-0.991485	-1.58329	-0.590937	5.52178	98.4315	1.56e-12	1.61e-11
Bradi1g30520	-0.0816061	-0.403751	-0.374595	-0.450692	-0.265269	5.86741	7.7043	0.000481505	0.000627888
Bradi1g30527	-0.17363	-0.286178	0.0316047	0.261728	-0.12713	7.90832	15.3792	5.47e-06	9.77e-06
Bradi1g30540	-0.288673	-0.160654	0.0601773	0.040746	-0.292149	7.02767	7.7804	0.000454903	0.000595949
Bradi1g30550	-0.175398	-0.222638	0.161953	0.0935578	0.133553	8.87465	7.90689	0.000414212	0.000546645
Bradi1g30560	0.026217	0.166264	0.28134	0.38609	0.386138	4.55057	7.06301	0.000788289	0.00100189
Bradi1g30580	0.162004	0.0603664	0.107871	0.348034	0.723468	4.27537	9.9504	0.000102444	0.000147548
Bradi1g30590	0.196318	0.695958	0.40949	0.15294	-0.178344	4.05169	14.5357	8.15e-06	1.41e-05
Bradi1g30600	-0.282613	0.0900317	0.302527	0.0626833	-0.328861	6.49949	17.6972	1.98e-06	3.86e-06
Bradi1g30610	0.258898	0.294857	0.352375	0.758932	0.871856	5.09318	16.1162	3.91e-06	7.19e-06
Bradi1g30640	0.39021	2.00933	4.84666	5.15856	3.38274	2.16381	126.047	1.78e-13	2.72e-12
Bradi1g30648	-0.0478941	-0.0320393	0.0361676	0.337862	0.204921	5.11221	6.05147	0.00181392	0.00220281
Bradi1g30656	-0.116006	-0.470733	-1.11931	-1.17328	-0.709503	6.00869	77.9528	1.19e-11	8.91e-11
Bradi1g30690	-0.0547762	-0.13564	-0.516118	-0.844382	-0.348522	5.81541	26.8495	8.32e-08	2.15e-07
Bradi1g30702	0.237523	0.406762	-0.218615	-0.488071	-0.319638	3.11089	6.1032	0.00177701	0.00216076
Bradi1g30710	-0.722969	-0.524621	-0.907091	0.855601	0.668868	5.3565	60.4692	1.44e-10	7.54e-10
Bradi1g30730	-0.0934039	-0.50505	0.181588	1.04463	0.897446	7.09115	129.917	1.37e-13	2.21e-12
Bradi1g30740	-0.296445	0.506312	1.029	1.17438	0.611456	4.27889	12.8144	3.91e-05	6.02e-05
Bradi1g30750	-0.326377	-0.2982	-0.243828	0.81232	0.700362	4.5833	54.7482	2.44e-10	1.2e-09
Bradi1g30767	0.0609748	0.0110728	-0.326232	0.0649603	0.185277	3.50225	4.5837	0.00701287	0.00797324
Bradi1g30811	-0.238844	-0.51921	-1.34043	-2.64857	-0.476774	7.3988	138.352	7.83e-14	1.43e-12
Bradi1g30830	0.327813	0.28164	0.96887	1.65415	1.28097	5.59748	76.3897	1.41e-11	1.03e-10
Bradi1g30850	-1.12088	-1.73497	-0.647578	-0.550267	-1.66017	4.04432	26.1827	1.68e-07	4.07e-07
Bradi1g30870	-0.717324	-1.62321	-3.5002	-3.60661	-5.55603	6.89721	102.231	1.24e-10	6.65e-10
Bradi1g30882	-0.455391	-0.444504	0.100086	0.571851	-1.62302	2.56056	39.1342	4.01e-09	1.41e-08
Bradi1g30900	0.970828	0.335518	0.0680363	0.341936	-0.392232	6.50314	48.5792	6.67e-10	2.9e-09
Bradi1g30910	1.17983	0.143655	-0.924399	-0.436607	-0.741432	2.97598	47.0619	8.69e-10	3.65e-09
Bradi1g30930	0.353809	0.00970168	0.535486	1.09959	1.01587	3.92848	28.6632	4.97e-08	1.35e-07
Bradi1g30940	-0.150987	-0.287919	-0.235004	-0.384661	-0.218211	5.29415	5.13779	0.00411782	0.00480283
Bradi1g30960	0.554988	0.717417	0.250938	0.19104	0.405911	4.07889	10.5111	7.22e-05	0.000106564
Bradi1g30970	0.464069	-0.0588693	0.104639	-0.0759392	-0.0167628	4.90784	8.88048	0.000207417	0.000285702
Bradi1g30980	-1.16403	-1.95498	-2.98489	-3.07993	-5.19604	3.91161	96.2906	1.48e-11	1.07e-10
Bradi1g31000	0.486604	0.591006	0.725075	0.536254	0.612107	3.3959	5.00167	0.00468108	0.00542559
Bradi1g31020	0.770954	1.21076	0.934758	-0.01356	-0.655091	4.93953	87.5029	4.36e-12	3.84e-11
Bradi1g31027	0.0730709	0.205198	0.473411	0.2195	0.279695	5.64259	11.3851	4.3e-05	6.57e-05
Bradi1g31050	0.0923566	-1.95737	-2.65199	-3.52872	-4.38882	2.62146	67.2997	1.35e-10	7.16e-10
Bradi1g31066	0.0499632	0.16875	0.387265	0.942012	1.36342	5.00165	65.4766	5.32e-11	3.18e-10
Bradi1g31080	0.48522	-0.0784874	-0.181025	-0.132822	0.0212153	5.31872	16.6593	3.08e-06	5.78e-06
Bradi1g31090	0.309698	0.304874	0.803189	1.23085	0.523519	3.15668	26.3126	9.75e-08	2.48e-07
Bradi1g31112	0.241125	0.386959	0.32636	0.543136	0.67061	4.30728	12.5076	2.29e-05	3.67e-05
Bradi1g31121	-0.249616	-0.253319	-1.08507	-1.97551	-1.15786	2.53548	26.1194	1.03e-07	2.61e-07
Bradi1g31140	0.34875	0.967495	0.279884	0.507161	-0.105434	2.18697	9.5602	0.000131689	0.000186828
Bradi1g31170	0.262663	0.433342	0.427566	0.194961	0.0324792	5.51062	15.1177	6.18e-06	1.09e-05
Bradi1g31180	-0.282157	0.0431208	0.181839	-0.428326	-0.867598	7.88803	20.4535	6.77e-07	1.44e-06
Bradi1g31187	0.349148	0.497509	0.336444	0.151395	0.16157	4.89889	7.53397	0.0005475	0.000708892
Bradi1g31200	0.04699	0.630494	0.970156	2.10799	1.11326	1.4324	24.9223	1.49e-07	3.65e-07
Bradi1g31260	-0.479471	-0.813359	-0.693442	-0.981536	-1.52646	5.97651	63.9202	6.53e-11	3.81e-10
Bradi1g31270	0.199445	-0.237304	-0.390968	0.21756	1.02151	4.22221	76.7709	1.35e-11	9.92e-11
Bradi1g31280	-1.00736	-1.12963	-0.720581	-0.455612	-1.71815	8.03796	42.1362	2.28e-09	8.51e-09
Bradi1g31307	0.0552181	0.137312	0.359059	0.455237	-0.0687746	4.15027	11.8699	3.26e-05	5.07e-05
Bradi1g31320	-0.166409	-0.260752	-0.634852	-0.821849	-1.57362	5.94876	63.4019	7e-11	4.04e-10
Bradi1g31330	-0.502711	-0.507614	-0.509943	-0.362333	-0.310864	5.46012	5.56185	0.00282951	0.00336134
Bradi1g31370	0.0751347	-0.288978	-0.172481	0.358172	1.53233	3.6254	91.7899	2.87e-12	2.7e-11
Bradi1g31380	0.0595133	0.0339438	-0.0286958	-0.149145	0.431515	6.52682	26.7479	8.58e-08	2.21e-07
Bradi1g31400	0.216259	0.242303	0.822977	1.26943	1.48017	1.98816	15.2919	5.69e-06	1.02e-05
Bradi1g31417	0.11973	0.0347897	-0.0975794	-0.139048	0.401937	4.5722	7.99426	0.00038846	0.000514347
Bradi1g31430	-0.125904	-0.098623	0.046825	0.468185	-0.0849131	2.43383	5.28242	0.00359989	0.00422322
Bradi1g31450	-0.267616	-0.0739862	0.0723338	-0.181015	-0.637297	6.45011	16.0225	4.08e-06	7.48e-06
Bradi1g31460	-0.343629	-0.27211	-0.493078	-0.689279	-0.391673	6.38661	5.98346	0.00205138	0.00247327
Bradi1g31520	0.713633	0.327386	0.802234	0.556615	1.05208	1.9351	6.58019	0.00116285	0.00144586
Bradi1g31538	0.537178	0.876217	1.02444	1.25604	1.08073	3.18272	18.5447	1.41e-06	2.81e-06
Bradi1g31570	0.331755	-0.00170898	0.332979	0.0712704	-0.473856	5.53341	41.7735	2.34e-09	8.72e-09
Bradi1g31580	0.444557	0.802145	0.904783	0.574805	0.597609	4.26474	19.2152	1.08e-06	2.21e-06
Bradi1g31600	0.161024	2.25602	2.42737	2.48013	1.05943	3.46175	134.562	1e-13	1.74e-12
Bradi1g31605	2.33019	4.16265	2.73484	0.486396	-1.62882	4.54524	175.668	1.08e-13	1.84e-12
Bradi1g31610	1.15787	4.07269	4.52821	1.16714	-0.835595	1.62712	159.093	2.27e-14	5.51e-13
Bradi1g31612	1.13482	2.94105	2.08469	0.145227	-2.40873	3.87244	256.777	3.17e-16	2.61e-14
Bradi1g31630	-0.0263455	-0.0150816	-0.103161	-0.186261	-0.693472	4.62215	15.7173	4.68e-06	8.49e-06
Bradi1g31640	-0.0549387	0.0065636	0.0759527	0.563689	-0.62922	4.90429	25.9054	1.1e-07	2.77e-07
Bradi1g31656	0.0397326	0.0820233	-0.0973234	0.164735	0.807153	1.93347	7.6662	0.000495465	0.000645081
Bradi1g31660	-0.323233	-0.425259	-1.10324	-1.05068	-0.00352909	4.44347	46.6373	9.38e-10	3.9e-09
Bradi1g31670	0.0282142	-0.387957	-1.09669	-2.44016	-1.38133	2.91131	82.7536	7.07e-12	5.77e-11
Bradi1g31680	0.512372	0.445946	-0.50649	-0.857971	-1.38508	6.01082	103.968	9.68e-13	1.09e-11
Bradi1g31690	0.0189953	0.212588	0.379346	0.235615	-0.0665076	8.19529	9.12292	0.000175941	0.000244755
Bradi1g31710	-0.0546399	-0.0539556	0.0390162	0.219886	0.436754	3.89587	7.42128	0.000596643	0.000768811
Bradi1g31737	-0.239186	-0.0141559	0.225037	0.420655	0.409805	3.28542	15.258	5.78e-06	1.03e-05
Bradi1g31750	0.170197	-0.0633665	-0.360718	-0.348718	-0.824521	5.18374	16.4295	3.41e-06	6.35e-06
Bradi1g31760	0.285334	0.351202	0.590684	0.735701	0.827142	3.925	15.6954	4.73e-06	8.56e-06
Bradi1g31767	-0.0158051	-0.11105	0.230985	0.472296	0.140873	2.97783	7.57667	0.000530067	0.000687149
Bradi1g31780	-0.0656013	-0.497906	-0.639768	-0.961338	0.608736	6.04427	78.2756	1.14e-11	8.65e-11
Bradi1g31800	0.204552	0.665527	1.0265	0.828492	-0.103472	6.66367	52.8947	3.26e-10	1.54e-09
Bradi1g31810	0.342243	-0.192632	-0.713651	-1.0699	1.06887	4.95698	77.0781	1.31e-11	9.65e-11
Bradi1g31816	-1.05649	-0.848104	-0.338224	0.329182	-0.528256	4.56326	37.6164	5.55e-09	1.88e-08
Bradi1g31820	-0.0747004	0.0532517	-0.26673	-0.339876	-0.501792	6.7034	9.28354	0.000158015	0.000221367
Bradi1g31830	-0.155479	-0.256146	0.0800445	0.236246	0.104453	4.39357	6.83202	0.000947553	0.00119384
Bradi1g31837	0.16705	-0.251511	-0.0947929	-0.218686	-0.763543	2.52321	9.56799	0.000131021	0.000185946
Bradi1g31850	0.255133	0.512082	0.285046	0.152489	-0.156294	6.59901	24.6668	1.61e-07	3.93e-07
Bradi1g31860	-0.0528449	-0.21201	0.0634916	0.502258	-0.0157006	4.61631	17.2894	2.35e-06	4.52e-06
Bradi1g31890	0.401137	-0.766782	-0.843727	-0.956138	0.237643	4.57463	43.9247	1.54e-09	6.04e-09
Bradi1g31900	-0.113233	-0.124011	-0.159852	0.13931	0.318628	3.75258	6.57467	0.00116814	0.00145221
Bradi1g31950	-0.0351677	0.698613	0.495009	-0.276111	-0.548631	2.93312	19.4732	9.78e-07	2.02e-06
Bradi1g31971	-0.635259	-0.0199805	0.267919	-0.566133	0.111193	2.28787	5.52522	0.00288429	0.00342287
Bradi1g31980	-0.273136	-0.0976381	-0.217042	-0.441477	-0.665373	3.74606	9.66787	0.000122789	0.000174956
Bradi1g31987	0.995342	0.676189	0.306251	0.696741	0.690316	5.92957	16.5412	3.44e-06	6.41e-06
Bradi1g32010	-0.176487	-0.23735	0.0094282	0.656659	0.298597	5.89647	23.5329	2.32e-07	5.44e-07
Bradi1g32020	-0.404122	-0.44418	-0.395681	-0.199343	-0.348249	5.52544	6.43714	0.00130885	0.00161753
Bradi1g32040	-0.172365	-0.327109	0.0518556	0.229942	0.624459	3.90592	27.3072	7.29e-08	1.91e-07
Bradi1g32060	-0.354369	-0.546721	-1.66666	-2.87466	-5.19332	6.68167	107.757	2.99e-11	1.94e-10
Bradi1g32100	0.962207	0.162854	0.728113	0.381266	2.90765	1.23485	29.2385	4.24e-08	1.17e-07
Bradi1g32160	0.456348	0.216516	0.0989006	-0.371189	-0.687814	3.10577	12.5583	2.23e-05	3.58e-05
Bradi1g32170	0.175416	0.00826419	0.289361	0.432625	0.136599	4.13535	4.4575	0.00794894	0.0089861
Bradi1g32200	0.773489	1.12227	1.34641	0.919175	0.00602046	1.91699	14.5333	8.15e-06	1.41e-05
Bradi1g32219	-0.229014	-0.354481	-0.419054	-0.520716	-0.244602	4.84178	5.22395	0.00380011	0.00444839
Bradi1g32280	0.0831697	-0.0801999	0.555624	0.681485	-0.937861	2.12408	12.6727	2.1e-05	3.37e-05
Bradi1g32300	0.136989	0.363929	0.414381	0.359921	0.559835	5.03282	6.59083	0.00115273	0.00143383
Bradi1g32310	0.112165	-0.124716	-0.673096	-0.870942	-0.0816841	9.28851	69.5078	3.19e-11	2.04e-10
Bradi1g32317	-0.00388604	0.307718	0.0830165	-0.536288	0.281684	5.66328	28.0266	5.94e-08	1.59e-07
Bradi1g32330	-0.255586	-0.355726	-0.391931	-0.40607	-0.130177	4.7607	8.10783	0.000357594	0.000476063
Bradi1g32340	-0.122588	-0.245377	0.167865	0.999673	1.2344	4.511	106.246	8.01e-13	9.3e-12
Bradi1g32350	0.230105	0.00730098	0.0933119	0.104441	0.538767	5.33685	13.5328	1.34e-05	2.23e-05
Bradi1g32370	1.66092	0.999544	1.29776	1.12354	1.24105	5.08337	18.3086	2.94e-06	5.54e-06
Bradi1g32380	0.655454	0.833323	-0.383516	-0.57887	0.495117	3.08813	20.6479	6.3e-07	1.35e-06
Bradi1g32400	1.21179	1.52859	1.02106	0.461073	-0.999933	2.04077	36.3571	7.33e-09	2.43e-08
Bradi1g32410	-0.0643774	0.0171451	-0.21041	0.190486	0.789987	4.46713	17.2308	2.41e-06	4.62e-06
Bradi1g32420	1.14421	-0.0708051	-2.46577	-1.92199	-0.5938	1.94514	28.5753	7.6e-08	1.98e-07
Bradi1g32460	-0.213521	0.278325	-0.42911	-0.547736	-0.494458	7.81339	26.5269	9.15e-08	2.34e-07
Bradi1g32490	0.210205	0.208214	-0.0511632	-0.329286	-0.632806	6.08027	22.4861	3.3e-07	7.47e-07
Bradi1g32500	0.0489697	0.10877	0.262392	0.593984	0.15575	5.39978	17.4922	2.16e-06	4.18e-06
Bradi1g32521	-0.592972	-1.42276	-2.6267	-3.05113	-2.55456	1.80029	99.1272	1.47e-12	1.54e-11
Bradi1g32530	0.021809	0.0433547	0.32164	0.4566	-0.756498	5.58161	75.1778	1.62e-11	1.16e-10
Bradi1g32547	0.00732413	0.0664525	0.258429	0.325889	0.713258	4.30732	9.624	0.000126332	0.000179639
Bradi1g32570	0.0885926	0.457705	0.383399	0.117051	-0.260133	3.97842	13.3542	1.47e-05	2.43e-05
Bradi1g32580	-8.66e-05	0.181961	0.466122	0.497537	0.230144	4.08848	8.05682	0.000371108	0.000492953
Bradi1g32590	-0.427833	-0.612617	0.0394957	1.14252	-0.299481	4.79087	56.0386	2e-10	1.01e-09
Bradi1g32600	-0.0445764	0.120185	0.424192	0.790365	0.194136	5.09784	33.8081	1.32e-08	4.12e-08
Bradi1g32610	-0.0842148	-0.23597	0.234889	0.447345	0.52487	3.53095	18.3016	1.55e-06	3.08e-06
Bradi1g32620	-1.39561	-0.978885	-1.37089	-1.7222	-2.76838	3.59178	43.7159	2.19e-09	8.22e-09
Bradi1g32630	1.14098	0.58762	-0.307011	-0.530146	-1.87737	6.33543	345.378	2.22e-17	4.47e-15
Bradi1g32640	0.292174	0.391757	1.19233	1.41462	-0.611075	6.45778	184.33	6.14e-15	2.12e-13
Bradi1g32645	0.0984248	0.124043	0.457762	0.543084	0.582739	2.99865	7.88666	0.000420441	0.000554094
Bradi1g32650	-0.106366	-0.258423	0.209274	0.0257334	-1.66946	4.80178	47.1909	8.5e-10	3.57e-09
Bradi1g32655	-0.113126	-0.213026	0.207843	0.73985	0.600137	5.13918	40.4251	3.07e-09	1.11e-08
Bradi1g32660	-0.158171	0.394457	1.06522	0.862599	-0.285529	3.59932	35.1155	9.73e-09	3.13e-08
Bradi1g32690	0.152662	0.292613	0.416377	0.78335	0.708641	3.92137	19.2482	1.07e-06	2.19e-06
Bradi1g32700	0.136058	0.591314	-0.104185	-0.137331	-0.350992	7.69713	29.2708	4.21e-08	1.16e-07
Bradi1g32710	1.99484	1.0889	-0.407182	-1.4489	-4.3675	1.85107	152.157	3.38e-14	7.36e-13
Bradi1g32726	0.106917	0.289364	0.281718	0.299785	-0.0253637	3.85044	5.40107	0.00322838	0.00381183
Bradi1g32785	0.317008	0.400927	0.597109	-0.685145	-1.55666	2.34543	21.5733	4.52e-07	9.97e-07
Bradi1g32792	-0.291906	-0.00657584	0.055712	-0.419599	-0.421785	4.37525	15.5702	5.01e-06	9.02e-06
Bradi1g32800	0.272043	0.240703	-0.571444	0.02471	0.919468	6.49725	64.216	6.28e-11	3.68e-10
Bradi1g32810	0.606423	0.303424	-0.0112351	-1.18117	-1.54883	2.79251	53.1216	3.14e-10	1.49e-09
Bradi1g32821	-0.459276	-0.467499	-0.395103	-0.180491	-0.490055	5.23005	5.12994	0.00421806	0.00491441
Bradi1g32840	1.07986	0.948572	-0.239497	-0.453988	-0.550566	6.04094	71.6756	2.9e-11	1.89e-10
Bradi1g32860	0.745226	1.13196	0.228252	-0.0873807	0.120271	10.5393	83.5824	6.49e-12	5.36e-11
Bradi1g32881	0.182392	0.574411	-0.0687717	-0.463142	-0.750188	2.48414	15.6763	4.77e-06	8.63e-06
Bradi1g32920	0.14905	0.375645	0.669592	0.749983	-0.668362	5.21572	19.6594	1.58e-06	3.14e-06
Bradi1g32927	0.116718	0.315223	-0.272454	-0.539905	-0.52556	4.74661	12.1856	2.94e-05	4.62e-05
Bradi1g32933	-0.220366	0.211333	-0.0201222	0.086863	0.558353	4.90685	17.1262	2.52e-06	4.81e-06
Bradi1g32951	0.0291714	0.566709	0.496591	0.242872	0.565593	3.49743	8.40402	0.000289123	0.000390593
Bradi1g32960	-0.0762305	-0.0192136	0.355696	0.871967	0.82084	5.63008	51.0177	4.42e-10	2.02e-09
Bradi1g32970	0.184852	0.233988	0.574019	0.730312	0.526309	4.53865	19.6954	8.99e-07	1.87e-06
Bradi1g33010	0.0459313	-0.117037	-0.148718	-0.323656	0.686311	4.41799	19.7573	8.78e-07	1.83e-06
Bradi1g33020	0.629638	0.272505	1.16765	1.04518	1.33799	1.94615	10.5051	7.25e-05	0.000106935
Bradi1g33030	-0.000514385	-0.273911	-0.926686	-1.68194	0.202968	6.61665	71.6603	2.45e-11	1.64e-10
Bradi1g33040	-0.407306	0.0310392	1.93995	2.31011	0.64945	3.04516	53.5381	3.98e-10	1.84e-09
Bradi1g33050	-2.37767	-3.83216	-5.10749	-4.49619	-5.74206	6.20013	136.709	2.24e-11	1.52e-10
Bradi1g33097	-0.0717547	-0.30148	-0.380909	-0.318266	0.291545	5.1518	14.4265	8.59e-06	1.48e-05
Bradi1g33110	-0.165783	-0.516325	-0.277037	-0.00056411	0.168479	4.93414	12.8163	1.94e-05	3.14e-05
Bradi1g33130	0.261601	0.303727	0.144664	0.301822	-0.289489	5.26299	16.8789	2.8e-06	5.31e-06
Bradi1g33150	-0.0415818	0.646319	1.8593	1.96153	0.511551	4.1814	47.4321	1.85e-09	7.08e-09
Bradi1g33160	0.111714	-0.163977	-1.41944	-1.34965	0.593634	3.64333	58.9191	1.31e-10	6.94e-10
Bradi1g33190	-0.237444	-0.0741715	-0.178012	-0.00962345	-0.737449	3.84287	10.6182	6.77e-05	0.0001003
Bradi1g33200	0.617155	1.14166	1.35187	1.05279	-0.430788	6.9736	100.559	1.3e-12	1.39e-11
Bradi1g33210	0.189992	0.495908	0.885595	0.942109	0.21124	3.4552	25.6098	1.21e-07	3.01e-07
Bradi1g33230	-0.381995	-0.32528	0.877963	0.626739	0.696815	6.45099	67.4028	4.15e-11	2.58e-10
Bradi1g33240	-0.398997	-0.440267	-0.329894	-0.0965191	-0.235692	8.57529	6.31206	0.00145322	0.00178688
Bradi1g33280	-0.252474	-0.652984	-0.116398	0.0312971	0.190285	4.52084	26.822	8.39e-08	2.17e-07
Bradi1g33290	0.236234	0.166664	0.231679	0.479661	0.0755449	4.36783	6.74201	0.00101899	0.00127807
Bradi1g33300	-0.143058	-0.121101	-0.505752	-1.21289	-0.707506	4.70437	23.9412	2.03e-07	4.84e-07
Bradi1g33303	-0.659489	-0.553753	-0.132382	0.41218	0.349666	3.7628	10.4769	8.8e-05	0.000127968
Bradi1g33310	0.153399	0.162321	0.387316	0.568951	-0.161871	5.55401	28.8009	4.78e-08	1.3e-07
Bradi1g33320	0.123763	0.342303	-0.333452	-0.532074	-0.629421	7.93754	33.3697	1.47e-08	4.52e-08
Bradi1g33330	0.00709079	-0.0222201	0.376305	0.844064	0.844517	7.07123	77.0409	1.31e-11	9.67e-11
Bradi1g33340	-0.15541	-0.373744	-0.38408	-0.297679	0.328497	5.38322	37.763	5.38e-09	1.83e-08
Bradi1g33347	-0.459157	-0.563063	-0.482778	0.293419	0.192325	5.28315	23.8561	2.09e-07	4.96e-07
Bradi1g33360	0.154009	0.458396	0.828064	1.40418	1.56069	1.9428	21.7643	4.23e-07	9.37e-07
Bradi1g33380	0.205777	0.572889	0.252221	0.628848	0.00425935	5.90074	12.6124	2.17e-05	3.48e-05
Bradi1g33390	0.807438	0.857346	0.250379	0.426116	-0.11708	6.15546	30.6453	2.92e-08	8.35e-08
Bradi1g33401	-0.275713	-0.477809	-0.264749	-0.0927605	-0.554572	4.89143	8.81312	0.000217235	0.000298306
Bradi1g33410	-0.540724	-0.76273	-0.491898	-0.17431	-0.501661	4.72611	9.38403	0.000147833	0.000208117
Bradi1g33420	-1.15537	-0.856931	0.16338	0.431013	-0.0530961	4.97878	14.0924	2.95e-05	4.63e-05
Bradi1g33457	1.15765	1.62469	1.41051	1.07019	-0.0531367	6.27986	98.0881	1.61e-12	1.65e-11
Bradi1g33470	-0.0671483	0.40838	1.89708	1.76528	1.08384	5.24509	120.137	2.72e-13	3.88e-12
Bradi1g33490	0.291086	0.272736	-0.345781	-0.64324	2.07451	2.48894	80.8805	8.62e-12	6.81e-11
Bradi1g33500	0.408218	0.359419	-0.172466	-1.20598	0.658955	1.94111	25.2087	1.36e-07	3.37e-07
Bradi1g33510	1.39219	1.58961	1.4825	1.3211	0.901658	3.99719	14.8987	1.03e-05	1.76e-05
Bradi1g33520	-0.00555481	-0.181713	-0.343707	-0.476531	-0.393243	6.34642	8.8864	0.000206578	0.000284644
Bradi1g33530	-0.680107	-0.982256	0.500566	0.642955	-1.98249	4.83584	31.1382	1.96e-07	4.67e-07
Bradi1g33560	0.0202904	-0.18365	0.155589	0.361297	0.603545	4.64294	20.7734	6.02e-07	1.29e-06
Bradi1g33610	0.0491705	-0.0216636	0.0227268	0.146351	0.418976	6.10451	9.51437	0.000135693	0.000192219
Bradi1g33620	0.912824	0.581084	-0.121246	-0.261659	-0.539153	4.73564	20.4215	1.26e-06	2.55e-06
Bradi1g33630	0.243642	0.189266	0.341167	-0.505684	-0.475462	2.50965	7.6695	0.000494237	0.000643655
Bradi1g33657	-0.197123	-0.10203	0.329105	0.46893	0.00479925	4.09629	7.51689	0.000554654	0.000717526
Bradi1g33670	-0.103927	-0.566074	-2.10215	-1.55994	-1.98562	4.3425	29.4088	2.31e-07	5.41e-07
Bradi1g33690	-0.461659	-0.207788	2.41453	2.24542	0.00779279	3.62666	104.532	1.29e-12	1.39e-11
Bradi1g33700	-0.372206	-0.196005	0.62271	0.524449	-0.240256	5.19229	23.9391	2.08e-07	4.93e-07
Bradi1g33720	-0.293863	-0.432758	-0.416564	-0.549529	-0.766319	7.69426	13.8394	1.15e-05	1.93e-05
Bradi1g33740	-0.319399	-0.466648	-0.69791	-0.0867647	-0.758785	6.17841	16.9055	2.77e-06	5.25e-06
Bradi1g33790	-0.51904	-0.0845843	0.205032	-0.0782744	0.970035	2.32684	17.1932	2.45e-06	4.69e-06
Bradi1g33800	-0.0223037	-0.291254	-0.536653	-0.517507	-0.0563535	6.76714	21.3055	4.97e-07	1.09e-06
Bradi1g33810	-0.79671	-1.19211	-4.46263	-2.86091	-2.13595	1.53696	44.5729	1.37e-09	5.43e-09
Bradi1g33827	-0.248849	-1.16957	-3.33022	-1.54187	-1.45618	3.34438	149.214	4.01e-14	8.4e-13
Bradi1g33850	-0.297613	-0.186616	0.169408	0.0569348	-0.320124	5.42898	5.95882	0.00196511	0.00237603
Bradi1g33860	0.853839	0.73366	1.54112	1.28343	0.752475	8.79953	33.1783	1.54e-08	4.71e-08
Bradi1g33903	-0.679033	-0.886268	-1.32293	-0.538132	1.16824	2.24129	64.4197	6.11e-11	3.6e-10
Bradi1g33930	0.0120198	-0.452463	-0.8116	-0.321175	-1.04183	5.12575	51.828	3.87e-10	1.79e-09
Bradi1g33940	0.118809	-0.50038	0.0646043	0.945071	0.128725	3.66121	19.2704	1.06e-06	2.17e-06
Bradi1g33950	-1.7514	-1.33772	1.1064	2.02801	-2.99722	6.44073	32.3261	8.21e-07	1.72e-06
Bradi1g33960	-0.238592	-0.323401	0.595178	1.42497	1.14531	4.29465	128.199	1.54e-13	2.43e-12
Bradi1g33990	0.108614	0.255187	0.456056	0.454103	0.374604	3.23009	7.03841	0.000803755	0.00102066
Bradi1g34040	-0.625127	-1.1671	-2.71104	-1.76145	0.400755	3.87733	65.3019	1e-10	5.54e-10
Bradi1g34060	0.279422	0.722158	0.566656	0.347199	0.307355	4.74593	12.7226	2.04e-05	3.29e-05
Bradi1g34070	0.363282	0.156112	0.267351	0.0870424	0.755985	5.34859	20.1694	7.52e-07	1.58e-06
Bradi1g34120	0.458534	0.73466	0.891616	0.547597	-0.245755	5.42843	40.2972	3.15e-09	1.14e-08
Bradi1g34130	-0.0493973	0.0305407	-0.234279	0.199712	0.581635	5.0579	44.0175	1.52e-09	5.96e-09
Bradi1g34140	0.265764	0.593588	1.68394	1.51492	0.314002	5.23151	46.546	1.84e-09	7.05e-09
Bradi1g34150	0.917274	0.613363	0.0921896	-0.143883	0.0501498	3.64269	29.2662	4.21e-08	1.16e-07
Bradi1g34170	-0.0329982	0.00373234	0.137088	0.257113	0.00138029	8.57408	5.36503	0.00333654	0.00393319
Bradi1g34180	0.248185	0.178406	0.455526	0.389237	0.385713	6.0025	7.1138	0.000757394	0.000964217
Bradi1g34190	0.52	0.326942	-0.433311	-0.655868	-0.373047	6.62277	44.1633	1.48e-09	5.81e-09
Bradi1g34200	-0.484531	-0.470749	-0.490042	-0.198768	-0.228387	7.93267	5.11399	0.00423731	0.00493576
Bradi1g34250	0.552863	1.4505	1.96759	1.02961	1.38094	3.89159	49.088	6.11e-10	2.68e-09
Bradi1g34327	1.38886	0.821659	0.608658	-0.010533	-0.632324	4.71946	93.0146	2.56e-12	2.45e-11
Bradi1g34340	1.87847	1.39901	1.87648	1.63742	0.960825	5.34825	45.2492	1.64e-09	6.36e-09
Bradi1g34350	-0.240757	-0.424908	0.532858	0.597272	0.0810476	6.0643	29.7543	3.69e-08	1.03e-07
Bradi1g34360	-0.134573	-0.259481	-0.0738567	0.643042	-0.211679	5.39405	35.7166	8.47e-09	2.77e-08
Bradi1g34370	0.473403	0.163429	-1.05058	-1.93603	-1.60422	1.9814	83.3623	6.64e-12	5.47e-11
Bradi1g34407	2.33689	1.25738	1.66169	0.562308	-0.254982	4.8746	34.7297	1e-07	2.55e-07
Bradi1g34413	0.425251	-0.563206	-0.563167	-0.683908	-0.43362	2.26974	10.8228	5.98e-05	8.94e-05
Bradi1g34470	-0.270349	-1.01202	-1.82188	-2.0892	0.733952	3.68503	175.879	9.32e-15	2.84e-13
Bradi1g34500	-0.504998	-2.13752	-3.12841	-5.74326	-1.20774	1.78529	58.1984	1.45e-10	7.61e-10
Bradi1g34507	0.00715762	-0.272569	0.326913	1.11963	0.388363	3.58469	54.4445	2.55e-10	1.25e-09
Bradi1g34525	-0.167896	-0.952057	-1.93611	-3.07843	-0.12821	6.43572	189.507	4.8e-15	1.79e-13
Bradi1g34530	0.601539	0.642858	0.46393	0.297057	0.562362	4.21032	8.00711	0.000384823	0.000509824
Bradi1g34537	0.0580179	0.0753358	0.365205	1.21556	0.906131	4.40058	50.1541	5.1e-10	2.29e-09
Bradi1g34550	0.014658	0.374315	1.25377	1.54238	0.193797	3.20464	57.9984	1.49e-10	7.82e-10
Bradi1g34560	-0.33108	-0.752053	-1.06498	-1.41228	-0.123287	7.39355	103.715	9.89e-13	1.11e-11
Bradi1g34566	-0.298125	-0.377644	-0.127622	-0.110147	0.137831	4.57139	16.0456	4.04e-06	7.41e-06
Bradi1g34610	0.814344	0.171415	-1.19407	-1.52273	-0.223003	2.78614	50.1584	5.1e-10	2.29e-09
Bradi1g34647	0.494473	0.391487	-1.29695	-2.04098	0.0664	3.78896	47.5738	1.16e-09	4.69e-09
Bradi1g34660	0.0902352	0.106545	0.394252	0.655528	0.55183	2.41502	7.50375	0.000560227	0.00072438
Bradi1g34670	0.342146	0.0649013	-0.727644	-1.32307	-0.541762	3.91511	27.0788	8.59e-08	2.21e-07
Bradi1g34681	0.0878505	-0.161679	-0.100464	0.402156	0.441569	3.68635	9.75548	0.000116038	0.000165836
Bradi1g34700	1.1611	0.563616	0.227748	-0.0672955	-1.17945	7.26036	115.698	3.79e-13	5.08e-12
Bradi1g34707	-0.120786	0.0039822	0.133724	0.279168	0.0377301	5.10082	7.17954	0.000719366	0.000918129
Bradi1g34717	-0.0935012	-0.132686	0.298949	1.3421	0.268918	2.73919	37.9043	5.21e-09	1.78e-08
Bradi1g34727	0.278056	2.32686	3.85255	2.05051	-0.407385	4.7146	265.366	3.13e-16	2.58e-14
Bradi1g34740	0.0089595	0.038618	-0.285355	-0.29337	-0.751496	5.10448	14.0723	1.02e-05	1.74e-05
Bradi1g34750	-0.146103	-0.0465282	0.171117	0.198219	0.0389191	7.90189	4.34802	0.00887277	0.0099807
[truncated: 12,314 more rows]
