# Supplementary material for: Time-series transcriptome of Brachypodium distachyon during bacterial flagellin-induced pattern-triggered immunity
Source: Front Plant Sci. 2022 Sep 15;13:1004184. doi: 10.3389/fpls.2022.1004184 (PMC9521188; doi:10.3389/fpls.2022.1004184)
Supplement: Supplementary file 6 [file Table_5.xlsx]

## Sheet: TableS5
Supplementary Table S5. Gene expression dynamics with z-scaling of differentially expressed genes (DEGs) (> 2-fold, p < 0.01) of Brachypodium distachyon during PTI (0, 0.5, 1, 3, 6, and 12 hours) in response to flg22
GeneID	Cluster	cpm of genes with 2 fold change to control							Fold change to control						Gene expression dynamics with z-scaring
		0 h	0.5 h	1 h	3 h	6 h	12 h		0.5 h	1 h	3 h	6 h	12 h		0 h	0.5 h	1 h	3 h	6 h	12 h
Bradi1g00563	1	6.5971	2.96937	2.42055	1.62801	1.02778	0.775099		0.450103	0.366911	0.246777	0.155793	0.117491		1.88244	0.18683	-0.0696909	-0.440125	-0.720678	-0.838781
Bradi1g00740	1	25.3828	14.8723	11.0089	15.8262	24.394	23.5307		0.585918	0.433716	0.623499	0.961044	0.927031		1.03229	-0.713852	-1.35567	-0.555376	0.868019	0.72459
Bradi1g00900	1	55.7467	24.8986	18.3017	30.7612	37.0939	27.937		0.446638	0.328301	0.551804	0.665402	0.501143		1.79185	-0.581477	-1.08902	-0.130429	0.356783	-0.34771
Bradi1g00970	1	7.00706	4.17203	3.56504	6.12562	7.23824	1.09202		0.595404	0.508779	0.874207	1.03299	0.155845		0.901022	-0.292416	-0.547934	0.529969	0.998342	-1.58898
Bradi1g03760	1	88.2907	39.9202	21.9469	5.06497	6.61602	6.89233		0.452145	0.248576	0.057367	0.0749345	0.0780641		1.85819	0.364367	-0.1907	-0.712064	-0.664163	-0.65563
Bradi1g03770	1	117.282	12.527	6.64496	1.62355	2.16141	1.58856		0.106811	0.056658	0.0138431	0.0184292	0.0135448		2.03253	-0.24116	-0.368829	-0.477818	-0.466144	-0.478577
Bradi1g03780	1	66.6222	8.5779	1.57621	0.803656	0.645523	0.240784		0.128754	0.0236589	0.0120629	0.00968931	0.00361417		2.02682	-0.170332	-0.435367	-0.46461	-0.470596	-0.485917
Bradi1g03790	1	11.1766	1.87299	1.92202	1.0122	1.12618	1.00316		0.167582	0.171968	0.0905648	0.100762	0.0897556		2.03011	-0.285157	-0.272956	-0.499369	-0.471006	-0.50162
Bradi1g04150	1	666.862	222.713	218.461	195.387	202.617	48.2083		0.333972	0.327596	0.292994	0.303837	0.0722913		1.93993	-0.172808	-0.193034	-0.302795	-0.2684	-1.0029
Bradi1g05480	1	155.345	75.4204	59.8631	97.0972	135.138	56.4886		0.485504	0.385357	0.625044	0.869923	0.363634		1.43908	-0.517465	-0.898309	0.0131844	0.944423	-0.980917
Bradi1g05620	1	21.3279	11.5148	9.20377	7.76539	6.03791	11.8752		0.539892	0.431537	0.364096	0.2831	0.556791		1.86118	0.0421288	-0.386254	-0.652884	-0.973105	0.108939
Bradi1g05768	1	28.4849	10.6877	17.2455	11.3707	7.25627	5.22435		0.375207	0.605424	0.399184	0.254741	0.183407		1.78431	-0.317786	0.456771	-0.237116	-0.72309	-0.963087
Bradi1g05788	1	904.053	392.294	501.503	376.893	306.043	177.422		0.433928	0.554728	0.416893	0.338523	0.196252		1.84489	-0.203053	0.233979	-0.264684	-0.54821	-1.06292
Bradi1g05801	1	1723.1	890.879	1046.72	724.554	637.458	444.794		0.517021	0.607466	0.420495	0.369949	0.258136		1.81059	-0.0454346	0.30213	-0.416373	-0.610613	-1.0403
Bradi1g05804	1	162.82	96.9546	95.208	65.7714	47.2549	42.2727		0.595471	0.584744	0.403951	0.290227	0.259628		1.74578	0.267292	0.228087	-0.432681	-0.848324	-0.960159
Bradi1g06190	1	53.0918	17.2737	7.59965	6.23901	6.27381	3.739		0.325356	0.143142	0.117514	0.118169	0.0704251		1.97736	0.0830795	-0.428546	-0.500505	-0.498664	-0.632721
Bradi1g06451	1	121.095	58.4968	47.328	26.1326	11.0552	34.3567		0.483064	0.390833	0.215802	0.0912933	0.283716		1.84665	0.22653	-0.0625306	-0.611093	-1.00131	-0.398243
Bradi1g06550	1	8.91036	4.52094	6.51951	5.17986	3.87738	4.25714		0.50738	0.731678	0.58133	0.435155	0.477774		1.77923	-0.540857	0.515515	-0.192577	-0.881016	-0.680291
Bradi1g06670	1	177.569	125.556	109.256	107.178	81.5567	90.4788		0.707081	0.615285	0.603583	0.459296	0.509541		1.82305	0.301098	-0.175858	-0.236659	-0.986347	-0.72528
Bradi1g06695	1	595.308	280.331	104.633	16.1641	0.311881	2.50151		0.470901	0.175763	0.0271525	0.000523898	0.00420203		1.81911	0.48277	-0.262656	-0.638	-0.705255	-0.695965
Bradi1g07001	1	13.9748	6.01874	5.79541	9.75356	10.9199	8.36904		0.430684	0.414703	0.697937	0.781396	0.598865		1.55374	-1.00231	-1.07406	0.197575	0.572278	-0.247228
Bradi1g07660	1	108.656	38.0951	41.7934	19.6608	17.4432	6.85979		0.350604	0.384641	0.180946	0.160537	0.0631334		1.90512	-0.017885	0.0829072	-0.520278	-0.580715	-0.869147
Bradi1g07870	1	93.389	53.2144	33.7646	24.3121	33.3552	43.3762		0.569814	0.361548	0.260331	0.357164	0.464468		1.8731	0.254347	-0.52934	-0.910209	-0.545836	-0.142062
Bradi1g09177	1	139.72	53.8266	25.8244	4.91017	4.05389	4.14258		0.385246	0.184829	0.0351429	0.0290144	0.0296491		1.89903	0.283617	-0.243024	-0.63636	-0.652464	-0.650796
Bradi1g09570	1	44.8826	6.51474	3.78558	0.803566	0.912768	1.14046		0.145151	0.0843441	0.0179037	0.0203368	0.0254099		2.02435	-0.1816	-0.338512	-0.509962	-0.503684	-0.490592
Bradi1g11580	1	44.5145	18.3233	12.3943	16.1784	13.1831	18.1997		0.411626	0.278433	0.363442	0.296153	0.408849		1.99766	-0.177949	-0.67045	-0.356115	-0.604929	-0.188217
Bradi1g12715	1	22.4512	9.07658	9.39869	13.383	22.4406	17.0282		0.404281	0.418628	0.596093	0.999527	0.758454		1.1316	-1.08709	-1.03365	-0.372703	1.12984	0.231993
Bradi1g13240	1	17.6126	9.37817	6.99676	4.34093	3.30945	8.31455		0.53247	0.397259	0.246467	0.187902	0.47208		1.82024	0.206336	-0.260407	-0.780936	-0.983101	-0.00212922
Bradi1g13760	1	12.7418	2.37377	0.852306	0.530978	0.713222	0.519095		0.186297	0.0668904	0.041672	0.0559748	0.0407395		2.01989	-0.120003	-0.434022	-0.500342	-0.462728	-0.502795
Bradi1g14750	1	77.7605	43.1806	22.5985	39.3216	37.6465	20.7219		0.555302	0.290616	0.505676	0.484134	0.266483		1.82551	0.144642	-0.855818	-0.0429355	-0.124359	-0.947034
Bradi1g14780	1	69.6057	13.5634	5.92295	7.86407	14.099	20.5777		0.19486	0.0850929	0.11298	0.202555	0.295633		1.99298	-0.350181	-0.669633	-0.588474	-0.327788	-0.0569072
Bradi1g15450	1	276.286	209.411	127.492	180.425	139.097	158.25		0.75795	0.461449	0.653038	0.50345	0.572777		1.72347	0.503291	-0.991374	-0.0255724	-0.779643	-0.430168
Bradi1g17116	1	7.08566	4.08428	4.30136	2.92675	2.36584	1.51764		0.576414	0.607051	0.413053	0.333891	0.214184		1.72478	0.189604	0.300639	-0.40246	-0.689359	-1.12321
Bradi1g17200	1	9.05962	3.47606	3.8183	3.59697	2.60845	0.656011		0.383687	0.421464	0.397033	0.28792	0.0724104		1.85642	-0.140625	-0.0182169	-0.0973799	-0.450938	-1.14926
Bradi1g17640	1	20.4581	7.19218	2.95018	0.932334	0.909757	1.09126		0.351556	0.144206	0.0455728	0.0444692	0.0533412		1.93766	0.208921	-0.343872	-0.606825	-0.609767	-0.586115
Bradi1g18595	1	40.6221	30.607	32.8307	37.7165	38.9903	19.3224		0.753456	0.808197	0.928471	0.95983	0.475662		0.926292	-0.349068	-0.0659	0.556274	0.718493	-1.78609
Bradi1g19010	1	640.549	321.2	271.162	392.124	70.5276	98.8565		0.501445	0.423327	0.612169	0.110105	0.154331		1.6322	0.105779	-0.133395	0.44478	-1.09238	-0.956979
Bradi1g20085	1	9.10476	5.41709	5.50663	4.35803	6.28387	4.29435		0.594973	0.604808	0.478655	0.690174	0.47166		1.84773	-0.231364	-0.180879	-0.828451	0.257324	-0.864358
Bradi1g20240	1	107.894	21.5673	8.08959	3.75122	2.7832	1.02399		0.199894	0.0749773	0.0347677	0.0257957	0.00949068		2.00849	-0.0628042	-0.386186	-0.490279	-0.513506	-0.555716
Bradi1g20260	1	114.786	13.0394	7.46652	7.02308	7.79413	12.0544		0.113597	0.0650473	0.0611841	0.0679014	0.105017		2.03769	-0.324788	-0.454185	-0.464482	-0.446579	-0.347658
Bradi1g20480	1	17.5957	3.11793	7.8139	2.23425	0.6754	1.21506		0.177199	0.444081	0.126977	0.0383845	0.0690546		1.87706	-0.358945	0.366321	-0.495425	-0.736181	-0.652833
Bradi1g21570	1	20.4394	3.60613	5.62312	2.92891	9.04611	3.71771		0.17643	0.275111	0.143297	0.442581	0.181889		1.92556	-0.591176	-0.289617	-0.692426	0.222152	-0.574494
Bradi1g21900	1	25.6639	14.9133	10.8761	12.9449	19.754	17.9727		0.581101	0.423788	0.504402	0.76972	0.70031		1.62246	-0.395616	-1.15348	-0.765119	0.513071	0.178683
Bradi1g22050	1	96.3296	74.6909	31.5982	60.58	86.852	25.9831		0.775368	0.328022	0.628882	0.901613	0.269732		1.16434	0.415771	-1.07498	-0.0723823	0.836475	-1.26923
Bradi1g22361	1	12.3209	6.06026	2.75318	1.10971	0.0440505	1.11343		0.491867	0.223456	0.0900669	0.00357526	0.0903693		1.81763	0.466242	-0.247601	-0.60235	-0.832376	-0.601546
Bradi1g22920	1	77.0883	54.0792	37.5358	42.4542	51.1291	49.0021		0.701523	0.486919	0.550722	0.663254	0.635662		1.83475	0.159968	-1.04419	-0.686187	-0.0547586	-0.209582
Bradi1g23350	1	297.258	150.274	128.003	98.8361	85.8	63.6151		0.505533	0.430613	0.332493	0.288638	0.214007		1.90099	0.15421	-0.110457	-0.457084	-0.612007	-0.875655
Bradi1g23920	1	12.3343	8.89401	4.82287	7.02521	5.28935	3.95538		0.721076	0.391011	0.569565	0.428831	0.32068		1.68755	0.588149	-0.712835	-0.009049	-0.563766	-0.990051
Bradi1g24051	1	6.99278	0.368671	0.919864	1.37774	1.60874	0.229314		0.0527216	0.131545	0.197023	0.230058	0.032793		1.99461	-0.608022	-0.391457	-0.211558	-0.120795	-0.662775
Bradi1g24310	1	55.4549	29.1622	24.5612	25.3782	24.0395	28.1084		0.525874	0.442904	0.457636	0.433497	0.506871		2.01252	-0.161676	-0.54215	-0.474591	-0.585284	-0.248818
Bradi1g24770	1	29.4814	14.1531	5.90313	7.2467	0.875922	2.89374		0.480068	0.200233	0.245806	0.029711	0.0981549		1.8406	0.385487	-0.39768	-0.270136	-0.874913	-0.683362
Bradi1g24830	1	22.9744	14.5061	12.5144	11.3346	12.0344	11.5		0.631403	0.54471	0.493358	0.523817	0.500558		1.97359	0.0809351	-0.364213	-0.627892	-0.471492	-0.590926
Bradi1g25057	1	54.6476	43.155	32.3569	48.5675	42.7969	27.3001		0.789695	0.592102	0.88874	0.783142	0.499567		1.30158	0.16637	-0.900227	0.701005	0.130998	-1.39973
Bradi1g25070	1	29.6748	4.04648	2.31159	1.51139	3.00627	4.08954		0.136361	0.0778974	0.0509318	0.101307	0.137812		2.03274	-0.310242	-0.468849	-0.542004	-0.40534	-0.306306
Bradi1g27290	1	16.4928	11.6978	8.79086	6.70558	9.20117	7.8727		0.709267	0.533012	0.406576	0.55789	0.477342		1.80171	0.444619	-0.378103	-0.968283	-0.261977	-0.637963
Bradi1g27370	1	45.1989	36.9509	23.1599	20.6952	32.3786	25.9005		0.817517	0.512401	0.457869	0.716358	0.573035		1.55816	0.67091	-0.812601	-1.07774	0.179063	-0.517791
Bradi1g28530	1	210.226	143.243	128.706	118.58	99.2725	93.9815		0.681379	0.612227	0.564061	0.472219	0.447051		1.84077	0.2578	-0.0857619	-0.325063	-0.781355	-0.906395
Bradi1g28760	1	786.382	527.673	437.242	388.081	324.506	491.322		0.671014	0.556018	0.493501	0.412657	0.624788		1.82388	0.218103	-0.343192	-0.648334	-1.04293	-0.00752553
Bradi1g30850	1	29.0545	13.3589	8.73667	18.5414	19.8349	9.18477		0.459786	0.300699	0.63816	0.682679	0.316122		1.63646	-0.401626	-1.00182	0.271332	0.43929	-0.943636
Bradi1g30980	1	46.2464	20.6518	11.9198	5.83646	5.45928	1.2518		0.446559	0.257745	0.126203	0.118048	0.027068		1.86612	0.326324	-0.199	-0.564979	-0.587671	-0.840797
Bradi1g31260	1	100.545	72.1087	57.2216	62.1686	50.9104	34.9009		0.717179	0.569115	0.618317	0.506345	0.347118		1.69292	0.41154	-0.259295	-0.0363755	-0.54369	-1.2651
Bradi1g31280	1	438.681	218.214	200.494	266.202	319.875	133.33		0.497433	0.457039	0.606824	0.729176	0.303935		1.64966	-0.418182	-0.584387	0.0319127	0.535338	-1.21434
Bradi1g32620	1	26.6985	10.1331	13.5447	10.3068	8.0739	3.90993		0.379539	0.50732	0.386044	0.30241	0.146447		1.86596	-0.253023	0.183373	-0.230808	-0.516434	-1.04907
Bradi1g33050	1	327.131	62.9608	22.9542	9.48185	14.4829	6.09737		0.192464	0.0701684	0.0289849	0.0442725	0.0186389		2.01348	-0.0865758	-0.404613	-0.511713	-0.471957	-0.538619
Bradi1g35220	1	13.0406	7.76897	3.37442	3.81202	1.00244	2.79449		0.595751	0.258762	0.292319	0.0768702	0.214291		1.76058	0.56174	-0.437633	-0.338117	-0.97705	-0.569516
Bradi1g38090	1	7.90763	7.32185	4.02875	8.795	2.92378	4.96886		0.925922	0.509477	1.11222	0.369742	0.628362		0.815633	0.566352	-0.835026	1.19325	-1.30525	-0.434964
Bradi1g38210	1	36.4173	9.78869	8.37293	7.62289	5.02836	5.85084		0.268793	0.229917	0.209321	0.138076	0.160661		2.02028	-0.19934	-0.317351	-0.379871	-0.596137	-0.52758
Bradi1g39211	1	1282.1	778.048	903.673	701.83	614.503	390.658		0.606855	0.704838	0.547407	0.479295	0.304702		1.67417	-0.00139872	0.416204	-0.254762	-0.545054	-1.28916
Bradi1g39217	1	11.6092	3.94186	5.13752	3.29561	1.9706	0.777384		0.339547	0.44254	0.28388	0.169745	0.0669629		1.87285	-0.134432	0.178588	-0.303618	-0.650502	-0.962883
Bradi1g41940	1	73.9163	53.4814	45.7534	33.6894	38.1355	40.5301		0.72354	0.61899	0.455777	0.515929	0.548324		1.80541	0.404321	-0.125533	-0.95269	-0.647844	-0.483665
Bradi1g43710	1	124.357	89.3821	47.8658	135.163	89.2676	87.2667		0.718752	0.384905	1.08689	0.717831	0.701741		0.927907	-0.198691	-1.53598	1.27598	-0.20238	-0.266831
Bradi1g44170	1	258.59	69.2756	67.8755	23.4613	31.4336	16.709		0.267898	0.262483	0.090728	0.121558	0.0646159		1.97889	-0.0943478	-0.10968	-0.596073	-0.508766	-0.67002
Bradi1g44470	1	236.711	47.1268	11.2044	4.64753	11.8277	9.00556		0.19909	0.0473335	0.0196338	0.049967	0.0380445		2.01191	-0.069083	-0.46339	-0.535362	-0.456547	-0.487525
Bradi1g45000	1	23.0248	12.5483	8.94972	9.49083	10.4268	7.79561		0.544992	0.388699	0.4122	0.452851	0.338574		1.95677	0.0906624	-0.550336	-0.453952	-0.287231	-0.75591
Bradi1g45090	1	160.845	111.584	55.1257	80.0855	129.238	118.275		0.69374	0.342726	0.497906	0.803493	0.735338		1.38758	0.0642643	-1.45243	-0.781917	0.538497	0.244006
Bradi1g45530	1	64.7055	32.014	33.2961	38.8939	38.5529	20.9945		0.494764	0.51458	0.601091	0.595821	0.324462		1.8277	-0.416077	-0.328075	0.0561272	0.0327197	-1.1724
Bradi1g45535	1	36.6316	8.93413	13.1774	21.6298	17.8104	7.56808		0.243891	0.359729	0.590469	0.486203	0.2066		1.77424	-0.811313	-0.415202	0.373825	0.0172843	-0.938833
Bradi1g45790	1	14.3969	9.49987	8.8191	6.35376	7.7947	8.93582		0.659854	0.612568	0.441327	0.541414	0.620675		1.86539	0.0731391	-0.176013	-1.07829	-0.550927	-0.133296
Bradi1g46500	1	111.746	33.7127	38.7364	39.6863	39.3743	28.3407		0.30169	0.346647	0.355147	0.352355	0.253616		2.02099	-0.476446	-0.315663	-0.285262	-0.295248	-0.648376
Bradi1g46750	1	238.391	109.856	104.797	41.5535	39.3215	10.3378		0.460823	0.439602	0.174308	0.164945	0.043365		1.79377	0.232558	0.17111	-0.597057	-0.624168	-0.976208
Bradi1g48320	1	98.7803	37.0293	20.8035	45.3339	47.6535	19.4263		0.374865	0.210604	0.458937	0.482419	0.196662		1.86068	-0.269345	-0.829032	0.0171117	0.0971239	-0.876536
Bradi1g50110	1	141.579	39.802	21.343	14.539	15.3876	2.46368		0.281129	0.15075	0.102692	0.108685	0.0174014		1.98342	0.0119379	-0.345625	-0.477423	-0.460985	-0.711329
Bradi1g50120	1	249.948	61.5497	26.7165	12.6379	19.7139	8.43166		0.24625	0.106888	0.0505619	0.0788719	0.0337336		1.99894	-0.017301	-0.390085	-0.540754	-0.465026	-0.585769
Bradi1g50130	1	7.21128	0.643772	0.417089	0.144764	0.372066	0.271489		0.0892729	0.0578384	0.0200746	0.051595	0.0376478		2.03765	-0.309623	-0.390642	-0.487972	-0.406733	-0.44268
Bradi1g52030	1	6.99166	3.8124	3.33835	2.56918	1.38736	2.86259		0.545279	0.477476	0.367464	0.198431	0.409429		1.84103	0.167791	-0.0817052	-0.486514	-1.10851	-0.332097
Bradi1g53560	1	14.1013	9.07979	6.20757	7.29711	7.71639	2.79976		0.643898	0.440213	0.517479	0.547212	0.198546		1.67682	0.326205	-0.446327	-0.153276	-0.040504	-1.36291
Bradi1g53770	1	236.523	51.5192	30.4458	14.0983	15.2539	12.7303		0.217819	0.128723	0.0596063	0.0644922	0.0538229		2.01191	-0.0977947	-0.338107	-0.524528	-0.51135	-0.540127
Bradi1g57050	1	78.7128	39.5869	36.5587	41.2103	50.8369	21.3982		0.502929	0.464457	0.523553	0.645853	0.271851		1.77112	-0.267286	-0.425053	-0.18271	0.318822	-1.2149
Bradi1g57060	1	36.4652	21.3604	18.1058	24.1156	21.9022	13.5658		0.585774	0.496524	0.66133	0.600633	0.37202		1.79668	-0.158636	-0.579934	0.198023	-0.0884945	-1.16764
Bradi1g58830	1	157.315	100.913	69.7592	101.402	106.235	117.818		0.64147	0.443437	0.64458	0.675305	0.748931		1.69406	-0.279767	-1.37	-0.262645	-0.0934917	0.311845
Bradi1g61390	1	4.68875	2.4101	2.18262	5.16148	2.34069	2.86958		0.514018	0.465501	1.10082	0.499215	0.612015		1.08159	-0.662352	-0.836455	1.44339	-0.715475	-0.310693
Bradi1g61568	1	12.5224	6.91632	5.53423	4.13281	2.92418	6.14276		0.552315	0.441946	0.330033	0.233515	0.490541		1.84438	0.165926	-0.247867	-0.66745	-1.02931	-0.0656763
Bradi1g62400	1	51.4098	24.6087	16.6764	46.1727	29.0055	3.9234		0.478677	0.324382	0.898131	0.564202	0.0763161		1.27476	-0.225213	-0.669157	0.981656	0.0208617	-1.3829
Bradi1g62520	1	19.1551	16.7623	13.3077	15.2601	16.1031	7.71839		0.875086	0.694736	0.79666	0.840671	0.402943		1.13027	0.520787	-0.359171	0.138132	0.352871	-1.78288
Bradi1g62880	1	358.181	178.459	142.949	95.1805	98.8959	101.688		0.498236	0.399096	0.265733	0.276106	0.283901		1.9331	0.15712	-0.193782	-0.665818	-0.629104	-0.601513
Bradi1g63600	1	38.7058	15.9416	7.4819	16.3869	22.7765	14.2651		0.411867	0.193302	0.423372	0.588452	0.368551		1.81582	-0.309824	-1.09977	-0.268244	0.328395	-0.466378
Bradi1g63630	1	112.795	90.7155	53.645	85.5539	77.3548	47.8057		0.804249	0.475596	0.758488	0.685798	0.423827		1.43711	0.525743	-1.00439	0.31269	-0.0257396	-1.24542
Bradi1g64280	1	103.103	19.8187	7.95868	3.32953	3.33964	3.89905		0.192222	0.0771915	0.0322932	0.0323913	0.037817		2.01493	-0.0951639	-0.39565	-0.512935	-0.512679	-0.498505
Bradi1g64290	1	67.1562	16.3242	6.54418	2.46034	2.06335	1.7762		0.243078	0.0974471	0.0366361	0.0307246	0.0264487		1.99328	0.0105362	-0.370942	-0.530235	-0.54572	-0.556921
Bradi1g64710	1	12.4554	3.33984	0.77182	0.675652	0.903912	1.66934		0.268143	0.0619665	0.0542455	0.0725716	0.134025		1.99253	0.00809241	-0.550958	-0.571894	-0.522202	-0.355571
Bradi1g65520	1	95.2065	33.8127	14.644	5.72286	7.6534	7.30825		0.355151	0.153813	0.06011	0.0803874	0.0767621		1.94713	0.184374	-0.366004	-0.622149	-0.566719	-0.576629
Bradi1g65825	1	60.0507	29.9317	28.4051	58.1198	23.9003	25.3748		0.498441	0.473018	0.967845	0.398002	0.422556		1.33721	-0.459169	-0.550223	1.22204	-0.8189	-0.73096
Bradi1g65841	1	32.2623	18.9256	17.7212	16.4685	18.0711	10.0086		0.586615	0.549285	0.510456	0.56013	0.310227		1.83208	0.00219548	-0.163048	-0.334928	-0.115041	-1.22126
Bradi1g65870	1	10.9143	4.80492	5.6671	6.79319	6.90655	5.11464		0.440241	0.519236	0.622412	0.632798	0.468618		1.88527	-0.847842	-0.462134	0.0416367	0.0923504	-0.709283
Bradi1g66780	1	94.3658	42.0747	37.3419	24.6217	23.9658	21.8332		0.445868	0.395715	0.260918	0.253967	0.231368		1.94981	0.0499262	-0.122026	-0.584187	-0.608018	-0.685501
Bradi1g67365	1	13.4587	8.75588	6.41149	7.52654	12.6373	1.36608		0.650575	0.476384	0.559234	0.938971	0.101502		1.15268	0.0896379	-0.440298	-0.188246	0.967014	-1.58079
Bradi1g67883	1	13.6271	8.18855	9.87057	8.92429	11.3848	6.50151		0.600903	0.724336	0.654894	0.835455	0.477103		1.54754	-0.62296	0.0483337	-0.329326	0.65266	-1.29625
Bradi1g69400	1	110.138	59.5097	54.3318	63.7911	69.9631	56.3711		0.54032	0.493307	0.579193	0.635232	0.511823		1.96701	-0.454807	-0.702495	-0.250004	0.0452362	-0.604945
Bradi1g71430	1	20.2097	2.49493	1.33979	0.675306	0.435262	0.710866		0.123452	0.0662946	0.0334149	0.0215373	0.0351745		2.03198	-0.232104	-0.37974	-0.464666	-0.495346	-0.460121
Bradi1g71690	1	58.3196	42.8894	28.1867	41.0129	33.1505	20.1666		0.73542	0.483314	0.703245	0.568428	0.345795		1.58474	0.422089	-0.685747	0.280698	-0.311728	-1.29005
Bradi1g71740	1	9.43669	1.4325	1.06166	0.691268	0.852136	0.211975		0.151801	0.112503	0.0732532	0.0903002	0.0224629		2.02781	-0.240465	-0.345555	-0.450519	-0.404931	-0.586344
Bradi1g71920	1	150.331	66.2404	35.1346	14.2459	26.5564	17.5976		0.440631	0.233716	0.0947641	0.176654	0.117059		1.90468	0.281052	-0.319543	-0.722866	-0.485172	-0.658152
Bradi1g71960	1	100.082	54.741	8.27381	1.35038	5.38774	5.34601		0.546962	0.0826704	0.0134927	0.0538333	0.0534164		1.76924	0.637565	-0.522223	-0.695027	-0.594257	-0.595299
Bradi1g72440	1	22.4936	2.26728	1.78917	2.87711	1.31215	2.16823		0.100797	0.0795412	0.127908	0.0583343	0.0963934		2.03728	-0.385358	-0.442624	-0.312314	-0.49976	-0.397221
Bradi1g72449	1	232.159	149.335	66.0629	193.966	207.748	127.89		0.643245	0.284559	0.835487	0.894853	0.550872		1.13741	-0.221988	-1.58875	0.510541	0.736753	-0.573972
Bradi1g72590	1	203.907	71.1798	49.483	16.8189	13.256	14.1877		0.34908	0.242674	0.0824832	0.0650099	0.0695793		1.93542	0.131909	-0.162909	-0.606752	-0.655166	-0.642505
Bradi1g73230	1	92.7035	15.9135	5.25353	2.92586	6.61503	4.78875		0.171661	0.0566702	0.0315615	0.0713568	0.0516566		2.02406	-0.154725	-0.457185	-0.523228	-0.418554	-0.470372
Bradi1g74490	1	21.6198	12.77	10.5785	15.2291	19.1201	12.7367		0.590664	0.489297	0.704405	0.884379	0.589121		1.48132	-0.607011	-1.12416	-0.0267327	0.891456	-0.614879
Bradi1g74862	1	191.433	150.435	110.821	156.595	81.8713	101.674		0.785835	0.578903	0.818013	0.427676	0.531121		1.45028	0.447513	-0.521388	0.598174	-1.22946	-0.745112
Bradi1g74900	1	39.6841	11.5805	14.0297	7.02701	7.85024	5.53921		0.291816	0.353535	0.177074	0.197818	0.139583		1.97963	-0.210805	-0.0199056	-0.565706	-0.501543	-0.681667
Bradi1g75877	1	15.8268	13.3894	6.77847	9.1979	8.38329	10.1749		0.845994	0.428289	0.581158	0.529688	0.642892		1.54385	0.820424	-1.14168	-0.423601	-0.665373	-0.133616
Bradi1g76510	1	56.6844	19.6439	21.485	18.8711	21.8686	16.139		0.346548	0.379028	0.332916	0.385796	0.284717		2.02261	-0.401749	-0.281248	-0.452327	-0.256135	-0.631149
Bradi1g76760	1	133.005	124.513	67.8679	103.383	89.5092	62.1704		0.936155	0.510265	0.777288	0.672976	0.467429		1.24949	0.956901	-0.994864	0.228846	-0.249197	-1.19117
Bradi1g78057	1	6.49043	6.20388	4.07475	4.11466	6.04758	2.48904		0.95585	0.627809	0.633958	0.93177	0.383494		0.997489	0.817383	-0.520817	-0.495735	0.719151	-1.51747
Bradi2g00247	1	10.7788	5.09919	3.65171	4.54293	6.21212	7.67397		0.473076	0.338786	0.421469	0.576328	0.711951		1.72025	-0.474179	-1.03344	-0.6891	-0.0441758	0.520642
Bradi2g00280	1	64.1414	24.8613	20.6402	13.7027	18.6887	10.6149		0.387602	0.321792	0.213633	0.291367	0.165493		1.97269	-0.0295767	-0.244743	-0.598376	-0.34422	-0.755772
Bradi2g00740	1	114.284	41.5287	69.567	28.4069	17.6756	52.8922		0.363383	0.608722	0.248565	0.154664	0.462815		1.73743	-0.361488	0.447392	-0.740041	-1.04963	-0.0336612
Bradi2g02340	1	90.0534	34.2393	8.19654	1.23815	1.12071	0.647181		0.380211	0.0910187	0.013749	0.0124449	0.00718663		1.90191	0.328586	-0.405521	-0.601668	-0.604979	-0.618327
Bradi2g02846	1	9.40442	6.67877	5.64392	4.1815	5.61911	6.40647		0.710173	0.600135	0.444631	0.597496	0.681219		1.76935	0.204606	-0.389481	-1.22903	-0.403727	0.048283
Bradi2g03487	1	10.7345	4.15096	3.64558	6.77042	6.54559	5.72566		0.386693	0.339614	0.630716	0.609771	0.533388		1.76975	-0.835397	-1.03538	0.201139	0.112171	-0.21228
Bradi2g03694	1	273.411	190.435	174.186	238.731	154.521	88.6891		0.696515	0.637085	0.873158	0.56516	0.32438		1.33735	0.0581623	-0.192337	0.802711	-0.495499	-1.51038
Bradi2g04497	1	16.9154	7.58777	11.4726	11.2415	14.1633	8.12024		0.448571	0.678233	0.664573	0.837304	0.48005		1.50003	-1.12411	-0.0311943	-0.096203	0.725791	-0.974312
Bradi2g04570	1	31.7393	6.12765	2.64422	0.883946	0.436157	0.844034		0.193062	0.0833105	0.0278502	0.0137419	0.0265927		2.01066	-0.0804126	-0.364819	-0.508537	-0.545097	-0.511796
Bradi2g05050	1	40.9193	10.8305	3.53932	5.13155	5.17435	17.1681		0.264679	0.0864951	0.125407	0.126453	0.419559		1.90812	-0.208456	-0.721347	-0.609343	-0.606332	0.237356
Bradi2g05510	1	18.0059	7.55477	4.77401	3.18418	1.99168	0.437103		0.419571	0.265135	0.176841	0.110612	0.0242755		1.88558	0.245374	-0.191038	-0.440545	-0.627696	-0.871671
Bradi2g05832	1	108.381	48.7672	43.0964	19.0065	14.815	19.693		0.44996	0.397636	0.175367	0.136693	0.181701		1.87401	0.183578	0.0227737	-0.660325	-0.779181	-0.640859
Bradi2g05880	1	99.898	42.1117	51.0848	44.8642	25.6228	59.1585		0.421547	0.511369	0.4491	0.25649	0.592189		1.83074	-0.463691	-0.107413	-0.354403	-1.11839	0.213158
Bradi2g05920	1	20.1085	8.94021	3.74041	1.3988	1.58299	0.890089		0.444599	0.186011	0.0695627	0.0787225	0.0442644		1.87221	0.378507	-0.316944	-0.630124	-0.605489	-0.698161
Bradi2g06111	1	67.0145	40.5067	24.6752	54.2494	21.4352	51.0453		0.604447	0.368207	0.809518	0.319859	0.761705		1.34441	-0.149185	-1.04122	0.625158	-1.22378	0.444619
Bradi2g06836	1	7.75653	3.96174	6.14323	6.72158	5.48332	2.59969		0.510762	0.792008	0.866571	0.70693	0.335162		1.22691	-0.786717	0.370848	0.677739	0.0206795	-1.50946
Bradi2g06870	1	40.5202	18.741	11.7599	8.74852	10.0304	1.88185		0.46251	0.290223	0.215906	0.247541	0.0464423		1.86971	0.25636	-0.260785	-0.483858	-0.3889	-0.992524
Bradi2g08702	1	65.3279	43.3512	37.3024	36.9476	23.1813	29.0913		0.663593	0.571003	0.565571	0.354845	0.445311		1.78826	0.2841	-0.129894	-0.154181	-1.09639	-0.691892
Bradi2g10870	1	129.652	88.6125	61.7746	96.223	67.5238	104.018		0.683466	0.476466	0.742165	0.52081	0.802288		1.53994	-0.107935	-1.18558	0.197652	-0.954726	0.510649
Bradi2g11005	1	30.6886	18.9637	21.147	18.2971	20.4293	11.4743		0.61794	0.689085	0.596218	0.665696	0.373895		1.69691	-0.194004	0.15811	-0.301515	0.04235	-1.40185
Bradi2g16680	1	43.534	21.0896	23.8302	26.9771	18.6434	14.8691		0.484439	0.547393	0.619679	0.428249	0.341552		1.85817	-0.370873	-0.0986861	0.213844	-0.613809	-0.988647
Bradi2g17820	1	26.9107	9.9323	5.50228	2.21889	3.13011	3.25103		0.369083	0.204464	0.0824536	0.116315	0.120808		1.95068	0.152646	-0.316497	-0.66421	-0.567711	-0.554905
Bradi2g18070	1	20.3062	13.0776	13.7282	15.6299	20.505	9.72101		0.644021	0.676061	0.769713	1.00979	0.478721		1.13051	-0.567908	-0.41504	0.0317852	1.17722	-1.35657
Bradi2g18980	1	40.0825	21.9677	10.1387	6.49809	4.93933	1.31517		0.548062	0.252946	0.162118	0.123229	0.0328117		1.78241	0.536999	-0.276255	-0.526552	-0.633718	-0.882882
Bradi2g19900	1	8.16401	1.30405	0.661174	0.160724	0.420625	0.80586		0.159732	0.0809864	0.0196869	0.0515218	0.0987089		2.02525	-0.199571	-0.40807	-0.570375	-0.486084	-0.361145
Bradi2g20970	1	158.416	74.396	85.0939	54.5291	50.572	31.5189		0.469625	0.537156	0.344215	0.319236	0.198963		1.85176	-0.0304279	0.209224	-0.475479	-0.564126	-0.990948
Bradi2g21003	1	114.661	40.1292	47.6117	30.717	27.7796	7.5613		0.349981	0.415239	0.267894	0.242276	0.0659449		1.898	-0.125257	0.0778671	-0.380762	-0.4605	-1.00935
Bradi2g21060	1	316.104	104.256	92.5112	81.7486	83.1506	58.4123		0.329817	0.292661	0.258613	0.263049	0.184788		2.01573	-0.192194	-0.314606	-0.426776	-0.412164	-0.669993
Bradi2g21067	1	13.3147	2.70748	0.99789	0.787897	0.778724	0.439985		0.203346	0.0749467	0.0591751	0.0584862	0.0330451		2.01512	-0.0921044	-0.431731	-0.473449	-0.475271	-0.542565
Bradi2g21890	1	55.4784	32.7444	22.0498	16.1273	14.9957	10.1718		0.590218	0.397448	0.290695	0.270298	0.183346		1.80848	0.447861	-0.192203	-0.54666	-0.614384	-0.903094
Bradi2g22205	1	18.0156	0.652456	2.14674	1.88709	0.958834	0.54574		0.0362161	0.11916	0.104747	0.0532224	0.0302926		2.03196	-0.491518	-0.274346	-0.312082	-0.44699	-0.507027
Bradi2g22241	1	9.52999	2.33822	3.21142	3.2976	2.80023	7.23637		0.245354	0.336981	0.346024	0.293834	0.759327		1.63251	-0.816337	-0.519006	-0.489661	-0.659018	0.851516
Bradi2g22300	1	29.8667	16.1932	4.61874	1.78525	2.03327	2.42702		0.542182	0.154645	0.059774	0.0680781	0.0812618		1.78914	0.588718	-0.427426	-0.676184	-0.65441	-0.619842
Bradi2g22320	1	65.338	13.6153	12.3622	6.01407	6.66605	6.09908		0.208382	0.189204	0.0920455	0.102024	0.0933467		2.02024	-0.203527	-0.257402	-0.530333	-0.502301	-0.526678
Bradi2g24420	1	59.6195	45.0551	31.3988	53.5365	44.9219	23.2276		0.755711	0.526654	0.89797	0.753477	0.389598		1.22772	0.154405	-0.851985	0.779433	0.144588	-1.45416
Bradi2g24710	1	17.6709	12.7397	7.3628	6.91402	20.4143	7.24584		0.720942	0.416664	0.391267	1.15525	0.410045		0.952969	0.115748	-0.797137	-0.873331	1.41874	-0.816995
Bradi2g25850	1	43.1286	47.0181	20.8752	40.6788	42.531	5.8627		1.09018	0.484023	0.943197	0.986143	0.135935		0.599259	0.837595	-0.764358	0.449142	0.562638	-1.68428
Bradi2g26090	1	40.6877	25.5639	18.1746	21.2211	29.017	23.8312		0.628296	0.446686	0.52156	0.713165	0.585711		1.8045	-0.107726	-1.04202	-0.656828	0.328878	-0.326806
Bradi2g26107	1	98.0873	67.2023	61.8637	57.9783	53.8453	48.8959		0.685128	0.6307	0.591088	0.548953	0.498494		1.90443	0.145606	-0.158416	-0.37968	-0.615041	-0.896897
Bradi2g26280	1	58.4032	18.3191	5.16846	36.3512	25.4347	27.9644		0.313666	0.0884962	0.622417	0.435501	0.478816		1.6587	-0.572696	-1.30476	0.43111	-0.176587	-0.0357645
Bradi2g27050	1	200.938	32.7334	21.3048	10.6304	11.7518	12.0838		0.162903	0.106027	0.0529042	0.0584846	0.060137		2.02838	-0.205989	-0.357803	-0.499597	-0.484702	-0.480291
Bradi2g27880	1	43.3035	5.70307	7.04213	18.9826	34.1441	20.6179		0.1317	0.162623	0.438362	0.788484	0.476125		1.46051	-1.07353	-0.983284	-0.178568	0.843226	-0.0683605
Bradi2g29960	1	45.4277	46.2416	30.3789	26.6759	39.7267	21.703		1.01791	0.66873	0.587216	0.874504	0.477748		1.01523	1.09466	-0.453518	-0.814925	0.458821	-1.30027
Bradi2g32900	1	43.2531	19.3308	17.7781	18.5419	7.28959	6.09678		0.446922	0.411025	0.428684	0.168533	0.140956		1.83594	0.0460695	-0.0701031	-0.0129546	-0.854855	-0.944101
Bradi2g36720	1	18.3947	8.329	7.89512	6.93029	5.71291	6.43794		0.452795	0.429207	0.376756	0.310574	0.34999		1.99941	-0.13146	-0.223312	-0.427562	-0.68528	-0.531793
Bradi2g37160	1	154.681	103.273	118.143	117.365	94.7628	76.0124		0.667656	0.763788	0.758758	0.612636	0.491415		1.65114	-0.279086	0.27924	0.250026	-0.598642	-1.30268
Bradi2g37850	1	8.58894	5.37127	3.92154	5.14039	3.00617	3.95223		0.625371	0.456581	0.59849	0.350005	0.460154		1.82959	0.190751	-0.547636	0.0731572	-1.01386	-0.532005
Bradi2g38163	1	34.7995	11.7582	4.90967	1.05725	1.14675	1.56964		0.337884	0.141084	0.0303812	0.032953	0.0451052		1.94055	0.193456	-0.32583	-0.617937	-0.611151	-0.579085
Bradi2g38200	1	122.878	75.2893	56.2118	30.7243	43.8397	29.1081		0.612718	0.457461	0.25004	0.356775	0.236887		1.78427	0.440803	-0.0977734	-0.817311	-0.447051	-0.862938
Bradi2g38247	1	705.812	490.192	330.012	305.348	308.311	372.516		0.694508	0.467564	0.432619	0.436817	0.527783		1.83372	0.456613	-0.566418	-0.723941	-0.705017	-0.294958
Bradi2g38254	1	18.7097	16.1686	10.2634	8.45566	12.0583	3.07762		0.864182	0.548562	0.451941	0.644494	0.164493		1.2995	0.844287	-0.213555	-0.537393	0.107974	-1.50081
Bradi2g38974	1	30.5852	20.707	17.9938	19.1121	18.4183	14.7575		0.677025	0.588316	0.624879	0.602194	0.482505		1.90427	0.0820259	-0.418476	-0.212182	-0.340173	-1.01546
Bradi2g39220	1	91.1312	44.8832	34.0997	30.504	54.0629	37.8636		0.492511	0.374182	0.334726	0.593242	0.415485		1.89297	-0.173075	-0.654805	-0.815438	0.23701	-0.486659
Bradi2g41270	1	160.87	104.909	71.4305	65.8436	77.884	54.6316		0.652139	0.444028	0.409298	0.484144	0.339602		1.84064	0.402217	-0.458331	-0.60194	-0.292449	-0.890137
Bradi2g42870	1	48.4527	21.4212	17.6243	26.3555	13.1639	32.4806		0.442105	0.363742	0.543941	0.271686	0.670357		1.72885	-0.408057	-0.708211	-0.0179914	-1.06081	0.466219
Bradi2g44035	1	15.4843	5.91327	5.27078	10.3863	16.1065	4.5522		0.381889	0.340396	0.670765	1.04018	0.293988		1.12717	-0.712119	-0.835589	0.147479	1.24674	-0.973681
Bradi2g45550	1	121.192	99.3007	79.6664	90.7653	82.4356	58.313		0.819366	0.657356	0.748938	0.680207	0.481162		1.54738	0.50765	-0.424879	0.102262	-0.293354	-1.43906
Bradi2g46093	1	122.529	25.3796	16.777	14.7149	5.11617	9.04623		0.207131	0.136922	0.120092	0.0417546	0.073829		2.01655	-0.153715	-0.345892	-0.391959	-0.606387	-0.518592
Bradi2g46810	1	92.6097	13.7543	5.61081	3.95534	9.79231	10.3959		0.148518	0.0605855	0.0427097	0.105737	0.112255		2.0306	-0.259392	-0.495881	-0.543956	-0.374448	-0.35692
Bradi2g46930	1	32.7601	24.3122	15.4241	17.2233	21.9043	15.5559		0.742128	0.470821	0.52574	0.66863	0.474843		1.72436	0.464592	-0.860807	-0.592514	0.105533	-0.841161
Bradi2g47491	1	51.8193	5.05949	2.28171	1.20536	1.07626	0.286688		0.0976371	0.044032	0.0232608	0.0207695	0.00553246		2.03444	-0.25613	-0.392202	-0.444928	-0.451252	-0.48993
Bradi2g47501	1	8.35727	1.84854	1.51861	0.899669	0.628494	0.0298705		0.221189	0.181712	0.107651	0.0752032	0.00357419		1.99599	-0.118652	-0.225843	-0.426933	-0.515036	-0.709524
Bradi2g47510	1	39.4905	7.58178	7.44066	3.61793	3.11169	0.775913		0.19199	0.188417	0.0916153	0.078796	0.0196481		2.00736	-0.189666	-0.199382	-0.462591	-0.497448	-0.658275
Bradi2g48420	1	7.85033	4.21129	2.82094	6.14583	3.33203	2.39336		0.536447	0.35934	0.782875	0.424445	0.304873		1.59418	-0.116424	-0.769985	0.792943	-0.529734	-0.970977
Bradi2g48426	1	85.6148	42.4442	34.1951	45.3706	56.4227	67.3275		0.495758	0.399407	0.529938	0.659029	0.7864		1.61309	-0.678715	-1.11663	-0.523363	0.0633597	0.642265
Bradi2g48730	1	45.9623	12.1881	4.63076	5.9638	14.4942	3.4963		0.265175	0.100751	0.129754	0.315349	0.0760689		1.96412	-0.141378	-0.612504	-0.529402	0.00238608	-0.683226
Bradi2g49057	1	219.448	97.8322	51.0522	33.6072	30.287	40.368		0.445811	0.23264	0.153144	0.138015	0.183953		1.92204	0.260492	-0.37863	-0.61697	-0.662331	-0.524601
Bradi2g49320	1	110.923	32.9632	31.6456	55.227	53.0608	24.9366		0.297171	0.285292	0.497885	0.478356	0.224809		1.88213	-0.585437	-0.627142	0.119251	0.0506882	-0.839492
Bradi2g50950	1	6.07085	3.73699	1.84828	3.53809	3.27616	3.87611		0.615563	0.304452	0.582801	0.539654	0.63848		1.72193	0.00922817	-1.3768	-0.136731	-0.328953	0.111326
Bradi2g52336	1	156.618	64.2815	32.2623	13.2017	15.0115	9.16906		0.410436	0.205994	0.0842927	0.0958482	0.0585442		1.90569	0.27931	-0.284667	-0.620393	-0.588516	-0.691423
Bradi2g52370	1	31.7635	8.92074	10.1303	6.17314	5.27737	7.28998		0.280849	0.318928	0.194347	0.166145	0.229508		2.00926	-0.266138	-0.145654	-0.539831	-0.62906	-0.42858
Bradi2g52870	1	23.3533	14.6467	4.76633	4.4715	1.98846	0.970112		0.627179	0.204096	0.191471	0.0851467	0.0415406		1.7023	0.713373	-0.408869	-0.442357	-0.724388	-0.840055
Bradi2g53200	1	43.4589	16.7053	9.28779	7.09056	3.77096	14.5994		0.384394	0.213714	0.163155	0.0867707	0.335936		1.92556	0.0617586	-0.454988	-0.608058	-0.839319	-0.0849499
Bradi2g53620	1	134.878	84.9013	37.3592	68.1348	35.2824	39.4565		0.629467	0.276985	0.505158	0.261587	0.292534		1.75279	0.468527	-0.753174	0.0376743	-0.806543	-0.69928
Bradi2g54400	1	227.349	86.4077	25.4973	58.8993	51.223	68.5375		0.380067	0.112151	0.25907	0.225306	0.301464		1.95994	0.00123359	-0.845259	-0.381061	-0.487741	-0.247115
Bradi2g54430	1	11.9206	3.98849	2.91262	3.97246	0.975724	0.258942		0.334588	0.244335	0.333244	0.0818519	0.0217222		1.897	-0.00391044	-0.261739	-0.00775119	-0.725914	-0.897689
Bradi2g55310	1	106.168	41.4126	3.62372	7.5254	22.8613	2.01964		0.390068	0.034132	0.0708822	0.215332	0.0190231		1.89338	0.270878	-0.675962	-0.578201	-0.193943	-0.716154
Bradi2g55797	1	21.5122	7.38769	5.21148	5.28905	5.79943	2.09647		0.343418	0.242257	0.245863	0.269588	0.097455		1.97678	-0.0717981	-0.387428	-0.376178	-0.302153	-0.839219
Bradi2g55920	1	438.323	177.975	56.9142	23.4283	50.8385	26.394		0.406035	0.129845	0.0534499	0.115984	0.0602159		1.91071	0.302629	-0.445118	-0.651948	-0.482645	-0.63363
Bradi2g56520	1	58.5995	38.2069	19.4982	37.0338	29.8154	16.3858		0.652001	0.332738	0.631981	0.508799	0.279624		1.65899	0.324056	-0.900647	0.24726	-0.22527	-1.10439
Bradi2g56750	1	10.5682	6.47105	2.82301	3.58574	5.46582	4.9673		0.612311	0.267123	0.339294	0.517193	0.470022		1.79426	0.300485	-1.02953	-0.751453	-0.0660039	-0.247756
Bradi2g57100	1	553.041	164.718	229.625	411.055	412.021	177.945		0.29784	0.415205	0.743264	0.74501	0.321758		1.45331	-1.01861	-0.605428	0.549487	0.555635	-0.934403
Bradi2g57332	1	9.67343	4.65547	3.18819	1.0456	0.316389	0.0903695		0.481264	0.329583	0.10809	0.032707	0.00934203		1.78368	0.409198	0.00729137	-0.579594	-0.779334	-0.841244
Bradi2g57340	1	19.8411	11.2711	8.33083	6.79929	7.43521	2.63884		0.568066	0.419877	0.342686	0.374737	0.132998		1.79304	0.32328	-0.180972	-0.443632	-0.334571	-1.15715
Bradi2g57680	1	23.5812	7.55435	5.21538	3.64957	0.644852	0.800477		0.320355	0.221167	0.154767	0.0273461	0.0339456		1.9424	0.0753397	-0.19714	-0.379551	-0.72959	-0.71146
Bradi2g58152	1	20.2391	15.6981	6.35295	5.05029	10.7295	5.47227		0.775632	0.313894	0.249531	0.530137	0.270381		1.54881	0.819891	-0.68019	-0.889293	0.0223343	-0.821556
Bradi2g58590	1	27.0401	7.35138	8.41408	13.3792	12.6616	4.70628		0.27187	0.311171	0.494791	0.468254	0.174049		1.85988	-0.617481	-0.483765	0.140979	0.0506899	-0.950305
Bradi2g58760	1	19.3493	15.0872	11.417	8.81417	11.2662	13.4272		0.779727	0.590047	0.45553	0.582252	0.693938		1.66538	0.50603	-0.492296	-1.20029	-0.533323	0.0545047
Bradi2g59180	1	152.083	95.0247	62.1023	122.255	166.567	46.7459		0.624822	0.408346	0.803872	1.09524	0.307372		0.926295	-0.258214	-0.941673	0.307081	1.22698	-1.26047
Bradi2g59920	1	240.58	105.552	66.9401	39.3322	55.2303	69.21		0.438742	0.278245	0.16349	0.229572	0.28768		1.9501	0.127068	-0.394244	-0.766983	-0.55234	-0.363597
Bradi2g60331	1	16.4149	6.26306	4.88261	7.96014	5.29347	2.16982		0.381547	0.29745	0.484934	0.32248	0.132186		1.88308	-0.183392	-0.464391	0.162059	-0.380759	-1.0166
Bradi2g60340	1	40.124	13.1795	5.31425	17.0053	13.8749	3.27241		0.328469	0.132446	0.423819	0.345801	0.0815576		1.86976	-0.173027	-0.769328	0.117026	-0.120304	-0.924129
Bradi2g60660	1	23.6426	9.75406	9.84462	5.70883	5.80904	8.84787		0.412564	0.416394	0.241464	0.245703	0.374235		1.9601	-0.127318	-0.113707	-0.735309	-0.720248	-0.263517
Bradi2g60980	1	13.6135	5.20253	3.38884	0.595074	0.656409	0.286234		0.382161	0.248933	0.0437121	0.0482177	0.0210258		1.88802	0.24351	-0.111105	-0.657346	-0.645353	-0.71773
Bradi2g61767	1	20.0966	14.6934	11.5936	10.3204	10.0287	8.57823		0.731138	0.576891	0.513538	0.499026	0.42685		1.78266	0.506004	-0.226413	-0.527238	-0.596146	-0.938863
Bradi3g01527	1	68.5524	39.4959	44.7019	36.8846	31.1988	29.6014		0.576141	0.652083	0.538049	0.455109	0.431807		1.88215	-0.157468	0.207968	-0.340768	-0.739876	-0.852008
Bradi3g01640	1	16.7269	4.76202	6.22788	3.48618	3.26501	2.22466		0.284691	0.372327	0.208417	0.195194	0.132999		1.97306	-0.251652	0.0209061	-0.488877	-0.530001	-0.723438
Bradi3g02730	1	122.521	107.519	74.6761	89.6296	72.6069	56.2794		0.877551	0.609496	0.731545	0.592608	0.459344		1.44364	0.830363	-0.512165	0.0991025	-0.59675	-1.26419
Bradi3g04500	1	64.0085	56.253	28.773	30.1004	46.4265	28.1928		0.878836	0.449518	0.470256	0.725318	0.440454		1.39378	0.896018	-0.867701	-0.782502	0.265338	-0.904935
Bradi3g05050	1	12.0833	5.36206	6.6244	10.082	11.1137	8.56029		0.443758	0.548228	0.834371	0.919756	0.70844		1.18984	-1.37966	-0.897076	0.424734	0.819158	-0.156992
Bradi3g05660	1	83.8364	39.1294	23.0309	13.8752	4.78304	1.80114		0.466735	0.274713	0.165503	0.0570521	0.0214839		1.83137	0.371759	-0.153832	-0.452753	-0.749596	-0.846951
Bradi3g06070	1	694.579	330.51	287.496	204.898	199.886	117.256		0.475843	0.413914	0.294996	0.28778	0.168816		1.90153	0.120992	-0.0893765	-0.493335	-0.517847	-0.921963
Bradi3g06160	1	62.6296	35.0936	18.0222	30.5702	31.0971	33.8643		0.560336	0.287759	0.488112	0.496524	0.540707		1.85901	-0.00808585	-1.16562	-0.314794	-0.279071	-0.0914405
Bradi3g06790	1	11.0405	1.3	0.499172	0.337734	0.378742	0.179831		0.117748	0.0452126	0.0305904	0.0343047	0.0162882		2.03268	-0.229797	-0.415809	-0.453307	-0.443782	-0.489984
Bradi3g06800	1	20.0099	4.01124	0.501074	0.112373	0.105062	0.0901424		0.200462	0.0250413	0.00561585	0.00525047	0.00450489		2.00276	-0.0160335	-0.458965	-0.508013	-0.508936	-0.510818
Bradi3g08506	1	5.87655	3.59424	2.84294	3.64972	5.17021	2.74669		0.611623	0.483777	0.621064	0.879803	0.467398		1.49138	-0.303403	-0.894211	-0.259774	0.935916	-0.969903
Bradi3g08801	1	6.39885	4.35219	4.20421	3.85956	3.77014	2.80385		0.680152	0.657026	0.603164	0.58919	0.438181		1.81856	0.101295	-0.02287	-0.312053	-0.387082	-1.19785
Bradi3g09580	1	152.362	96.6069	80.5531	95.9263	64.5532	84.5863		0.634061	0.528695	0.629594	0.423683	0.555166		1.87939	0.0279672	-0.505118	0.00536666	-1.03641	-0.371191
Bradi3g10730	1	26.7175	13.0643	7.09707	17.0651	18.0257	6.58214		0.488977	0.265633	0.638724	0.674678	0.24636		1.57727	-0.223475	-1.01049	0.304204	0.430899	-1.07841
Bradi3g14570	1	8.09534	4.89319	3.56468	5.99832	5.3818	2.89191		0.604445	0.440337	0.74096	0.664802	0.357231		1.5982	-0.132029	-0.84987	0.465109	0.131981	-1.21339
Bradi3g14630	1	463.236	190.556	164.181	244.512	175.714	62.3477		0.411357	0.354422	0.527834	0.379319	0.134591		1.83206	-0.194759	-0.390799	0.206293	-0.305074	-1.14772
Bradi3g14970	1	8.44879	4.9804	3.95074	5.99799	5.61888	6.40205		0.589481	0.46761	0.709923	0.665051	0.757747		1.68204	-0.606707	-1.28617	0.0647911	-0.185382	0.331421
Bradi3g15627	1	161.517	116.095	73.2144	60.4511	60.6173	60.0322		0.718775	0.453292	0.37427	0.375299	0.371677		1.74664	0.657786	-0.370125	-0.676082	-0.672098	-0.686123
Bradi3g15720	1	21.2443	10.9481	12.177	9.71209	7.38066	14.1633		0.515343	0.573191	0.457163	0.347418	0.666686		1.79645	-0.344347	-0.0888262	-0.601339	-1.0861	0.324155
Bradi3g17935	1	265.265	79.8887	36.7257	9.42323	11.5412	4.81515		0.301165	0.138449	0.0355238	0.0435081	0.0181522		1.96063	0.118693	-0.310183	-0.581466	-0.560422	-0.627253
Bradi3g18070	1	53.621	9.98016	7.28895	1.31918	1.05017	0.366711		0.186124	0.135935	0.024602	0.019585	0.00683894		2.00461	-0.111059	-0.241527	-0.530936	-0.543978	-0.577111
Bradi3g18730	1	12.8284	7.4995	8.5608	10.4837	8.61815	5.97173		0.584602	0.667332	0.817228	0.671803	0.465509		1.60284	-0.624561	-0.180954	0.622803	-0.15698	-1.26315
Bradi3g19940	1	39.7405	10.7708	3.27131	12.9104	16.7917	5.68674		0.271029	0.0823168	0.324869	0.422534	0.143097		1.89506	-0.311628	-0.882884	-0.148648	0.146997	-0.698895
Bradi3g22707	1	11.9771	5.49266	2.235	1.96081	1.52303	2.33619		0.458596	0.186606	0.163713	0.127161	0.195055		1.91111	0.306483	-0.49965	-0.567502	-0.675834	-0.47461
Bradi3g23180	1	24.0439	3.46762	1.89252	0.225217	0.0908025	0.108527		0.14422	0.0787109	0.00936692	0.00377653	0.00451372		2.02055	-0.159315	-0.326183	-0.502818	-0.517058	-0.51518
Bradi3g23190	1	31.0156	3.04292	0.913053	0.43393	0.255825	0.168345		0.0981094	0.0294385	0.0139907	0.00824827	0.00542775		2.0335	-0.237802	-0.410741	-0.449644	-0.464106	-0.471209
Bradi3g28306	1	9.24434	5.01631	4.89139	7.78286	6.64834	1.60695		0.542636	0.529123	0.841905	0.719179	0.17383		1.26804	-0.318469	-0.365343	0.719637	0.293923	-1.59778
Bradi3g28598	1	40.3188	24.104	29.0161	33.6591	27.1216	16.1313		0.597836	0.719666	0.834823	0.672678	0.400095		1.44486	-0.519431	0.0756232	0.638088	-0.15388	-1.48526
Bradi3g28990	1	24.2478	9.18698	6.17036	7.7193	14.8367	13.0721		0.378879	0.254471	0.318351	0.611877	0.539104		1.77455	-0.507996	-0.965181	-0.730431	0.348244	0.0808132
Bradi3g29104	1	6.88822	4.69145	5.25056	4.26216	4.58077	2.90658		0.681083	0.762251	0.618761	0.665015	0.421963		1.63073	-0.0551309	0.373942	-0.384579	-0.140069	-1.42489
Bradi3g29620	1	24.4805	7.46725	3.72155	0.787406	1.32611	3.58943		0.305029	0.152021	0.0321646	0.0541702	0.146624		1.96881	0.0640266	-0.355338	-0.683841	-0.623528	-0.37013
Bradi3g30340	1	31.044	19.3601	21.0247	24.5935	20.1556	8.91818		0.623632	0.677253	0.792215	0.649258	0.287275		1.40557	-0.205332	0.0241711	0.516224	-0.0956504	-1.64499
Bradi3g30730	1	231.839	79.5461	56.1879	19.8692	14.1409	7.12455		0.343109	0.242357	0.0857027	0.0609944	0.0307306		1.92842	0.134608	-0.140521	-0.568307	-0.63578	-0.718423
Bradi3g31130	1	41.8825	30.4404	26.7555	32.8707	27.7192	19.8568		0.726804	0.638821	0.78483	0.661831	0.474107		1.63322	0.0709365	-0.432192	0.402762	-0.300608	-1.37412
Bradi3g31820	1	27.2996	11.0028	12.1985	15.9676	18.2401	12.1639		0.403038	0.446837	0.584904	0.668145	0.445569		1.82531	-0.841557	-0.645888	-0.0290902	0.34278	-0.651552
Bradi3g31850	1	46.3818	18.0026	15.8106	35.9604	34.7157	15.1952		0.388139	0.34088	0.775313	0.748478	0.327611		1.42764	-0.738483	-0.905791	0.6322	0.537198	-0.952766
Bradi3g32700	1	9.82172	4.67855	3.14019	4.13365	2.81438	3.93036		0.476348	0.319719	0.420868	0.286547	0.400171		1.96945	-0.0289832	-0.62673	-0.24071	-0.753325	-0.3197
Bradi3g33170	1	42.0336	22.0708	6.50802	4.32568	1.01752	10.3472		0.525075	0.154829	0.10291	0.0242073	0.246166		1.79852	0.50001	-0.512291	-0.654244	-0.869428	-0.262565
Bradi3g34610	1	6.63466	5.58794	4.18095	5.96346	5.25148	2.89051		0.842234	0.630167	0.898834	0.791522	0.435668		1.14964	0.373194	-0.670488	0.65175	0.123618	-1.62771
Bradi3g34727	1	349.841	205.421	104.912	195.456	43.9025	213.798		0.587184	0.299885	0.5587	0.125493	0.611128		1.56856	0.189675	-0.769959	0.094533	-1.35246	0.269653
Bradi3g35560	1	119.996	56.3603	54.2164	43.7839	58.3809	65.572		0.469686	0.45182	0.364879	0.486525	0.546454		1.97125	-0.3686	-0.447429	-0.831029	-0.294304	-0.0298869
Bradi3g35910	1	19.1486	11.8133	13.3595	15.434	12.3531	9.2436		0.616925	0.697674	0.80601	0.645116	0.482729		1.64234	-0.512807	-0.0585189	0.550972	-0.354207	-1.26778
Bradi3g36710	1	78.3712	53.6507	46.5868	57.4887	56.166	35.2029		0.684572	0.594438	0.733543	0.716666	0.449181		1.66815	-0.0649909	-0.560238	0.204086	0.111355	-1.35836
Bradi3g36820	1	10.1168	3.92978	2.93908	3.99025	2.78144	2.24431		0.388442	0.290515	0.394418	0.274933	0.221841		1.98489	-0.138601	-0.478627	-0.117849	-0.532734	-0.717084
Bradi3g37040	1	93.816	47.9031	35.7956	84.0014	66.4436	78.9621		0.510607	0.381551	0.895385	0.708233	0.84167		1.16585	-0.893246	-1.43624	0.72569	-0.0617419	0.499686
Bradi3g37150	1	8.05728	4.17175	3.726	3.87528	5.15579	6.18727		0.517762	0.462438	0.480967	0.639891	0.767911		1.70259	-0.60912	-0.874325	-0.785505	-0.023665	0.590022
Bradi3g37486	1	29.6952	17.7091	16.5515	21.5805	14.1534	18.2363		0.596363	0.55738	0.726732	0.476623	0.614116		1.83191	-0.354899	-0.566097	0.351412	-1.00362	-0.258713
Bradi3g37595	1	7.33545	4.10296	3.02838	2.92584	3.03169	4.56773		0.559333	0.412842	0.398864	0.413294	0.622693		1.87259	-0.0368494	-0.671606	-0.732175	-0.669648	0.237691
Bradi3g37940	1	109.618	59.5731	23.6217	35.2926	27.2023	67.212		0.54346	0.215491	0.321959	0.248155	0.613147		1.71757	0.178929	-0.926399	-0.567575	-0.816312	0.413788
Bradi3g38140	1	16.9352	0.442968	0.0174615	0.0320284	0	0		0.0261567	0.00103108	0.00189124	0	0		2.0406	-0.358019	-0.419905	-0.417786	-0.422444	-0.422444
Bradi3g38980	1	66.3086	28.13	19.1543	18.0906	21.1624	22.6511		0.424228	0.288866	0.272825	0.31915	0.341601		2.00392	-0.0605372	-0.545887	-0.603402	-0.437298	-0.3568
Bradi3g39110	1	164.444	105.346	52.8433	48.7025	78.799	95.7567		0.640619	0.321346	0.296165	0.479185	0.582308		1.72995	0.338255	-0.898122	-0.995634	-0.286893	0.112445
Bradi3g39850	1	646.88	325.098	210.761	227.363	222.738	198.575		0.502562	0.325811	0.351477	0.344326	0.306974		1.9706	0.114562	-0.544932	-0.449167	-0.475846	-0.615215
Bradi3g41596	1	16.0398	6.51558	5.16211	7.23525	9.60512	12.127		0.406212	0.32183	0.45108	0.598828	0.756052		1.62275	-0.721703	-1.05487	-0.544552	0.0388041	0.65957
Bradi3g41600	1	290.654	222.53	149.193	137.485	198.506	171.821		0.765617	0.513301	0.473019	0.682963	0.591155		1.69765	0.488193	-0.813799	-1.02166	0.0616842	-0.412061
Bradi3g41770	1	10.0755	4.62996	2.36117	0.241194	0.389336	1.27587		0.459528	0.234348	0.0239387	0.0386419	0.126631		1.84281	0.391256	-0.213515	-0.778615	-0.739126	-0.502813
Bradi3g42400	1	88.7271	22.0949	20.3583	43.8511	28.2118	6.21611		0.24902	0.229448	0.494225	0.317961	0.0700587		1.85238	-0.44109	-0.500862	0.307755	-0.230546	-0.987632
Bradi3g43965	1	5.63887	4.24294	4.54688	3.40883	5.48797	2.14329		0.752444	0.806345	0.604523	0.973238	0.380091		1.05713	-0.00140789	0.22907	-0.633914	0.942696	-1.59357
Bradi3g44370	1	20.5763	16.4279	12.6022	10.261	15.033	15.5229		0.798388	0.612461	0.49868	0.730596	0.754404		1.56878	0.386751	-0.70331	-1.3704	-0.010703	0.128881
Bradi3g44820	1	673.533	499.91	383.305	514.418	550.599	219.496		0.742221	0.569096	0.76376	0.817479	0.325888		1.28568	0.169503	-0.580118	0.262767	0.495369	-1.6332
Bradi3g45403	1	734.046	223.285	343.629	265.956	220.279	72.0373		0.304184	0.468129	0.362316	0.300089	0.0981372		1.87797	-0.383354	0.149453	-0.194431	-0.39666	-1.05298
Bradi3g46030	1	201.805	48.625	17.9012	7.68491	6.00622	3.60092		0.240951	0.0887055	0.0380809	0.0297625	0.0178436		1.99334	0.0132005	-0.383963	-0.516028	-0.537728	-0.568821
Bradi3g47370	1	98.1149	88.5148	59.978	54.634	91.3086	41.0888		0.902154	0.611304	0.556837	0.930629	0.418782		1.10618	0.695241	-0.526309	-0.755066	0.814833	-1.33488
Bradi3g48447	1	156.127	117.73	118.09	158.434	136.416	65.4105		0.754061	0.75637	1.01477	0.873746	0.418956		0.897904	-0.222966	-0.212446	0.965223	0.322501	-1.75022
Bradi3g48470	1	49.8257	43.4301	25.8991	28.5233	30.4052	23.9306		0.87164	0.519795	0.572461	0.610231	0.480286		1.54237	0.931822	-0.741734	-0.491226	-0.311574	-0.929656
Bradi3g49020	1	55.9996	14.5368	6.31219	4.87199	7.83629	3.09957		0.259587	0.112718	0.0870003	0.139935	0.0553498		2.00247	-0.0447323	-0.450815	-0.521925	-0.375564	-0.609437
Bradi3g49350	1	42.207	10.5469	8.26738	39.6243	34.8826	3.6905		0.249884	0.195877	0.938809	0.826464	0.087438		1.08595	-0.723223	-0.853481	0.938366	0.667407	-1.11502
Bradi3g51777	1	54.9033	23.6768	11.4904	6.86537	7.72057	11.9038		0.431245	0.209284	0.125045	0.140621	0.216814		1.92907	0.231101	-0.431545	-0.683034	-0.636531	-0.409064
Bradi3g51810	1	51.0336	8.39279	2.37004	2.08894	2.26632	0.692635		0.164456	0.0464408	0.0409327	0.0444083	0.0135721		2.02225	-0.139298	-0.444603	-0.458853	-0.449861	-0.529634
Bradi3g52020	1	6.93143	2.82694	1.1426	0.675142	0.880344	1.45782		0.407843	0.164843	0.097403	0.127008	0.21032		1.93429	0.212994	-0.493365	-0.689402	-0.603347	-0.361171
Bradi3g52080	1	86.6918	53.8417	36.7339	28.2981	23.1667	16.2951		0.62107	0.42373	0.326423	0.26723	0.187966		1.76875	0.501604	-0.158305	-0.483703	-0.681643	-0.946704
Bradi3g52358	1	63.0817	41.6614	37.7254	65.0563	28.9724	36.3754		0.660436	0.598041	1.0313	0.459284	0.57664		1.17449	-0.2547	-0.517312	1.30624	-1.10133	-0.607388
Bradi3g53790	1	202.922	123.283	90.9832	177.803	162.481	12.0786		0.607538	0.448366	0.876215	0.800706	0.0595234		1.07516	-0.0716489	-0.536765	0.713447	0.492805	-1.673
Bradi3g53830	1	16.2935	9.93656	8.57706	9.07109	9.54697	5.01166		0.609847	0.526409	0.55673	0.585937	0.307586		1.78801	0.053766	-0.317119	-0.182342	-0.0525175	-1.28979
Bradi3g54470	1	62.9249	29.0615	30.3117	32.6889	43.2629	24.877		0.461843	0.481712	0.51949	0.687532	0.395344		1.83423	-0.57915	-0.490046	-0.32063	0.43296	-0.877367
Bradi3g55310	1	24.223	10.0099	10.023	15.521	18.5671	16.7553		0.413238	0.413781	0.640756	0.766508	0.69171		1.54698	-1.07898	-1.07655	-0.0607592	0.502024	0.16728
Bradi3g56801	1	8.83274	1.06901	0.101731	0.193006	0.163371	0.0155798		0.121028	0.0115175	0.0218513	0.0184961	0.00176386		2.02886	-0.188572	-0.464839	-0.43877	-0.447234	-0.489445
Bradi3g57230	1	206.018	126.095	103.66	77.4666	95.6326	85.1107		0.612056	0.503161	0.376018	0.464195	0.413122		1.90818	0.220287	-0.253502	-0.806684	-0.423037	-0.645248
Bradi3g58107	1	29.3676	20.6619	16.2356	15.0518	17.9615	14.0139		0.70356	0.55284	0.51253	0.611608	0.477188		1.85746	0.315292	-0.468802	-0.678509	-0.163075	-0.862369
Bradi3g59420	1	167.966	0.381859	11.0104	5.44303	4.67206	0.418276		0.00227343	0.0655514	0.0324056	0.0278156	0.00249025		2.03773	-0.467389	-0.308509	-0.391732	-0.403257	-0.466845
Bradi3g59530	1	26.5067	15.1895	10.7117	11.8675	17.6254	4.2776		0.573044	0.404112	0.447716	0.66494	0.161378		1.62256	0.110424	-0.487873	-0.333445	0.43589	-1.34755
Bradi3g59760	1	116.663	61.2686	26.3559	8.94066	10.1426	16.8947		0.525177	0.225915	0.0766369	0.0869397	0.144816		1.81545	0.502906	-0.32434	-0.736989	-0.708509	-0.548521
Bradi3g60360	1	96.4836	14.0076	11.6974	6.75337	9.15589	8.79979		0.145182	0.121237	0.069995	0.0948958	0.0912051		2.03608	-0.296227	-0.361558	-0.501367	-0.433427	-0.443497
Bradi4g00747	1	30.519	3.38776	4.21699	3.69163	4.41543	1.26086		0.111005	0.138176	0.120962	0.144678	0.0413138		2.03074	-0.406756	-0.332257	-0.379456	-0.314429	-0.597838
Bradi4g03160	1	180.089	99.0419	79.8045	108.281	102.157	67.1773		0.54996	0.443138	0.601262	0.567258	0.373022		1.87942	-0.179058	-0.667658	0.0555983	-0.099934	-0.988368
Bradi4g03220	1	128.41	43.8335	49.2057	99.1432	124.472	42.1743		0.341356	0.383193	0.772084	0.969332	0.328436		1.15398	-0.913653	-0.782318	0.438501	1.0577	-0.954214
Bradi4g05484	1	7.43172	2.54611	2.8158	2.73331	3.0017	2.90639		0.342601	0.37889	0.367789	0.403904	0.391078		2.03436	-0.541055	-0.39889	-0.442376	-0.300896	-0.35114
Bradi4g06000	1	764.42	285.974	179.419	128.453	133.804	104.983		0.374105	0.234713	0.16804	0.17504	0.137337		1.97369	0.0784252	-0.343666	-0.545557	-0.524362	-0.638527
Bradi4g06515	1	22.7188	5.07912	1.53843	0.594799	0.613942	0.423797		0.223565	0.0677162	0.0261809	0.0270235	0.018654		1.99987	-0.0093815	-0.412685	-0.52017	-0.517989	-0.539648
Bradi4g07880	1	277.317	164.659	103.376	148.317	229.645	173.122		0.593757	0.372771	0.534829	0.828096	0.624277		1.53232	-0.292937	-1.28583	-0.5577	0.759954	-0.155809
Bradi4g08640	1	159.433	44.7308	60.6041	115.698	157.275	25.7958		0.280562	0.380123	0.725685	0.986464	0.161797		1.12513	-0.844867	-0.572245	0.37399	1.08806	-1.17007
Bradi4g10550	1	32.7711	18.1929	15.7823	13.7008	14.42	12.131		0.555152	0.481592	0.418075	0.440021	0.370174		1.96582	0.0473644	-0.26987	-0.543792	-0.449149	-0.750368
Bradi4g10570	1	12.6428	3.44743	0.616148	0.321665	0.477282	0.15375		0.272679	0.0487351	0.0254426	0.0377513	0.0121611		1.97593	0.102722	-0.474045	-0.534034	-0.502333	-0.56824
Bradi4g15190	1	42.9401	20.347	13.7682	2.73283	2.60323	5.08372		0.473847	0.320638	0.0636429	0.0606246	0.118391		1.82146	0.370435	-0.0520838	-0.760824	-0.769148	-0.60984
Bradi4g16740	1	23.4147	17.0211	8.75993	8.61594	9.47276	1.88492		0.726941	0.374122	0.367972	0.404566	0.0805017		1.57489	0.727776	-0.366783	-0.385861	-0.272336	-1.27769
Bradi4g16750	1	5.53285	3.95375	1.65561	1.35587	1.70408	0.199124		0.714595	0.299233	0.245058	0.307993	0.0359894		1.59856	0.792756	-0.379964	-0.532922	-0.355231	-1.1232
Bradi4g20690	1	14.8979	7.15175	6.37145	6.07851	6.99548	2.32767		0.480052	0.427675	0.408012	0.469562	0.156242		1.8427	-0.0368921	-0.226231	-0.297313	-0.0748113	-1.20745
Bradi4g23640	1	225.197	49.9069	91.994	75.794	93.8454	95.9528		0.221614	0.408505	0.336568	0.416726	0.426084		1.95759	-0.907963	-0.219944	-0.484774	-0.189679	-0.155228
Bradi4g23887	1	10.0086	6.73486	4.0564	2.98434	4.91856	6.48835		0.67291	0.405293	0.298179	0.491435	0.64828		1.66998	0.350522	-0.729022	-1.16111	-0.381531	0.251166
Bradi4g24735	1	13.3313	9.32585	6.48146	4.03894	6.10929	7.30691		0.699547	0.486184	0.302967	0.458267	0.548103		1.72747	0.484265	-0.398578	-1.15669	-0.514092	-0.142375
Bradi4g25910	1	18.8595	11.6759	9.04274	10.902	5.64558	10.6652		0.619101	0.479478	0.578061	0.299349	0.565507		1.77522	0.124997	-0.479909	-0.0528037	-1.26031	-0.107196
Bradi4g27621	1	6.18989	2.80859	2.95864	3.82666	5.03366	5.70752		0.453738	0.477979	0.618211	0.813207	0.922071		1.2355	-1.12598	-1.02118	-0.414963	0.428	0.898617
Bradi4g27830	1	32.4168	18.1047	13.8942	10.9182	13.9813	16.8876		0.558497	0.428612	0.336807	0.431298	0.520951		1.92667	0.0529224	-0.498314	-0.887934	-0.486915	-0.106425
Bradi4g28340	1	6.38034	2.54019	2.36692	4.18053	3.49421	5.28651		0.398128	0.370971	0.655221	0.547652	0.828563		1.48536	-0.953407	-1.06345	0.0883269	-0.34754	0.790703
Bradi4g28756	1	61.1512	37.6824	45.2809	49.8476	46.4611	30.2665		0.616218	0.740475	0.815153	0.759774	0.494946		1.5192	-0.704122	0.015721	0.448348	0.127526	-1.40667
Bradi4g29360	1	10.003	3.1342	1.46746	2.05893	2.76059	1.56665		0.313328	0.146703	0.205832	0.275977	0.156619		1.99945	-0.111973	-0.62432	-0.442506	-0.22682	-0.59383
Bradi4g29770	1	47.9285	28.6874	33.7852	44.2994	38.3069	15.9902		0.598547	0.704909	0.924283	0.799252	0.333625		1.13374	-0.532046	-0.090709	0.819563	0.30076	-1.63131
Bradi4g29792	1	59.8533	24.7695	23.1588	22.3364	14.1404	2.00898		0.413837	0.386927	0.373185	0.236252	0.0335651		1.83464	0.0202519	-0.063045	-0.105581	-0.529439	-1.15683
Bradi4g29830	1	183.582	116.318	113.076	141.391	75.4285	67.2016		0.633601	0.61594	0.770177	0.41087	0.366057		1.56757	0.00353047	-0.0718607	0.58653	-0.94724	-1.13853
Bradi4g30060	1	326.93	209.4	137.867	156.011	65.8616	23.3501		0.640505	0.421701	0.477202	0.201455	0.0714224		1.61169	0.521141	-0.142618	0.0257474	-0.81075	-1.20521
Bradi4g30100	1	416.355	175.143	164.145	36.6637	30.304	15.7462		0.420659	0.394243	0.0880587	0.072784	0.0378191		1.8135	0.232185	0.160083	-0.675648	-0.717341	-0.812777
Bradi4g30290	1	69.9923	51.1296	31.368	44.688	66.1099	37.9328		0.730504	0.448164	0.63847	0.944531	0.541957		1.28747	0.0602582	-1.22544	-0.358838	1.03488	-0.798333
Bradi4g30380	1	27.1719	13.3262	6.67835	10.5373	17.6242	10.4286		0.490442	0.245781	0.3878	0.648618	0.3838		1.76913	-0.133011	-1.04631	-0.516161	0.457447	-0.531094
Bradi4g30690	1	16.6312	12.7027	9.42364	8.20087	10.5292	11.8432		0.763787	0.566625	0.493103	0.633099	0.712111		1.71088	0.386782	-0.718419	-1.13055	-0.345799	0.0971061
Bradi4g31150	1	217.075	137.442	106.541	143.744	141.949	163.052		0.633155	0.490803	0.662187	0.653916	0.75113		1.77404	-0.384719	-1.22241	-0.213878	-0.262549	0.309521
Bradi4g31660	1	22.6621	6.37457	2.33247	0.69174	0.345194	0.140335		0.281288	0.102923	0.030524	0.0152322	0.00619248		1.96769	0.108462	-0.352947	-0.540236	-0.579795	-0.603179
Bradi4g31670	1	75.139	19.8168	6.56712	2.58913	1.6728	1.00475		0.263736	0.0873997	0.0344578	0.0222627	0.0133719		1.98044	0.0697175	-0.387902	-0.525295	-0.556943	-0.580016
Bradi4g31920	1	5.63448	3.68463	4.2034	2.48916	3.65527	3.51466		0.653943	0.746015	0.441774	0.648733	0.623777		1.71394	-0.173218	0.328876	-1.33024	-0.201629	-0.337721
Bradi4g33130	1	171.67	89.6447	89.1334	67.6703	91.4067	123.314		0.522193	0.519215	0.394189	0.532458	0.718322		1.78913	-0.427804	-0.441624	-1.02172	-0.38018	0.482197
Bradi4g33260	1	8.80563	5.83441	5.22552	6.49687	8.17516	3.94387		0.662577	0.593429	0.737809	0.928401	0.44788		1.30972	-0.317112	-0.650495	0.045607	0.964519	-1.35224
Bradi4g33970	1	11.9779	0.8257	0.715269	0.128605	0.181605	0.120163		0.0689355	0.0597159	0.0107369	0.0151617	0.0100321		2.03687	-0.316339	-0.339641	-0.463432	-0.452249	-0.465213
Bradi4g34240	1	337.485	188.287	108.92	211.566	263.484	95.1916		0.557912	0.322741	0.626891	0.780726	0.282061		1.48267	-0.135997	-0.997058	0.116564	0.679818	-1.146
Bradi4g34481	1	16.4976	11.0646	6.94911	9.70085	7.33127	4.02172		0.670683	0.42122	0.588016	0.444384	0.243777		1.68402	0.419748	-0.537955	0.102387	-0.449026	-1.21917
Bradi4g34630	1	7.38659	3.10483	2.95239	2.91701	3.68732	1.30563		0.420333	0.399695	0.394906	0.499191	0.176757		1.87977	-0.223028	-0.297892	-0.315266	0.0630368	-1.10662
Bradi4g35230	1	19.585	11.0079	4.49346	9.42408	6.27491	10.0953		0.562059	0.229434	0.481189	0.320394	0.51546		1.80112	0.164334	-1.07884	-0.137913	-0.738879	-0.00982612
Bradi4g35356	1	11.2561	4.6932	2.8989	0.739999	1.84415	3.09846		0.416946	0.25754	0.065742	0.163835	0.275269		1.91038	0.161177	-0.317054	-0.892464	-0.598176	-0.263867
Bradi4g35650	1	69.3426	14.1553	1.97138	1.44768	1.76388	0.757832		0.204136	0.0284296	0.0208772	0.0254372	0.0109288		2.00512	-0.0276669	-0.476455	-0.495745	-0.484098	-0.521155
Bradi4g35740	1	149.892	115.955	94.512	96.8648	88.2685	69.3082		0.773586	0.630532	0.646228	0.588878	0.462386		1.71426	0.487539	-0.287537	-0.202491	-0.513216	-1.19856
Bradi4g35940	1	102.661	49.3488	56.3574	68.5464	87.6649	31.6479		0.480698	0.548968	0.6677	0.85393	0.308277		1.41063	-0.642818	-0.372862	0.0966317	0.833032	-1.32461
Bradi4g41040	1	376.093	261.77	138.765	156.978	144.682	145.042		0.696025	0.368964	0.417392	0.384698	0.385655		1.78732	0.600758	-0.675921	-0.486882	-0.614505	-0.61077
Bradi4g42540	1	16.9534	5.61457	1.86651	1.57539	0.0736182	0.605221		0.331177	0.110097	0.092925	0.00434239	0.0356991		1.94559	0.181479	-0.40165	-0.446943	-0.680591	-0.597884
Bradi4g42620	1	50.2313	25.6038	16.1564	27.1483	27.9744	34.5966		0.509718	0.32164	0.540466	0.556911	0.688746		1.74517	-0.409586	-1.23618	-0.274454	-0.202177	0.377227
Bradi4g43314	1	365.424	267.25	174.08	111.44	195.576	79.7691		0.731343	0.476377	0.304961	0.535204	0.218292		1.58939	0.652242	-0.237154	-0.835103	-0.0319499	-1.13743
Bradi4g43500	1	25.2032	18.3266	13.663	12.4791	12.5748	10.4446		0.727153	0.542113	0.495139	0.498936	0.414416		1.78847	0.527677	-0.327374	-0.544437	-0.526892	-0.917449
Bradi4g45200	1	29.0471	13.5856	12.9147	13.175	20.0845	13.502		0.46771	0.44461	0.453572	0.691445	0.464831		1.85165	-0.534986	-0.638561	-0.598376	0.468174	-0.547898
Bradi5g00720	1	14.2703	9.96746	12.4211	10.129	14.9632	7.05775		0.698477	0.870419	0.709799	1.04856	0.494577		0.939567	-0.503187	0.319537	-0.449009	1.17192	-1.47882
Bradi5g01410	1	370.232	196.41	177.299	135.092	92.468	131.597		0.530505	0.478887	0.364883	0.249757	0.355445		1.89443	0.127666	-0.0665788	-0.495588	-0.928823	-0.531108
Bradi5g03550	1	10.4846	4.63216	5.53328	5.80902	5.19726	6.92697		0.441808	0.527755	0.554054	0.495706	0.660683		1.90567	-0.845362	-0.421777	-0.292159	-0.579727	0.233356
Bradi5g05110	1	123.081	38.3324	15.2682	0.0965943	0.181829	0.355983		0.311441	0.124051	0.000784804	0.00147731	0.00289227		1.94082	0.18219	-0.296418	-0.611248	-0.609479	-0.605865
Bradi5g07855	1	203.195	157.229	156.986	156.425	183.157	100.734		0.773784	0.77259	0.769826	0.901388	0.495749		1.26386	-0.0693836	-0.0764176	-0.0927058	0.682673	-1.70803
Bradi5g08840	1	10.9165	7.81046	5.41579	9.10181	7.22398	7.29383		0.715472	0.49611	0.833765	0.661748	0.668147		1.57896	-0.0800875	-1.35916	0.609664	-0.393344	-0.356032
Bradi5g13010	1	42.2542	27.8594	23.189	23.1831	24.93	17.847		0.659328	0.548797	0.548659	0.590001	0.422372		1.87954	0.157394	-0.401356	-0.402056	-0.193067	-1.04046
Bradi5g14870	1	321.092	378.234	174.988	261.547	361.502	129.329		1.17796	0.544977	0.814557	1.12585	0.402781		0.492063	1.05468	-0.946467	-0.0942058	0.889938	-1.39601
Bradi5g15760	1	423.102	262.31	226.079	187.838	232.062	121.442		0.61997	0.534336	0.443956	0.548478	0.287029		1.79127	0.199667	-0.158975	-0.537497	-0.0997458	-1.19472
Bradi5g15970	1	137.074	90.2168	52.0855	44.7255	50.8452	77.3092		0.658161	0.379981	0.326287	0.370932	0.563996		1.76434	0.424393	-0.666025	-0.876496	-0.701496	0.055282
Bradi5g16310	1	12.769	6.21807	3.54731	1.5764	0.554049	0.0906734		0.486965	0.277806	0.123455	0.0433901	0.00710104		1.80255	0.436325	-0.120671	-0.531713	-0.744927	-0.841566
Bradi5g16390	1	5.93181	3.27389	2.79518	6.40291	2.166	1.51862		0.551921	0.471219	1.07942	0.365151	0.256013		1.11422	-0.201768	-0.438783	1.34746	-0.7503	-1.07083
Bradi5g16940	1	39.8447	34.3257	15.8144	30.0089	40.1788	25.6688		0.861488	0.396902	0.753145	1.00839	0.644221		0.952685	0.359996	-1.62796	-0.103601	0.988568	-0.569688
Bradi5g16950	1	8.11202	5.45117	5.65428	3.48737	4.74181	4.15745		0.671987	0.697025	0.429901	0.584542	0.512506		1.76745	0.114213	0.240408	-1.10594	-0.326529	-0.689601
Bradi5g17480	1	339.989	230.293	143.497	301.378	209.332	69.4015		0.677354	0.422064	0.886435	0.615702	0.204129		1.24767	0.146948	-0.72399	0.860239	-0.0633819	-1.46749
Bradi5g17500	1	238.279	40.9343	34.6743	64.2653	61.1229	41.5777		0.171791	0.14552	0.269706	0.256518	0.174491		2.0177	-0.500263	-0.580136	-0.202578	-0.242673	-0.492055
Bradi5g18605	1	11.3235	2.97613	4.13973	5.0849	3.91984	2.2647		0.262827	0.365587	0.449057	0.346168	0.2		1.94864	-0.604079	-0.248239	0.0408048	-0.315483	-0.82164
Bradi5g19180	1	48.4741	20.1171	16.6552	17.7193	17.1403	19.398		0.415008	0.343591	0.365541	0.353598	0.400173		2.02951	-0.252129	-0.530678	-0.445066	-0.491648	-0.309991
Bradi5g19320	1	50.3852	33.9202	23.1257	25.7171	14.1274	30.7553		0.673217	0.458978	0.510409	0.280388	0.610404		1.69306	0.347252	-0.535065	-0.323251	-1.27056	0.0885625
Bradi5g20760	1	124.282	98.7857	54.5031	71.9629	73.6481	63.5893		0.79485	0.438543	0.579028	0.592588	0.511653		1.67204	0.684148	-1.03164	-0.355134	-0.289838	-0.679579
Bradi5g21250	1	212.014	44.5293	23.0956	10.9333	28.0537	19.7246		0.21003	0.108934	0.0515687	0.13232	0.0930345		2.01982	-0.153963	-0.43215	-0.590005	-0.367799	-0.475903
Bradi5g23135	1	33.2517	7.25554	2.38506	2.07398	3.1887	2.28813		0.2182	0.0717273	0.0623722	0.0958959	0.0688125		2.01565	-0.0934342	-0.488579	-0.513817	-0.423379	-0.496442
Bradi5g23166	1	107.189	56.1146	30.2909	84.7615	56.7402	27.2553		0.52351	0.282593	0.790766	0.529346	0.254273		1.5073	-0.13777	-0.969529	0.784924	-0.117621	-1.0673
Bradi5g23182	1	17.2352	7.77751	2.82385	6.8949	8.81639	6.71204		0.451258	0.163842	0.400048	0.511534	0.389438		1.84853	-0.125023	-1.15872	-0.309199	0.0917615	-0.347356
Bradi5g23510	1	71.7485	30.1198	27.3038	20.7623	23.81	20.3316		0.419797	0.38055	0.289377	0.331854	0.283374		2.00329	-0.113185	-0.256353	-0.588936	-0.433984	-0.610832
Bradi5g25570	1	225.476	21.1243	12.256	8.07136	14.8403	6.614		0.0936878	0.054356	0.0357971	0.0658176	0.0293336		2.03763	-0.309405	-0.411261	-0.459322	-0.381579	-0.47606
Bradi5g26567	1	154.335	88.0633	74.6193	88.9501	91.7595	28.8611		0.570597	0.483488	0.576343	0.594546	0.187003		1.65482	0.00742037	-0.326773	0.0294649	0.0993003	-1.46424
Bradi5g26650	1	76.4771	37.581	21.6721	8.47326	7.87884	5.40899		0.491402	0.28338	0.110795	0.103022	0.0707269		1.83165	0.413254	-0.166887	-0.6482	-0.669877	-0.759943
Bradi1g00830	2	14.0375	16.3841	12.5997	5.88462	3.4067	20.0515		1.16716	0.897574	0.419207	0.242686	1.42842		0.312736	0.683963	0.0852725	-0.977062	-1.36907	1.26416
Bradi1g00840	2	6.61625	3.86004	3.10782	3.28057	3.69734	5.91126		0.583418	0.469726	0.495836	0.558827	0.893445		1.49256	-0.373929	-0.883328	-0.766341	-0.484111	1.01515
Bradi1g01480	2	132.938	117.379	91.1811	57.3237	68.6484	161.16		0.882959	0.68589	0.431205	0.516393	1.21229		0.70983	0.317721	-0.342499	-1.19574	-0.910348	1.42104
Bradi1g01800	2	118.047	121.027	82.7124	40.8722	58.4444	91.6713		1.02525	0.700675	0.346237	0.495095	0.776568		1.02116	1.11456	-0.0861807	-1.39741	-0.846716	0.194583
Bradi1g01820	2	9.65837	8.61579	8.68692	5.25774	4.10765	10.4567		0.892054	0.89942	0.544371	0.425294	1.08265		0.735007	0.323278	0.35137	-1.00287	-1.45705	1.05026
Bradi1g02030	2	150.286	123.739	99.633	45.0641	13.9909	146.607		0.823355	0.662955	0.299856	0.093095	0.975516		0.961702	0.486564	0.0551202	-0.921544	-1.47769	0.895846
Bradi1g02080	2	28.5054	18.6095	13.3967	17.2547	15.5891	26.3076		0.652842	0.469971	0.605313	0.546883	0.922898		1.40889	-0.219575	-1.07739	-0.442526	-0.716614	1.04722
Bradi1g02150	2	29.3861	34.1325	25.2661	8.34385	1.97749	28.4408		1.16152	0.859798	0.283939	0.0672934	0.967833		0.627861	0.994497	0.309616	-0.997527	-1.48929	0.554845
Bradi1g02550	2	110.847	86.8437	39.1125	15.4326	5.46428	65.8328		0.783454	0.35285	0.139224	0.0492955	0.593905		1.37941	0.797756	-0.358869	-0.932682	-1.17423	0.288618
Bradi1g03220	2	122.035	118.112	105.297	52.5511	17.0213	119.776		0.967861	0.862845	0.430625	0.139479	0.981489		0.748524	0.659298	0.367748	-0.832205	-1.6405	0.697133
Bradi1g03340	2	70.2277	51.1427	39.4224	21.1235	23.1754	65.2213		0.728241	0.561351	0.300787	0.330004	0.928713		1.2111	0.292992	-0.270827	-1.15112	-1.05241	0.970263
Bradi1g03686	2	23.1493	6.95807	7.66142	7.69581	0.888999	19.8318		0.300574	0.330957	0.332443	0.0384029	0.856694		1.41596	-0.475885	-0.393704	-0.389685	-1.18502	1.02834
Bradi1g03947	2	9.65218	8.64433	6.18813	4.19751	3.7757	10.2261		0.895584	0.641112	0.434877	0.391176	1.05946		0.909085	0.548112	-0.331612	-1.04458	-1.19565	1.11465
Bradi1g04120	2	46.5634	31.7529	34.7638	22.5433	25.9589	40.5666		0.681928	0.746591	0.484142	0.557495	0.871212		1.43565	-0.216217	0.119601	-1.2434	-0.862446	0.766809
Bradi1g04130	2	179.816	176.327	145.453	70.7028	25.5577	192.125		0.980595	0.808899	0.393195	0.142132	1.06845		0.707911	0.656614	0.202725	-0.896213	-1.55991	0.888875
Bradi1g04210	2	36.0682	43.4626	46.0283	19.4698	16.079	47.6879		1.20501	1.27614	0.539805	0.445795	1.32216		0.0918507	0.627081	0.812793	-1.10961	-1.35504	0.932921
Bradi1g04300	2	91.8658	95.157	86.5874	51.1462	32.3184	119.289		1.03583	0.942541	0.556749	0.3518	1.29852		0.391991	0.495433	0.226087	-0.887836	-1.4796	1.25392
Bradi1g04810	2	114.795	106.808	74.267	42.2682	25.593	103.391		0.930423	0.646952	0.368205	0.222945	0.900656		0.996922	0.781377	-0.0967948	-0.960331	-1.41034	0.689163
Bradi1g05240	2	100.428	89.415	81.9149	32.1724	16.0782	123.441		0.89034	0.815657	0.320352	0.160097	1.22915		0.641405	0.375046	0.193647	-1.00942	-1.39868	1.198
Bradi1g06030	2	39.4751	38.1435	27.4134	8.82936	3.15129	29.9853		0.966267	0.694448	0.223669	0.0798299	0.759601		0.987318	0.899526	0.1921	-1.03313	-1.40748	0.361664
Bradi1g06750	2	54.0367	40.6617	34.5036	20.4021	20.7976	72.9384		0.752482	0.638522	0.37756	0.384879	1.34979		0.663541	0.00516686	-0.297955	-0.992086	-0.97262	1.59395
Bradi1g06772	2	51.2011	55.7343	53.8173	23.1742	13.3495	58.6011		1.08854	1.0511	0.452611	0.260726	1.14453		0.443396	0.678348	0.578989	-1.00923	-1.51844	0.826933
Bradi1g06890	2	903.6	754.68	569.958	355.957	323.871	810.64		0.835192	0.630764	0.393932	0.358423	0.897123		1.16879	0.555519	-0.205192	-1.08648	-1.21861	0.785973
Bradi1g07140	2	168.159	176.215	126	70.9345	69.1464	135.145		1.04791	0.749291	0.42183	0.411196	0.803675		0.951976	1.1267	0.0375959	-1.15672	-1.1955	0.235942
Bradi1g07170	2	1242.7	1275.15	953.149	448.137	269.008	1398.31		1.02611	0.766999	0.360616	0.216471	1.12522		0.662623	0.731623	0.0469357	-1.0269	-1.40779	0.993508
Bradi1g07370	2	121.374	97.492	87.2165	33.883	14.5286	87.1813		0.803238	0.718578	0.279162	0.119701	0.718288		1.17297	0.586456	0.3341	-0.975718	-1.45104	0.333237
Bradi1g07530	2	198.151	133.739	86.5791	36.5502	15.6607	181.852		0.674938	0.436936	0.184457	0.0790344	0.917748		1.1876	0.331907	-0.294607	-0.959231	-1.23675	0.971079
Bradi1g07700	2	10.6315	11.3382	9.34618	4.598	5.34577	9.23121		1.06647	0.879104	0.432489	0.502825	0.86829		0.793773	1.04688	0.333448	-1.36709	-1.09928	0.29227
Bradi1g07930	2	87.7858	59.2283	47.0651	32.8839	44.4213	69.4713		0.674691	0.536135	0.374592	0.506019	0.791373		1.56994	0.122599	-0.493852	-1.21258	-0.627846	0.641733
Bradi1g07960	2	44.0782	48.8555	41.1613	8.68712	11.9466	49.3699		1.10838	0.933825	0.197084	0.271032	1.12005		0.539854	0.796173	0.383352	-1.35902	-1.18413	0.823774
Bradi1g07980	2	58.3505	63.2594	52.6569	26.657	17.3264	93.594		1.08413	0.902425	0.456843	0.296936	1.604		0.23308	0.412518	0.0249612	-0.92542	-1.26649	1.52135
Bradi1g09300	2	2031.05	2172.63	1575.72	740.432	624.675	2509.04		1.06971	0.775815	0.364556	0.307563	1.23534		0.542229	0.724095	-0.0426536	-1.1156	-1.26429	1.15622
Bradi1g09615	2	57.5522	49.7211	48.327	24.6222	35.711	51.0656		0.863932	0.839708	0.427825	0.620498	0.887292		1.08189	0.432786	0.317227	-1.64763	-0.728497	0.544224
Bradi1g09760	2	67.8746	50.8202	33.876	14.2459	10.1566	87.1918		0.748736	0.499096	0.209886	0.149638	1.2846		0.78492	0.223578	-0.334135	-0.980251	-1.11485	1.42074
Bradi1g09790	2	63.479	42.6447	21.1996	16.8985	5.8498	43.457		0.671791	0.333962	0.266206	0.0921532	0.684588		1.46748	0.488306	-0.519573	-0.721716	-1.24098	0.526484
Bradi1g09840	2	7.68366	5.47331	3.21153	5.75635	2.3593	8.99638		0.712332	0.417969	0.749167	0.307055	1.17085		0.829928	-0.0421262	-0.934475	0.0695397	-1.27071	1.34784
Bradi1g09940	2	103.616	119.071	117.393	74.8072	48.0367	109.272		1.14916	1.13296	0.721965	0.463603	1.05459		0.292731	0.841121	0.781588	-0.729488	-1.67938	0.493428
Bradi1g10347	2	10.5223	8.70493	6.01757	3.62404	5.93539	8.60513		0.827285	0.571889	0.344416	0.564078	0.817801		1.31909	0.589864	-0.488459	-1.44888	-0.521437	0.54982
Bradi1g10660	2	73.0489	64.9427	43.1008	29.4914	33.8844	84.5677		0.88903	0.590026	0.403722	0.463858	1.15769		0.80842	0.448541	-0.521135	-1.12533	-0.9303	1.3198
Bradi1g10960	2	80.746	63.8342	33.8278	21.8518	19.2789	78.4676		0.790556	0.418941	0.270624	0.238759	0.971784		1.10654	0.504399	-0.56398	-0.990387	-1.082	1.02542
Bradi1g11050	2	4.8991	3.68401	4.15544	0.369836	0.823084	4.72538		0.751976	0.848203	0.0754906	0.168007	0.964541		0.895457	0.287474	0.523356	-1.37081	-1.14402	0.808536
Bradi1g11270	2	124.423	102.458	75.471	21.7789	11.7417	111.945		0.823461	0.606567	0.175038	0.094369	0.899713		1.0429	0.582782	0.0174854	-1.10722	-1.31747	0.781518
Bradi1g11610	2	56.1882	49.9096	40.5418	17.9274	19.328	48.4909		0.888258	0.721535	0.31906	0.343987	0.863008		1.06736	0.683477	0.110714	-1.27196	-1.18632	0.596734
Bradi1g11986	2	97.4529	101.72	72.2898	51.0744	43.6327	101.769		1.04379	0.741793	0.524094	0.447731	1.04429		0.741514	0.90409	-0.217161	-1.02544	-1.30895	0.905947
Bradi1g12200	2	38.5325	40.3602	29.6254	14.8114	13.2499	38.8682		1.04743	0.768842	0.384387	0.343863	1.00871		0.750305	0.897899	0.0310195	-1.16527	-1.29137	0.777415
Bradi1g12260	2	51.8048	47.7711	35.3255	17.594	15.5578	58.3012		0.922136	0.681897	0.33962	0.300316	1.1254		0.780979	0.557224	-0.133142	-1.11673	-1.22968	1.14134
Bradi1g12280	2	57.8369	48.1436	19.9864	5.06461	7.96045	74.4166		0.832403	0.345564	0.087567	0.137636	1.28666		0.777786	0.439227	-0.544225	-1.0654	-0.964255	1.35687
Bradi1g12300	2	78.3121	79.6803	56.4042	32.4966	29.9589	90.9843		1.01747	0.720248	0.414963	0.382558	1.16182		0.657562	0.710465	-0.18954	-1.11396	-1.21208	1.14755
Bradi1g12880	2	136.624	88.7322	56.4057	36.8964	29.8093	118.567		0.649461	0.412852	0.270057	0.218184	0.867834		1.33632	0.247622	-0.487233	-0.930725	-1.09183	0.925844
Bradi1g12960	2	5.42031	4.8418	4.22262	2.15501	2.85408	6.2973		0.893271	0.779037	0.397582	0.526553	1.1618		0.717108	0.347294	-0.0485196	-1.37025	-0.923367	1.27773
Bradi1g14480	2	5.42418	3.69191	4.59187	3.66606	1.99271	5.97024		0.680639	0.846555	0.675874	0.367376	1.10067		0.841188	-0.371752	0.258402	-0.38985	-1.56153	1.22355
Bradi1g14710	2	107.154	103.026	79.404	46.2301	35.7799	89.1081		0.961469	0.741024	0.431434	0.33391	0.831586		1.02559	0.886166	0.0884843	-1.03177	-1.38466	0.416185
Bradi1g15170	2	200.452	147.364	108.994	68.7008	65.1885	274.578		0.735159	0.543739	0.342729	0.325207	1.36979		0.688563	0.0385839	-0.431204	-0.924529	-0.967531	1.59612
Bradi1g15507	2	6.50925	4.09078	2.0699	2.00636	2.00861	7.05648		0.628456	0.317993	0.308232	0.308578	1.08407		1.09229	0.0572954	-0.807545	-0.834738	-0.833773	1.32647
Bradi1g18170	2	59.5951	46.6572	39.0541	26.7418	22.6887	61.6607		0.782903	0.655324	0.448725	0.380715	1.03466		1.03427	0.2407	-0.225647	-0.980843	-1.22945	1.16096
Bradi1g18650	2	563.944	654.765	529.66	119.334	20.9785	551.967		1.16105	0.939207	0.211606	0.0371997	0.978762		0.590808	0.932211	0.461933	-1.08051	-1.45023	0.545785
Bradi1g18660	2	90.202	68.0267	49.5379	32.0297	31.1186	130.385		0.754159	0.549189	0.355089	0.344988	1.44548		0.607278	0.0297757	-0.451719	-0.907677	-0.931406	1.65375
Bradi1g19080	2	753.386	772.22	610.912	301.506	225.363	1143.49		1.025	0.810888	0.400201	0.299134	1.5178		0.351861	0.407593	-0.0697388	-0.985314	-1.21063	1.50623
Bradi1g19140	2	94.1326	93.2674	80.2333	46.4531	33.8769	101.037		0.990809	0.852344	0.493486	0.359885	1.07335		0.690054	0.659118	0.193078	-1.01476	-1.46442	0.93693
Bradi1g19250	2	368.448	319.6	219.226	128.358	62.4219	290.624		0.867422	0.594996	0.348374	0.169418	0.788779		1.16297	0.748313	-0.10374	-0.875087	-1.4348	0.502343
Bradi1g20370	2	117.089	91.5357	92.5579	45.9774	29.9677	85.4386		0.781762	0.790492	0.392671	0.255939	0.72969		1.22772	0.443309	0.474688	-0.955205	-1.44666	0.256144
Bradi1g20860	2	39.0148	42.3095	22.7831	5.54669	1.8614	29.9964		1.08445	0.58396	0.142169	0.04771	0.768845		0.913091	1.10806	-0.0474735	-1.06749	-1.28558	0.379395
Bradi1g20950	2	87.8311	84.6199	118.047	80.4875	22.8268	142.042		0.963439	1.34402	0.91639	0.259894	1.61721		-0.0366528	-0.116295	0.712743	-0.218786	-1.64887	1.30786
Bradi1g21990	2	23.5691	23.6181	21.7632	11.4341	13.9465	27.1353		1.00208	0.92338	0.48513	0.59173	1.15131		0.540027	0.547994	0.246701	-1.43106	-1.02296	1.1193
Bradi1g22180	2	13.9888	6.86099	10.21	6.64033	7.37583	12.8322		0.490463	0.729869	0.474688	0.527266	0.91732		1.35447	-0.871362	0.174451	-0.94027	-0.710593	0.9933
Bradi1g23110	2	3.94753	5.40452	4.6759	1.93027	1.42997	3.88897		1.36909	1.18451	0.488982	0.362245	0.985165		0.258013	1.19469	0.726267	-1.03885	-1.36048	0.220365
Bradi1g23270	2	35.8329	25.4302	24.8944	20.7323	13.9146	37.1585		0.70969	0.694737	0.578584	0.388318	1.03699		1.06825	-0.100794	-0.161009	-0.628745	-1.39492	1.21722
Bradi1g23516	2	4.97298	3.98237	2.82217	2.42782	3.23645	5.73629		0.800801	0.5675	0.488202	0.650807	1.15349		0.861963	0.0926896	-0.808282	-1.11452	-0.486565	1.45472
Bradi1g24110	2	121.165	109.111	95.9048	63.2286	42.7175	132.977		0.900516	0.791524	0.521839	0.352557	1.09749		0.774648	0.428566	0.0494108	-0.888753	-1.47765	1.11377
Bradi1g24250	2	42.4427	35.7291	31.363	19.3915	19.3659	62.4257		0.84182	0.738949	0.456887	0.456284	1.47082		0.452543	0.0376632	-0.232151	-0.971953	-0.973535	1.68743
Bradi1g24500	2	44.4735	48.3777	41.3753	31.5711	11.4248	47.362		1.08779	0.930337	0.709885	0.256891	1.06495		0.49943	0.776296	0.279728	-0.415535	-1.84419	0.704267
Bradi1g24590	2	51.8915	33.6134	20.3541	15.985	13.2319	40.5911		0.647763	0.392243	0.308046	0.254991	0.782229		1.47706	0.283189	-0.582872	-0.868249	-1.04807	0.738946
Bradi1g24747	2	70.3481	52.0823	30.5261	33.7339	28.1325	65.9648		0.74035	0.433929	0.479528	0.399904	0.937691		1.2647	0.28378	-0.873833	-0.70157	-1.00238	1.0293
Bradi1g25150	2	433.593	369.829	340.522	132.725	89.6357	473.801		0.852941	0.785349	0.306106	0.206728	1.09273		0.797748	0.39693	0.212703	-1.09351	-1.36437	1.0505
Bradi1g26080	2	5.02666	2.95903	2.51848	2.1227	2.12653	6.05712		0.588667	0.501025	0.422287	0.42305	1.205		0.93447	-0.305479	-0.569674	-0.807025	-0.804725	1.55243
Bradi1g26240	2	19.524	15.9871	11.6498	4.63286	4.36067	15.1964		0.818842	0.59669	0.237291	0.22335	0.778343		1.22085	0.655081	-0.038713	-1.16114	-1.20468	0.5286
Bradi1g26350	2	1525.64	1505.03	1063.94	621.149	307.034	1220.16		0.986488	0.697374	0.40714	0.201249	0.799769		0.991214	0.949095	0.0479131	-0.856766	-1.49854	0.367082
Bradi1g26520	2	32.5564	28.0556	24.582	10.1306	11.6327	48.7397		0.861754	0.755059	0.311172	0.357309	1.49709		0.461543	0.147126	-0.0955329	-1.10507	-1.00014	1.59208
Bradi1g26530	2	122.542	76.6134	77.2716	32.7736	14.396	81.1774		0.625201	0.630572	0.267448	0.117478	0.662445		1.42968	0.23753	0.254616	-0.900402	-1.37742	0.355997
Bradi1g26540	2	163.037	133.957	101.406	36.235	24.5999	142.565		0.821632	0.621979	0.22225	0.150885	0.874434		1.08585	0.582523	0.019138	-1.10882	-1.3102	0.73152
Bradi1g27130	2	11.8142	9.75222	5.43212	3.39315	2.38834	9.83944		0.825464	0.459795	0.287209	0.202158	0.832847		1.21246	0.681762	-0.430095	-0.954862	-1.21347	0.704208
Bradi1g27140	2	25.4188	25.7809	20.235	13.3947	12.0117	40.2962		1.01425	0.796062	0.526961	0.472552	1.58529		0.248137	0.2832	-0.253818	-0.916161	-1.05008	1.68872
Bradi1g27197	2	17.4159	14.7992	9.29495	4.71185	5.92902	23.5958		0.849751	0.533705	0.270549	0.340437	1.35484		0.6562	0.297833	-0.455983	-1.08365	-0.916956	1.50255
Bradi1g27280	2	182.824	145.997	104.331	63.9911	51.7218	202.374		0.79857	0.570666	0.350016	0.282905	1.10694		0.927622	0.334728	-0.336088	-0.985554	-1.18309	1.24238
Bradi1g28140	2	75.3908	46.8579	30.0104	19.6322	10.3578	82.7767		0.621534	0.398064	0.260406	0.137388	1.09797		1.05024	0.0903906	-0.476364	-0.825486	-1.13748	1.2987
Bradi1g28160	2	25.3446	16.0164	10.4327	9.73003	9.67873	26.1093		0.631944	0.411634	0.383909	0.381885	1.03017		1.17914	-0.0261327	-0.747585	-0.838373	-0.845003	1.27795
Bradi1g28320	2	3.11027	7.05056	5.99956	4.19844	2.79486	6.65354		2.26686	1.92895	1.34986	0.89859	2.13921		-1.00718	1.12923	0.559377	-0.417185	-1.1782	0.913965
Bradi1g28416	2	58.7833	56.0444	49.9566	32.7646	22.7853	80.5368		0.953407	0.849843	0.557379	0.387615	1.37006		0.423137	0.288973	-0.00923714	-0.851386	-1.34022	1.48873
Bradi1g28580	2	25.4664	21.8473	15.7632	13.0564	10.0727	24.2819		0.85789	0.618979	0.512692	0.395529	0.953488		1.11147	0.54105	-0.417919	-0.844545	-1.31483	0.924775
Bradi1g28860	2	6.28173	5.09822	4.02399	3.52316	2.38282	6.96003		0.811594	0.640587	0.560859	0.379326	1.10798		0.907128	0.223339	-0.397308	-0.686667	-1.34552	1.29902
Bradi1g28960	2	93.5733	73.0152	48.1106	24.6153	18.9467	72.5417		0.780299	0.514149	0.263059	0.20248	0.775239		1.29718	0.603427	-0.237004	-1.02988	-1.22117	0.587448
Bradi1g29210	2	9.59418	5.11566	2.95904	3.50012	4.50249	10.4559		0.533205	0.308421	0.364817	0.469293	1.08982		1.11555	-0.282737	-0.956077	-0.787141	-0.474183	1.38459
Bradi1g29500	2	251.294	235.222	188.705	79.4267	34.497	217.139		0.936042	0.750932	0.316071	0.137277	0.864084		0.934831	0.755064	0.234779	-0.987478	-1.49001	0.552815
Bradi1g29590	2	272.217	234.062	140.934	112.341	55.3359	437.328		0.859837	0.517725	0.412689	0.203279	1.60654		0.462374	0.184612	-0.493351	-0.701501	-1.11649	1.66436
Bradi1g30811	2	265.253	224.782	185.08	104.746	42.3075	190.615		0.847423	0.697747	0.394889	0.159498	0.718616		1.18226	0.686202	0.199574	-0.785079	-1.55038	0.267425
Bradi1g31660	2	29.0098	23.1821	21.5854	13.4974	14.0044	28.9346		0.799113	0.744072	0.465271	0.482746	0.997408		1.06708	0.216091	-0.0170708	-1.19811	-1.12408	1.0561
Bradi1g33030	2	122.224	122.182	101.088	64.2972	38.0933	140.7		0.999658	0.827076	0.526061	0.311669	1.15117		0.613642	0.612578	0.0760729	-0.859691	-1.52617	1.08357
Bradi1g33160	2	14.2192	15.3531	12.6882	5.30736	5.5667	21.4401		1.07974	0.892327	0.373253	0.391491	1.50783		0.289758	0.473295	0.0419361	-1.15278	-1.1108	1.45859
Bradi1g33500	2	3.45631	4.59052	4.43911	3.06906	1.49528	5.46561		1.32816	1.28435	0.887959	0.432622	1.58134		-0.212122	0.599757	0.491378	-0.489318	-1.61585	1.22615
Bradi1g34040	2	22.7209	14.735	10.1127	3.4657	6.70472	30.0203		0.648523	0.445083	0.152534	0.295091	1.32127		0.801304	0.0107366	-0.446855	-1.10488	-0.784229	1.52392
Bradi1g34525	2	140.381	124.947	72.5614	36.674	16.6159	128.43		0.890056	0.516891	0.261247	0.118363	0.914869		1.0274	0.732548	-0.26822	-0.953814	-1.337	0.799092
Bradi1g34560	2	242.449	192.731	143.954	115.882	91.0953	222.594		0.794935	0.593747	0.477963	0.375729	0.918106		1.2272	0.406369	-0.398942	-0.862403	-1.27162	0.899397
Bradi1g34647	2	15.2731	21.5518	20.0628	6.22264	3.71786	16.0198		1.41109	1.3136	0.407424	0.243425	1.04888		0.201071	1.06274	0.858389	-1.04099	-1.38474	0.303535
Bradi1g35130	2	61.1402	43.3654	34.0589	27.5432	23.9149	77.9911		0.709277	0.557062	0.450492	0.391149	1.27561		0.781698	-0.0618666	-0.503535	-0.81276	-0.98495	1.58141
Bradi1g35520	2	34.0059	36.6189	16.4764	17.7047	21.3445	29.7409		1.07684	0.484518	0.520636	0.627672	0.874582		0.930218	1.23315	-1.10196	-0.959574	-0.537609	0.435781
Bradi1g36260	2	348.741	281.125	113.302	71.7785	21.43	598.517		0.806116	0.324888	0.205822	0.0614497	1.71622		0.506405	0.193966	-0.581518	-0.77339	-1.00604	1.66058
Bradi1g36560	2	66.4235	58.6388	27.0693	11.3068	13.7983	50.2321		0.882801	0.407525	0.170223	0.207733	0.756239		1.2046	0.875708	-0.458071	-1.12402	-1.01875	0.520533
Bradi1g36580	2	11.8217	10.8338	11.2658	6.64109	5.43357	11.6744		0.916432	0.952975	0.561771	0.459627	0.987541		0.784789	0.433968	0.587377	-1.05491	-1.48371	0.732485
Bradi1g36860	2	112.504	109.012	91.1003	61.5824	36.6234	99.4586		0.96896	0.809751	0.547379	0.325529	0.884044		0.918517	0.801696	0.202507	-0.784945	-1.61989	0.482111
Bradi1g37390	2	101.676	79.4632	69.2632	38.4647	36.1585	87.5278		0.781534	0.681216	0.378307	0.355626	0.860852		1.23864	0.402795	0.0189776	-1.13995	-1.22673	0.706264
Bradi1g37600	2	257.856	253.192	155.91	42.757	16.5416	183.438		0.98191	0.60464	0.165817	0.0641504	0.711397		1.03453	0.989105	0.0418176	-1.06002	-1.3153	0.309872
Bradi1g37620	2	21.2529	24.8556	22.4576	9.58326	11.1201	26.5806		1.16951	1.05668	0.450914	0.523225	1.25068		0.270195	0.770777	0.43758	-1.35127	-1.13774	1.01046
Bradi1g38120	2	5.98681	5.79806	4.29814	1.94674	1.67565	4.81867		0.968472	0.717934	0.325171	0.27989	0.804881		1.01495	0.914096	0.112634	-1.1438	-1.28865	0.390772
Bradi1g38321	2	17.1912	12.8548	10.1979	7.99323	7.47456	12.0819		0.747758	0.593204	0.464962	0.43479	0.702798		1.6403	0.433141	-0.306519	-0.920252	-1.06464	0.21797
Bradi1g38630	2	138.501	119.792	106.448	40.1161	24.0461	137.372		0.864917	0.768571	0.289644	0.173617	0.99185		0.88322	0.508706	0.241588	-1.08623	-1.40791	0.860624
Bradi1g39167	2	106.811	110.191	72.2385	45.9034	46.0451	173.225		1.03165	0.67632	0.429762	0.431089	1.62179		0.296923	0.366579	-0.415524	-0.958218	-0.955298	1.66554
Bradi1g41970	2	11.5624	13.5542	15.8445	4.13284	5.43813	20.1562		1.17227	1.37035	0.357439	0.470331	1.74326		-0.0356624	0.288677	0.661617	-1.24544	-1.03289	1.3637
Bradi1g42795	2	7.56375	4.1625	2.71569	2.83018	2.5539	7.48277		0.550322	0.35904	0.374176	0.33765	0.989293		1.26973	-0.163955	-0.773812	-0.725555	-0.84201	1.2356
Bradi1g43410	2	45.2494	43.4057	24.4125	9.02731	5.78049	37.2046		0.959255	0.53951	0.199501	0.127747	0.822213		1.02925	0.922256	-0.179947	-1.07277	-1.26119	0.5624
Bradi1g43940	2	32.4692	31.8334	25.1691	16.6758	14.1431	29.7633		0.98042	0.775169	0.513587	0.435586	0.916662		0.943851	0.863418	0.0202592	-1.0543	-1.37473	0.601505
Bradi1g44530	2	71.3436	72.3697	64.73	39.5773	20.418	108.321		1.01438	0.9073	0.554742	0.286193	1.5183		0.282634	0.316551	0.0640201	-0.767414	-1.40073	1.50494
Bradi1g44630	2	60.8186	56.9976	34.0263	18.4647	4.50508	47.6014		0.937172	0.559472	0.303602	0.074074	0.782678		1.0647	0.893397	-0.136401	-0.834027	-1.45983	0.472169
Bradi1g45010	2	88.711	84.6832	76.4127	43.7676	29.7869	94.4151		0.954597	0.861367	0.493373	0.335775	1.0643		0.720463	0.568386	0.256116	-0.976463	-1.50433	0.935831
Bradi1g45125	2	53.6728	44.8107	37.0588	12.7081	16.0134	55.6833		0.834888	0.690457	0.23677	0.298353	1.03746		0.917946	0.439844	0.0216287	-1.29208	-1.11376	1.02642
Bradi1g45210	2	7.7121	7.13118	5.38972	2.99132	2.43201	7.48948		0.924674	0.698865	0.387873	0.31535	0.971134		0.937549	0.688603	-0.0576738	-1.08547	-1.32516	0.842149
Bradi1g45410	2	12.406	10.4099	10.1335	3.57194	3.64574	11.068		0.839106	0.816829	0.287921	0.29387	0.892151		0.991758	0.479809	0.408925	-1.27401	-1.25508	0.648592
Bradi1g45833	2	53.3906	59.6182	37.1284	19.2322	13.3037	82.0102		1.11664	0.695411	0.360218	0.249177	1.53604		0.35681	0.596344	-0.268683	-0.957025	-1.18505	1.45761
Bradi1g46450	2	10.4383	9.87106	8.44886	5.53184	4.49273	14.9717		0.945655	0.809407	0.529954	0.430407	1.4343		0.392202	0.241797	-0.13528	-0.908691	-1.1842	1.59417
Bradi1g46540	2	77.6378	40.3823	35.4203	10.1168	18.6821	47.9973		0.520137	0.456225	0.130308	0.240632	0.618221		1.64949	0.0844175	-0.12403	-1.187	-0.827185	0.404317
Bradi1g47090	2	132.007	115.699	93.0464	64.8957	76.4205	107.969		0.87646	0.70486	0.491609	0.578914	0.817904		1.34038	0.691114	-0.210733	-1.33148	-0.872649	0.383368
Bradi1g47180	2	233.767	138.748	127.346	101.838	46.0663	176.922		0.593532	0.544758	0.435637	0.197061	0.756831		1.50213	0.0202779	-0.157536	-0.555355	-1.42513	0.615612
Bradi1g47580	2	13.5715	15.3346	12.9546	9.78069	5.61603	13.4034		1.12991	0.954541	0.720677	0.413809	0.987607		0.510286	1.01155	0.334875	-0.567536	-1.75164	0.462467
Bradi1g49040	2	26.2389	29.225	24.0137	14.2458	7.53383	23.9645		1.1138	0.915193	0.542925	0.287124	0.913318		0.651213	1.01342	0.381293	-0.803549	-1.6177	0.375324
Bradi1g49770	2	175.127	166.834	145.042	69.2556	34.4425	196.576		0.952647	0.828208	0.39546	0.196671	1.12248		0.679813	0.551438	0.214076	-0.959128	-1.49805	1.01185
Bradi1g50040	2	60.2946	60.4684	43.5434	23.874	12.9098	83.5466		1.00288	0.722177	0.395956	0.214113	1.38564		0.49286	0.499525	-0.149375	-0.903491	-1.32385	1.38433
Bradi1g50270	2	415.754	481.209	436.404	268.335	181.89	665.38		1.15744	1.04967	0.645417	0.437495	1.60042		0.0448744	0.431779	0.166941	-0.826519	-1.33749	1.52042
Bradi1g50750	2	15.6897	13.0426	13.2927	6.86747	10.6797	14.1241		0.831285	0.847225	0.437705	0.680684	0.900212		1.09403	0.244012	0.324321	-1.73891	-0.514739	0.591283
Bradi1g50826	2	17.3407	16.2163	11.8186	7.52452	7.07124	19.7809		0.935157	0.681551	0.433922	0.407782	1.14072		0.761921	0.550317	-0.277289	-1.08539	-1.17069	1.22113
Bradi1g51020	2	119.537	107.406	84.5951	26.9947	5.52553	90.207		0.898522	0.707692	0.225827	0.0462246	0.754639		1.03171	0.766329	0.267285	-0.992847	-1.46253	0.390057
Bradi1g51040	2	61.9376	63.0255	47.0283	19.3909	18.3324	104.879		1.01756	0.759285	0.313071	0.295982	1.6933		0.293704	0.32732	-0.166978	-1.02095	-1.05365	1.62055
Bradi1g51140	2	62.6692	58.7194	55.6649	25.7484	24.7152	94.192		0.936974	0.888234	0.410862	0.394375	1.503		0.348608	0.196478	0.0788318	-1.07343	-1.11322	1.56273
Bradi1g51170	2	61.1683	46.0831	38.97	22.5258	19.1267	58.6944		0.753382	0.637095	0.368259	0.312689	0.959555		1.133	0.281558	-0.119923	-1.04807	-1.23993	0.993364
Bradi1g52020	2	584.882	621.211	454.658	256.394	162.939	598.674		1.06211	0.77735	0.438369	0.278585	1.02358		0.711132	0.897769	0.0421179	-0.976445	-1.45656	0.781989
Bradi1g52550	2	603.252	636.68	520.474	393.353	286.555	579.815		1.05541	0.86278	0.652055	0.475017	0.961148		0.732495	0.977607	0.125524	-0.806585	-1.58968	0.560639
Bradi1g52670	2	13.9729	11.5881	7.63725	3.11912	1.12635	18.002		0.829332	0.546578	0.223227	0.0806099	1.28835		0.729191	0.361704	-0.247132	-0.943381	-1.25047	1.35009
Bradi1g53100	2	119.096	107.709	84.8974	44.5979	36.7001	103.999		0.904391	0.71285	0.374471	0.308156	0.873237		1.04889	0.719534	0.0597083	-1.10595	-1.33439	0.612213
Bradi1g54030	2	109.95	126.942	91.3101	34.0662	6.96953	141.635		1.15454	0.830467	0.309833	0.063388	1.28817		0.463631	0.781226	0.115224	-0.954733	-1.4612	1.05585
Bradi1g55300	2	191.649	178.518	147.932	79.315	65.4084	147.053		0.931485	0.771887	0.413855	0.341292	0.767302		1.09634	0.842312	0.250577	-1.07689	-1.34592	0.233578
Bradi1g55370	2	107.424	33.9257	24.892	10.8375	13.2709	61.441		0.315811	0.231718	0.100885	0.123538	0.571949		1.77336	-0.2178	-0.462533	-0.843289	-0.777364	0.527626
Bradi1g55488	2	90.9535	53.8688	39.8072	15.1016	19.706	123.09		0.592267	0.437665	0.166036	0.21666	1.35333		0.79945	-0.0759906	-0.407934	-0.991147	-0.882454	1.55808
Bradi1g55740	2	486.621	468.805	337.068	173.882	118.032	388.403		0.96339	0.692672	0.357326	0.242555	0.798164		1.03367	0.916987	0.0541435	-1.01469	-1.38049	0.390372
Bradi1g56130	2	623.591	516.867	386.483	121.649	43.932	411.269		0.828855	0.61977	0.195078	0.0704499	0.659517		1.21201	0.738127	0.159191	-1.01675	-1.36183	0.269246
Bradi1g56630	2	21.2348	21.707	19.1953	9.72473	9.06318	17.6275		1.02224	0.903956	0.457962	0.426808	0.830125		0.852196	0.935877	0.490812	-1.18733	-1.30456	0.213006
Bradi1g56730	2	7.67822	4.76854	4.03288	2.36273	2.38535	8.962		0.621047	0.525237	0.307718	0.310665	1.1672		0.964541	-0.0958793	-0.363984	-0.972666	-0.964421	1.43241
Bradi1g57000	2	5.27369	6.32898	5.58022	3.11903	1.57509	7.66706		1.2001	1.05812	0.591432	0.29867	1.45383		0.15789	0.634384	0.296297	-0.815002	-1.51214	1.23857
Bradi1g57730	2	2.94774	5.34452	5.29283	1.78459	1.18127	6.15544		1.81309	1.79555	0.605411	0.400737	2.08819		-0.400625	0.747047	0.722297	-0.957586	-1.24648	1.13535
Bradi1g58550	2	7.20136	4.85588	3.06342	0.627755	0.482238	6.17252		0.674301	0.425394	0.0871717	0.0669648	0.857132		1.22748	0.397191	-0.237335	-1.09955	-1.15106	0.863275
Bradi1g58600	2	178.02	140.502	111.299	46.0891	61.0355	223.868		0.789247	0.625205	0.258899	0.342858	1.25755		0.750076	0.200625	-0.227044	-1.18203	-0.963146	1.42152
Bradi1g59220	2	2780.17	2740.37	2080.62	1220.59	966.389	3195.06		0.985685	0.748379	0.439034	0.347601	1.14923		0.680077	0.63616	-0.0918609	-1.04089	-1.32139	1.1379
Bradi1g59500	2	170.852	155.766	98.6391	59.3985	38.4055	217.569		0.9117	0.577336	0.34766	0.224788	1.27343		0.682935	0.465639	-0.3572	-0.922409	-1.22479	1.35582
Bradi1g60050	2	31.1135	28.9249	22.5254	19.6029	11.1143	37.5173		0.929657	0.723974	0.630044	0.357217	1.20582		0.639395	0.4054	-0.278797	-0.591251	-1.4988	1.32405
Bradi1g60100	2	83.8348	71.9794	51.8445	31.9015	14.9082	80.1216		0.858586	0.618412	0.380529	0.177829	0.955709		1.00529	0.580703	-0.14041	-0.854649	-1.46325	0.872311
Bradi1g60300	2	61.5059	64.2513	48.0234	35.7486	25.7142	54.0958		1.04464	0.780793	0.581223	0.418077	0.879522		0.8835	1.06612	-0.0132921	-0.829749	-1.49719	0.390617
Bradi1g60662	2	4.42653	3.18346	2.20179	1.65583	2.33223	5.49591		0.719179	0.497408	0.374069	0.526876	1.24159		0.81959	-0.022	-0.686622	-1.05625	-0.59831	1.5436
Bradi1g61250	2	89.8342	81.5023	87.3004	35.3494	16.4501	127.65		0.907252	0.971795	0.393496	0.183117	1.42095		0.416294	0.210077	0.353582	-0.932219	-1.39998	1.35225
Bradi1g61757	2	18.2997	14.9884	9.91555	7.25504	6.01556	19.8787		0.819051	0.541842	0.396457	0.328724	1.08628		0.955395	0.387852	-0.48161	-0.937607	-1.15005	1.22602
Bradi1g62170	2	343.963	332.131	284.044	142.181	47.8475	275.92		0.965603	0.825799	0.413363	0.139107	0.80218		0.904824	0.804099	0.394709	-0.813035	-1.61614	0.325546
Bradi1g62410	2	23.9642	26.2714	16.4069	10.6099	8.35943	32.3866		1.09627	0.684643	0.442741	0.34883	1.35146		0.455877	0.700601	-0.345741	-0.960641	-1.19936	1.34926
Bradi1g62720	2	95.3169	87.4284	88.5288	46.6884	40.7978	135.173		0.917239	0.928784	0.489823	0.428022	1.41815		0.374477	0.147147	0.178858	-1.02689	-1.19664	1.52305
Bradi1g63300	2	119.779	87.7996	67.5838	57.1266	43.8852	141.013		0.73301	0.564235	0.476931	0.366383	1.17727		0.890094	0.042451	-0.493379	-0.770552	-1.12152	1.45291
Bradi1g63350	2	41.6228	57.5048	36.7904	18.6536	17.2203	45.7179		1.38157	0.8839	0.448158	0.413723	1.09839		0.340749	1.34831	0.0341787	-1.11643	-1.20736	0.600545
Bradi1g63490	2	118.7	101.636	93.8066	46.3987	21.445	113.237		0.856245	0.790284	0.390891	0.180665	0.95398		0.916744	0.484167	0.285685	-0.916134	-1.54873	0.778264
Bradi1g63810	2	4.18797	5.6001	2.67107	1.27016	1.94506	3.63007		1.33719	0.637796	0.303288	0.464441	0.866784		0.613873	1.50703	-0.345551	-1.23161	-0.804744	0.261004
Bradi1g63840	2	7.39235	4.56669	3.06317	1.12868	1.35903	7.85207		0.61776	0.41437	0.152682	0.183843	1.06219		1.08628	0.116576	-0.3994	-1.06328	-0.984222	1.24404
Bradi1g64010	2	59.4591	52.0375	33.4009	15.2571	15.3651	54.1467		0.875181	0.561745	0.256598	0.258415	0.910654		1.0675	0.693467	-0.245785	-1.1602	-1.15475	0.799765
Bradi1g64130	2	269.23	286.475	251.84	115.952	46.4774	286.338		1.06405	0.935409	0.43068	0.172631	1.06355		0.583928	0.752195	0.414247	-0.911669	-1.58956	0.75086
Bradi1g64381	2	72.5697	92.3974	60.3763	46.7607	26.3254	114.644		1.27322	0.831977	0.644355	0.36276	1.57978		0.117372	0.742288	-0.266931	-0.696058	-1.34012	1.44345
Bradi1g64770	2	3.82433	4.5421	3.24884	1.41558	1.87017	6.89812		1.18769	0.84952	0.370151	0.48902	1.80375		0.0963031	0.457946	-0.19365	-1.11733	-0.888282	1.64501
Bradi1g65467	2	156.842	142.889	100.441	48.8613	43.3347	207.429		0.911032	0.640392	0.311531	0.276294	1.32253		0.623754	0.407293	-0.251182	-1.05131	-1.13704	1.40849
Bradi1g65900	2	192.295	150.524	137.116	73.9846	44.6387	155.794		0.782775	0.71305	0.384745	0.232136	0.810182		1.20214	0.44782	0.205696	-0.934353	-1.46429	0.542991
Bradi1g66296	2	135.906	133.519	105.495	74.4866	60.9153	178.955		0.98244	0.776236	0.548075	0.448217	1.31676		0.48169	0.427018	-0.21499	-0.925363	-1.23627	1.46791
Bradi1g66710	2	70.4019	70.4768	99.3264	26.5059	22.9829	76.3937		1.00106	1.41085	0.376495	0.326453	1.08511		0.312242	0.314736	1.27434	-1.14784	-1.26502	0.511545
Bradi1g66980	2	120.347	119.419	83.6976	19.9201	42.3776	117.603		0.992291	0.695469	0.165522	0.352129	0.977197		0.834382	0.813146	-0.00449614	-1.46432	-0.950281	0.771568
Bradi1g67020	2	384.446	442.835	304.861	216.988	130.476	535.504		1.15188	0.792987	0.564416	0.339387	1.39292		0.326239	0.718233	-0.208057	-0.797993	-1.37879	1.34036
Bradi1g67170	2	83.485	85.5668	76.9057	35.515	7.48261	93.1196		1.02494	0.921192	0.425405	0.0896282	1.11541		0.578324	0.639113	0.386211	-0.822382	-1.64092	0.859651
Bradi1g67270	2	48.8794	40.3265	32.3559	27.7537	18.0852	44.221		0.82502	0.661955	0.5678	0.369996	0.904696		1.19249	0.443046	-0.255369	-0.658633	-1.50583	0.784302
Bradi1g67620	2	11.1244	11.006	6.38398	2.36374	0.586095	19.8347		0.989363	0.573873	0.212483	0.0526857	1.783		0.366754	0.349897	-0.308533	-0.88123	-1.13446	1.60758
Bradi1g68970	2	12.5467	10.904	9.68486	4.79328	4.32321	17.412		0.869076	0.771905	0.382035	0.34457	1.38777		0.527642	0.194625	-0.052537	-1.04421	-1.1395	1.51398
Bradi1g69044	2	16.5039	13.6679	9.42988	7.14078	5.73355	15.0987		0.828158	0.571372	0.432672	0.347405	0.914855		1.17858	0.540871	-0.412065	-0.926787	-1.24321	0.862609
Bradi1g69650	2	215.864	180.725	157.916	69.0609	25.6684	171.587		0.837217	0.731552	0.319929	0.11891	0.794886		1.08038	0.600196	0.288504	-0.925718	-1.51869	0.475327
Bradi1g70380	2	19.5337	13.5207	10.1834	4.26084	2.80059	12.0612		0.692174	0.521326	0.218128	0.143372	0.617457		1.47728	0.505443	-0.0339396	-0.991164	-1.22717	0.269555
Bradi1g70420	2	19.5748	16.7032	11.5234	2.46112	0.974227	12.6704		0.853305	0.588688	0.125729	0.0497695	0.647282		1.18861	0.806129	0.116181	-1.09091	-1.28897	0.268954
Bradi1g70810	2	13.8067	9.55278	10.1717	7.73492	6.21837	10.0608		0.691893	0.736717	0.560228	0.450386	0.72869		1.63726	-0.0147975	0.22555	-0.720779	-1.30975	0.18251
Bradi1g71310	2	104.046	78.3697	47.1466	31.6408	27.839	83.3269		0.75322	0.453132	0.304104	0.267564	0.800864		1.35506	0.526346	-0.48138	-0.98183	-1.10453	0.686341
Bradi1g71370	2	32.0783	23.2132	24.7069	16.2091	9.64366	26.2034		0.723642	0.770206	0.505297	0.300629	0.816859		1.27011	0.151883	0.340296	-0.731604	-1.55975	0.529066
Bradi1g71420	2	15.7681	19.1836	13.9335	9.35412	4.54786	23.0715		1.21661	0.883653	0.593231	0.288422	1.46317		0.21854	0.730387	-0.0563857	-0.742646	-1.4629	1.31301
Bradi1g71425	2	63.9403	63.7129	50.6147	28.7506	14.503	64.1086		0.996443	0.791592	0.449648	0.22682	1.00263		0.768524	0.757825	0.141595	-0.887038	-1.55735	0.77644
Bradi1g72780	2	122.293	104.357	79.5603	55.313	46.087	110.704		0.853336	0.650573	0.452301	0.376859	0.905239		1.15413	0.57763	-0.21938	-0.998738	-1.29528	0.781644
Bradi1g73200	2	64.5465	50.9259	28.7358	18.1345	6.74505	53.1007		0.78898	0.445195	0.280952	0.104499	0.822673		1.21802	0.615074	-0.367226	-0.836518	-1.3407	0.711346
Bradi1g76040	2	24.4656	22.7305	21.1733	11.8497	9.90302	31.7389		0.92908	0.865435	0.484343	0.404774	1.29729		0.508138	0.295964	0.105553	-1.03458	-1.27263	1.39755
Bradi1g76130	2	331.834	330.212	286.152	161.162	154.776	277.559		0.995114	0.862335	0.48567	0.466428	0.836442		0.938003	0.917694	0.365793	-1.19984	-1.27982	0.258164
Bradi1g76470	2	1356.75	1274.95	837.212	553.229	381.99	1985.04		0.939705	0.61707	0.407759	0.281547	1.46308		0.492546	0.354505	-0.384144	-0.863346	-1.1523	1.55274
Bradi1g76550	2	138.469	92.1265	63.8958	40.8399	28.5288	157.59		0.665324	0.461446	0.29494	0.206031	1.13809		0.983516	0.0995369	-0.438964	-0.878756	-1.11359	1.34826
Bradi1g76600	2	39.6589	33.4455	22.9823	16.3899	11.2624	31.6765		0.84333	0.5795	0.413271	0.283983	0.798723		1.26335	0.692728	-0.268191	-0.87363	-1.34452	0.530263
Bradi1g76787	2	22.8884	23.2784	18.9095	7.97411	2.24413	36.8739		1.01704	0.826161	0.34839	0.0980465	1.61103		0.34135	0.373091	0.0174817	-0.872618	-1.33902	1.47971
Bradi1g76880	2	151.57	158.264	121.75	68.8077	38.3183	217.776		1.04416	0.803262	0.453967	0.25281	1.4368		0.392418	0.495473	-0.0666748	-0.881761	-1.35116	1.41171
Bradi1g77047	2	174.043	188.956	126.282	55.0768	34.7195	189.771		1.08568	0.725579	0.316455	0.199487	1.09036		0.667096	0.883822	-0.0270202	-1.06185	-1.35771	0.895662
Bradi1g77060	2	85.1014	71.1908	68.1621	24.6441	8.14297	85.9006		0.836541	0.800952	0.289585	0.0956855	1.00939		0.85052	0.426629	0.334338	-0.991766	-1.4946	0.874874
Bradi1g77350	2	52.8454	48.8673	38.8826	19.7634	12.5485	39.6616		0.92472	0.73578	0.373984	0.237457	0.750521		1.08744	0.839064	0.215679	-0.978021	-1.42848	0.264314
Bradi1g77380	2	399.972	336.456	227.484	115.851	121.439	365.462		0.8412	0.568749	0.289649	0.303618	0.913719		1.11473	0.604849	-0.269946	-1.16609	-1.12124	0.837694
Bradi1g77400	2	17.3283	14.0546	11.1433	4.69582	3.55326	27.8513		0.811081	0.643073	0.270992	0.205055	1.60728		0.471067	0.105971	-0.218714	-0.937782	-1.06521	1.64467
Bradi1g77950	2	140.014	128.071	97.698	54.3545	35.3082	102.967		0.914702	0.697772	0.388207	0.252176	0.735401		1.14648	0.854812	0.113051	-0.94546	-1.4106	0.24172
Bradi1g78040	2	225.161	274.825	228.236	122.681	107.819	239.24		1.22057	1.01366	0.544858	0.478854	1.06253		0.375627	1.10719	0.420928	-1.13392	-1.35284	0.583008
Bradi1g78340	2	7.81346	4.881	3.216	2.13909	0.864055	9.72333		0.624691	0.411597	0.27377	0.110585	1.24443		0.889673	0.0316526	-0.455518	-0.770615	-1.14368	1.44849
Bradi1g78660	2	77.8113	71.3491	53.5276	39.6971	36.2039	103.741		0.916951	0.687915	0.510171	0.465278	1.33324		0.548724	0.297054	-0.397011	-0.935642	-1.07168	1.55856
Bradi1g78697	2	12.3703	13.3039	7.41237	3.71483	1.20116	20.3895		1.07547	0.599205	0.300301	0.0970996	1.64826		0.37487	0.507522	-0.329592	-0.854963	-1.21212	1.51429
Bradi2g00245	2	52.5214	39.628	31.7595	25.7553	30.8597	61.0448		0.754511	0.604697	0.490378	0.587565	1.16228		0.887675	-0.0458682	-0.615579	-1.05031	-0.680728	1.50481
Bradi2g01890	2	19.4063	19.5508	16.6894	6.38294	3.20116	37.6567		1.00744	0.86	0.328911	0.164955	1.94044		0.185379	0.197238	-0.0376326	-0.883625	-1.1448	1.68344
Bradi2g01900	2	4.92511	4.20467	3.5006	1.20589	0.900075	7.16927		0.853721	0.710765	0.244844	0.182752	1.45566		0.539625	0.234512	-0.0636688	-1.0355	-1.16501	1.49005
Bradi2g02770	2	68.1558	66.9366	57.1498	32.6523	23.5983	95.0515		0.982112	0.838517	0.479084	0.346241	1.39462		0.419218	0.372321	-0.00413976	-0.946458	-1.29473	1.45379
Bradi2g03400	2	32.0293	26.7044	17.9929	4.50318	2.69129	27.0599		0.83375	0.561765	0.140596	0.084026	0.844849		1.09068	0.66151	-0.0406128	-1.12785	-1.27389	0.690163
Bradi2g03657	2	8.41549	7.03931	5.14286	3.36141	3.95055	8.41277		0.836472	0.611118	0.399431	0.469438	0.999677		1.06442	0.444191	-0.410521	-1.2134	-0.947878	1.06319
Bradi2g03680	2	136.405	148.609	119.37	69.8167	43.5426	140.068		1.08947	0.875116	0.511834	0.319216	1.02686		0.623721	0.908084	0.226815	-0.927757	-1.53993	0.709071
Bradi2g03717	2	48.596	70.1241	42.4074	26.0308	16.2632	52.0563		1.443	0.872652	0.535657	0.334662	1.07121		0.312678	1.43152	-0.00895285	-0.860067	-1.3677	0.492516
Bradi2g03970	2	41.0766	48.9258	34.7671	24.2681	18.3782	44.2183		1.19109	0.846398	0.590801	0.447413	1.07648		0.488147	1.14829	-0.0424909	-0.92548	-1.42083	0.752373
Bradi2g04720	2	44.2341	32.5345	20.2806	31.2932	30.8059	42.6887		0.735508	0.458484	0.707446	0.696429	0.965065		1.2037	-0.125543	-1.51776	-0.266572	-0.321943	1.02813
Bradi2g05816	2	34.7097	34.9596	29.5274	16.4015	17.7894	52.1839		1.0072	0.850696	0.472533	0.512521	1.50344		0.286979	0.305952	-0.106348	-1.10258	-0.997239	1.61324
Bradi2g06080	2	176.084	188.346	170.321	103.966	41.2966	156.409		1.06963	0.967268	0.59043	0.234527	0.888259		0.65115	0.868808	0.548836	-0.629089	-1.74157	0.301868
Bradi2g06730	2	535.82	344.424	287.156	123.685	61.7586	329.885		0.642797	0.535919	0.230832	0.11526	0.615664		1.50373	0.376684	0.0394626	-0.923146	-1.2878	0.291072
Bradi2g07810	2	8.33482	3.97355	1.94148	0.754814	0.717042	10.2978		0.476742	0.232936	0.0905616	0.0860297	1.23552		0.979436	-0.0889318	-0.586724	-0.877418	-0.886671	1.46031
Bradi2g08030	2	167.61	141.299	93.5547	59.2795	44.8922	174.919		0.843022	0.55817	0.353675	0.267837	1.04361		0.969633	0.497341	-0.359682	-0.974934	-1.23319	1.10083
Bradi2g08340	2	659.277	669.401	476.559	395.005	221.563	789.628		1.01536	0.72285	0.599149	0.336069	1.19772		0.591868	0.640174	-0.28	-0.669146	-1.49675	1.21386
Bradi2g09200	2	129.598	128.295	97.1791	52.3937	29.7408	154.066		0.989942	0.749849	0.404278	0.229485	1.1888		0.639269	0.612436	-0.0281302	-0.950108	-1.41645	1.14299
Bradi2g09910	2	64.37	53.5029	47.9232	32.4839	31.0025	62.5679		0.831178	0.744496	0.504644	0.48163	0.972005		1.09177	0.337438	-0.0498769	-1.12159	-1.22443	0.966686
Bradi2g10040	2	68.088	71.8868	68.4317	32.6092	33.6569	84.5724		1.05579	1.00505	0.478927	0.494314	1.2421		0.380849	0.556986	0.396784	-1.26418	-1.21561	1.14517
Bradi2g10740	2	77.0111	70.1302	56.3249	22.0413	8.91136	86.1448		0.910651	0.731387	0.28621	0.115715	1.1186		0.75484	0.534607	0.0927439	-1.00456	-1.42481	1.04718
Bradi2g12020	2	41.0549	32.6553	26.8074	19.4754	15.4661	37.6097		0.795405	0.652965	0.474374	0.376717	0.916082		1.20738	0.376795	-0.201463	-0.926478	-1.32293	0.8667
Bradi2g12600	2	27.5378	26.6099	21.8746	13.5228	8.17966	23.5359		0.966303	0.794349	0.491062	0.297034	0.854678		0.949271	0.829061	0.21563	-0.866317	-1.5585	0.430849
Bradi2g12790	2	74.6796	89.4161	64.1471	32.5122	21.2887	79.5066		1.19733	0.858964	0.435355	0.285067	1.06464		0.527841	1.06722	0.142334	-1.01555	-1.42635	0.704514
Bradi2g13580	2	26.8479	25.0511	20.604	9.56884	13.2172	41.994		0.933075	0.767434	0.356409	0.4923	1.56414		0.344917	0.188707	-0.197913	-1.15729	-0.840102	1.66168
Bradi2g13660	2	123.95	112.098	90.4345	60.0397	48.8567	137.615		0.904378	0.729602	0.484385	0.394163	1.11024		0.800426	0.466982	-0.142484	-0.997586	-1.3122	1.18486
Bradi2g13860	2	21.6743	12.0168	8.0104	10.7434	12.7322	19.3914		0.554427	0.369581	0.495673	0.587435	0.894673		1.43276	-0.392794	-1.15012	-0.633513	-0.257555	1.00123
Bradi2g14210	2	279.532	303.272	245.755	142.737	84.4892	312.654		1.08493	0.879167	0.510628	0.302253	1.11849		0.550632	0.804664	0.189206	-0.91314	-1.53642	0.905055
Bradi2g14391	2	20.3187	19.0298	10.0246	7.18988	4.14019	25.9535		0.936568	0.493368	0.353856	0.203763	1.27732		0.686472	0.535897	-0.516169	-0.847342	-1.20363	1.34477
Bradi2g14665	2	11.2532	6.21705	5.48819	3.84327	5.57648	11.3743		0.55247	0.4877	0.341527	0.495546	1.01076		1.23302	-0.334634	-0.561516	-1.07355	-0.534031	1.27071
Bradi2g15630	2	550.078	626.38	412.158	332.167	171.02	706.395		1.13871	0.749272	0.603855	0.310902	1.28417		0.420238	0.803283	-0.272131	-0.673691	-1.48266	1.20496
Bradi2g15870	2	41.0434	31.8544	25.1023	14.73	13.462	45.7565		0.776115	0.611604	0.358888	0.327994	1.11483		0.926485	0.2391	-0.265991	-1.04189	-1.13675	1.27905
Bradi2g15980	2	170.077	162.754	134.703	93.597	81.7564	184.889		0.956946	0.79201	0.550321	0.480702	1.08709		0.757522	0.584795	-0.0769005	-1.04652	-1.32582	1.10692
Bradi2g16337	2	86.1627	69.6846	105.492	34.4006	18.0065	103.398		0.808756	1.22434	0.399251	0.208983	1.20004		0.457763	0.004414	0.989554	-0.966324	-1.41736	0.931951
Bradi2g16350	2	10.4405	10.9307	9.94262	3.29612	1.20611	19.0981		1.04695	0.952313	0.315705	0.115522	1.82923		0.202764	0.27992	0.124394	-0.921809	-1.25079	1.56552
Bradi2g16396	2	13.5303	13.0714	8.86138	5.12857	8.17545	12.2155		0.966086	0.654929	0.379043	0.604233	0.902825		1.01504	0.876689	-0.392684	-1.51816	-0.599498	0.618615
Bradi2g16850	2	45.623	36.5541	29.9261	19.0703	23.3979	49.012		0.801221	0.655944	0.417997	0.512853	1.07428		0.975151	0.218805	-0.33397	-1.23935	-0.878426	1.25779
Bradi2g17200	2	49.1227	32.6795	24.1572	10.0785	10.3214	35.651		0.665263	0.491774	0.20517	0.210115	0.725753		1.44665	0.371311	-0.186021	-1.10673	-1.09084	0.565635
Bradi2g18810	2	51.8236	49.2094	39.8193	16.7874	14.81	52.5795		0.949557	0.768362	0.323934	0.285778	1.01459		0.821534	0.671548	0.132789	-1.18866	-1.30211	0.864904
Bradi2g20447	2	68.0226	70.0163	63.6604	10.1004	21.2001	75.6562		1.02931	0.935871	0.148486	0.311663	1.11222		0.587716	0.658388	0.433087	-1.46548	-1.07202	0.858309
Bradi2g21120	2	1135.3	1128.51	831.423	442.225	232.074	990.003		0.994021	0.732338	0.389523	0.204416	0.872019		0.90916	0.891119	0.101449	-0.933049	-1.49164	0.522958
Bradi2g21500	2	99.689	73.3607	46.2616	34.4795	30.7594	123.287		0.735896	0.464059	0.345871	0.308553	1.23672		0.843286	0.143256	-0.577272	-0.89054	-0.989453	1.47072
Bradi2g21728	2	5.90078	6.74174	6.00087	2.38079	3.08906	6.01452		1.14252	1.01696	0.40347	0.5235	1.01928		0.485833	0.950385	0.541122	-1.45863	-1.06738	0.548664
Bradi2g22180	2	10.467	11.4749	8.38458	5.065	6.18439	14.1052		1.09629	0.801052	0.483904	0.590849	1.3476		0.349479	0.646281	-0.263729	-1.24126	-0.911628	1.42086
Bradi2g25130	2	79.6299	70.5556	48.4667	24.5528	30.0631	92.628		0.886044	0.608649	0.308337	0.377535	1.16323		0.795863	0.467305	-0.332482	-1.19834	-0.99883	1.26649
Bradi2g25410	2	12.9183	12.9516	11.8443	5.45069	2.63281	20.0836		1.00258	0.916864	0.421935	0.203805	1.55466		0.313153	0.318531	0.13962	-0.893452	-1.34876	1.47091
Bradi2g25640	2	52.2386	41.8502	19.9309	13.0071	9.43496	59.8004		0.801136	0.381536	0.248994	0.180613	1.14476		0.912088	0.426886	-0.596878	-0.920265	-1.0871	1.26527
Bradi2g25745	2	389.732	378.822	306.014	184.343	168.837	342.404		0.972007	0.785191	0.472999	0.433213	0.878562		0.981737	0.868644	0.113911	-1.14734	-1.30808	0.491129
Bradi2g25820	2	188.183	171.193	139.99	91.9131	89.6609	216.446		0.909713	0.743905	0.488424	0.476456	1.15019		0.74498	0.417224	-0.184692	-1.11213	-1.15558	1.2902
Bradi2g25910	2	344.005	340.353	255.715	217.668	165.576	378.001		0.989385	0.743347	0.632747	0.481318	1.09882		0.724245	0.680496	-0.333513	-0.789332	-1.41342	1.13153
Bradi2g26240	2	119.736	84.6217	79.7994	56.687	48.3429	165.592		0.706733	0.666458	0.473431	0.403744	1.38297		0.62438	-0.179519	-0.289917	-0.81904	-1.01006	1.67416
Bradi2g26277	2	4.01278	4.49274	4.79135	2.10688	1.66382	5.23803		1.11961	1.19402	0.525043	0.414629	1.30534		0.199328	0.52343	0.725076	-1.08768	-1.38686	1.02671
Bradi2g26710	2	23.3872	20.0918	15.3256	13.4125	10.2177	21.2267		0.859096	0.655298	0.573499	0.436892	0.907624		1.20094	0.553253	-0.383527	-0.759526	-1.38745	0.776317
Bradi2g26940	2	489.344	457.446	391.256	189.2	96.6397	427.299		0.934815	0.799552	0.386641	0.197488	0.873209		0.920708	0.721571	0.308349	-0.953072	-1.53092	0.533367
Bradi2g30370	2	47.8299	43.9682	34.7432	16.3824	17.3929	66.1353		0.91926	0.726391	0.342514	0.363641	1.38272		0.52788	0.325801	-0.156918	-1.1177	-1.06482	1.48576
Bradi2g31560	2	69.5512	63.3904	46.9361	30.2932	21.5686	89.6952		0.91142	0.674843	0.435553	0.310111	1.28963		0.625127	0.384101	-0.259629	-0.91074	-1.25207	1.41321
Bradi2g31660	2	87.687	89.7418	75.9333	47.4252	27.2814	75.0137		1.02343	0.865958	0.540846	0.311123	0.855471		0.830329	0.913527	0.354412	-0.799904	-1.61554	0.317176
Bradi2g31930	2	19.4813	17.2716	15.9609	10.6603	9.42225	19.0177		0.886575	0.819292	0.547208	0.483656	0.976201		0.975802	0.459837	0.153771	-1.08393	-1.37302	0.86754
Bradi2g31937	2	22.824	26.8711	16.4678	9.34361	5.46914	19.7673		1.17732	0.721514	0.409377	0.239623	0.866076		0.741978	1.23968	-0.0396807	-0.915793	-1.39226	0.366079
Bradi2g34280	2	7.14782	4.32912	4.83861	4.25998	2.64343	5.03887		0.605655	0.676935	0.595983	0.369823	0.704952		1.6678	-0.260291	0.0882224	-0.30758	-1.41336	0.225207
Bradi2g34580	2	309.199	414.288	287.057	165.5	148.158	474.36		1.33987	0.928388	0.535253	0.479166	1.53416		0.0724531	0.879104	-0.0975104	-1.03057	-1.16369	1.34021
Bradi2g36130	2	41.7021	40.2093	40.112	19.0212	10.4572	53.9214		0.964203	0.961869	0.456121	0.25076	1.29301		0.461116	0.368903	0.362892	-0.93991	-1.46892	1.21591
Bradi2g36970	2	28.6317	28.1903	20.4625	10.6131	6.79738	28.1813		0.984584	0.714678	0.370676	0.237407	0.984268		0.841046	0.795511	-0.0017454	-1.01787	-1.41152	0.794578
Bradi2g37222	2	5.9495	3.79581	2.84797	3.08675	2.7837	4.88816		0.638004	0.478691	0.518825	0.467887	0.821608		1.60649	-0.0750917	-0.815152	-0.628716	-0.865337	0.777805
Bradi2g38130	2	32.4462	28.2118	20.8761	14.1826	17.3477	26.7805		0.869495	0.643407	0.437111	0.53466	0.825382		1.30733	0.701587	-0.347816	-1.30536	-0.852575	0.49683
Bradi2g38237	2	58.5381	51.9613	33.5705	32.132	20.9724	62.8245		0.887649	0.573481	0.548907	0.358269	1.07322		0.906625	0.51447	-0.582114	-0.667891	-1.3333	1.16221
Bradi2g39190	2	65.4927	64.123	54.0835	23.1831	18.4049	111.012		0.979086	0.825794	0.353979	0.281022	1.69502		0.280257	0.239605	-0.0583587	-0.975452	-1.11726	1.63121
Bradi2g39740	2	236.803	130.679	76.503	79.9875	32.6647	141.852		0.551845	0.323065	0.33778	0.13794	0.59903		1.69316	0.200608	-0.561329	-0.512322	-1.17788	0.357757
Bradi2g40040	2	178.157	163.302	141.26	65.8467	27.0616	148.392		0.916617	0.792898	0.3696	0.151898	0.832927		0.955922	0.708903	0.342388	-0.911624	-1.55656	0.460973
Bradi2g41027	2	10.2182	10.2162	6.8862	3.77967	2.09576	8.34954		0.999806	0.673913	0.369895	0.2051	0.817122		0.976243	0.975656	-0.0112848	-0.93198	-1.43105	0.422413
Bradi2g41260	2	6.58985	6.43096	4.99235	2.99153	3.13725	8.91314		0.975889	0.757582	0.453961	0.476074	1.35256		0.475404	0.405507	-0.227362	-1.10756	-1.04345	1.49746
Bradi2g41560	2	37.6226	43.2125	33.5436	13.2602	3.47497	46.4476		1.14858	0.891581	0.352454	0.0923639	1.23457		0.463778	0.786666	0.228164	-0.943459	-1.50868	0.973534
Bradi2g41630	2	179.216	167.815	126.291	96.4452	71.2409	161.751		0.936382	0.704687	0.53815	0.397514	0.90255		1.04948	0.786056	-0.173331	-0.862917	-1.44526	0.645965
Bradi2g41890	2	40.7976	42.7175	31.7429	24.2319	14.8036	42.4266		1.04706	0.778059	0.593954	0.362856	1.03993		0.700777	0.868728	-0.091307	-0.748358	-1.57312	0.843283
Bradi2g42040	2	67.5384	57.8908	30.0788	23.5222	6.28099	56.5304		0.857154	0.445358	0.348278	0.0929988	0.837011		1.13899	0.73547	-0.427806	-0.702045	-1.42318	0.678569
Bradi2g42300	2	104.644	91.333	60.2469	22.5215	14.689	90.7153		0.872795	0.57573	0.21522	0.140371	0.866892		1.0646	0.715719	-0.0990221	-1.08777	-1.29305	0.69953
Bradi2g42360	2	263.971	239.68	193.726	97.7831	68.3529	217.21		0.907982	0.733892	0.370432	0.258941	0.822857		1.05792	0.751454	0.171657	-1.03883	-1.41015	0.467951
Bradi2g42650	2	14.3001	13.9157	14.4737	6.72307	5.58995	14.791		0.973123	1.01214	0.470142	0.390903	1.03433		0.625369	0.535273	0.666077	-1.15078	-1.4164	0.740454
Bradi2g43437	2	28.8051	27.4786	22.5857	16.915	14.072	27.6837		0.953951	0.784087	0.587223	0.488524	0.96107		0.947763	0.734022	-0.0544094	-0.968163	-1.42628	0.767066
Bradi2g43710	2	44.8039	45.1448	42.3857	11.7682	8.79174	88.2419		1.00761	0.946029	0.262659	0.196227	1.96952		0.160108	0.171938	0.0762067	-0.986123	-1.0894	1.66727
Bradi2g43740	2	190.841	180.741	128.678	85.8857	89.8868	242.949		0.947077	0.67427	0.450039	0.471005	1.27305		0.605317	0.443053	-0.393381	-1.08088	-1.0166	1.44249
Bradi2g43750	2	12.9484	10.5979	6.82308	3.84367	4.48769	16.702		0.818476	0.526945	0.296846	0.346584	1.28989		0.731808	0.268748	-0.474934	-1.0619	-0.935027	1.47131
Bradi2g44170	2	12.4837	9.71922	7.22329	7.49313	4.31648	14.8725		0.778553	0.578617	0.600233	0.345769	1.19136		0.815519	0.0957665	-0.554066	-0.483811	-1.31087	1.43747
Bradi2g44440	2	244.716	191.526	155.453	87.7358	66.624	184.171		0.782649	0.635237	0.358521	0.27225	0.75259		1.3348	0.543112	0.00617669	-1.00174	-1.31597	0.433628
Bradi2g44920	2	55.425	50.4983	40.4171	28.5444	27.153	44.7431		0.911109	0.729221	0.515009	0.489905	0.807273		1.24475	0.815741	-0.0620886	-1.09592	-1.21708	0.314606
Bradi2g44970	2	10.0703	7.02828	7.07795	4.66478	6.99568	9.72518		0.697923	0.702855	0.463223	0.694686	0.96573		1.23219	-0.281313	-0.256602	-1.45724	-0.29753	1.06049
Bradi2g45490	2	5.3749	5.0781	3.41225	1.89793	1.86725	6.97011		0.94478	0.634849	0.35311	0.347401	1.29679		0.620175	0.475785	-0.334623	-1.07131	-1.08624	1.39621
Bradi2g45730	2	443.735	417.405	348.529	177.247	66.2304	453.692		0.940662	0.785444	0.399442	0.149257	1.02244		0.786337	0.621921	0.191841	-0.877696	-1.57091	0.848509
Bradi2g45870	2	246.779	359.364	208.146	128.133	99.7851	323.748		1.45622	0.84345	0.519222	0.40435	1.31189		0.184697	1.27225	-0.188498	-0.961411	-1.23525	0.928209
Bradi2g45950	2	5.3483	4.83033	4.47646	2.17134	2.68687	4.36193		0.903153	0.836988	0.405987	0.502379	0.815574		1.08706	0.67579	0.39482	-1.43544	-1.02611	0.303883
Bradi2g46486	2	7.88469	4.36198	5.52029	3.92247	5.81562	7.26556		0.553222	0.700128	0.49748	0.737584	0.921477		1.33964	-0.918774	-0.176184	-1.20055	0.0131541	0.942713
Bradi2g46520	2	129.76	111.012	97.9133	54.1867	41.2656	145.248		0.855519	0.754573	0.417592	0.318015	1.11936		0.803393	0.349661	0.032649	-1.02561	-1.33833	1.17823
Bradi2g46690	2	167.487	147.925	120.045	61.718	29.535	121.341		0.883201	0.716745	0.368494	0.176342	0.724478		1.13402	0.761047	0.229499	-0.882579	-1.49618	0.254193
Bradi2g47550	2	7.45844	8.57536	7.92474	2.21953	4.88954	8.09571		1.14975	1.06252	0.297586	0.655571	1.08544		0.375729	0.826382	0.563869	-1.73806	-0.660769	0.632851
Bradi2g48010	2	2368.66	2481.63	1542.17	436.228	156.539	2386.72		1.04769	0.651072	0.184166	0.0660875	1.00762		0.774811	0.883315	-0.0190395	-1.0813	-1.34994	0.792155
Bradi2g48150	2	134.515	201.796	174.48	109.375	44.0843	180.244		1.50018	1.2971	0.813107	0.327728	1.33996		-0.107576	1.05342	0.582053	-0.541389	-1.66804	0.681527
Bradi2g48367	2	47.8827	44.5665	36.8674	19.1817	10.2146	83.4571		0.930742	0.769951	0.400598	0.213326	1.74295		0.292708	0.163644	-0.135993	-0.82429	-1.17328	1.67721
Bradi2g48657	2	72.1471	53.4815	32.7825	33.0775	17.9621	71.157		0.741284	0.454384	0.458474	0.248965	0.986277		1.13572	0.300431	-0.62585	-0.612646	-1.28906	1.09141
Bradi2g49040	2	12.6226	11.0372	7.64608	5.96883	5.24555	10.3047		0.874404	0.605747	0.472869	0.415569	0.816369		1.2892	0.753949	-0.390998	-0.957288	-1.20149	0.506619
Bradi2g49310	2	43.713	46.3499	34.7587	26.1133	20.6568	37.5148		1.06032	0.795157	0.59738	0.472556	0.858207		0.89004	1.15487	-0.00927713	-0.877575	-1.42559	0.267529
Bradi2g49660	2	4.91928	4.89999	5.61557	2.31481	1.13497	6.90377		0.99608	1.14154	0.470559	0.230718	1.40341		0.288314	0.279363	0.611477	-0.92046	-1.46804	1.20935
Bradi2g49690	2	49.4866	22.5717	22.1898	27.1845	18.943	49.7211		0.456116	0.448401	0.54933	0.382791	1.00474		1.26017	-0.644893	-0.671917	-0.318394	-0.901729	1.27677
Bradi2g49850	2	136.626	128.444	110.864	53.3989	45.8383	166.272		0.940114	0.811444	0.390841	0.335503	1.21699		0.620232	0.449473	0.0825834	-1.11673	-1.27452	1.23895
Bradi2g50390	2	110.537	91.274	63.6442	59.5313	50.037	103.578		0.825732	0.575772	0.538565	0.452672	0.93704		1.2164	0.454897	-0.63736	-0.799948	-1.17528	0.941285
Bradi2g50520	2	6.42035	5.55314	3.84662	3.29557	2.64614	5.86641		0.864928	0.599129	0.5133	0.412149	0.913721		1.17629	0.614456	-0.491138	-0.848141	-1.26888	0.817412
Bradi2g50750	2	36.1684	32.6611	27.1443	9.9878	23.8237	28.6843		0.903029	0.750499	0.276147	0.658689	0.793076		1.06916	0.684824	0.0802943	-1.79973	-0.283582	0.24904
Bradi2g50810	2	157.963	132.087	105.035	71.4715	68.4921	150.595		0.836185	0.66493	0.452456	0.433594	0.953353		1.12367	0.458134	-0.237628	-1.10085	-1.17748	0.934159
Bradi2g51247	2	13.7125	10.7532	7.04905	4.5351	6.51654	13.5149		0.784189	0.514061	0.330728	0.475227	0.985592		1.1283	0.363462	-0.59388	-1.24362	-0.731507	1.07724
Bradi2g51540	2	109.747	122.144	105.069	13.9073	25.3542	111.628		1.11296	0.957372	0.126721	0.231023	1.01713		0.589573	0.846572	0.492588	-1.39729	-1.15999	0.62855
Bradi2g52110	2	5.59144	4.78932	4.50626	2.76621	1.82604	4.94392		0.856546	0.805922	0.494722	0.326577	0.884195		1.04845	0.495505	0.300377	-0.899148	-1.54727	0.60208
Bradi2g52260	2	29.3728	37.4865	39.8256	27.4028	9.48815	39.9623		1.27623	1.35587	0.932932	0.323026	1.36052		-0.104533	0.59243	0.793362	-0.273753	-1.81261	0.805102
Bradi2g52317	2	8.08987	8.69157	6.94004	1.84966	1.5099	6.34297		1.07438	0.857868	0.228639	0.186641	0.784064		0.805602	0.998019	0.437904	-1.18992	-1.29857	0.246971
Bradi2g52400	2	50.8722	51.0388	43.1952	18.7783	11.162	84.3777		1.00328	0.849093	0.369126	0.219412	1.65862		0.291127	0.29748	-0.00160843	-0.932662	-1.22308	1.56875
Bradi2g52710	2	49.6341	43.7662	39.7758	16.4658	8.60852	41.8258		0.881777	0.80138	0.331744	0.17344	0.842683		0.979003	0.626309	0.386464	-1.0146	-1.48686	0.509681
Bradi2g52720	2	219.991	167.049	118.155	94.0721	97.379	234.845		0.759343	0.537093	0.427618	0.44265	1.06752		1.04658	0.190752	-0.599621	-0.988938	-0.935481	1.28671
Bradi2g52730	2	34.3793	25.1467	15.442	10.4958	8.06153	34.6719		0.73145	0.449165	0.305295	0.234488	1.00851		1.10698	0.321598	-0.503957	-0.924713	-1.13179	1.13188
Bradi2g53330	2	10.5513	10.8607	9.60615	2.31541	1.66382	10.024		1.02932	0.910424	0.219443	0.157688	0.950029		0.70915	0.781139	0.489232	-1.20719	-1.3588	0.586466
Bradi2g54240	2	8.80208	7.26	6.69555	2.23478	4.13343	6.46401		0.824805	0.760679	0.253892	0.469597	0.734374		1.21796	0.563639	0.324139	-1.56863	-0.763007	0.225894
Bradi2g54560	2	6.08753	7.13544	5.14883	2.95925	5.3444	7.31938		1.17214	0.845801	0.486117	0.877927	1.20236		0.263906	0.919673	-0.323513	-1.69372	-0.201129	1.03478
Bradi2g55050	2	130.689	90.9438	74.8289	53.4334	45.962	105.027		0.69588	0.572573	0.40886	0.35169	0.803642		1.47326	0.232905	-0.270002	-0.937705	-1.17087	0.672412
Bradi2g55150	2	704.018	676.107	464.014	147.241	38.6923	555.043		0.960354	0.659095	0.209143	0.0549593	0.788393		0.98376	0.883242	0.119427	-1.02138	-1.4123	0.44725
Bradi2g55750	2	46.3572	35.1933	22.7006	12.9209	9.22903	75.4274		0.759176	0.489688	0.278724	0.199085	1.62709		0.514546	0.0629154	-0.442471	-0.838104	-0.987455	1.69057
Bradi2g56030	2	909.863	801.67	479.445	212.292	159.466	815.57		0.881089	0.526942	0.233323	0.175264	0.896366		1.06134	0.73024	-0.255859	-1.07342	-1.23508	0.772778
Bradi2g56890	2	14.6629	18.0249	8.62481	5.62876	6.64291	19.0015		1.22928	0.588205	0.383877	0.453041	1.29589		0.436063	1.00755	-0.590335	-1.09962	-0.92723	1.17357
Bradi2g56960	2	219.274	197.888	130.193	52.1453	26.3838	185.947		0.902473	0.593746	0.237809	0.120324	0.848015		1.04411	0.778197	-0.0635695	-1.03406	-1.35439	0.629713
Bradi2g57150	2	130.392	114.096	88.1044	37.7463	30.5065	116.684		0.875019	0.675687	0.289482	0.233959	0.894872		1.03383	0.652113	0.0433196	-1.13621	-1.30579	0.712746
Bradi2g57386	2	26.9116	23.7541	20.464	8.21588	7.45221	42.5813		0.88267	0.760414	0.305291	0.276914	1.58226		0.409331	0.167676	-0.0841248	-1.0215	-1.07995	1.60857
Bradi2g57530	2	27.8444	25.3638	21.0722	9.97	6.3552	28.5006		0.910912	0.756786	0.358061	0.22824	1.02357		0.842234	0.58086	0.128676	-1.04113	-1.42201	0.911377
Bradi2g57590	2	167.336	222.057	195.512	117.391	38.5307	178.187		1.32701	1.16838	0.701531	0.23026	1.06485		0.214616	1.04359	0.641453	-0.541998	-1.73666	0.378998
Bradi2g58770	2	152.423	122.467	77.7027	52.459	50.1064	141.004		0.80347	0.509785	0.344168	0.328733	0.925088		1.17606	0.512131	-0.480015	-1.03951	-1.09165	0.922986
Bradi2g58860	2	129.388	126.541	62.2093	50.2693	63.7889	135.136		0.977999	0.480797	0.388517	0.493006	1.04442		0.879806	0.807904	-0.817005	-1.11859	-0.777106	1.02499
Bradi2g58912	2	157.907	148.886	110.14	58.0566	41.9589	197.649		0.942874	0.697497	0.367663	0.265719	1.25168		0.641107	0.492084	-0.148019	-1.00845	-1.27438	1.29766
Bradi2g59110	2	10.8819	14.0945	16.1365	4.79196	5.25781	12.3981		1.29522	1.48287	0.44036	0.483169	1.13933		0.0619348	0.751744	1.1902	-1.2457	-1.14567	0.387491
Bradi2g59210	2	208.709	215.808	177.172	94.6084	45.1361	171.276		1.03401	0.848896	0.453303	0.216263	0.820646		0.834271	0.938929	0.369349	-0.847823	-1.57715	0.282429
Bradi2g59420	2	70.6034	56.6888	45.7174	31.5463	34.9711	94.3879		0.802919	0.647524	0.44681	0.495318	1.33687		0.628148	0.0435407	-0.417414	-1.0128	-0.868908	1.62743
Bradi2g59550	2	416.735	416.229	296.463	193.112	88.5331	451.021		0.998787	0.711396	0.463393	0.212445	1.08227		0.73254	0.729059	-0.0956109	-0.807258	-1.52736	0.968626
Bradi2g59810	2	61.5233	59.9754	55.4827	17.9627	21.5515	57.0304		0.974841	0.901816	0.291966	0.350298	0.926973		0.790741	0.713933	0.490999	-1.37078	-1.1927	0.567799
Bradi2g59950	2	7.92772	7.39078	8.09744	2.99202	1.82395	6.31485		0.93227	1.02141	0.377413	0.230073	0.796553		0.805512	0.60619	0.868514	-1.0267	-1.46031	0.206789
Bradi2g60445	2	59.872	57.9289	34.5315	29.3674	23.1777	54.1675		0.967546	0.576755	0.490503	0.38712	0.904722		1.04258	0.921251	-0.539628	-0.862061	-1.24854	0.686398
Bradi2g60460	2	26.5815	24.7439	19.1949	12.014	12.2879	23.4652		0.930869	0.722117	0.45197	0.462272	0.882765		1.0824	0.792752	-0.0819081	-1.2138	-1.17064	0.591198
Bradi2g60904	2	14.6422	10.7682	9.49359	8.66541	4.47195	13.2519		0.735424	0.648371	0.59181	0.305415	0.905049		1.22742	0.153247	-0.200185	-0.429822	-1.59258	0.84192
Bradi2g61000	2	27.3801	24.7829	22.1199	15.0883	11.6658	34.3339		0.905144	0.807881	0.551069	0.426067	1.25397		0.583014	0.268756	-0.0534762	-0.904296	-1.31843	1.42443
Bradi2g61320	2	42.0084	40.5794	31.9873	18.4927	8.82506	59.6117		0.965982	0.761449	0.440215	0.210078	1.41904		0.465064	0.386174	-0.0881518	-0.833117	-1.36682	1.43685
Bradi2g61960	2	12.4072	11.4011	10.0026	5.85197	4.25659	14.2792		0.918912	0.806197	0.47166	0.343074	1.15088		0.695712	0.437186	0.0778237	-0.988757	-1.39872	1.17675
Bradi2g62250	2	4.81031	5.13132	4.67349	3.26529	2.2105	4.33142		1.06673	0.971557	0.67881	0.459534	0.900445		0.663812	0.951801	0.541065	-0.722286	-1.66857	0.234182
Bradi3g00330	2	435.692	576.68	348.935	209.295	173.63	843.095		1.3236	0.800875	0.480373	0.398515	1.93507		0.0178638	0.581192	-0.32878	-0.886721	-1.02922	1.64567
Bradi3g00660	2	886.535	959.291	734.065	439.398	210.745	841.8		1.08207	0.828016	0.495635	0.237718	0.949539		0.710706	0.959429	0.189477	-0.817863	-1.59952	0.557775
Bradi3g00697	2	6.02381	8.30185	4.09492	0.514073	0.583996	6.76082		1.37817	0.679789	0.0853401	0.0969478	1.12235		0.504029	1.20249	-0.0873791	-1.18529	-1.16385	0.729998
Bradi3g01550	2	76.6968	89.6674	72.5037	42.7273	19.9897	87.2839		1.16912	0.945329	0.557094	0.260634	1.13804		0.429998	0.899261	0.278297	-0.798982	-1.6216	0.813029
Bradi3g01620	2	38.1657	44.5932	37.9141	21.9351	15.7087	37.8914		1.16841	0.993406	0.574735	0.411593	0.992814		0.486782	1.05937	0.464365	-0.959098	-1.51377	0.46235
Bradi3g02200	2	148.662	124.573	93.427	21.1969	27.8349	184.693		0.837958	0.628451	0.142584	0.187236	1.24237		0.739294	0.372832	-0.100975	-1.19977	-1.09879	1.28742
Bradi3g02420	2	122.891	88.7159	75.4093	52.9348	55.587	107.412		0.721905	0.613626	0.430745	0.452327	0.874038		1.39365	0.174478	-0.300223	-1.10198	-1.00736	0.841433
Bradi3g02570	2	158.302	134.815	119.808	53.7358	41.0746	234.094		0.851629	0.75683	0.33945	0.25947	1.47878		0.487841	0.157292	-0.0539059	-0.983766	-1.16195	1.55449
Bradi3g02640	2	23.009	19.3483	14.7963	11.6088	10.9786	29.436		0.840902	0.643064	0.504535	0.477145	1.27933		0.67017	0.160432	-0.473427	-0.917264	-1.00502	1.56511
Bradi3g03210	2	123.582	110.313	87.7649	50.8749	51.2346	156.248		0.892624	0.710173	0.411668	0.414579	1.26433		0.645153	0.327048	-0.213464	-1.09779	-1.08917	1.42822
Bradi3g03270	2	119.873	114.463	93.6398	33.492	14.208	136.635		0.95487	0.781156	0.279395	0.118525	1.13983		0.690069	0.581823	0.165163	-1.03833	-1.42418	1.02546
Bradi3g03360	2	3.56901	3.37387	3.47252	1.86618	1.08252	5.66586		0.945325	0.972965	0.522884	0.303312	1.58752		0.250515	0.127489	0.189682	-0.82306	-1.31713	1.5725
Bradi3g03391	2	8.56651	3.78072	1.64614	2.04215	1.06797	5.71233		0.441337	0.192161	0.238388	0.124668	0.666821		1.65217	-0.00760136	-0.747898	-0.610559	-0.948416	0.662305
Bradi3g04154	2	81.5863	73.3546	50.7225	27.0127	27.1293	102.058		0.899104	0.621704	0.331094	0.332522	1.25092		0.696366	0.426937	-0.313819	-1.08985	-1.08604	1.3664
Bradi3g04315	2	9.69227	6.85105	4.3066	2.6536	1.72939	10.3159		0.706856	0.444333	0.273785	0.17843	1.06435		1.04287	0.256391	-0.447934	-0.905497	-1.16133	1.2155
Bradi3g04387	2	254.272	231.243	174.738	86.374	54.0319	204.439		0.909432	0.68721	0.339692	0.212497	0.804017		1.07664	0.790847	0.0896231	-1.00698	-1.40834	0.458209
Bradi3g04450	2	19.3617	14.9042	16.0872	9.64704	12.3992	15.1698		0.769776	0.830875	0.498254	0.6404	0.783494		1.44149	0.0935386	0.451271	-1.49621	-0.66395	0.17386
Bradi3g04754	2	17.0293	11.7898	14.034	11.099	6.87293	17.0709		0.692326	0.824111	0.651758	0.403594	1.00244		1.03458	-0.304965	0.268798	-0.481589	-1.56204	1.04522
Bradi3g05160	2	139.224	115.064	126.246	79.4668	67.2655	159.924		0.82647	0.906783	0.570785	0.483147	1.14868		0.697213	0.0150386	0.330763	-0.990099	-1.33462	1.2817
Bradi3g05226	2	77.8808	75.4822	62.4028	46.6276	33.4544	79.0021		0.969201	0.80126	0.598704	0.429558	1.0144		0.818117	0.690736	-0.00383419	-0.841563	-1.54112	0.87766
Bradi3g05437	2	43.1297	39.1858	34.7816	20.205	18.1372	37.2326		0.908558	0.806442	0.468471	0.420526	0.863269		1.05837	0.679519	0.256447	-1.14379	-1.34243	0.491886
Bradi3g05685	2	4.73533	3.12866	5.52917	2.63748	1.99873	6.92905		0.660706	1.16764	0.556978	0.422089	1.46327		0.30399	-0.544544	0.72324	-0.803954	-1.14129	1.46256
Bradi3g06402	2	15.7741	15.0091	14.2825	11.0646	7.43115	21.3548		0.951504	0.905438	0.701442	0.471098	1.35379		0.34574	0.182618	0.027673	-0.658488	-1.43327	1.53573
Bradi3g06530	2	177.694	164.213	145.144	72.2639	68.0018	212.989		0.924131	0.816819	0.406676	0.38269	1.19863		0.643069	0.412762	0.0870053	-1.15802	-1.23083	1.24602
Bradi3g07130	2	137.562	139.599	107.464	49.5083	46.5155	119.117		1.01481	0.781206	0.3599	0.338143	0.865921		0.895753	0.944295	0.17874	-1.20192	-1.27322	0.456361
Bradi3g07150	2	126.078	128.676	74.3006	31.9755	13.5169	135.095		1.02061	0.589323	0.253617	0.107211	1.07152		0.77356	0.822413	-0.20007	-0.995961	-1.34306	0.943117
Bradi3g07860	2	14.1227	12.7811	11.0672	2.2997	1.95004	10.2773		0.905005	0.783649	0.162837	0.138078	0.727718		1.013	0.760067	0.43694	-1.21605	-1.28198	0.288017
Bradi3g07897	2	16.0151	11.497	11.7679	6.14477	8.64765	14.1305		0.717887	0.734801	0.383687	0.539969	0.882328		1.29826	0.0362722	0.111934	-1.45872	-0.759617	0.771871
Bradi3g08180	2	7.27032	7.57795	5.52835	1.83397	2.46282	9.05665		1.04231	0.7604	0.252254	0.33875	1.2457		0.5643	0.669596	-0.0319432	-1.29646	-1.08122	1.17573
Bradi3g08200	2	9.74992	8.50182	7.11689	5.32171	4.49864	9.77429		0.871989	0.729943	0.545821	0.461402	1.0025		1.00616	0.449527	-0.168132	-0.968756	-1.33583	1.01703
Bradi3g08690	2	60.9604	61.2334	42.2036	21.2463	29.0529	70.1844		1.00448	0.692312	0.348527	0.476586	1.15131		0.684007	0.69786	-0.26774	-1.33114	-0.93503	1.15205
Bradi3g09660	2	289.381	301.481	241.703	136.362	42.5951	233.181		1.04181	0.83524	0.47122	0.147194	0.805792		0.822434	0.943892	0.343831	-0.713596	-1.65485	0.258286
Bradi3g09730	2	185.206	149.6	149.175	65.2049	23.8837	143.417		0.807748	0.805456	0.352067	0.128957	0.774366		1.0739	0.49271	0.485781	-0.884854	-1.55933	0.391793
Bradi3g10330	2	11.9254	14.3086	9.13135	5.38021	7.1467	12.8162		1.19985	0.765707	0.451156	0.599284	1.0747		0.520175	1.20612	-0.284001	-1.36365	-0.855223	0.776578
Bradi3g10530	2	404.204	389.418	284.64	126.768	78.6308	384.884		0.963419	0.704199	0.313624	0.194532	0.952202		0.88112	0.777811	0.0457587	-1.05725	-1.39357	0.746135
Bradi3g11337	2	101.49	114.029	107.16	52.5852	50.7275	91.6094		1.12354	1.05587	0.51813	0.499825	0.902641		0.547545	0.998514	0.75148	-1.21144	-1.27826	0.192154
Bradi3g11370	2	65.656	55.8007	43.0744	16.7375	11.9058	86.3843		0.849895	0.656063	0.254926	0.181335	1.31571		0.662604	0.320045	-0.122305	-1.03775	-1.20569	1.3831
Bradi3g12460	2	427.529	496.138	407.042	267.448	159.592	654.248		1.16048	0.95208	0.625567	0.373289	1.5303		0.147379	0.543446	0.0291101	-0.776746	-1.39938	1.45619
Bradi3g12690	2	72.8586	73.6053	61.3054	40.2976	23.5636	83.6672		1.01025	0.841431	0.553094	0.323416	1.14835		0.595466	0.628062	0.0911876	-0.825774	-1.55619	1.06725
Bradi3g12800	2	377.476	281.745	167.106	76.5625	42.2504	224.001		0.746391	0.442693	0.202828	0.111929	0.593419		1.44553	0.687766	-0.219664	-0.936364	-1.20796	0.230695
Bradi3g12925	2	30.3198	27.8913	19.6949	15.3066	5.52574	27.1775		0.919905	0.649573	0.504838	0.182249	0.896364		0.988182	0.731076	-0.136687	-0.601285	-1.6368	0.65551
Bradi3g12930	2	15.8824	12.1499	11.5168	9.86821	5.52092	13.6213		0.764995	0.725133	0.621331	0.347613	0.857636		1.26021	0.204581	0.0255222	-0.44075	-1.67028	0.620715
Bradi3g12980	2	20.2294	18.8631	11.3101	6.51038	4.96186	33.7748		0.932458	0.55909	0.321827	0.245279	1.66958		0.399532	0.27222	-0.431556	-0.878782	-1.02307	1.66166
Bradi3g13170	2	1453.01	1024.19	677.388	374.529	346.649	1728.36		0.704875	0.466198	0.257762	0.238574	1.18951		0.908307	0.157807	-0.449147	-0.9792	-1.028	1.39023
Bradi3g14330	2	11.6714	10.3444	8.73734	6.36679	5.09823	16.5185		0.886298	0.748611	0.545503	0.436813	1.41529		0.459269	0.13542	-0.256747	-0.835245	-1.14482	1.64212
Bradi3g14830	2	104.281	86.48	61.9215	50.4797	67.1487	110.252		0.829299	0.593796	0.484075	0.643921	1.05726		1.00256	0.264708	-0.75325	-1.22752	-0.536583	1.25008
Bradi3g14950	2	97.5855	99.1145	80.3926	42.9295	60.158	136.335		1.01567	0.823817	0.439917	0.616465	1.39708		0.350114	0.396665	-0.173334	-1.31392	-0.78939	1.52987
Bradi3g15027	2	5.19866	6.89669	7.11895	3.13499	2.17567	6.26823		1.32663	1.36938	0.603038	0.418506	1.20574		0.0323644	0.859235	0.96747	-0.972559	-1.43971	0.553201
Bradi3g15300	2	12.1979	10.4026	7.32778	7.35019	1.01301	9.29364		0.852816	0.60074	0.602577	0.0830479	0.761903		1.10373	0.639342	-0.155992	-0.150197	-1.78938	0.3525
Bradi3g16880	2	65.2449	59.5674	43.4545	29.4204	23.5936	69.7232		0.912981	0.666021	0.450922	0.361615	1.06864		0.867422	0.573301	-0.261411	-0.988437	-1.29029	1.09942
Bradi3g19100	2	49.1289	54.7219	42.7895	18.6832	11.8118	75.7941		1.11384	0.870964	0.38029	0.240425	1.54276		0.294171	0.530088	0.0267686	-0.99006	-1.2799	1.41894
Bradi3g19180	2	61.0598	50.4738	35.8072	24.7051	20.0412	65.6279		0.826629	0.586428	0.404605	0.328223	1.07481		0.952339	0.395579	-0.375803	-0.959706	-1.205	1.19259
Bradi3g19630	2	124.998	127.059	76.6727	41.0063	25.1514	216.483		1.01649	0.61339	0.328055	0.201214	1.73189		0.329837	0.359263	-0.360097	-0.869298	-1.09565	1.63595
Bradi3g19730	2	118.851	138.52	148.81	72.4275	39.6263	116.607		1.16549	1.25206	0.609395	0.333411	0.981115		0.312714	0.784225	1.03089	-0.800202	-1.58654	0.258907
Bradi3g19850	2	163.333	169.576	128.171	73.8314	40.2989	159.07		1.03822	0.784727	0.452031	0.246729	0.973903		0.763676	0.880094	0.107997	-0.905325	-1.53063	0.684191
Bradi3g19980	2	15.4758	14.3854	10.7834	6.30152	7.88387	21.6438		0.929544	0.696792	0.407187	0.509434	1.39856		0.485158	0.291395	-0.348698	-1.14515	-0.863956	1.58125
Bradi3g20660	2	74.0477	59.2666	29.8129	25.7699	15.1418	113.74		0.800384	0.402618	0.348017	0.204487	1.53603		0.568241	0.169883	-0.623909	-0.73287	-1.0193	1.63796
Bradi3g20720	2	29.0634	19.1221	10.9041	6.73733	5.55468	39.7659		0.657944	0.375183	0.231815	0.191123	1.36824		0.773641	0.0438622	-0.559408	-0.865286	-0.952103	1.55929
Bradi3g20725	2	8.97452	7.18982	5.06193	2.04231	1.44864	14.148		0.801137	0.564033	0.227568	0.161416	1.57647		0.526307	0.150133	-0.29838	-0.934846	-1.05998	1.61677
Bradi3g20730	2	11.9426	11.5424	9.96264	6.99478	5.91043	10.5689		0.966489	0.834212	0.585702	0.494904	0.884978		0.99175	0.830118	0.192116	-1.00651	-1.44445	0.436971
Bradi3g20810	2	37.5866	35.0573	33.8292	16.1945	19.5132	40.8764		0.932708	0.900033	0.430858	0.519153	1.08753		0.697258	0.448064	0.327063	-1.41037	-1.0834	1.02138
Bradi3g21280	2	132.356	102.615	67.5328	30.4522	21.8441	170.689		0.775299	0.510236	0.230078	0.16504	1.28962		0.765073	0.256887	-0.342579	-0.976185	-1.12328	1.42008
Bradi3g22330	2	194.286	262.921	213.886	151.247	95.7884	340.756		1.35326	1.10088	0.778474	0.493027	1.75389		-0.181354	0.620241	0.04756	-0.68402	-1.33173	1.5293
Bradi3g22350	2	109.598	102.22	84.6116	44.3332	39.4117	131.738		0.932689	0.772022	0.404509	0.359604	1.20202		0.657498	0.457719	-0.0191488	-1.10994	-1.24322	1.25709
Bradi3g22930	2	535.683	574.101	469.861	185.259	34.765	522.453		1.07172	0.877125	0.345837	0.0648985	0.975302		0.668735	0.841553	0.372645	-0.907591	-1.58456	0.609222
Bradi3g22991	2	9.90382	5.57757	6.38142	5.40361	4.90129	9.93386		0.563174	0.644339	0.545609	0.494888	1.00303		1.25643	-0.626435	-0.276586	-0.702145	-0.920768	1.2695
Bradi3g23040	2	75.4881	64.4119	59.8322	49.9686	29.7239	80.4645		0.853273	0.792605	0.66194	0.393756	1.06592		0.842091	0.240595	-0.00810877	-0.543758	-1.64316	1.11234
Bradi3g24760	2	23.8296	20.2418	13.5157	12.0917	4.98013	30.4677		0.849439	0.567178	0.507424	0.208989	1.27856		0.690283	0.297703	-0.438279	-0.594086	-1.37224	1.41662
Bradi3g25370	2	90.6017	76.5799	55.0908	26.1116	19.6939	106.114		0.845236	0.608055	0.288202	0.217368	1.17121		0.808318	0.406918	-0.208243	-1.03782	-1.22154	1.25237
Bradi3g26820	2	55.1578	41.4409	25.0268	4.11742	8.10181	49.9354		0.751315	0.453731	0.0746479	0.146884	0.905318		1.13549	0.500481	-0.259396	-1.22738	-1.04292	0.893724
Bradi3g27000	2	5.16031	7.75392	5.26111	2.09043	5.09283	5.77516		1.50261	1.01953	0.405098	0.986923	1.11915		-0.0157515	1.41031	0.0396704	-1.70368	-0.0528563	0.322312
Bradi3g27220	2	18.1356	15.7875	21.2359	14.2957	7.34523	18.2175		0.87053	1.17095	0.788269	0.405018	1.00452		0.480308	-0.0101703	1.12793	-0.321804	-1.77369	0.497425
Bradi3g27260	2	16.4562	16.8136	10.3029	8.18196	9.50521	21.1296		1.02172	0.626076	0.497195	0.577605	1.28398		0.530149	0.599686	-0.667139	-1.07981	-0.822338	1.43945
Bradi3g27400	2	5.08268	3.94222	3.18499	2.34829	1.31447	6.39569		0.775619	0.626636	0.462018	0.258618	1.25833		0.743258	0.125114	-0.285318	-0.73882	-1.29917	1.45493
Bradi3g28450	2	21.3036	22.7453	22.1656	10.9508	8.7632	27.532		1.06767	1.04046	0.514036	0.411348	1.29236		0.324708	0.520285	0.441642	-1.07976	-1.37653	1.16966
Bradi3g30127	2	52.443	45.5293	37.846	16.9309	8.45531	50.4322		0.868168	0.72166	0.322843	0.161229	0.961657		0.933372	0.557545	0.139881	-0.997066	-1.4578	0.824064
Bradi3g30150	2	141.809	104.139	92.8778	60.8449	57.4141	154.204		0.73436	0.65495	0.429062	0.404869	1.0874		0.993278	0.0561601	-0.223982	-1.02086	-1.10621	1.30162
Bradi3g30210	2	35.6421	30.1565	24.5067	17.1888	17.1143	40.5918		0.846091	0.687577	0.482261	0.480171	1.13887		0.838246	0.271166	-0.312883	-1.06937	-1.07707	1.34992
Bradi3g30300	2	298.893	242.088	219.166	184.6	138.339	238.407		0.809949	0.733259	0.617612	0.462839	0.797635		1.43714	0.399089	-0.01979	-0.651451	-1.49682	0.331827
Bradi3g30740	2	54.5946	45.9984	39.0935	24.1349	18.8684	43.5848		0.842545	0.71607	0.442074	0.345609	0.798335		1.23819	0.607718	0.101294	-0.99582	-1.38208	0.430697
Bradi3g30757	2	35.0024	32.5204	27.3292	17.6885	13.3017	53.6388		0.92909	0.78078	0.505351	0.380022	1.53243		0.354965	0.181839	-0.180262	-0.852723	-1.15872	1.6549
Bradi3g31527	2	6.65671	6.30804	5.11108	3.29704	2.56544	7.15264		0.947622	0.76781	0.495296	0.385391	1.0745		0.783213	0.59806	-0.0375652	-1.00088	-1.38939	1.04657
Bradi3g31810	2	11.1476	7.19892	4.58446	4.72849	6.14532	8.98535		0.645784	0.411252	0.424173	0.55127	0.806037		1.56783	0.0262501	-0.994457	-0.938225	-0.385083	0.723685
Bradi3g32100	2	237.634	191.798	124.065	42.0209	15.688	223.983		0.807112	0.522085	0.17683	0.0660174	0.942551		1.04258	0.557104	-0.160277	-1.02924	-1.30815	0.897986
Bradi3g32130	2	18.3983	15.3103	10.7067	7.88264	12.4384	17.2361		0.832162	0.581939	0.428444	0.676063	0.93683		1.17271	0.408122	-0.731768	-1.43101	-0.302987	0.884937
Bradi3g32880	2	90.898	51.4738	40.6365	37.4778	19.3872	82.5168		0.566281	0.447056	0.412306	0.213285	0.907795		1.34283	-0.0815768	-0.473134	-0.587259	-1.24088	1.04002
Bradi3g33020	2	7.916	7.00274	6.93557	3.89011	3.52212	6.33896		0.884632	0.876146	0.491424	0.444937	0.800778		1.09987	0.593016	0.555736	-1.1345	-1.33874	0.224614
Bradi3g33440	2	92.9525	72.3967	46.5985	39.3151	33.3533	92.1425		0.778857	0.501315	0.422959	0.358821	0.991286		1.13292	0.360754	-0.608341	-0.881935	-1.10589	1.10249
Bradi3g33770	2	133.004	112.629	102.828	65.0311	54.1737	122.851		0.846807	0.773115	0.48894	0.407307	0.923659		1.0843	0.445496	0.138207	-1.04678	-1.38718	0.765962
Bradi3g34040	2	39.8829	34.9441	23.784	9.51751	12.1056	44.1332		0.876168	0.596347	0.238637	0.303529	1.10657		0.857898	0.518625	-0.24803	-1.22808	-1.05029	1.14988
Bradi3g34280	2	57.8306	60.0478	28.5101	27.6595	22.3842	47.5412		1.03834	0.492992	0.478284	0.387065	0.822075		1.03767	1.17168	-0.734487	-0.785896	-1.10474	0.415768
Bradi3g34320	2	156.162	129.611	158.897	71.7108	90.039	228.514		0.829976	1.01752	0.459208	0.576575	1.46332		0.303332	-0.17025	0.352126	-1.20298	-0.87607	1.59385
Bradi3g34375	2	31.7024	14.0528	5.39044	5.90153	5.90264	25.6768		0.443273	0.170032	0.186154	0.186189	0.809932		1.48334	-0.0629284	-0.821832	-0.777056	-0.776959	0.955438
Bradi3g34517	2	99.4584	102.559	65.5469	20.6457	2.91638	95.838		1.03118	0.659038	0.207581	0.0293226	0.963599		0.807703	0.879335	0.0243202	-1.01293	-1.42249	0.724068
Bradi3g34720	2	77.4341	71.4592	36.6194	7.49753	4.35824	59.5739		0.922839	0.47291	0.0968246	0.0562833	0.769349		1.08749	0.899752	-0.194946	-1.10998	-1.20862	0.526305
Bradi3g34721	2	3.30608	9.08364	5.00902	0.49895	0.224761	11.5559		2.74756	1.51509	0.150919	0.067984	3.49534		-0.356976	0.900383	0.0136311	-0.967886	-1.02756	1.43841
Bradi3g34940	2	44.9686	49.4828	40.6097	30.8704	22.2745	63.9065		1.10038	0.903066	0.686487	0.495334	1.42114		0.202638	0.512728	-0.0967952	-0.765818	-1.3563	1.50355
Bradi3g34980	2	123.22	212.973	151.175	77.4355	17.9458	224.156		1.72839	1.22687	0.628433	0.14564	1.81915		-0.142045	0.989765	0.210476	-0.7194	-1.46958	1.13079
Bradi3g35540	2	97.7546	105.79	129.215	43.641	36.7456	100.99		1.0822	1.32183	0.446435	0.375897	1.0331		0.326167	0.543399	1.17664	-1.13671	-1.32312	0.413626
Bradi3g36010	2	9.78192	11.5979	8.67363	5.08187	3.7042	8.60775		1.18565	0.8867	0.519517	0.378679	0.879966		0.632735	1.24586	0.258542	-0.954148	-1.41929	0.236299
Bradi3g36920	2	26.713	37.1233	27.6646	11.0923	10.0167	45.339		1.38971	1.03562	0.415238	0.374974	1.69726		0.0277568	0.77208	0.095793	-1.08911	-1.16601	1.35949
Bradi3g36930	2	531.596	507.33	347.041	152.643	65.2604	377.978		0.954353	0.652828	0.28714	0.122763	0.711024		1.0722	0.942938	0.0891315	-0.946365	-1.41182	0.25392
Bradi3g37210	2	4.74487	6.03862	2.78747	1.55279	1.46306	4.95131		1.27266	0.587469	0.327257	0.308346	1.04351		0.600539	1.27311	-0.417046	-1.05891	-1.10556	0.707857
Bradi3g37680	2	17.4651	14.9675	11.2709	8.57081	10.6827	21.1724		0.856994	0.645338	0.490739	0.611662	1.21227		0.726569	0.199583	-0.580378	-1.15008	-0.704479	1.50879
Bradi3g38210	2	26.1455	27.3819	28.2549	12.9005	9.40819	32.3168		1.04729	1.08068	0.493413	0.35984	1.23604		0.367877	0.501228	0.595384	-1.06065	-1.43732	1.03348
Bradi3g38580	2	93.242	79.7709	58.4818	31.2076	27.1885	116.869		0.855525	0.627204	0.334695	0.291591	1.25339		0.718449	0.338142	-0.262876	-1.03286	-1.14632	1.38547
Bradi3g38702	2	15.1328	12.0118	8.83923	6.94518	8.91303	14.1291		0.793753	0.584109	0.458947	0.588986	0.933668		1.26657	0.311179	-0.659953	-1.23974	-0.637361	0.959301
Bradi3g38777	2	103.524	97.5647	74.1958	34.5686	7.44213	82.4787		0.942438	0.716703	0.33392	0.0718881	0.796713		0.975135	0.817635	0.199994	-0.847359	-1.56432	0.418911
Bradi3g38897	2	224.907	220.242	229.036	117.591	111.008	351.901		0.97926	1.01836	0.522843	0.493571	1.56465		0.178455	0.125746	0.225107	-1.03418	-1.10857	1.61345
Bradi3g39750	2	1116.56	1059.38	718.283	471.202	404.742	1743.32		0.948786	0.643298	0.422011	0.362489	1.56133		0.396326	0.28166	-0.40231	-0.897758	-1.03102	1.65311
Bradi3g39830	2	56.6791	43.4877	31.6463	29.3865	24.9841	60.8457		0.767262	0.558341	0.518471	0.440799	1.07351		1.03403	0.154439	-0.635138	-0.785822	-1.07937	1.31186
Bradi3g39900	2	39.5498	33.9948	23.3699	17.8816	16.1052	53.2437		0.859545	0.590897	0.452128	0.407212	1.34624		0.617701	0.230376	-0.510461	-0.893138	-1.017	1.57252
Bradi3g39920	2	7.1044	4.69731	5.60747	1.70421	0.254397	7.98981		0.661183	0.789295	0.239882	0.0358084	1.12463		0.838564	0.0453771	0.345294	-0.940908	-1.41865	1.13033
Bradi3g39960	2	9.17368	8.47836	7.71807	3.90942	3.551	7.63847		0.924205	0.841328	0.426156	0.387085	0.832652		1.01043	0.721173	0.404882	-1.17957	-1.32868	0.371768
Bradi3g40400	2	89.6798	53.0705	43.1048	32.8456	30.8699	58.635		0.591778	0.480652	0.366254	0.344224	0.653826		1.76532	0.0784666	-0.380729	-0.853442	-0.944477	0.334861
Bradi3g40410	2	17.6165	23.2567	19.1854	9.9133	7.48835	22.6395		1.32017	1.08906	0.562729	0.425077	1.28513		0.141916	0.999657	0.380508	-1.02955	-1.39833	0.905796
Bradi3g41800	2	25.0091	26.4553	18.961	7.13881	3.47715	26.022		1.05783	0.758164	0.285449	0.139036	1.0405		0.706264	0.848813	0.110112	-1.05518	-1.41611	0.806104
Bradi3g42270	2	9.74453	10.7552	10.7163	4.85835	3.72837	9.61526		1.10372	1.09972	0.498572	0.382611	0.986735		0.484733	0.809568	0.797059	-1.08569	-1.44886	0.443188
Bradi3g42700	2	400.201	350.159	308.931	146.83	88.1164	439.761		0.874958	0.77194	0.366891	0.220181	1.09885		0.787103	0.432896	0.141077	-1.0063	-1.42189	1.06712
Bradi3g42730	2	130.177	119.273	90.6322	61.2126	60.736	112.616		0.916231	0.69622	0.470224	0.466563	0.865092		1.15087	0.786073	-0.172019	-1.15618	-1.17212	0.563376
Bradi3g42745	2	8.6264	8.72905	5.83393	3.79299	4.24683	8.29945		1.0119	0.676288	0.439696	0.492307	0.9621		0.902038	0.947468	-0.333761	-1.23697	-1.03612	0.757351
Bradi3g43070	2	346.429	359.857	289.893	220.59	162.032	328.098		1.03876	0.836803	0.636753	0.46772	0.947086		0.792789	0.964643	0.0692361	-0.817714	-1.56714	0.558186
Bradi3g43360	2	131.69	107.49	84.9902	63.9781	78.704	114.166		0.816236	0.64538	0.485823	0.597645	0.866933		1.3826	0.422621	-0.46993	-1.30345	-0.719296	0.687458
Bradi3g43790	2	14.3913	13.3852	11.0928	7.77073	6.47773	15.1297		0.930088	0.770795	0.539959	0.450113	1.0513		0.841303	0.560718	-0.07859	-1.00503	-1.36561	1.04721
Bradi3g44140	2	49.0392	37.9843	18.89	15.9035	6.93111	49.6411		0.77457	0.385202	0.324301	0.141338	1.01227		1.05777	0.452129	-0.593951	-0.757569	-1.24912	1.09074
Bradi3g44850	2	18.8704	21.6843	16.4869	11.9163	9.43727	24.8977		1.14912	0.87369	0.63148	0.50011	1.3194		0.28312	0.764517	-0.124644	-0.906572	-1.33067	1.31425
Bradi3g44920	2	63.9615	60.5049	45.4847	29.4433	27.7094	61.5781		0.945958	0.711127	0.460328	0.43322	0.962738		0.961689	0.751931	-0.159531	-1.13297	-1.23818	0.817061
Bradi3g45010	2	301.585	288.887	245.965	174.166	123.732	303.378		0.957895	0.815572	0.577501	0.410272	1.00594		0.826785	0.657359	0.0846677	-0.873303	-1.54621	0.850706
Bradi3g45140	2	307.586	274.809	245.479	187.637	148.686	261.056		0.893437	0.798081	0.61003	0.483395	0.848726		1.19089	0.633613	0.13494	-0.848489	-1.51074	0.399788
Bradi3g45570	2	10.901	8.58366	6.76246	2.39606	2.05246	8.71905		0.787417	0.62035	0.219801	0.188282	0.799837		1.19871	0.557456	0.0534996	-1.15475	-1.24983	0.594921
Bradi3g45643	2	2.51337	7.16805	5.69605	1.76814	0.536039	7.94844		2.85197	2.2663	0.703496	0.213275	3.16247		-0.571975	0.942181	0.463344	-0.814395	-1.2152	1.19604
Bradi3g45840	2	171.875	126.417	68.3004	42.906	26.7453	120.997		0.735514	0.397383	0.249635	0.155609	0.703981		1.41296	0.599926	-0.439493	-0.893676	-1.18271	0.502993
Bradi3g46450	2	41.4782	33.0577	53.0973	19.2008	10.3973	45.4389		0.796989	1.28012	0.462914	0.250669	1.09549		0.472432	-0.0442195	1.18533	-0.89442	-1.43457	0.715445
Bradi3g46737	2	322.817	303.87	259.656	146.344	81.7148	268.082		0.941307	0.804343	0.453334	0.25313	0.830447		0.96985	0.770982	0.306918	-0.882387	-1.56072	0.395361
Bradi3g47041	2	1372.19	1118.83	883.849	953.064	673.569	1145.47		0.815362	0.644117	0.694558	0.490872	0.83478		1.43763	0.39005	-0.581545	-0.295354	-1.45101	0.500225
Bradi3g47550	2	82.434	67.4749	30.6166	35.938	13.7485	111.339		0.818532	0.371407	0.435961	0.166781	1.35064		0.695826	0.287773	-0.717642	-0.572484	-1.17777	1.48429
Bradi3g47646	2	24.8451	21.5348	12.728	18.8076	8.98922	22.4154		0.86676	0.512292	0.756992	0.36181	0.902204		1.07988	0.540297	-0.895185	0.0957695	-1.50459	0.683833
Bradi3g47690	2	643.175	625.961	466.233	227.584	130.015	711.312		0.973235	0.724892	0.353845	0.202146	1.10594		0.733918	0.662049	-0.00478961	-1.00111	-1.40845	1.01838
Bradi3g47740	2	89.6894	78.8267	54.5816	38.6224	35.4352	68.0441		0.878885	0.608562	0.430623	0.395088	0.758663		1.31946	0.822183	-0.287716	-1.0183	-1.1642	0.328574
Bradi3g47800	2	7.96576	7.56935	6.76813	4.5839	3.07748	7.17677		0.950236	0.849653	0.575451	0.386339	0.900952		0.919798	0.71444	0.299375	-0.832145	-1.61253	0.511066
Bradi3g47890	2	189.005	166.225	123.752	67.6862	76.7255	227.35		0.879476	0.654756	0.358119	0.405945	1.20288		0.742872	0.384456	-0.283822	-1.16597	-1.02374	1.3462
Bradi3g47910	2	128.857	138.331	99.7847	59.6687	50.8068	105.452		1.07353	0.774385	0.463062	0.394289	0.818363		0.891146	1.15743	0.0740513	-1.05344	-1.30251	0.233325
Bradi3g48480	2	121.688	115.645	86.2034	41.598	36.383	147.277		0.950337	0.708396	0.341841	0.298985	1.21028		0.670401	0.536345	-0.116731	-1.10618	-1.22186	1.23802
Bradi3g48490	2	71.325	37.9889	39.0198	31.5778	42.4163	69.5873		0.532616	0.547071	0.442731	0.59469	0.975637		1.31371	-0.617885	-0.558147	-0.989363	-0.361347	1.21303
Bradi3g48590	2	418.595	273.333	310.457	70.4431	78.7813	364.303		0.652977	0.741665	0.168285	0.188204	0.870299		1.13329	0.141237	0.394773	-1.24437	-1.18743	0.762506
Bradi3g48610	2	9.13387	7.96961	6.71348	5.12986	3.01527	8.05064		0.872534	0.735009	0.561631	0.330119	0.881405		1.09377	0.577182	0.0198294	-0.682831	-1.62109	0.613137
Bradi3g49790	2	269.388	187.949	141.593	91.5056	94.698	195.381		0.697688	0.525611	0.33968	0.351531	0.725278		1.5549	0.359928	-0.320256	-1.0552	-1.00836	0.468983
Bradi3g50010	2	76.4586	52.38	47.6207	35.9162	42.3888	90.4969		0.685076	0.62283	0.469746	0.554402	1.18361		0.888466	-0.242538	-0.466087	-1.01587	-0.711836	1.54786
Bradi3g50060	2	75.6139	63.582	49.9916	27.7902	9.21781	61.2285		0.840876	0.661143	0.367527	0.121906	0.809751		1.11345	0.629975	0.0838856	-0.808217	-1.5545	0.535407
Bradi3g50390	2	196.12	167.07	149.111	84.2521	51.19	188.519		0.851877	0.760305	0.429596	0.261015	0.961245		0.964322	0.47063	0.165423	-0.936824	-1.4987	0.835152
Bradi3g51207	2	5.07568	6.3442	4.23144	1.10952	1.42044	5.6215		1.24992	0.833669	0.218596	0.279853	1.10754		0.502459	1.07743	0.119798	-1.29523	-1.15431	0.749857
Bradi3g51250	2	43.0183	58.1561	31.4556	11.0773	17.1747	48.277		1.35189	0.731215	0.257503	0.399242	1.12224		0.445177	1.2712	-0.185757	-1.29773	-0.965017	0.732129
Bradi3g51510	2	26.5144	24.2223	24.2803	13.1221	21.309	32.7386		0.913555	0.915742	0.494905	0.803677	1.23475		0.436867	0.081362	0.0903564	-1.64034	-0.370513	1.40227
Bradi3g51560	2	30.3625	34.3123	25.9423	8.73266	15.5892	27.9055		1.13009	0.85442	0.287614	0.513437	0.919078		0.67649	1.08412	0.220324	-1.55573	-0.84813	0.422925
Bradi3g51640	2	68.9423	54.6732	34.3821	42.8675	45.4993	65.4376		0.793029	0.498709	0.621789	0.659961	0.949164		1.25774	0.200511	-1.30291	-0.6742	-0.479211	0.998065
Bradi3g52400	2	1237.06	1599.68	1028.44	628.798	271.882	1566.06		1.29313	0.831358	0.508301	0.219781	1.26595		0.345107	1.03369	-0.0510434	-0.809926	-1.48768	0.969846
Bradi3g52500	2	41.349	35.3105	30.0633	18.7469	21.9396	33.4945		0.853963	0.727063	0.453383	0.530596	0.810043		1.31849	0.607522	-0.0102822	-1.34267	-0.966765	0.393703
Bradi3g53080	2	14.3219	8.65155	5.51403	3.76258	3.07059	18.4131		0.604077	0.385006	0.262715	0.214398	1.28566		0.866483	-0.0490982	-0.555705	-0.838507	-0.950241	1.52707
Bradi3g53702	2	28.9816	27.1002	24.1235	11.3699	12.9395	24.8571		0.935083	0.832376	0.392314	0.446474	0.857688		0.989073	0.738273	0.341473	-1.35866	-1.14942	0.439264
Bradi3g53970	2	152.609	151.973	114.109	67.4533	64.8051	208.12		0.995832	0.747718	0.442	0.424647	1.36374		0.469657	0.45821	-0.223204	-1.06282	-1.11048	1.46864
Bradi3g54690	2	106.021	118.857	95.3149	69.3167	49.6953	124.752		1.12107	0.899022	0.653804	0.468732	1.17668		0.41101	0.849647	0.0451784	-0.843216	-1.51371	1.05109
Bradi3g55110	2	298.771	227.504	178.606	128.667	85.3833	236.339		0.761468	0.597804	0.430654	0.285782	0.791037		1.36722	0.449958	-0.179404	-0.82217	-1.37927	0.563664
Bradi3g55200	2	82.9077	68.1227	42.6997	26.43	18.6406	83.9111		0.821669	0.515027	0.318789	0.224836	1.0121		1.02104	0.502674	-0.388666	-0.959086	-1.23219	1.05622
Bradi3g55450	2	34.7481	39.1654	26.399	4.02956	2.96902	32.1257		1.12712	0.759726	0.115965	0.0854442	0.924533		0.726434	1.00526	0.199434	-1.21255	-1.27949	0.560909
Bradi3g56020	2	697.99	570.751	447.85	391.353	259.525	784.692		0.817707	0.641629	0.560686	0.371817	1.12422		0.876963	0.230589	-0.393751	-0.68076	-1.35045	1.31741
Bradi3g56060	2	107.902	105.29	93.0351	47.9648	22.4136	109.236		0.975791	0.86222	0.444523	0.207722	1.01236		0.7313	0.660361	0.327561	-0.896426	-1.59033	0.767532
Bradi3g56280	2	68.0592	80.5832	64.2519	29.5035	12.2224	69.772		1.18402	0.944059	0.433498	0.179585	1.02517		0.521258	0.987766	0.37944	-0.914909	-1.55861	0.58506
Bradi3g56450	2	62.6927	66.9336	57.7717	34.0677	26.0651	100.153		1.06765	0.921507	0.543408	0.415759	1.59752		0.1801	0.341051	-0.00666146	-0.906284	-1.21	1.6018
Bradi3g57220	2	100.742	104.525	95.899	49.3465	36.4909	131.956		1.03755	0.951927	0.489831	0.362221	1.30984		0.393267	0.497687	0.259599	-1.02526	-1.38008	1.25478
Bradi3g57370	2	10.8057	13.3021	15.5673	3.78011	4.50584	15.3656		1.23103	1.44066	0.349827	0.416989	1.422		0.0477538	0.522321	0.952921	-1.28776	-1.14981	0.914576
Bradi3g57380	2	434.688	429.8	359.009	202.155	141.486	621.625		0.988755	0.8259	0.465057	0.325489	1.43005		0.401631	0.373543	-0.0332423	-0.934569	-1.28319	1.47583
Bradi3g58020	2	112.689	125.713	84.9683	33.0099	15.2086	129.465		1.11558	0.754009	0.29293	0.134962	1.14887		0.596578	0.862865	0.0298365	-1.03245	-1.3964	0.939569
Bradi3g58270	2	13.1207	15.6737	8.62979	7.22251	5.6455	13.6856		1.19458	0.657724	0.550467	0.430274	1.04306		0.609011	1.24164	-0.503812	-0.85253	-1.24331	0.748998
Bradi3g58290	2	94.9736	88.6718	66.4094	21.3356	15.6761	87.841		0.933647	0.699241	0.224647	0.165058	0.9249		0.916443	0.738684	0.110711	-1.16072	-1.32036	0.71525
Bradi3g58780	2	64.3694	53.696	47.7734	18.8119	12.8389	63.3458		0.834185	0.742177	0.292249	0.199457	0.984098		0.934308	0.457095	0.192296	-1.10259	-1.36965	0.888542
Bradi3g59057	2	93.3173	66.1435	43.2454	21.2941	15.9786	83.0459		0.708802	0.463423	0.228191	0.171229	0.889931		1.22803	0.382782	-0.32947	-1.01227	-1.17761	0.908534
Bradi3g59130	2	596.969	582.171	423.947	309.858	213.449	604.069		0.975212	0.710167	0.519052	0.357554	1.01189		0.851233	0.762459	-0.186753	-0.871196	-1.44957	0.893831
Bradi3g59430	2	326.445	405.95	284.656	179.612	86.2285	344.556		1.24355	0.871987	0.550206	0.264144	1.05548		0.468657	1.14362	0.113885	-0.77789	-1.57068	0.622406
Bradi3g59490	2	246.424	234.214	161.507	70.5602	28.7372	220.761		0.950451	0.655401	0.286336	0.116617	0.895856		0.940084	0.806701	0.0124488	-0.981048	-1.43792	0.659735
Bradi3g60027	2	20.8996	22.0746	21.8235	10.9009	8.35908	32.3023		1.05622	1.04421	0.521583	0.399963	1.54559		0.173729	0.309239	0.280286	-0.979473	-1.27263	1.48885
Bradi3g60290	2	101.249	99.7161	91.9397	47.3879	26.8312	138.021		0.984861	0.908057	0.468033	0.265002	1.36318		0.422918	0.384916	0.192119	-0.912445	-1.4221	1.33459
Bradi3g60920	2	46.3392	52.1461	35.7502	17.2498	2.69914	42.7153		1.12531	0.771489	0.37225	0.0582474	0.921796		0.710249	1.01524	0.15408	-0.817618	-1.58186	0.519909
Bradi4g00250	2	15.1044	14.3934	12.6098	11.1929	6.80214	13.6141		0.952929	0.834843	0.741036	0.450342	0.901336		0.934031	0.698398	0.107268	-0.362319	-1.81751	0.440129
Bradi4g01430	2	241.763	258.833	213.884	120.375	104.662	247.24		1.07061	0.884687	0.497907	0.432914	1.02265		0.647876	0.899406	0.237099	-1.14072	-1.37224	0.728578
Bradi4g01490	2	30.5594	29.3305	22.9261	15.8403	12.6846	34.6434		0.959788	0.750214	0.518343	0.415081	1.13364		0.71463	0.57364	-0.161156	-0.97413	-1.33618	1.1832
Bradi4g01640	2	243.254	226.427	163.054	116.121	119.073	278.345		0.930826	0.670305	0.477367	0.489502	1.14426		0.766842	0.519685	-0.411144	-1.1005	-1.05714	1.28226
Bradi4g03477	2	241.312	202.494	164.279	124.15	106.048	192.647		0.839135	0.680773	0.514478	0.439466	0.79833		1.37027	0.604814	-0.148736	-0.940031	-1.29697	0.41065
Bradi4g03820	2	77.3999	54.2756	26.0851	11.9118	10.3017	88.1616		0.701236	0.337018	0.153899	0.133097	1.13904		0.972677	0.285058	-0.553209	-0.974666	-1.02254	1.29268
Bradi4g05860	2	129.295	114.44	97.9335	73.6768	57.8267	148.239		0.885108	0.757443	0.569835	0.447246	1.14652		0.755809	0.319393	-0.165547	-0.878176	-1.34383	1.31235
Bradi4g06867	2	10.7371	8.21939	4.9618	3.08813	2.23385	10.2557		0.765514	0.462118	0.287613	0.208049	0.955164		1.13338	0.446521	-0.442189	-0.953349	-1.18641	1.00205
Bradi4g06980	2	171.26	139.604	99.2638	43.3402	24.7254	166.272		0.815156	0.579608	0.253066	0.144373	0.970873		1.02016	0.514364	-0.13017	-1.0237	-1.32112	0.940458
Bradi4g07440	2	200.979	140.018	77.9513	49.586	36.1955	136.637		0.696677	0.387857	0.246722	0.180096	0.679856		1.48932	0.524328	-0.458159	-0.90717	-1.11914	0.470811
Bradi4g07620	2	48.7992	45.2036	33.7903	18.1239	11.6771	59.4192		0.92632	0.692436	0.371398	0.239288	1.21763		0.682397	0.488136	-0.128512	-0.974946	-1.32326	1.25619
Bradi4g08030	2	920.769	997.426	694.942	351.293	109.879	809.397		1.08325	0.754741	0.381522	0.119334	0.879045		0.787933	1.00879	0.137306	-0.852776	-1.54831	0.467061
Bradi4g08060	2	50.1974	47.5378	35.213	21.6605	22.0403	44.8008		0.947018	0.701491	0.431506	0.439072	0.892493		1.04518	0.83601	-0.133333	-1.19924	-1.16937	0.620742
Bradi4g08210	2	3.39514	4.97502	7.58134	2.46163	1.33052	7.73992		1.46534	2.233	0.725045	0.391889	2.27971		-0.44427	0.147819	1.12458	-0.79412	-1.21802	1.18401
Bradi4g08420	2	78.1372	83.3059	73.0948	30.0595	17.722	67.0542		1.06615	0.935467	0.384702	0.226806	0.85816		0.726135	0.914658	0.542216	-1.02745	-1.47745	0.321893
Bradi4g08800	2	7237.28	6707.1	4407.03	1880.97	661.729	6788.69		0.926743	0.608934	0.2599	0.0914333	0.938016		0.937859	0.748328	-0.0739177	-0.97695	-1.41281	0.777492
Bradi4g09125	2	8270.02	8237.63	4729.75	2620.39	1312.67	6492.6		0.996084	0.571916	0.316854	0.158726	0.785077		1.02927	1.01814	-0.188266	-0.913701	-1.36344	0.417999
Bradi4g10655	2	47.4498	29.4392	33.1312	16.1006	23.4365	39.3035		0.620428	0.698237	0.339318	0.493921	0.828317		1.42941	-0.182343	0.148051	-1.376	-0.719517	0.700401
Bradi4g11300	2	30.4811	30.6462	26.6883	10.1939	6.95653	51.2753		1.00542	0.875568	0.334432	0.228224	1.6822		0.276107	0.286374	0.0402925	-0.98523	-1.18651	1.56897
Bradi4g11500	2	41.343	40.4371	31.0234	23.1887	17.5648	34.7649		0.978088	0.75039	0.560887	0.424855	0.840891		1.04848	0.953082	-0.0382937	-0.86337	-1.45564	0.355739
Bradi4g11635	2	24.9093	11.8565	9.47494	7.87838	10.4197	25.3523		0.475988	0.380378	0.316283	0.418306	1.01778		1.24587	-0.392223	-0.691105	-0.89147	-0.57254	1.30147
Bradi4g13260	2	85.294	74.8703	47.41	32.9501	19.7881	71.1765		0.877791	0.555842	0.386313	0.231999	0.834484		1.15947	0.757217	-0.302476	-0.86048	-1.3684	0.614673
Bradi4g14237	2	51.162	38.4709	25.1232	28.6856	15.0235	57.2108		0.751943	0.491053	0.560681	0.293646	1.11823		0.944497	0.156727	-0.671797	-0.450675	-1.29871	1.31996
Bradi4g14630	2	77.2711	69.1388	46.9706	29.2634	19.6406	69.0406		0.894757	0.607867	0.378711	0.254178	0.893485		1.07035	0.727438	-0.207333	-0.953993	-1.35976	0.723294
Bradi4g15010	2	74.2477	78.8266	47.7368	5.41721	1.76783	63.3328		1.06167	0.642939	0.0729613	0.0238099	0.852993		0.853804	0.98849	0.0739863	-1.17084	-1.27818	0.532742
Bradi4g16480	2	84.8002	75.4396	63.6515	29.3463	22.105	102.968		0.889616	0.750606	0.346064	0.260672	1.21424		0.685501	0.390458	0.0189035	-1.06238	-1.29062	1.25814
Bradi4g16830	2	120.013	145.347	123.428	67.1523	34.1398	153.153		1.21109	1.02845	0.55954	0.284467	1.27613		0.273864	0.815551	0.346868	-0.856432	-1.56232	0.982468
Bradi4g17260	2	63.2937	39.7802	25.0504	8.63033	14.7568	64.5289		0.628502	0.39578	0.136354	0.233148	1.01951		1.13432	0.156865	-0.455456	-1.13804	-0.883361	1.18567
Bradi4g17460	2	11.0266	12.2936	9.18958	3.53811	1.99123	10.2178		1.11491	0.833403	0.320871	0.180585	0.926651		0.703544	1.00231	0.270397	-1.06217	-1.42691	0.512838
Bradi4g20500	2	148.113	104.15	61.0085	50.2508	19.7759	102.656		0.703178	0.411905	0.339273	0.133519	0.693093		1.45759	0.502886	-0.433968	-0.667581	-1.32937	0.470447
Bradi4g21270	2	231.268	202.027	144.515	95.9408	66.9939	183.549		0.873562	0.624882	0.414847	0.289681	0.793666		1.21545	0.755187	-0.150066	-0.914643	-1.37028	0.464348
Bradi4g21750	2	53.1136	44.2613	26.221	14.8417	16.7684	47.9205		0.833332	0.493677	0.279432	0.315708	0.902225		1.15561	0.624443	-0.458026	-1.14082	-1.02521	0.844002
Bradi4g22110	2	92.8331	80.8602	65.5237	28.4558	13.8297	72.4849		0.871027	0.705823	0.306526	0.148973	0.780809		1.08973	0.704117	0.210178	-0.983669	-1.45473	0.434375
Bradi4g22180	2	224.105	208.943	166.089	82.1844	57.4725	243.379		0.932344	0.741123	0.366723	0.256454	1.086		0.780153	0.584344	0.0309156	-1.05267	-1.37181	1.02907
Bradi4g22220	2	229.234	178.843	110.734	66.1282	38.9224	156.167		0.780175	0.483061	0.288475	0.169793	0.681254		1.38505	0.681686	-0.268981	-0.891594	-1.27134	0.365171
Bradi4g22510	2	23.9757	24.727	23.3612	13.6965	11.9518	21.5553		1.03133	0.97437	0.571267	0.498498	0.899048		0.732952	0.867329	0.62304	-1.10564	-1.4177	0.300025
Bradi4g22700	2	54.5585	40.701	21.3016	13.7659	14.6885	43.2841		0.746006	0.390435	0.252314	0.269224	0.793352		1.35796	0.545976	-0.590742	-1.0323	-0.978239	0.697336
Bradi4g23680	2	40.415	33.2689	20.5921	20.0724	10.0645	33.4095		0.823182	0.509516	0.496657	0.249029	0.82666		1.25385	0.61889	-0.507507	-0.553685	-1.44293	0.63138
Bradi4g23800	2	594.296	371.982	389.766	86.1018	64.973	447.979		0.62592	0.655845	0.14488	0.109328	0.753799		1.28348	0.220565	0.305593	-1.14627	-1.24729	0.583921
Bradi4g25490	2	14.5654	15.5302	12.2215	6.83124	3.31753	26.624		1.06624	0.839076	0.469004	0.227768	1.82789		0.171196	0.290555	-0.118786	-0.785646	-1.22035	1.66303
Bradi4g25510	2	96.5543	95.1934	85.0334	42.4137	27.8262	116.078		0.985905	0.88068	0.439273	0.288193	1.20221		0.563002	0.523448	0.228158	-1.01055	-1.43452	1.13046
Bradi4g25740	2	23.3575	20.1666	18.1793	6.83312	8.44226	27.0207		0.863391	0.778309	0.292545	0.361437	1.15683		0.743578	0.349728	0.104432	-1.29605	-1.09743	1.19574
Bradi4g26342	2	23.8919	22.3445	14.4458	5.7289	4.55058	40.3487		0.935233	0.604634	0.239784	0.190466	1.68881		0.399068	0.28343	-0.306833	-0.958248	-1.0463	1.62889
Bradi4g27040	2	170.216	154.699	112.826	85.5794	70.196	136.373		0.908839	0.662838	0.502768	0.412393	0.801173		1.2381	0.842537	-0.2249	-0.919469	-1.31162	0.375357
Bradi4g27050	2	143.344	127.018	120.056	61.1396	29.4821	192.044		0.886112	0.837537	0.426525	0.205675	1.33975		0.533255	0.253902	0.134754	-0.873403	-1.41512	1.36661
Bradi4g27210	2	43.9687	47.1031	42.2092	20.646	7.32758	48.9788		1.07129	0.959984	0.469562	0.166654	1.11395		0.525082	0.70939	0.421623	-0.846319	-1.62946	0.819686
Bradi4g27460	2	14.086	14.1619	10.4762	6.5933	7.45112	14.4246		1.00539	0.743729	0.468075	0.528973	1.02403		0.811439	0.832774	-0.203109	-1.29439	-1.0533	0.90659
Bradi4g27500	2	13.0779	11.4321	7.5578	4.5193	2.76223	8.94247		0.874152	0.577907	0.345568	0.211214	0.683785		1.27184	0.855632	-0.124123	-0.892525	-1.33687	0.226041
Bradi4g28350	2	261.858	268.396	131.768	82.662	96.0336	313.137		1.02497	0.503205	0.315674	0.366739	1.19583		0.694226	0.75948	-0.604307	-1.09448	-0.961005	1.20608
Bradi4g28640	2	58.5628	42.0563	36.6461	20.5849	32.9332	69.289		0.71814	0.625758	0.351501	0.562357	1.18316		0.856688	-0.0725721	-0.377144	-1.28134	-0.58617	1.46053
Bradi4g29480	2	28.7804	26.6821	23.4053	9.66257	5.53747	46.4548		0.927092	0.813235	0.335734	0.192404	1.61411		0.364866	0.222028	-0.00103199	-0.936526	-1.21733	1.56799
Bradi4g30000	2	280.38	219.081	172.31	95.8722	55.1044	189.997		0.781374	0.61456	0.341937	0.196535	0.677641		1.35953	0.612708	0.0428771	-0.888392	-1.38508	0.258361
Bradi4g30170	2	40.2979	37.3893	31.333	21.2499	9.15907	34.8576		0.927821	0.777533	0.52732	0.227284	0.864997		0.956644	0.709307	0.194318	-0.663084	-1.69122	0.49403
Bradi4g30480	2	6.86	5.63537	2.91564	1.4151	1.34149	6.19719		0.821483	0.425021	0.206284	0.195553	0.903381		1.13179	0.636643	-0.463019	-1.06973	-1.09949	0.863801
Bradi4g31257	2	96.2766	84.92	65.4138	25.2298	6.38321	72.3763		0.882042	0.679436	0.262055	0.0663007	0.751754		1.07568	0.752871	0.198418	-0.943793	-1.4795	0.396324
Bradi4g31750	2	8.24844	8.51487	5.78826	3.31144	2.08054	7.55637		1.0323	0.701741	0.401462	0.252234	0.916097		0.864264	0.963016	-0.0475866	-0.965609	-1.42184	0.607753
Bradi4g32941	2	29.4991	35.6038	25.8911	6.41262	1.36064	33.9373		1.20695	0.877692	0.217384	0.0461248	1.15045		0.505117	0.922856	0.258228	-1.07466	-1.42036	0.80882
Bradi4g33067	2	7.38055	8.26609	7.51087	2.87264	2.15942	14.6837		1.11998	1.01766	0.389218	0.292582	1.98951		0.052189	0.248843	0.0811298	-0.948892	-1.10728	1.67401
Bradi4g33377	2	17.1095	15.9383	12.8387	8.37902	8.51475	23.5037		0.931547	0.750388	0.48973	0.497663	1.37372		0.473722	0.270403	-0.267678	-1.04189	-1.01832	1.58376
Bradi4g33899	2	4.24501	3.68993	2.51363	1.68827	1.44647	5.81081		0.869239	0.592138	0.397708	0.340745	1.36886		0.605754	0.273714	-0.429926	-0.923642	-1.06829	1.54239
Bradi4g35020	2	33.124	30.2097	26.5375	11.8001	14.1321	30.832		0.91202	0.801157	0.356239	0.426642	0.930807		0.947607	0.629627	0.228947	-1.37908	-1.12463	0.697528
Bradi4g35850	2	40.3254	31.6405	26.7855	13.7369	9.95765	36.4005		0.784631	0.664234	0.340651	0.246932	0.902669		1.12927	0.421193	0.0253619	-1.03849	-1.3466	0.809269
Bradi4g35860	2	5.56658	3.73027	2.48071	1.83358	2.8976	5.62632		0.670119	0.445642	0.329391	0.520534	1.01073		1.17296	0.0256759	-0.755027	-1.15933	-0.494562	1.21029
Bradi4g36517	2	8.54565	8.30667	7.31507	3.20121	2.15672	6.70211		0.972035	0.855999	0.374601	0.252376	0.784272		0.926651	0.838344	0.471932	-1.0482	-1.43416	0.245435
Bradi4g36601	2	1083.29	924.819	389.092	255.736	45.226	703.266		0.853716	0.359177	0.236074	0.0417488	0.649196		1.27985	0.887092	-0.440708	-0.77123	-1.29298	0.337972
Bradi4g37540	2	45.4188	31.9553	28.6605	24.4892	21.3628	55.8745		0.703569	0.631027	0.539186	0.470352	1.23021		0.809178	-0.200314	-0.447355	-0.760119	-0.994533	1.59314
Bradi4g37555	2	80.1846	79.0957	59.0955	42.3173	32.2229	89.6638		0.98642	0.736994	0.527748	0.401859	1.11822		0.713015	0.665733	-0.202674	-0.931188	-1.36949	1.1246
Bradi4g37870	2	205.146	154.503	84.4037	49.7214	19.9949	180.821		0.753135	0.411432	0.24237	0.0974665	0.881423		1.18934	0.51546	-0.417305	-0.878801	-1.27435	0.865655
Bradi4g38260	2	414.719	344.448	289.154	193.248	214.972	498.746		0.830557	0.697228	0.465973	0.518356	1.20261		0.754272	0.15764	-0.311829	-1.12611	-0.941666	1.46769
Bradi4g38440	2	209.397	252.15	198.177	119.765	63.2803	254.925		1.20417	0.946417	0.57195	0.302202	1.21742		0.346011	0.905327	0.199222	-0.826613	-1.56557	0.941627
Bradi4g39197	2	100.331	91.1881	57.9604	40.9552	37.8683	140.182		0.908876	0.577695	0.408202	0.377435	1.3972		0.558919	0.329258	-0.505427	-0.932603	-1.01015	1.56
Bradi4g39570	2	121.97	121.106	100.993	51.9508	35.0504	103.358		0.992916	0.828015	0.425931	0.287369	0.847407		0.895322	0.871808	0.32444	-1.01022	-1.47016	0.388812
Bradi4g39695	2	16.5792	12.8725	7.53599	10.1623	10.0878	17.0056		0.776424	0.454545	0.612953	0.608459	1.02572		1.10127	0.130572	-1.26692	-0.57917	-0.59868	1.21293
Bradi4g40270	2	14.2593	10.3772	9.01113	4.38759	4.57859	16.0889		0.727751	0.631948	0.307701	0.321095	1.12831		0.925408	0.122705	-0.159764	-1.11578	-1.07629	1.30372
Bradi4g40710	2	174.763	152.672	122.128	65.5711	33.9659	185.709		0.873598	0.698822	0.375201	0.194354	1.06264		0.854731	0.493673	-0.00555913	-0.929957	-1.44653	1.03364
Bradi4g40740	2	149.293	116.886	111.524	79.3786	38.1998	194.274		0.78293	0.747014	0.531698	0.255872	1.3013		0.635048	0.0362152	-0.0628655	-0.65686	-1.41778	1.46625
Bradi4g40800	2	842.648	689.126	477.936	261.25	132.041	598.385		0.81781	0.567184	0.310034	0.156698	0.710125		1.28373	0.708175	-0.0835831	-0.895951	-1.38036	0.367983
Bradi4g40960	2	35.1603	40.9603	31.6402	18.2089	11.4624	49.8821		1.16496	0.899885	0.517881	0.326003	1.41871		0.276148	0.682523	0.0295128	-0.911562	-1.38426	1.30764
Bradi4g41540	2	5.08674	4.83359	3.03341	2.60503	2.21298	5.75444		0.950234	0.596337	0.512122	0.435049	1.13126		0.78627	0.615521	-0.5987	-0.887644	-1.15208	1.23664
Bradi4g42517	2	25.4955	21.6781	13.4126	11.4355	7.68205	35.9		0.85027	0.526076	0.448531	0.301309	1.40809		0.593257	0.229634	-0.557677	-0.745996	-1.10353	1.58431
Bradi4g43280	2	69.3449	76.8941	52.096	16.0625	9.11069	63.7199		1.10887	0.751259	0.231633	0.131382	0.918884		0.751112	1.01517	0.147771	-1.11263	-1.35579	0.55436
Bradi4g43450	2	175.997	242.204	174.453	118.534	46.7433	288.795		1.37619	0.99123	0.673502	0.265592	1.64091		0.0179024	0.786475	-1.56853e-05	-0.649154	-1.48254	1.32733
Bradi4g44140	2	4.34498	3.71813	2.66338	2.0738	2.82787	5.16022		0.85573	0.612979	0.477287	0.650836	1.18763		0.760637	0.218966	-0.692459	-1.20192	-0.55032	1.4651
Bradi4g44300	2	60.6556	74.7871	65.862	46.7778	28.0931	63.1736		1.23298	1.08583	0.771203	0.463157	1.04151		0.246162	1.09514	0.558944	-0.587579	-1.7101	0.397432
Bradi5g00540	2	18.3152	21.299	19.6018	13.0905	8.54527	21.4285		1.16291	1.07025	0.714731	0.466567	1.16998		0.245633	0.823415	0.494774	-0.766088	-1.64622	0.848484
Bradi5g01180	2	660.068	694.936	567.777	285.126	104.566	659.827		1.05282	0.860179	0.431965	0.158417	0.999634		0.676656	0.819919	0.29745	-0.863901	-1.60579	0.675663
Bradi5g01950	2	92.6783	115.586	76.5791	32.8812	27.2774	109.425		1.24717	0.826289	0.354789	0.294323	1.1807		0.446563	1.05042	0.022176	-1.12972	-1.27745	0.888011
Bradi5g02260	2	371.682	343.993	286.287	156.957	80.1815	378.454		0.925503	0.770246	0.422289	0.215726	1.01822		0.824534	0.600901	0.134833	-0.909707	-1.52979	0.879232
Bradi5g02510	2	140.705	124.62	81.2318	32.9035	24.3562	142.793		0.885679	0.577318	0.233846	0.1731	1.01484		0.930949	0.62906	-0.185235	-1.09225	-1.25266	0.97013
Bradi5g02890	2	159.56	201.518	183.852	80.335	13.6575	246.139		1.26296	1.15224	0.503478	0.0855949	1.54261		0.140958	0.631773	0.425116	-0.785802	-1.56578	1.15374
Bradi5g02990	2	123.858	111.54	95.1207	53.4851	30.6033	100.875		0.900546	0.767982	0.431826	0.247084	0.814442		1.0511	0.709872	0.255044	-0.898307	-1.53216	0.41445
Bradi5g03211	2	60.4233	59.4818	45.5658	44.7764	25.3942	91.461		0.984419	0.75411	0.741045	0.420272	1.51367		0.26695	0.224397	-0.404582	-0.440263	-1.3163	1.6698
Bradi5g06127	2	106.064	68.1108	56.7144	57.9579	48.9384	91.3735		0.642168	0.53472	0.546444	0.461406	0.861496		1.54082	-0.152386	-0.660816	-0.605339	-1.00773	0.885443
Bradi5g06390	2	4.63085	5.58576	5.0771	3.90778	2.30251	5.72423		1.20621	1.09637	0.843859	0.497211	1.23611		0.0724753	0.818195	0.42097	-0.492185	-1.74578	0.926328
Bradi5g07390	2	39.7285	33.6737	14.3146	4.79144	2.18949	42.6064		0.847596	0.36031	0.120605	0.0551113	1.07244		0.936334	0.599766	-0.476349	-1.00571	-1.15035	1.09631
Bradi5g07880	2	162.338	138.685	119.115	77.0522	74.4183	170.876		0.854298	0.733747	0.47464	0.458415	1.05259		0.932197	0.360836	-0.111899	-1.12797	-1.1916	1.13844
Bradi5g09180	2	54.29	49.91	33.1269	26.5689	33.4393	48.7299		0.919322	0.610184	0.489388	0.615938	0.897586		1.17083	0.784642	-0.69513	-1.27335	-0.667584	0.680595
Bradi5g09320	2	4.44481	4.2148	4.38148	2.94164	1.95762	7.12019		0.948252	0.985753	0.661814	0.440428	1.60191		0.153592	0.0217991	0.117307	-0.707712	-1.27155	1.68656
Bradi5g09630	2	185.183	164.479	118.679	92.1955	84.7855	166.888		0.888198	0.640875	0.497862	0.457847	0.901203		1.17262	0.685258	-0.392856	-1.01627	-1.1907	0.741949
Bradi5g10130	2	258.716	243.293	115.68	69.5732	100.897	191.779		0.940386	0.447133	0.268917	0.389993	0.741272		1.20643	1.01137	-0.602536	-1.18565	-0.789498	0.359881
Bradi5g10500	2	6.34077	6.38016	4.71942	3.53897	2.09096	7.03519		1.00621	0.744298	0.558129	0.329764	1.10952		0.687549	0.708019	-0.154926	-0.768309	-1.52072	1.04838
Bradi5g10590	2	8.36191	6.27623	4.99095	3.53815	3.23719	7.04546		0.750574	0.596867	0.423126	0.387135	0.842565		1.38055	0.347375	-0.289309	-1.00897	-1.15806	0.72842
Bradi5g11060	2	11.9306	12.6975	12.9876	6.10887	3.62876	21.515		1.06428	1.08859	0.512032	0.304155	1.80334		0.0724414	0.195196	0.241629	-0.859428	-1.25641	1.60657
Bradi5g11100	2	117.519	110.906	70.3201	49.4824	30.8091	102.57		0.943726	0.598372	0.421058	0.262163	0.872792		1.04806	0.861998	-0.279873	-0.866139	-1.39151	0.627462
Bradi5g11147	2	152.994	98.874	42.6847	33.7488	8.2323	100.885		0.646262	0.278997	0.22059	0.0538081	0.659409		1.48722	0.482258	-0.561132	-0.727065	-1.20089	0.519608
Bradi5g11360	2	128.76	123.48	100.356	59.5435	40.8108	114.745		0.958993	0.779399	0.462437	0.316952	0.891153		0.942497	0.796748	0.158436	-0.968115	-1.4852	0.555633
Bradi5g12330	2	1144.83	1293.9	764.439	457.011	129.912	1236.59		1.13022	0.667734	0.399197	0.113478	1.08016		0.650845	0.966838	-0.15546	-0.807114	-1.50047	0.845356
Bradi5g12430	2	143.198	144.117	121.865	73.8541	59.8981	172.705		1.00642	0.851024	0.515749	0.418289	1.20606		0.54489	0.565826	0.0590312	-1.0344	-1.35225	1.21691
Bradi5g12730	2	10.3608	8.53095	6.16505	5.61322	3.79423	8.55981		0.823391	0.595039	0.541777	0.366212	0.826176		1.32934	0.566843	-0.419051	-0.649006	-1.407	0.578869
Bradi5g13580	2	14.6984	11.655	8.64965	8.52448	7.29062	12.8155		0.792947	0.588476	0.579961	0.496016	0.871899		1.41413	0.362598	-0.675825	-0.719071	-1.14539	0.763559
Bradi5g13727	2	13.0696	12.4671	10.0622	4.6312	5.20425	11.0005		0.953898	0.769889	0.354348	0.398194	0.841687		1.00676	0.841196	0.180356	-1.31199	-1.15453	0.438207
Bradi5g14490	2	65.7717	49.8443	36.4314	20.7758	24.5583	43.4142		0.757837	0.553907	0.315877	0.373387	0.660073		1.53586	0.581757	-0.221712	-1.15953	-0.932948	0.196574
Bradi5g15130	2	42.2684	35.7767	23.017	14.5036	6.99099	41.4271		0.846417	0.544544	0.34313	0.165395	0.980094		1.0117	0.572035	-0.292151	-0.868748	-1.37756	0.954718
Bradi5g15300	2	37.6284	35.8155	27.8643	14.9875	11.4472	43.7471		0.951821	0.740513	0.398303	0.304218	1.16261		0.696699	0.557086	-0.0552457	-1.0469	-1.31954	1.16791
Bradi5g16200	2	56.3377	38.0966	21.3111	18.7488	13.9899	43.9739		0.676218	0.378273	0.332792	0.248322	0.780541		1.45665	0.361456	-0.646345	-0.800185	-1.08591	0.714328
Bradi5g16690	2	11.0064	11.0145	8.50051	3.66693	3.43702	9.77408		1.00073	0.772323	0.333163	0.312274	0.888034		0.888956	0.891268	0.171866	-1.2113	-1.2771	0.536311
Bradi5g16980	2	332.744	343.184	240.889	61.3949	25.9033	382.886		1.03137	0.723946	0.184511	0.0778477	1.15069		0.664216	0.732481	0.0635722	-1.11014	-1.34222	0.992099
Bradi5g17027	2	275.485	203.923	134.323	152.451	131.997	239.704		0.740233	0.487589	0.553391	0.479143	0.870117		1.43681	0.238959	-0.926046	-0.622616	-0.964993	0.837885
Bradi5g17210	2	37.3297	39.9692	34.4831	17.2247	40.6828	36.7007		1.07071	0.923745	0.461421	1.08982	0.983149		0.336531	0.639554	0.00973031	-1.97161	0.721476	0.264315
Bradi5g17740	2	42.2881	32.8737	20.6178	10.4508	6.75224	61.2078		0.777374	0.487555	0.247134	0.159672	1.4474		0.641039	0.185786	-0.406874	-0.898519	-1.07737	1.55594
Bradi5g18670	2	18.9238	16.5846	11.843	11.8467	8.22543	24.2586		0.876387	0.625826	0.626021	0.434661	1.28191		0.626763	0.224358	-0.591308	-0.590673	-1.21362	1.54448
Bradi5g18853	2	6.49668	4.45774	4.10106	2.38003	3.35432	7.81206		0.686158	0.631254	0.366346	0.516314	1.20247		0.854308	-0.152734	-0.328905	-1.17893	-0.697721	1.50398
Bradi5g18870	2	43.2541	33.8878	27.3797	19.6966	13.9892	44.3028		0.783459	0.632998	0.45537	0.323418	1.02425		1.0386	0.28073	-0.245871	-0.867552	-1.32937	1.12346
Bradi5g18880	2	172.683	165.109	107.242	74.6326	48.7425	168.334		0.956139	0.621034	0.432193	0.282265	0.974811		0.929748	0.788606	-0.289744	-0.897421	-1.37988	0.848693
Bradi5g19130	2	31.3267	29.4864	10.6619	11.7687	5.15272	29.1308		0.941253	0.340346	0.375675	0.164483	0.929901		1.00955	0.851277	-0.767635	-0.672455	-1.24143	0.820694
Bradi5g19600	2	5.33466	7.03965	5.31987	1.23842	3.56789	5.57138		1.31961	0.997228	0.232146	0.668814	1.04438		0.325719	1.17227	0.318378	-1.70812	-0.551505	0.443257
Bradi5g19650	2	6.59193	10.6924	8.04595	1.86565	1.94365	8.36572		1.62205	1.22058	0.28302	0.294853	1.26909		0.0943556	1.22883	0.496636	-1.21325	-1.19167	0.585107
Bradi5g19660	2	27.8734	43.2693	37.7425	15.8687	12.1961	35.9241		1.55235	1.35407	0.569314	0.437554	1.28883		-0.0749943	1.15464	0.713231	-1.03377	-1.32709	0.567994
Bradi5g20177	2	54.9961	45.5859	28.1848	9.32698	9.41805	37.52		0.828894	0.512488	0.169593	0.171249	0.68223		1.28238	0.78285	-0.140876	-1.14193	-1.1371	0.354674
Bradi5g20960	2	20.5974	39.115	22.0353	12.9726	10.0374	36.9417		1.89903	1.06981	0.629818	0.487317	1.79352		-0.250375	1.28525	-0.131132	-0.882678	-1.12608	1.10502
Bradi5g21260	2	90.2662	84.5257	68.9398	36.9055	25.6297	97.4066		0.936405	0.763739	0.408851	0.283935	1.0791		0.775474	0.581819	0.0560297	-1.02465	-1.40503	1.01635
Bradi5g22260	2	21.9439	15.3243	13.942	8.60713	11.7928	24.478		0.698341	0.635345	0.392233	0.537408	1.11548		0.976738	-0.113724	-0.341446	-1.22027	-0.695477	1.39418
Bradi5g22290	2	964.936	887.503	657.567	223.215	51.3755	711.795		0.919753	0.681462	0.231326	0.0532424	0.73766		1.04192	0.830828	0.204005	-0.980068	-1.44852	0.351835
Bradi5g22510	2	25.4492	24.9461	18.6483	12.9797	5.98501	21.6191		0.980233	0.732767	0.510026	0.235175	0.849501		0.94845	0.881978	0.0498238	-0.699187	-1.62343	0.442365
Bradi5g23340	2	32.7659	25.6009	25.2526	16.3372	17.2213	38.2678		0.781327	0.770699	0.498604	0.525585	1.16791		0.800102	-0.0357843	-0.0764105	-1.1165	-1.01336	1.44196
Bradi5g23437	2	77.6471	71.4353	50.1907	23.9903	19.7875	81.1517		0.92	0.646396	0.308965	0.254839	1.04513		0.869694	0.64091	-0.141541	-1.10652	-1.26131	0.998769
Bradi5g23450	2	35.7988	36.5634	29.4379	17.1237	10.2468	38.6532		1.02136	0.822315	0.478332	0.286234	1.07974		0.669697	0.735108	0.125522	-0.927952	-1.51627	0.913893
Bradi5g23460	2	58.1492	35.6187	35.1762	16.8024	10.8916	36.4157		0.612539	0.60493	0.288954	0.187304	0.626246		1.55066	0.205554	0.179138	-0.917804	-1.27069	0.253141
Bradi5g24550	2	1009.54	988.566	763.321	421.766	223.511	1347.9		0.979228	0.75611	0.417782	0.2214	1.33516		0.524688	0.474008	-0.0703559	-0.895814	-1.37495	1.34242
Bradi5g24590	2	55.0994	54.8217	41.179	30.5828	14.962	47.7387		0.99496	0.747359	0.555048	0.271545	0.866412		0.919363	0.901597	0.0286909	-0.649292	-1.64876	0.448405
Bradi5g24630	2	81.937	65.2071	32.3157	23.0643	6.40765	73.1074		0.79582	0.394396	0.281488	0.0782021	0.892239		1.14296	0.595544	-0.480701	-0.783415	-1.32844	0.854048
Bradi5g26240	2	18.2132	15.447	15.1699	7.84648	6.59632	14.7096		0.848117	0.832903	0.430812	0.362172	0.807633		1.12046	0.526249	0.466727	-1.10638	-1.37492	0.36786
Bradi5g26550	2	47.986	61.7398	29.7658	20.8595	25.4273	48.6936		1.28662	0.620302	0.4347	0.52989	1.01475		0.554472	1.41063	-0.579715	-1.13413	-0.849786	0.59852
Bradi5g26587	2	48.2618	68.9335	35.2986	13.6668	18.3992	41.7503		1.42832	0.731398	0.283181	0.381238	0.865079		0.519519	1.53809	-0.119233	-1.18512	-0.951933	0.198669
Bradi5g26660	2	7.1566	6.56663	6.6605	2.42753	3.39528	7.95428		0.917563	0.93068	0.339201	0.474427	1.11146		0.655675	0.39129	0.433358	-1.46357	-1.02989	1.01314
Bradi1g00560	3	59.6467	65.476	46.7477	21.8164	12.0267	21.3508		1.09773	0.783743	0.36576	0.201632	0.357954		0.972402	1.23239	0.397103	-0.714835	-1.15146	-0.735602
Bradi1g00666	3	44.1325	56.62	14.8704	23.4721	4.69307	1.72415		1.28295	0.336949	0.531854	0.10634	0.0390676		0.90336	1.47078	-0.426297	-0.0354409	-0.88875	-1.02366
Bradi1g00940	3	320.737	312.215	224.317	64.2808	17.407	183.869		0.973429	0.69938	0.200416	0.0542719	0.57327		1.06429	0.996396	0.296181	-0.978708	-1.35212	-0.0260392
Bradi1g01630	3	13.453	9.66992	8.90113	4.80805	2.01185	7.80723		0.718795	0.661649	0.357397	0.149547	0.580336		1.42735	0.476322	0.283053	-0.745918	-1.44886	0.00805562
Bradi1g01880	3	158.651	171.439	124.226	64.9941	24.3232	97.4304		1.08061	0.783017	0.409668	0.153313	0.614119		0.921355	1.1488	0.309133	-0.744279	-1.46759	-0.167416
Bradi1g02400	3	69.2391	60.6764	39.6225	31.3254	26.5286	45.8368		0.876332	0.572256	0.452424	0.383144	0.662008		1.42182	0.908145	-0.354879	-0.85262	-1.14039	0.0179184
Bradi1g02510	3	377.492	424.85	328.469	163.487	172.578	222.482		1.12545	0.870135	0.433086	0.45717	0.589369		0.866802	1.2947	0.423851	-1.06685	-0.984704	-0.533797
Bradi1g03610	3	18.9643	20.53	14.195	7.60638	5.22479	9.14569		1.08256	0.74851	0.401089	0.275507	0.482259		1.01166	1.26098	0.252219	-0.796913	-1.17614	-0.5518
Bradi1g03840	3	84.9715	73.3361	43.6339	25.2621	8.78496	24.3135		0.863067	0.513512	0.297301	0.103387	0.286137		1.38382	0.996655	0.00832543	-0.602988	-1.15126	-0.634554
Bradi1g03940	3	15.9232	11.3621	7.83037	4.30996	2.88215	6.71673		0.713558	0.49176	0.270672	0.181004	0.421821		1.61376	0.664319	-0.0708531	-0.80367	-1.10088	-0.302671
Bradi1g04620	3	211.201	185.864	116.796	55.8634	16.4744	53.3056		0.880032	0.55301	0.264503	0.0780036	0.252393		1.33154	1.00905	0.129977	-0.645559	-1.14689	-0.678113
Bradi1g04690	3	26.3997	23.9965	18.9802	14.9545	9.93145	18.1757		0.908968	0.718953	0.566464	0.376195	0.68848		1.28167	0.87957	0.0402387	-0.633332	-1.47378	-0.0943659
Bradi1g04700	3	4793.53	3919.93	3263.91	2866.27	1917.09	2090.08		0.817753	0.6809	0.597946	0.399932	0.436022		1.50399	0.708525	0.11119	-0.250884	-1.11517	-0.95765
Bradi1g04720	3	27.9236	24.5178	15.1009	7.48186	2.98572	4.64199		0.878032	0.540793	0.26794	0.106925	0.166239		1.34076	1.01801	0.125618	-0.596396	-1.02247	-0.865515
Bradi1g05080	3	50.7686	40.6098	39.0469	23.2229	20.3342	26.4412		0.7999	0.769115	0.457426	0.400528	0.520817		1.45901	0.60545	0.474131	-0.855428	-1.09814	-0.585024
Bradi1g05450	3	37.9385	24.1613	5.49739	0.578966	0.0295677	0.13567		0.636854	0.144903	0.0152606	0.00077936	0.00357604		1.66236	0.799676	-0.368988	-0.676961	-0.711363	-0.704719
Bradi1g05740	3	192.6	167.568	156.25	108.779	87.0058	88.8434		0.870032	0.811266	0.564794	0.451744	0.461285		1.32546	0.763986	0.510109	-0.554665	-1.04305	-1.00183
Bradi1g05742	3	10.3022	6.8629	5.48901	2.3654	2.73265	2.50347		0.666158	0.532799	0.229602	0.265249	0.243003		1.66113	0.574898	0.140987	-0.845536	-0.729549	-0.801929
Bradi1g05743	3	46.2559	32.3391	30.6161	21.3411	20.5045	16.0155		0.699135	0.661885	0.461371	0.443284	0.346238		1.67652	0.409214	0.252309	-0.592296	-0.668483	-1.07726
Bradi1g05765	3	667.562	602.138	509.956	441.637	370.088	330.289		0.901995	0.763908	0.661566	0.554387	0.494769		1.37185	0.874931	0.174778	-0.344134	-0.887571	-1.18986
Bradi1g05769	3	3806.14	2943.63	3075.66	2125.85	1864.49	1748.9		0.773389	0.808078	0.558533	0.489865	0.459494		1.49438	0.430938	0.593729	-0.577342	-0.89959	-1.04212
Bradi1g05813	3	14.4925	14.6415	12.7526	4.47128	7.11421	4.06315		1.01028	0.879942	0.308523	0.490888	0.280362		0.990902	1.021	0.639281	-1.03427	-0.500165	-1.11675
Bradi1g06050	3	15.7884	22.2348	9.62917	1.86549	1.41384	2.52209		1.4083	0.609889	0.118155	0.0895491	0.159743		0.797563	1.54492	0.0834969	-0.816581	-0.868942	-0.740457
Bradi1g06160	3	35.093	36.0326	27.0817	18.4818	16.9534	21.1934		1.02678	0.771711	0.526653	0.483099	0.60392		1.11682	1.22981	0.153409	-0.880768	-1.06457	-0.554694
Bradi1g06290	3	160.645	137.479	118.497	59.9188	27.3898	47.3271		0.855791	0.737632	0.372989	0.170499	0.294607		1.26908	0.84156	0.491266	-0.589746	-1.19004	-0.822115
Bradi1g06340	3	413.48	429.164	443.356	206.647	94.4523	196.396		1.03793	1.07226	0.499775	0.228433	0.474984		0.777413	0.88232	0.977244	-0.606	-1.35642	-0.67456
Bradi1g06372	3	100.779	80.0762	59.2615	19.0207	20.4231	6.66258		0.794573	0.588034	0.188737	0.202652	0.0661108		1.39383	0.850148	0.303522	-0.753263	-0.716435	-1.07781
Bradi1g06678	3	16.488	12.7333	9.64345	5.72386	1.76368	2.69165		0.772275	0.584877	0.347153	0.106968	0.163249		1.42912	0.783711	0.252591	-0.421161	-1.10189	-0.942377
Bradi1g07060	3	10.6081	11.7938	11.2158	6.25607	3.00108	7.87728		1.11176	1.05728	0.589742	0.282903	0.74257		0.62937	0.976523	0.807294	-0.644936	-1.59801	-0.170237
Bradi1g07133	3	59.6752	50.8497	43.8155	13.5384	8.26769	24.7955		0.852107	0.734233	0.226868	0.138545	0.415508		1.24733	0.826923	0.491846	-0.950424	-1.2015	-0.414182
Bradi1g07190	3	4.69771	6.66105	3.98202	2.54792	1.44642	3.09283		1.41794	0.84765	0.542375	0.307898	0.658369		0.526577	1.60382	0.133891	-0.652964	-1.25733	-0.353987
Bradi1g07277	3	109.877	81.6523	54.4094	20.5359	31.1691	46.4328		0.743127	0.495186	0.1869	0.283674	0.422591		1.58124	0.731652	-0.0883962	-1.10804	-0.787961	-0.328503
Bradi1g07560	3	119.77	106.787	80.9535	38.8722	21.6712	67.4371		0.891602	0.675907	0.324557	0.18094	0.563055		1.24166	0.900047	0.220282	-0.887003	-1.33961	-0.135375
Bradi1g07880	3	11.7972	15.8094	12.6427	5.082	6.28218	9.87257		1.3401	1.07167	0.430781	0.532514	0.836857		0.383516	1.37657	0.592784	-1.27854	-0.981486	-0.0928423
Bradi1g08106	3	16.7772	17.78	7.00739	6.35231	7.01919	5.27814		1.05977	0.417673	0.378627	0.418377	0.314602		1.19213	1.36947	-0.535513	-0.651355	-0.533427	-0.841306
Bradi1g08130	3	13.5899	13.4217	8.935	4.05737	2.54806	2.85439		0.987622	0.657474	0.298558	0.187497	0.210038		1.17144	1.13872	0.265963	-0.682842	-0.976434	-0.916847
Bradi1g08310	3	220.44	196.948	150.902	50.2629	23.5559	51.8031		0.893432	0.68455	0.228012	0.106858	0.234999		1.2407	0.962556	0.417366	-0.774215	-1.09043	-0.755979
Bradi1g08480	3	137.615	127.442	105.583	40.1257	25.8902	90.0182		0.926077	0.767235	0.291579	0.188135	0.654131		1.08855	0.86635	0.38889	-1.04088	-1.35182	0.0489098
Bradi1g08907	3	171.794	152.13	84.6539	38.2711	6.52215	14.6082		0.885535	0.492765	0.222774	0.037965	0.0850331		1.32536	1.0475	0.0940703	-0.561321	-1.00994	-0.89568
Bradi1g09150	3	66.1276	62.9324	55.7313	31.9058	32.3069	34.8643		0.951681	0.842784	0.482489	0.488554	0.527228		1.1731	0.973896	0.524944	-0.960466	-0.935462	-0.776017
Bradi1g09410	3	539.708	454.138	394.226	166.857	48.6776	142.126		0.841451	0.730443	0.309161	0.0901924	0.263339		1.25825	0.825417	0.522369	-0.627721	-1.2255	-0.752816
Bradi1g09460	3	351.18	369.366	264.827	124.125	70.373	145.829		1.05178	0.754107	0.353452	0.20039	0.415254		1.03866	1.1837	0.349947	-0.772235	-1.20094	-0.599134
Bradi1g09537	3	182.455	207.284	173.132	129.126	60.5557	162.1		1.13608	0.948902	0.707712	0.331894	0.88844		0.579394	1.05871	0.399414	-0.450119	-1.77385	0.186449
Bradi1g09710	3	836.604	675.312	587.516	305.607	253.675	375.195		0.807206	0.702263	0.365294	0.30322	0.448474		1.43609	0.736202	0.355233	-0.868046	-1.09339	-0.566085
Bradi1g09780	3	13.2064	14.9735	8.39035	6.64039	5.9785	7.48784		1.13381	0.635323	0.502815	0.452697	0.566985		1.0083	1.48215	-0.283116	-0.752364	-0.929846	-0.525121
Bradi1g09910	3	74.0996	68.2747	56.9015	28.9755	6.59032	10.0995		0.921391	0.767906	0.391034	0.0889387	0.136296		1.12486	0.927953	0.543498	-0.400509	-1.15721	-1.03859
Bradi1g10930	3	6.00949	7.31005	5.06594	2.01069	1.37571	4.82476		1.21642	0.842989	0.334585	0.228922	0.802856		0.684477	1.24907	0.274867	-1.05146	-1.32712	0.170167
Bradi1g10990	3	240.542	235.27	197.633	131.111	46.6944	159.349		0.978082	0.821617	0.545066	0.194122	0.66246		0.984649	0.912658	0.398728	-0.509638	-1.66235	-0.124043
Bradi1g11000	3	115.638	122.876	85.5293	45.5674	25.9147	79.6317		1.06259	0.739632	0.394053	0.224103	0.688631		0.957358	1.14749	0.166453	-0.88329	-1.39954	0.0115307
Bradi1g11080	3	61.9026	48.4464	29.4015	29.4768	18.6923	27.1374		0.782622	0.474964	0.47618	0.301962	0.438388		1.62247	0.784691	-0.401033	-0.396347	-1.06779	-0.541998
Bradi1g11250	3	126.169	118.645	81.8381	21.032	21.1327	12.6899		0.940367	0.648637	0.166696	0.167495	0.100578		1.20512	1.06024	0.351486	-0.819384	-0.817444	-0.980017
Bradi1g11440	3	419.268	413.941	391.346	269.043	204.197	290.209		0.987296	0.933402	0.641696	0.487033	0.692181		0.984448	0.924818	0.671849	-0.697373	-1.42334	-0.460404
Bradi1g11490	3	62.0174	66.2514	53.6929	31.4404	29.0295	45.5787		1.06827	0.865771	0.506961	0.468085	0.734934		0.903966	1.17705	0.367059	-1.06815	-1.22365	-0.156274
Bradi1g11620	3	179.026	139.309	36.6504	19.5784	16.493	8.85528		0.778152	0.204721	0.109361	0.0921261	0.0494637		1.53264	0.990956	-0.409185	-0.642027	-0.684108	-0.788277
Bradi1g11750	3	10.4925	8.40987	6.60054	1.23837	0.568154	2.92781		0.801515	0.629074	0.118024	0.0541487	0.279039		1.34297	0.830062	0.384452	-0.936169	-1.10123	-0.520086
Bradi1g11800	3	101.869	119.829	63.6657	52.9049	52.4176	47.8838		1.1763	0.624974	0.51934	0.514557	0.47005		0.951585	1.54553	-0.311837	-0.667704	-0.683817	-0.833756
Bradi1g12130	3	8.28674	5.02071	3.69734	0.337534	0.10649	0.168268		0.605873	0.446175	0.0407319	0.0128506	0.0203057		1.59915	0.623014	0.227491	-0.77667	-0.845724	-0.82726
Bradi1g13090	3	32.4899	34.8941	24.6658	10.1642	4.03515	3.92066		1.074	0.759183	0.312842	0.124197	0.120673		1.0022	1.17275	0.447191	-0.581493	-1.01626	-1.02438
Bradi1g13650	3	74.8163	75.6684	61.6291	40.5529	27.7129	37.3374		1.01139	0.823739	0.542033	0.370412	0.499054		1.06583	1.10737	0.422962	-0.604487	-1.23043	-0.761241
Bradi1g14460	3	5.70205	6.87679	5.13023	3.44093	2.14717	3.22644		1.20602	0.899718	0.603455	0.376561	0.565838		0.722408	1.38466	0.400051	-0.552282	-1.28163	-0.673204
Bradi1g14850	3	11.1586	9.77638	6.58552	4.43959	2.31985	6.12494		0.876132	0.590176	0.397864	0.207898	0.5489		1.34662	0.925939	-0.0452334	-0.698371	-1.34354	-0.185418
Bradi1g15126	3	11.3409	9.4995	7.93619	5.46738	4.59143	5.66794		0.837632	0.699785	0.482094	0.404856	0.499779		1.48625	0.788747	0.196581	-0.738584	-1.07038	-0.662613
Bradi1g15350	3	94.3775	78.0997	64.5972	46.3508	33.3088	44.9217		0.827524	0.684456	0.491121	0.352931	0.475979		1.47956	0.773314	0.187486	-0.604167	-1.17002	-0.666172
Bradi1g15547	3	93.6631	72.2773	60.1438	52.6018	27.8485	28.6255		0.771673	0.642129	0.561606	0.297326	0.305622		1.48186	0.643551	0.167922	-0.12772	-1.09804	-1.06758
Bradi1g15640	3	8.14397	7.97252	5.82195	3.73021	2.70671	3.95462		0.978948	0.714879	0.458033	0.332357	0.485589		1.19798	1.12344	0.188512	-0.720846	-1.1658	-0.623286
Bradi1g15830	3	582.724	544.224	388.743	169.485	36.7282	72.1146		0.93393	0.667114	0.290849	0.0630284	0.123754		1.18687	1.02581	0.375403	-0.541804	-1.09715	-0.949124
Bradi1g15930	3	156.181	148.492	91.3716	7.93127	0.484406	0.868029		0.950768	0.585036	0.0507825	0.00310157	0.00555784		1.19562	1.09189	0.321303	-0.804354	-0.904817	-0.899641
Bradi1g16010	3	47.5021	24.4509	32.3622	6.27306	4.59056	0.272624		0.514733	0.681278	0.132058	0.0966391	0.00573921		1.51464	0.279184	0.703198	-0.695083	-0.785259	-1.01668
Bradi1g16230	3	15.821	10.4973	8.72341	2.92755	1.03149	2.43888		0.663506	0.551382	0.185042	0.0651973	0.154155		1.54725	0.623233	0.315338	-0.690636	-1.01973	-0.775453
Bradi1g16480	3	79.5553	95.5195	53.7496	28.5837	27.3242	18.412		1.20067	0.675626	0.359294	0.343461	0.231437		0.924674	1.43315	0.102737	-0.698821	-0.73894	-1.0228
Bradi1g16580	3	130.545	161.21	82.2269	23.2699	2.18288	54.6324		1.2349	0.629874	0.178252	0.0167213	0.418494		0.891002	1.38897	0.106352	-0.851065	-1.1935	-0.341762
Bradi1g16670	3	42.0276	55.007	43.9796	23.6866	15.444	38.6768		1.30883	1.04645	0.563597	0.367473	0.920271		0.385096	1.2845	0.520358	-0.885842	-1.45701	0.1529
Bradi1g17050	3	39.0045	29.4979	26.883	15.9854	14.0029	24.0803		0.756268	0.689228	0.409835	0.359008	0.617371		1.53267	0.498968	0.214642	-0.970302	-1.18587	-0.0901118
Bradi1g17220	3	63.579	61.0631	53.8357	36.7465	30.4184	41.4342		0.960429	0.846754	0.577966	0.478435	0.651696		1.156	0.971138	0.440095	-0.815566	-1.28053	-0.47113
Bradi1g17243	3	53.3794	51.7138	36.9338	12.7199	4.42629	10.8452		0.968798	0.691911	0.238293	0.0829213	0.203172		1.15049	1.07397	0.394968	-0.717428	-1.09844	-0.803553
Bradi1g17680	3	232.411	222.758	244.627	169.371	91.4067	188.384		0.958466	1.05256	0.728759	0.393298	0.810564		0.72353	0.552843	0.93954	-0.391163	-1.76977	-0.0549752
Bradi1g18020	3	210.311	247.756	246.343	142.604	62.7689	172.104		1.17804	1.17133	0.678059	0.298457	0.818327		0.423253	0.951591	0.931659	-0.532097	-1.65855	-0.115854
Bradi1g18050	3	1338.5	1087.71	887.957	834.444	564.577	644.834		0.81263	0.663397	0.623416	0.421798	0.481759		1.55711	0.680527	-0.017637	-0.204678	-1.14792	-0.867401
Bradi1g18560	3	15.066	14.9143	13.9796	8.0392	4.60748	7.80808		0.989928	0.927886	0.533598	0.30582	0.518257		0.967636	0.933728	0.724854	-0.602574	-1.36942	-0.65422
Bradi1g18960	3	41.2437	40.3894	31.3686	31.9739	20.0236	25.0702		0.979289	0.760567	0.775244	0.485495	0.607856		1.14812	1.04559	-0.0371661	0.035488	-1.39888	-0.793144
Bradi1g19220	3	408.735	478.885	291.301	140.945	56.2229	180.948		1.17163	0.712689	0.344833	0.137553	0.442703		0.915119	1.3453	0.194976	-0.727054	-1.2466	-0.481745
Bradi1g19660	3	77.0046	72.8614	51.3649	14.6699	5.06196	7.45425		0.946195	0.667036	0.190507	0.0657357	0.0968027		1.17634	1.05117	0.401691	-0.70697	-0.997255	-0.924977
Bradi1g19750	3	6.08594	5.51701	4.4409	3.63532	2.8423	2.68179		0.906518	0.729698	0.597332	0.467027	0.440654		1.34558	0.939546	0.171535	-0.403389	-0.969359	-1.08391
Bradi1g19810	3	130.476	101.625	71.4293	54.9152	40.3165	63.7955		0.778876	0.547451	0.420883	0.308995	0.488944		1.60886	0.739338	-0.170689	-0.668389	-1.10836	-0.400754
Bradi1g20080	3	36.9193	29.5296	29.5336	22.5649	19.9094	18.3028		0.799842	0.79995	0.611195	0.539267	0.49575		1.51958	0.479132	0.479698	-0.501472	-0.875366	-1.10157
Bradi1g20100	3	154.021	120.788	83.2703	100.455	40.614	98.1793		0.78423	0.540641	0.652212	0.26369	0.637439		1.43939	0.561141	-0.430346	0.0237837	-1.55762	-0.0363469
Bradi1g20220	3	760.725	592.263	520.447	476.881	403.536	353.928		0.778551	0.684146	0.626876	0.530463	0.465251		1.66613	0.509935	0.017046	-0.28196	-0.785338	-1.12581
Bradi1g20313	3	10.8699	12.8597	8.78661	5.33914	4.54573	8.25042		1.18306	0.808341	0.491184	0.418193	0.759013		0.764936	1.39182	0.108592	-0.977525	-1.22749	-0.0603343
Bradi1g20730	3	122.222	102.515	74.4161	65.0094	45.5573	86.7842		0.838765	0.608862	0.531898	0.372743	0.710056		1.44467	0.723397	-0.305049	-0.649341	-1.3613	0.147631
Bradi1g21350	3	6.57812	5.77775	5.29574	1.9623	1.0609	1.45153		0.878328	0.805054	0.298307	0.161277	0.22066		1.17635	0.850614	0.654444	-0.702226	-1.06908	-0.910103
Bradi1g21780	3	188.32	175.211	99.488	66.5362	32.2583	91.0854		0.930393	0.528293	0.353315	0.171295	0.483675		1.29727	1.08338	-0.152215	-0.689896	-1.24922	-0.289321
Bradi1g22370	3	134.062	83.4895	79.5229	71.6298	16.3575	68.1866		0.622765	0.593178	0.534301	0.122014	0.508618		1.55563	0.211278	0.105836	-0.103982	-1.57325	-0.19551
Bradi1g22540	3	14.7255	14.2539	11.9984	3.21926	4.14068	9.18785		0.967971	0.814799	0.218618	0.28119	0.623939		1.03019	0.935625	0.483374	-1.27689	-1.09214	-0.0801531
Bradi1g22880	3	57.7004	48.7113	22.1977	1.02945	0.239622	1.64561		0.844211	0.384706	0.0178414	0.00415286	0.0285199		1.38944	1.04037	0.0107572	-0.811275	-0.841947	-0.787348
Bradi1g23010	3	73.6259	59.1519	31.5631	23.0627	20.1707	35.0554		0.803412	0.428696	0.313241	0.273963	0.476128		1.55687	0.87788	-0.416344	-0.81511	-0.950775	-0.25252
Bradi1g23192	3	101.891	93.9851	74.8768	29.125	27.263	25.7756		0.922411	0.734874	0.285846	0.267571	0.252973		1.21157	0.989188	0.451684	-0.83528	-0.887659	-0.929498
Bradi1g23320	3	7.21549	7.4454	5.82149	3.37737	4.07505	3.20616		1.03186	0.806805	0.468072	0.564764	0.444344		1.06589	1.18688	0.332255	-0.95403	-0.586859	-1.04414
Bradi1g23410	3	25.2117	18.5333	16.4299	14.0399	11.574	12.2392		0.735108	0.651676	0.556879	0.459071	0.485455		1.75144	0.433302	0.0181378	-0.453588	-0.940291	-0.809003
Bradi1g23770	3	204.571	183.975	145.498	94.947	73.5505	113.743		0.899317	0.711232	0.464126	0.359534	0.556009		1.33494	0.933684	0.184104	-0.800692	-1.21753	-0.434511
Bradi1g23895	3	27.9254	25.9679	19.3693	6.89628	7.08594	4.37178		0.9299	0.693608	0.246954	0.253745	0.156552		1.2097	1.02259	0.391878	-0.800332	-0.782204	-1.04163
Bradi1g23900	3	122.783	114.915	103.987	76.3801	58.8102	85.6062		0.935922	0.846919	0.622074	0.478977	0.697216		1.18846	0.866434	0.419138	-0.71084	-1.42998	-0.333208
Bradi1g24010	3	6.48761	5.73438	4.67349	3.44177	1.56556	2.4946		0.883898	0.720372	0.530514	0.241316	0.384518		1.27167	0.876084	0.31892	-0.32796	-1.31331	-0.825397
Bradi1g24121	3	14.9193	10.9816	9.27667	6.28916	5.69158	9.18531		0.736069	0.621791	0.421546	0.381492	0.615668		1.64535	0.473488	-0.0339057	-0.922997	-1.10084	-0.0610934
Bradi1g24147	3	19.9303	17.1813	15.783	12.2213	7.18602	15.469		0.862072	0.791912	0.613206	0.360559	0.776157		1.19847	0.577066	0.26098	-0.544136	-1.68237	0.189998
Bradi1g24200	3	36.7633	50.9022	37.7293	13.2948	13.2531	21.866		1.38459	1.02628	0.361632	0.360499	0.594777		0.511408	1.439	0.574783	-1.02826	-1.03099	-0.465941
Bradi1g24340	3	210.222	192.476	176.195	129.231	44.2135	128.286		0.915586	0.838139	0.614737	0.210318	0.610242		1.0532	0.758644	0.488401	-0.291129	-1.7023	-0.306814
Bradi1g24347	3	12.2734	11.1452	8.28393	6.06066	6.02164	6.54347		0.908079	0.674951	0.493806	0.490626	0.533144		1.42582	1.01181	-0.0382074	-0.854092	-0.868413	-0.676914
Bradi1g24870	3	2018.12	1666.27	1087.49	1084.29	618.327	687.532		0.825655	0.538862	0.537275	0.306387	0.340679		1.4985	0.858989	-0.192995	-0.198815	-1.04573	-0.919947
Bradi1g24900	3	38.0813	37.7032	33.925	20.6447	16.9141	28.8718		0.990073	0.890857	0.542122	0.444159	0.758163		0.978373	0.93598	0.512288	-0.976959	-1.39531	-0.054375
Bradi1g24980	3	2831.76	2688.27	2034.69	1377.62	639.516	1306.39		0.949328	0.718524	0.486488	0.225837	0.461333		1.18804	1.02069	0.258487	-0.507791	-1.36857	-0.590861
Bradi1g25107	3	7.22166	6.78354	4.63576	2.68539	3.44009	3.07435		0.939332	0.641925	0.371853	0.476357	0.425713		1.3253	1.10038	-0.00224374	-1.00352	-0.616075	-0.803836
Bradi1g25117	3	34.4211	22.1475	29.5837	9.63589	3.81352	13.4836		0.643428	0.859464	0.279942	0.11079	0.391724		1.30844	0.277251	0.902013	-0.773931	-1.26311	-0.450663
Bradi1g25350	3	415.484	405.843	260.433	122.043	74.0869	83.9065		0.976794	0.626817	0.293736	0.178314	0.201949		1.1995	1.13815	0.212941	-0.667603	-0.972734	-0.910254
Bradi1g25370	3	96.7528	96.1428	27.3451	17.9762	25.2147	35.1481		0.993695	0.282628	0.185795	0.26061	0.363277		1.28478	1.2681	-0.612954	-0.869115	-0.671201	-0.399607
Bradi1g25447	3	33.2262	42.0842	27.3899	10.937	6.6396	12.6692		1.26659	0.824346	0.329169	0.19983	0.381301		0.781221	1.40641	0.369293	-0.791957	-1.09527	-0.6697
Bradi1g25800	3	15.914	14.6476	14.3452	8.23652	5.89496	11.4254		0.92042	0.90142	0.517563	0.370425	0.717946		1.04776	0.729558	0.653587	-0.88127	-1.4696	-0.0800341
Bradi1g25837	3	357.822	336.333	264.507	169.729	213.1	269.93		0.939946	0.739214	0.47434	0.595549	0.754369		1.25168	0.950319	-0.0569858	-1.38616	-0.777917	0.0190671
Bradi1g26000	3	430.541	606.138	563.286	92.4406	30.4979	258.175		1.40785	1.30832	0.214708	0.0708363	0.599652		0.415242	1.14177	0.964472	-0.983641	-1.23993	-0.297919
Bradi1g26020	3	109.24	135.485	86.7691	44.907	22.6555	15.0272		1.24025	0.7943	0.411087	0.207392	0.137562		0.821226	1.35702	0.362481	-0.49215	-0.946424	-1.10216
Bradi1g26100	3	12.1846	11.3905	9.94263	4.19591	2.90365	5.65554		0.934828	0.816002	0.344363	0.238306	0.464156		1.13074	0.929974	0.563924	-0.888984	-1.2157	-0.519955
Bradi1g26260	3	128.684	139.476	58.8068	25.6468	20.5856	29.5246		1.08386	0.456986	0.199301	0.15997	0.229435		1.14743	1.34856	-0.154954	-0.772993	-0.867325	-0.700719
Bradi1g26760	3	32.839	28.567	23.5915	18.449	10.3014	19.6696		0.869911	0.718397	0.5618	0.313692	0.598971		1.33012	0.794198	0.170012	-0.475117	-1.49723	-0.321981
Bradi1g26810	3	36.9885	33.9818	35.1074	16.1638	11.9884	29.0148		0.918712	0.949144	0.436995	0.32411	0.784428		0.923547	0.639648	0.74593	-1.04276	-1.43702	0.170656
Bradi1g26880	3	107.458	86.7552	58.8587	64.7345	34.2765	76.4933		0.807341	0.547737	0.602417	0.318976	0.711844		1.4373	0.611396	-0.501483	-0.267081	-1.48214	0.202017
Bradi1g28310	3	95.7945	102.477	77.1662	56.6403	21.2691	52.2569		1.06976	0.805539	0.591268	0.222028	0.54551		0.929029	1.14922	0.315198	-0.361159	-1.52669	-0.505597
Bradi1g28330	3	326.238	274.512	213.812	142.236	83.6975	211.442		0.841446	0.655385	0.435988	0.256553	0.648121		1.34482	0.753207	0.0589652	-0.759664	-1.42918	0.0318589
Bradi1g28380	3	15.4134	14.5327	10.715	9.08519	10.5901	7.58984		0.942861	0.695172	0.589433	0.687073	0.492417		1.33642	1.04882	-0.197918	-0.730152	-0.238689	-1.21848
Bradi1g28840	3	56.9489	53.4198	49.7325	29.1254	26.4583	45.597		0.93803	0.873283	0.511431	0.464598	0.800665		1.0468	0.771145	0.483142	-1.12644	-1.33477	0.160124
Bradi1g29000	3	1770.51	1572.76	1244.37	1172.52	804.281	929.849		0.888309	0.702828	0.662249	0.454264	0.525187		1.41163	0.876312	-0.0126749	-0.207168	-1.20401	-0.86409
Bradi1g29040	3	31.039	30.2189	16.9537	3.77783	1.02361	15.0553		0.973577	0.546207	0.121712	0.0329782	0.485045		1.15943	1.09472	0.0480526	-0.991575	-1.20889	-0.101739
Bradi1g29260	3	34.5077	27.1241	13.6929	13.8946	12.0864	16.4703		0.786031	0.396808	0.402653	0.350253	0.477295		1.63797	0.825107	-0.653549	-0.631342	-0.830408	-0.347779
Bradi1g29267	3	7.78311	5.50581	2.95476	1.52886	1.40077	2.11292		0.707406	0.379637	0.196433	0.179975	0.271476		1.65193	0.763721	-0.231267	-0.78741	-0.83737	-0.559607
Bradi1g29457	3	63.7501	72.0557	44.4861	24.7639	21.0218	16.8368		1.13028	0.69782	0.388454	0.329753	0.264107		0.993951	1.3488	0.170912	-0.671701	-0.831583	-1.01038
Bradi1g29658	3	6.77721	6.37774	6.03021	5.24362	2.78711	4.68692		0.941057	0.889777	0.773714	0.411247	0.691571		1.00426	0.729502	0.490462	-0.050564	-1.74019	-0.433471
Bradi1g30273	3	188.271	178.359	149.091	96.082	64.2463	99.5316		0.947349	0.791895	0.510338	0.341243	0.52866		1.18027	0.981996	0.39659	-0.663693	-1.30047	-0.594695
Bradi1g30510	3	63.5822	60.9434	55.8334	31.9715	21.2135	42.2076		0.958498	0.878128	0.502836	0.333638	0.663826		1.03323	0.878524	0.578933	-0.82003	-1.45074	-0.219913
Bradi1g30656	3	92.9016	85.7117	67.0237	42.7533	41.1886	56.8036		0.922608	0.721448	0.4602	0.443357	0.611438		1.31805	0.985592	0.121455	-1.00081	-1.07316	-0.351125
Bradi1g30870	3	337.373	205.224	109.509	29.8117	27.6685	7.15742		0.6083	0.324593	0.0883641	0.0820114	0.0212151		1.68111	0.661647	-0.0767471	-0.691569	-0.708103	-0.866335
Bradi1g31050	3	14.3816	15.3433	3.68943	2.2828	1.23989	0.677963		1.06687	0.256538	0.15873	0.0862133	0.0471409		1.20332	1.34597	-0.382653	-0.5913	-0.745995	-0.829345
Bradi1g31121	3	9.00833	7.57563	7.56017	4.24579	2.28735	4.03278		0.840959	0.839243	0.471318	0.253916	0.447673		1.22851	0.682466	0.676574	-0.586649	-1.33307	-0.667832
Bradi1g31670	3	11.8634	12.0958	9.0641	5.54234	2.17751	4.54679		1.01959	0.76404	0.46718	0.183549	0.383263		1.05607	1.11295	0.37097	-0.490945	-1.31445	-0.734594
Bradi1g32521	3	8.47019	5.61719	3.15688	1.3671	1.01745	1.43617		0.663172	0.372705	0.161401	0.120121	0.169556		1.66662	0.707854	-0.118948	-0.720412	-0.837913	-0.6972
Bradi1g33300	3	34.2048	30.961	31.4504	24.0773	14.7464	20.9347		0.905167	0.919476	0.703917	0.431121	0.61204		1.09273	0.65741	0.723094	-0.266413	-1.51866	-0.688164
Bradi1g33670	3	35.6274	33.1328	24.0382	8.29024	12.0778	8.98971		0.92998	0.674712	0.232693	0.339004	0.252326		1.24388	1.04064	0.299715	-0.983263	-0.674691	-0.926279
Bradi1g33810	3	7.22069	4.15856	3.15001	0.321666	0.991428	1.64091		0.575922	0.436248	0.0445479	0.137304	0.227251		1.6974	0.490553	0.0930657	-1.02164	-0.757676	-0.501702
Bradi1g33827	3	19.7778	16.6522	8.79761	1.9613	6.79287	7.20676		0.841966	0.444823	0.0991668	0.34346	0.364387		1.43196	0.964753	-0.209341	-1.23122	-0.509007	-0.447139
Bradi1g33930	3	45.5592	45.9383	33.2929	25.9511	36.4623	22.1289		1.00832	0.73076	0.569613	0.800328	0.485717		1.08491	1.12345	-0.162264	-0.90873	0.159988	-1.29735
Bradi1g34500	3	8.35467	5.87878	1.89128	0.948167	0.150471	3.61024		0.703651	0.226374	0.113489	0.0180104	0.432122		1.5509	0.764429	-0.502201	-0.801782	-1.05517	0.0438265
Bradi1g34670	3	18.104	22.921	18.9294	10.9186	7.21859	12.422		1.26607	1.04559	0.603105	0.398729	0.686144		0.51519	1.33737	0.656076	-0.711234	-1.34277	-0.454639
Bradi1g35460	3	9.40956	8.58458	6.70856	3.21652	2.74954	5.29099		0.912326	0.712952	0.341835	0.292207	0.5623		1.2454	0.944658	0.260754	-1.01228	-1.18252	-0.256024
Bradi1g35477	3	16.6138	13.9671	12.5763	5.58011	2.81196	3.40407		0.840695	0.756979	0.335873	0.169255	0.204895		1.25445	0.809091	0.575051	-0.602207	-1.06801	-0.968374
Bradi1g35490	3	100.751	101.633	73.5033	43.7386	71.6256	71.6812		1.00875	0.729553	0.434125	0.710917	0.711468		1.08921	1.1299	-0.168587	-1.54257	-0.255262	-0.252697
Bradi1g36420	3	15.6616	17.4582	18.0447	11.1903	5.60783	10.4437		1.11471	1.15216	0.714509	0.358063	0.666836		0.536597	0.908258	1.02959	-0.388376	-1.54324	-0.542832
Bradi1g36460	3	74.6221	89.6256	73.7244	42.4712	34.7292	48.7383		1.20106	0.987971	0.569151	0.465401	0.653135		0.644401	1.33647	0.602997	-0.838609	-1.19572	-0.549531
Bradi1g36640	3	471.004	432.937	325.959	229.12	196.38	267.554		0.919179	0.692052	0.486449	0.416938	0.568051		1.35291	1.01074	0.0491419	-0.821328	-1.11562	-0.475846
Bradi1g36980	3	54.6034	44.0373	53.8615	16.0493	8.79035	17.3429		0.806494	0.986413	0.293924	0.160985	0.317615		1.07083	0.560154	1.03497	-0.792548	-1.14338	-0.730026
Bradi1g37090	3	9.76029	10.6844	5.52805	4.79507	2.19038	3.57779		1.09468	0.566382	0.491283	0.224417	0.366566		1.077	1.3481	-0.164668	-0.379711	-1.14388	-0.736839
Bradi1g38080	3	27.0878	28.4245	23.4366	12.6738	5.67622	14.6414		1.04934	0.865207	0.467879	0.209549	0.540516		0.931343	1.07899	0.528009	-0.660901	-1.43389	-0.443553
Bradi1g38280	3	53.6779	54.3716	45.7286	28.8695	22.6703	34.1272		1.01292	0.851907	0.537829	0.42234	0.635777		1.03499	1.08713	0.437517	-0.829623	-1.29556	-0.434456
Bradi1g38325	3	8.31935	7.70997	5.30063	1.7042	0.707601	1.92006		0.926751	0.637144	0.204848	0.0850547	0.230794		1.22905	1.04377	0.311233	-0.782226	-1.08523	-0.716596
Bradi1g38330	3	7.01738	5.70246	4.24816	1.70529	0.62827	1.68825		0.81262	0.605377	0.243009	0.0895305	0.240582		1.3796	0.864108	0.29397	-0.702924	-1.12515	-0.709602
Bradi1g38400	3	6.50252	6.20576	6.67554	3.15148	2.38767	3.96133		0.954362	1.02661	0.484655	0.367191	0.6092		0.899151	0.741119	0.991292	-0.885361	-1.29211	-0.454093
Bradi1g38687	3	749.493	603.213	481.394	388.522	189.006	169.076		0.804828	0.642293	0.51838	0.252179	0.225587		1.39361	0.755307	0.223746	-0.181501	-1.0521	-1.13906
Bradi1g38780	3	27.6117	28.4044	24.0981	9.87353	3.12528	3.31453		1.02871	0.872751	0.357585	0.113187	0.120041		0.962731	1.02886	0.669622	-0.517029	-1.07999	-1.0642
Bradi1g39195	3	447.336	297.085	307.314	237.807	179.837	205.466		0.664121	0.686988	0.531607	0.402019	0.459311		1.74592	0.186268	0.292449	-0.429065	-1.03081	-0.764769
Bradi1g39223	3	120.951	87.5643	70.264	39.438	26.7927	21.6029		0.723963	0.580928	0.326065	0.221517	0.178608		1.53785	0.679958	0.235417	-0.556674	-0.8816	-1.01496
Bradi1g41820	3	517.884	456.611	378.591	311.13	154.439	257.467		0.881685	0.731034	0.600772	0.298212	0.497151		1.29115	0.830824	0.24469	-0.262117	-1.43928	-0.665269
Bradi1g41830	3	317.041	284.585	212.034	132.933	89.7464	108.747		0.897628	0.668789	0.419291	0.283075	0.343007		1.32321	0.982888	0.222147	-0.607273	-1.0601	-0.860868
Bradi1g42650	3	13.3921	12.4352	12.2363	6.86418	6.47283	8.95875		0.928553	0.913699	0.512555	0.483333	0.668959		1.10129	0.785053	0.719308	-1.05619	-1.18553	-0.363931
Bradi1g42707	3	41.2053	43.5655	30.7077	20.2001	16.3734	17.7322		1.05728	0.745238	0.49023	0.397361	0.430337		1.07201	1.26803	0.200183	-0.672485	-0.990293	-0.877445
Bradi1g43560	3	10.1711	12.0872	9.01853	2.6368	0.883579	2.49446		1.18838	0.886679	0.259244	0.0868712	0.245249		0.83189	1.23481	0.589505	-0.752528	-1.12122	-0.782462
Bradi1g43950	3	703.128	635.902	463.364	188.291	77.3356	419.055		0.90439	0.659004	0.26779	0.109988	0.595987		1.17908	0.904446	0.199574	-0.924188	-1.37748	0.018558
Bradi1g44190	3	57.7423	56.4182	45.1778	29.3925	20.3475	41.1106		0.977068	0.782403	0.509029	0.352385	0.711966		1.08475	0.995222	0.235257	-0.831985	-1.44352	-0.0397248
Bradi1g44200	3	45.9166	34.9093	26.1485	13.8927	14.2182	19.4723		0.760278	0.569479	0.302564	0.309653	0.424079		1.58985	0.72167	0.0306758	-0.935982	-0.910308	-0.495903
Bradi1g44220	3	7.01051	5.23327	6.205	2.58943	2.15415	3.56351		0.746488	0.885099	0.369364	0.307275	0.508309		1.28307	0.389244	0.877957	-0.940416	-1.15933	-0.450526
Bradi1g44390	3	124.216	114.947	97.9543	23.3863	16.8307	7.13739		0.925386	0.788583	0.188272	0.135496	0.0574597		1.1174	0.945191	0.629442	-0.756102	-0.877911	-1.05802
Bradi1g44430	3	87.0442	69.025	48.0649	26.7111	32.0666	34.4129		0.792988	0.55219	0.306868	0.368395	0.395349		1.57202	0.816447	-0.0624443	-0.957846	-0.73328	-0.634899
Bradi1g44680	3	439.365	386.162	138.43	33.9303	33.1369	37.7544		0.878909	0.315068	0.0772258	0.0754201	0.0859296		1.39788	1.11319	-0.212437	-0.771619	-0.775864	-0.751156
Bradi1g44690	3	192.609	174.098	76.1041	17.6705	22.5922	14.884		0.903895	0.395123	0.0917432	0.117296	0.077276		1.35097	1.12283	-0.0849021	-0.805072	-0.744415	-0.839415
Bradi1g45200	3	28.0711	25.1558	23.3629	4.74447	5.53787	8.02448		0.896145	0.832277	0.169016	0.19728	0.285862		1.13462	0.864709	0.69872	-1.02506	-0.951605	-0.721384
Bradi1g45872	3	8.78794	6.03298	6.47693	3.682	2.41554	4.2102		0.686507	0.737024	0.418983	0.274869	0.479088		1.53765	0.334311	0.528222	-0.692571	-1.24575	-0.46186
Bradi1g45910	3	66.72	81.0549	52.7211	26.018	24.348	17.2758		1.21485	0.790184	0.389959	0.364928	0.25893		0.846545	1.39738	0.308619	-0.71748	-0.781654	-1.05341
Bradi1g46470	3	57.987	92.47	17.245	4.26242	3.33145	2.76526		1.59467	0.297394	0.0735064	0.0574516	0.0476876		0.758618	1.68265	-0.333132	-0.681022	-0.705969	-0.721141
Bradi1g46596	3	477.311	450.359	410.786	316.831	219.063	379.97		0.943534	0.860625	0.663784	0.458951	0.796063		1.0691	0.785467	0.369019	-0.619718	-1.64859	0.0447245
Bradi1g46602	3	7.92494	9.70565	3.55423	3.48905	2.95064	2.50427		1.2247	0.448486	0.440262	0.372324	0.315999		0.962521	1.55284	-0.486398	-0.508005	-0.68649	-0.834465
Bradi1g46622	3	290.258	249.271	197.055	102.182	22.1155	138.315		0.858791	0.678897	0.352037	0.0761925	0.476525		1.25136	0.836818	0.308706	-0.65085	-1.46064	-0.285394
Bradi1g47210	3	43.6286	39.1734	34.9518	11.111	1.14183	13.6879		0.897884	0.801122	0.254672	0.0261715	0.313737		1.12485	0.870202	0.628901	-0.73381	-1.30363	-0.586515
Bradi1g47250	3	46.6421	32.0089	22.4407	11.7242	1.80822	10.9134		0.686267	0.481124	0.251366	0.0387679	0.233981		1.57289	0.677981	0.0928195	-0.56256	-1.16899	-0.612149
Bradi1g47767	3	777.779	875.888	693.011	279.239	126.005	272.786		1.12614	0.891013	0.359021	0.162006	0.350724		0.869016	1.18056	0.599834	-0.714107	-1.20071	-0.734599
Bradi1g47920	3	323.221	284.694	239.773	175.57	139.35	174.364		0.880803	0.741823	0.543188	0.43113	0.539459		1.3991	0.862176	0.236137	-0.658617	-1.16338	-0.675413
Bradi1g48470	3	42.4603	33.7676	21.7799	3.98785	3.35111	7.07023		0.795275	0.512946	0.0939195	0.0789233	0.166514		1.42372	0.902063	0.182657	-0.88507	-0.923282	-0.700092
Bradi1g49470	3	151.794	136.814	107.871	8.78069	3.18004	11.8646		0.901311	0.710643	0.0578461	0.0209497	0.0781623		1.17544	0.960027	0.543846	-0.881041	-0.961576	-0.836696
Bradi1g49527	3	5.65247	6.5839	5.60154	3.13606	0.906367	2.10402		1.16478	0.99099	0.554813	0.160349	0.37223		0.727426	1.1368	0.705043	-0.378566	-1.35854	-0.832162
Bradi1g49537	3	97.4292	85.7925	70.7335	16.9877	6.41975	20.3711		0.880563	0.725999	0.174359	0.0658915	0.209086		1.20834	0.914219	0.533595	-0.824854	-1.09196	-0.739338
Bradi1g49690	3	71.9367	37.276	31.662	10.2442	5.71728	1.27177		0.518177	0.440136	0.142406	0.0794765	0.017679		1.71326	0.410587	0.199593	-0.605362	-0.775501	-0.942579
Bradi1g50760	3	10.611	7.73991	7.38863	1.72067	2.31593	5.309		0.729423	0.696318	0.162159	0.218257	0.50033		1.39333	0.553529	0.450779	-1.20712	-1.033	-0.157519
Bradi1g51330	3	13.8304	13.2404	7.84639	6.99615	5.98276	4.97951		0.957343	0.567331	0.505854	0.432581	0.360042		1.3249	1.16913	-0.255119	-0.47962	-0.747198	-1.0121
Bradi1g51830	3	11.2878	12.2843	10.5076	5.77323	4.28915	6.06334		1.08828	0.930878	0.511456	0.379979	0.537156		0.863978	1.1588	0.63314	-0.767557	-1.20663	-0.681727
Bradi1g52011	3	164.65	115.681	105.935	79.2073	18.0171	85.2386		0.702586	0.643395	0.481064	0.109427	0.517695		1.44612	0.432473	0.230736	-0.322519	-1.58914	-0.197674
Bradi1g52460	3	1117.95	1007.93	697.384	396.418	137.582	521.13		0.901587	0.623804	0.354593	0.123066	0.466147		1.26686	0.971282	0.136971	-0.671593	-1.36697	-0.336545
Bradi1g53207	3	131.595	124.789	87.9118	44.4085	39.7759	43.1355		0.948276	0.668046	0.337462	0.302259	0.327789		1.25165	1.09088	0.219875	-0.807638	-0.917057	-0.837705
Bradi1g53260	3	10.7639	9.6419	5.75048	3.61613	1.73199	2.89865		0.895766	0.53424	0.335951	0.160908	0.269295		1.35294	1.05116	0.00447776	-0.569605	-1.07639	-0.762586
Bradi1g54250	3	321.529	405.251	326.879	139.424	92.21	151.501		1.26039	1.01664	0.433629	0.286786	0.471191		0.643595	1.3002	0.685557	-0.784594	-1.15488	-0.689878
Bradi1g54370	3	201.904	171.111	142.587	104.128	80.9642	91.178		0.847488	0.706209	0.515727	0.401003	0.45159		1.45323	0.813279	0.22046	-0.578818	-1.06021	-0.847943
Bradi1g54390	3	114.18	131.356	109.097	61.5328	40.222	95.6069		1.15042	0.955476	0.538909	0.352267	0.837332		0.642713	1.14038	0.495407	-0.882775	-1.50027	0.104537
Bradi1g54420	3	20.9185	12.4491	10.0854	3.95726	0.76462	1.27352		0.595122	0.48213	0.189175	0.0365523	0.0608799		1.62415	0.539072	0.236251	-0.548869	-0.957898	-0.8927
Bradi1g54650	3	58.3986	67.7355	36.78	14.1179	9.46857	4.78877		1.15988	0.62981	0.241751	0.162137	0.0820015		0.993131	1.34282	0.183459	-0.665295	-0.839424	-1.01469
Bradi1g55120	3	287.765	332.217	332.16	160.493	122.815	209.413		1.15447	1.15427	0.557721	0.426789	0.727723		0.523242	1.0186	1.01796	-0.89503	-1.31489	-0.349877
Bradi1g55560	3	48.8919	33.2291	10.2786	1.10871	0.28381	2.55838		0.679644	0.210231	0.0226767	0.00580485	0.0523274		1.61725	0.845762	-0.284693	-0.736365	-0.776997	-0.66496
Bradi1g55620	3	58.962	40.5132	18.5765	4.29307	0.751496	6.0914		0.687108	0.315059	0.0728108	0.0127454	0.103311		1.59971	0.811247	-0.12628	-0.736723	-0.888082	-0.659867
Bradi1g55650	3	84.7102	92.5918	41.9473	24.7873	22.8088	22.7678		1.09304	0.495186	0.292613	0.269257	0.268773		1.13192	1.37673	-0.196357	-0.729371	-0.790825	-0.792099
Bradi1g55720	3	218.539	253.006	71.6533	21.8031	35.0783	35.4225		1.15772	0.327875	0.0997679	0.160513	0.162088		1.09849	1.43469	-0.334203	-0.820433	-0.690949	-0.687592
Bradi1g56540	3	31.8158	34.0886	35.6697	15.9214	9.01909	20.5689		1.07144	1.12113	0.500424	0.283479	0.646501		0.667163	0.874829	1.01929	-0.785089	-1.41574	-0.360448
Bradi1g56930	3	102.877	91.7694	61.2016	44.1707	23.8279	67.3874		0.892032	0.594903	0.429356	0.231616	0.655031		1.28456	0.905804	-0.136534	-0.717275	-1.41095	0.0743979
Bradi1g57040	3	73.7343	74.3077	54.5596	13.3503	5.99094	13.278		1.00778	0.739948	0.181059	0.0812503	0.180079		1.08077	1.09872	0.480626	-0.809171	-1.03951	-0.811433
Bradi1g57880	3	19.854	15.1345	11.2045	2.54015	3.29215	9.52367		0.762291	0.564343	0.127942	0.165818	0.479685		1.42923	0.726301	0.140947	-1.14954	-1.03754	-0.109398
Bradi1g58160	3	1497.93	1355.42	1034.65	862.845	588.27	1094.03		0.904863	0.690718	0.576026	0.392723	0.730364		1.29385	0.860754	-0.114099	-0.636215	-1.47067	0.0663793
Bradi1g58190	3	77.7717	67.2681	56.8453	47.4727	40.4368	32.9016		0.864944	0.730925	0.610411	0.519943	0.423054		1.42316	0.800028	0.181688	-0.374345	-0.791749	-1.23878
Bradi1g58210	3	1519	1825.27	1500.66	861.82	247.113	765.502		1.20163	0.987929	0.567362	0.162682	0.503952		0.673501	1.19034	0.642558	-0.435507	-1.47285	-0.598048
Bradi1g58220	3	312.577	315.717	230.656	87.7152	15.0215	56.5429		1.01004	0.737916	0.280619	0.0480568	0.180892		1.07146	1.09501	0.457098	-0.614878	-1.16004	-0.848653
Bradi1g58340	3	66.9467	65.7137	49.6214	14.4428	6.16148	14.0263		0.981583	0.741207	0.215735	0.0920356	0.209514		1.10776	1.06341	0.484526	-0.78094	-1.07884	-0.795921
Bradi1g58350	3	3439.85	2928.96	2184.81	1582.51	809.323	1354.01		0.851479	0.635146	0.460051	0.235278	0.393625		1.39488	0.882175	0.135377	-0.469063	-1.245	-0.698371
Bradi1g58720	3	55.9798	57.1192	22.6107	23.2344	15.8851	18.9822		1.02035	0.403908	0.41505	0.283766	0.339091		1.24807	1.30813	-0.510828	-0.477953	-0.865334	-0.702087
Bradi1g59120	3	11.1518	8.13716	6.12927	3.12059	1.34967	4.64654		0.729669	0.549619	0.279828	0.121026	0.416661		1.52602	0.673448	0.105606	-0.745263	-1.24609	-0.313718
Bradi1g60440	3	27.9331	31.3281	28.0475	15.9542	10.9047	12.0311		1.12154	1.0041	0.57116	0.390387	0.430712		0.759924	1.13383	0.772525	-0.559361	-1.11549	-0.991433
Bradi1g60520	3	5.79176	6.67957	4.89197	4.2283	2.57708	2.64942		1.15329	0.844643	0.730055	0.444956	0.457447		0.796855	1.33196	0.254525	-0.145488	-1.14073	-1.09713
Bradi1g60720	3	51.7448	45.1811	29.2376	28.4123	24.6971	22.7415		0.873152	0.565034	0.549085	0.477288	0.439494		1.5207	0.9685	-0.372819	-0.442251	-0.754803	-0.919329
Bradi1g60756	3	21.6598	19.22	15.6605	10.3558	13.1125	15.2886		0.887361	0.723025	0.478113	0.605384	0.705854		1.41673	0.818406	-0.0545237	-1.35546	-0.679416	-0.145732
Bradi1g60852	3	73.0272	89.5787	66.5743	39.35	25.2054	33.9925		1.22665	0.911638	0.538841	0.345152	0.465477		0.724423	1.37586	0.47045	-0.601055	-1.15776	-0.811918
Bradi1g60921	3	22.9526	13.0309	13.7154	5.65997	2.99845	7.08819		0.567731	0.597554	0.246594	0.130637	0.308819		1.66346	0.293237	0.387774	-0.724718	-1.09228	-0.527475
Bradi1g60950	3	14.3425	13.9124	10.9112	6.35136	2.46499	5.72476		0.970015	0.760761	0.442836	0.171866	0.399147		1.11565	1.02665	0.405593	-0.537999	-1.34223	-0.667666
Bradi1g60960	3	107.481	81.0838	58.0594	25.2928	8.58531	15.1983		0.754404	0.540185	0.235325	0.0798777	0.141405		1.467	0.801607	0.221222	-0.60474	-1.02589	-0.859198
Bradi1g60970	3	130.302	94.9138	77.9147	44.5382	19.2132	43.0322		0.728412	0.597954	0.341807	0.147451	0.330249		1.52522	0.654415	0.236119	-0.585175	-1.20834	-0.622232
Bradi1g61110	3	28.132	23.2201	19.9518	7.31983	5.41494	9.85664		0.8254	0.709221	0.260196	0.192484	0.350372		1.33169	0.807683	0.45901	-0.8886	-1.09182	-0.617966
Bradi1g61850	3	24.2063	19.7099	14.9819	4.10155	5.62809	13.8742		0.814244	0.618926	0.169441	0.232505	0.573163		1.33778	0.762483	0.157576	-1.2345	-1.03919	0.0158466
Bradi1g62240	3	204.581	197.989	152.883	87.594	31.8158	79.5741		0.967776	0.747295	0.428162	0.155517	0.388961		1.12446	1.03044	0.387123	-0.54404	-1.33956	-0.658421
Bradi1g62300	3	1359.52	1415.48	660.152	345.097	311.403	445.543		1.04116	0.485577	0.253837	0.229054	0.327721		1.19653	1.30751	-0.190483	-0.815311	-0.882134	-0.616103
Bradi1g63060	3	29.5473	23.9732	16.5226	8.21755	3.43655	2.47645		0.81135	0.559189	0.278115	0.116307	0.0838128		1.38761	0.889189	0.222971	-0.519638	-0.947141	-1.03299
Bradi1g63270	3	202.226	194.303	60.0713	59.4798	63.6026	33.9288		0.960824	0.297051	0.294126	0.314513	0.167777		1.33008	1.22466	-0.561496	-0.569368	-0.514507	-0.909361
Bradi1g63927	3	13.1177	10.6572	4.97825	0.514728	0.0597377	3.59527		0.81243	0.379506	0.0392391	0.00455397	0.274077		1.42696	0.966833	-0.0951684	-0.929871	-1.01496	-0.353794
Bradi1g64180	3	24.7635	25.4245	22.1598	16.3087	12.0066	15.0171		1.02669	0.89486	0.65858	0.48485	0.606421		0.981632	1.09996	0.515535	-0.531915	-1.30207	-0.763141
Bradi1g64267	3	204.207	231.963	165.392	107.514	53.9078	151.72		1.13592	0.809927	0.526499	0.263987	0.742973		0.80054	1.22987	0.200178	-0.695057	-1.52422	-0.0113024
Bradi1g64950	3	33.8561	43.2301	24.6006	4.19795	3.61889	7.36824		1.27688	0.726623	0.123994	0.10689	0.217634		0.850522	1.40506	0.302998	-0.903955	-0.93821	-0.716411
Bradi1g65340	3	20.8128	22.9089	19.9969	11.5297	6.35313	11.9231		1.10071	0.960799	0.553972	0.305251	0.572875		0.795903	1.11518	0.671632	-0.618056	-1.40653	-0.558131
Bradi1g65430	3	9.52444	10.9516	8.92524	3.24901	1.49427	3.50941		1.14984	0.937088	0.341124	0.156888	0.368464		0.816736	1.17551	0.666098	-0.760889	-1.20203	-0.695426
Bradi1g65530	3	7.95371	6.23907	6.75753	3.89229	1.77132	3.40755		0.784422	0.849608	0.489368	0.222703	0.428423		1.25712	0.526471	0.747403	-0.473546	-1.37734	-0.680106
Bradi1g65580	3	716.266	804.232	571.445	311.267	204.484	360.95		1.12281	0.797811	0.434568	0.285486	0.503932		0.925211	1.29266	0.320268	-0.76654	-1.21259	-0.559006
Bradi1g65750	3	64.4861	47.0041	39.5299	11.5298	5.67541	10.4877		0.728902	0.612999	0.178795	0.0880098	0.162635		1.44522	0.717125	0.405839	-0.760319	-1.00414	-0.803722
Bradi1g65810	3	647.125	702.713	394.914	161.402	131.436	53.3881		1.0859	0.610259	0.249413	0.203107	0.0825004		1.07477	1.27483	0.167058	-0.673358	-0.781206	-1.0621
Bradi1g65880	3	222.973	183.682	158.833	115.491	64.9426	76.6926		0.823785	0.712342	0.517958	0.291257	0.343954		1.38074	0.748968	0.349414	-0.3475	-1.16028	-0.971346
Bradi1g65890	3	30.2085	26.5103	18.6157	11.79	10.1299	13.0099		0.87758	0.616242	0.390288	0.335334	0.430671		1.42141	0.97711	0.0286331	-0.791424	-0.990869	-0.644863
Bradi1g66000	3	7.93639	6.19903	5.09009	1.28632	0.866825	0.89426		0.781089	0.641362	0.162079	0.109222	0.112678		1.36552	0.803905	0.445432	-0.784173	-0.919778	-0.910909
Bradi1g66700	3	104.45	75.3526	70.0951	24.5487	2.81391	0.36254		0.721424	0.671088	0.235029	0.0269403	0.00347095		1.35147	0.67556	0.553431	-0.504582	-1.00947	-1.06641
Bradi1g66720	3	11.3189	9.38147	6.6148	1.75246	1.36272	4.88349		0.828835	0.584406	0.154826	0.120394	0.431448		1.35143	0.869532	0.181369	-1.02806	-1.125	-0.249266
Bradi1g66930	3	109.823	121.328	94.2579	59.9624	37.7548	55.8863		1.10476	0.858273	0.545992	0.343779	0.508877		0.898602	1.24337	0.432187	-0.595514	-1.26099	-0.717657
Bradi1g67460	3	8.47366	6.30111	5.52242	2.79767	1.74648	1.16249		0.743612	0.651716	0.330161	0.206107	0.137188		1.43634	0.682536	0.412353	-0.533048	-0.897777	-1.10041
Bradi1g67720	3	9.85933	15.857	3.43654	0.240831	0.149112	0.0763058		1.60832	0.348557	0.0244267	0.015124	0.00773945		0.751892	1.66795	-0.229101	-0.717202	-0.731211	-0.742331
Bradi1g67760	3	97.04	89.7558	82.1134	43.8148	64.4129	62.3564		0.924936	0.846181	0.451513	0.663777	0.642585		1.1955	0.82947	0.445442	-1.47906	-0.444008	-0.547346
Bradi1g67830	3	11.7603	7.70949	3.10809	1.51085	1.1968	4.15269		0.655553	0.264287	0.12847	0.101766	0.353112		1.67292	0.684193	-0.438928	-0.828788	-0.905441	-0.183959
Bradi1g67840	3	7.77251	8.98884	6.16421	5.09868	3.67479	5.81042		1.15649	0.793079	0.655989	0.472793	0.747561		0.802113	1.44358	-0.0460741	-0.608015	-1.35895	-0.232656
Bradi1g68120	3	14.0546	18.293	16.1803	6.78518	5.7168	11.7377		1.30157	1.15125	0.482772	0.406755	0.835149		0.38088	1.21875	0.801106	-1.05619	-1.2674	-0.0771448
Bradi1g68210	3	36.6818	38.9418	23.1235	16.3676	18.5468	12.8404		1.06161	0.630381	0.446206	0.505613	0.350047		1.12305	1.32999	-0.11844	-0.737054	-0.537513	-1.06004
Bradi1g68460	3	134.738	119.217	91.7297	36.7678	22.3494	47.3498		0.884805	0.680801	0.272884	0.165873	0.351421		1.27757	0.943627	0.352232	-0.830297	-1.14051	-0.602621
Bradi1g68500	3	70.6729	60.2017	52.597	41.6941	37.4138	30.5673		0.851837	0.744232	0.589959	0.529394	0.432519		1.44767	0.752794	0.248137	-0.475392	-0.759435	-1.21377
Bradi1g68710	3	69.7682	75.151	59.0451	22.8089	8.06981	23.9408		1.07715	0.846303	0.326924	0.115666	0.343148		0.941943	1.13229	0.562757	-0.718606	-1.2398	-0.67858
Bradi1g69070	3	39.3089	21.8226	21.6346	10.9031	1.48603	0.903621		0.555156	0.550375	0.277371	0.037804	0.0229877		1.5901	0.396706	0.38388	-0.348517	-0.991211	-1.03096
Bradi1g69220	3	41.6362	32.8963	17.7507	8.97433	6.85319	8.30042		0.79009	0.426329	0.215542	0.164597	0.199356		1.52088	0.923051	-0.112941	-0.713266	-0.858357	-0.759363
Bradi1g69250	3	14.0074	11.6963	9.83009	2.81489	2.38834	7.28265		0.835009	0.701779	0.200957	0.170506	0.519915		1.26865	0.780324	0.386	-1.09629	-1.18642	-0.152266
Bradi1g69530	3	849.222	775.118	503.606	241.326	147.984	470.446		0.912739	0.593021	0.284173	0.174259	0.553973		1.25883	0.993267	0.0202683	-0.919649	-1.25415	-0.0985645
Bradi1g69550	3	43.9494	48.1891	37.5649	15.7432	13.2293	24.7057		1.09647	0.854729	0.358211	0.301011	0.56214		0.905238	1.19195	0.473471	-1.00225	-1.17226	-0.396146
Bradi1g70390	3	268.202	210.651	194.835	67.1808	58.1682	165.096		0.785422	0.726451	0.250486	0.216882	0.615565		1.2944	0.601523	0.411105	-1.12579	-1.23429	0.0530557
Bradi1g70440	3	33.9947	44.0985	21.8271	8.79521	5.56536	18.9399		1.29722	0.642073	0.258723	0.163713	0.557143		0.800138	1.48577	-0.0255405	-0.909865	-1.12904	-0.22146
Bradi1g70680	3	28.72	24.243	14.028	5.14689	5.46601	2.65245		0.844115	0.488439	0.179209	0.190321	0.0923556		1.4016	0.992643	0.05955	-0.751695	-0.722545	-0.979551
Bradi1g70740	3	62.6924	60.706	33.037	28.2482	40.758	36.8747		0.968316	0.52697	0.450584	0.650128	0.588184		1.30454	1.16796	-0.734498	-1.06376	-0.203615	-0.470628
Bradi1g70970	3	36.1431	38.3598	4.62851	1.01306	1.52671	0.650213		1.06133	0.128061	0.0280291	0.0422407	0.01799		1.22563	1.34679	-0.496951	-0.694571	-0.666495	-0.714405
Bradi1g71210	3	9.27709	7.69097	7.55429	5.93616	2.65011	4.68861		0.829028	0.814295	0.639872	0.285661	0.505397		1.24888	0.583608	0.52628	-0.152413	-1.53068	-0.67567
Bradi1g71360	3	58.2429	63.1613	43.9575	35.0216	27.1018	26.7916		1.08445	0.754727	0.601302	0.465325	0.459998		1.01699	1.33231	0.101167	-0.471707	-0.979436	-0.999324
Bradi1g71373	3	42.8695	43.8944	28.4855	15.0028	7.6767	13.3207		1.02391	0.664471	0.349965	0.179071	0.310726		1.12849	1.19398	0.209406	-0.652093	-1.12021	-0.759579
Bradi1g71465	3	11.7035	8.33665	6.41694	2.63642	2.78571	4.19605		0.712323	0.548294	0.225268	0.238024	0.358531		1.60245	0.654423	0.11387	-0.950647	-0.90861	-0.511486
Bradi1g71500	3	20.682	14.0174	12.5302	6.86665	2.94767	5.26203		0.67776	0.60585	0.332011	0.142524	0.254426		1.56039	0.550518	0.32516	-0.533028	-1.12687	-0.776173
Bradi1g71510	3	92.0319	106.593	93.1677	33.7862	23.5525	46.8389		1.15822	1.01234	0.367114	0.255917	0.508942		0.735243	1.14644	0.767316	-0.909534	-1.19852	-0.540945
Bradi1g71667	3	137.083	124.235	84.4377	24.6225	21.0079	33.3724		0.90628	0.615961	0.179618	0.15325	0.243447		1.27825	1.03052	0.263105	-0.890298	-0.959996	-0.721575
Bradi1g71840	3	37.5786	39.0573	28.4169	20.9686	13.8472	16.5628		1.03935	0.756197	0.557994	0.368485	0.44075		1.07541	1.2136	0.219159	-0.476946	-1.14251	-0.888714
Bradi1g71890	3	53.4495	52.4168	39.8214	19.6199	8.80811	33.9237		0.980678	0.745028	0.367074	0.164793	0.634687		1.0529	0.99499	0.28869	-0.844134	-1.45042	-0.0420303
Bradi1g71930	3	33.3237	41.4868	15.47	9.55373	13.7592	17.6626		1.24497	0.464236	0.286695	0.412895	0.530032		0.909495	1.55804	-0.508942	-0.97898	-0.644866	-0.334746
Bradi1g71948	3	330.326	230.304	79.3427	10.7408	21.8779	13.1737		0.697203	0.240196	0.0325159	0.0662314	0.0398811		1.60275	0.860684	-0.259307	-0.768269	-0.685642	-0.750219
Bradi1g71975	3	56.1343	35.8634	7.90856	2.2992	2.67916	1.72536		0.638886	0.140886	0.0409589	0.0477278	0.0307363		1.67572	0.790344	-0.430648	-0.67565	-0.659054	-0.700714
Bradi1g72762	3	19.2134	17.0813	10.949	2.12271	1.08139	2.92189		0.889031	0.569864	0.110481	0.056283	0.152076		1.2892	1.02282	0.256638	-0.846136	-0.97624	-0.746285
Bradi1g72790	3	282.886	219.407	218.645	178.886	75.0424	191.417		0.775601	0.77291	0.632362	0.265275	0.676657		1.28992	0.364743	0.353647	-0.225822	-1.73929	-0.0431952
Bradi1g72910	3	33.135	32.9092	19.8065	4.93895	2.2313	19.8702		0.993183	0.59775	0.149055	0.0673396	0.599674		1.08349	1.0664	0.0750025	-1.04992	-1.25479	0.0798278
Bradi1g72963	3	43.4063	26.7038	15.853	11.095	5.87678	6.07657		0.615206	0.365224	0.255608	0.13539	0.139993		1.7313	0.585513	-0.158845	-0.485245	-0.843213	-0.829507
Bradi1g73935	3	5.24322	5.02893	4.64389	1.14179	0.255602	1.09035		0.959131	0.885694	0.217765	0.048749	0.207955		1.01903	0.92582	0.758323	-0.765101	-1.1506	-0.787478
Bradi1g73990	3	6.10677	5.9323	3.15327	1.33434	0.617917	3.30418		0.97143	0.516357	0.218502	0.101186	0.541068		1.18765	1.11087	-0.112161	-0.912655	-1.22795	-0.0457477
Bradi1g74040	3	6.5962	6.50807	6.54416	4.30988	3.20028	5.64302		0.98664	0.992111	0.653388	0.48517	0.855496		0.797429	0.735198	0.760681	-0.817053	-1.6006	0.124344
Bradi1g74350	3	93.1196	89.1314	44.8408	30.9268	19.0176	29.7507		0.957171	0.48154	0.332119	0.204227	0.319489		1.30917	1.18482	-0.196128	-0.629957	-1.00128	-0.666629
Bradi1g75160	3	9.58715	11.9355	7.6761	4.91979	3.66965	3.90872		1.24495	0.800666	0.513165	0.382767	0.407704		0.78487	1.48366	0.216213	-0.603964	-0.975961	-0.904821
Bradi1g75220	3	306.989	377.437	358.992	132.176	190.571	269.025		1.22948	1.1694	0.430557	0.620774	0.876335		0.358862	1.09256	0.900456	-1.46176	-0.853599	-0.0365182
Bradi1g75340	3	51.7256	42.8073	42.4053	29.5449	25.7235	23.1949		0.827584	0.819813	0.571185	0.497306	0.448421		1.39243	0.607732	0.572364	-0.55919	-0.895426	-1.11791
Bradi1g75520	3	39.998	40.092	46.948	19.9236	19.9553	30.3555		1.00235	1.17376	0.498115	0.498907	0.758924		0.628343	0.636633	1.24174	-1.14341	-1.14061	-0.222699
Bradi1g75610	3	35.4814	31.4502	17.9045	9.06819	3.79958	4.74904		0.886385	0.504617	0.255576	0.107087	0.133846		1.34353	1.04927	0.0605156	-0.584488	-0.969068	-0.899763
Bradi1g75670	3	390.862	259.11	284.454	48.3296	33.6277	209.146		0.662919	0.727761	0.123649	0.0860346	0.53509		1.33486	0.392395	0.573691	-1.11538	-1.22055	0.034989
Bradi1g75730	3	13.1864	8.6253	6.90699	6.05122	3.57934	3.3405		0.654106	0.523796	0.458898	0.271441	0.253329		1.70541	0.45847	-0.0112908	-0.245247	-0.921024	-0.986318
Bradi1g76140	3	43.9896	37.0623	23.2786	16.191	12.6938	14.7889		0.842523	0.529185	0.368064	0.288565	0.336191		1.48923	0.955314	-0.107035	-0.653302	-0.922839	-0.761366
Bradi1g76190	3	70.4518	79.9088	44.5484	20.7043	20.2081	6.41959		1.13423	0.632325	0.293879	0.286835	0.0911203		1.01032	1.32798	0.140235	-0.660683	-0.677351	-1.1405
Bradi1g76330	3	2403.88	1914.93	1439.07	702.77	389.274	1282.91		0.796601	0.598646	0.292348	0.161936	0.533685		1.40502	0.749759	0.112035	-0.87472	-1.29485	-0.0972412
Bradi1g76870	3	33.7591	29.6335	16.7894	12.8522	6.8716	9.00063		0.877793	0.49733	0.380705	0.203548	0.266614		1.40579	1.0342	-0.122645	-0.477258	-1.01593	-0.824167
Bradi1g77450	3	146.266	181.53	62.618	10.9367	7.7001	8.71792		1.24109	0.42811	0.0747725	0.0526444	0.0596031		0.998854	1.45846	-0.0913664	-0.764949	-0.807133	-0.793867
Bradi1g77680	3	8.83702	7.97153	4.27574	1.27047	3.98042	1.80562		0.902061	0.483844	0.143767	0.450426	0.204324		1.32937	1.05192	-0.132842	-1.09625	-0.227513	-0.924694
Bradi1g77730	3	5.26864	5.60687	5.3474	0.852082	0.670892	0.760183		1.0642	1.01495	0.161727	0.127337	0.144285		0.857209	0.989947	0.888121	-0.876035	-0.947141	-0.9121
Bradi1g77867	3	75.9128	65.2002	48.1462	22.3352	4.03123	35.4309		0.858882	0.63423	0.294222	0.0531034	0.466732		1.27017	0.870789	0.234999	-0.727262	-1.40965	-0.239039
Bradi1g78050	3	182.973	177.098	78.0177	65.1721	72.221	14.4735		0.967893	0.426389	0.356184	0.394708	0.0791018		1.2592	1.17181	-0.302104	-0.493194	-0.388335	-1.24738
Bradi2g00220	3	25.4744	21.4556	19.5441	10.0514	4.50823	8.86919		0.84224	0.767205	0.394568	0.176971	0.34816		1.26441	0.780026	0.54964	-0.594493	-1.2626	-0.736983
Bradi2g00250	3	341.429	316.958	257.14	97.6242	89.071	182.474		0.928326	0.753129	0.285928	0.260877	0.534442		1.17356	0.947988	0.396594	-1.07382	-1.15266	-0.291672
Bradi2g00310	3	92.1737	82.9389	76.8871	46.2316	45.2414	34.1756		0.899811	0.834155	0.50157	0.490828	0.370774		1.22037	0.834841	0.582197	-0.697589	-0.738925	-1.20089
Bradi2g00881	3	30.7274	23.3303	23.216	5.22865	1.24385	4.51485		0.759269	0.755549	0.170163	0.0404801	0.146933		1.28372	0.690876	0.681716	-0.759913	-1.07928	-0.817122
Bradi2g01041	3	10.1869	8.80873	7.07802	3.55382	3.7813	2.21793		0.864716	0.694819	0.348863	0.371194	0.217725		1.32053	0.892237	0.354367	-0.740888	-0.670191	-1.15606
Bradi2g01420	3	11.029	14.4595	11.2394	4.93702	2.67975	6.57663		1.31105	1.01908	0.447641	0.242974	0.596305		0.569328	1.33763	0.616462	-0.79503	-1.30057	-0.427821
Bradi2g01520	3	59.2599	71.2173	46.703	36.132	21.1665	35.6052		1.20178	0.788106	0.609722	0.357182	0.600831		0.789363	1.45192	0.0935899	-0.492149	-1.32139	-0.521342
Bradi2g02176	3	6.05502	4.62181	3.33653	2.31654	1.68332	2.1768		0.763303	0.551036	0.382582	0.278005	0.359503		1.59873	0.746943	-0.0169208	-0.623122	-0.999453	-0.706173
Bradi2g02310	3	105.741	130.598	59.8428	22.4972	19.9818	19.7697		1.23507	0.565936	0.212757	0.188969	0.186963		0.950892	1.4647	0.00215593	-0.76979	-0.821785	-0.82617
Bradi2g03170	3	841.763	753.229	710.164	437.67	326.003	530.272		0.894823	0.843663	0.519944	0.387287	0.629954		1.2085	0.766221	0.551085	-0.81019	-1.36803	-0.347586
Bradi2g03624	3	7.45254	6.94055	6.13187	3.59321	4.13881	2.9808		0.931299	0.82279	0.482145	0.555356	0.399971		1.1971	0.924244	0.493274	-0.859675	-0.568901	-1.18605
Bradi2g03631	3	15.3738	13.6124	9.70095	5.30029	1.27514	1.78139		0.885426	0.631006	0.344762	0.0829426	0.115872		1.25624	0.962497	0.310226	-0.423634	-1.09487	-1.01045
Bradi2g03713	3	84.5044	91.6421	71.7189	35.105	15.6506	48.2693		1.08447	0.8487	0.415423	0.185204	0.571205		0.896179	1.13585	0.466865	-0.762561	-1.41581	-0.320529
Bradi2g04180	3	174.604	172.801	96.0651	74.7864	65.4897	90.1392		0.989671	0.550189	0.42832	0.375076	0.516249		1.27707	1.2401	-0.333139	-0.769397	-0.959999	-0.454634
Bradi2g04230	3	11.8904	10.4647	9.85775	6.89914	4.15123	5.21165		0.880098	0.829052	0.580228	0.349125	0.438307		1.22468	0.766565	0.571527	-0.379178	-1.26217	-0.921425
Bradi2g04310	3	27.9125	31.0194	19.5125	18.4645	6.57468	7.45507		1.11131	0.699059	0.661512	0.235546	0.267087		0.93248	1.23994	0.101209	-0.00250442	-1.17912	-1.092
Bradi2g04530	3	139.816	129.991	104.905	67.4318	39.2367	53.3692		0.929731	0.750307	0.482289	0.28063	0.38171		1.21337	0.978202	0.377719	-0.519263	-1.19416	-0.855874
Bradi2g04847	3	6.84142	6.98253	5.24603	2.63822	1.25857	1.48041		1.02063	0.766805	0.385625	0.183963	0.216389		1.05784	1.11179	0.447892	-0.549133	-1.07661	-0.991791
Bradi2g05070	3	44.4504	32.1354	23.8094	18.9714	15.2461	18.3897		0.722949	0.535639	0.426799	0.342991	0.413713		1.72369	0.603518	-0.153814	-0.593875	-0.93273	-0.646787
Bradi2g05163	3	104.282	118.848	28.7205	4.16517	4.44046	2.52478		1.13968	0.275411	0.0399413	0.0425811	0.0242111		1.12875	1.40073	-0.282128	-0.740621	-0.735481	-0.77125
Bradi2g05270	3	11.1696	9.88075	6.37735	6.36876	4.88258	4.86071		0.884611	0.570956	0.570186	0.437131	0.435173		1.47612	0.989914	-0.331694	-0.334936	-0.895574	-0.903824
Bradi2g05350	3	51.3977	49.6424	17.0634	7.01046	7.89036	2.94324		0.965849	0.331988	0.136396	0.153516	0.057264		1.30178	1.22228	-0.253406	-0.70876	-0.668904	-0.892986
Bradi2g05600	3	90.623	84.3754	81.9964	42.7148	25.6774	36.8856		0.93106	0.904808	0.471346	0.283343	0.407022		1.06584	0.845666	0.761826	-0.622496	-1.22291	-0.827922
Bradi2g05620	3	66.1697	81.7141	68.1728	41.856	26.6592	40.8738		1.23492	1.03027	0.632555	0.402891	0.617712		0.570764	1.31452	0.666605	-0.592589	-1.31972	-0.639583
Bradi2g05640	3	121.844	108.469	87.4573	43.9203	30.3814	38.6181		0.890226	0.717779	0.360462	0.249346	0.316946		1.27671	0.935607	0.399761	-0.710529	-1.0558	-0.845746
Bradi2g05650	3	8.36106	6.40914	6.94229	4.22821	3.88544	4.10049		0.766546	0.830312	0.505703	0.464707	0.490427		1.4622	0.40771	0.695737	-0.77049	-0.955666	-0.83949
Bradi2g05690	3	79.3667	66.9753	54.7789	30.0425	21.7504	38.9625		0.843872	0.6902	0.378529	0.27405	0.490918		1.37924	0.822915	0.275339	-0.835226	-1.20751	-0.434754
Bradi2g05770	3	48.2285	31.7461	36.1132	13.2029	11.5503	16.9803		0.658243	0.748793	0.273756	0.239492	0.35208		1.4899	0.369846	0.666608	-0.890251	-1.00255	-0.633556
Bradi2g05790	3	4.72077	5.33238	5.54536	0.787624	0.730028	3.57362		1.12956	1.17467	0.166842	0.154642	0.756999		0.580191	0.859059	0.956169	-1.21315	-1.23941	0.0571419
Bradi2g05927	3	26.9235	25.7201	21.9933	7.17448	3.85166	10.6622		0.955303	0.81688	0.266476	0.14306	0.396019		1.08296	0.963063	0.591739	-0.884733	-1.2158	-0.537231
Bradi2g06150	3	9.7055	8.61161	5.65417	6.94636	2.68134	3.96369		0.887292	0.582573	0.715714	0.27627	0.408396		1.27824	0.872365	-0.22495	0.2545	-1.32797	-0.852177
Bradi2g06271	3	13.4596	13.3214	8.0403	4.87507	4.96367	3.22219		0.989732	0.597366	0.362201	0.368783	0.239397		1.22559	1.19467	0.0134046	-0.694589	-0.674772	-1.0643
Bradi2g06520	3	453.857	454.187	341.147	149.658	38.1888	163.37		1.00073	0.751663	0.329748	0.0841428	0.359959		1.07211	1.074	0.426345	-0.670786	-1.30945	-0.592225
Bradi2g06590	3	17.0766	16.5719	15.2028	5.08186	1.34893	4.57762		0.970445	0.890272	0.297592	0.0789928	0.268064		1.00658	0.935024	0.740927	-0.693939	-1.22316	-0.765426
Bradi2g07000	3	19.7205	17.9685	16.8866	10.7271	7.5215	13.0848		0.911161	0.856301	0.543956	0.381406	0.663512		1.15325	0.779256	0.548304	-0.766604	-1.45091	-0.263296
Bradi2g07250	3	29.7584	26.7098	27.6308	8.88019	9.06709	10.0187		0.897558	0.928506	0.29841	0.304691	0.33667		1.07547	0.779591	0.868978	-0.950894	-0.932753	-0.84039
Bradi2g07510	3	40.3771	37.7766	32.6075	25.9805	19.7187	30.0896		0.935596	0.807575	0.643447	0.488364	0.745215		1.21991	0.878265	0.19915	-0.6715	-1.49417	-0.131653
Bradi2g07570	3	28.4056	24.0235	22.0576	14.3652	8.43674	12.2575		0.84573	0.776524	0.505717	0.29701	0.431516		1.31389	0.746517	0.491992	-0.503975	-1.27155	-0.776869
Bradi2g08826	3	37.5648	33.2822	25.9176	8.16686	6.39474	19.3125		0.885995	0.689945	0.217407	0.170232	0.514112		1.22812	0.895064	0.32232	-1.05816	-1.19598	-0.191363
Bradi2g08970	3	23.9757	22.8893	22.5826	15.5992	10.1257	18.0435		0.954687	0.941895	0.650623	0.422332	0.752575		0.952012	0.749464	0.692288	-0.609678	-1.63012	-0.153962
Bradi2g09427	3	18.5053	18.4662	16.7818	9.11883	7.62225	11.4374		0.997887	0.906865	0.49277	0.411896	0.61806		0.996928	0.988891	0.642661	-0.932478	-1.2401	-0.455897
Bradi2g09434	3	7.27752	8.86514	7.82644	4.06998	2.00571	3.61809		1.21815	1.07543	0.559253	0.275604	0.49716		0.607751	1.18655	0.807867	-0.561619	-1.31418	-0.726362
Bradi2g10420	3	8.31651	6.11861	7.25557	3.84434	4.87029	5.46062		0.735718	0.87243	0.462254	0.585617	0.6566		1.44122	0.0868541	0.787464	-1.31457	-0.682371	-0.318601
Bradi2g10960	3	27.6158	27.873	18.7776	7.76627	4.9862	3.2792		1.00931	0.679959	0.281226	0.180556	0.118744		1.12027	1.1432	0.332345	-0.649317	-0.897161	-1.04934
Bradi2g10970	3	86.4154	74.1093	66.0043	51.4405	27.2554	32.1827		0.857594	0.763802	0.59527	0.3154	0.372419		1.28293	0.759821	0.415291	-0.203787	-1.23185	-1.0224
Bradi2g11080	3	30.2064	38.2462	27.526	3.7311	1.61667	14.1024		1.26616	0.911265	0.12352	0.0535208	0.466869		0.730353	1.26571	0.551873	-1.03258	-1.17338	-0.341976
Bradi2g11220	3	288.796	215.788	172.094	126.409	61.2817	80.971		0.747199	0.595904	0.43771	0.212197	0.280375		1.52706	0.677564	0.169159	-0.362429	-1.12023	-0.891128
Bradi2g11676	3	25.6557	11.5903	15.7343	7.87964	3.34172	12.9413		0.451765	0.613288	0.307131	0.130253	0.504424		1.6834	-0.166629	0.378434	-0.654699	-1.25158	0.0110715
Bradi2g11860	3	28.8928	16.7889	8.60729	1.23813	0.122022	0.0756247		0.581075	0.297904	0.0428526	0.00422327	0.00261742		1.68766	0.645735	-0.0585498	-0.6929	-0.788976	-0.79297
Bradi2g11920	3	5.27629	5.53519	5.2909	1.9467	1.17781	4.14636		1.04907	1.00277	0.368953	0.223227	0.785847		0.732023	0.869284	0.73977	-1.03321	-1.44084	0.132973
Bradi2g11940	3	482.222	522.651	231.498	171.829	95.2003	77.1123		1.08384	0.480066	0.356329	0.19742	0.159911		1.12992	1.3387	-0.164842	-0.472976	-0.868697	-0.962105
Bradi2g12047	3	64.2037	58.2222	27.7396	28.1957	14.9182	27.2923		0.906836	0.432057	0.43916	0.232357	0.425089		1.39487	1.09083	-0.458606	-0.435424	-1.11032	-0.481347
Bradi2g12300	3	80.2035	76.084	48.9662	20.6636	11.0219	28.9334		0.948637	0.610524	0.25764	0.137424	0.360749		1.23495	1.09321	0.160138	-0.813696	-1.14545	-0.529152
Bradi2g12650	3	39.4272	42.6677	33.0132	26.5337	23.393	19.4247		1.08219	0.83732	0.672979	0.59332	0.492671		0.944566	1.29703	0.246908	-0.457875	-0.799498	-1.23113
Bradi2g12850	3	179.898	177.841	137.741	65.6082	38.8509	73.4219		0.988565	0.76566	0.364696	0.215961	0.40813		1.10955	1.07582	0.418333	-0.764368	-1.20309	-0.636254
Bradi2g13190	3	4.99018	6.29218	4.82359	1.55952	0.843658	1.18834		1.26091	0.966617	0.312518	0.169064	0.238136		0.725984	1.27964	0.655147	-0.732841	-1.03725	-0.890679
Bradi2g13600	3	135.036	109.405	58.6317	23.2016	27.2882	22.0458		0.810193	0.434192	0.171818	0.202081	0.163258		1.48494	0.959495	-0.0813819	-0.807711	-0.723933	-0.831406
Bradi2g14790	3	65.1314	40.8109	34.0899	30.8442	10.8012	19.5875		0.626592	0.523401	0.473569	0.165836	0.300739		1.67876	0.3862	0.029002	-0.143495	-1.20872	-0.741749
Bradi2g14860	3	10.0044	11.392	7.87542	2.47679	2.1131	2.05963		1.1387	0.787197	0.24757	0.211217	0.205873		0.938259	1.26232	0.441055	-0.819757	-0.904694	-0.917181
Bradi2g14960	3	79.3816	66.3836	49.7232	17.7568	22.0751	49.0893		0.836259	0.626382	0.22369	0.278088	0.618396		1.32527	0.786624	0.0962098	-1.22849	-1.04954	0.0699379
Bradi2g14970	3	35.5906	36.9275	24.6405	1.14183	0.468512	2.61363		1.03756	0.692332	0.0320823	0.0131639	0.0734361		1.06767	1.14403	0.442261	-0.899855	-0.938311	-0.815793
Bradi2g15307	3	99.2007	87.3376	56.4066	37.3814	25.4325	51.4493		0.880414	0.568611	0.376826	0.256374	0.518638		1.38939	0.973861	-0.109568	-0.775968	-1.19451	-0.283209
Bradi2g15317	3	75.7709	72.9331	61.74	39.5609	25.4057	35.2312		0.962548	0.814825	0.522112	0.335296	0.46497		1.13351	0.999469	0.470765	-0.57687	-1.24549	-0.781384
Bradi2g15410	3	427.075	347.376	241.154	113.081	96.0671	112.979		0.813384	0.564663	0.264781	0.224942	0.264541		1.4599	0.889881	0.130158	-0.785841	-0.90753	-0.786572
Bradi2g15500	3	16.646	10.296	5.24791	3.82725	1.93203	0.709273		0.618528	0.315266	0.22992	0.116065	0.0426092		1.6984	0.64137	-0.198951	-0.435437	-0.750922	-0.954464
Bradi2g15650	3	49.5767	41.9077	24.6943	9.49017	7.76034	4.94346		0.845309	0.498103	0.191424	0.156532	0.0997133		1.39455	0.991192	0.0858472	-0.713825	-0.804806	-0.952961
Bradi2g16560	3	379.512	358.655	254.136	69.5197	23.1388	51.4454		0.945043	0.66964	0.183182	0.0609698	0.135557		1.1789	1.04956	0.401429	-0.743399	-1.03101	-0.855479
Bradi2g16570	3	31.9936	33.105	16.9207	2.39634	0.225432	1.04134		1.03474	0.528879	0.0749005	0.00704615	0.0325483		1.14859	1.22066	0.171209	-0.770608	-0.911378	-0.858472
Bradi2g16810	3	2376.54	1846.38	1495.43	1459.42	971.534	998.525		0.776923	0.629248	0.614097	0.408803	0.42016		1.6002	0.604368	-0.0548646	-0.122501	-1.03895	-0.988253
Bradi2g16887	3	134.272	106.724	66.1487	34.2672	17.4797	80.1465		0.794833	0.492646	0.255207	0.130181	0.596895		1.39642	0.766805	-0.160541	-0.889191	-1.27287	0.159377
Bradi2g17067	3	45.3075	35.4938	24.3773	13.638	5.77323	6.92913		0.783398	0.53804	0.301009	0.127423	0.152936		1.45532	0.844655	0.152916	-0.515347	-1.00474	-0.93281
Bradi2g17310	3	19.1159	18.7209	11.3576	1.83349	1.60212	0.588275		0.979337	0.594142	0.0959146	0.0838107	0.0307741		1.17667	1.13131	0.285704	-0.808037	-0.834608	-0.951037
Bradi2g17380	3	8.77582	9.1407	4.69998	2.55721	3.22188	3.08675		1.04158	0.53556	0.291393	0.367132	0.351734		1.19069	1.31381	-0.184597	-0.90762	-0.683344	-0.728939
Bradi2g17507	3	68.9097	88.2028	60.7637	40.2513	27.7927	44.3053		1.27998	0.881787	0.584116	0.403321	0.642947		0.633008	1.51338	0.261292	-0.674723	-1.24323	-0.489732
Bradi2g18095	3	5.56973	7.21452	5.7935	1.65685	1.4807	3.04729		1.29531	1.04018	0.297474	0.265848	0.547116		0.602543	1.28953	0.696005	-1.03175	-1.10532	-0.451004
Bradi2g18237	3	70.7178	90.3025	37.03	27.5434	23.5973	25.2904		1.27694	0.523631	0.389483	0.333682	0.357624		0.891231	1.59022	-0.311111	-0.649697	-0.790537	-0.730107
Bradi2g18997	3	29.2758	28.7176	24.5823	6.71029	2.16853	1.63906		0.980932	0.83968	0.22921	0.0740725	0.0559869		1.02902	0.987272	0.678028	-0.658479	-0.998122	-1.03772
Bradi2g19450	3	28.381	26.4575	21.8543	7.75045	5.43465	5.49697		0.932224	0.770032	0.273086	0.191489	0.193685		1.15244	0.974883	0.549994	-0.75185	-0.965608	-0.959855
Bradi2g19805	3	7.07651	6.93923	6.11183	2.41315	1.6361	5.22852		0.980601	0.863679	0.341009	0.231202	0.738855		0.930916	0.872178	0.518143	-1.06447	-1.39696	0.140187
Bradi2g20110	3	73.1375	48.9564	26.566	15.0035	8.16672	31.2902		0.669375	0.363233	0.205141	0.111663	0.427827		1.64655	0.633024	-0.305443	-0.79007	-1.07662	-0.107431
Bradi2g20141	3	22.5476	20.2882	9.33884	6.11168	8.32203	7.85433		0.899791	0.414183	0.271056	0.369087	0.348344		1.42961	1.11096	-0.433176	-0.888291	-0.576573	-0.642531
Bradi2g20380	3	114.585	91.894	62.263	19.8088	5.12993	17.6021		0.801974	0.543379	0.172875	0.0447698	0.153617		1.40002	0.893394	0.231815	-0.716073	-1.04381	-0.765342
Bradi2g20570	3	80.3378	72.7522	58.2093	29.43	16.5019	24.1093		0.905579	0.724556	0.366328	0.205407	0.300099		1.23576	0.955503	0.418198	-0.645081	-1.12272	-0.841658
Bradi2g20767	3	23.5845	19.5702	16.8419	10.4352	13.1073	12.535		0.829791	0.714106	0.44246	0.555759	0.531492		1.53093	0.719328	0.167707	-1.12758	-0.587336	-0.703049
Bradi2g21030	3	11.461	16.0816	11.0808	5.16131	3.47589	6.85904		1.40317	0.966832	0.450338	0.303281	0.59847		0.519558	1.50304	0.438649	-0.821289	-1.18002	-0.459937
Bradi2g21150	3	27.0233	14.8647	8.50846	2.65371	1.37383	1.22489		0.550071	0.314856	0.0982006	0.0508387	0.045327		1.74389	0.549241	-0.0752993	-0.650563	-0.776318	-0.790953
Bradi2g21190	3	22.3049	19.8111	9.43297	7.92583	8.38795	4.86575		0.888199	0.422911	0.355341	0.376059	0.218147		1.42807	1.07837	-0.377014	-0.588367	-0.523562	-1.0175
Bradi2g21951	3	9.55357	5.53201	5.0029	1.9455	1.97131	5.08027		0.579051	0.523668	0.203641	0.206343	0.531767		1.67669	0.243849	0.0553345	-1.03398	-1.02479	0.0829009
Bradi2g24010	3	24.0306	21.6836	19.0313	10.9215	6.42791	14.164		0.902331	0.79196	0.454485	0.267489	0.589416		1.18608	0.837558	0.443714	-0.76052	-1.42779	-0.279037
Bradi2g24210	3	269.201	223.074	200.884	138.042	75.2879	195.803		0.82865	0.746223	0.512782	0.279671	0.727348		1.25659	0.578546	0.252373	-0.671376	-1.59382	0.177683
Bradi2g24680	3	12.3895	13.9719	8.49804	1.94607	0.491318	3.75671		1.12772	0.685905	0.157073	0.0396558	0.303216		0.986276	1.26761	0.294389	-0.870516	-1.12916	-0.548594
Bradi2g24737	3	54.4443	58.8432	45.3471	10.1181	2.74833	5.14732		1.08079	0.832907	0.185842	0.0504796	0.0945428		0.956192	1.12442	0.608283	-0.738984	-1.02083	-0.929081
Bradi2g25190	3	79.8455	84.8313	62.1878	21.8364	11.2184	28.4171		1.06244	0.778852	0.273483	0.140501	0.355901		1.00599	1.16377	0.447203	-0.829733	-1.16574	-0.621482
Bradi2g25310	3	22.8849	21.1534	17.6409	6.38442	3.64722	3.83768		0.924336	0.770851	0.278979	0.159372	0.167694		1.15097	0.957359	0.564606	-0.694038	-1.0001	-0.978803
Bradi2g25570	3	91.2335	73.6073	45.4327	46.4843	31.3741	33.6897		0.806801	0.497983	0.509509	0.343888	0.369269		1.58189	0.840262	-0.345197	-0.300949	-0.936719	-0.839289
Bradi2g26230	3	13.1455	12.9539	11.0237	6.7222	6.3049	10.5107		0.985425	0.838591	0.511367	0.479623	0.799561		1.02028	0.955885	0.30708	-1.1388	-1.27907	0.134618
Bradi2g26607	3	26.8894	31.2028	28.7201	14.7599	11.8369	19.2381		1.16041	1.06808	0.548911	0.440206	0.715452		0.600498	1.14219	0.830397	-0.922795	-1.28989	-0.360402
Bradi2g27180	3	11.1638	15.4401	9.34073	3.24793	3.82397	6.72512		1.38305	0.836696	0.290933	0.342532	0.602402		0.617419	1.53624	0.225702	-1.08342	-0.959648	-0.336297
Bradi2g30400	3	275.718	309.906	240.664	131.476	43.3225	195.487		1.12399	0.872863	0.476851	0.157126	0.709011		0.772785	1.1191	0.417701	-0.688339	-1.58131	-0.0399305
Bradi2g30567	3	123.439	115.542	90.898	63.3685	54.7296	70.2649		0.936029	0.736381	0.51336	0.443374	0.569229		1.30472	1.02676	0.159259	-0.809802	-1.1139	-0.567043
Bradi2g31900	3	25.5989	27.2363	20.2818	9.08819	12.921	15.9508		1.06396	0.792291	0.355022	0.504749	0.623105		0.990124	1.21891	0.247173	-1.31689	-0.781331	-0.357985
Bradi2g32600	3	102.458	85.9951	77.1653	59.7984	40.0992	43.7508		0.839319	0.753139	0.583637	0.391371	0.427011		1.3915	0.722582	0.363817	-0.34182	-1.14222	-0.993852
Bradi2g32950	3	15.6059	10.6567	12.1467	4.88889	5.88151	9.33747		0.68286	0.778339	0.313271	0.376876	0.598328		1.46672	0.226485	0.599874	-1.21886	-0.97012	-0.104095
Bradi2g33100	3	26.4378	30.8876	23.6768	9.05535	6.15547	9.88422		1.16831	0.895566	0.342515	0.232828	0.373867		0.830925	1.25325	0.56888	-0.818833	-1.09406	-0.740166
Bradi2g33460	3	20.4514	14.1914	13.2755	7.78425	6.65648	6.4848		0.693909	0.649123	0.380621	0.325478	0.317083		1.62323	0.491345	0.325735	-0.667146	-0.871059	-0.902101
Bradi2g33500	3	563.374	453.02	359.423	210.75	75.4221	184.782		0.804119	0.637982	0.374085	0.133876	0.327992		1.39586	0.793154	0.281968	-0.530021	-1.26912	-0.671843
Bradi2g33540	3	13.7605	11.4019	7.19886	5.72286	5.17411	1.40903		0.828595	0.523155	0.415891	0.376013	0.102397		1.41117	0.884187	-0.0548907	-0.384674	-0.507281	-1.34851
Bradi2g34090	3	15.062	10.6635	9.20267	4.8419	2.23782	4.60499		0.707973	0.610987	0.321465	0.148574	0.305736		1.53553	0.609455	0.301892	-0.616242	-1.16452	-0.666121
Bradi2g34240	3	469.259	439.651	320.679	135.55	80.1579	126.831		0.936905	0.683375	0.288859	0.170818	0.270279		1.21574	1.04205	0.344113	-0.741935	-1.06689	-0.793084
Bradi2g34300	3	116.998	110.992	69.15	86.2187	49.7043	48.1547		0.948667	0.591035	0.736923	0.424829	0.411585		1.23791	1.03585	-0.371859	0.202386	-1.02608	-1.07821
Bradi2g34310	3	273.675	252.432	219.217	182.532	134.004	165.339		0.922377	0.801011	0.666964	0.489645	0.604144		1.29356	0.896121	0.274715	-0.41162	-1.31951	-0.733264
Bradi2g34790	3	29.2315	32.8714	27.6389	11.4834	7.58957	16.6202		1.12452	0.945516	0.392843	0.259636	0.56857		0.799442	1.14895	0.646515	-0.90475	-1.27864	-0.411512
Bradi2g35760	3	108.132	91.4999	84.3279	59.3389	45.9509	53.9587		0.846188	0.779862	0.548764	0.424953	0.499008		1.40323	0.722092	0.428371	-0.595023	-1.14331	-0.815362
Bradi2g35860	3	809.386	968.168	550.391	430.556	246.797	314.086		1.19618	0.68001	0.531954	0.304919	0.388055		0.901222	1.45986	-0.00999142	-0.431602	-1.07811	-0.841373
Bradi2g36480	3	375.872	342.15	236.902	206.667	99.1249	257.9		0.910283	0.630275	0.549835	0.26372	0.686139		1.23823	0.898114	-0.163393	-0.46834	-1.553	0.0483862
Bradi2g36950	3	106.806	115.938	105.406	70.505	49.2464	89.8566		1.0855	0.986891	0.660121	0.461082	0.841306		0.675646	1.0348	0.62058	-0.752009	-1.58807	0.00905223
Bradi2g37180	3	34.8884	26.9959	25.2754	13.9265	13.3363	23.0727		0.773777	0.724465	0.399174	0.382256	0.661327		1.45584	0.496119	0.286917	-1.09308	-1.16485	0.0190643
Bradi2g37310	3	118.203	91.4781	73.3139	38.3453	42.8205	50.791		0.773905	0.620236	0.324402	0.362262	0.429692		1.56646	0.712871	0.132717	-0.984164	-0.841227	-0.586656
Bradi2g37340	3	61.0282	44.3093	32.7338	14.4254	3.67043	5.44625		0.726047	0.536371	0.236374	0.0601433	0.0892416		1.47884	0.753627	0.25151	-0.542655	-1.00918	-0.932147
Bradi2g37690	3	392.835	366.425	280.047	213.621	241.213	181.477		0.932771	0.712886	0.543792	0.614031	0.461967		1.34183	1.02978	0.00918285	-0.775671	-0.449659	-1.15546
Bradi2g38750	3	258.884	227.18	188.672	108.214	35.3074	71.0401		0.877538	0.72879	0.418002	0.136383	0.274409		1.23079	0.878202	0.44993	-0.444887	-1.25572	-0.858318
Bradi2g39230	3	18.407	20.1483	13.6631	8.2024	6.5893	9.43323		1.0946	0.742277	0.445613	0.357978	0.512481		1.01056	1.3211	0.164526	-0.809339	-1.09702	-0.589831
Bradi2g39930	3	135.993	100.9	100.905	86.8708	64.6168	74.6487		0.741947	0.741986	0.638787	0.475147	0.548914		1.67418	0.275445	0.275654	-0.283717	-1.1707	-0.77086
Bradi2g40480	3	73.6907	82.6576	65.9967	40.0185	40.1884	30.5212		1.12168	0.89559	0.54306	0.545365	0.41418		0.851909	1.27213	0.491341	-0.726087	-0.718127	-1.17116
Bradi2g40537	3	37.2281	27.1589	20.0466	12.1844	13.0224	15.1497		0.729528	0.538481	0.327292	0.349801	0.406943		1.68118	0.650848	-0.076923	-0.881426	-0.795678	-0.578004
Bradi2g40870	3	553.118	688.696	498.207	260.067	229.879	313.358		1.24512	0.900725	0.470184	0.415606	0.566529		0.702836	1.4402	0.404197	-0.890958	-1.05514	-0.601131
Bradi2g41117	3	8.93424	9.96009	8.74715	4.33818	3.57287	4.77071		1.11482	0.979059	0.485568	0.399907	0.53398		0.793777	1.16162	0.72669	-0.854252	-1.12867	-0.699161
Bradi2g41288	3	461.366	341.405	234.2	116.796	90.1725	142.515		0.739988	0.507624	0.253154	0.195447	0.308899		1.58184	0.757844	0.0214612	-0.784978	-0.967856	-0.608316
Bradi2g41490	3	379.465	405.088	360.621	84.758	63.064	28.3275		1.06752	0.950341	0.223362	0.166192	0.0746512		0.892667	1.0363	0.787035	-0.759354	-0.880963	-1.07568
Bradi2g41970	3	6.67913	5.14831	4.60393	2.75112	1.76496	3.18762		0.770805	0.689301	0.411897	0.264249	0.47725		1.48171	0.627908	0.324284	-0.709112	-1.25914	-0.465656
Bradi2g42023	3	12.8261	14.2926	10.1506	2.68819	1.15606	0.907565		1.11434	0.791399	0.209587	0.0901328	0.0707591		0.952318	1.19217	0.514719	-0.705797	-0.956385	-0.997027
Bradi2g42260	3	17.9571	9.94346	5.96336	2.28375	1.12342	1.4839		0.553736	0.33209	0.127178	0.0625617	0.0826361		1.75241	0.531049	-0.0755655	-0.636382	-0.813228	-0.758287
Bradi2g42720	3	59.1736	61.8312	51.7293	15.131	12.1946	32.5735		1.04491	0.874195	0.255705	0.206081	0.550473		0.92743	1.04824	0.589017	-1.07471	-1.20819	-0.281788
Bradi2g43330	3	75.0844	62.8356	42.8752	5.62878	9.83031	28.3051		0.836866	0.571026	0.074966	0.130923	0.376977		1.33993	0.904096	0.19387	-1.13142	-0.981921	-0.324557
Bradi2g43590	3	9.64705	10.7671	5.17326	0.72393	0.224537	0.346279		1.1161	0.536253	0.0750415	0.0232752	0.0358948		1.07262	1.30515	0.143849	-0.779848	-0.883524	-0.85825
Bradi2g44040	3	22.3633	20.4225	15.9393	11.9621	7.66443	9.29073		0.913215	0.712742	0.534897	0.342723	0.415445		1.29554	0.971367	0.222524	-0.441796	-1.15964	-0.887998
Bradi2g44410	3	11.0213	7.50382	4.05804	0.627446	0.302508	0.181651		0.680846	0.3682	0.0569302	0.0274476	0.0164818		1.57207	0.79017	0.0242102	-0.738375	-0.810605	-0.837471
Bradi2g44840	3	29.9417	17.7241	18.6018	10.0673	7.41594	4.44017		0.591953	0.621269	0.33623	0.24768	0.148294		1.6315	0.323832	0.41778	-0.495686	-0.779463	-1.09796
Bradi2g44856	3	5798.61	6034.48	4377.87	2978.74	950.299	2394.2		1.04068	0.754987	0.513699	0.163884	0.412892		1.01939	1.13709	0.310458	-0.387696	-1.39987	-0.679375
Bradi2g45100	3	319.858	290.351	246.365	222.323	146.4	258.725		0.90775	0.770233	0.695069	0.457703	0.808877		1.20687	0.715822	-0.016177	-0.416271	-1.67976	0.189523
Bradi2g45320	3	19.425	18.4933	14.468	7.71833	2.42601	3.47476		0.952032	0.744814	0.397339	0.124891	0.178881		1.12558	1.00108	0.463258	-0.438598	-1.14573	-1.0056
Bradi2g45350	3	22.0788	21.9933	13.0281	3.3122	4.88238	13.8296		0.996127	0.590072	0.150017	0.221134	0.626372		1.10534	1.09471	-0.019803	-1.22764	-1.03245	0.0798318
Bradi2g45390	3	33.3977	31.793	23.7485	18.0633	12.6417	25.3271		0.951953	0.711081	0.540854	0.378519	0.758349		1.16366	0.961479	-0.0520876	-0.768386	-1.45147	0.146811
Bradi2g45450	3	242.004	294.914	205.309	80.6136	50.9405	87.2922		1.21863	0.84837	0.333109	0.210494	0.360706		0.814499	1.34117	0.449232	-0.792004	-1.08737	-0.725524
Bradi2g45480	3	5.13315	4.99521	6.48107	2.54127	2.43504	4.11653		0.973127	1.26259	0.495069	0.474375	0.801949		0.536422	0.449311	1.38764	-1.10036	-1.16744	-0.105576
Bradi2g45970	3	171.997	114.324	66.396	47.8654	15.429	40.7644		0.664689	0.38603	0.278292	0.0897052	0.237007		1.66994	0.66533	-0.169548	-0.492337	-1.05735	-0.616031
Bradi2g46120	3	33.1238	26.3632	13.6784	1.28695	0.0738419	0.498286		0.795898	0.412948	0.0388529	0.00222927	0.0150432		1.42759	0.959526	0.0813043	-0.776611	-0.8606	-0.831214
Bradi2g46240	3	171.36	172.558	73.0253	43.6234	43.9251	34.3358		1.00699	0.426151	0.254571	0.256332	0.200372		1.25558	1.27402	-0.258324	-0.710979	-0.706334	-0.853965
Bradi2g46410	3	44.462	37.9901	33.874	22.1445	19.7602	23.7137		0.85444	0.761864	0.498054	0.444429	0.533347		1.42314	0.771676	0.357341	-0.82337	-1.06338	-0.665415
Bradi2g46427	3	8.13865	11.9023	1.99834	1.51128	2.26416	2.03287		1.46244	0.245537	0.185692	0.278199	0.24978		0.805799	1.67294	-0.60893	-0.721147	-0.547684	-0.600973
Bradi2g46432	3	28.3264	19.263	18.3615	9.00728	7.40365	13.8933		0.680035	0.648211	0.317981	0.261369	0.49047		1.59818	0.418993	0.301709	-0.915309	-1.12395	-0.279624
Bradi2g46630	3	11.6695	10.8495	9.60531	7.80031	5.08648	5.7494		0.929736	0.823113	0.668437	0.435879	0.492687		1.18809	0.88455	0.423949	-0.244242	-1.24887	-1.00347
Bradi2g46957	3	123.962	117.731	107.062	61.409	65.9055	64.7371		0.949737	0.863666	0.495386	0.53166	0.522234		1.16033	0.946605	0.580625	-0.985317	-0.831079	-0.871158
Bradi2g47191	3	11.5498	10.6862	5.35088	3.13564	3.12236	5.58307		0.925226	0.463288	0.271489	0.270339	0.483391		1.35115	1.11676	-0.331224	-0.932434	-0.93604	-0.268209
Bradi2g47240	3	103.335	96.2512	84.3407	60.4641	49.7997	58.019		0.931452	0.81619	0.58513	0.481926	0.561467		1.25684	0.938508	0.403233	-0.669807	-1.14908	-0.779694
Bradi2g47280	3	12.6818	10.5588	8.943	3.00826	1.03598	1.89598		0.832599	0.705185	0.237211	0.0816903	0.149504		1.27181	0.845129	0.520365	-0.67245	-1.06886	-0.896004
Bradi2g47310	3	80.8449	62.8382	36.6327	12.0722	4.13772	44.7483		0.777268	0.453123	0.149325	0.0511809	0.553508		1.38724	0.772472	-0.122213	-0.960737	-1.23163	0.154862
Bradi2g47480	3	15.0778	6.74552	10.7005	2.37976	0.959675	1.01745		0.447381	0.709688	0.157832	0.0636482	0.0674804		1.53953	0.10321	0.784977	-0.649363	-0.894158	-0.884198
Bradi2g47530	3	172.136	134.181	113.106	82.2386	56.2507	108.645		0.779505	0.657071	0.477753	0.32678	0.631156		1.51573	0.57329	0.0499802	-0.716463	-1.36176	-0.0607853
Bradi2g47540	3	105.039	69.5486	64.1729	32.9815	6.00916	23.9394		0.662119	0.610941	0.313992	0.0572086	0.227909		1.51685	0.533713	0.3848	-0.47924	-1.22641	-0.729718
Bradi2g47730	3	9.28294	10.6065	7.36443	2.57322	4.10063	2.48006		1.14258	0.79333	0.277199	0.441739	0.267163		0.916159	1.29333	0.369449	-0.995884	-0.560623	-1.02243
Bradi2g48030	3	43.4262	41.9449	31.2785	13.6492	4.57771	22.2953		0.965888	0.720268	0.314307	0.105413	0.513406		1.10731	1.01212	0.326664	-0.806253	-1.38921	-0.250626
Bradi2g48140	3	17.5636	18.0203	9.90131	10.0834	7.18571	12.7262		1.026	0.563739	0.574108	0.409124	0.724579		1.13168	1.23538	-0.60831	-0.566955	-1.22498	0.0331861
Bradi2g48210	3	23.372	19.3551	16.6491	7.78208	6.11098	7.92373		0.828133	0.712351	0.332966	0.261466	0.339027		1.36445	0.807442	0.432207	-0.797338	-1.02906	-0.777695
Bradi2g48250	3	24.7836	24.9573	13.5204	8.56854	8.69493	16.118		1.00701	0.54554	0.345735	0.350835	0.65035		1.17621	1.19977	-0.350664	-1.02196	-1.00483	0.00147253
Bradi2g48450	3	150.708	133.703	74.1508	14.6603	2.26629	57.8523		0.887167	0.492016	0.0972758	0.0150376	0.38387		1.29528	1.01464	0.0318079	-0.950003	-1.15455	-0.237177
Bradi2g49090	3	6.38427	5.00447	3.54531	1.78465	1.14516	2.38668		0.783875	0.55532	0.279539	0.179373	0.373838		1.49645	0.810285	0.0846496	-0.790921	-1.10894	-0.491532
Bradi2g50526	3	169.09	189.723	136.339	68.7444	31.6828	123.404		1.12203	0.806314	0.406556	0.187373	0.729816		0.821521	1.16563	0.275326	-0.851992	-1.47009	0.0596015
Bradi2g50620	3	111.996	74.478	49.9465	18.107	5.80083	14.6865		0.665007	0.445968	0.161676	0.0517951	0.131135		1.59932	0.692383	0.0993719	-0.670302	-0.967786	-0.752987
Bradi2g50967	3	10.5889	9.70363	6.91259	6.30417	5.02427	8.21763		0.916393	0.652812	0.595355	0.474483	0.776058		1.32428	0.905128	-0.4163	-0.704356	-1.31033	0.201579
Bradi2g52227	3	18.16	25.1842	12.9054	2.78117	3.40083	4.02918		1.38679	0.710651	0.153148	0.18727	0.221871		0.763853	1.52134	0.197199	-0.894602	-0.827778	-0.760016
Bradi2g52510	3	45.3175	39.5598	20.8431	1.9788	0.689057	3.95208		0.872946	0.459934	0.0436652	0.0152051	0.0872087		1.33989	1.0498	0.106796	-0.843643	-0.908624	-0.744223
Bradi2g52530	3	19.3489	17.1587	15.8938	3.30106	0.753952	1.67257		0.886801	0.821428	0.170607	0.0389661	0.0864423		1.11925	0.865494	0.718949	-0.739976	-1.03507	-0.928645
Bradi2g52940	3	289.843	249.662	215.635	107.813	70.5002	122.271		0.861369	0.743972	0.371969	0.243236	0.42185		1.29581	0.838633	0.451484	-0.775295	-1.19983	-0.610799
Bradi2g53267	3	143.055	141.003	138.272	89.8814	66.887	79.5998		0.985659	0.966566	0.628301	0.467563	0.55643		0.957247	0.898224	0.819642	-0.572581	-1.23414	-0.868387
Bradi2g53320	3	10.5037	11.6175	11.5384	2.44594	0.492436	3.37067		1.10604	1.09851	0.232865	0.0468821	0.320903		0.754209	0.972835	0.957311	-0.827471	-1.21093	-0.645954
Bradi2g53440	3	27.9689	19.5399	14.1917	5.3381	6.26605	5.18535		0.698628	0.50741	0.190858	0.224036	0.185397		1.59914	0.69372	0.119236	-0.831788	-0.73211	-0.848196
Bradi2g53520	3	50.44	26.7786	21.3631	7.68512	4.57178	7.40407		0.530899	0.423535	0.152361	0.0906378	0.146789		1.76136	0.405278	0.0949088	-0.689003	-0.867434	-0.705111
Bradi2g53720	3	42.6599	41.9514	30.2155	18.4773	16.4776	31.6025		0.983392	0.708288	0.43313	0.386254	0.740801		1.11525	1.05168	-0.00136373	-1.05461	-1.23404	0.123088
Bradi2g53730	3	175.326	133.617	142.432	55.5259	59.3995	114.374		0.762109	0.812383	0.316701	0.338795	0.652349		1.29863	0.423328	0.608305	-1.21552	-1.13422	0.019476
Bradi2g53750	3	139.362	106.314	94.9789	21.1968	33.8592	63.4206		0.762861	0.681526	0.152099	0.242958	0.455078		1.38928	0.658646	0.408051	-1.22314	-0.943195	-0.289646
Bradi2g53760	3	139.152	92.4335	101.714	22.4196	17.1506	7.32409		0.66426	0.730952	0.161115	0.12325	0.0526335		1.38311	0.530487	0.699852	-0.747265	-0.843424	-1.02276
Bradi2g53780	3	84.9791	87.0578	63.6188	41.669	30.7614	61.431		1.02446	0.74864	0.490344	0.361988	0.722895		1.03646	1.12856	0.0900567	-0.882458	-1.36573	-0.00687608
Bradi2g54300	3	7.11397	8.82835	2.96834	0.434349	0.10341	0.270427		1.24099	0.417255	0.0610559	0.0145362	0.0380136		1.00289	1.4521	-0.0833593	-0.747324	-0.834038	-0.790276
Bradi2g54340	3	386.777	459.195	323.15	131.063	148.871	50.0239		1.18724	0.835496	0.338859	0.384902	0.129335		0.842157	1.28755	0.450837	-0.730552	-0.621027	-1.22896
Bradi2g54410	3	412.405	312.369	135.181	126.857	101.678	132.42		0.757433	0.327788	0.307602	0.24655	0.321092		1.63683	0.85308	-0.535142	-0.600364	-0.797629	-0.556779
Bradi2g54670	3	101.309	118.28	48.3521	39.3642	28.8706	21.9004		1.16752	0.477275	0.388558	0.284977	0.216175		1.03529	1.45734	-0.281697	-0.505217	-0.766183	-0.939528
Bradi2g54680	3	21.9119	17.1265	16.2827	10.6485	5.36472	7.67801		0.781609	0.7431	0.485968	0.244831	0.350404		1.38517	0.62703	0.493347	-0.39928	-1.23638	-0.869886
Bradi2g54690	3	9.52571	7.11815	5.15789	2.52399	1.23634	1.75546		0.747257	0.541471	0.264967	0.12979	0.184287		1.5046	0.776151	0.183043	-0.613887	-1.00349	-0.846419
Bradi2g54810	3	38.1599	20.7147	20.5134	4.74385	7.1914	8.70867		0.54284	0.537563	0.124315	0.188454	0.228215		1.71121	0.321947	0.305912	-0.94991	-0.754996	-0.634167
Bradi2g54890	3	96.8705	86.3508	64.56	23.3613	14.1005	30.442		0.891405	0.666457	0.24116	0.145561	0.314255		1.27017	0.968251	0.342849	-0.839566	-1.10535	-0.636348
Bradi2g55010	3	17.2825	11.1515	6.79987	5.0343	3.30938	9.15437		0.645249	0.393454	0.291295	0.191488	0.52969		1.69245	0.470813	-0.396278	-0.748078	-1.09178	0.0728715
Bradi2g55450	3	32.7972	29.801	23.005	18.5992	15.7827	18.5953		0.908644	0.701431	0.567096	0.481221	0.566978		1.4209	0.982021	-0.0134408	-0.658788	-1.07133	-0.659355
Bradi2g55730	3	14.3438	11.3054	5.94469	3.76236	3.01368	6.0942		0.788172	0.414443	0.262299	0.210103	0.424866		1.55213	0.871915	-0.328197	-0.816758	-0.984367	-0.294726
Bradi2g56240	3	21.4232	19.1441	17.9595	13.6517	9.04952	11.495		0.893618	0.838323	0.637238	0.422417	0.53657		1.24218	0.767926	0.521422	-0.375023	-1.3327	-0.823805
Bradi2g56260	3	846.281	732.84	479.735	72.6494	7.23259	381.69		0.865954	0.566875	0.0858456	0.00854633	0.451021		1.25611	0.921785	0.175839	-1.02391	-1.21671	-0.113116
Bradi2g56340	3	30.5992	23.2914	23.6588	14.667	11.5044	12.825		0.761177	0.773182	0.479324	0.375971	0.419128		1.47583	0.510718	0.559231	-0.628286	-1.04595	-0.871546
Bradi2g56360	3	149.396	156.958	140.02	43.0248	25.796	50.3015		1.05062	0.93724	0.287992	0.172668	0.336699		0.911302	1.03627	0.756361	-0.846492	-1.1312	-0.726243
Bradi2g56380	3	31.0758	27.5881	25.0723	10.0511	6.51264	15.7064		0.88777	0.806813	0.323439	0.209573	0.505422		1.17104	0.823198	0.57228	-0.925881	-1.27879	-0.361844
Bradi2g56970	3	10.4546	10.4802	8.85093	0.530723	0.538741	0.681299		1.00245	0.846606	0.0507646	0.0515315	0.0651674		1.0089	1.01387	0.697667	-0.91707	-0.915514	-0.887848
Bradi2g57190	3	38.5471	39.6509	25.1017	10.3258	7.15597	23.3165		1.02864	0.651195	0.267875	0.185642	0.604883		1.06605	1.14703	0.0796266	-1.0044	-1.23696	-0.0513443
Bradi2g57201	3	9.52836	15.5627	2.21281	0.128423	0.0901313	0.0763827		1.6333	0.232234	0.0134779	0.00945927	0.00801635		0.758754	1.68774	-0.367476	-0.688369	-0.694264	-0.696381
Bradi2g57260	3	54.6583	51.0095	39.2228	27.4279	23.301	41.6343		0.933243	0.7176	0.501806	0.426303	0.76172		1.21414	0.921063	-0.0256639	-0.97305	-1.30452	0.168034
Bradi2g57440	3	29.9299	30.4681	19.3922	7.95977	10.2658	15.989		1.01798	0.647923	0.265947	0.342997	0.534217		1.14146	1.19767	0.040883	-1.15315	-0.9123	-0.314555
Bradi2g57650	3	21.5151	23.2858	18.7291	4.7272	3.29829	8.77971		1.0823	0.870511	0.219715	0.153301	0.408072		0.919379	1.11972	0.60417	-0.980036	-1.14171	-0.521527
Bradi2g57687	3	18.797	20.171	14.0282	10.6132	9.16552	13.2091		1.0731	0.7463	0.564623	0.487607	0.702724		1.01979	1.33354	-0.0690669	-0.848808	-1.17936	-0.256094
Bradi2g57952	3	29.1339	28.3028	22.804	14.423	11.9706	22.5816		0.971473	0.782729	0.49506	0.410882	0.775097		1.07816	0.960224	0.179928	-1.00934	-1.35734	0.148376
Bradi2g58060	3	9.53101	8.63499	8.00016	4.85671	3.81195	4.85207		0.905988	0.839382	0.509569	0.399952	0.509082		1.22034	0.845426	0.579798	-0.735491	-1.17264	-0.737434
Bradi2g58380	3	152.711	166.314	132.299	90.9609	52.0286	86.4599		1.08908	0.866337	0.595641	0.3407	0.566167		0.891184	1.20005	0.427712	-0.510916	-1.39491	-0.613116
Bradi2g58440	3	659.61	554.578	313.382	159.736	25.8937	145.507		0.840766	0.475102	0.242167	0.0392561	0.220595		1.3995	0.979314	0.0143929	-0.600281	-1.13573	-0.657205
Bradi2g58490	3	7.11064	5.70588	4.70652	2.60576	0.883407	1.66797		0.802442	0.661899	0.366459	0.124237	0.234574		1.36221	0.787665	0.378932	-0.480273	-1.18471	-0.863824
Bradi2g58720	3	66.4064	36.6984	22.3733	3.1379	0.677121	26.0779		0.552633	0.336914	0.0472529	0.0101966	0.392701		1.67518	0.446723	-0.145634	-0.941034	-1.04279	0.00755614
Bradi2g58790	3	5.8077	6.59598	3.05153	3.39428	4.5518	1.53208		1.13573	0.525428	0.584444	0.783753	0.263801		0.882518	1.30359	-0.589738	-0.406653	0.211659	-1.40138
Bradi2g60010	3	7.74669	9.08095	6.72339	2.57242	2.43975	4.05788		1.17224	0.867904	0.332067	0.314941	0.523821		0.823276	1.29883	0.458548	-1.02094	-1.06823	-0.491491
Bradi2g60310	3	17.8055	17.4369	16.8474	9.37517	4.35647	8.40307		0.979299	0.946188	0.526532	0.24467	0.471937		0.948409	0.884085	0.781204	-0.522751	-1.39856	-0.692391
Bradi2g60548	3	6.21369	6.38627	5.79172	2.75036	2.48583	2.12081		1.02777	0.93209	0.442629	0.400057	0.341312		0.945165	1.03002	0.737682	-0.757752	-0.887818	-1.0673
Bradi2g60680	3	98.9394	88.5021	72.216	34.1703	29.8306	18.7633		0.894508	0.729901	0.345366	0.301503	0.189644		1.2396	0.930587	0.448411	-0.677987	-0.806473	-1.13414
Bradi2g60910	3	50.4095	49.7156	42.3153	30.9723	23.3573	40.0374		0.986234	0.839431	0.614415	0.463352	0.794244		1.0294	0.964112	0.267886	-0.799274	-1.5157	0.053582
Bradi2g61017	3	35.7233	36.0906	29.7101	13.1246	10.8828	27.6923		1.01028	0.831674	0.367396	0.304642	0.775188		0.925226	0.958594	0.379031	-1.12748	-1.33111	0.195743
Bradi2g61030	3	18.049	24.7877	17.6487	1.41601	0.415669	0.151627		1.37335	0.977823	0.0784538	0.02303	0.00840082		0.695195	1.30857	0.658762	-0.818794	-0.909849	-0.933883
Bradi2g61150	3	341.002	180.368	78.3659	6.99249	5.13717	3.04588		0.528936	0.229811	0.0205057	0.0150649	0.00893217		1.75816	0.574094	-0.177789	-0.7039	-0.717576	-0.732992
Bradi2g61410	3	187.194	176.261	130.909	82.3803	54.7101	139.82		0.941595	0.699323	0.440079	0.292264	0.746926		1.13154	0.920602	0.0455971	-0.890701	-1.42456	0.217522
Bradi2g61500	3	299.852	291.382	218.398	197.53	120.483	137.732		0.971752	0.728353	0.65876	0.401808	0.459334		1.18548	1.0726	0.0999749	-0.178119	-1.2049	-0.975028
Bradi2g61580	3	81.5767	66.4338	60.5349	33.1781	25.744	48.9799		0.814372	0.74206	0.40671	0.315581	0.600415		1.37299	0.651964	0.371089	-0.931489	-1.28546	-0.179094
Bradi2g61830	3	61.2679	70.7906	47.7833	53.3086	27.7326	42.2729		1.15543	0.779908	0.87009	0.452645	0.689968		0.714871	1.3486	-0.182525	0.185182	-1.51689	-0.549241
Bradi2g62150	3	25.9523	22.2373	18.0049	7.74015	2.73751	7.78969		0.856852	0.69377	0.298246	0.105482	0.300154		1.2786	0.87861	0.422917	-0.682277	-1.22091	-0.676944
Bradi2g62200	3	15.1426	13.4623	9.27404	7.8173	6.55837	9.39653		0.889033	0.612447	0.516246	0.433108	0.620537		1.46122	0.956782	-0.30055	-0.73787	-1.11581	-0.263778
Bradi2g62426	3	15.5825	12.0767	11.1162	7.41624	7.72552	7.41264		0.77502	0.713376	0.475934	0.495782	0.475703		1.61677	0.55948	0.269785	-0.846076	-0.7528	-0.847162
Bradi2g62520	3	460.061	363.484	206.117	87.5386	69.9605	161.136		0.790077	0.448021	0.190276	0.152068	0.350248		1.50788	0.889101	-0.119167	-0.878913	-0.991538	-0.407368
Bradi3g00282	3	86.3344	100.117	90.6338	62.8387	38.0979	76.1139		1.15964	1.0498	0.727852	0.441283	0.881618		0.474942	1.08988	0.666765	-0.573346	-1.67718	0.0189454
Bradi3g00900	3	9.30923	6.18834	6.03932	4.07867	1.69917	2.94727		0.664753	0.648745	0.438132	0.182525	0.316597		1.56787	0.420744	0.365966	-0.354699	-1.22932	-0.770563
Bradi3g00910	3	359.569	238.594	145.535	102.539	15.1454	51.7595		0.663556	0.404749	0.285171	0.0421209	0.143949		1.62085	0.675324	-0.0520161	-0.388072	-1.07113	-0.784957
Bradi3g01350	3	26.3202	27.0754	22.1055	16.2432	11.2021	21.6945		1.02869	0.839868	0.617139	0.425608	0.824252		0.911289	1.03537	0.218841	-0.744292	-1.57252	0.151313
Bradi3g01810	3	35.0644	38.5433	30.9859	25.604	13.2295	30.3484		1.09922	0.883685	0.7302	0.377292	0.865505		0.687511	1.07949	0.227971	-0.378422	-1.7727	0.156147
Bradi3g01880	3	23.1066	26.1684	17.8881	10.5042	2.5821	5.1726		1.13251	0.774155	0.454596	0.111747	0.223858		0.91846	1.23551	0.378077	-0.386539	-1.20688	-0.93863
Bradi3g01930	3	72.6071	61.0414	51.7831	42.6778	34.8743	38.9259		0.84071	0.713197	0.587791	0.480315	0.536118		1.545	0.743304	0.10154	-0.529621	-1.07054	-0.789688
Bradi3g02170	3	536.33	607.43	469.048	207.074	153.033	340.398		1.13257	0.874551	0.386095	0.285333	0.63468		0.825281	1.21445	0.457014	-0.976898	-1.27269	-0.247152
Bradi3g02530	3	8.89641	7.82564	5.84601	2.26769	0.895343	1.59705		0.879641	0.657121	0.2549	0.100641	0.179516		1.26838	0.955569	0.377244	-0.668119	-1.06904	-0.86404
Bradi3g02600	3	283.891	471.615	116.07	50.8295	50.7938	38.8737		1.66125	0.408855	0.179046	0.17892	0.136932		0.659819	1.73491	-0.301289	-0.674922	-0.675126	-0.743393
Bradi3g02817	3	53.7301	49.0528	40.7061	22.029	7.12833	15.2591		0.912947	0.757603	0.409993	0.132669	0.283995		1.17016	0.925952	0.490174	-0.484955	-1.26292	-0.838412
Bradi3g03070	3	95.513	46.4675	37.4784	6.65785	4.92692	3.07736		0.486505	0.39239	0.0697062	0.0515838	0.0322193		1.75387	0.39193	0.142311	-0.713539	-0.761604	-0.812965
Bradi3g03160	3	54.2416	42.7912	35.7687	20.1081	9.74894	18.6708		0.7889	0.659434	0.370713	0.179732	0.344216		1.42505	0.745724	0.329099	-0.600008	-1.21459	-0.685275
Bradi3g03460	3	20.6339	16.7898	13.5498	4.03626	2.28689	5.88388		0.8137	0.65668	0.195613	0.110832	0.285157		1.34515	0.833372	0.40203	-0.864544	-1.09744	-0.618564
Bradi3g04010	3	31.4754	28.4958	18.6782	9.27577	6.82457	12.1258		0.905335	0.593422	0.294699	0.216822	0.385248		1.33018	1.0401	0.0842724	-0.831127	-1.06977	-0.553652
Bradi3g04440	3	47.0559	47.233	31.4698	6.66493	1.48965	4.70314		1.00376	0.668774	0.141639	0.031657	0.0999481		1.11636	1.12461	0.389954	-0.7661	-1.0073	-0.857531
Bradi3g04750	3	64.8118	69.5555	75.1065	14.4089	5.8136	17.1583		1.07319	1.15884	0.222319	0.0896997	0.264741		0.744104	0.893233	1.06774	-0.840432	-1.11065	-0.753998
Bradi3g05410	3	235.999	217.485	173.444	124.487	126.889	85.4146		0.921552	0.734935	0.52749	0.537667	0.361928		1.28598	0.970131	0.218782	-0.616428	-0.575452	-1.28301
Bradi3g05420	3	92.2023	69.9022	70.0586	46.7812	43.973	47.2239		0.758139	0.759836	0.507376	0.476918	0.512177		1.60195	0.431146	0.439359	-0.782755	-0.930194	-0.75951
Bradi3g05800	3	32.9986	31.1447	20.3906	15.1168	5.34398	7.1016		0.943819	0.617923	0.458105	0.161945	0.215209		1.22049	1.06244	0.145604	-0.304008	-1.13718	-0.987337
Bradi3g05860	3	17.1444	10.9497	8.38957	4.52826	3.14592	6.38824		0.638673	0.489346	0.264124	0.183495	0.372613		1.71275	0.496013	-0.0068316	-0.765249	-1.03676	-0.399922
Bradi3g05867	3	21.7532	20.2492	14.7088	10.9343	7.49298	12.8521		0.930859	0.676165	0.50265	0.344454	0.590815		1.2938	1.01927	0.00797171	-0.680994	-1.30913	-0.330921
Bradi3g06060	3	158.833	148.196	103.6	73.4017	59.3068	57.3672		0.933032	0.652256	0.462133	0.373392	0.36118		1.31436	1.07626	0.0779508	-0.598037	-0.913558	-0.956977
Bradi3g06350	3	246.778	202.333	151.852	83.4128	73.5698	164.594		0.819898	0.615337	0.338007	0.298121	0.66697		1.38632	0.723941	-0.0283849	-1.04834	-1.19504	0.161507
Bradi3g06397	3	25.328	21.0783	20.4196	14.392	10.2847	15.9309		0.832211	0.806203	0.568222	0.40606	0.628984		1.37452	0.587535	0.465547	-0.650667	-1.41126	-0.365674
Bradi3g06472	3	23.9416	15.6603	15.3854	11.1754	9.27082	14.5542		0.654105	0.642621	0.466776	0.387226	0.607904		1.76636	0.130817	0.0765166	-0.754952	-1.1311	-0.0876409
Bradi3g06757	3	9.49562	13.0384	4.39447	1.49589	1.40422	0.48642		1.3731	0.46279	0.157534	0.147881	0.0512257		0.86884	1.56162	-0.128676	-0.695487	-0.713412	-0.892886
Bradi3g06780	3	11.7655	9.91253	4.42796	1.83277	0.55398	6.10682		0.842511	0.376352	0.155775	0.0470853	0.519046		1.35688	0.937769	-0.302784	-0.889789	-1.17904	0.0769578
Bradi3g07230	3	20.7889	19.7568	16.0246	5.53109	2.30258	9.21973		0.95035	0.770824	0.266059	0.11076	0.443492		1.10565	0.971673	0.487255	-0.874766	-1.29381	-0.395994
Bradi3g07440	3	28.3992	27.0034	18.8759	12.721	6.07237	5.40752		0.950851	0.664663	0.447933	0.213822	0.190411		1.19434	1.05526	0.245393	-0.367916	-1.03041	-1.09666
Bradi3g07660	3	10.7087	9.92036	7.85068	5.4221	3.13531	4.36216		0.926385	0.733114	0.506328	0.292782	0.407348		1.23795	0.98173	0.309034	-0.480315	-1.22358	-0.824823
Bradi3g07690	3	9.84367	7.74394	4.96502	2.20178	2.2592	3.92051		0.786692	0.504387	0.223675	0.229508	0.398277		1.52333	0.841038	-0.0619565	-0.959855	-0.941198	-0.401364
Bradi3g07750	3	10.8259	11.3694	5.97155	2.01147	0.432182	4.78001		1.0502	0.551597	0.185801	0.039921	0.441533		1.09932	1.22057	0.0163128	-0.867173	-1.21951	-0.249518
Bradi3g08460	3	5.44587	5.97279	1.886	2.03853	0.646069	0.584635		1.09676	0.346317	0.374327	0.118635	0.107354		1.13358	1.35616	-0.370172	-0.305738	-0.893939	-0.91989
Bradi3g09010	3	308.819	340.589	278.43	174.197	87.1022	210.688		1.10288	0.901596	0.564074	0.282049	0.682239		0.799295	1.13557	0.477639	-0.625631	-1.5475	-0.239381
Bradi3g09087	3	17.9457	17.5793	12.4486	8.19853	4.35212	8.76094		0.979579	0.69368	0.456852	0.242516	0.488191		1.17251	1.10535	0.165126	-0.613725	-1.3186	-0.51066
Bradi3g09160	3	6.42778	6.3807	4.97804	2.63675	2.96561	4.57198		0.992676	0.774456	0.410212	0.461373	0.711284		1.08959	1.06057	0.195952	-1.24724	-1.04453	-0.0543464
Bradi3g09350	3	74.0758	73.3003	56.5956	22.8807	14.0804	35.3848		0.989531	0.764023	0.308883	0.19008	0.477684		1.08884	1.0587	0.409637	-0.900361	-1.2423	-0.414512
Bradi3g09470	3	469.317	543.007	499.571	144.182	77.7007	110.694		1.15702	1.06447	0.307218	0.165561	0.235863		0.744041	1.08269	0.883079	-0.750131	-1.05565	-0.904027
Bradi3g09620	3	14.1746	11.6153	10.8214	2.49242	0.914265	2.63717		0.819449	0.763435	0.175837	0.0645004	0.186049		1.23482	0.787538	0.648776	-0.806871	-1.08268	-0.781573
Bradi3g09780	3	33.3311	33.6835	30.5111	18.4278	10.747	21.0043		1.01057	0.915394	0.55287	0.322431	0.630173		0.932474	0.970181	0.630697	-0.662379	-1.48432	-0.38665
Bradi3g09890	3	11.4626	10.0238	6.84787	4.26197	4.17201	4.60227		0.874481	0.597411	0.371816	0.363968	0.401504		1.44065	0.98684	-0.014892	-0.830519	-0.858894	-0.723185
Bradi3g10020	3	20.7136	12.2953	8.03421	2.92771	0.946018	3.15096		0.593584	0.38787	0.141342	0.0456712	0.15212		1.7002	0.573407	0.0030658	-0.680434	-0.945683	-0.650552
Bradi3g10200	3	199.327	185.234	156.029	85.4601	18.7584	70.5949		0.929296	0.782783	0.428744	0.0941087	0.354167		1.11658	0.920104	0.512969	-0.470841	-1.40073	-0.678077
Bradi3g10210	3	133.705	129.444	104.779	45.7192	34.2133	65.1125		0.968127	0.783661	0.34194	0.255886	0.486986		1.12055	1.0215	0.448222	-0.924533	-1.19197	-0.473769
Bradi3g10270	3	4.94796	5.18897	3.70801	1.31888	0.853856	1.25862		1.04871	0.749401	0.266549	0.172567	0.254371		1.04842	1.17057	0.419972	-0.79091	-1.0266	-0.82145
Bradi3g10560	3	7.2044	6.41816	5.87261	2.0269	1.24507	2.26311		0.890868	0.815142	0.281342	0.172821	0.314129		1.16392	0.862175	0.652793	-0.823163	-1.12322	-0.732506
Bradi3g10770	3	213.762	187.295	106.083	112.166	36.7065	98.6659		0.876185	0.496265	0.524722	0.171716	0.461568		1.36517	0.954502	-0.305626	-0.211239	-1.3821	-0.420711
Bradi3g10810	3	107.459	95.655	62.0711	42.8781	33.2677	64.5533		0.890154	0.577626	0.399019	0.309585	0.600726		1.37273	0.965719	-0.192273	-0.854058	-1.18543	-0.106683
Bradi3g11050	3	49.2961	63.3632	31.3377	8.21699	7.22573	4.77141		1.28536	0.635703	0.166686	0.146578	0.0967908		0.884158	1.45137	0.160044	-0.772223	-0.812192	-0.911154
Bradi3g11300	3	16.9016	21.1139	14.644	8.61798	8.10978	7.66691		1.24922	0.866423	0.50989	0.479822	0.45362		0.728666	1.4848	0.3234	-0.758306	-0.849532	-0.929029
Bradi3g12720	3	124.729	114.681	95.7665	72.3954	61.4008	78.2917		0.919444	0.767798	0.580422	0.492275	0.627696		1.34512	0.941892	0.182828	-0.755079	-1.1963	-0.518454
Bradi3g12950	3	18.455	17.8573	14.9351	8.70429	4.22479	11.8902		0.967615	0.809273	0.47165	0.228925	0.644284		1.04382	0.935838	0.407856	-0.717933	-1.52729	-0.142294
Bradi3g13027	3	110.622	107.751	96.9254	28.8828	14.7701	23.879		0.974045	0.876188	0.261095	0.133519	0.215862		1.02465	0.961814	0.724891	-0.764322	-1.0732	-0.873838
Bradi3g13440	3	12.1315	16.7404	7.97162	3.87357	4.83368	4.25674		1.3799	0.657099	0.319298	0.398439	0.350882		0.739927	1.63025	-0.0636771	-0.855329	-0.669858	-0.78131
Bradi3g13450	3	102.024	88.7016	40.5677	28.4159	26.879	55.9836		0.869421	0.39763	0.278523	0.263458	0.548731		1.41688	0.996747	-0.521219	-0.904441	-0.952909	-0.035057
Bradi3g13527	3	7.26912	8.32774	7.00398	2.79835	1.54104	2.63263		1.14563	0.963525	0.384964	0.211998	0.362166		0.801548	1.16412	0.710738	-0.729675	-1.1603	-0.786433
Bradi3g13670	3	74.6554	54.1447	39.4473	8.16129	4.88254	13.3011		0.725262	0.528392	0.109319	0.0654011	0.178166		1.48957	0.765985	0.247485	-0.85623	-0.971898	-0.674907
Bradi3g13970	3	1132.86	938.281	715.595	517.632	372.064	646.159		0.828238	0.631669	0.456924	0.328427	0.570377		1.48517	0.784474	-0.0174212	-0.730285	-1.25448	-0.267459
Bradi3g14260	3	87.4458	69.4063	59.0807	49.8813	41.6782	61.1311		0.793707	0.675627	0.570425	0.476617	0.699074		1.63221	0.500112	-0.147887	-0.72521	-1.24001	-0.0192105
Bradi3g15750	3	8.69336	4.82838	4.20227	1.23839	0.82933	1.60505		0.555411	0.483388	0.142452	0.0953981	0.184629		1.7083	0.420561	0.211951	-0.775564	-0.911854	-0.653398
Bradi3g15816	3	29.9916	33.853	23.0176	2.87875	1.76002	0.532932		1.12875	0.767467	0.0959851	0.0586836	0.0177694		0.955712	1.20757	0.500832	-0.812714	-0.885683	-0.965719
Bradi3g15935	3	14.4891	12.7037	9.11165	5.22862	3.10089	7.53938		0.876775	0.628862	0.360865	0.214015	0.520348		1.33292	0.922153	0.0957306	-0.79764	-1.28717	-0.266003
Bradi3g15970	3	15.5063	14.3807	10.7486	8.58638	7.96875	6.20978		0.927409	0.693174	0.553733	0.513903	0.400467		1.33323	1.02942	0.0490787	-0.534523	-0.701225	-1.17599
Bradi3g16110	3	41.5464	24.0344	18.9144	13.8961	5.54223	14.1443		0.578496	0.455261	0.334471	0.133399	0.340446		1.77169	0.352833	-0.0619972	-0.468598	-1.14544	-0.448487
Bradi3g16180	3	867.301	708.179	682.218	467.883	385.378	463.869		0.816533	0.786599	0.53947	0.444341	0.534842		1.46442	0.606139	0.466103	-0.689997	-1.13502	-0.711647
Bradi3g16187	3	345.009	260.778	225.315	89.5435	41.0196	183.909		0.75586	0.653071	0.25954	0.118894	0.533057		1.377	0.624236	0.307304	-0.906073	-1.33973	-0.0627347
Bradi3g16307	3	187.615	199.249	144.484	28.0559	6.39062	38.7765		1.06201	0.770105	0.149539	0.0340623	0.206681		1.00708	1.14197	0.506962	-0.843038	-1.09425	-0.71873
Bradi3g16515	3	704.851	674.21	388.897	132.801	17.7868	13.6787		0.956528	0.551744	0.18841	0.0252348	0.0194065		1.21238	1.11533	0.211746	-0.599314	-0.963566	-0.976576
Bradi3g17550	3	84.3316	74.4402	65.7915	43.2338	34.9278	42.3604		0.882709	0.780153	0.512665	0.414172	0.502307		1.33491	0.84254	0.412028	-0.710847	-1.12431	-0.754327
Bradi3g17640	3	10019.9	8684.66	7112.07	5448.83	3317.58	4071.09		0.866745	0.709797	0.543803	0.3311	0.406302		1.359	0.851794	0.254408	-0.37741	-1.18701	-0.900778
Bradi3g17715	3	50.3986	65.5956	23.9756	12.1911	9.27578	4.59904		1.30154	0.475719	0.241894	0.184048	0.0912534		0.915833	1.52826	-0.148987	-0.623889	-0.741374	-0.929842
Bradi3g17722	3	51.553	60.2654	13.8516	9.08407	7.88161	2.23419		1.169	0.268687	0.176208	0.152884	0.0433377		1.09488	1.44291	-0.411192	-0.601643	-0.649678	-0.875277
Bradi3g17750	3	125.272	102.983	23.4429	21.8799	30.948	8.36863		0.822076	0.187136	0.174659	0.247046	0.0668037		1.49029	1.03603	-0.585048	-0.616903	-0.432091	-0.89227
Bradi3g17920	3	80.9177	56.9123	73.5415	26.5486	9.40815	21.0347		0.703336	0.908843	0.328094	0.116268	0.259952		1.21616	0.409475	0.968285	-0.610877	-1.18687	-0.796169
Bradi3g17950	3	57.1867	53.444	33.2065	20.4859	22.0711	25.6405		0.934553	0.580668	0.358228	0.385948	0.448364		1.35474	1.12266	-0.132239	-0.921025	-0.822729	-0.601398
Bradi3g18470	3	33.0799	33.7869	29.4616	20.1645	13.3199	17.9395		1.02137	0.890619	0.609569	0.402657	0.542309		0.981207	1.06326	0.561276	-0.517717	-1.31209	-0.77594
Bradi3g18580	3	68.4317	86.2396	46.6394	27.0174	22.7972	17.1006		1.26023	0.681546	0.394807	0.333138	0.249893		0.855452	1.49748	0.0697649	-0.637673	-0.789823	-0.995204
Bradi3g18590	3	687.714	572.311	402.585	107.296	41.1822	68.2232		0.832192	0.585396	0.156018	0.0598827	0.0992029		1.33784	0.925573	0.319251	-0.735632	-0.971816	-0.875215
Bradi3g18600	3	77.1751	77.3611	46.4411	47.9838	44.1672	29.3619		1.00241	0.601762	0.621752	0.572298	0.380458		1.2083	1.2179	-0.376894	-0.297325	-0.494178	-1.2578
Bradi3g18680	3	5.82117	5.60726	4.70094	3.37659	1.85426	4.21349		0.963253	0.807559	0.580053	0.318538	0.723822		1.05019	0.906086	0.295513	-0.596679	-1.62224	-0.0328704
Bradi3g18830	3	21.0314	16.9125	15.1128	14.9866	8.38787	10.2302		0.804151	0.718581	0.712582	0.398825	0.486424		1.43991	0.539627	0.146273	0.118695	-1.32359	-0.920914
Bradi3g18930	3	87.6484	98.8743	74.5399	50.3641	40.0035	42.7703		1.12808	0.850443	0.574615	0.456409	0.487976		0.884081	1.33626	0.356071	-0.617736	-1.03506	-0.923614
Bradi3g19130	3	46.6671	54.2435	41.6888	15.8561	11.685	15.9894		1.16235	0.893322	0.339771	0.250391	0.342626		0.841667	1.24925	0.573851	-0.815847	-1.04024	-0.808681
Bradi3g20690	3	36.4377	29.8699	23.2835	17.0167	14.9246	17.4037		0.819752	0.638995	0.467008	0.40959	0.477629		1.56519	0.791201	0.0150241	-0.72349	-0.970044	-0.677883
Bradi3g20840	3	29.3096	30.781	29.1569	18.96	12.6202	24.6655		1.0502	0.994789	0.646886	0.430582	0.84155		0.707621	0.913354	0.686266	-0.739518	-1.62598	0.0582587
Bradi3g20940	3	17.2646	12.2261	11.0156	1.43154	3.84206	8.33778		0.708159	0.638043	0.0829173	0.222539	0.48294		1.42624	0.554666	0.345265	-1.3126	-0.895625	-0.117944
Bradi3g22030	3	378.627	344.424	302.362	196.459	77.2541	228.091		0.909664	0.798574	0.518872	0.204037	0.602417		1.12102	0.812027	0.432051	-0.52466	-1.60154	-0.238899
Bradi3g22635	3	19.6689	21.0616	17.5282	10.2877	8.37636	13.4799		1.07081	0.891162	0.523047	0.425869	0.685341		0.891258	1.161	0.47665	-0.925653	-1.29584	-0.307408
Bradi3g26391	3	11590.8	9917.49	7778.59	6228.22	3086.05	3998.53		0.855638	0.671103	0.537344	0.266251	0.344976		1.35334	0.849088	0.204517	-0.262698	-1.20961	-0.93463
Bradi3g26860	3	39.3047	43.986	27.8038	21.0656	8.76242	31.4029		1.1191	0.707392	0.535957	0.222935	0.798959		0.831533	1.19933	-0.0720514	-0.601449	-1.56807	0.21071
Bradi3g26930	3	541.811	445.419	330.306	192.749	101.958	154.345		0.822094	0.609633	0.355749	0.188179	0.284869		1.41747	0.865149	0.205558	-0.582631	-1.10286	-0.802683
Bradi3g27266	3	57.835	39.7758	35.8791	17.2392	15.3401	21.0327		0.687746	0.62037	0.298076	0.265239	0.363667		1.61915	0.521999	0.285263	-0.847165	-0.962543	-0.616702
Bradi3g29460	3	11.3753	10.7111	7.61324	3.02333	3.20011	6.24226		0.941611	0.669281	0.265781	0.281322	0.548758		1.21415	1.02866	0.163563	-1.11822	-1.06885	-0.219298
Bradi3g29840	3	124.998	101.124	63.7936	78.2495	42.8099	43.3523		0.809009	0.510359	0.626008	0.342486	0.346825		1.506	0.776372	-0.364533	0.0772705	-1.00584	-0.989264
Bradi3g30017	3	73.3392	60.2805	52.3877	30.1334	16.3839	23.4907		0.821941	0.71432	0.410878	0.223399	0.320301		1.35513	0.778143	0.429402	-0.553886	-1.1614	-0.847393
Bradi3g30110	3	215.909	198.607	177.863	50.1532	31.8909	55.614		0.919866	0.823789	0.232289	0.147705	0.257581		1.11843	0.91309	0.666892	-0.848827	-1.06557	-0.784016
Bradi3g30260	3	138.779	126.489	75.0857	73.5527	57.0565	89.3218		0.911446	0.541047	0.530001	0.411134	0.643629		1.4049	1.02459	-0.566167	-0.613609	-1.12411	-0.125609
Bradi3g30277	3	7.05799	9.07808	7.21104	3.68271	1.61751	5.05741		1.28621	1.02168	0.521779	0.229175	0.71655		0.532095	1.27826	0.588628	-0.714644	-1.47747	-0.206868
Bradi3g30470	3	8.12596	6.5766	7.24207	3.5063	2.58573	4.56326		0.809332	0.891226	0.431494	0.318206	0.561565		1.2187	0.517453	0.818645	-0.872175	-1.28883	-0.393794
Bradi3g30490	3	25.2376	29.3446	25.2942	11.3079	5.48011	8.77863		1.16273	1.00224	0.448056	0.217141	0.347839		0.751668	1.15448	0.757214	-0.614568	-1.18616	-0.862636
Bradi3g30500	3	762.638	659.3	447.95	126.029	12.1918	329.134		0.864499	0.587369	0.165254	0.0159864	0.431572		1.27098	0.91895	0.198975	-0.897666	-1.28546	-0.205779
Bradi3g30710	3	121.521	118.726	99.1214	59.4813	41.2034	67.6455		0.976998	0.815673	0.489474	0.339064	0.556657		1.10867	1.02469	0.43575	-0.755092	-1.30419	-0.509828
Bradi3g31550	3	40.7237	31.5975	32.2835	18.2989	16.903	21.6644		0.7759	0.792745	0.449343	0.415065	0.531985		1.46657	0.497537	0.570374	-0.91454	-1.06276	-0.557184
Bradi3g31620	3	10.7523	11.0161	7.52488	5.61312	2.3915	2.13124		1.02453	0.699837	0.522037	0.222417	0.198211		1.0706	1.13814	0.24413	-0.245424	-1.0704	-1.13705
Bradi3g31777	3	30.916	24.0107	27.3889	11.4503	8.86541	9.58078		0.776644	0.885913	0.370369	0.286758	0.309897		1.23967	0.538811	0.881684	-0.736017	-0.998378	-0.925771
Bradi3g31967	3	7.52556	6.8485	3.92388	0.579039	0.105664	0.197154		0.910031	0.521407	0.0769429	0.0140406	0.0261979		1.27094	1.07216	0.213513	-0.768503	-0.907482	-0.880621
Bradi3g32040	3	96.5339	80.1926	57.3141	37.3939	26.5235	51.045		0.83072	0.59372	0.387366	0.274759	0.528779		1.46241	0.839539	-0.0325178	-0.791809	-1.20615	-0.271473
Bradi3g32047	3	22.4344	24.0978	15.3272	5.53334	3.63231	3.62742		1.07415	0.683204	0.246646	0.161908	0.16169		1.05673	1.23265	0.30512	-0.73063	-0.931673	-0.93219
Bradi3g32240	3	61.7268	56.9355	53.2627	39.1408	28.6166	30.7384		0.922378	0.862878	0.634097	0.463601	0.497975		1.1798	0.840424	0.580283	-0.419977	-1.16541	-1.01512
Bradi3g32720	3	9.45193	8.95315	8.79595	5.38755	3.30278	6.14847		0.94723	0.930599	0.569995	0.349429	0.650499		0.997513	0.794045	0.729919	-0.660479	-1.51093	-0.350074
Bradi3g33070	3	64.3117	59.6726	65.4966	38.4492	27.8763	52.719		0.927865	1.01843	0.597857	0.433457	0.819743		0.847533	0.542524	0.92544	-0.852855	-1.54799	0.0853475
Bradi3g33150	3	27.8743	25.0952	14.9115	4.98494	1.85607	2.86336		0.900298	0.534953	0.178836	0.066587	0.102724		1.29836	1.05689	0.172081	-0.690382	-0.962232	-0.874714
Bradi3g33400	3	118.043	95.1871	62.3772	58.8722	46.3709	78.4043		0.806374	0.528426	0.498734	0.39283	0.664199		1.56934	0.705039	-0.535657	-0.668196	-1.14093	0.0704027
Bradi3g33880	3	38.1694	40.466	28.6999	14.6814	13.2388	24.304		1.06017	0.751908	0.384639	0.346844	0.636739		1.01036	1.2108	0.183864	-1.03965	-1.16556	-0.199808
Bradi3g33930	3	70.5656	80.1203	48.1246	23.6357	15.2671	38.0344		1.1354	0.681983	0.334947	0.216353	0.538994		0.960725	1.33376	0.0845884	-0.871498	-1.19822	-0.309347
Bradi3g33980	3	31.3107	31.4201	22.0806	12.3804	13.2479	23.6456		1.00349	0.705211	0.395405	0.42311	0.755192		1.07661	1.08976	-0.0320597	-1.19721	-1.09301	0.155915
Bradi3g34077	3	76.0753	61.9013	35.0303	11.1279	6.30783	35.1366		0.813685	0.46047	0.146275	0.0829156	0.461867		1.40251	0.885887	-0.0935359	-0.964757	-1.14045	-0.0896621
Bradi3g34141	3	10.915	9.03666	7.24497	3.18416	1.82327	3.65334		0.827914	0.663764	0.291724	0.167043	0.334709		1.36135	0.843599	0.349723	-0.769625	-1.14475	-0.640296
Bradi3g34240	3	83.687	107.174	66.4104	23.1873	22.3121	13.8129		1.28066	0.793557	0.277072	0.266614	0.165054		0.802602	1.41221	0.35419	-0.767658	-0.790373	-1.01097
Bradi3g34245	3	51.8606	36.6814	32.6713	25.0042	13.3748	28.3201		0.707308	0.629983	0.482142	0.257899	0.546082		1.60073	0.417889	0.105398	-0.492063	-1.39829	-0.233667
Bradi3g34400	3	508.572	434.492	331.081	167.196	82.7316	220.715		0.854337	0.651001	0.328756	0.162674	0.433989		1.33437	0.880459	0.246827	-0.757348	-1.27489	-0.429422
Bradi3g34600	3	8.5785	9.23872	8.15192	6.81844	3.07246	5.99097		1.07696	0.950274	0.794829	0.358158	0.69837		0.71272	1.0062	0.523095	-0.0696695	-1.73485	-0.4375
Bradi3g34830	3	39.4628	34.9285	32.0741	17.9656	11.6419	14.0212		0.885099	0.812768	0.455255	0.295009	0.355302		1.21559	0.834073	0.593903	-0.593198	-1.12529	-0.925086
Bradi3g34850	3	251.493	140.012	119.127	38.9714	27.4363	13.627		0.556724	0.473679	0.154961	0.109094	0.0541844		1.68292	0.457077	0.227424	-0.653963	-0.780803	-0.93265
Bradi3g34990	3	66.3452	45.792	41.9663	32.4767	19.319	41.7829		0.690208	0.632545	0.489511	0.291189	0.629781		1.61181	0.290123	0.0441106	-0.566123	-1.41224	0.0323188
Bradi3g35180	3	126.235	112.812	87.8336	59.979	34.9937	28.6209		0.893662	0.695792	0.475136	0.27721	0.226727		1.26348	0.931934	0.315016	-0.372947	-0.990042	-1.14744
Bradi3g35250	3	16.7408	11.5001	9.62297	1.28748	1.6443	4.10572		0.686955	0.574823	0.076907	0.0982213	0.245253		1.50052	0.651055	0.346782	-1.00433	-0.946497	-0.54752
Bradi3g35590	3	79.0517	69.5402	58.6303	50.8311	31.4685	32.9636		0.879679	0.74167	0.64301	0.398075	0.416988		1.31537	0.820933	0.253815	-0.151606	-1.15811	-1.08039
Bradi3g35630	3	27.3172	21.2778	19.1027	10.2945	3.00648	5.4665		0.778916	0.699292	0.376851	0.110058	0.200112		1.34158	0.713798	0.487703	-0.427884	-1.18545	-0.929742
Bradi3g36120	3	33.0607	24.7565	21.4028	14.8592	5.05274	11.1458		0.748819	0.647381	0.449451	0.152832	0.337132		1.45698	0.632853	0.300032	-0.349378	-1.32259	-0.717899
Bradi3g36480	3	499.002	546.714	436.648	215.967	147.481	307.333		1.09561	0.875044	0.432798	0.295552	0.615895		0.8734	1.17075	0.484805	-0.890515	-1.31733	-0.321109
Bradi3g36600	3	211.483	189.861	109.404	106.673	66.8338	68.1923		0.89776	0.517319	0.504405	0.316025	0.322448		1.40095	1.04903	-0.260474	-0.304927	-0.953344	-0.931233
Bradi3g36697	3	15.0678	21.2745	12.9806	2.09066	2.92538	6.85813		1.41191	0.861479	0.13875	0.194147	0.45515		0.646048	1.4697	0.369065	-1.07608	-0.965312	-0.443418
Bradi3g36760	3	4644.08	4287.7	3014.23	2564.43	1140.13	985.167		0.923261	0.649047	0.552194	0.245502	0.212134		1.22031	0.987924	0.157541	-0.135753	-1.06449	-1.16553
Bradi3g37030	3	6.65946	6.39455	3.44795	3.85907	2.74913	4.3379		0.960221	0.517753	0.579487	0.412816	0.65139		1.30154	1.13615	-0.70342	-0.446759	-1.1397	-0.147819
Bradi3g37321	3	6.00761	6.43445	4.19601	1.28596	0.867961	0.256213		1.07105	0.698449	0.214055	0.144477	0.0426482		1.03999	1.19669	0.374933	-0.693376	-0.846826	-1.0714
Bradi3g37620	3	102.162	79.9922	71.7314	70.9646	46.3901	60.4013		0.78299	0.702131	0.694626	0.454082	0.591228		1.60848	0.428535	-0.0111213	-0.0519285	-1.35984	-0.614132
Bradi3g37640	3	28.0803	26.9314	15.9277	3.44151	1.06135	1.86384		0.959086	0.567219	0.12256	0.0377969	0.0663753		1.21053	1.11901	0.242436	-0.752232	-0.941839	-0.877912
Bradi3g37770	3	101.682	96.2586	82.0445	53.983	49.706	76.9391		0.946665	0.806874	0.530901	0.488838	0.756666		1.16667	0.912699	0.247056	-1.06705	-1.26735	0.00797551
Bradi3g38227	3	27.3721	23.6287	15.7143	6.88233	3.9888	4.36963		0.863241	0.574099	0.251437	0.145725	0.159638		1.34803	0.980036	0.202014	-0.666207	-0.950654	-0.913217
Bradi3g38410	3	419.376	373.796	201.753	64.0099	106.718	146.984		0.891314	0.481079	0.152631	0.254468	0.350482		1.37629	1.06358	-0.116769	-1.06179	-0.76878	-0.492526
Bradi3g39880	3	59.7114	67.8059	49.6208	14.2311	9.30087	16.5331		1.13556	0.831012	0.238331	0.155764	0.276884		0.911736	1.22564	0.520431	-0.851963	-1.04315	-0.76269
Bradi3g39927	3	152.991	114.734	140.79	75.1628	39.0438	99.6383		0.749938	0.920248	0.491287	0.255202	0.651267		1.16518	0.260338	0.876598	-0.675577	-1.52984	-0.0966966
Bradi3g40103	3	9.99144	8.28253	7.46702	1.91464	0.702026	2.60313		0.828962	0.747341	0.191628	0.0702627	0.260536		1.24447	0.804278	0.594216	-0.835985	-1.14833	-0.658641
Bradi3g40190	3	52.0738	54.1646	44.7011	27.6571	19.2355	19.0015		1.04015	0.85842	0.531114	0.36939	0.364895		0.986903	1.1164	0.530289	-0.525311	-1.04689	-1.06139
Bradi3g40270	3	46.3119	42.6291	35.0268	17.3477	14.9058	20.523		0.920479	0.756324	0.374585	0.321858	0.443147		1.23796	0.967463	0.409073	-0.889454	-1.06881	-0.656232
Bradi3g40497	3	8.53658	5.00694	3.15727	1.25409	1.42027	0.654611		0.586527	0.369852	0.146908	0.166375	0.0766831		1.73153	0.555818	-0.0602985	-0.694239	-0.638885	-0.893924
Bradi3g40600	3	5.78384	7.38331	3.57852	1.75246	1.659	1.95269		1.27654	0.61871	0.302992	0.286833	0.33761		0.872499	1.5374	-0.0442497	-0.803343	-0.842193	-0.720108
Bradi3g41297	3	8.8249	8.02817	6.13428	3.6339	1.77891	2.31531		0.909718	0.69511	0.411779	0.201578	0.262361		1.24283	0.975621	0.340431	-0.498166	-1.12031	-0.940408
Bradi3g42020	3	20.0288	21.7254	19.0962	12.7502	7.10041	15.3013		1.0847	0.953433	0.636593	0.354509	0.763963		0.738329	1.04927	0.567388	-0.595685	-1.63117	-0.128128
Bradi3g42050	3	46.9573	43.3505	30.1707	17.8674	9.41363	14.1569		0.923191	0.642514	0.380504	0.200472	0.301485		1.2716	1.04196	0.202772	-0.580603	-1.11887	-0.816859
Bradi3g42100	3	65.3104	62.3743	53.7019	30.9771	25.7996	23.2832		0.955044	0.822256	0.474305	0.395031	0.356501		1.1409	0.986787	0.531579	-0.661221	-0.93298	-1.06506
Bradi3g42190	3	12.8571	15.5581	13.2487	4.1986	2.06936	6.63796		1.21008	1.03045	0.326559	0.160951	0.516288		0.681107	1.1701	0.751997	-0.886449	-1.27193	-0.44482
Bradi3g42220	3	33.0086	22.7822	18.6328	20.5356	2.18604	20.9115		0.69019	0.564483	0.622127	0.0662265	0.633515		1.33773	0.311653	-0.104681	0.0862322	-1.75488	0.123949
Bradi3g42280	3	22.9255	22.4054	12.8652	5.98151	5.98337	4.80683		0.977313	0.561175	0.26091	0.260991	0.209672		1.2448	1.18273	0.0442241	-0.777266	-0.777044	-0.91745
Bradi3g42410	3	39.5407	38.1589	30.4783	22.8455	21.9438	19.5051		0.965054	0.770808	0.577772	0.554967	0.493292		1.24719	1.08755	0.200201	-0.681613	-0.78579	-1.06753
Bradi3g42580	3	242.138	243.779	185.3	115.837	57.9242	167.476		1.00678	0.765268	0.47839	0.23922	0.691654		1.01059	1.03319	0.22799	-0.728466	-1.52587	-0.0174413
Bradi3g43143	3	6.85812	6.16669	4.36328	1.60848	0.86901	0.910674		0.899181	0.63622	0.234536	0.126713	0.132788		1.25964	1.00313	0.334095	-0.687889	-0.962218	-0.946761
Bradi3g43540	3	113.489	106.058	74.9379	33.2759	21.5417	38.8507		0.934526	0.66031	0.293208	0.189813	0.34233		1.24233	1.05315	0.260846	-0.799836	-1.09858	-0.657907
Bradi3g44071	3	106.014	93.5205	87.1342	68.9401	43.4942	55.347		0.88215	0.82191	0.650291	0.410267	0.522071		1.26479	0.742796	0.475976	-0.28417	-1.3473	-0.852088
Bradi3g44260	3	14.2691	14.1806	7.77422	0.530488	0.355553	1.11071		0.993793	0.544828	0.0371773	0.0249176	0.0778398		1.18197	1.16872	0.210104	-0.873814	-0.89999	-0.786993
Bradi3g44330	3	36.6954	31.3216	33.9611	3.63401	3.02538	4.08807		0.853556	0.925487	0.0990317	0.0824458	0.111405		1.06936	0.748466	0.906086	-0.904895	-0.941239	-0.877781
Bradi3g44930	3	83.2597	75.924	63.5604	44.3628	32.4239	35.5057		0.911893	0.763398	0.532824	0.38943	0.426446		1.27617	0.934756	0.35934	-0.534135	-1.08978	-0.946348
Bradi3g45160	3	63.1206	49.4415	34.9266	21.6311	7.34901	13.8359		0.783286	0.553332	0.342694	0.116428	0.219199		1.456	0.821773	0.148793	-0.467654	-1.12984	-0.829074
Bradi3g45180	3	186.359	214.474	153.359	114.378	59.9516	88.7521		1.15087	0.822923	0.613752	0.3217	0.476243		0.848152	1.32368	0.29001	-0.369293	-1.28983	-0.802717
Bradi3g45220	3	21.0765	17.9065	10.4136	10.2761	10.289	7.28553		0.849595	0.494085	0.487562	0.488174	0.345671		1.53195	0.939862	-0.459654	-0.485331	-0.482922	-1.04391
Bradi3g45250	3	38.9873	40.3768	2.53064	0.0964853	0.178456	0.12009		1.03564	0.0649094	0.00247479	0.00457729	0.00308023		1.25481	1.32381	-0.555321	-0.676181	-0.672111	-0.675009
Bradi3g45260	3	36.2511	27.9361	17.8746	6.48007	5.11345	7.74644		0.770628	0.493077	0.178755	0.141057	0.213689		1.50328	0.857323	0.0756878	-0.8095	-0.915667	-0.711121
Bradi3g45400	3	16.4106	14.7466	10.8687	7.48017	4.38072	5.813		0.8986	0.6623	0.455813	0.266944	0.354222		1.31975	0.979828	0.187683	-0.50452	-1.13766	-0.845081
Bradi3g45636	3	78.8196	80.886	63.6842	40.3005	19.2701	42.9057		1.02622	0.807974	0.5113	0.244483	0.544354		1.00917	1.09426	0.385954	-0.576902	-1.44286	-0.469628
Bradi3g45651	3	113.158	84.0091	89.9962	31.603	9.06866	68.3724		0.742402	0.795312	0.279281	0.0801413	0.604218		1.21237	0.462436	0.616469	-0.885836	-1.46559	0.0601446
Bradi3g45700	3	136.884	133.598	107.394	66.0258	24.3388	103.455		0.975998	0.784564	0.482349	0.177806	0.755785		0.964542	0.888366	0.280811	-0.678331	-1.64486	0.189475
Bradi3g46040	3	186.169	144.773	80.1625	43.0295	34.2029	1.61464		0.777643	0.430589	0.231131	0.183719	0.00867295		1.47625	0.891516	-0.0211339	-0.545651	-0.670329	-1.13065
Bradi3g46430	3	40.2149	52.3695	19.5632	19.072	26.5211	27.9489		1.30224	0.486466	0.474251	0.659485	0.694987		0.713241	1.64876	-0.876291	-0.914101	-0.34075	-0.23086
Bradi3g46650	3	7.14266	7.6387	5.70253	2.94193	2.05363	4.09408		1.06945	0.798376	0.411881	0.287516	0.573187		0.975406	1.19397	0.340862	-0.875499	-1.2669	-0.367843
Bradi3g46710	3	238.6	167.488	119.559	23.1427	16.5543	7.31916		0.701964	0.501089	0.0969937	0.0693813	0.0306755		1.50097	0.755375	0.252849	-0.758069	-0.827146	-0.923976
Bradi3g47010	3	87.3873	46.2048	22.4737	12.8621	4.05819	33.4941		0.528737	0.257174	0.147185	0.0464392	0.383284		1.77081	0.394164	-0.399118	-0.720415	-1.01471	-0.0307279
Bradi3g47232	3	152.85	159.365	86.9861	52.7023	52.2887	17.383		1.04262	0.569093	0.344797	0.342091	0.113726		1.13722	1.24961	0.000979094	-0.590459	-0.597594	-1.19976
Bradi3g47700	3	26.0801	21.2034	17.8142	10.6462	8.84334	17.0922		0.81301	0.683055	0.408211	0.339084	0.655373		1.41721	0.660511	0.13462	-0.977599	-1.25734	0.0225962
Bradi3g49270	3	20.083	23.8575	13.5939	1.03414	1.06776	0.548053		1.18794	0.676886	0.0514934	0.0531674	0.0272894		0.953163	1.31105	0.337864	-0.853059	-0.849872	-0.899151
Bradi3g49310	3	13.8675	11.3871	11.7	3.89078	1.68963	2.64013		0.821136	0.843701	0.280569	0.121842	0.190383		1.18233	0.719641	0.778013	-0.678697	-1.08929	-0.911991
Bradi3g49620	3	106.645	102.8	85.6482	69.7716	51.0862	81.9231		0.963953	0.803118	0.654245	0.479033	0.768188		1.14052	0.955256	0.128635	-0.636506	-1.53702	-0.050887
Bradi3g49730	3	31.8979	33.8083	17.1061	13.383	6.86496	15.1847		1.05989	0.536278	0.419559	0.215217	0.476041		1.13225	1.30969	-0.241616	-0.587418	-1.19282	-0.420081
Bradi3g50080	3	45.1404	28.09	22.807	12.8835	12.9446	17.505		0.622281	0.505247	0.285411	0.286763	0.38779		1.78973	0.397083	-0.034419	-0.84495	-0.839965	-0.467477
Bradi3g50420	3	6.43012	5.66872	6.86293	2.44477	1.18736	3.10772		0.88159	1.06731	0.380205	0.184656	0.483306		0.914783	0.590299	1.09923	-0.783659	-1.31953	-0.501129
Bradi3g50430	3	70.8066	55.6613	16.6964	10.3229	11.7838	7.18007		0.786103	0.235803	0.14579	0.166422	0.101404		1.53991	0.985468	-0.44096	-0.674281	-0.620801	-0.789333
Bradi3g50490	3	113.325	87.2756	62.3159	39.4314	25.4757	7.85369		0.770136	0.549887	0.34795	0.224802	0.0693023		1.4501	0.791767	0.160978	-0.417368	-0.770062	-1.21541
Bradi3g50570	3	16.3833	15.2373	14.0112	5.20846	2.9572	12.1113		0.930049	0.855213	0.317913	0.180501	0.739244		0.968154	0.76263	0.54275	-1.03591	-1.43964	0.202019
Bradi3g51570	3	29.7545	22.339	19.1761	11.594	10.6386	14.9043		0.750777	0.644477	0.389655	0.357545	0.50091		1.6109	0.588745	0.152776	-0.892339	-1.02403	-0.436043
Bradi3g51630	3	5.68688	6.58248	0.710144	0.112535	0.223866	0.0916585		1.15749	0.124874	0.0197886	0.0393653	0.0161175		1.13468	1.42904	-0.501048	-0.697467	-0.660876	-0.704329
Bradi3g51750	3	212.718	186.485	167.899	106.762	57.9223	134.069		0.876676	0.7893	0.501894	0.272296	0.630266		1.2096	0.745746	0.417104	-0.663905	-1.52748	-0.181065
Bradi3g52160	3	13.5709	16.4137	12.8932	3.85979	3.61435	7.52938		1.20949	0.950065	0.284418	0.266332	0.55482		0.725933	1.25187	0.600566	-1.07061	-1.11602	-0.391738
Bradi3g52307	3	53.5335	55.227	23.1821	30.7119	26.1234	5.3319		1.03164	0.433039	0.573695	0.487983	0.0995994		1.10793	1.19651	-0.479618	-0.0857671	-0.325768	-1.41328
Bradi3g52350	3	75.8344	77.1312	48.1638	18.9286	8.02127	28.4782		1.0171	0.635118	0.249604	0.105774	0.375532		1.13005	1.17436	0.184644	-0.814224	-1.18689	-0.487946
Bradi3g52390	3	49.9934	40.0236	36.1586	22.7283	8.62463	12.4585		0.800578	0.723268	0.454626	0.172515	0.249203		1.32377	0.714519	0.47833	-0.342388	-1.20426	-0.969971
Bradi3g52410	3	5.47337	6.64045	5.0176	2.79853	2.46144	3.34614		1.21323	0.91673	0.511299	0.449712	0.61135		0.709643	1.40928	0.436423	-0.89385	-1.09592	-0.565568
Bradi3g52505	3	175.87	153.584	99.7101	47.224	8.92469	17.4065		0.873277	0.566952	0.268516	0.0507458	0.0989734		1.30351	0.988027	0.225409	-0.517569	-1.05972	-0.939657
Bradi3g52530	3	76.1989	91.0177	80.675	56.8942	36.9828	56.2365		1.19448	1.05874	0.746654	0.485346	0.738022		0.49763	1.24517	0.723433	-0.476206	-1.48064	-0.509385
Bradi3g52690	3	54.8651	57.8829	33.0591	17.5584	7.43906	15.1746		1.055	0.602553	0.320029	0.135588	0.27658		1.11708	1.25832	0.0965312	-0.628922	-1.10252	-0.740491
Bradi3g52740	3	907.674	765.957	646.449	517.809	389.252	361.675		0.843868	0.712204	0.570479	0.428845	0.398463		1.43603	0.77857	0.224136	-0.37266	-0.969072	-1.09701
Bradi3g52760	3	25.4972	22.3645	13.7725	5.33785	2.90219	10.3359		0.877134	0.540158	0.20935	0.113824	0.405375		1.33708	0.991728	0.0445541	-0.885282	-1.15379	-0.334295
Bradi3g53030	3	7.25486	7.1006	4.25743	4.71092	2.93234	4.00478		0.978737	0.586838	0.649346	0.40419	0.552013		1.26061	1.17267	-0.448099	-0.189585	-1.20347	-0.592126
Bradi3g53320	3	76.9943	53.6729	49.913	11.1288	4.4234	8.92496		0.697103	0.648269	0.144541	0.0574509	0.115917		1.42486	0.648795	0.523677	-0.766953	-0.990091	-0.840292
Bradi3g53497	3	180.328	115.254	127.105	47.6234	22.7899	29.5835		0.639138	0.704853	0.264093	0.12638	0.164054		1.47065	0.443977	0.630941	-0.623049	-1.01485	-0.907669
Bradi3g53696	3	29.524	26.233	20.8788	19.8617	12.8323	19.0328		0.888532	0.707179	0.672731	0.43464	0.644656		1.39022	0.827484	-0.0880641	-0.261973	-1.46396	-0.40371
Bradi3g53780	3	17.3171	13.7297	8.26486	6.60881	7.77039	9.57556		0.79284	0.477266	0.381635	0.448712	0.552954		1.6394	0.771029	-0.551785	-0.952649	-0.671477	-0.234517
Bradi3g54010	3	9.22729	7.11034	8.45384	4.2431	4.74068	4.11368		0.770577	0.916179	0.459843	0.513768	0.445817		1.2946	0.353609	0.950804	-0.920889	-0.699712	-0.978416
Bradi3g54210	3	631.555	625.52	434.213	331.123	263.611	257.516		0.990445	0.68753	0.524298	0.4174	0.407749		1.21565	1.18032	0.0602456	-0.543329	-0.938599	-0.974287
Bradi3g54730	3	18.1204	15.1742	15.6082	6.75626	3.0293	7.08395		0.837411	0.861362	0.372854	0.167176	0.390938		1.17294	0.690188	0.761302	-0.689145	-1.29983	-0.635451
Bradi3g55090	3	197.045	159.751	100.131	38.8102	32.289	27.2716		0.810734	0.508163	0.196961	0.163866	0.138402		1.44153	0.927058	0.104586	-0.741346	-0.831307	-0.900524
Bradi3g55237	3	7.12019	8.51386	5.78659	4.53392	3.25273	5.38814		1.19573	0.812701	0.636768	0.456831	0.756741		0.726763	1.47465	0.0111007	-0.661131	-1.34867	-0.202721
Bradi3g55260	3	90.6365	77.1861	64.4318	50.3701	44.5907	54.4555		0.851601	0.710881	0.555738	0.491973	0.600812		1.54175	0.774412	0.0467812	-0.755434	-1.08515	-0.522365
Bradi3g55317	3	144.122	156.772	87.6451	36.7076	17.593	69.048		1.08778	0.608133	0.254699	0.122071	0.479096		1.04668	1.27185	0.04148	-0.865136	-1.20535	-0.289521
Bradi3g55350	3	51.0661	47.1633	46.2301	26.7612	20.3743	29.4558		0.923573	0.9053	0.52405	0.398979	0.576816		1.10779	0.80384	0.731167	-0.785079	-1.28249	-0.575227
Bradi3g55840	3	126.118	116.433	104.088	83.9864	51.4336	89.0629		0.923206	0.825324	0.665933	0.407821	0.706185		1.15843	0.795705	0.333372	-0.41949	-1.63865	-0.229365
Bradi3g55890	3	91.5628	76.6966	46.5024	15.7859	3.81414	11.077		0.837639	0.507874	0.172405	0.041656	0.120977		1.37615	0.972285	0.152021	-0.682434	-1.00766	-0.810356
Bradi3g56190	3	463.048	425.319	323.402	200.55	47.4083	170.209		0.91852	0.698419	0.433109	0.102383	0.367583		1.19361	0.958317	0.322711	-0.443449	-1.39852	-0.632675
Bradi3g56270	3	1674.91	1684.72	1213.04	903.598	393.935	1110.65		1.00585	0.724238	0.539489	0.235197	0.66311		1.04474	1.06476	0.10124	-0.530862	-1.57197	-0.107904
Bradi3g56720	3	56.7201	63.5444	37.8502	32.0732	31.3803	26.3464		1.12032	0.667316	0.565465	0.553249	0.464498		1.01479	1.46445	-0.228569	-0.609223	-0.654877	-0.986572
Bradi3g57400	3	127.108	110.433	104.554	44.957	63.0354	95.1773		0.868812	0.822565	0.353692	0.495921	0.748792		1.17123	0.632169	0.442138	-1.48448	-0.900057	0.139002
Bradi3g58140	3	61.4845	81.8908	61.2562	38.3013	24.1646	56.0813		1.33189	0.996287	0.622943	0.393019	0.912121		0.378487	1.39188	0.367151	-0.772817	-1.47486	0.110158
Bradi3g58338	3	108.258	97.49	21.0543	12.7349	13.4838	9.06416		0.900538	0.194484	0.117636	0.124553	0.0837278		1.39953	1.16617	-0.490367	-0.670667	-0.654439	-0.750222
Bradi3g58630	3	12.5308	9.16918	3.16551	0.337063	0.971594	0.409129		0.731729	0.252617	0.0268986	0.0775362	0.0326498		1.56143	0.91343	-0.243853	-0.789072	-0.666758	-0.77518
Bradi3g58830	3	59.4111	53.4814	44.5349	35.8283	24.4121	26.0928		0.900193	0.749606	0.603058	0.410902	0.439191		1.30842	0.89539	0.272222	-0.334238	-1.12943	-1.01236
Bradi3g58900	3	14.0998	10.8023	7.26817	0.90025	0.196466	0.395292		0.76613	0.515479	0.0638482	0.0139339	0.0280352		1.41307	0.864197	0.275938	-0.784004	-0.901149	-0.868054
Bradi3g58915	3	17.4728	12.6628	8.48043	5.86999	1.4009	1.13178		0.724716	0.485351	0.33595	0.0801763	0.0647739		1.49837	0.750458	0.100133	-0.305768	-1.00067	-1.04252
Bradi3g59440	3	137.048	134.675	81.1099	29.794	6.22207	23.1553		0.98268	0.591835	0.217398	0.0454006	0.168957		1.18429	1.14318	0.215493	-0.673247	-1.08149	-0.788222
Bradi3g59447	3	8.21687	9.88532	7.58999	3.8434	2.51046	4.02957		1.20305	0.923708	0.467744	0.305525	0.490402		0.749494	1.3168	0.536343	-0.737572	-1.19079	-0.674268
Bradi3g59607	3	6.28065	7.00196	5.95313	4.29461	2.89445	3.18106		1.11485	0.947852	0.683785	0.460852	0.506485		0.783341	1.20302	0.592777	-0.372195	-1.18685	-1.02009
Bradi3g59690	3	31.1849	33.311	3.3891	1.20601	1.15501	0.531112		1.06818	0.108678	0.038673	0.0370374	0.0170311		1.22051	1.35435	-0.529224	-0.666648	-0.669859	-0.709133
Bradi3g59710	3	8.49637	9.06801	8.56336	2.94224	2.06063	3.61869		1.06728	1.00788	0.346294	0.242531	0.42591		0.834774	1.0112	0.85545	-0.879369	-1.15145	-0.670598
Bradi3g59730	3	37.3671	36.1039	31.9343	15.8081	6.93359	7.64544		0.966195	0.854611	0.423049	0.185553	0.204604		1.04049	0.951294	0.656865	-0.481865	-1.10853	-1.05826
Bradi3g59780	3	57.4409	74.1641	33.9784	16.3846	16.5665	6.2815		1.29114	0.591536	0.285244	0.288409	0.109356		0.875225	1.50327	-0.0059199	-0.66666	-0.659831	-1.04609
Bradi3g60000	3	130.152	93.2349	85.6854	51.3645	35.7645	42.0968		0.716355	0.65835	0.394651	0.274791	0.323444		1.5662	0.553643	0.346576	-0.594784	-1.02266	-0.848978
Bradi3g60517	3	286.689	258.438	173.934	97.1355	43.6927	101.247		0.901457	0.6067	0.338818	0.152405	0.353161		1.30662	1.01481	0.14197	-0.651286	-1.2033	-0.608814
Bradi4g00300	3	148.432	139.721	100.967	50.0143	19.849	98.0779		0.941313	0.680225	0.33695	0.133724	0.660758		1.10984	0.935922	0.16219	-0.855099	-1.45736	0.104502
Bradi4g00330	3	226.777	293.844	223.635	145.166	95.4097	210.653		1.29574	0.986145	0.640126	0.420721	0.9289		0.396211	1.36147	0.350992	-0.778361	-1.49447	0.164154
Bradi4g00860	3	18.3483	18.7139	21.3125	9.79407	7.89618	12.3751		1.01993	1.16156	0.533787	0.43035	0.674455		0.6612	0.728195	1.20439	-0.906321	-1.2541	-0.433362
Bradi4g01130	3	2018.27	1791.67	1556.06	857.521	721.577	1216.38		0.887727	0.770989	0.424879	0.357523	0.602683		1.27165	0.833745	0.378422	-0.971536	-1.23425	-0.278032
Bradi4g01310	3	27.815	38.5814	17.7349	13.9104	11.5151	16.0362		1.38707	0.637603	0.500104	0.41399	0.576532		0.667859	1.71255	-0.310237	-0.681344	-0.913762	-0.475068
Bradi4g01360	3	33.4451	29.5186	21.8159	13.683	14.9027	23.7179		0.882598	0.652288	0.409119	0.445586	0.709159		1.35528	0.853147	-0.131889	-1.17193	-1.01596	0.111349
Bradi4g01450	3	26.7635	16.5056	11.8909	6.03202	3.58801	10.9308		0.616721	0.444297	0.225382	0.134064	0.408422		1.70657	0.468977	-0.0877756	-0.794647	-1.08951	-0.203616
Bradi4g01990	3	17.1836	17.3557	15.5837	3.52339	2.33289	6.6409		1.01002	0.906895	0.205044	0.135762	0.386467		0.958461	0.982912	0.731183	-0.982102	-1.15122	-0.53923
Bradi4g02420	3	10.6053	11.5486	8.78357	4.74501	4.13045	8.48214		1.08894	0.828221	0.447417	0.389469	0.799798		0.844757	1.15648	0.242699	-1.09196	-1.29506	0.14308
Bradi4g05250	3	242.587	284.41	93.3524	2.92663	2.50413	1.66965		1.1724	0.38482	0.0120642	0.0103226	0.00688268		1.07212	1.39702	-0.0871805	-0.789638	-0.79292	-0.799402
Bradi4g05500	3	21.9136	28.6985	20.2321	7.3993	6.84089	9.77153		1.30962	0.923269	0.337658	0.312176	0.445912		0.673636	1.42238	0.488079	-0.928087	-0.98971	-0.6663
Bradi4g06510	3	10.6604	8.78554	6.68397	3.0551	2.77228	6.46966		0.824128	0.62699	0.286584	0.260054	0.606886		1.36966	0.76628	0.089943	-1.07792	-1.16894	0.0209715
Bradi4g07310	3	31.0206	24.5324	18.6155	9.11935	6.13252	12.2546		0.790842	0.6001	0.293977	0.197692	0.395046		1.46958	0.792135	0.174332	-0.817181	-1.12904	-0.489827
Bradi4g07490	3	8.22946	6.71196	5.85626	1.48056	0.434212	0.665947		0.815601	0.711621	0.17991	0.0527632	0.0809223		1.26352	0.821015	0.571493	-0.704457	-1.00957	-0.941998
Bradi4g07902	3	14.0068	15.2992	14.2558	7.40026	5.53433	9.60565		1.09227	1.01778	0.528335	0.395118	0.685787		0.734256	1.05167	0.795423	-0.88824	-1.3465	-0.346614
Bradi4g08010	3	34.0033	20.6137	14.9015	5.00021	5.09546	1.31586		0.606226	0.438238	0.147051	0.149852	0.038698		1.65931	0.576318	0.114303	-0.686544	-0.67884	-0.984544
Bradi4g08020	3	3266.5	2961.22	2346.35	2149.57	1478.51	1519.88		0.906544	0.718308	0.658068	0.452629	0.465294		1.33825	0.921164	0.0810817	-0.187768	-1.10462	-1.0481
Bradi4g08470	3	56.661	82.2235	47.7877	16.4363	21.7119	28.8588		1.45115	0.843398	0.290081	0.383189	0.509324		0.577215	1.60322	0.22107	-1.03728	-0.825538	-0.538682
Bradi4g08500	3	8761.68	7773.47	5327.15	3514.86	835.868	3350.14		0.887213	0.608006	0.401163	0.0954005	0.382363		1.28989	0.957466	0.134543	-0.475099	-1.37629	-0.530509
Bradi4g08520	3	67.6481	62.3522	66.4252	33.5557	21.7418	36.3924		0.921713	0.981922	0.496033	0.321396	0.537967		0.990301	0.723115	0.928602	-0.729702	-1.32573	-0.586587
Bradi4g09120	3	40.6921	41.6145	20.9958	10.6278	2.14199	3.78659		1.02267	0.515967	0.261176	0.052639	0.0930546		1.17056	1.22268	0.0575986	-0.528255	-1.00776	-0.914826
Bradi4g09770	3	8.78823	7.71548	6.35267	3.73175	0.762142	1.62411		0.877933	0.722861	0.424631	0.0867231	0.184806		1.20092	0.875528	0.462152	-0.332845	-1.23361	-0.972149
Bradi4g09920	3	115.555	129.325	100.238	107.238	55.7249	95.649		1.11917	0.867449	0.928029	0.482238	0.827739		0.596724	1.147	-0.0153383	0.264393	-1.79407	-0.198704
Bradi4g10480	3	111.428	102.19	32.971	7.23588	6.71918	2.03814		0.917096	0.295895	0.0649375	0.0603005	0.018291		1.35025	1.16591	-0.215371	-0.72892	-0.739231	-0.832642
Bradi4g11030	3	93.2526	83.2137	64.7468	58.3672	33.2832	58.0559		0.892347	0.694316	0.625905	0.356914	0.622566		1.33113	0.855564	-0.0192534	-0.321467	-1.50975	-0.336216
Bradi4g11400	3	6.61764	7.40237	4.53693	3.38375	1.2082	4.35204		1.11858	0.685581	0.511323	0.182573	0.657643		0.910218	1.26136	-0.0208361	-0.536844	-1.51033	-0.103565
Bradi4g11420	3	129.496	90.4013	68.3293	45.1737	12.4634	35.4624		0.698103	0.527658	0.348844	0.096246	0.27385		1.56922	0.638885	0.113633	-0.437407	-1.21582	-0.668511
Bradi4g11540	3	23.9839	19.5062	11.5875	1.85065	0.450709	1.0769		0.813302	0.483137	0.0771621	0.0187921	0.0449007		1.38946	0.952584	0.179997	-0.769987	-0.906573	-0.845479
Bradi4g13978	3	8.73958	5.98988	7.37363	4.1237	2.99238	3.61106		0.685375	0.843706	0.471842	0.342394	0.413185		1.4333	0.227275	0.834195	-0.591242	-1.08744	-0.816088
Bradi4g14020	3	733.439	586.047	420.475	285.517	135.242	301.45		0.799039	0.573292	0.389286	0.184394	0.411008		1.47932	0.804431	0.0463064	-0.57164	-1.25973	-0.498689
Bradi4g14170	3	12.2846	12.7221	9.29448	5.67429	7.55264	9.37003		1.03562	0.756596	0.461903	0.614806	0.762747		1.03518	1.19685	-0.069668	-1.40733	-0.713281	-0.0417513
Bradi4g16050	3	29.3839	26.807	22.4949	20.1808	13.8766	16.9093		0.912304	0.765553	0.6868	0.472253	0.575462		1.32499	0.885859	0.151014	-0.243338	-1.31767	-0.800857
Bradi4g16510	3	340.893	245.998	217.287	150.321	92.0845	88.1223		0.721626	0.637406	0.440961	0.270127	0.258504		1.54607	0.57941	0.286953	-0.395207	-0.988433	-1.02879
Bradi4g17230	3	228.778	189.839	104.185	30.5257	12.2115	42.6168		0.829793	0.455398	0.133429	0.0533769	0.18628		1.41598	0.983254	0.0314033	-0.787161	-0.990684	-0.652796
Bradi4g18770	3	18.3921	12.683	10.0248	6.47969	4.88622	3.38292		0.689587	0.545062	0.352309	0.265669	0.183933		1.62068	0.602106	0.127869	-0.504621	-0.788913	-1.05712
Bradi4g19530	3	32.7152	29.4514	24.3426	7.31936	2.30169	6.03131		0.900237	0.744077	0.22373	0.0703553	0.184358		1.17855	0.933364	0.549576	-0.729261	-1.1062	-0.826023
Bradi4g19577	3	8.76847	9.20988	6.75775	1.70436	0.95441	2.46155		1.05034	0.770687	0.194374	0.108846	0.280728		1.02324	1.14234	0.480719	-0.882748	-1.08509	-0.678448
Bradi4g20160	3	48.9158	46.355	34.0854	29.1258	35.363	20.7682		0.947649	0.696816	0.595426	0.722936	0.42457		1.24555	1.00294	-0.159496	-0.629369	-0.0384489	-1.42117
Bradi4g20197	3	25.441	25.956	22.0179	9.6191	4.12421	6.19264		1.02024	0.865451	0.378095	0.162109	0.243412		0.987033	1.03847	0.645149	-0.593205	-1.14202	-0.935429
Bradi4g20480	3	13.0316	10.9792	8.4163	3.69896	1.62921	3.40843		0.842504	0.645836	0.283844	0.125019	0.26155		1.33557	0.891369	0.336689	-0.684266	-1.13221	-0.747146
Bradi4g21170	3	6091.34	5454.66	3593.07	2584.57	720.617	315.219		0.895478	0.589865	0.424303	0.118302	0.0517487		1.24369	0.976608	0.195687	-0.227366	-1.00928	-1.17934
Bradi4g22653	3	166.824	119.269	38.3107	4.24651	6.34118	4.88904		0.714941	0.229647	0.025455	0.0380112	0.0293065		1.57873	0.897319	-0.262738	-0.750845	-0.72083	-0.741638
Bradi4g22656	3	6.83591	7.53679	1.87855	0.305379	0.49469	0.622393		1.10253	0.274806	0.0446728	0.0723664	0.0910477		1.16529	1.37523	-0.319628	-0.790851	-0.734145	-0.695894
Bradi4g22760	3	334.208	301.623	242.613	208.648	174.148	153.443		0.9025	0.725932	0.624305	0.521077	0.459124		1.38141	0.924082	0.0958844	-0.380799	-0.864993	-1.15558
Bradi4g23193	3	8.39923	10.0264	4.6815	3.50906	2.85298	0		1.19372	0.557372	0.417783	0.339671	0		0.940866	1.37981	-0.0620523	-0.378337	-0.555325	-1.32496
Bradi4g23695	3	87.1547	72.9336	73.6229	59.6247	16.7433	57.9701		0.83683	0.844738	0.684125	0.19211	0.665141		1.06184	0.476847	0.505199	-0.0706231	-1.83458	-0.138686
Bradi4g23910	3	33.0348	33.9269	28.9011	15.6279	10.6036	17.3969		1.02701	0.874869	0.473073	0.320984	0.526622		0.98459	1.07435	0.568702	-0.766711	-1.2722	-0.588733
Bradi4g24040	3	7.68215	5.88989	5.33351	4.46928	3.40561	4.86253		0.766699	0.694273	0.581775	0.443314	0.632965		1.6627	0.425334	0.0412022	-0.55546	-1.28982	-0.28396
Bradi4g24367	3	8143.92	8648.82	5800.75	3009.69	1411.99	5385.08		1.062	0.71228	0.369562	0.173379	0.661239		0.971778	1.1506	0.141917	-0.846573	-1.41242	-0.0052996
Bradi4g24650	3	345.494	236.368	244.956	210.281	133.92	174.566		0.684145	0.709002	0.60864	0.387619	0.505265		1.67797	0.167531	0.286398	-0.193541	-1.25047	-0.687884
Bradi4g25120	3	245.655	244.401	231.529	155.92	116.924	194.655		0.994895	0.942495	0.63471	0.475969	0.79239		0.900299	0.876519	0.63241	-0.801428	-1.54093	-0.0668672
Bradi4g26170	3	18.4407	12.0906	10.6136	5.66246	2.31809	4.46766		0.655647	0.575554	0.307063	0.125705	0.242271		1.5955	0.529971	0.282138	-0.54865	-1.10982	-0.749133
Bradi4g26190	3	16.5039	16.6197	12.2193	2.28423	0.939772	10.13		1.00702	0.740393	0.138406	0.0569426	0.613795		0.985829	1.00283	0.357384	-1.09988	-1.29708	0.0509205
Bradi4g26240	3	39.1906	34.6334	30.3457	29.5933	19.3138	32.2517		0.883717	0.774309	0.755112	0.492817	0.822945		1.24952	0.563665	-0.0816337	-0.194865	-1.74191	0.205226
Bradi4g26830	3	20.1093	23.2885	15.4271	4.75926	2.74331	7.89807		1.1581	0.76716	0.23667	0.13642	0.392757		0.913181	1.28835	0.360645	-0.898228	-1.13612	-0.527826
Bradi4g27480	3	100.685	102.379	83.0511	48.1774	14.4963	28.6805		1.01682	0.824862	0.478497	0.143977	0.284854		1.00078	1.04566	0.533588	-0.390372	-1.28273	-0.906929
Bradi4g28160	3	218.682	214.017	182.537	139.208	68.2604	129.846		0.978665	0.834715	0.636577	0.312144	0.593766		1.03944	0.958505	0.412468	-0.339119	-1.56978	-0.501514
Bradi4g28260	3	56.019	43.9837	35.4641	19.3591	10.278	16.1546		0.785156	0.633073	0.345582	0.183473	0.288377		1.44459	0.770948	0.294096	-0.607326	-1.11561	-0.78669
Bradi4g28280	3	130.347	69.5924	58.8228	17.6908	12.5785	13.5448		0.533902	0.451279	0.135721	0.0965001	0.103913		1.72842	0.41445	0.181529	-0.708054	-0.818622	-0.797723
Bradi4g29060	3	18.8819	22.0119	17.1681	10.0337	10.998	8.89096		1.16576	0.909233	0.531392	0.582462	0.470871		0.779854	1.35856	0.462973	-0.856129	-0.677838	-1.06742
Bradi4g29080	3	56.2575	53.7972	33.3131	17.1045	16.6053	19.6746		0.956267	0.592154	0.304039	0.295167	0.349724		1.28309	1.14856	0.0284931	-0.857796	-0.885089	-0.717263
Bradi4g29290	3	12.2532	15.2028	14.2407	4.43663	2.20758	6.06179		1.24072	1.1622	0.362078	0.180163	0.494709		0.577689	1.11249	0.938049	-0.839578	-1.24374	-0.544912
Bradi4g29300	3	77.7221	59.7877	58.3655	44.8536	41.9694	37.8243		0.76925	0.750951	0.577102	0.539993	0.486661		1.63595	0.428635	0.332892	-0.576706	-0.770864	-1.04991
Bradi4g29530	3	38.0321	33.386	16.7769	4.93818	8.75691	3.14797		0.877838	0.441123	0.129842	0.23025	0.0827715		1.37471	1.06354	-0.0488574	-0.841748	-0.58599	-0.961646
Bradi4g29650	3	61.0764	56.219	47.6857	33.6555	13.5516	32.1453		0.92047	0.780755	0.551039	0.22188	0.526313		1.1506	0.876018	0.393639	-0.399478	-1.53593	-0.484849
Bradi4g29660	3	32.8428	38.739	30.5473	10.9839	14.5478	17.0955		1.17953	0.930107	0.334439	0.442953	0.520524		0.767681	1.28696	0.565518	-1.15742	-0.843552	-0.619181
Bradi4g29680	3	210.971	195.361	172.162	124.66	96.6513	162.743		0.92601	0.816046	0.59089	0.458127	0.7714		1.17424	0.811609	0.272666	-0.830841	-1.48152	0.0538508
Bradi4g29910	3	8.51988	6.68128	6.56989	5.30509	4.05006	4.29002		0.784199	0.771125	0.622671	0.475365	0.503531		1.54805	0.460525	0.39464	-0.353487	-1.09583	-0.953894
Bradi4g30437	3	7.62554	7.15234	6.13231	2.62194	1.58493	5.0795		0.937945	0.804181	0.343836	0.207845	0.666117		1.05628	0.863503	0.447951	-0.982156	-1.40463	0.0190422
Bradi4g30710	3	422.288	610.187	230.656	107.21	130.055	87.8587		1.44495	0.546204	0.253879	0.307976	0.208054		0.751983	1.64865	-0.162506	-0.7516	-0.642583	-0.843946
Bradi4g30920	3	19.01	13.8125	12.3741	8.66913	6.31155	12.4214		0.726589	0.650924	0.456029	0.332011	0.653411		1.57592	0.390591	0.0625587	-0.782377	-1.32004	0.0733417
Bradi4g30940	3	8.15362	7.38017	4.53038	1.5925	1.56139	1.99874		0.90514	0.555627	0.195312	0.191496	0.245136		1.32491	1.06553	0.109853	-0.875363	-0.885796	-0.739128
Bradi4g30950	3	26.5957	24.7855	19.1051	13.0088	9.43174	15.2081		0.931938	0.718352	0.489132	0.354634	0.571825		1.27162	1.00313	0.160574	-0.743654	-1.27422	-0.417447
Bradi4g31070	3	58.407	50.4482	40.5937	12.2837	9.76996	30.3462		0.863736	0.695015	0.210312	0.167274	0.519565		1.2442	0.844359	0.349276	-1.073	-1.19929	-0.16555
Bradi4g31130	3	32.8874	31.9513	24.1825	12.5115	6.28872	17.6311		0.971538	0.735314	0.380433	0.19122	0.536104		1.12077	1.03319	0.306311	-0.785689	-1.36792	-0.306675
Bradi4g31240	3	125.015	105.043	77.2144	37.2947	30.5954	16.79		0.840243	0.617639	0.298321	0.244733	0.134304		1.36015	0.905048	0.270912	-0.638738	-0.791395	-1.10598
Bradi4g31300	3	34.2486	29.074	23.9494	18.0428	13.6873	23.9569		0.848912	0.699282	0.52682	0.399645	0.699502		1.41189	0.710886	0.0166519	-0.783522	-1.37358	0.01767
Bradi4g31690	3	18.9288	19.5215	8.93119	5.0017	4.3462	2.7407		1.03131	0.471832	0.264238	0.229608	0.14479		1.20255	1.2816	-0.130761	-0.654811	-0.74223	-0.956346
Bradi4g31800	3	32.255	27.3335	19.9809	14.5242	9.38372	18.3516		0.847418	0.619467	0.450292	0.290923	0.568953		1.43074	0.841513	-0.0387801	-0.692091	-1.30753	-0.233852
Bradi4g32090	3	52.017	48.0924	45.68	28.2862	22.1018	22.1938		0.924552	0.878175	0.543787	0.424896	0.426664		1.14006	0.853648	0.677593	-0.591785	-1.04311	-1.0364
Bradi4g32680	3	12.9601	9.84275	8.18973	2.42836	2.22815	7.02738		0.759466	0.63192	0.187372	0.171924	0.542232		1.38897	0.64848	0.255826	-1.11272	-1.16028	-0.0202773
Bradi4g32698	3	123.97	98.9507	85.5696	43.3455	29.5712	50.1449		0.798182	0.690244	0.349645	0.238535	0.404492		1.42067	0.737711	0.372449	-0.780145	-1.15614	-0.594541
Bradi4g33323	3	442.326	309.529	207.403	183.862	98.5864	246.916		0.699775	0.468891	0.41567	0.222882	0.558221		1.64577	0.520494	-0.344884	-0.54436	-1.26695	-0.0100669
Bradi4g33490	3	58.1655	51.4541	28.335	5.421	1.06271	3.87312		0.884616	0.487144	0.0931997	0.0182704	0.0665879		1.31941	1.05466	0.142659	-0.761247	-0.933173	-0.822308
Bradi4g33640	3	5.72364	6.88196	5.00899	1.57592	1.36557	2.74611		1.20237	0.875141	0.275335	0.238584	0.479784		0.797684	1.29986	0.487856	-1.00051	-1.0917	-0.493186
Bradi4g33940	3	231.289	224.601	173.882	138.369	80.206	156.505		0.971084	0.751792	0.598249	0.346777	0.676661		1.12949	1.01112	0.11339	-0.51518	-1.54464	-0.194178
Bradi4g34000	3	43.3163	37.0714	24.14	23.3474	17.1873	23.93		0.85583	0.557296	0.538998	0.396787	0.552448		1.53559	0.902648	-0.407986	-0.488319	-1.11266	-0.429271
Bradi4g34005	3	7.01308	7.76319	6.18193	3.37767	2.25822	5.45717		1.10696	0.881486	0.481625	0.322001	0.778142		0.783614	1.13534	0.393895	-0.921	-1.44591	0.05406
Bradi4g34350	3	46.3857	42.5998	34.3675	29.0875	22.4961	23.2566		0.918381	0.740908	0.627079	0.484979	0.501374		1.34375	0.962774	0.134373	-0.39695	-1.06023	-0.98371
Bradi4g34410	3	48.3516	38.285	34.6594	26.2107	22.4097	25.5992		0.791804	0.716819	0.542086	0.463474	0.529439		1.61185	0.582662	0.211984	-0.65179	-1.0404	-0.714309
Bradi4g34420	3	162.782	156.397	112.533	36.9585	12.7696	30.6481		0.960776	0.691312	0.227043	0.0784462	0.188277		1.1573	1.06187	0.406298	-0.723212	-1.08473	-0.817525
Bradi4g35270	3	266.599	256.028	192.06	153.724	82.3872	100.776		0.960348	0.720409	0.576613	0.309031	0.378006		1.18339	1.04642	0.217639	-0.279054	-1.20332	-0.965073
Bradi4g35310	3	532.439	413.599	221.293	192.664	115.217	215.514		0.776801	0.41562	0.361852	0.216395	0.404767		1.59202	0.837203	-0.384236	-0.566069	-1.05798	-0.42094
Bradi4g35317	3	131.182	144.493	111.254	17.407	8.83418	3.90862		1.10147	0.848084	0.132693	0.0673427	0.0297953		0.932492	1.13377	0.631152	-0.787892	-0.91752	-0.991999
Bradi4g35370	3	16.6336	14.3927	4.74097	2.13922	1.62485	1.5472		0.86528	0.285023	0.128608	0.0976849	0.0930166		1.4286	1.10151	-0.307327	-0.687096	-0.762176	-0.77351
Bradi4g35390	3	54.8509	52.7799	36.4129	29.1606	28.3484	22.4323		0.962242	0.663851	0.531633	0.516827	0.408969		1.29451	1.14148	-0.0678265	-0.603676	-0.663681	-1.10081
Bradi4g35680	3	59.7334	62.4214	54.3071	21.0222	14.8176	26.6837		1.045	0.909158	0.351934	0.248063	0.446714		0.934424	1.06063	0.679659	-0.883072	-1.17438	-0.617262
Bradi4g35770	3	14.0715	8.8236	1.35291	0.257519	0.195417	0.136882		0.627054	0.096145	0.0183007	0.0138874	0.00972758		1.67881	0.79174	-0.471048	-0.656203	-0.6667	-0.676595
Bradi4g36137	3	30.0385	43.6604	14.7796	6.28843	6.15505	5.89632		1.45348	0.492022	0.209346	0.204905	0.196292		0.777741	1.64361	-0.192185	-0.731922	-0.740401	-0.756847
Bradi4g36220	3	164.884	156.48	120.512	79.8393	20.308	64.2358		0.949031	0.730889	0.484216	0.123166	0.389582		1.13387	0.984606	0.34578	-0.376598	-1.43393	-0.65373
Bradi4g36240	3	38.5867	39.7714	27.9273	15.0374	9.2955	14.7355		1.0307	0.723756	0.389704	0.240899	0.381881		1.09565	1.18604	0.282416	-0.701003	-1.13907	-0.724033
Bradi4g36761	3	19.4128	16.2081	10.6052	3.8436	5.26991	4.62057		0.834918	0.546298	0.197993	0.271465	0.238016		1.43074	0.943968	0.0929311	-0.9341	-0.717454	-0.816084
Bradi4g36916	3	9.82285	6.22801	7.81255	6.33593	4.55119	6.07267		0.634032	0.795344	0.645019	0.463326	0.618219		1.6725	-0.319023	0.558803	-0.259234	-1.24797	-0.405076
Bradi4g37350	3	373.737	373.326	325.488	223.842	171.69	230.887		0.9989	0.870901	0.598931	0.459389	0.61778		1.05574	1.05095	0.49335	-0.691424	-1.29931	-0.609311
Bradi4g37450	3	120.528	118.549	75.0129	19.4721	18.591	9.75849		0.98358	0.622371	0.161557	0.154247	0.0809646		1.17192	1.1334	0.286014	-0.79504	-0.812188	-0.984106
Bradi4g37770	3	74.564	68.3073	49.5004	41.8771	28.206	48.6451		0.916089	0.663864	0.561626	0.378279	0.652394		1.32876	0.962743	-0.13745	-0.583408	-1.38316	-0.187482
Bradi4g37856	3	19.5294	16.3904	14.2566	5.43619	0.998753	1.81938		0.839268	0.730011	0.27836	0.0511411	0.0931612		1.22746	0.833934	0.566434	-0.539363	-1.09567	-0.992793
Bradi4g38140	3	32.7806	40.9819	28.0723	21.112	13.413	28.0795		1.25019	0.856368	0.64404	0.409175	0.856589		0.566785	1.43175	0.070211	-0.663867	-1.47586	0.070975
Bradi4g39870	3	11.3822	12.3493	8.82339	6.42978	4.06018	7.74193		1.08497	0.775195	0.564899	0.356714	0.680181		0.943718	1.25653	0.116097	-0.658108	-1.42454	-0.233699
Bradi4g40580	3	16.0432	9.83096	5.86852	2.47745	1.04611	2.97448		0.612779	0.365794	0.154423	0.0652055	0.185404		1.70499	0.609633	-0.0890321	-0.686952	-0.939328	-0.599314
Bradi4g40780	3	1604.09	1077.37	850.044	605.42	487.086	705.035		0.671639	0.529923	0.377423	0.303653	0.439524		1.76338	0.466007	-0.0939174	-0.696453	-0.987923	-0.45109
Bradi4g41527	3	83.8087	76.1085	52.0862	14.3944	6.54264	44.4188		0.908122	0.621489	0.171753	0.0780663	0.530002		1.19673	0.951534	0.186589	-1.01363	-1.26366	-0.0575637
Bradi4g41850	3	1051.59	816.682	582.429	462.477	237.602	590.536		0.776615	0.553855	0.439788	0.225945	0.561565		1.51676	0.684355	-0.145722	-0.570775	-1.36762	-0.116994
Bradi4g41910	3	24.3065	19.3618	17.783	14.1987	9.7233	17.7137		0.796568	0.731615	0.584152	0.400029	0.728763		1.45032	0.443849	0.122499	-0.607059	-1.51799	0.108391
Bradi4g41990	3	82.7921	72.1416	79.3698	49.0574	38.213	57.4943		0.871359	0.958664	0.592538	0.461554	0.694442		1.10262	0.503893	0.910231	-0.793799	-1.40343	-0.319515
Bradi4g43050	3	20.0215	24.609	2.6132	2.02516	2.16713	2.47987		1.22913	0.13052	0.101149	0.108241	0.12386		1.05822	1.49813	-0.611101	-0.66749	-0.653875	-0.623886
Bradi4g43211	3	69.3408	68.8125	52.2315	21.7727	22.2952	15.9954		0.992381	0.753258	0.313996	0.321531	0.230678		1.1185	1.09709	0.425126	-0.809253	-0.788079	-1.04339
Bradi4g43510	3	59.9244	44.6283	36.4068	24.9558	12.1231	11.319		0.744742	0.607544	0.416454	0.202307	0.188887		1.48269	0.683127	0.253373	-0.345193	-1.01598	-1.05802
Bradi4g44178	3	8.80269	8.53489	7.17764	3.00799	4.27123	6.63319		0.969577	0.815391	0.341712	0.485219	0.753541		1.03146	0.916269	0.332494	-1.46094	-0.917598	0.0983194
Bradi4g44227	3	23.4627	25.4617	20.8066	13.1588	6.26774	13.228		1.0852	0.886793	0.560838	0.267136	0.563788		0.86752	1.13854	0.507395	-0.529512	-1.46382	-0.520129
Bradi4g44290	3	62.475	48.9773	40.5093	27.4666	24.4958	41.4817		0.783949	0.648408	0.439642	0.392089	0.663972		1.5404	0.576653	-0.0279614	-0.959218	-1.17134	0.0414635
Bradi4g44390	3	107.974	87.371	45.023	22.3799	5.84563	51.3084		0.809185	0.41698	0.207271	0.0541392	0.475192		1.41782	0.883371	-0.215149	-0.802518	-1.23142	-0.0521034
Bradi4g44440	3	26.958	45.9732	9.32489	0.932443	0.976102	0.442486		1.70536	0.345904	0.0345887	0.0362082	0.0164139		0.689957	1.7104	-0.256318	-0.706695	-0.704352	-0.732988
Bradi4g45037	3	56.1531	48.9869	34.6765	16.0151	11.807	28.272		0.872382	0.617535	0.285205	0.210265	0.50348		1.33319	0.926665	0.114859	-0.943769	-1.18249	-0.248458
Bradi5g00750	3	6.73045	3.86787	5.10512	0.772847	0.387839	1.83544		0.574682	0.758511	0.114828	0.0576245	0.272707		1.42496	0.296232	0.784085	-0.924152	-1.07596	-0.505165
Bradi5g00980	3	48.6298	24.8734	19.8288	11.0977	2.18198	20.5374		0.511485	0.40775	0.228208	0.0448691	0.422321		1.74802	0.234563	-0.0868147	-0.643049	-1.21104	-0.0416716
Bradi5g01737	3	105.2	88.145	58.1718	56.127	22.214	36.1941		0.837882	0.552965	0.533528	0.21116	0.344051		1.42008	0.872026	-0.0911622	-0.15687	-1.24666	-0.797413
Bradi5g01850	3	8.8253	6.82222	7.14109	6.49811	3.91169	6.15033		0.77303	0.809161	0.736304	0.443236	0.696897		1.42126	0.16556	0.365452	-0.0376244	-1.659	-0.255641
Bradi5g01872	3	13.2989	12.8991	10.3766	5.04946	3.32841	6.93959		0.969932	0.780255	0.379689	0.250276	0.521815		1.11573	1.01979	0.414573	-0.863555	-1.27648	-0.410059
Bradi5g01900	3	43.4356	43.2585	43.7484	24.7167	19.3437	26.9365		0.995923	1.0072	0.569043	0.445341	0.620146		0.885977	0.870067	0.914071	-0.795613	-1.27829	-0.596208
Bradi5g02290	3	30.7429	33.3398	20.67	10.1945	13.9131	20.8947		1.08447	0.672351	0.331605	0.452564	0.679659		1.00443	1.29053	-0.105302	-1.25939	-0.849711	-0.0805515
Bradi5g02520	3	27.8224	31.5136	22.1809	17.7695	12.4636	24.1105		1.13267	0.797233	0.638674	0.44797	0.866585		0.755029	1.29316	-0.0674236	-0.71056	-1.48408	0.21388
Bradi5g02920	3	20.2231	16.7724	10.3347	8.71412	1.31132	9.16053		0.82937	0.511035	0.430899	0.0648427	0.452973		1.37352	0.854803	-0.112942	-0.356556	-1.46938	-0.289451
Bradi5g04560	3	17.3122	13.3193	4.23894	3.97117	3.42375	3.50149		0.769361	0.244853	0.229386	0.197766	0.202256		1.58894	0.933821	-0.556021	-0.599955	-0.689771	-0.677016
Bradi5g05100	3	10.4991	7.77886	5.50931	3.55398	3.3373	5.70554		0.740907	0.524741	0.338503	0.317865	0.54343		1.63519	0.632253	-0.204516	-0.925435	-1.00532	-0.13217
Bradi5g05166	3	25.4436	19.2965	20.0246	13.5772	9.39878	14.6893		0.758403	0.787019	0.53362	0.369397	0.57733		1.47757	0.392663	0.521162	-0.616741	-1.35419	-0.420458
Bradi5g06377	3	72.9457	73.2158	67.2889	53.3604	34.0279	54.6822		1.0037	0.922452	0.731508	0.466482	0.749629		0.90721	0.925102	0.532406	-0.39046	-1.67138	-0.30288
Bradi5g07360	3	286.327	302.942	205.497	168.388	122.549	224.1		1.05803	0.7177	0.588097	0.428002	0.782671		0.98914	1.23073	-0.186169	-0.725748	-1.39228	0.0843274
Bradi5g08240	3	16.8112	11.399	4.8206	5.15824	2.07123	6.06248		0.678064	0.28675	0.306834	0.123205	0.360622		1.68341	0.681196	-0.536993	-0.474469	-1.04612	-0.307024
Bradi5g08490	3	10.7401	7.40835	6.37117	2.75072	0.92424	0.955209		0.689782	0.593212	0.256116	0.0860549	0.0889384		1.48406	0.643409	0.381715	-0.531769	-0.992614	-0.9848
Bradi5g08650	3	7.49734	7.00727	3.47121	0.305561	0.180555	0.0602719		0.934635	0.462992	0.040756	0.0240826	0.00803912		1.26985	1.12874	0.110614	-0.800862	-0.836854	-0.871487
Bradi5g08820	3	99.6729	120.254	85.5539	27.8954	7.79019	25.5983		1.20648	0.858346	0.27987	0.0781576	0.256823		0.829756	1.27279	0.52582	-0.715374	-1.14817	-0.764823
Bradi5g08907	3	48.2998	43.9158	33.2985	12.2014	6.92175	12.9557		0.909234	0.689413	0.252618	0.143308	0.268235		1.23344	0.988031	0.393694	-0.787282	-1.08283	-0.745055
Bradi5g09170	3	592.211	666.982	565.559	161.716	83.1519	282.58		1.12626	0.954996	0.273071	0.140409	0.477161		0.808889	1.11103	0.701192	-0.930679	-1.24814	-0.442285
Bradi5g09491	3	20.9661	16.971	13.0843	11.1745	10.3541	14.0061		0.809448	0.624068	0.532981	0.493849	0.668039		1.65184	0.642784	-0.338889	-0.821237	-1.02846	-0.106045
Bradi5g09610	3	6.73248	6.84245	6.3122	2.87967	2.85551	2.62558		1.01633	0.937575	0.427728	0.424139	0.389987		0.957793	1.00982	0.758959	-0.864977	-0.876408	-0.985189
Bradi5g09650	3	339.32	313.282	278.711	186.254	79.7653	175.699		0.923263	0.82138	0.548904	0.235074	0.517796		1.11965	0.855769	0.505417	-0.431559	-1.51074	-0.538532
Bradi5g09670	3	47.1402	40.1348	23.7366	6.23997	7.8016	12.7882		0.851393	0.503531	0.13237	0.165498	0.271279		1.3985	0.993106	0.0441545	-0.968356	-0.877986	-0.589419
Bradi5g09702	3	25.7936	20.8918	14.7532	9.38356	7.51406	9.10398		0.809961	0.571971	0.363795	0.291315	0.352956		1.51978	0.855828	0.0243572	-0.702956	-0.95618	-0.740825
Bradi5g10017	3	11.7868	10.5656	10.3721	3.10291	1.73639	6.48399		0.896393	0.879978	0.263252	0.147316	0.550105		1.05098	0.762271	0.716532	-1.00202	-1.32508	-0.202682
Bradi5g10421	3	34.8046	46.0774	32.8036	17.5614	16.8856	23.0204		1.32389	0.942509	0.504573	0.485153	0.661419		0.549948	1.53727	0.374697	-0.96028	-1.01948	-0.48216
Bradi5g10426	3	29.4507	28.7387	25.4957	11.483	9.13481	16.612		0.975825	0.865708	0.389905	0.310173	0.56406		1.04242	0.962604	0.599029	-0.971938	-1.23519	-0.396928
[truncated: 4,042 more rows]
