# Supplementary material for: Time-series transcriptome of Brachypodium distachyon during bacterial flagellin-induced pattern-triggered immunity
Source: Front Plant Sci. 2022 Sep 15;13:1004184. doi: 10.3389/fpls.2022.1004184 (PMC9521188; doi:10.3389/fpls.2022.1004184)
Supplement: Supplementary Table 6.2 — Gene ontology (GO) enrichment analysis for cluster 2 of DEGs of Brachypodium distachyon during PTI (0, 0.5, 1, 3, 6, and 12 h) in response to flg22. [file Table_6.xlsx]

## Sheet: TableS6-1
Supplementary Table S6-1. Gene ontology (GO) enrichment analysis for cluster 1 of DEGs of Brachypodium distachyon during PTI (0, 0.5, 1, 3, 6, and 12 h) in response to flg22
GO term	Ontology	Description	Number in input list	Number in BG/Ref	p-value	FDR
GO:1901700	P	response to oxygen-containing compound	56	1557	9.5e-17	1.7e-13
GO:0042221	P	response to chemical	76	2853	1.2e-15	1e-12
GO:0009719	P	response to endogenous stimulus	56	1732	8e-15	4.8e-12
GO:0001101	P	response to acid chemical	45	1181	2.2e-14	9.8e-12
GO:0010033	P	response to organic substance	60	2023	3e-14	1.1e-11
GO:0050896	P	response to stimulus	115	6250	1.3e-12	3.9e-10
GO:0006950	P	response to stress	79	3506	1.8e-12	4.5e-10
GO:0010200	P	response to chitin	16	134	2e-12	4.5e-10
GO:0010243	P	response to organonitrogen compound	17	166	3.9e-12	7.8e-10
GO:0009725	P	response to hormone	48	1631	2.3e-11	4.1e-09
GO:0050794	P	regulation of cellular process	94	4857	3.4e-11	5.5e-09
GO:1901698	P	response to nitrogen compound	19	264	6.3e-11	9.5e-09
GO:0050789	P	regulation of biological process	98	5306	1.4e-10	2e-08
GO:2001141	P	regulation of RNA biosynthetic process	59	2445	2e-10	2.1e-08
GO:0006355	P	regulation of transcription, DNA-templated	59	2443	1.9e-10	2.1e-08
GO:1903506	P	regulation of nucleic acid-templated transcription	59	2445	2e-10	2.1e-08
GO:0031323	P	regulation of cellular metabolic process	67	2980	1.6e-10	2.1e-08
GO:0051252	P	regulation of RNA metabolic process	59	2474	3.1e-10	3e-08
GO:0080090	P	regulation of primary metabolic process	65	2889	3.2e-10	3.1e-08
GO:0009755	P	hormone-mediated signaling pathway	31	821	4.3e-10	3.8e-08
GO:0032870	P	cellular response to hormone stimulus	32	879	5.2e-10	4.5e-08
GO:0019219	P	regulation of nucleobase-containing compound metabolic process	59	2529	7e-10	5.5e-08
GO:0071495	P	cellular response to endogenous stimulus	32	890	7e-10	5.5e-08
GO:0019222	P	regulation of metabolic process	68	3181	9.5e-10	7.1e-08
GO:0097659	P	nucleic acid-templated transcription	59	2561	1.1e-09	7.7e-08
GO:0006351	P	transcription, DNA-templated	59	2559	1.1e-09	7.7e-08
GO:0032774	P	RNA biosynthetic process	59	2566	1.2e-09	7.9e-08
GO:0060255	P	regulation of macromolecule metabolic process	65	2998	1.4e-09	9.1e-08
GO:0034654	P	nucleobase-containing compound biosynthetic process	61	2781	3.4e-09	2.1e-07
GO:2000112	P	regulation of cellular macromolecule biosynthetic process	59	2657	4.3e-09	2.6e-07
GO:0010556	P	regulation of macromolecule biosynthetic process	59	2666	4.8e-09	2.7e-07
GO:0071310	P	cellular response to organic substance	33	1023	5.1e-09	2.7e-07
GO:0018130	P	heterocycle biosynthetic process	63	2957	5.4e-09	2.7e-07
GO:0031326	P	regulation of cellular biosynthetic process	60	2734	4.7e-09	2.7e-07
GO:0010468	P	regulation of gene expression	61	2814	5.3e-09	2.7e-07
GO:0051171	P	regulation of nitrogen compound metabolic process	60	2739	5e-09	2.7e-07
GO:0009889	P	regulation of biosynthetic process	60	2752	6e-09	2.9e-07
GO:0019438	P	aromatic compound biosynthetic process	64	3058	7.7e-09	3.6e-07
GO:0065007	P	biological regulation	102	6062	9e-09	4.1e-07
GO:0070887	P	cellular response to chemical stimulus	35	1176	1.2e-08	5.4e-07
GO:0009723	P	response to ethylene	17	307	2.6e-08	1.2e-06
GO:1901362	P	organic cyclic compound biosynthetic process	64	3174	3.1e-08	1.3e-06
GO:0009873	P	ethylene-activated signaling pathway	13	185	9.1e-08	3.8e-06
GO:0033993	P	response to lipid	26	772	1.1e-07	4.3e-06
GO:0009737	P	response to abscisic acid	22	578	1.5e-07	5.8e-06
GO:0071229	P	cellular response to acid chemical	20	485	1.6e-07	6.3e-06
GO:0097305	P	response to alcohol	22	583	1.7e-07	6.4e-06
GO:0071369	P	cellular response to ethylene stimulus	13	206	2.9e-07	1.1e-05
GO:0048583	P	regulation of response to stimulus	21	565	4.1e-07	1.5e-05
GO:0010150	P	leaf senescence	10	114	4.3e-07	1.5e-05
GO:0010260	P	organ senescence	10	114	4.3e-07	1.5e-05
GO:0007165	P	signal transduction	44	1965	4.6e-07	1.6e-05
GO:0009611	P	response to wounding	13	217	5.1e-07	1.7e-05
GO:0044700	P	single organism signaling	44	1995	6.8e-07	2.3e-05
GO:0023052	P	signaling	44	1997	7e-07	2.3e-05
GO:0000160	P	phosphorelay signal transduction system	13	225	7.5e-07	2.4e-05
GO:0007154	P	cell communication	47	2223	8.6e-07	2.7e-05
GO:0051716	P	cellular response to stimulus	55	2856	1.5e-06	4.7e-05
GO:0016070	P	RNA metabolic process	62	3403	1.7e-06	5.3e-05
GO:0009751	P	response to salicylic acid	12	209	2.1e-06	6.4e-05
GO:0009628	P	response to abiotic stimulus	43	2022	2.3e-06	6.9e-05
GO:0006952	P	defense response	36	1566	3.2e-06	9.3e-05
GO:0009753	P	response to jasmonic acid	12	225	4.4e-06	0.00012
GO:1903507	P	negative regulation of nucleic acid-templated transcription	12	231	5.7e-06	0.00016
GO:1902679	P	negative regulation of RNA biosynthetic process	12	231	5.7e-06	0.00016
GO:0051253	P	negative regulation of RNA metabolic process	12	232	5.9e-06	0.00016
GO:1901701	P	cellular response to oxygen-containing compound	20	635	8.6e-06	0.00023
GO:0045934	P	negative regulation of nucleobase-containing compound metabolic process	12	249	1.2e-05	0.00031
GO:0043161	P	proteasome-mediated ubiquitin-dependent protein catabolic process	10	170	1.2e-05	0.00032
GO:0009617	P	response to bacterium	16	441	1.3e-05	0.00034
GO:0010498	P	proteasomal protein catabolic process	10	172	1.4e-05	0.00034
GO:0032446	P	protein modification by small protein conjugation	18	550	1.5e-05	0.00037
GO:0009414	P	response to water deprivation	14	347	1.5e-05	0.00037
GO:0007568	P	aging	10	174	1.5e-05	0.00037
GO:0009415	P	response to water	14	355	1.9e-05	0.00046
GO:0048522	P	positive regulation of cellular process	20	676	2.1e-05	0.00049
GO:0071215	P	cellular response to abscisic acid stimulus	12	267	2.3e-05	0.00052
GO:0097306	P	cellular response to alcohol	12	267	2.3e-05	0.00052
GO:0044260	P	cellular macromolecule metabolic process	105	7410	2.5e-05	0.00057
GO:0080134	P	regulation of response to stress	13	316	2.5e-05	0.00057
GO:0006970	P	response to osmotic stress	19	636	2.9e-05	0.00065
GO:0016567	P	protein ubiquitination	17	526	3e-05	0.00066
GO:0006139	P	nucleobase-containing compound metabolic process	67	4178	4.1e-05	0.00088
GO:0090304	P	nucleic acid metabolic process	62	3768	4.1e-05	0.00088
GO:0046483	P	heterocycle metabolic process	70	4433	4.2e-05	0.00089
GO:0009738	P	abscisic acid-activated signaling pathway	11	243	4.7e-05	0.00097
GO:0035556	P	intracellular signal transduction	19	660	4.7e-05	0.00098
GO:0048519	P	negative regulation of biological process	22	848	5.5e-05	0.0011
GO:0070647	P	protein modification by small protein conjugation or removal	18	610	5.5e-05	0.0011
GO:0048585	P	negative regulation of response to stimulus	9	169	7e-05	0.0014
GO:0010035	P	response to inorganic substance	23	926	7e-05	0.0014
GO:0006725	P	cellular aromatic compound metabolic process	71	4588	7e-05	0.0014
GO:0044271	P	cellular nitrogen compound biosynthetic process	69	4436	7.8e-05	0.0015
GO:0009651	P	response to salt stress	17	574	8.5e-05	0.0016
GO:0071396	P	cellular response to lipid	14	409	8.5e-05	0.0016
GO:0031324	P	negative regulation of cellular metabolic process	14	412	9.1e-05	0.0017
GO:0048518	P	positive regulation of biological process	22	881	9.4e-05	0.0017
GO:0043170	P	macromolecule metabolic process	110	8111	9.9e-05	0.0018
GO:1901360	P	organic cyclic compound metabolic process	71	4700	0.00015	0.0027
GO:0031347	P	regulation of defense response	10	233	0.00016	0.0028
GO:0010558	P	negative regulation of macromolecule biosynthetic process	12	339	0.0002	0.0036
GO:0044237	P	cellular metabolic process	127	9879	0.00023	0.004
GO:0014070	P	response to organic cyclic compound	13	405	0.00028	0.0048
GO:0044699	P	single-organism process	122	9448	0.00028	0.0049
GO:0042742	P	defense response to bacterium	12	354	0.00029	0.005
GO:0031327	P	negative regulation of cellular biosynthetic process	12	355	0.0003	0.0051
GO:0051172	P	negative regulation of nitrogen compound metabolic process	12	356	0.00031	0.0052
GO:0009890	P	negative regulation of biosynthetic process	12	360	0.00034	0.0056
GO:0036211	P	protein modification process	38	2126	0.00035	0.0057
GO:0006464	P	cellular protein modification process	38	2126	0.00035	0.0057
GO:0048523	P	negative regulation of cellular process	16	594	0.00038	0.0062
GO:0045892	P	negative regulation of transcription, DNA-templated	9	215	0.00039	0.0063
GO:0048513	P	animal organ development	13	422	0.0004	0.0064
GO:0010605	P	negative regulation of macromolecule metabolic process	14	480	0.00041	0.0065
GO:0010604	P	positive regulation of macromolecule metabolic process	14	482	0.00043	0.0067
GO:0010557	P	positive regulation of macromolecule biosynthetic process	12	373	0.00046	0.0071
GO:0006511	P	ubiquitin-dependent protein catabolic process	12	376	0.00049	0.0076
GO:0051239	P	regulation of multicellular organismal process	14	490	0.0005	0.0076
GO:0044763	P	single-organism cellular process	90	6591	0.00051	0.0076
GO:0019941	P	modification-dependent protein catabolic process	12	378	0.00052	0.0077
GO:0051603	P	proteolysis involved in cellular protein catabolic process	13	435	0.00053	0.0079
GO:0043632	P	modification-dependent macromolecule catabolic process	12	380	0.00054	0.0079
GO:0031325	P	positive regulation of cellular metabolic process	14	495	0.00056	0.0081
GO:0008152	P	metabolic process	147	12035	0.00057	0.0082
GO:0048580	P	regulation of post-embryonic development	11	329	0.00058	0.0083
GO:0009266	P	response to temperature stimulus	15	559	0.0006	0.0086
GO:2000026	P	regulation of multicellular organismal development	13	442	0.00061	0.0086
GO:0044257	P	cellular protein catabolic process	13	444	0.00064	0.0089
GO:0031328	P	positive regulation of cellular biosynthetic process	12	396	0.00077	0.011
GO:0009892	P	negative regulation of metabolic process	14	521	0.0009	0.012
GO:0008219	P	cell death	8	194	0.0009	0.012
GO:0010467	P	gene expression	68	4747	0.00094	0.013
GO:0030163	P	protein catabolic process	13	467	0.001	0.013
GO:0009891	P	positive regulation of biosynthetic process	12	409	0.001	0.013
GO:0009987	P	cellular process	153	12771	0.001	0.013
GO:0048366	P	leaf development	11	356	0.0011	0.014
GO:0009059	P	macromolecule biosynthetic process	65	4511	0.0011	0.014
GO:0009893	P	positive regulation of metabolic process	14	535	0.0011	0.015
GO:0044265	P	cellular macromolecule catabolic process	14	541	0.0013	0.016
GO:0034645	P	cellular macromolecule biosynthetic process	64	4455	0.0013	0.016
GO:0044238	P	primary metabolic process	123	9890	0.0013	0.017
GO:0051338	P	regulation of transferase activity	5	78	0.0014	0.017
GO:0009416	P	response to light stimulus	17	744	0.0015	0.019
GO:0050790	P	regulation of catalytic activity	8	213	0.0016	0.02
GO:0045935	P	positive regulation of nucleobase-containing compound metabolic process	11	379	0.0018	0.022
GO:0009867	P	jasmonic acid mediated signaling pathway	5	84	0.0019	0.023
GO:0009607	P	response to biotic stimulus	24	1253	0.0019	0.023
GO:0019220	P	regulation of phosphate metabolic process	5	85	0.002	0.023
GO:0009409	P	response to cold	11	384	0.0019	0.023
GO:0051174	P	regulation of phosphorus metabolic process	5	85	0.002	0.023
GO:0044249	P	cellular biosynthetic process	79	5870	0.002	0.023
GO:0071704	P	organic substance metabolic process	130	10672	0.002	0.023
GO:0071395	P	cellular response to jasmonic acid stimulus	5	87	0.0022	0.025
GO:0009314	P	response to radiation	17	772	0.0022	0.025
GO:0009966	P	regulation of signal transduction	8	227	0.0023	0.027
GO:0043412	P	macromolecule modification	40	2532	0.0025	0.028
GO:0051707	P	response to other organism	23	1210	0.0026	0.029
GO:0023051	P	regulation of signaling	8	231	0.0026	0.029
GO:0043207	P	response to external biotic stimulus	23	1212	0.0026	0.029
GO:0051173	P	positive regulation of nitrogen compound metabolic process	11	399	0.0026	0.029
GO:0010646	P	regulation of cell communication	8	234	0.0028	0.031
GO:0045893	P	positive regulation of transcription, DNA-templated	10	347	0.0029	0.033
GO:1903508	P	positive regulation of nucleic acid-templated transcription	10	348	0.003	0.033
GO:1902680	P	positive regulation of RNA biosynthetic process	10	348	0.003	0.033
GO:0051254	P	positive regulation of RNA metabolic process	10	356	0.0035	0.038
GO:0051704	P	multi-organism process	28	1631	0.0038	0.041
GO:0065009	P	regulation of molecular function	8	249	0.004	0.043
GO:0009636	P	response to toxic substance	5	102	0.0041	0.044
GO:0009408	P	response to heat	7	199	0.0044	0.046
GO:0002376	P	immune system process	10	369	0.0045	0.047
GO:0050793	P	regulation of developmental process	14	627	0.0047	0.049
GO:0009605	P	response to external stimulus	27	1582	0.0048	0.05
GO:0003700	F	transcription factor activity, sequence-specific DNA binding	53	1729	3.7e-13	6.4e-11
GO:0001071	F	nucleic acid binding transcription factor activity	53	1730	3.8e-13	6.4e-11
GO:0003677	F	DNA binding	53	2417	4.7e-08	5.3e-06
GO:0043565	F	sequence-specific DNA binding	27	825	1e-07	8.8e-06
GO:0008270	F	zinc ion binding	30	1297	2e-05	0.0014
GO:0046914	F	transition metal ion binding	38	1912	4.2e-05	0.0024
GO:0005488	F	binding	152	12081	7.5e-05	0.0036
GO:0061630	F	ubiquitin protein ligase activity	8	140	0.00011	0.0041
GO:0046872	F	metal ion binding	59	3673	0.00013	0.0041
GO:0061659	F	ubiquitin-like protein ligase activity	8	140	0.00011	0.0041
GO:0043169	F	cation binding	59	3678	0.00013	0.0041
GO:0004842	F	ubiquitin-protein transferase activity	13	387	0.00018	0.0051
GO:0019787	F	ubiquitin-like protein transferase activity	13	393	0.00021	0.0054
GO:0043167	F	ion binding	59	3821	0.00036	0.0087
GO:0005515	F	protein binding	57	3669	0.0004	0.009
GO:0001067	F	regulatory region nucleic acid binding	13	455	0.00079	0.015
GO:0044212	F	transcription regulatory region DNA binding	13	452	0.00075	0.015
GO:0000975	F	regulatory region DNA binding	13	455	0.00079	0.015
GO:0080043	F	quercetin 3-O-glucosyltransferase activity	5	71	0.00092	0.016
GO:0080044	F	quercetin 7-O-glucosyltransferase activity	5	71	0.00092	0.016
GO:0003676	F	nucleic acid binding	64	4558	0.0022	0.036
GO:0044464	C	cell part	254	22662	1.7e-06	0.00029
GO:0005623	C	cell	254	22664	1.7e-06	0.00029
GO:0005634	C	nucleus	135	9924	5.2e-06	0.00058
GO:0005886	C	plasma membrane	59	3735	0.0002	0.017

## Sheet: TableS6-2
Supplementary Table S6-2. Gene ontology (GO) enrichment analysis for cluster 2 of DEGs of Brachypodium distachyon during PTI (0, 0.5, 1, 3, 6, and 12 h) in response to flg22
GO term	Ontology	Description	Number in input list	Number in BG/Ref	p-value	FDR
GO:0015979	P	photosynthesis	56	253	2.3e-35	7.4e-32
GO:0044710	P	single-organism metabolic process	181	3970	1.5e-22	2.4e-19
GO:0019684	P	photosynthesis, light reaction	29	134	1.3e-18	1.3e-15
GO:0008152	P	metabolic process	364	12035	1.1e-16	7.6e-14
GO:0009657	P	plastid organization	32	207	1.2e-16	7.6e-14
GO:0006091	P	generation of precursor metabolites and energy	38	364	1.9e-14	9.9e-12
GO:0009658	P	chloroplast organization	25	150	5.9e-14	2.7e-11
GO:0055114	P	oxidation-reduction process	84	1566	9.1e-14	3.6e-11
GO:0044237	P	cellular metabolic process	304	9879	1.4e-13	5.1e-11
GO:0009987	P	cellular process	366	12771	7.1e-13	2.3e-10
GO:0009767	P	photosynthetic electron transport chain	14	56	2.1e-10	5.6e-08
GO:0044711	P	single-organism biosynthetic process	81	1735	2e-10	5.6e-08
GO:0044699	P	single-organism process	280	9448	3.5e-10	8.5e-08
GO:0009642	P	response to light intensity	18	144	1.2e-08	2.6e-06
GO:0005982	P	starch metabolic process	13	66	1.1e-08	2.6e-06
GO:0009735	P	response to cytokinin	23	244	1.7e-08	3.3e-06
GO:0015994	P	chlorophyll metabolic process	14	85	2.4e-08	4.4e-06
GO:0016051	P	carbohydrate biosynthetic process	27	342	3.1e-08	5.4e-06
GO:0044085	P	cellular component biogenesis	54	1095	5e-08	8.4e-06
GO:0010027	P	thylakoid membrane organization	10	38	5.5e-08	8.7e-06
GO:0009668	P	plastid membrane organization	10	39	6.7e-08	1e-05
GO:0022900	P	electron transport chain	15	112	8.8e-08	1.3e-05
GO:0044281	P	small molecule metabolic process	69	1597	9.2e-08	1.3e-05
GO:0006778	P	porphyrin-containing compound metabolic process	14	97	1e-07	1.4e-05
GO:0033013	P	tetrapyrrole metabolic process	14	98	1.2e-07	1.5e-05
GO:0044763	P	single-organism cellular process	200	6591	1.4e-07	1.6e-05
GO:0009628	P	response to abiotic stimulus	81	2022	1.4e-07	1.6e-05
GO:0009416	P	response to light stimulus	41	744	1.4e-07	1.6e-05
GO:0071840	P	cellular component organization or biogenesis	103	2812	1.6e-07	1.8e-05
GO:0009266	P	response to temperature stimulus	34	559	2.1e-07	2.2e-05
GO:0019252	P	starch biosynthetic process	9	35	3e-07	3.1e-05
GO:0009773	P	photosynthetic electron transport in photosystem I	7	16	3.4e-07	3.3e-05
GO:0051186	P	cofactor metabolic process	27	389	3.5e-07	3.3e-05
GO:0009314	P	response to radiation	41	772	3.6e-07	3.4e-05
GO:0044723	P	single-organism carbohydrate metabolic process	35	613	5.5e-07	5e-05
GO:0005975	P	carbohydrate metabolic process	52	1144	9.6e-07	8.5e-05
GO:0015995	P	chlorophyll biosynthetic process	10	61	2.5e-06	0.00021
GO:0034637	P	cellular carbohydrate biosynthetic process	18	219	3.6e-06	0.0003
GO:0043623	P	cellular protein complex assembly	17	197	3.7e-06	0.0003
GO:0042440	P	pigment metabolic process	16	181	5.3e-06	0.00042
GO:0071704	P	organic substance metabolic process	286	10672	5.4e-06	0.00042
GO:0006779	P	porphyrin-containing compound biosynthetic process	10	68	5.9e-06	0.00045
GO:0051188	P	cofactor biosynthetic process	18	229	6.4e-06	0.00048
GO:0033014	P	tetrapyrrole biosynthetic process	10	71	8.4e-06	0.00061
GO:0044249	P	cellular biosynthetic process	173	5870	8.9e-06	0.00063
GO:0046148	P	pigment biosynthetic process	14	148	1e-05	0.0007
GO:0009765	P	photosynthesis, light harvesting	8	44	1.3e-05	0.00088
GO:0070271	P	protein complex biogenesis	20	294	1.5e-05	0.00095
GO:0019253	P	reductive pentose-phosphate cycle	6	20	1.4e-05	0.00095
GO:0042221	P	response to chemical	96	2853	1.5e-05	0.00095
GO:0019685	P	photosynthesis, dark reaction	6	21	1.8e-05	0.0011
GO:0016043	P	cellular component organization	85	2456	1.9e-05	0.0011
GO:0032544	P	plastid translation	5	12	2.1e-05	0.0013
GO:0042742	P	defense response to bacterium	22	354	2.1e-05	0.0013
GO:0009058	P	biosynthetic process	180	6255	2.2e-05	0.0013
GO:1901576	P	organic substance biosynthetic process	171	5913	3e-05	0.0017
GO:0044283	P	small molecule biosynthetic process	32	653	3.2e-05	0.0018
GO:0015977	P	carbon fixation	6	24	3.4e-05	0.0019
GO:0005976	P	polysaccharide metabolic process	24	432	5e-05	0.0027
GO:1901564	P	organonitrogen compound metabolic process	86	2569	5.3e-05	0.0028
GO:0044262	P	cellular carbohydrate metabolic process	23	407	5.6e-05	0.0029
GO:0006006	P	glucose metabolic process	7	40	5.6e-05	0.0029
GO:0009409	P	response to cold	22	384	6.7e-05	0.0034
GO:0000271	P	polysaccharide biosynthetic process	15	202	6.8e-05	0.0034
GO:0009644	P	response to high light intensity	9	76	8.1e-05	0.004
GO:0050896	P	response to stimulus	176	6250	9.4e-05	0.0046
GO:0006979	P	response to oxidative stress	24	453	0.0001	0.0048
GO:0006461	P	protein complex assembly	18	287	0.0001	0.0049
GO:0005996	P	monosaccharide metabolic process	10	99	0.00011	0.0052
GO:0009250	P	glucan biosynthetic process	11	120	0.00011	0.0052
GO:0019752	P	carboxylic acid metabolic process	37	864	0.00012	0.0053
GO:0005986	P	sucrose biosynthetic process	5	19	0.00013	0.0057
GO:0006073	P	cellular glucan metabolic process	15	218	0.00015	0.0065
GO:0044042	P	glucan metabolic process	15	218	0.00015	0.0065
GO:0033692	P	cellular polysaccharide biosynthetic process	13	171	0.00017	0.007
GO:0044264	P	cellular polysaccharide metabolic process	17	273	0.00017	0.0072
GO:0009617	P	response to bacterium	23	441	0.00017	0.0072
GO:0051179	P	localization	82	2517	0.00019	0.0078
GO:0010035	P	response to inorganic substance	38	926	0.00022	0.0087
GO:0071822	P	protein complex subunit organization	19	338	0.00026	0.01
GO:0043436	P	oxoacid metabolic process	39	973	0.00028	0.011
GO:0042254	P	ribosome biogenesis	19	341	0.00029	0.011
GO:0019318	P	hexose metabolic process	8	72	0.0003	0.011
GO:0022607	P	cellular component assembly	27	586	0.00033	0.012
GO:0030091	P	protein repair	5	24	0.00033	0.012
GO:0061024	P	membrane organization	14	212	0.00037	0.014
GO:0006082	P	organic acid metabolic process	42	1099	0.00043	0.016
GO:0051234	P	establishment of localization	77	2406	0.0005	0.018
GO:0061077	P	chaperone-mediated protein folding	5	28	0.00061	0.022
GO:0009408	P	response to heat	13	199	0.00065	0.023
GO:0044802	P	single-organism membrane organization	11	153	0.00079	0.028
GO:0006810	P	transport	75	2391	0.001	0.035
GO:0006950	P	response to stress	103	3506	0.001	0.035
GO:0055085	P	transmembrane transport	28	667	0.001	0.035
GO:1901700	P	response to oxygen-containing compound	53	1557	0.0011	0.037
GO:0010033	P	response to organic substance	65	2023	0.0013	0.042
GO:0000302	P	response to reactive oxygen species	11	166	0.0015	0.048
GO:0003824	F	catalytic activity	276	9101	4.1e-11	3.5e-08
GO:0016491	F	oxidoreductase activity	70	1547	1.3e-08	5.6e-06
GO:0019843	F	rRNA binding	14	97	1e-07	3e-05
GO:0016651	F	oxidoreductase activity, acting on NAD(P)H	12	127	4.3e-05	0.0093
GO:0008266	F	poly(U) RNA binding	5	19	0.00013	0.022
GO:0048038	F	quinone binding	6	35	0.00021	0.026
GO:0008187	F	poly-pyrimidine tract binding	5	21	0.00019	0.026
GO:0005509	F	calcium ion binding	16	266	0.00038	0.03
GO:0005488	F	binding	305	12081	0.00032	0.03
GO:0035251	F	UDP-glucosyltransferase activity	11	137	0.00033	0.03
GO:0043169	F	cation binding	110	3678	0.00036	0.03
GO:0046872	F	metal ion binding	109	3673	0.00051	0.037
GO:0003735	F	structural constituent of ribosome	20	391	0.00056	0.037
GO:0043167	F	ion binding	112	3821	0.00065	0.04
GO:0016787	F	hydrolase activity	98	3279	0.00082	0.047
GO:0016209	F	antioxidant activity	12	181	0.00091	0.049
GO:0044434	C	chloroplast part	217	1419	1.3e-114	8.4e-112
GO:0044435	C	plastid part	218	1455	1.4e-113	4.4e-111
GO:0009507	C	chloroplast	314	4148	6.5e-97	1.4e-94
GO:0009536	C	plastid	315	4213	5.7e-96	9.2e-94
GO:0009579	C	thylakoid	123	584	5.6e-76	7.1e-74
GO:0009534	C	chloroplast thylakoid	110	508	9.1e-69	9.7e-67
GO:0031976	C	plastid thylakoid	110	509	1.1e-68	9.9e-67
GO:0044436	C	thylakoid part	101	463	2.9e-63	2.3e-61
GO:0042651	C	thylakoid membrane	95	421	1.4e-60	1e-58
GO:0034357	C	photosynthetic membrane	95	422	1.7e-60	1.1e-58
GO:0009570	C	chloroplast stroma	115	740	2.1e-58	1.2e-56
GO:0009532	C	plastid stroma	116	774	1.9e-57	1e-55
GO:0009535	C	chloroplast thylakoid membrane	89	400	3e-56	1.5e-54
GO:0055035	C	plastid thylakoid membrane	89	401	3.6e-56	1.7e-54
GO:0031984	C	organelle subcompartment	115	817	2.2e-54	9.2e-53
GO:0044446	C	intracellular organelle part	265	4882	2.2e-49	8.8e-48
GO:0044422	C	organelle part	265	4894	3.5e-49	1.3e-47
GO:0009526	C	plastid envelope	102	707	6.1e-49	2.1e-47
GO:0044444	C	cytoplasmic part	417	10923	8.3e-48	2.8e-46
GO:0009941	C	chloroplast envelope	99	688	2.2e-47	7.1e-46
GO:0005737	C	cytoplasm	445	13406	7.1e-36	2.2e-34
GO:0031975	C	envelope	107	1170	9.4e-35	2.6e-33
GO:0031967	C	organelle envelope	107	1170	9.4e-35	2.6e-33
GO:0031977	C	thylakoid lumen	24	96	7.3e-17	1.9e-15
GO:0043227	C	membrane-bounded organelle	487	18217	9.5e-16	2.4e-14
GO:0043231	C	intracellular membrane-bounded organelle	486	18205	1.7e-15	4.1e-14
GO:0031969	C	chloroplast membrane	33	259	6.2e-15	1.5e-13
GO:0043229	C	intracellular organelle	490	18517	6.6e-15	1.5e-13
GO:0043226	C	organelle	490	18527	7.6e-15	1.7e-13
GO:0042170	C	plastid membrane	33	265	1.1e-14	2.4e-13
GO:0031978	C	plastid thylakoid lumen	20	81	3.4e-14	6.8e-13
GO:0009543	C	chloroplast thylakoid lumen	20	81	3.4e-14	6.8e-13
GO:0016020	C	membrane	272	8532	1.8e-13	3.5e-12
GO:0044464	C	cell part	554	22662	1e-11	2e-10
GO:0005623	C	cell	554	22664	1.1e-11	2e-10
GO:0005622	C	intracellular	518	20721	4.8e-11	8.5e-10
GO:0044424	C	intracellular part	517	20693	6.7e-11	1.1e-09
GO:0009521	C	photosystem	17	96	2.8e-10	4.6e-09
GO:0048046	C	apoplast	36	486	7.7e-10	1.3e-08
GO:0010598	C	NAD(P)H dehydrogenase complex (plastoquinone)	8	13	6.3e-09	1e-07
GO:0009523	C	photosystem II	13	71	2.5e-08	3.8e-07
GO:0010319	C	stromule	10	37	4.4e-08	6.7e-07
GO:0009654	C	photosystem II oxygen evolving complex	7	24	3.2e-06	4.7e-05
GO:0005840	C	ribosome	29	499	3.8e-06	5.4e-05
GO:0009706	C	chloroplast inner membrane	10	79	1.9e-05	0.00028
GO:0044425	C	membrane part	173	5962	2.2e-05	0.0003
GO:0010287	C	plastoglobule	10	80	2.1e-05	0.0003
GO:0009295	C	nucleoid	8	48	2.3e-05	0.0003
GO:0009528	C	plastid inner membrane	10	82	2.6e-05	0.00034
GO:0098796	C	membrane protein complex	29	597	8.5e-05	0.0011
GO:0032991	C	macromolecular complex	86	2658	0.00016	0.002
GO:0031090	C	organelle membrane	61	1760	0.0003	0.0036
GO:0016021	C	integral component of membrane	149	5324	0.00053	0.0064
GO:0031224	C	intrinsic component of membrane	153	5540	0.00078	0.0092
GO:1990904	C	ribonucleoprotein complex	33	852	0.0014	0.016
GO:0030529	C	intracellular ribonucleoprotein complex	33	852	0.0014	0.016
GO:0043232	C	intracellular non-membrane-bounded organelle	51	1543	0.0024	0.027
GO:0043228	C	non-membrane-bounded organelle	51	1543	0.0024	0.027

## Sheet: TableS6-3
Supplementary Table S6-3. Gene ontology (GO) enrichment analysis for cluster 3 of DEGs of Brachypodium distachyon during PTI (0, 0.5, 1, 3, 6, and 12 h) in response to flg22
GO term	Ontology	Description	Number in input list	Number in BG/Ref	p-value	FDR
GO:0050896	P	response to stimulus	258	6250	3.9e-10	1e-06
GO:0015979	P	photosynthesis	30	253	5.3e-10	1e-06
GO:0009628	P	response to abiotic stimulus	107	2022	2.7e-09	3.5e-06
GO:0044710	P	single-organism metabolic process	173	3970	2.9e-08	2.8e-05
GO:0006950	P	response to stress	156	3506	4.7e-08	3.6e-05
GO:0019684	P	photosynthesis, light reaction	19	134	6.4e-08	4.1e-05
GO:0044699	P	single-organism process	341	9448	5.1e-07	0.00028
GO:0009416	P	response to light stimulus	48	744	5.9e-07	0.00029
GO:0042221	P	response to chemical	127	2853	1.1e-06	0.00046
GO:0009314	P	response to radiation	48	772	1.6e-06	0.00061
GO:0006091	P	generation of precursor metabolites and energy	29	364	2.6e-06	0.00091
GO:0044042	P	glucan metabolic process	21	218	4.4e-06	0.0012
GO:0006073	P	cellular glucan metabolic process	21	218	4.4e-06	0.0012
GO:0071554	P	cell wall organization or biogenesis	44	704	3.8e-06	0.0012
GO:1901700	P	response to oxygen-containing compound	77	1557	6.1e-06	0.0016
GO:0009409	P	response to cold	29	384	6.8e-06	0.0016
GO:0044264	P	cellular polysaccharide metabolic process	23	273	1.2e-05	0.0027
GO:0001101	P	response to acid chemical	61	1181	1.8e-05	0.0038
GO:0008152	P	metabolic process	406	12035	2.6e-05	0.0052
GO:0044262	P	cellular carbohydrate metabolic process	28	407	4.7e-05	0.009
GO:0045229	P	external encapsulating structure organization	34	551	5.9e-05	0.011
GO:0055114	P	oxidation-reduction process	73	1566	6.7e-05	0.012
GO:0009266	P	response to temperature stimulus	34	559	7.7e-05	0.013
GO:0009832	P	plant-type cell wall biogenesis	15	160	0.00013	0.021
GO:0009987	P	cellular process	421	12771	0.00016	0.024
GO:0009719	P	response to endogenous stimulus	77	1732	0.00018	0.026
GO:0010035	P	response to inorganic substance	47	926	0.00024	0.033
GO:0042546	P	cell wall biogenesis	18	230	0.00024	0.033
GO:0005976	P	polysaccharide metabolic process	27	432	0.00027	0.036
GO:0007568	P	aging	15	174	0.0003	0.038
GO:0071669	P	plant-type cell wall organization or biogenesis	19	256	0.00031	0.038
GO:0043623	P	cellular protein complex assembly	16	197	0.00036	0.043
GO:0016311	P	dephosphorylation	14	158	0.00037	0.043
GO:0071555	P	cell wall organization	30	518	0.00043	0.049
GO:0003824	F	catalytic activity	345	9101	1.6e-09	1.8e-06
GO:0005515	F	protein binding	153	3669	2.8e-06	0.0015
GO:0016168	F	chlorophyll binding	9	40	7.7e-06	0.0029
GO:0043167	F	ion binding	155	3821	1e-05	0.0029
GO:0016757	F	transferase activity, transferring glycosyl groups	40	654	1.7e-05	0.0031
GO:0016758	F	transferase activity, transferring hexosyl groups	28	382	1.6e-05	0.0031
GO:0005215	F	transporter activity	68	1406	4.2e-05	0.0067
GO:0005488	F	binding	404	12081	6.7e-05	0.0083
GO:0016791	F	phosphatase activity	24	327	6.3e-05	0.0083
GO:0008092	F	cytoskeletal protein binding	21	270	8.3e-05	0.0093
GO:0042578	F	phosphoric ester hydrolase activity	26	391	0.00014	0.014
GO:0043169	F	cation binding	142	3678	0.00024	0.022
GO:0022857	F	transmembrane transporter activity	55	1146	0.00027	0.023
GO:0003779	F	actin binding	12	120	0.00035	0.028
GO:0005509	F	calcium ion binding	19	266	0.00048	0.033
GO:0046872	F	metal ion binding	140	3673	0.00046	0.033
GO:0030170	F	pyridoxal phosphate binding	10	92	0.00059	0.039
GO:0022892	F	substrate-specific transporter activity	49	1045	0.00094	0.05
GO:0016491	F	oxidoreductase activity	67	1547	0.00091	0.05
GO:0031409	F	pigment binding	5	22	0.00083	0.05
GO:0016830	F	carbon-carbon lyase activity	11	115	0.00086	0.05
GO:0044434	C	chloroplast part	131	1419	3.6e-30	2.6e-27
GO:0044435	C	plastid part	132	1455	1e-29	3.7e-27
GO:0009507	C	chloroplast	237	4148	4.1e-25	1e-22
GO:0009536	C	plastid	237	4213	3.2e-24	5.9e-22
GO:0009579	C	thylakoid	68	584	1.1e-20	1.7e-18
GO:0031976	C	plastid thylakoid	62	509	8.2e-20	8.7e-18
GO:0009534	C	chloroplast thylakoid	62	508	7.5e-20	8.7e-18
GO:0044436	C	thylakoid part	57	463	1.7e-18	1.3e-16
GO:0055035	C	plastid thylakoid membrane	53	401	1.8e-18	1.3e-16
GO:0009535	C	chloroplast thylakoid membrane	53	400	1.6e-18	1.3e-16
GO:0009570	C	chloroplast stroma	73	740	2.1e-18	1.4e-16
GO:0044422	C	organelle part	244	4894	2.6e-18	1.6e-16
GO:0044446	C	intracellular organelle part	243	4882	3.9e-18	2.2e-16
GO:0009532	C	plastid stroma	74	774	5.8e-18	3.1e-16
GO:0042651	C	thylakoid membrane	53	421	1.2e-17	5.9e-16
GO:0034357	C	photosynthetic membrane	53	422	1.3e-17	6e-16
GO:0031984	C	organelle subcompartment	74	817	8.6e-17	3.8e-15
GO:0016020	C	membrane	354	8532	2.9e-15	1.2e-13
GO:0005737	C	cytoplasm	495	13406	4.6e-14	1.8e-12
GO:0044464	C	cell part	730	22662	1.1e-12	4e-11
GO:0005623	C	cell	730	22664	1.1e-12	4e-11
GO:0010287	C	plastoglobule	20	80	4.6e-12	1.6e-10
GO:0044444	C	cytoplasmic part	412	10923	8.1e-12	2.6e-10
GO:0009526	C	plastid envelope	57	707	2.6e-11	8e-10
GO:0009941	C	chloroplast envelope	55	688	7.9e-11	2.3e-09
GO:0009521	C	photosystem	20	96	8e-11	2.3e-09
GO:0071944	C	cell periphery	192	4309	6.6e-10	1.8e-08
GO:0044425	C	membrane part	245	5962	2.1e-09	5.7e-08
GO:0031975	C	envelope	73	1170	2.4e-09	6e-08
GO:0031967	C	organelle envelope	73	1170	2.4e-09	6e-08
GO:0005886	C	plasma membrane	166	3735	1.7e-08	4e-07
GO:0031224	C	intrinsic component of membrane	224	5540	5.6e-08	1.3e-06
GO:0009523	C	photosystem II	14	71	1e-07	2.2e-06
GO:0009522	C	photosystem I	10	44	2.2e-06	4.8e-05
GO:0016021	C	integral component of membrane	208	5324	2.3e-06	4.9e-05
GO:0044424	C	intracellular part	654	20693	2.9e-06	6e-05
GO:0005622	C	intracellular	654	20721	3.9e-06	7.7e-05
GO:0042170	C	plastid membrane	23	265	7.7e-06	0.00015
GO:0031226	C	intrinsic component of plasma membrane	24	292	1.2e-05	0.00022
GO:0031090	C	organelle membrane	83	1760	1.4e-05	0.00026
GO:0031969	C	chloroplast membrane	22	259	1.7e-05	0.0003
GO:0048046	C	apoplast	32	486	3.1e-05	0.00054
GO:0046658	C	anchored component of plasma membrane	13	109	4e-05	0.00068
GO:0044459	C	plasma membrane part	29	428	4.4e-05	0.00075
GO:0005794	C	Golgi apparatus	58	1182	0.00011	0.0018
GO:0012505	C	endomembrane system	92	2143	0.00014	0.0022
GO:0043229	C	intracellular organelle	583	18517	0.00019	0.003
GO:0043226	C	organelle	583	18527	0.0002	0.0031
GO:0031977	C	thylakoid lumen	11	96	0.00021	0.0032
GO:0005856	C	cytoskeleton	25	380	0.00022	0.0033
GO:0031978	C	plastid thylakoid lumen	10	81	0.00024	0.0034
GO:0009543	C	chloroplast thylakoid lumen	10	81	0.00024	0.0034
GO:0043231	C	intracellular membrane-bounded organelle	572	18205	0.00036	0.0051
GO:0043227	C	membrane-bounded organelle	572	18217	0.0004	0.0054
GO:0098807	C	chloroplast thylakoid membrane protein complex	6	34	0.00081	0.011
GO:0009705	C	plant-type vacuole membrane	10	106	0.0016	0.021
GO:0098796	C	membrane protein complex	31	597	0.0019	0.024
GO:0031225	C	anchored component of membrane	18	280	0.002	0.026
GO:0000325	C	plant-type vacuole	12	152	0.0024	0.03
GO:0098588	C	bounding membrane of organelle	53	1213	0.0026	0.031
GO:0098805	C	whole membrane	42	925	0.0036	0.044
GO:0046872	F	metal ion binding	146	3673	0.00043	0.021
GO:0004553	F	hydrolase activity, hydrolyzing O-glycosyl compounds	26	405	0.00048	0.021
GO:0016829	F	lyase activity	26	406	0.00049	0.021
GO:0005507	F	copper ion binding	18	238	0.00061	0.023
GO:0015020	F	glucuronosyltransferase activity	5	21	0.00085	0.032
GO:0015293	F	symporter activity	14	171	0.0012	0.043
GO:0042578	F	phosphoric ester hydrolase activity	24	391	0.0014	0.048
GO:0044434	C	chloroplast part	148	1419	2.2e-37	1.6e-34
GO:0044435	C	plastid part	149	1455	8e-37	3e-34
GO:0009507	C	chloroplast	261	4148	5.3e-31	1.3e-28
GO:0009536	C	plastid	261	4213	5.6e-30	1.1e-27
GO:0009579	C	thylakoid	79	584	2.3e-26	3.5e-24
GO:0031976	C	plastid thylakoid	73	509	8.6e-26	9.3e-24
GO:0009534	C	chloroplast thylakoid	73	508	7.7e-26	9.3e-24
GO:0031984	C	organelle subcompartment	91	817	9.8e-25	9.2e-23
GO:0044436	C	thylakoid part	68	463	1.3e-24	1.1e-22
GO:0009535	C	chloroplast thylakoid membrane	63	400	2.7e-24	2e-22
GO:0055035	C	plastid thylakoid membrane	63	401	3e-24	2e-22
GO:0042651	C	thylakoid membrane	64	421	6.2e-24	3.9e-22
GO:0034357	C	photosynthetic membrane	64	422	7e-24	4e-22
GO:0009570	C	chloroplast stroma	84	740	2.3e-23	1.2e-21
GO:0009532	C	plastid stroma	85	774	8.9e-23	4.5e-21
GO:0044422	C	organelle part	261	4894	1e-20	4.8e-19
GO:0044446	C	intracellular organelle part	260	4882	1.5e-20	6.7e-19
GO:0016020	C	membrane	388	8532	2.4e-20	9.9e-19
GO:0010287	C	plastoglobule	28	80	5.2e-19	2.1e-17
GO:0005737	C	cytoplasm	533	13406	3.8e-18	1.4e-16
GO:0009526	C	plastid envelope	72	707	8.6e-18	3.1e-16
GO:0009941	C	chloroplast envelope	68	688	2.9e-16	1e-14
GO:0009521	C	photosystem	26	96	1.7e-15	5.5e-14
GO:0044444	C	cytoplasmic part	446	10923	1.9e-15	5.9e-14
GO:0044425	C	membrane part	274	5962	1.3e-13	3.9e-12
GO:0031975	C	envelope	86	1170	2.8e-13	8e-12
GO:0031967	C	organelle envelope	86	1170	2.8e-13	8e-12
GO:0031224	C	intrinsic component of membrane	256	5540	7.5e-13	2e-11
GO:0044464	C	cell part	760	22662	9.6e-12	2.5e-10
GO:0005623	C	cell	760	22664	9.9e-12	2.5e-10
GO:0071944	C	cell periphery	207	4309	1.1e-11	2.7e-10
GO:0009522	C	photosystem I	16	44	1.2e-11	2.8e-10
GO:0016021	C	integral component of membrane	238	5324	1.8e-10	4.1e-09
GO:0005886	C	plasma membrane	180	3735	3.1e-10	6.9e-09
GO:0009523	C	photosystem II	16	71	4.4e-09	9.5e-08
GO:0005794	C	Golgi apparatus	71	1182	1e-07	2.2e-06
GO:0031090	C	organelle membrane	94	1760	1.6e-07	3.2e-06
GO:0031226	C	intrinsic component of plasma membrane	26	292	3e-06	5.9e-05
GO:0044424	C	intracellular part	683	20693	4e-06	7.8e-05
GO:0005622	C	intracellular	683	20721	5.4e-06	0.0001
GO:0042170	C	plastid membrane	24	265	5.4e-06	0.0001
GO:0031969	C	chloroplast membrane	23	259	1.1e-05	0.0002
GO:0098588	C	bounding membrane of organelle	65	1213	1.3e-05	0.00023
GO:0048046	C	apoplast	34	486	1.4e-05	0.00024
GO:0044459	C	plasma membrane part	31	428	1.8e-05	0.00029
GO:0012505	C	endomembrane system	99	2143	2.9e-05	0.00048
GO:0098796	C	membrane protein complex	38	597	3.1e-05	0.00051
GO:0005856	C	cytoskeleton	28	380	3.3e-05	0.00052
GO:0046658	C	anchored component of plasma membrane	13	109	6.3e-05	0.00097
GO:0009538	C	photosystem I reaction center	5	11	7.2e-05	0.0011
GO:0098807	C	chloroplast thylakoid membrane protein complex	7	34	0.00017	0.0025
GO:0031225	C	anchored component of membrane	21	280	0.00025	0.0036
GO:0044430	C	cytoskeletal part	22	302	0.00026	0.0037
GO:0031977	C	thylakoid lumen	11	96	0.00031	0.0043
GO:0031978	C	plastid thylakoid lumen	10	81	0.00034	0.0045
GO:0009543	C	chloroplast thylakoid lumen	10	81	0.00034	0.0045
GO:0098805	C	whole membrane	48	925	0.00035	0.0046
GO:0015630	C	microtubule cytoskeleton	19	252	0.00045	0.0058
GO:0044431	C	Golgi apparatus part	33	567	0.00047	0.006
GO:0043229	C	intracellular organelle	606	18517	0.0005	0.0063
GO:0043226	C	organelle	606	18527	0.00054	0.0066
GO:0005774	C	vacuolar membrane	39	720	0.00057	0.0069
GO:0044437	C	vacuolar part	39	725	0.00065	0.0077
GO:0099512	C	supramolecular fiber	16	209	0.0011	0.012
GO:0099513	C	polymeric cytoskeletal fiber	16	209	0.0011	0.012
GO:0043231	C	intracellular membrane-bounded organelle	594	18205	0.001	0.012
GO:0043227	C	membrane-bounded organelle	594	18217	0.0011	0.013
GO:0005874	C	microtubule	15	193	0.0013	0.014
GO:0030076	C	light-harvesting complex	5	25	0.0017	0.018
GO:0000139	C	Golgi membrane	23	374	0.0017	0.018
GO:0005773	C	vacuole	61	1359	0.002	0.021
GO:0009705	C	plant-type vacuole membrane	10	106	0.0022	0.023
GO:0000325	C	plant-type vacuole	12	152	0.0034	0.035
GO:0030981	C	cortical microtubule cytoskeleton	5	31	0.0038	0.039
GO:0030312	C	external encapsulating structure	35	706	0.0042	0.042
GO:0005618	C	cell wall	35	706	0.0042	0.042
GO:0030863	C	cortical cytoskeleton	5	33	0.0048	0.047

## Sheet: TableS6-4
Supplementary Table S6-4. Gene ontology (GO) enrichment analysis for cluster 4 of DEGs of Brachypodium distachyon during PTI (0, 0.5, 1, 3, 6, and 12 h) in response to flg22
GO term	Ontology	Description	Number in input list	Number in BG/Ref	p-value	FDR
GO:0050896	P	response to stimulus	128	6250	4e-10	8.6e-07
GO:0044699	P	single-organism process	169	9448	3.7e-09	4e-06
GO:0009628	P	response to abiotic stimulus	57	2022	5.8e-09	4.2e-06
GO:0006950	P	response to stress	81	3506	1.7e-08	9.2e-06
GO:0019684	P	photosynthesis, light reaction	13	134	3.2e-08	1.4e-05
GO:0007264	P	small GTPase mediated signal transduction	11	116	4.5e-07	0.00016
GO:0015979	P	photosynthesis	15	253	1.1e-06	0.00035
GO:0009765	P	photosynthesis, light harvesting	7	44	2.7e-06	0.00066
GO:0044763	P	single-organism cellular process	119	6591	2.7e-06	0.00066
GO:0018298	P	protein-chromophore linkage	7	46	3.5e-06	0.00075
GO:0006091	P	generation of precursor metabolites and energy	17	364	4.9e-06	0.00096
GO:0042221	P	response to chemical	62	2853	8.4e-06	0.0015
GO:0044710	P	single-organism metabolic process	79	3970	9.5e-06	0.0016
GO:0010243	P	response to organonitrogen compound	11	166	1.2e-05	0.0017
GO:0010200	P	response to chitin	10	134	1.1e-05	0.0017
GO:0042742	P	defense response to bacterium	16	354	1.4e-05	0.0018
GO:0009617	P	response to bacterium	18	441	1.5e-05	0.0019
GO:0009768	P	photosynthesis, light harvesting in photosystem I	5	23	2e-05	0.0024
GO:0009987	P	cellular process	195	12771	2.7e-05	0.0031
GO:0009266	P	response to temperature stimulus	20	559	3.1e-05	0.0034
GO:0008152	P	metabolic process	185	12035	4e-05	0.0041
GO:0006810	P	transport	52	2391	4.9e-05	0.0049
GO:0051716	P	cellular response to stimulus	59	2856	6e-05	0.0052
GO:0051234	P	establishment of localization	52	2406	5.8e-05	0.0052
GO:1901700	P	response to oxygen-containing compound	38	1557	5.9e-05	0.0052
GO:0051179	P	localization	53	2517	9.4e-05	0.0078
GO:0035556	P	intracellular signal transduction	21	660	0.0001	0.0081
GO:0050789	P	regulation of biological process	94	5306	0.0001	0.0081
GO:0022900	P	electron transport chain	8	112	0.00011	0.0083
GO:0051707	P	response to other organism	31	1210	0.00013	0.009
GO:0098542	P	defense response to other organism	26	936	0.00013	0.009
GO:0043207	P	response to external biotic stimulus	31	1212	0.00013	0.009
GO:0009414	P	response to water deprivation	14	347	0.00015	0.0097
GO:1901698	P	response to nitrogen compound	12	264	0.00015	0.0098
GO:0009415	P	response to water	14	355	0.00019	0.011
GO:0007165	P	signal transduction	43	1965	0.00021	0.012
GO:0007154	P	cell communication	47	2223	0.00022	0.013
GO:0009834	P	plant-type secondary cell wall biogenesis	6	65	0.00022	0.013
GO:0009607	P	response to biotic stimulus	31	1253	0.00023	0.013
GO:0023052	P	signaling	43	1997	0.00029	0.015
GO:0044700	P	single organism signaling	43	1995	0.00028	0.015
GO:0006952	P	defense response	36	1566	0.00029	0.015
GO:0009605	P	response to external stimulus	36	1582	0.00035	0.017
GO:0050794	P	regulation of cellular process	85	4857	0.00038	0.019
GO:0071702	P	organic substance transport	30	1234	0.00039	0.019
GO:0001101	P	response to acid chemical	29	1181	0.00041	0.019
GO:0006970	P	response to osmotic stress	19	636	0.00046	0.021
GO:0016192	P	vesicle-mediated transport	14	397	0.00055	0.025
GO:0030244	P	cellulose biosynthetic process	5	51	0.00059	0.026
GO:0010035	P	response to inorganic substance	24	926	0.00063	0.027
GO:0015031	P	protein transport	19	653	0.00062	0.027
GO:0008104	P	protein localization	20	715	0.00072	0.029
GO:0045184	P	establishment of protein localization	19	661	0.00071	0.029
GO:0010033	P	response to organic substance	42	2023	0.00071	0.029
GO:0033036	P	macromolecule localization	25	996	0.00076	0.03
GO:0065007	P	biological regulation	100	6062	0.00079	0.031
GO:0009767	P	photosynthetic electron transport chain	5	56	0.00087	0.033
GO:0009719	P	response to endogenous stimulus	37	1732	0.0009	0.034
GO:0009651	P	response to salt stress	17	574	0.00098	0.036
GO:0051704	P	multi-organism process	35	1631	0.0012	0.041
GO:0009416	P	response to light stimulus	20	744	0.0012	0.041
GO:0044237	P	cellular metabolic process	149	9879	0.0013	0.046
GO:0005515	F	protein binding	75	3669	6.8e-06	0.0035
GO:0016168	F	chlorophyll binding	6	40	1.9e-05	0.0048
GO:0005488	F	binding	185	12081	5.2e-05	0.0057
GO:0032553	F	ribonucleotide binding	56	2664	6.1e-05	0.0057
GO:0005525	F	GTP binding	13	282	7.2e-05	0.0057
GO:0003824	F	catalytic activity	146	9101	7.8e-05	0.0057
GO:0097367	F	carbohydrate derivative binding	57	2696	4.4e-05	0.0057
GO:0019001	F	guanyl nucleotide binding	13	301	0.00013	0.0076
GO:0032561	F	guanyl ribonucleotide binding	13	301	0.00013	0.0076
GO:0035639	F	purine ribonucleoside triphosphate binding	52	2515	0.00017	0.0088
GO:0032549	F	ribonucleoside binding	52	2617	0.00044	0.014
GO:1901265	F	nucleoside phosphate binding	63	3370	0.00051	0.014
GO:0017076	F	purine nucleotide binding	52	2633	0.0005	0.014
GO:0032555	F	purine ribonucleotide binding	52	2631	0.00049	0.014
GO:0000166	F	nucleotide binding	63	3370	0.00051	0.014
GO:0001882	F	nucleoside binding	52	2618	0.00044	0.014
GO:0001883	F	purine nucleoside binding	52	2612	0.00042	0.014
GO:0032550	F	purine ribonucleoside binding	52	2612	0.00042	0.014
GO:0036094	F	small molecule binding	63	3434	0.00082	0.022
GO:0009055	F	electron carrier activity	9	196	0.00094	0.024
GO:0048037	F	cofactor binding	14	451	0.0018	0.043
GO:0035251	F	UDP-glucosyltransferase activity	7	137	0.0019	0.045
GO:0031984	C	organelle subcompartment	40	817	3.7e-13	2e-10
GO:0016020	C	membrane	163	8532	5.1e-11	1.4e-08
GO:0071944	C	cell periphery	98	4309	6.5e-10	1.2e-07
GO:0005886	C	plasma membrane	88	3735	1.3e-09	1.7e-07
GO:0005794	C	Golgi apparatus	41	1182	4.5e-09	5e-07
GO:0031976	C	plastid thylakoid	24	509	4.6e-08	3.1e-06
GO:0044422	C	organelle part	101	4894	5.2e-08	3.1e-06
GO:0055035	C	plastid thylakoid membrane	21	401	6.1e-08	3.1e-06
GO:0009535	C	chloroplast thylakoid membrane	21	400	5.9e-08	3.1e-06
GO:0009534	C	chloroplast thylakoid	24	508	4.4e-08	3.1e-06
GO:0044446	C	intracellular organelle part	101	4882	4.6e-08	3.1e-06
GO:0034357	C	photosynthetic membrane	21	422	1.4e-07	5.8e-06
GO:0044436	C	thylakoid part	22	463	1.5e-07	5.8e-06
GO:0042651	C	thylakoid membrane	21	421	1.3e-07	5.8e-06
GO:0044464	C	cell part	314	22662	1.7e-07	5.9e-06
GO:0005623	C	cell	314	22664	1.7e-07	5.9e-06
GO:0009579	C	thylakoid	24	584	5e-07	1.5e-05
GO:0005773	C	vacuole	40	1359	4.9e-07	1.5e-05
GO:0009521	C	photosystem	10	96	6.8e-07	2e-05
GO:0005768	C	endosome	19	405	1.3e-06	3.5e-05
GO:0098796	C	membrane protein complex	23	597	2.5e-06	6.5e-05
GO:0012505	C	endomembrane system	52	2143	2.6e-06	6.5e-05
GO:0005774	C	vacuolar membrane	25	720	5.3e-06	0.00013
GO:0044437	C	vacuolar part	25	725	6e-06	0.00013
GO:0044435	C	plastid part	39	1455	6.1e-06	0.00013
GO:0044434	C	chloroplast part	38	1419	8.2e-06	0.00017
GO:0044425	C	membrane part	108	5962	9e-06	0.00018
GO:0098791	C	Golgi subcompartment	15	303	9.1e-06	0.00018
GO:0044431	C	Golgi apparatus part	21	567	1.2e-05	0.00022
GO:0010287	C	plastoglobule	8	80	1.2e-05	0.00022
GO:0098588	C	bounding membrane of organelle	33	1213	2.5e-05	0.00044
GO:0005802	C	trans-Golgi network	13	256	2.8e-05	0.00048
GO:0009522	C	photosystem I	6	44	3.1e-05	0.00051
GO:0031090	C	organelle membrane	42	1760	3.9e-05	0.00063
GO:0009523	C	photosystem II	7	71	4.6e-05	0.00068
GO:0098805	C	whole membrane	27	925	4.4e-05	0.00068
GO:0031224	C	intrinsic component of membrane	99	5540	4.5e-05	0.00068
GO:0010008	C	endosome membrane	10	165	5.9e-05	0.00085
GO:0044444	C	cytoplasmic part	170	10923	6.2e-05	0.00088
GO:0044440	C	endosomal part	10	168	6.8e-05	0.00093
GO:0016021	C	integral component of membrane	94	5324	0.00012	0.0016
GO:0005737	C	cytoplasm	197	13406	0.00032	0.0042
GO:0043234	C	protein complex	39	1834	0.00071	0.0091
GO:0009526	C	plastid envelope	19	707	0.0015	0.019
GO:0009507	C	chloroplast	71	4148	0.0023	0.028
GO:0009941	C	chloroplast envelope	18	688	0.0027	0.032
GO:0030312	C	external encapsulating structure	18	706	0.0035	0.039
GO:0005618	C	cell wall	18	706	0.0035	0.039
GO:0009536	C	plastid	71	4213	0.0034	0.039
GO:0009532	C	plastid stroma	19	774	0.004	0.044
GO:0005622	C	intracellular	276	20721	0.0045	0.048

## Sheet: TableS6-5
Supplementary Table S6-5. Gene ontology (GO) enrichment analysis for cluster 5 of DEGs of Brachypodium distachyon during PTI (0, 0.5, 1, 3, 6, and 12 h) in response to flg22
GO term	Ontology	Description	Number in input list	Number in BG/Ref	p-value	FDR
GO:0006796	P	phosphate-containing compound metabolic process	74	1735	1.3e-14	1.3e-11
GO:0006793	P	phosphorus metabolic process	75	1751	6.7e-15	1.3e-11
GO:0016310	P	phosphorylation	61	1254	1.7e-14	1.3e-11
GO:0006468	P	protein phosphorylation	50	936	1.8e-13	1.1e-10
GO:0044699	P	single-organism process	223	9448	2.4e-13	1.1e-10
GO:0006464	P	cellular protein modification process	78	2126	3.9e-12	1.3e-09
GO:0036211	P	protein modification process	78	2126	3.9e-12	1.3e-09
GO:0044763	P	single-organism cellular process	168	6591	6.1e-12	1.8e-09
GO:0006952	P	defense response	63	1566	1.7e-11	4.6e-09
GO:0050896	P	response to stimulus	160	6250	2e-11	4.8e-09
GO:0010200	P	response to chitin	18	134	2.7e-11	5.8e-09
GO:0010243	P	response to organonitrogen compound	19	166	9.1e-11	1.8e-08
GO:0008219	P	cell death	20	194	1.6e-10	3e-08
GO:0043412	P	macromolecule modification	83	2532	1.8e-10	3e-08
GO:0009987	P	cellular process	266	12771	3e-10	4.8e-08
GO:0008152	P	metabolic process	252	12035	1.2e-09	1.8e-07
GO:1901700	P	response to oxygen-containing compound	58	1557	1.9e-09	2.7e-07
GO:0006950	P	response to stress	100	3506	2.7e-09	3.7e-07
GO:0071704	P	organic substance metabolic process	227	10672	6.7e-09	8.4e-07
GO:0010033	P	response to organic substance	66	2023	2.1e-08	2.6e-06
GO:0012501	P	programmed cell death	15	147	3.6e-08	4.1e-06
GO:0010941	P	regulation of cell death	11	71	5.4e-08	5.9e-06
GO:0002376	P	immune system process	23	369	5.7e-08	5.9e-06
GO:1901698	P	response to nitrogen compound	19	264	1e-07	1e-05
GO:0045087	P	innate immune response	21	323	1.1e-07	1.1e-05
GO:0006955	P	immune response	21	333	1.8e-07	1.7e-05
GO:0044237	P	cellular metabolic process	207	9879	2.5e-07	2.3e-05
GO:0044700	P	single organism signaling	62	1995	3.2e-07	2.6e-05
GO:0009617	P	response to bacterium	24	441	3.1e-07	2.6e-05
GO:0023052	P	signaling	62	1997	3.3e-07	2.6e-05
GO:0009607	P	response to biotic stimulus	45	1253	4e-07	3.1e-05
GO:0007165	P	signal transduction	61	1965	4.1e-07	3.1e-05
GO:0007166	P	cell surface receptor signaling pathway	17	234	4.3e-07	3.1e-05
GO:0042742	P	defense response to bacterium	21	354	4.7e-07	3.3e-05
GO:0007154	P	cell communication	66	2223	6.1e-07	4.2e-05
GO:0051704	P	multi-organism process	53	1631	7e-07	4.6e-05
GO:0044238	P	primary metabolic process	205	9890	7.4e-07	4.8e-05
GO:0051707	P	response to other organism	43	1210	9.5e-07	6e-05
GO:0043207	P	response to external biotic stimulus	43	1212	9.9e-07	6.1e-05
GO:0050789	P	regulation of biological process	125	5306	1e-06	6.1e-05
GO:0050794	P	regulation of cellular process	116	4857	1.5e-06	9e-05
GO:0009626	P	plant-type hypersensitive response	10	84	2e-06	0.00011
GO:0034050	P	host programmed cell death induced by symbiont	10	85	2.2e-06	0.00012
GO:0042221	P	response to chemical	77	2853	2.3e-06	0.00012
GO:0009605	P	response to external stimulus	50	1582	3.2e-06	0.00017
GO:0009719	P	response to endogenous stimulus	53	1732	3.9e-06	0.0002
GO:0001101	P	response to acid chemical	40	1181	7e-06	0.00036
GO:0044710	P	single-organism metabolic process	96	3970	1e-05	0.00051
GO:0051716	P	cellular response to stimulus	74	2856	1.5e-05	0.00072
GO:0065007	P	biological regulation	132	6062	2.6e-05	0.0013
GO:0019538	P	protein metabolic process	100	4289	2.8e-05	0.0013
GO:0043067	P	regulation of programmed cell death	7	54	4.2e-05	0.0019
GO:0098542	P	defense response to other organism	32	936	5e-05	0.0023
GO:0044723	P	single-organism carbohydrate metabolic process	24	613	6.2e-05	0.0028
GO:0046777	P	protein autophosphorylation	10	133	7.9e-05	0.0034
GO:0009816	P	defense response to bacterium, incompatible interaction	6	43	0.0001	0.0044
GO:0014070	P	response to organic cyclic compound	18	405	0.00012	0.0049
GO:0060548	P	negative regulation of cell death	5	29	0.00016	0.0068
GO:0009751	P	response to salicylic acid	12	209	0.00018	0.0073
GO:0080134	P	regulation of response to stress	15	316	0.00022	0.0087
GO:0009611	P	response to wounding	12	217	0.00025	0.0098
GO:0044267	P	cellular protein metabolic process	87	3841	0.00028	0.011
GO:0043170	P	macromolecule metabolic process	161	8111	0.00031	0.012
GO:0048583	P	regulation of response to stimulus	21	565	0.00035	0.013
GO:0009863	P	salicylic acid mediated signaling pathway	6	56	0.00038	0.014
GO:0044711	P	single-organism biosynthetic process	46	1735	0.00044	0.016
GO:1901701	P	cellular response to oxygen-containing compound	22	635	0.00063	0.022
GO:0071446	P	cellular response to salicylic acid stimulus	6	62	0.00063	0.022
GO:0033554	P	cellular response to stress	27	858	0.00067	0.023
GO:0044283	P	small molecule biosynthetic process	22	653	0.00089	0.031
GO:0071229	P	cellular response to acid chemical	18	485	0.00091	0.031
GO:0006904	P	vesicle docking involved in exocytosis	5	44	0.00093	0.031
GO:0044260	P	cellular macromolecule metabolic process	146	7410	0.001	0.033
GO:0071310	P	cellular response to organic substance	30	1023	0.001	0.033
GO:0070887	P	cellular response to chemical stimulus	33	1176	0.0012	0.038
GO:0043648	P	dicarboxylic acid metabolic process	6	71	0.0012	0.038
GO:0007167	P	enzyme linked receptor protein signaling pathway	8	130	0.0014	0.043
GO:0007169	P	transmembrane receptor protein tyrosine kinase signaling pathway	8	130	0.0014	0.043
GO:0019752	P	carboxylic acid metabolic process	26	864	0.0015	0.047
GO:0003824	F	catalytic activity	228	9101	6.7e-17	4.5e-14
GO:0016740	F	transferase activity	125	3791	4.1e-16	1.4e-13
GO:0016773	F	phosphotransferase activity, alcohol group as acceptor	58	1072	1e-15	2.3e-13
GO:0016301	F	kinase activity	67	1436	4.9e-15	8.3e-13
GO:0016772	F	transferase activity, transferring phosphorus-containing groups	70	1657	1.2e-13	1.3e-11
GO:0004672	F	protein kinase activity	50	925	1.2e-13	1.3e-11
GO:0004674	F	protein serine/threonine kinase activity	45	767	1.5e-13	1.5e-11
GO:0005524	F	ATP binding	83	2248	5e-13	4.2e-11
GO:0030554	F	adenyl nucleotide binding	83	2366	6.6e-12	4.4e-10
GO:0032559	F	adenyl ribonucleotide binding	83	2364	6.3e-12	4.4e-10
GO:0097367	F	carbohydrate derivative binding	90	2696	9.4e-12	5.8e-10
GO:0035639	F	purine ribonucleoside triphosphate binding	84	2515	5.4e-11	3e-09
GO:0032553	F	ribonucleotide binding	87	2664	6.9e-11	3.6e-09
GO:0000166	F	nucleotide binding	101	3370	1.6e-10	7.2e-09
GO:1901265	F	nucleoside phosphate binding	101	3370	1.6e-10	7.2e-09
GO:0036094	F	small molecule binding	102	3434	2.1e-10	8.7e-09
GO:0032550	F	purine ribonucleoside binding	84	2612	3.3e-10	1.2e-08
GO:0001883	F	purine nucleoside binding	84	2612	3.3e-10	1.2e-08
GO:0032549	F	ribonucleoside binding	84	2617	3.6e-10	1.2e-08
GO:0001882	F	nucleoside binding	84	2618	3.7e-10	1.2e-08
GO:0017076	F	purine nucleotide binding	84	2633	4.8e-10	1.5e-08
GO:0032555	F	purine ribonucleotide binding	84	2631	4.6e-10	1.5e-08
GO:0005488	F	binding	243	12081	2.2e-07	6.6e-06
GO:0005515	F	protein binding	94	3669	1.2e-06	3.5e-05
GO:0042578	F	phosphoric ester hydrolase activity	21	391	2.1e-06	5.7e-05
GO:0016791	F	phosphatase activity	18	327	8.1e-06	0.00021
GO:0042802	F	identical protein binding	15	236	9.4e-06	0.00024
GO:0099600	F	transmembrane receptor activity	12	156	1.3e-05	0.0003
GO:0019199	F	transmembrane receptor protein kinase activity	10	106	1.3e-05	0.0003
GO:0038023	F	signaling receptor activity	12	165	2.1e-05	0.00048
GO:0004888	F	transmembrane signaling receptor activity	11	140	2.4e-05	0.00052
GO:0004675	F	transmembrane receptor protein serine/threonine kinase activity	9	92	2.7e-05	0.00057
GO:0060089	F	molecular transducer activity	13	209	4.5e-05	0.0009
GO:0004872	F	receptor activity	13	209	4.5e-05	0.0009
GO:1901363	F	heterocyclic compound binding	158	7718	7.8e-05	0.0015
GO:0097159	F	organic cyclic compound binding	158	7737	8.9e-05	0.0017
GO:0005516	F	calmodulin binding	13	252	0.00026	0.0048
GO:0016788	F	hydrolase activity, acting on ester bonds	34	1131	0.00031	0.0055
GO:0004871	F	signal transducer activity	17	406	0.00035	0.006
GO:0030246	F	carbohydrate binding	14	303	0.00045	0.0076
GO:0042803	F	protein homodimerization activity	9	143	0.00061	0.01
GO:0016758	F	transferase activity, transferring hexosyl groups	15	382	0.0014	0.023
GO:0004722	F	protein serine/threonine phosphatase activity	9	164	0.0015	0.024
GO:0004721	F	phosphoprotein phosphatase activity	10	203	0.0018	0.028
GO:0016757	F	transferase activity, transferring glycosyl groups	21	654	0.002	0.031
GO:0005886	C	plasma membrane	129	3735	2.9e-18	1.4e-15
GO:0071944	C	cell periphery	140	4309	9.8e-18	2.5e-15
GO:0016020	C	membrane	213	8532	3.6e-15	6e-13
GO:0044425	C	membrane part	160	5962	4.3e-13	5.3e-11
GO:0031224	C	intrinsic component of membrane	146	5540	3.3e-11	3.3e-09
GO:0016021	C	integral component of membrane	136	5324	1.8e-09	1.5e-07
GO:0044464	C	cell part	395	22662	3e-07	1.9e-05
GO:0005623	C	cell	395	22664	3e-07	1.9e-05
GO:0005794	C	Golgi apparatus	39	1182	1.6e-05	0.0009
GO:0044431	C	Golgi apparatus part	23	567	5.3e-05	0.0027
GO:0005938	C	cell cortex	8	83	8.3e-05	0.0035
GO:0099568	C	cytoplasmic region	8	83	8.3e-05	0.0035
GO:0012505	C	endomembrane system	56	2143	0.00015	0.0053
GO:0098791	C	Golgi subcompartment	15	303	0.00014	0.0053
GO:0044448	C	cell cortex part	7	70	0.00019	0.0062
GO:0005802	C	trans-Golgi network	13	256	0.00031	0.0096
GO:0044459	C	plasma membrane part	17	428	0.00061	0.018
GO:0030054	C	cell junction	27	901	0.0013	0.032
GO:0005911	C	cell-cell junction	27	901	0.0013	0.032
GO:0009506	C	plasmodesma	27	899	0.0013	0.032
GO:0055044	C	symplast	27	899	0.0013	0.032
GO:0016820	F	hydrolase activity, acting on acid anhydrides, catalyzing transmembrane movement of substances	10	205	0.0022	0.028
GO:0016791	F	phosphatase activity	13	327	0.003	0.038
GO:0043167	F	ion binding	82	3821	0.0033	0.041
GO:0000287	F	magnesium ion binding	7	118	0.0036	0.044
GO:0005886	C	plasma membrane	147	3735	9.1e-26	4e-23
GO:0071944	C	cell periphery	157	4309	2.5e-24	5.7e-22
GO:0016020	C	membrane	229	8532	1.1e-19	1.6e-17
GO:0031224	C	intrinsic component of membrane	162	5540	8.3e-16	9.3e-14
GO:0044425	C	membrane part	170	5962	1.1e-15	9.4e-14
GO:0016021	C	integral component of membrane	152	5324	8.2e-14	6.1e-12
GO:0044464	C	cell part	404	22662	5.9e-08	3.4e-06
GO:0005623	C	cell	404	22664	6e-08	3.4e-06
GO:0005794	C	Golgi apparatus	41	1182	4.7e-06	0.00023
GO:0044431	C	Golgi apparatus part	25	567	8.9e-06	0.0004
GO:0012505	C	endomembrane system	58	2143	7.3e-05	0.0029
GO:0098791	C	Golgi subcompartment	15	303	0.00017	0.0063
GO:0005802	C	trans-Golgi network	13	256	0.00036	0.012
GO:0005938	C	cell cortex	7	83	0.00054	0.016
GO:0099568	C	cytoplasmic region	7	83	0.00054	0.016
GO:0044459	C	plasma membrane part	17	428	0.00075	0.021
GO:0044448	C	cell cortex part	6	70	0.0012	0.033

## Sheet: TableS6-6
Supplementary Table S6-6. Gene ontology (GO) enrichment analysis for cluster 6 of DEGs of Brachypodium distachyon during PTI (0, 0.5, 1, 3, 6, and 12 h) in response to flg22
GO term	Ontology	Description	Number in input list	Number in BG/Ref	p-value	FDR
GO:0044710	P	single-organism metabolic process	105	3970	1.1e-12	2.3e-09
GO:0050896	P	response to stimulus	138	6250	4.4e-11	4.5e-08
GO:0044699	P	single-organism process	184	9448	1.3e-10	8.5e-08
GO:0006950	P	response to stress	89	3506	8.7e-10	4.4e-07
GO:0044763	P	single-organism cellular process	137	6591	3.5e-09	1.2e-06
GO:0006793	P	phosphorus metabolic process	55	1751	3.1e-09	1.2e-06
GO:0016310	P	phosphorylation	44	1254	6.5e-09	1.6e-06
GO:0006796	P	phosphate-containing compound metabolic process	54	1735	6.1e-09	1.6e-06
GO:0006468	P	protein phosphorylation	36	936	1.9e-08	4.3e-06
GO:0012501	P	programmed cell death	13	147	1.8e-07	3.7e-05
GO:0009698	P	phenylpropanoid metabolic process	13	164	5.9e-07	0.00011
GO:0009628	P	response to abiotic stimulus	54	2022	7.6e-07	0.00013
GO:0009699	P	phenylpropanoid biosynthetic process	11	121	1.3e-06	0.00019
GO:0044711	P	single-organism biosynthetic process	48	1735	1.3e-06	0.00019
GO:0005975	P	carbohydrate metabolic process	36	1144	2e-06	0.00027
GO:0008219	P	cell death	13	194	3.4e-06	0.00043
GO:0009808	P	lignin metabolic process	9	95	8.6e-06	0.001
GO:0044281	P	small molecule metabolic process	43	1597	9.4e-06	0.0011
GO:0006952	P	defense response	42	1566	1.3e-05	0.0013
GO:0036211	P	protein modification process	52	2126	1.4e-05	0.0013
GO:0019748	P	secondary metabolic process	20	492	1.4e-05	0.0013
GO:0006464	P	cellular protein modification process	52	2126	1.4e-05	0.0013
GO:0051707	P	response to other organism	35	1210	1.6e-05	0.0014
GO:0043207	P	response to external biotic stimulus	35	1212	1.7e-05	0.0014
GO:0008152	P	metabolic process	198	12035	2e-05	0.0017
GO:0009626	P	plant-type hypersensitive response	8	84	2.6e-05	0.0021
GO:0034050	P	host programmed cell death induced by symbiont	8	85	2.9e-05	0.0022
GO:0009607	P	response to biotic stimulus	35	1253	3.3e-05	0.0023
GO:0051704	P	multi-organism process	42	1631	3.3e-05	0.0023
GO:0009605	P	response to external stimulus	41	1582	3.6e-05	0.0024
GO:0055085	P	transmembrane transport	23	667	4e-05	0.0026
GO:0007166	P	cell surface receptor signaling pathway	12	234	9.7e-05	0.0061
GO:0042221	P	response to chemical	61	2853	0.00012	0.0072
GO:0043067	P	regulation of programmed cell death	6	54	0.00013	0.0075
GO:0002376	P	immune system process	15	369	0.00016	0.0096
GO:0009987	P	cellular process	202	12771	0.00023	0.013
GO:0006732	P	coenzyme metabolic process	12	264	0.00028	0.015
GO:0044550	P	secondary metabolite biosynthetic process	13	311	0.00034	0.018
GO:0009617	P	response to bacterium	16	441	0.00035	0.018
GO:0055114	P	oxidation-reduction process	37	1566	0.00051	0.022
GO:0009809	P	lignin biosynthetic process	6	70	0.00046	0.022
GO:1901605	P	alpha-amino acid metabolic process	11	242	0.0005	0.022
GO:0008037	P	cell recognition	5	45	0.00046	0.022
GO:0010941	P	regulation of cell death	6	71	0.00049	0.022
GO:0071704	P	organic substance metabolic process	172	10672	0.00046	0.022
GO:0045087	P	innate immune response	13	323	0.00048	0.022
GO:0001101	P	response to acid chemical	30	1181	0.00057	0.025
GO:0006955	P	immune response	13	333	0.00064	0.027
GO:0044723	P	single-organism carbohydrate metabolic process	19	613	0.00066	0.027
GO:0044237	P	cellular metabolic process	160	9879	0.00071	0.029
GO:0051186	P	cofactor metabolic process	14	389	0.00086	0.034
GO:0043412	P	macromolecule modification	52	2532	0.00097	0.038
GO:0044262	P	cellular carbohydrate metabolic process	14	407	0.0013	0.049
GO:1901607	P	alpha-amino acid biosynthetic process	8	154	0.0013	0.049
GO:0003824	F	catalytic activity	192	9101	8.3e-15	5.7e-12
GO:0005524	F	ATP binding	69	2248	5.6e-11	1.9e-08
GO:0030554	F	adenyl nucleotide binding	69	2366	4.8e-10	6.5e-08
GO:0032559	F	adenyl ribonucleotide binding	69	2364	4.6e-10	6.5e-08
GO:0035639	F	purine ribonucleoside triphosphate binding	72	2515	4e-10	6.5e-08
GO:0032549	F	ribonucleoside binding	72	2617	2.1e-09	1.7e-07
GO:0001883	F	purine nucleoside binding	72	2612	2e-09	1.7e-07
GO:0001882	F	nucleoside binding	72	2618	2.2e-09	1.7e-07
GO:0032550	F	purine ribonucleoside binding	72	2612	2e-09	1.7e-07
GO:0017076	F	purine nucleotide binding	72	2633	2.8e-09	1.7e-07
GO:0032555	F	purine ribonucleotide binding	72	2631	2.7e-09	1.7e-07
GO:0097367	F	carbohydrate derivative binding	73	2696	3.1e-09	1.8e-07
GO:0036094	F	small molecule binding	86	3434	3.5e-09	1.8e-07
GO:0032553	F	ribonucleotide binding	72	2664	4.5e-09	2.2e-07
GO:0000166	F	nucleotide binding	84	3370	6.9e-09	3e-07
GO:1901265	F	nucleoside phosphate binding	84	3370	6.9e-09	3e-07
GO:0016773	F	phosphotransferase activity, alcohol group as acceptor	37	1072	1.7e-07	6.7e-06
GO:0004674	F	protein serine/threonine kinase activity	30	767	2.2e-07	8.3e-06
GO:0016740	F	transferase activity	85	3791	5.5e-07	2e-05
GO:0016301	F	kinase activity	43	1436	6.8e-07	2.3e-05
GO:0004672	F	protein kinase activity	32	925	1.1e-06	3.7e-05
GO:0022804	F	active transmembrane transporter activity	24	595	2.2e-06	6.9e-05
GO:0030246	F	carbohydrate binding	16	303	4.9e-06	0.00014
GO:0022857	F	transmembrane transporter activity	35	1146	5.3e-06	0.00015
GO:0016772	F	transferase activity, transferring phosphorus-containing groups	44	1657	1e-05	0.00028
GO:0008194	F	UDP-glycosyltransferase activity	14	273	2.6e-05	0.00068
GO:0005215	F	transporter activity	38	1406	3e-05	0.00075
GO:0015291	F	secondary active transmembrane transporter activity	15	338	6.5e-05	0.0016
GO:0022891	F	substrate-specific transmembrane transporter activity	27	916	0.00011	0.0027
GO:0016836	F	hydro-lyase activity	7	79	0.00013	0.0029
GO:0015293	F	symporter activity	10	171	0.00013	0.0029
GO:0005488	F	binding	193	12081	0.00021	0.0045
GO:0015926	F	glucosidase activity	7	87	0.00022	0.0046
GO:0016758	F	transferase activity, transferring hexosyl groups	15	382	0.00024	0.0047
GO:0015075	F	ion transmembrane transporter activity	20	629	0.00035	0.0068
GO:0005351	F	sugar:proton symporter activity	7	95	0.00037	0.0068
GO:0005402	F	cation:sugar symporter activity	7	95	0.00037	0.0068
GO:0022892	F	substrate-specific transporter activity	28	1045	0.00039	0.0069
GO:0016491	F	oxidoreductase activity	37	1547	0.00041	0.0069
GO:0015295	F	solute:proton symporter activity	7	97	0.00042	0.0069
GO:0015294	F	solute:cation symporter activity	8	128	0.00041	0.0069
GO:0016829	F	lyase activity	15	406	0.00044	0.0071
GO:1901677	F	phosphate transmembrane transporter activity	5	46	0.00051	0.0081
GO:0016757	F	transferase activity, transferring glycosyl groups	20	654	0.00056	0.0086
GO:0015238	F	drug transmembrane transporter activity	6	73	0.00057	0.0086
GO:0035251	F	UDP-glucosyltransferase activity	8	137	0.00063	0.0093
GO:0090484	F	drug transporter activity	6	77	0.00074	0.011
GO:1901363	F	heterocyclic compound binding	129	7718	0.001	0.014
GO:0097159	F	organic cyclic compound binding	129	7737	0.0011	0.016
GO:0051119	F	sugar transmembrane transporter activity	7	118	0.0012	0.017
GO:0001871	F	pattern binding	5	58	0.0013	0.018
GO:0030247	F	polysaccharide binding	5	58	0.0013	0.018
GO:0046527	F	glucosyltransferase activity	8	158	0.0015	0.019
GO:1901476	F	carbohydrate transporter activity	7	123	0.0016	0.019
GO:0015144	F	carbohydrate transmembrane transporter activity	7	123	0.0016	0.019
GO:0042626	F	ATPase activity, coupled to transmembrane movement of substances	9	202	0.0018	0.022
GO:0008509	F	anion transmembrane transporter activity	8	164	0.0019	0.022
GO:0043492	F	ATPase activity, coupled to movement of substances	9	203	0.0019	0.022
GO:0016820	F	hydrolase activity, acting on acid anhydrides, catalyzing transmembrane movement of substances	9	205	0.002	0.023
GO:0043167	F	ion binding	70	3821	0.0025	0.029
GO:0008422	F	beta-glucosidase activity	5	71	0.0031	0.033
GO:0080043	F	quercetin 3-O-glucosyltransferase activity	5	71	0.0031	0.033
GO:0080044	F	quercetin 7-O-glucosyltransferase activity	5	71	0.0031	0.033
GO:0005509	F	calcium ion binding	10	266	0.0034	0.036
GO:0004553	F	hydrolase activity, hydrolyzing O-glycosyl compounds	13	405	0.0034	0.036
GO:0005506	F	iron ion binding	11	317	0.0039	0.04
GO:0071944	C	cell periphery	132	4309	1e-21	4.5e-19
GO:0005886	C	plasma membrane	119	3735	1.3e-20	2.8e-18
GO:0016020	C	membrane	198	8532	2.5e-20	3.6e-18
GO:0044425	C	membrane part	142	5962	5.3e-14	5.7e-12
GO:0031224	C	intrinsic component of membrane	134	5540	1.4e-13	1.2e-11
GO:0016021	C	integral component of membrane	126	5324	5.4e-12	3.9e-10
GO:0031090	C	organelle membrane	51	1760	1.5e-07	9.3e-06
GO:0044464	C	cell part	334	22662	2.5e-07	1.2e-05
GO:0005623	C	cell	334	22664	2.6e-07	1.2e-05
GO:0005773	C	vacuole	38	1359	1.4e-05	0.00063
GO:0005740	C	mitochondrial envelope	16	376	6e-05	0.0024
GO:0012505	C	endomembrane system	50	2143	6.8e-05	0.0025
GO:0031966	C	mitochondrial membrane	15	362	0.00013	0.0042
GO:0005794	C	Golgi apparatus	32	1182	0.00013	0.0042
GO:0098588	C	bounding membrane of organelle	32	1213	0.0002	0.0057
GO:0005802	C	trans-Golgi network	12	256	0.00021	0.0058
GO:0044459	C	plasma membrane part	16	428	0.00025	0.0064
GO:0044431	C	Golgi apparatus part	18	567	0.0007	0.017
GO:0044429	C	mitochondrial part	16	486	0.00094	0.02
GO:0098791	C	Golgi subcompartment	12	303	0.0009	0.02
GO:0005768	C	endosome	14	405	0.0012	0.026
GO:0031226	C	intrinsic component of plasma membrane	11	292	0.0021	0.042

## Sheet: TableS6-7
Supplementary Table S6-7. Gene ontology (GO) enrichment analysis for cluster 7 of DEGs of Brachypodium distachyon during PTI (0, 0.5, 1, 3, 6, and 12 h) in response to flg22
GO term	Ontology	Description	Number in input list	Number in BG/Ref	p-value	FDR
GO:0044699	P	single-organism process	176	9448	7.3e-10	8.5e-07
GO:0016310	P	phosphorylation	45	1254	7.2e-10	8.5e-07
GO:0009699	P	phenylpropanoid biosynthetic process	14	121	1.7e-09	9.1e-07
GO:0006468	P	protein phosphorylation	37	936	2.3e-09	9.1e-07
GO:0006793	P	phosphorus metabolic process	54	1751	2.3e-09	9.1e-07
GO:0044710	P	single-organism metabolic process	94	3970	1.2e-09	9.1e-07
GO:0006796	P	phosphate-containing compound metabolic process	53	1735	4.6e-09	1.5e-06
GO:0006464	P	cellular protein modification process	59	2126	1.7e-08	4.3e-06
GO:0036211	P	protein modification process	59	2126	1.7e-08	4.3e-06
GO:0044711	P	single-organism biosynthetic process	51	1735	3.1e-08	7.3e-06
GO:0044550	P	secondary metabolite biosynthetic process	19	311	4.4e-08	9.3e-06
GO:0009698	P	phenylpropanoid metabolic process	14	164	6.1e-08	1.2e-05
GO:0043412	P	macromolecule modification	64	2532	1.1e-07	1.9e-05
GO:0008152	P	metabolic process	202	12035	1.1e-07	1.9e-05
GO:0019748	P	secondary metabolic process	22	492	6.7e-07	0.0001
GO:0050896	P	response to stimulus	119	6250	1e-06	0.00014
GO:0044763	P	single-organism cellular process	124	6591	9.7e-07	0.00014
GO:0009073	P	aromatic amino acid family biosynthetic process	7	47	4.8e-06	0.00062
GO:0009809	P	lignin biosynthetic process	8	70	6e-06	0.00074
GO:0071704	P	organic substance metabolic process	176	10672	8.1e-06	0.00094
GO:0044237	P	cellular metabolic process	164	9879	1.6e-05	0.0018
GO:0045087	P	innate immune response	15	323	2.7e-05	0.0028
GO:0009072	P	aromatic amino acid family metabolic process	7	63	2.7e-05	0.0028
GO:0006955	P	immune response	15	333	3.7e-05	0.0036
GO:0044283	P	small molecule biosynthetic process	22	653	4.8e-05	0.0043
GO:0009808	P	lignin metabolic process	8	95	4.7e-05	0.0043
GO:0055085	P	transmembrane transport	22	667	6.5e-05	0.0056
GO:0051817	P	modification of morphology or physiology of other organism involved in symbiotic interaction	5	31	8.1e-05	0.0066
GO:0009987	P	cellular process	198	12771	8.3e-05	0.0066
GO:0002376	P	immune system process	15	369	0.00011	0.0087
GO:0042221	P	response to chemical	59	2853	0.00014	0.011
GO:0045089	P	positive regulation of innate immune response	6	59	0.00016	0.012
GO:0044281	P	small molecule metabolic process	38	1597	0.00019	0.013
GO:0002684	P	positive regulation of immune system process	6	62	0.00021	0.014
GO:0051707	P	response to other organism	31	1210	0.00022	0.014
GO:0050778	P	positive regulation of immune response	6	62	0.00021	0.014
GO:0006082	P	organic acid metabolic process	29	1099	0.00022	0.014
GO:0043207	P	response to external biotic stimulus	31	1212	0.00023	0.014
GO:0007166	P	cell surface receptor signaling pathway	11	234	0.00028	0.016
GO:0051704	P	multi-organism process	38	1631	0.00028	0.016
GO:0007167	P	enzyme linked receptor protein signaling pathway	8	130	0.00036	0.02
GO:0007169	P	transmembrane receptor protein tyrosine kinase signaling pathway	8	130	0.00036	0.02
GO:1902531	P	regulation of intracellular signal transduction	5	44	0.00036	0.02
GO:0051179	P	localization	52	2517	0.00037	0.02
GO:0009607	P	response to biotic stimulus	31	1253	0.00039	0.02
GO:0006950	P	response to stress	67	3506	0.00043	0.022
GO:0048583	P	regulation of response to stimulus	18	565	0.00044	0.022
GO:0055114	P	oxidation-reduction process	36	1566	0.00051	0.025
GO:0009624	P	response to nematode	6	76	0.00058	0.027
GO:0016053	P	organic acid biosynthetic process	17	531	0.0006	0.028
GO:0044712	P	single-organism catabolic process	18	585	0.00066	0.03
GO:0006810	P	transport	49	2391	0.00067	0.03
GO:0051234	P	establishment of localization	49	2406	0.00076	0.033
GO:0012501	P	programmed cell death	8	147	0.00077	0.033
GO:0065008	P	regulation of biological quality	30	1255	0.00083	0.035
GO:0043436	P	oxoacid metabolic process	25	973	0.00086	0.035
GO:0019752	P	carboxylic acid metabolic process	23	864	0.00087	0.035
GO:0031349	P	positive regulation of defense response	6	84	0.00094	0.037
GO:0009626	P	plant-type hypersensitive response	6	84	0.00094	0.037
GO:0034050	P	host programmed cell death induced by symbiont	6	85	0.001	0.038
GO:0006952	P	defense response	35	1566	0.001	0.038
GO:0031347	P	regulation of defense response	10	233	0.001	0.039
GO:0008219	P	cell death	9	194	0.0011	0.04
GO:0010033	P	response to organic substance	42	2023	0.0013	0.047
GO:0034976	P	response to endoplasmic reticulum stress	5	60	0.0013	0.047
GO:0003824	F	catalytic activity	188	9101	2.5e-15	1.6e-12
GO:0016740	F	transferase activity	100	3791	5.8e-13	1.8e-10
GO:0004672	F	protein kinase activity	37	925	1.7e-09	3.5e-07
GO:0016773	F	phosphotransferase activity, alcohol group as acceptor	39	1072	7.5e-09	1.2e-06
GO:0004674	F	protein serine/threonine kinase activity	31	767	3e-08	3.8e-06
GO:0016301	F	kinase activity	43	1436	2.6e-07	2.7e-05
GO:0005524	F	ATP binding	56	2248	1.2e-06	0.00011
GO:0030246	F	carbohydrate binding	16	303	3.1e-06	0.00024
GO:0032559	F	adenyl ribonucleotide binding	56	2364	5.4e-06	0.00035
GO:0030554	F	adenyl nucleotide binding	56	2366	5.6e-06	0.00035
GO:0022857	F	transmembrane transporter activity	34	1146	6.2e-06	0.00035
GO:0016772	F	transferase activity, transferring phosphorus-containing groups	43	1657	9.4e-06	0.00049
GO:0022804	F	active transmembrane transporter activity	22	595	1.2e-05	0.0006
GO:0005215	F	transporter activity	38	1406	1.4e-05	0.00061
GO:0035639	F	purine ribonucleoside triphosphate binding	57	2515	1.6e-05	0.00066
GO:0005402	F	cation:sugar symporter activity	8	95	4.7e-05	0.0013
GO:0032553	F	ribonucleotide binding	58	2664	4.1e-05	0.0013
GO:0022892	F	substrate-specific transporter activity	30	1045	4e-05	0.0013
GO:0001882	F	nucleoside binding	57	2618	4.8e-05	0.0013
GO:0001883	F	purine nucleoside binding	57	2612	4.5e-05	0.0013
GO:0005351	F	sugar:proton symporter activity	8	95	4.7e-05	0.0013
GO:0032550	F	purine ribonucleoside binding	57	2612	4.5e-05	0.0013
GO:0032549	F	ribonucleoside binding	57	2617	4.7e-05	0.0013
GO:0017076	F	purine nucleotide binding	57	2633	5.6e-05	0.0013
GO:0032555	F	purine ribonucleotide binding	57	2631	5.5e-05	0.0013
GO:0097367	F	carbohydrate derivative binding	58	2696	5.6e-05	0.0013
GO:0015295	F	solute:proton symporter activity	8	97	5.4e-05	0.0013
GO:0036094	F	small molecule binding	68	3434	0.00014	0.0032
GO:0022891	F	substrate-specific transmembrane transporter activity	26	916	0.00016	0.0034
GO:0051119	F	sugar transmembrane transporter activity	8	118	0.00019	0.004
GO:0000166	F	nucleotide binding	66	3370	0.00025	0.0046
GO:1901265	F	nucleoside phosphate binding	66	3370	0.00025	0.0046
GO:1901476	F	carbohydrate transporter activity	8	123	0.00025	0.0046
GO:0015144	F	carbohydrate transmembrane transporter activity	8	123	0.00025	0.0046
GO:0046906	F	tetrapyrrole binding	15	402	0.00027	0.0049
GO:0015294	F	solute:cation symporter activity	8	128	0.00032	0.0056
GO:0016757	F	transferase activity, transferring glycosyl groups	20	654	0.00036	0.0059
GO:0038023	F	signaling receptor activity	9	165	0.00036	0.0059
GO:0005488	F	binding	185	12081	0.00043	0.0069
GO:0060089	F	molecular transducer activity	10	209	0.00047	0.0069
GO:0015293	F	symporter activity	9	171	0.00046	0.0069
GO:0004872	F	receptor activity	10	209	0.00047	0.0069
GO:0016758	F	transferase activity, transferring hexosyl groups	14	382	0.00051	0.0075
GO:0015291	F	secondary active transmembrane transporter activity	13	338	0.00053	0.0075
GO:0015075	F	ion transmembrane transporter activity	19	629	0.00058	0.0081
GO:0020037	F	heme binding	13	360	0.00092	0.013
GO:0042802	F	identical protein binding	10	236	0.0011	0.015
GO:0005515	F	protein binding	67	3669	0.0014	0.018
GO:0043167	F	ion binding	69	3821	0.0016	0.02
GO:0016747	F	transferase activity, transferring acyl groups other than amino-acyl groups	12	348	0.0021	0.026
GO:0061630	F	ubiquitin protein ligase activity	7	140	0.0026	0.031
GO:0080044	F	quercetin 7-O-glucosyltransferase activity	5	71	0.0027	0.031
GO:0061659	F	ubiquitin-like protein ligase activity	7	140	0.0026	0.031
GO:0080043	F	quercetin 3-O-glucosyltransferase activity	5	71	0.0027	0.031
GO:0016491	F	oxidoreductase activity	33	1547	0.0029	0.032
GO:0008324	F	cation transmembrane transporter activity	14	464	0.003	0.034
GO:0008194	F	UDP-glycosyltransferase activity	10	273	0.0032	0.035
GO:0051082	F	unfolded protein binding	5	81	0.0045	0.049
GO:0071944	C	cell periphery	116	4309	7.2e-16	3.3e-13
GO:0016020	C	membrane	179	8532	5.8e-15	1.3e-12
GO:0031224	C	intrinsic component of membrane	132	5540	3.6e-14	5.5e-12
GO:0044425	C	membrane part	138	5962	6.2e-14	7.1e-12
GO:0016021	C	integral component of membrane	126	5324	3.3e-13	3e-11
GO:0005886	C	plasma membrane	99	3735	6e-13	4.6e-11
GO:0005783	C	endoplasmic reticulum	38	895	2e-10	1.3e-08
GO:0044432	C	endoplasmic reticulum part	25	440	1.3e-09	7.2e-08
GO:0012505	C	endomembrane system	62	2143	1.4e-09	7.2e-08
GO:0005788	C	endoplasmic reticulum lumen	8	42	1.9e-07	8.6e-06
GO:0005789	C	endoplasmic reticulum membrane	18	399	6.2e-06	0.00026
GO:0042175	C	nuclear outer membrane-endoplasmic reticulum membrane network	18	404	7.3e-06	0.00028
GO:0005773	C	vacuole	37	1359	1.5e-05	0.00053
GO:0098588	C	bounding membrane of organelle	33	1213	4.5e-05	0.0015
GO:0044464	C	cell part	315	22662	6.7e-05	0.0019
GO:0005623	C	cell	315	22664	6.8e-05	0.0019
GO:0030054	C	cell junction	26	901	0.00012	0.0028
GO:0005911	C	cell-cell junction	26	901	0.00012	0.0028
GO:0009506	C	plasmodesma	26	899	0.00012	0.0028
GO:0055044	C	symplast	26	899	0.00012	0.0028
GO:0030312	C	external encapsulating structure	22	706	0.00014	0.003
GO:0005618	C	cell wall	22	706	0.00014	0.003
GO:0044437	C	vacuolar part	22	725	0.00021	0.0041
GO:0031090	C	organelle membrane	40	1760	0.00031	0.006
GO:0044422	C	organelle part	87	4894	0.00054	0.0099
GO:0044446	C	intracellular organelle part	86	4882	0.00078	0.014
GO:0005774	C	vacuolar membrane	20	720	0.0011	0.019
GO:0098805	C	whole membrane	23	925	0.0021	0.034
GO:0098791	C	Golgi subcompartment	11	303	0.0021	0.034

## Sheet: TableS6-8
Supplementary Table S6-8. Gene ontology (GO) enrichment analysis for cluster 8 of DEGs of Brachypodium distachyon during PTI (0, 0.5, 1, 3, 6, and 12 h) in response to flg22
GO term	Ontology	Description	Number in input list	Number in BG/Ref	p-value	FDR
GO:0044248	P	cellular catabolic process	68	1024	8.7e-15	3.1e-11
GO:0009056	P	catabolic process	80	1430	2e-13	3.6e-10
GO:1901575	P	organic substance catabolic process	70	1249	7e-12	8.3e-09
GO:0008152	P	metabolic process	353	12035	1.4e-11	1.2e-08
GO:0044699	P	single-organism process	291	9448	3.7e-11	2.7e-08
GO:0044710	P	single-organism metabolic process	146	3970	9.3e-10	5.5e-07
GO:0044282	P	small molecule catabolic process	18	162	9.4e-08	4.8e-05
GO:0071704	P	organic substance metabolic process	303	10672	1.1e-07	4.9e-05
GO:0009057	P	macromolecule catabolic process	41	747	3.2e-07	0.00012
GO:0016054	P	organic acid catabolic process	15	121	3.1e-07	0.00012
GO:0050896	P	response to stimulus	194	6250	3.7e-07	0.00012
GO:0044281	P	small molecule metabolic process	68	1597	5.2e-07	0.00014
GO:1901565	P	organonitrogen compound catabolic process	17	164	5.2e-07	0.00014
GO:0044265	P	cellular macromolecule catabolic process	33	541	5.3e-07	0.00014
GO:0046395	P	carboxylic acid catabolic process	13	105	1.9e-06	0.00045
GO:0006508	P	proteolysis	44	907	2.8e-06	0.00062
GO:0044712	P	single-organism catabolic process	32	585	6.8e-06	0.0014
GO:0044237	P	cellular metabolic process	274	9879	7.2e-06	0.0014
GO:0009628	P	response to abiotic stimulus	76	2022	9.3e-06	0.0017
GO:0044763	P	single-organism cellular process	194	6591	1.3e-05	0.0023
GO:0005975	P	carbohydrate metabolic process	49	1144	1.9e-05	0.0032
GO:0010035	P	response to inorganic substance	42	926	2.2e-05	0.0035
GO:0044238	P	primary metabolic process	271	9890	2.3e-05	0.0035
GO:0051603	P	proteolysis involved in cellular protein catabolic process	25	435	3.2e-05	0.0048
GO:0030163	P	protein catabolic process	26	467	3.7e-05	0.0053
GO:0044257	P	cellular protein catabolic process	25	444	4.4e-05	0.0058
GO:0042221	P	response to chemical	96	2853	4.3e-05	0.0058
GO:0009063	P	cellular amino acid catabolic process	8	53	5.2e-05	0.0066
GO:0009987	P	cellular process	334	12771	5.8e-05	0.0071
GO:0080167	P	response to karrikin	12	128	6e-05	0.0071
GO:0006950	P	response to stress	112	3506	7.5e-05	0.0087
GO:0070647	P	protein modification by small protein conjugation or removal	30	610	8.5e-05	0.0095
GO:0019439	P	aromatic compound catabolic process	14	178	8.9e-05	0.0096
GO:0055114	P	oxidation-reduction process	59	1566	9.3e-05	0.0098
GO:0019752	P	carboxylic acid metabolic process	38	864	9.8e-05	0.01
GO:1901361	P	organic cyclic compound catabolic process	14	183	0.00012	0.012
GO:0006082	P	organic acid metabolic process	44	1099	0.00021	0.021
GO:0043632	P	modification-dependent macromolecule catabolic process	21	380	0.00022	0.021
GO:0043436	P	oxoacid metabolic process	40	973	0.00025	0.023
GO:0006551	P	leucine metabolic process	5	22	0.00026	0.023
GO:0072329	P	monocarboxylic acid catabolic process	7	52	0.00029	0.025
GO:0006979	P	response to oxidative stress	23	453	0.00036	0.031
GO:0032446	P	protein modification by small protein conjugation	26	550	0.00044	0.036
GO:0006511	P	ubiquitin-dependent protein catabolic process	20	376	0.00049	0.04
GO:0016567	P	protein ubiquitination	25	526	0.00052	0.041
GO:0019941	P	modification-dependent protein catabolic process	20	378	0.00053	0.041
GO:0003824	F	catalytic activity	307	9101	1.4e-17	1.3e-14
GO:0043167	F	ion binding	138	3821	9.6e-09	4.3e-06
GO:0046872	F	metal ion binding	131	3673	5.2e-08	1.3e-05
GO:0043169	F	cation binding	131	3678	5.6e-08	1.3e-05
GO:0016740	F	transferase activity	125	3791	6.1e-06	0.0011
GO:0016787	F	hydrolase activity	109	3279	2e-05	0.003
GO:0046914	F	transition metal ion binding	69	1912	8.3e-05	0.011
GO:0005488	F	binding	314	12081	0.00023	0.023
GO:0016491	F	oxidoreductase activity	57	1547	0.00021	0.023
GO:0004842	F	ubiquitin-protein transferase activity	21	387	0.00028	0.025
GO:0008270	F	zinc ion binding	49	1297	0.00035	0.026
GO:0019787	F	ubiquitin-like protein transferase activity	21	393	0.00034	0.026
GO:0070011	F	peptidase activity, acting on L-amino acid peptides	23	458	0.00042	0.029
GO:0019200	F	carbohydrate kinase activity	6	41	0.00053	0.034
GO:0016773	F	phosphotransferase activity, alcohol group as acceptor	41	1072	0.00083	0.044
GO:0004175	F	endopeptidase activity	14	225	0.00083	0.044
GO:0008233	F	peptidase activity	25	544	0.00082	0.044
GO:0044464	C	cell part	572	22662	5.8e-13	1.7e-10
GO:0005623	C	cell	572	22664	6e-13	1.7e-10
GO:0044424	C	intracellular part	518	20693	9.8e-08	1.4e-05
GO:0005622	C	intracellular	519	20721	7.8e-08	1.4e-05
GO:0005773	C	vacuole	61	1359	4e-07	4.5e-05
GO:0005737	C	cytoplasm	355	13406	5.6e-06	0.00053
GO:0005829	C	cytosol	74	1993	1.8e-05	0.0012
GO:0043231	C	intracellular membrane-bounded organelle	455	18205	2.3e-05	0.0012
GO:0005777	C	peroxisome	18	247	2.4e-05	0.0012
GO:0043227	C	membrane-bounded organelle	456	18217	1.7e-05	0.0012
GO:0042579	C	microbody	18	247	2.4e-05	0.0012
GO:0071944	C	cell periphery	135	4309	2.8e-05	0.0013
GO:0005774	C	vacuolar membrane	34	720	6.2e-05	0.0027
GO:0044437	C	vacuolar part	34	725	7.1e-05	0.0028
GO:0043226	C	organelle	458	18527	8.6e-05	0.0032
GO:0043229	C	intracellular organelle	457	18517	0.00011	0.004
GO:0098805	C	whole membrane	39	925	0.00018	0.006
GO:0044444	C	cytoplasmic part	285	10923	0.00049	0.015
GO:0030312	C	external encapsulating structure	30	706	0.00088	0.025
GO:0005618	C	cell wall	30	706	0.00088	0.025
GO:0098588	C	bounding membrane of organelle	44	1213	0.0015	0.04
GO:0005759	C	mitochondrial matrix	9	116	0.0017	0.044

## Sheet: TableS6-9
Supplementary Table S6-9. Gene ontology (GO) enrichment analysis for cluster 9 of DEGs of Brachypodium distachyon during PTI (0, 0.5, 1, 3, 6, and 12 h) in response to flg22
GO term	Ontology	Description	Number in input list	Number in BG/Ref	p-value	FDR
GO:0008152	P	metabolic process	266	12035	4.4e-09	6.5e-06
GO:0090304	P	nucleic acid metabolic process	111	3768	3.2e-09	6.5e-06
GO:0044699	P	single-organism process	218	9448	1.8e-08	1.1e-05
GO:1901360	P	organic cyclic compound metabolic process	128	4700	1.5e-08	1.1e-05
GO:0006725	P	cellular aromatic compound metabolic process	126	4588	1.3e-08	1.1e-05
GO:0043412	P	macromolecule modification	81	2532	2.6e-08	1.3e-05
GO:0006139	P	nucleobase-containing compound metabolic process	116	4178	3.4e-08	1.4e-05
GO:0046483	P	heterocycle metabolic process	120	4433	7.2e-08	2.4e-05
GO:0071704	P	organic substance metabolic process	237	10672	7.1e-08	2.4e-05
GO:0050896	P	response to stimulus	155	6250	1.2e-07	3.2e-05
GO:0044260	P	cellular macromolecule metabolic process	177	7410	1.2e-07	3.2e-05
GO:0044238	P	primary metabolic process	222	9890	1.3e-07	3.2e-05
GO:0009451	P	RNA modification	20	294	3.5e-07	7.9e-05
GO:0043170	P	macromolecule metabolic process	187	8111	5.2e-07	0.00011
GO:0044237	P	cellular metabolic process	217	9879	1.2e-06	0.00022
GO:0016070	P	RNA metabolic process	94	3403	1.2e-06	0.00022
GO:0009987	P	cellular process	267	12771	1.3e-06	0.00022
GO:0032501	P	multicellular organismal process	85	3032	2.6e-06	0.00042
GO:0048856	P	anatomical structure development	87	3146	3.3e-06	0.00051
GO:0044707	P	single-multicellular organism process	81	2875	3.9e-06	0.00058
GO:0032502	P	developmental process	88	3233	5.2e-06	0.00074
GO:0000723	P	telomere maintenance	7	37	7.3e-06	0.00095
GO:0032200	P	telomere organization	7	37	7.3e-06	0.00095
GO:0044767	P	single-organism developmental process	85	3131	8.6e-06	0.001
GO:0060249	P	anatomical structure homeostasis	7	38	8.5e-06	0.001
GO:0009790	P	embryo development	26	571	8.7e-06	0.001
GO:0007275	P	multicellular organism development	78	2811	1e-05	0.0011
GO:0065007	P	biological regulation	141	6062	2e-05	0.0021
GO:0006955	P	immune response	18	333	2.6e-05	0.0027
GO:0006259	P	DNA metabolic process	24	539	2.7e-05	0.0027
GO:0002376	P	immune system process	19	369	3e-05	0.0029
GO:0006950	P	response to stress	90	3506	3.7e-05	0.0034
GO:0050789	P	regulation of biological process	125	5306	4.1e-05	0.0036
GO:0051276	P	chromosome organization	22	482	4.1e-05	0.0036
GO:0045087	P	innate immune response	17	323	6e-05	0.0051
GO:0042592	P	homeostatic process	23	542	8e-05	0.0066
GO:0014070	P	response to organic cyclic compound	19	405	9.7e-05	0.0078
GO:0043207	P	response to external biotic stimulus	39	1212	0.00013	0.0092
GO:0009607	P	response to biotic stimulus	40	1253	0.00012	0.0092
GO:0051707	P	response to other organism	39	1210	0.00012	0.0092
GO:0048731	P	system development	55	1929	0.00012	0.0092
GO:0051716	P	cellular response to stimulus	74	2856	0.00015	0.011
GO:0043331	P	response to dsRNA	6	46	0.00021	0.014
GO:0031050	P	dsRNA fragmentation	6	46	0.00021	0.014
GO:0070918	P	production of small RNA involved in gene silencing by RNA	6	46	0.00021	0.014
GO:0071359	P	cellular response to dsRNA	6	46	0.00021	0.014
GO:0043269	P	regulation of ion transport	6	47	0.00024	0.015
GO:0006952	P	defense response	46	1566	0.00024	0.015
GO:0009793	P	embryo development ending in seed dormancy	20	478	0.00027	0.016
GO:0050794	P	regulation of cellular process	112	4857	0.00028	0.016
GO:0009791	P	post-embryonic development	46	1576	0.00028	0.016
GO:0009605	P	response to external stimulus	46	1582	0.0003	0.017
GO:0098542	P	defense response to other organism	31	936	0.00039	0.022
GO:0008219	P	cell death	11	194	0.00066	0.035
GO:0042221	P	response to chemical	71	2853	0.00065	0.035
GO:0006464	P	cellular protein modification process	56	2126	0.00072	0.038
GO:0036211	P	protein modification process	56	2126	0.00072	0.038
GO:0048364	P	root development	19	482	0.00077	0.04
GO:0022622	P	root system development	19	484	0.00081	0.04
GO:0006468	P	protein phosphorylation	30	936	0.0008	0.04
GO:0071103	P	DNA conformation change	7	85	0.00085	0.041
GO:0000003	P	reproduction	47	1721	0.00096	0.046
GO:0006396	P	RNA processing	24	693	0.00097	0.046
GO:0051704	P	multi-organism process	45	1631	0.001	0.047
GO:0003006	P	developmental process involved in reproduction	42	1496	0.0011	0.049
GO:1901699	P	cellular response to nitrogen compound	7	89	0.0011	0.049
GO:0003824	F	catalytic activity	230	9101	3e-13	2.2e-10
GO:0004519	F	endonuclease activity	24	255	5.9e-11	2.1e-08
GO:0005524	F	ATP binding	79	2248	7.1e-10	1.3e-07
GO:0030554	F	adenyl nucleotide binding	82	2366	6e-10	1.3e-07
GO:0032559	F	adenyl ribonucleotide binding	81	2364	1.3e-09	1.9e-07
GO:0097159	F	organic cyclic compound binding	188	7737	8.6e-09	1e-06
GO:1901363	F	heterocyclic compound binding	187	7718	1.2e-08	1.3e-06
GO:0017076	F	purine nucleotide binding	84	2633	1.5e-08	1.4e-06
GO:0035639	F	purine ribonucleoside triphosphate binding	81	2515	1.9e-08	1.5e-06
GO:0032555	F	purine ribonucleotide binding	83	2631	3e-08	2e-06
GO:0004518	F	nuclease activity	24	356	2.8e-08	2e-06
GO:0032549	F	ribonucleoside binding	82	2617	5e-08	2.1e-06
GO:0032553	F	ribonucleotide binding	83	2664	5.1e-08	2.1e-06
GO:0001882	F	nucleoside binding	82	2618	5e-08	2.1e-06
GO:0001883	F	purine nucleoside binding	82	2612	4.6e-08	2.1e-06
GO:0005488	F	binding	262	12081	5.3e-08	2.1e-06
GO:0032550	F	purine ribonucleoside binding	82	2612	4.6e-08	2.1e-06
GO:0097367	F	carbohydrate derivative binding	84	2696	4.2e-08	2.1e-06
GO:1901265	F	nucleoside phosphate binding	98	3370	6.6e-08	2.4e-06
GO:0000166	F	nucleotide binding	98	3370	6.6e-08	2.4e-06
GO:0036094	F	small molecule binding	99	3434	8.4e-08	2.9e-06
GO:0016787	F	hydrolase activity	91	3279	1.6e-06	5.2e-05
GO:0005515	F	protein binding	96	3669	8.8e-06	0.00028
GO:0016788	F	hydrolase activity, acting on ester bonds	38	1131	6.6e-05	0.002
GO:0004672	F	protein kinase activity	33	925	6.8e-05	0.002
GO:0016773	F	phosphotransferase activity, alcohol group as acceptor	35	1072	0.00022	0.0058
GO:0016740	F	transferase activity	92	3791	0.00022	0.0058
GO:0046873	F	metal ion transmembrane transporter activity	13	235	0.00027	0.0071
GO:0043167	F	ion binding	90	3821	0.00067	0.017
GO:0004386	F	helicase activity	11	197	0.00074	0.018
GO:0016772	F	transferase activity, transferring phosphorus-containing groups	46	1657	0.00078	0.018
GO:0004674	F	protein serine/threonine kinase activity	26	767	0.00082	0.019
GO:0046872	F	metal ion binding	85	3673	0.0016	0.035
GO:0043169	F	cation binding	85	3678	0.0017	0.035
GO:0043531	F	ADP binding	9	157	0.0019	0.038
GO:0005215	F	transporter activity	39	1406	0.002	0.04
GO:0022857	F	transmembrane transporter activity	33	1146	0.0025	0.048
GO:0044464	C	cell part	422	22662	5.6e-07	0.00015
GO:0005623	C	cell	422	22664	5.7e-07	0.00015
GO:0044422	C	organelle part	120	4894	1e-05	0.0013
GO:0071944	C	cell periphery	108	4309	1.4e-05	0.0013
GO:0043227	C	membrane-bounded organelle	349	18217	2.3e-05	0.0013
GO:0000781	C	chromosome, telomeric region	6	30	2.5e-05	0.0013
GO:0044446	C	intracellular organelle part	120	4882	9.4e-06	0.0013
GO:0043231	C	intracellular membrane-bounded organelle	349	18205	2.1e-05	0.0013
GO:0005886	C	plasma membrane	96	3735	1.8e-05	0.0013
GO:0031981	C	nuclear lumen	32	824	1.9e-05	0.0013
GO:0044428	C	nuclear part	37	1078	5.4e-05	0.0025
GO:0070013	C	intracellular organelle lumen	35	1008	6.9e-05	0.0026
GO:0031974	C	membrane-enclosed lumen	35	1008	6.9e-05	0.0026
GO:0043233	C	organelle lumen	35	1008	6.9e-05	0.0026
GO:0016604	C	nuclear body	9	103	0.0001	0.0034
GO:0043229	C	intracellular organelle	350	18517	0.00011	0.0034
GO:0043226	C	organelle	350	18527	0.00011	0.0034
GO:0000784	C	nuclear chromosome, telomeric region	5	25	0.00012	0.0035
GO:0005622	C	intracellular	381	20721	0.00038	0.01
GO:0044424	C	intracellular part	380	20693	0.00047	0.012
GO:0005694	C	chromosome	15	323	0.00057	0.014
GO:0044427	C	chromosomal part	13	259	0.00066	0.016
GO:0098687	C	chromosomal region	7	85	0.00085	0.019
GO:0005773	C	vacuole	39	1359	0.0011	0.024
GO:0044454	C	nuclear chromosome part	8	125	0.0017	0.035

## Sheet: TableS6-10
Supplementary Table S6-10. Gene ontology (GO) enrichment analysis for cluster 10 of DEGs of Brachypodium distachyon during PTI (0, 0.5, 1, 3, 6, and 12 h) in response to flg22
GO term	Ontology	Description	Number in input list	Number in BG/Ref	p-value	FDR
GO:0009657	P	plastid organization	27	207	5.3e-14	1.7e-10
GO:0008152	P	metabolic process	300	12035	6.6e-10	1.1e-06
GO:0009658	P	chloroplast organization	18	150	2.9e-09	3.2e-06
GO:0044699	P	single-organism process	245	9448	4.7e-09	3.8e-06
GO:0071704	P	organic substance metabolic process	268	10672	1e-08	6.6e-06
GO:0044237	P	cellular metabolic process	250	9879	2.9e-08	1.4e-05
GO:1901360	P	organic cyclic compound metabolic process	140	4700	3.1e-08	1.4e-05
GO:0006725	P	cellular aromatic compound metabolic process	136	4588	7e-08	2.8e-05
GO:0046483	P	heterocycle metabolic process	132	4433	9.1e-08	3.3e-05
GO:0044763	P	single-organism cellular process	179	6591	1.2e-07	3.9e-05
GO:0044238	P	primary metabolic process	247	9890	1.3e-07	4e-05
GO:0006139	P	nucleobase-containing compound metabolic process	125	4178	1.8e-07	4.8e-05
GO:0044710	P	single-organism metabolic process	118	3970	6.1e-07	0.00013
GO:0044711	P	single-organism biosynthetic process	64	1735	5.6e-07	0.00013
GO:0009987	P	cellular process	300	12771	6e-07	0.00013
GO:0015979	P	photosynthesis	19	253	1e-06	0.00021
GO:0000373	P	Group II intron splicing	6	14	1.3e-06	0.00023
GO:0090304	P	nucleic acid metabolic process	112	3768	1.3e-06	0.00023
GO:0016070	P	RNA metabolic process	103	3403	1.8e-06	0.0003
GO:0009416	P	response to light stimulus	34	744	4.9e-06	0.00075
GO:0050896	P	response to stimulus	164	6250	4.6e-06	0.00075
GO:0031425	P	chloroplast RNA processing	6	19	5.4e-06	0.00079
GO:0009314	P	response to radiation	34	772	1e-05	0.0014
GO:0006396	P	RNA processing	31	693	1.9e-05	0.0025
GO:0044702	P	single organism reproductive process	54	1544	2e-05	0.0025
GO:0010109	P	regulation of photosynthesis	7	39	2.2e-05	0.0027
GO:0009791	P	post-embryonic development	54	1576	3.4e-05	0.004
GO:0048608	P	reproductive structure development	45	1265	6.8e-05	0.0076
GO:0061458	P	reproductive system development	45	1265	6.8e-05	0.0076
GO:0022414	P	reproductive process	56	1715	8.4e-05	0.009
GO:0009451	P	RNA modification	17	294	8.7e-05	0.009
GO:0000003	P	reproduction	56	1721	9.2e-05	0.0093
GO:0003006	P	developmental process involved in reproduction	50	1496	0.00012	0.012
GO:0050789	P	regulation of biological process	136	5306	0.00013	0.012
GO:0009628	P	response to abiotic stimulus	62	2022	0.00019	0.017
GO:0016108	P	tetraterpenoid metabolic process	6	42	0.00026	0.021
GO:0009637	P	response to blue light	8	81	0.00026	0.021
GO:0016116	P	carotenoid metabolic process	6	42	0.00026	0.021
GO:0006807	P	nitrogen compound metabolic process	154	6241	0.00024	0.021
GO:0009112	P	nucleobase metabolic process	6	42	0.00026	0.021
GO:0043170	P	macromolecule metabolic process	192	8111	0.00027	0.022
GO:0044281	P	small molecule metabolic process	51	1597	0.00029	0.023
GO:0042886	P	amide transport	8	83	0.0003	0.023
GO:0019222	P	regulation of metabolic process	87	3181	0.00041	0.029
GO:0006996	P	organelle organization	44	1335	0.00041	0.029
GO:0032502	P	developmental process	88	3233	0.00044	0.031
GO:0006721	P	terpenoid metabolic process	10	137	0.00046	0.031
GO:0044283	P	small molecule biosynthetic process	26	653	0.00049	0.032
GO:0016071	P	mRNA metabolic process	19	409	0.00049	0.032
GO:0009630	P	gravitropism	7	68	0.0005	0.032
GO:0007275	P	multicellular organism development	78	2811	0.00056	0.036
GO:0048316	P	seed development	26	661	0.00059	0.037
GO:0044767	P	single-organism developmental process	85	3131	0.0006	0.037
GO:0010154	P	fruit development	27	702	0.00064	0.039
GO:0006720	P	isoprenoid metabolic process	11	172	0.00069	0.04
GO:0006397	P	mRNA processing	16	324	0.00073	0.042
GO:0006082	P	organic acid metabolic process	37	1099	0.00081	0.046
GO:0048731	P	system development	57	1929	0.00082	0.046
GO:0003824	F	catalytic activity	242	9101	5.4e-10	4.4e-07
GO:0005488	F	binding	297	12081	5e-09	2e-06
GO:1901363	F	heterocyclic compound binding	202	7718	1.8e-07	4.4e-05
GO:0097159	F	organic cyclic compound binding	202	7737	2.2e-07	4.4e-05
GO:0004519	F	endonuclease activity	20	255	2.8e-07	4.5e-05
GO:0004518	F	nuclease activity	23	356	9e-07	0.00012
GO:0016787	F	hydrolase activity	101	3279	1.1e-06	0.00012
GO:0032553	F	ribonucleotide binding	85	2664	2.4e-06	0.00024
GO:0097367	F	carbohydrate derivative binding	85	2696	3.8e-06	0.00034
GO:0035639	F	purine ribonucleoside triphosphate binding	80	2515	5.6e-06	0.00045
GO:0005524	F	ATP binding	73	2248	7.7e-06	0.00052
GO:0036094	F	small molecule binding	101	3434	7.6e-06	0.00052
GO:1901265	F	nucleoside phosphate binding	99	3370	1e-05	0.00058
GO:0000166	F	nucleotide binding	99	3370	1e-05	0.00058
GO:0017076	F	purine nucleotide binding	81	2633	1.6e-05	0.0008
GO:0032555	F	purine ribonucleotide binding	81	2631	1.5e-05	0.0008
GO:0032549	F	ribonucleoside binding	80	2617	2.2e-05	0.00081
GO:0016788	F	hydrolase activity, acting on ester bonds	43	1131	2.3e-05	0.00081
GO:0032559	F	adenyl ribonucleotide binding	74	2364	2.2e-05	0.00081
GO:0032550	F	purine ribonucleoside binding	80	2612	2.1e-05	0.00081
GO:0001882	F	nucleoside binding	80	2618	2.3e-05	0.00081
GO:0001883	F	purine nucleoside binding	80	2612	2.1e-05	0.00081
GO:0030554	F	adenyl nucleotide binding	74	2366	2.3e-05	0.00081
GO:0048037	F	cofactor binding	23	451	3.5e-05	0.0012
GO:0022891	F	substrate-specific transmembrane transporter activity	35	916	0.00012	0.0039
GO:0022857	F	transmembrane transporter activity	39	1146	0.00048	0.015
GO:0022892	F	substrate-specific transporter activity	36	1045	0.00064	0.019
GO:0005215	F	transporter activity	44	1406	0.0011	0.033
GO:0015075	F	ion transmembrane transporter activity	24	629	0.0014	0.039
GO:0051213	F	dioxygenase activity	9	135	0.0016	0.043
GO:0009507	C	chloroplast	199	4148	1.7e-36	7.8e-34
GO:0009536	C	plastid	199	4213	1.4e-35	3.2e-33
GO:0044435	C	plastid part	95	1455	6.2e-25	9.5e-23
GO:0044434	C	chloroplast part	91	1419	2.3e-23	2.7e-21
GO:0009532	C	plastid stroma	63	774	4.7e-21	4.3e-19
GO:0009570	C	chloroplast stroma	57	740	4.2e-18	3.2e-16
GO:0044444	C	cytoplasmic part	293	10923	1.2e-13	7.8e-12
GO:0005737	C	cytoplasm	326	13406	7.2e-10	4.1e-08
GO:0009295	C	nucleoid	12	48	9.7e-10	4.9e-08
GO:0042646	C	plastid nucleoid	10	31	3.1e-09	1.4e-07
GO:0009941	C	chloroplast envelope	36	688	1.2e-07	5.1e-06
GO:0044464	C	cell part	476	22662	1.9e-07	6.9e-06
GO:0005623	C	cell	476	22664	2e-07	6.9e-06
GO:0009526	C	plastid envelope	36	707	2.3e-07	7.5e-06
GO:0009508	C	plastid chromosome	7	18	2.7e-07	8.3e-06
GO:0000229	C	cytoplasmic chromosome	7	19	3.7e-07	1e-05
GO:0009579	C	thylakoid	30	584	2e-06	5.4e-05
GO:0044422	C	organelle part	133	4894	1e-05	0.00024
GO:0031976	C	plastid thylakoid	26	509	1.1e-05	0.00024
GO:0009534	C	chloroplast thylakoid	26	508	1e-05	0.00024
GO:0044446	C	intracellular organelle part	132	4882	1.5e-05	0.00032
GO:0043227	C	membrane-bounded organelle	392	18217	2e-05	0.00041
GO:0043231	C	intracellular membrane-bounded organelle	391	18205	2.7e-05	0.00053
GO:0043226	C	organelle	395	18527	5.3e-05	0.001
GO:0031969	C	chloroplast membrane	16	259	6.7e-05	0.0012
GO:0043229	C	intracellular organelle	394	18517	7.2e-05	0.0013
GO:0042170	C	plastid membrane	16	265	8.6e-05	0.0015
GO:0044436	C	thylakoid part	22	463	0.00013	0.0022
GO:0034357	C	photosynthetic membrane	20	422	0.00028	0.0042
GO:0042651	C	thylakoid membrane	20	421	0.00027	0.0042
GO:0055035	C	plastid thylakoid membrane	19	401	0.00039	0.0056
GO:0009535	C	chloroplast thylakoid membrane	19	400	0.00038	0.0056
GO:0005622	C	intracellular	427	20721	0.00063	0.0088
GO:0044424	C	intracellular part	426	20693	0.00076	0.01
GO:0031975	C	envelope	37	1170	0.0023	0.029
GO:0031967	C	organelle envelope	37	1170	0.0023	0.029
GO:0031984	C	organelle subcompartment	28	817	0.0027	0.033
