# Supplementary material for: Time-series transcriptome of Brachypodium distachyon during bacterial flagellin-induced pattern-triggered immunity
Source: Front Plant Sci. 2022 Sep 15;13:1004184. doi: 10.3389/fpls.2022.1004184 (PMC9521188; doi:10.3389/fpls.2022.1004184)
Supplement: Supplementary Table 7 — Brachypodium distachyon all genes with their closest homologs of Arabidopsis thaliana and Oryza sativa, annotations as transcription factors, and number of cis-elements in promoter region (1kbp). [file Table_7.xlsx]

## Sheet: TableS7
Supplementary Table S7. Brachypodium distachyon all genes with their closest homologs of Arabidopsis thaliana and Oryza sativa, annotations as transcription factors, and number of cis-elements in promoter region (1kbp)
GeneID	Best hit in Arabidopsis thalianaa		Best hit in Oryza sativaa		TF-typeb		Number of cis element in 1kbp promoter region except for 'CG-1 element at least single count'c
							GCC-box	DRE-CRT	DRE-like	Myc-related	G-box	G-box-like	ABRE-like	ACTCAT-element	TGA-element	AtMyb1	AtMyb2	AtMyb3	AtMyb4	W-box	CG-1-element at least signel count	CG-1 element all count	AuxRE	Sph/RY-element
							AGCCGCC	(A/C)CCGAC	(A/G/T)(A/G) CCGACN(A/T)	CACATG	CACGTG	(A/C)ACGT(G/A)	(C/G/T)ACGTG(G/T)(A/C)	ACTCAT	TGACG	(A/C)TCC(A/T)ACC	TAAC(G/C)GTT	TAACTAAC	A(A/C)C(A/T)A(A/C)C	TTGAC(C/T)	(A/C/G)CGCG(T/C/G)	(A/C/G)CGCG(T/C/G)	TGTCTC	CATGCATG
Bradi1g00200	AT1G10360.1 | glutathione S-transferase TAU 18		LOC_Os10g38630.1 | glutathione S-transferase, putative, expressed		N/A		0	1	1	0	0	0	0	1	0	0	0	0	2	0	0	0	1	1
Bradi1g00210	AT1G71840.1 | transducin family protein / WD-40 repeat family protein		LOC_Os03g48090.1 | WD domain, G-beta repeat domain containing protein, expressed		N/A		0	0	0	0	0	0	0	0	0	0	0	0	0	0	1	2	0	0
Bradi1g00213	No hits found		LOC_Os05g40490.1 | zinc knuckle domain containing protein, expressed		N/A		0	0	0	0	0	0	0	1	1	0	0	0	0	0	1	2	0	0
Bradi1g00215	AT1G21320.1 | nucleotide binding;nucleic acid binding		LOC_Os08g43360.1 | RNA recognition motif containing protein, putative, expressed		N/A		0	0	0	2	0	1	0	2	0	0	0	0	1	3	0	0	1	0
Bradi1g00217	No hits found		No hits found		N/A		0	0	0	0	0	0	0	0	0	0	0	0	1	1	0	0	0	0
Bradi1g00219	AT1G07530.1 | SCARECROW-like 14		LOC_Os12g38490.1 | SCARECROW, putative, expressed		GRAS		0	0	0	2	1	0	0	0	0	0	0	0	2	1	0	0	0	0
Bradi1g00222	AT3G09310.1 |		LOC_Os02g15970.4 | alpha-hemolysin, putative, expressed		N/A		0	1	0	1	0	1	0	0	0	0	0	0	1	1	1	3	0	0
Bradi1g00234	AT3G07040.1 | NB-ARC domain-containing disease resistance protein		LOC_Os11g35580.1 | disease resistance protein RPM1, putative, expressed		N/A		0	0	0	0	0	0	0	0	0	0	0	0	0	0	0	0	1	0
Bradi1g00247	AT4G31360.1 | selenium binding		LOC_Os11g47770.1 | selT/selW/selH selenoprotein domain containing protein, expressed		N/A		0	0	0	1	0	1	0	0	0	1	0	0	1	1	1	4	0	0
Bradi1g00253	No hits found		No hits found		N/A		0	1	0	3	0	0	0	0	0	0	0	0	0	0	1	3	0	0
Bradi1g00260	AT4G29990.1 | Leucine-rich repeat transmembrane protein kinase protein		LOC_Os05g15720.1 | expressed protein		N/A		0	0	0	0	0	0	0	1	0	0	0	0	0	0	0	0	0	0
Bradi1g00266	AT4G38830.1 | cysteine-rich RLK (RECEPTOR-like protein kinase) 26		LOC_Os11g39450.1 | cysteine-rich receptor-like protein kinase 7 precursor, putative, expressed		N/A		0	0	0	0	0	0	1	0	1	0	0	0	2	0	1	1	0	0
Bradi1g00272	AT1G33110.1 | MATE efflux family protein		LOC_Os12g03260.1 | MATE efflux family protein, putative, expressed		N/A		0	0	0	0	0	1	0	0	0	0	0	0	1	0	0	0	0	0
Bradi1g00278	AT3G14470.1 | NB-ARC domain-containing disease resistance protein		LOC_Os11g47780.1 | pollen signalling protein with adenylyl cyclase activity, putative, expressed		N/A		0	1	1	0	0	0	0	0	0	1	0	0	0	0	1	2	0	0
Bradi1g00284	AT3G14460.1 | LRR and NB-ARC domains-containing disease resistance protein		LOC_Os04g53496.1 | NBS-LRR disease resistance protein, putative, expressed		N/A		0	0	0	1	1	0	2	1	1	0	0	0	4	0	1	1	0	1
Bradi1g00287	No hits found		No hits found		N/A		0	0	0	0	1	0	0	1	0	0	0	0	0	1	0	0	1	1
Bradi1g00291	No hits found		No hits found		N/A		0	2	2	0	1	2	0	0	0	0	0	0	0	0	0	0	0	0
Bradi1g00300	AT2G26560.1 | phospholipase A 2A		LOC_Os11g39990.1 | patatin, putative, expressed		N/A		0	0	0	0	0	3	1	0	0	0	0	0	1	1	1	3	0	0
Bradi1g00322	No hits found		LOC_Os04g39530.1 | transposon protein, putative, CACTA, En/Spm sub-class, expressed		N/A		0	1	0	0	1	0	1	0	1	0	0	0	0	1	1	9	0	0
Bradi1g00330	No hits found		LOC_Os12g09220.1 | expressed protein		N/A		1	1	0	1	0	0	0	0	1	0	0	0	0	0	1	3	0	0
Bradi1g00332	No hits found		No hits found		N/A		0	0	0	0	0	0	0	0	1	0	0	1	1	0	1	8	0	0
Bradi1g00335	No hits found		LOC_Os08g09890.1 | expressed protein		N/A		0	0	0	0	0	0	0	0	0	0	0	0	0	0	1	2	0	0
Bradi1g00341	No hits found		No hits found		N/A		0	3	0	0	1	2	1	0	0	0	0	0	0	0	1	7	0	0
Bradi1g00345	No hits found		No hits found		N/A		0	0	0	0	1	0	1	0	0	0	0	0	1	3	1	2	1	0
Bradi1g00350	AT4G35800.1 | RNA polymerase II large subunit		LOC_Os05g05860.1 | retrotransposon protein, putative, unclassified, expressed		N/A		0	0	0	0	0	0	0	0	1	0	0	0	0	1	0	0	1	0
Bradi1g00360	AT4G35800.1 | RNA polymerase II large subunit		LOC_Os05g05860.1 | retrotransposon protein, putative, unclassified, expressed		N/A		0	0	0	1	0	0	0	0	0	0	0	0	0	0	0	0	0	0
Bradi1g00361	No hits found		No hits found		N/A		0	0	0	1	0	0	0	0	0	0	0	0	3	0	0	0	0	0
Bradi1g00362	No hits found		No hits found		N/A		0	0	0	0	0	0	0	0	1	0	0	0	1	1	1	2	0	0
Bradi1g00364	No hits found		No hits found		N/A		0	0	0	0	0	0	0	0	1	0	0	0	0	1	1	3	0	0
Bradi1g00365	No hits found		No hits found		N/A		0	0	0	1	0	0	0	0	0	0	0	0	0	0	1	1	0	0
Bradi1g00366	No hits found		No hits found		N/A		0	0	0	1	0	0	0	0	0	0	0	0	0	0	1	1	1	0
Bradi1g00368	AT3G47680.1 | DNA binding		LOC_Os10g27370.1 | transposon protein, putative, Pong sub-class, expressed		N/A		0	0	0	0	0	2	0	0	0	0	0	0	0	0	1	2	1	0
Bradi1g00370	No hits found		LOC_Os11g09940.1 | expressed protein		N/A		0	1	1	1	0	0	0	0	1	0	0	0	0	1	1	6	1	0
Bradi1g00381	AT3G02010.1 | Pentatricopeptide repeat (PPR) superfamily protein		LOC_Os01g01115.1 | pentatricopeptide, putative, expressed		N/A		0	0	0	0	0	0	0	0	0	0	0	0	0	0	1	1	0	0
Bradi1g00385	No hits found		No hits found		N/A		1	1	0	0	0	0	0	0	1	0	0	0	0	0	1	2	0	0
Bradi1g00390	AT2G40730.1 | Protein kinase family protein with ARM repeat domain		LOC_Os01g60440.1 | HEAT repeat family protein, putative, expressed		N/A		0	0	0	0	0	0	0	0	1	0	0	0	0	1	0	0	1	0
Bradi1g00400	AT1G10280.1 | Core-2/I-branching beta-1,6-N-acetylglucosaminyltransferase family protein		LOC_Os04g20420.1 | DNA binding protein, putative, expressed		N/A		0	0	0	0	0	1	0	0	0	0	0	0	0	0	1	4	0	1
Bradi1g00405	No hits found		LOC_Os01g56900.1 | expressed protein		N/A		0	0	0	0	0	2	0	1	0	0	0	0	1	1	1	1	0	2
Bradi1g00410	AT4G30880.1 | Bifunctional inhibitor/lipid-transfer protein/seed storage 2S albumin superfamily protein		LOC_Os03g25350.1 | LTPL36 - Protease inhibitor/seed storage/LTP family protein precursor, expressed		N/A		0	0	0	0	0	0	0	0	1	0	0	0	0	1	1	1	2	0
Bradi1g00412	No hits found		No hits found		N/A		0	0	0	1	0	0	0	0	0	0	0	0	1	0	0	0	0	0
Bradi1g00413	No hits found		LOC_Os04g50188.1 | retrotransposon protein, putative, unclassified, expressed		N/A		0	1	0	1	0	0	0	0	1	0	0	0	0	0	1	4	0	0
Bradi1g00415	No hits found		No hits found		N/A		0	0	0	0	0	0	0	0	0	0	0	0	0	0	0	0	0	0
Bradi1g00417	No hits found		LOC_Os07g49050.1 | expressed protein		N/A		0	0	0	0	0	0	0	0	0	0	0	0	0	0	0	0	0	0
Bradi1g00427	AT1G03190.2 | RAD3-like DNA-binding helicase protein		LOC_Os05g05260.1 | helicase, putative, expressed		N/A		3	0	0	0	0	0	0	0	0	0	0	0	0	0	1	4	0	0
Bradi1g00438	No hits found		LOC_Os12g14350.1 | transposon protein, putative, CACTA, En/Spm sub-class		N/A		0	0	0	0	0	0	0	1	0	0	0	0	2	0	0	0	0	0
Bradi1g00450	AT4G27100.1 | Ypt/Rab-GAP domain of gyp1p superfamily protein,AT5G54780.1 | Ypt/Rab-GAP domain of gyp1p superfamily protein		LOC_Os11g37690.1 | TBC domain containing protein, expressed		N/A		0	0	0	0	0	0	1	0	0	1	0	0	0	2	0	0	0	0
Bradi1g00455	No hits found		No hits found		N/A		0	0	0	1	0	0	0	0	0	0	0	0	1	1	0	0	0	0
Bradi1g00460	AT1G66950.1 | pleiotropic drug resistance 11		LOC_Os11g37700.1 | pleiotropic drug resistance protein, putative, expressed		N/A		0	0	0	1	0	1	0	0	0	0	0	0	0	4	1	3	1	3
Bradi1g00470	AT5G41210.1 | glutathione S-transferase THETA 1		LOC_Os11g37730.1 | glutathione S-transferase, N-terminal domain containing protein, expressed		N/A		0	1	0	0	0	0	0	0	1	0	0	0	0	0	1	1	0	0
Bradi1g00480	AT5G23890.1 |		LOC_Os03g64400.1 | oxidoreductase/ transition metal ion binding protein, putative, expressed		N/A		0	1	0	0	0	0	0	0	2	0	0	0	0	2	1	1	1	0
Bradi1g00482	AT5G17910.1 |		LOC_Os07g28920.1 | expressed protein		N/A		0	0	0	0	0	0	0	0	0	0	0	0	0	0	0	0	0	0
Bradi1g00485	AT5G41470.1 | Nuclear transport factor 2 (NTF2) family protein		LOC_Os03g64380.1 | expressed protein		N/A		0	0	0	1	0	0	1	0	2	0	0	0	2	0	1	2	0	0
Bradi1g00491	AT5G52850.1 | Pentatricopeptide repeat (PPR) superfamily protein		LOC_Os03g64370.1 | pentatricopeptide, putative, expressed		N/A		0	1	0	0	0	2	0	0	2	1	0	0	0	0	1	3	0	0
Bradi1g00497	AT4G00755.1 | F-box family protein		LOC_Os03g64360.2 | OsFBX113 - F-box domain containing protein, expressed		N/A		0	1	1	0	0	0	0	0	0	0	0	0	0	0	1	3	0	0
Bradi1g00510	AT5G51410.3 | LUC7 N_terminus domain-containing protein,AT5G51410.2 | LUC7 N_terminus domain-containing protein,AT5G51410.1 | LUC7 N_terminus domain-containing protein		LOC_Os07g27300.1 | RNA-binding protein Luc7-like, putative, expressed,LOC_Os07g27300.2 | RNA-binding protein Luc7-like, putative, expressed		N/A		0	1	0	0	0	0	0	0	0	0	0	0	0	0	1	2	1	0
Bradi1g00517	AT2G44710.1 | RNA-binding (RRM/RBD/RNP motifs) family protein		LOC_Os04g45930.1 | RNA recognition motif containing protein, expressed,LOC_Os04g45930.2 | RNA recognition motif containing protein, expressed,LOC_Os04g45930.3 | RNA recognition motif containing protein, expressed		N/A		0	1	0	0	0	1	0	0	0	0	0	0	0	0	0	0	0	0
Bradi1g00530	AT1G17850.2 | Rhodanese/Cell cycle control phosphatase superfamily protein		LOC_Os03g64350.1 | rhodanese-like domain containing protein, putative, expressed		N/A		1	2	1	0	0	1	1	0	1	0	0	0	1	1	0	0	0	0
Bradi1g00535	No hits found		No hits found		N/A		0	0	0	2	0	0	0	1	0	0	0	1	2	0	1	3	0	1
Bradi1g00540	AT5G24580.1 | Heavy metal transport/detoxification superfamily protein		LOC_Os03g64340.1 | heavy metal-associated domain containing protein, expressed		N/A		0	2	2	0	0	1	0	0	0	0	0	0	0	1	1	3	0	1
Bradi1g00552	AT3G54820.1 | plasma membrane intrinsic protein 2;5		LOC_Os02g41860.2 | aquaporin protein, putative, expressed		N/A		0	1	0	1	0	1	0	0	1	0	0	0	0	1	1	2	0	3
Bradi1g00560	AT5G43310.2 | COP1-interacting protein-related		LOC_Os03g64320.1 | expressed protein		N/A		0	1	0	1	0	0	0	0	0	0	0	0	3	1	0	0	0	1
Bradi1g00563	No hits found		LOC_Os03g64310.1 | expressed protein		N/A		0	0	0	1	0	0	0	0	0	0	0	0	3	0	0	0	0	0
Bradi1g00567	AT2G32700.6 | LEUNIG_homolog		LOC_Os03g64300.1 | THION30 - Plant thionin family protein precursor, expressed		N/A		0	0	0	0	0	0	0	0	0	0	0	0	0	0	0	0	0	0
Bradi1g00580	AT1G79570.1 | Protein kinase superfamily protein with octicosapeptide/Phox/Bem1p domain		LOC_Os07g25680.1 | protein kinase domain containing protein, expressed		N/A		0	1	0	0	0	0	0	0	0	1	0	0	1	0	0	0	0	0
Bradi1g00587	AT4G28720.1 | Flavin-binding monooxygenase family protein		LOC_Os07g25540.1 | flavin monooxygenase, putative, expressed		N/A		0	1	0	1	1	2	0	1	0	0	0	1	1	0	0	0	0	0
Bradi1g00600	AT1G04560.1 | AWPM-19-like family protein		LOC_Os07g24000.1 | AWPM-19-like membrane family protein, putative, expressed		N/A		0	0	0	0	2	1	3	0	1	0	0	0	1	0	0	0	0	0
Bradi1g00607	AT1G04160.1 | myosin XI B		LOC_Os03g64290.1 | myosin, putative, expressed		N/A		1	1	0	2	0	0	0	0	0	0	0	0	1	1	0	0	0	0
Bradi1g00620	AT1G63800.1 | ubiquitin-conjugating enzyme 5		LOC_Os10g31000.1 | ubiquitin-conjugating enzyme, putative, expressed		N/A		0	0	0	0	0	0	0	1	0	0	0	0	0	1	0	0	0	0
Bradi1g00625	No hits found		No hits found		N/A		0	1	1	1	1	0	0	0	0	0	0	0	0	0	1	6	0	0
Bradi1g00630	No hits found		No hits found		N/A		0	2	0	1	1	0	1	0	1	0	0	0	0	0	1	3	0	0
Bradi1g00642	No hits found		No hits found		N/A		0	0	0	0	0	1	0	1	0	0	0	0	0	1	1	2	1	0
Bradi1g00654	AT5G07050.1 | nodulin MtN21 /EamA-like transporter family protein		LOC_Os08g31130.1 | integral membrane protein DUF6 containing protein, expressed		N/A		0	1	0	1	1	1	0	1	0	0	0	0	1	0	0	0	1	1
Bradi1g00666	AT3G23240.1 | ethylene response factor 1		LOC_Os03g64260.1 | AP2 domain containing protein, expressed		ERF		0	0	0	0	2	0	1	0	2	0	0	0	0	1	1	3	0	0
Bradi1g00672	No hits found		No hits found		N/A		0	0	0	1	1	0	1	0	0	0	0	0	0	0	0	0	2	1
Bradi1g00678	AT2G20410.1 | RNA-binding ASCH domain protein		LOC_Os03g64250.2 | expressed protein		N/A		1	0	0	0	0	0	0	0	0	0	0	0	0	0	0	0	0	0
Bradi1g00690	AT2G29400.1 | type one protein phosphatase 1		LOC_Os03g16110.3 | Ser/Thr protein phosphatase family protein, putative, expressed		N/A		0	0	0	1	0	0	0	2	2	0	0	0	0	1	1	1	0	0
Bradi1g00700	AT3G54700.1 | phosphate transporter 1;7		LOC_Os04g10750.3 | inorganic phosphate transporter, putative, expressed,LOC_Os04g10750.4 | inorganic phosphate transporter, putative, expressed,LOC_Os04g10750.2 | inorganic phosphate transporter, putative, expressed,LOC_Os04g10750.1 | inorganic phosphate transporter, putative, expressed		N/A		0	1	1	1	0	0	0	0	2	0	0	0	2	3	1	2	0	0
Bradi1g00710	AT5G60720.1 | Protein of unknown function, DUF547		LOC_Os03g64230.1 | expressed protein		N/A		0	0	0	0	0	1	0	1	2	0	0	0	2	0	1	4	0	1
Bradi1g00720	AT5G04250.1 | Cysteine proteinases superfamily protein		LOC_Os03g64219.1 | OTU-like cysteine protease family protein, putative, expressed		N/A		0	0	0	0	1	2	1	0	0	0	0	0	2	1	0	0	1	0
Bradi1g00730	AT2G28000.1 | chaperonin-60alpha		LOC_Os03g64210.1 | T-complex protein, putative, expressed		N/A		0	0	0	1	0	0	0	1	0	0	0	0	0	0	0	0	0	0
Bradi1g00740	AT5G60335.1 | Thioesterase superfamily protein		LOC_Os05g09370.3 | kinase, pfkB family, putative, expressed		N/A		0	0	0	1	0	0	0	0	0	0	0	0	0	0	0	0	0	0
Bradi1g00750	AT2G36990.1 | RNApolymerase sigma-subunit F		LOC_Os08g14450.1 | RNA polymerase sigma factor, putative, expressed		N/A		1	1	0	0	0	0	0	0	2	0	0	0	0	0	1	8	0	0
Bradi1g00760	AT2G28070.1 | ABC-2 type transporter family protein		LOC_Os03g64200.1 | ABC-2 type transporter, putative, expressed		N/A		0	0	0	0	0	0	0	0	0	0	0	0	0	1	0	0	0	0
Bradi1g00770	AT5G03380.1 | Heavy metal transport/detoxification superfamily protein		LOC_Os02g57360.1 | heavy metal-associated domain containing protein, expressed		N/A		0	1	0	1	0	0	0	0	1	0	0	0	0	0	1	1	0	0
Bradi1g00780	AT4G22790.1 | MATE efflux family protein		LOC_Os03g64150.1 | MATE efflux family protein, putative, expressed		N/A		0	0	0	0	0	0	0	1	0	0	0	0	0	0	0	0	0	1
Bradi1g00785	No hits found		LOC_Os05g03490.1 | expressed protein		N/A		1	1	0	0	0	0	0	0	1	0	0	0	0	0	1	4	0	0
Bradi1g00790	AT1G20120.1 | GDSL-like Lipase/Acylhydrolase superfamily protein		LOC_Os03g64170.1 | GDSL-like lipase/acylhydrolase, putative, expressed		N/A		0	0	0	1	0	0	1	0	3	0	0	1	1	0	1	1	0	0
Bradi1g00800	No hits found		LOC_Os05g03490.1 | expressed protein		N/A		1	0	0	2	0	0	0	1	2	0	0	0	0	1	1	3	1	0
Bradi1g00807	AT1G75900.1 | GDSL-like Lipase/Acylhydrolase superfamily protein		LOC_Os03g64170.1 | GDSL-like lipase/acylhydrolase, putative, expressed		N/A		0	0	0	1	0	0	0	0	2	0	0	0	1	0	1	2	0	0
Bradi1g00820	AT5G66100.1 | winged-helix DNA-binding transcription factor family protein		LOC_Os03g64190.1 | la domain containing protein, putative, expressed		N/A		0	3	2	0	2	1	1	0	0	0	0	0	2	0	1	4	0	2
Bradi1g00830	AT3G60810.1 |		LOC_Os03g64140.1 | expressed protein		N/A		0	0	0	1	1	0	0	0	1	0	0	0	2	0	1	4	0	1
Bradi1g00840	AT5G51670.1 | Protein of unknown function (DUF668)		LOC_Os03g64130.1 | avr9/Cf-9 rapidly elicited protein, putative, expressed		N/A		0	0	0	0	0	0	0	0	0	0	0	0	0	1	0	0	1	0
Bradi1g00847	AT4G00090.1 | Transducin/WD40 repeat-like superfamily protein		LOC_Os03g64110.1 | WD domain, G-beta repeat domain containing protein, expressed		N/A		0	0	0	0	0	1	0	0	0	1	0	0	0	1	1	2	1	0
Bradi1g00860	AT1G50510.1 | indigoidine synthase A family protein		LOC_Os08g39420.2 | uncharacterized protein yeiN, putative, expressed		N/A		0	2	0	0	0	0	0	0	1	0	0	0	0	1	1	12	0	0
Bradi1g00867	AT4G36130.1 | Ribosomal protein L2 family		LOC_Os12g38000.1 | 60S ribosomal protein L8, putative, expressed		N/A		0	0	0	0	0	0	0	0	1	0	0	0	0	0	1	2	0	0
Bradi1g00880	No hits found		LOC_Os03g64100.1 | expressed protein		N/A		0	0	0	0	0	0	0	0	0	0	0	0	0	0	1	3	0	1
Bradi1g00887	AT5G17020.1 | exportin 1A		No hits found		N/A		0	0	0	1	1	0	0	0	1	0	0	0	0	1	0	0	0	0
Bradi1g00900	AT5G06300.1 | Putative lysine decarboxylase family protein		LOC_Os03g64070.1 | uncharacterized protein PA4923, putative, expressed		N/A		0	0	0	0	2	0	2	0	0	0	0	0	2	1	1	1	0	0
Bradi1g00910	AT1G65000.1 |		LOC_Os03g64060.1 | expressed protein		N/A		0	0	0	0	0	1	0	0	1	0	0	0	0	0	0	0	0	1
Bradi1g00920	AT4G34215.1 | Domain of unknown function (DUF303)		LOC_Os03g64050.1 | receptor protein kinase, putative, expressed		N/A		0	0	0	0	0	0	0	0	1	0	0	0	1	0	1	2	1	0
Bradi1g00931	AT4G34215.2 | Domain of unknown function (DUF303)		LOC_Os03g64030.1 | receptor protein kinase, putative, expressed		N/A		0	1	0	0	1	0	1	0	1	0	0	0	0	1	1	1	0	0
Bradi1g00940	AT4G22890.1 | PGR5-LIKE A		LOC_Os03g64020.2 | expressed protein		N/A		0	0	0	0	0	0	0	0	0	0	0	0	0	0	1	2	0	0
Bradi1g00950	AT4G25420.1 | 2-oxoglutarate (2OG) and Fe(II)-dependent oxygenase superfamily protein		LOC_Os03g63970.1 | gibberellin 20 oxidase 1, putative, expressed		N/A		0	0	0	1	0	1	0	0	0	0	0	0	0	0	0	0	0	0
Bradi1g00960	AT3G14460.1 | LRR and NB-ARC domains-containing disease resistance protein		LOC_Os07g33690.1 | NBS-LRR type disease resistance protein Hom-F, putative, expressed		N/A		0	0	0	0	0	0	0	0	0	0	0	0	2	0	1	9	0	0
Bradi1g00970	AT2G02360.1 | phloem protein 2-B10		LOC_Os12g03740.1 | OsFBX438 - F-box domain containing protein, expressed		N/A		0	0	0	0	0	0	0	0	0	0	0	0	0	1	0	0	0	0
Bradi1g00980	AT5G24490.1 | 30S ribosomal protein, putative		LOC_Os03g63950.1 | plastid-specific 30S ribosomal protein 1, chloroplast precursor, putative, expressed		N/A		0	0	0	1	0	0	0	0	0	0	0	0	0	0	0	0	0	0
Bradi1g00990	AT1G09020.1 | homolog of yeast sucrose nonfermenting 4		LOC_Os03g63940.1 | CBS domain containing membrane protein, putative, expressed		N/A		0	0	0	0	1	2	0	0	1	0	0	0	1	1	1	1	0	0
Bradi1g01000	AT3G05020.1 | acyl carrier protein 1		LOC_Os03g63930.1 | acyl carrier protein, putative, expressed		N/A		0	0	0	0	0	0	0	0	1	0	0	0	1	0	0	0	0	0
Bradi1g01007	AT1G48050.1 | Ku80 family protein		LOC_Os03g63920.1 | KAP-2, putative, expressed		N/A		0	0	0	0	0	1	0	0	0	0	0	0	0	0	1	2	0	0
Bradi1g01014	AT1G15370.1 | SNARE-like superfamily protein		LOC_Os03g63910.1 | PPR repeat domain containing protein, putative, expressed		N/A		0	0	0	0	0	1	0	0	0	0	0	0	0	0	1	2	0	0
Bradi1g01021	AT5G46580.1 | pentatricopeptide (PPR) repeat-containing protein		LOC_Os03g63910.1 | PPR repeat domain containing protein, putative, expressed		N/A		0	2	1	2	0	0	0	0	1	0	0	0	0	0	1	1	1	0
Bradi1g01030	AT1G75250.1 | RAD-like 6		LOC_Os03g63890.1 | MYB family transcription factor, putative, expressed		MYB_related		0	0	0	0	1	0	0	0	0	0	0	0	0	1	1	1	0	0
Bradi1g01040	AT2G25140.1 | casein lytic proteinase B4		LOC_Os02g33420.1 | ATPase, AAA family protein, expressed		N/A		0	0	0	1	0	2	0	2	2	0	0	0	1	0	0	0	1	0
Bradi1g01047	AT5G42960.1 |		LOC_Os03g63860.1 | DANA2, putative, expressed		N/A		0	0	0	0	0	0	0	0	0	0	0	0	0	0	0	0	0	2
Bradi1g01058	AT2G34830.1 | WRKY DNA-binding protein 35		LOC_Os03g63810.1 | WRKY80, expressed		WRKY		0	0	0	0	0	0	0	0	0	0	0	0	0	0	0	0	0	0
Bradi1g01070	AT2G44510.1 | CDK inhibitor P21 binding protein		LOC_Os03g63690.1 | BCCIP, putative, expressed		N/A		0	1	1	0	0	2	0	1	0	0	0	0	3	0	0	0	0	1
Bradi1g01075	No hits found		No hits found		N/A		0	0	0	1	0	0	0	0	0	0	0	0	1	0	0	0	0	0
Bradi1g01080	AT3G02910.1 | AIG2-like (avirulence induced gene) family protein		LOC_Os03g63700.1 | AIG2-like family domain containing protein, expressed		N/A		0	0	0	0	1	0	0	0	2	0	0	0	0	0	0	0	1	0
Bradi1g01090	AT5G46750.1 | ARF-GAP domain 9,AT4G17890.1 | ARF-GAP domain 8		LOC_Os03g63710.1 | GTPase-activating protein, putative, expressed,LOC_Os03g63710.2 | GTPase-activating protein, putative, expressed		N/A		0	1	0	1	0	0	1	0	1	0	0	0	1	2	0	0	0	0
Bradi1g01100	AT3G46210.4 | Ribosomal protein S5 domain 2-like superfamily protein		LOC_Os03g63720.1 | exosome complex exonuclease, putative, expressed		N/A		0	1	0	0	0	0	0	0	2	0	0	0	1	0	1	7	0	0
Bradi1g01110	AT5G46840.1 | RNA-binding (RRM/RBD/RNP motifs) family protein		LOC_Os03g63730.1 | RNA recognition motif containing protein, putative, expressed		N/A		0	1	0	0	1	0	0	2	0	0	0	0	2	0	1	4	0	0
Bradi1g01120	AT1G24450.1 | Ribonuclease III family protein		LOC_Os03g63740.1 | NFD2, putative, expressed		N/A		0	0	0	0	1	1	2	0	1	0	0	0	2	0	0	0	0	0
Bradi1g01130	AT1G32330.1 | heat shock transcription factor A1D		LOC_Os03g63750.1 | HSF-type DNA-binding domain containing protein, expressed		HSF		0	0	0	2	2	0	1	0	1	0	0	0	1	0	1	1	0	0
Bradi1g01140	AT1G61010.2 | cleavage and polyadenylation specificity factor 73-I,AT1G61010.3 | cleavage and polyadenylation specificity factor 73-I		LOC_Os03g63590.1 | metallo-beta-lactamase, putative, expressed		N/A		0	0	0	1	0	0	0	0	0	1	0	0	0	1	0	0	0	0
Bradi1g01150	AT1G32170.1 | xyloglucan endotransglucosylase/hydrolase 30		LOC_Os03g63760.1 | glycosyl hydrolases family 16, putative, expressed		N/A		0	1	1	1	0	1	0	0	0	0	0	0	0	0	0	0	1	1
Bradi1g01160	No hits found		LOC_Os05g03490.1 | expressed protein		N/A		1	1	1	1	0	0	1	1	1	0	0	1	2	0	0	0	0	1
Bradi1g01170	AT1G32230.2 | WWE protein-protein interaction domain protein family,AT1G32230.1 | WWE protein-protein interaction domain protein family,AT1G32230.3 | WWE protein-protein interaction domain protein family		LOC_Os03g63770.1 | RCD1, putative, expressed,LOC_Os03g63770.4 | RCD1, putative, expressed,LOC_Os03g63770.5 | RCD1, putative, expressed,LOC_Os03g63770.3 | RCD1, putative, expressed		N/A		0	1	1	0	0	0	0	1	0	0	0	0	1	0	1	1	0	0
Bradi1g01172	No hits found		No hits found		N/A		0	0	0	0	0	1	0	0	0	0	0	0	1	3	1	1	0	0
Bradi1g01174	AT4G22910.1 | FIZZY-related 2		LOC_Os03g03150.2 | WD repeat-containing protein, putative, expressed		N/A		0	1	0	0	1	0	0	0	0	0	0	0	0	0	1	16	1	0
Bradi1g01176	No hits found		LOC_Os05g46800.1 | expressed protein		N/A		0	0	0	0	1	2	0	0	1	1	0	0	1	0	1	2	0	0
Bradi1g01178	No hits found		LOC_Os03g06750.1 | expressed protein		N/A		0	0	0	0	0	1	0	0	1	0	0	0	0	1	1	1	0	0
Bradi1g01180	AT1G74310.1 | heat shock protein 101		LOC_Os02g33420.1 | ATPase, AAA family protein, expressed		N/A		0	1	0	0	0	0	0	1	2	0	0	0	0	1	1	3	0	0
Bradi1g01190	AT3G03530.1 | non-specific phospholipase C4		LOC_Os03g63580.1 | phosphoesterase family protein, putative, expressed		N/A		0	1	1	0	1	0	0	1	0	0	0	0	0	0	0	0	0	0
Bradi1g01200	AT1G61010.3 | cleavage and polyadenylation specificity factor 73-I		LOC_Os03g63590.1 | metallo-beta-lactamase, putative, expressed		N/A		0	0	0	0	0	0	0	0	0	0	0	1	1	1	1	6	0	2
Bradi1g01210	AT3G14000.1 | DZC (Disease resistance/zinc finger/chromosome condensation-like region) domain containing protein,AT1G31880.1 | DZC (Disease resistance/zinc finger/chromosome condensation-like region) domain containing protein		LOC_Os03g63650.1 | brevis radix, putative, expressed		N/A		0	0	0	4	0	2	0	0	0	0	0	0	0	0	1	2	0	3
Bradi1g01220	AT3G45900.1 | Ribonuclease P protein subunit P38-related		LOC_Os03g63660.1 | expressed protein		N/A		0	1	1	1	0	0	0	1	3	0	0	0	1	1	1	1	0	0
Bradi1g01227	AT2G35790.1 |		LOC_Os03g63680.1 | expressed protein		N/A		0	0	0	1	0	0	0	1	1	0	0	0	1	0	1	2	1	0
Bradi1g01240	AT1G74310.1 | heat shock protein 101		LOC_Os02g33420.1 | ATPase, AAA family protein, expressed		N/A		0	0	0	1	0	0	0	1	0	0	0	0	0	0	1	1	0	0
Bradi1g01250	AT3G46530.1 | NB-ARC domain-containing disease resistance protein		LOC_Os11g46210.1 | NB-ARC domain containing protein, expressed		N/A		0	0	0	0	0	1	0	0	1	0	0	0	0	0	0	0	0	0
Bradi1g01257	AT3G07040.1 | NB-ARC domain-containing disease resistance protein		LOC_Os10g04110.1 | MLA6 protein, putative, expressed		N/A		0	0	0	0	0	0	1	0	2	0	0	0	0	0	1	1	1	0
Bradi1g01270	AT5G65660.1 | hydroxyproline-rich glycoprotein family protein		No hits found		N/A		0	1	0	1	1	0	0	1	0	1	0	0	2	0	0	0	0	1
Bradi1g01280	AT1G03510.1 | Tetratricopeptide repeat (TPR)-like superfamily protein		LOC_Os03g63510.1 | pentatricopeptide, putative, expressed		N/A		0	0	0	0	0	1	0	0	0	0	0	0	1	1	1	2	0	0
Bradi1g01290	AT4G04860.1 | DERLIN-2.2		LOC_Os03g63520.1 | Der1-like family domain containing protein, expressed		N/A		0	1	0	1	0	1	1	1	1	0	0	0	0	1	0	0	1	0
Bradi1g01300	AT1G07980.1 | nuclear factor Y, subunit C10		LOC_Os03g63530.1 | histone-like transcription factor and archaeal histone, putative, expressed		NF-YC		0	0	0	1	0	0	0	2	1	1	0	0	1	0	1	1	0	0
Bradi1g01305	No hits found		No hits found		N/A		0	1	0	0	0	0	0	0	0	0	0	0	1	0	0	0	0	0
Bradi1g01310	AT3G45230.1 | hydroxyproline-rich glycoprotein family protein		LOC_Os03g63540.1 | lysine-rich arabinogalactan protein 19 precursor, putative, expressed		N/A		0	2	0	1	0	1	0	0	0	0	0	0	0	0	0	0	1	0
Bradi1g01320	AT1G73940.1 |		LOC_Os03g63550.1 | expressed protein		N/A		2	0	0	1	0	0	0	0	0	0	0	0	1	0	1	1	0	1
Bradi1g01330	AT3G56830.1 | Protein of unknown function (DUF565)		LOC_Os03g63554.1 | DUF565 domain containing protein, putative, expressed		N/A		0	1	0	1	0	0	0	0	1	0	0	0	1	0	1	1	1	0
Bradi1g01332	AT4G29090.1 | Ribonuclease H-like superfamily protein		LOC_Os02g54480.1 | RNA-directed DNA polymerase, putative, expressed		N/A		0	0	0	1	0	0	0	1	0	0	0	0	1	0	0	0	0	0
Bradi1g01334	No hits found		No hits found		N/A		0	1	0	0	0	0	0	1	1	0	0	0	1	0	1	2	0	0
Bradi1g01336	No hits found		No hits found		N/A		0	0	0	0	0	0	1	0	2	0	0	0	0	1	1	5	0	0
Bradi1g01338	No hits found		LOC_Os01g14320.1 | expressed protein		N/A		0	1	1	0	0	0	0	0	0	0	0	0	0	4	1	4	2	0
Bradi1g01342	No hits found		No hits found		N/A		0	0	0	1	0	0	0	0	0	0	0	0	1	0	1	1	0	1
Bradi1g01344	No hits found		No hits found		N/A		0	1	0	0	0	0	1	0	0	0	0	0	0	0	0	0	0	0
Bradi1g01350	AT5G16820.1 | heat shock factor 3		LOC_Os03g63750.1 | HSF-type DNA-binding domain containing protein, expressed		N/A		0	0	0	0	0	0	0	0	0	0	0	0	1	0	1	1	1	0
Bradi1g01357	AT1G74310.1 | heat shock protein 101		LOC_Os02g33420.1 | ATPase, AAA family protein, expressed		N/A		0	0	0	0	0	0	0	0	1	0	0	0	1	0	1	1	0	0
Bradi1g01363	AT4G25270.1 | Tetratricopeptide repeat (TPR)-like superfamily protein		LOC_Os03g63560.1 | pentatricopeptide, putative, expressed		N/A		0	0	0	0	0	0	0	0	0	0	0	0	0	0	1	2	0	0
Bradi1g01368	AT4G02420.1 | Concanavalin A-like lectin protein kinase family protein		LOC_Os03g15250.1 | lectin-like receptor kinase, putative, expressed		N/A		0	0	0	1	0	0	1	0	1	0	0	0	2	1	1	1	0	0
Bradi1g01374	AT3G46530.1 | NB-ARC domain-containing disease resistance protein		LOC_Os10g04342.1 | stripe rust resistance protein Yr10, putative, expressed		N/A		0	0	0	2	0	0	0	2	0	0	0	0	0	6	0	0	1	1
Bradi1g01380	AT3G07040.1 | NB-ARC domain-containing disease resistance protein		LOC_Os10g04110.1 | MLA6 protein, putative, expressed		N/A		0	0	0	0	0	0	0	0	0	0	0	0	1	1	0	0	1	0
Bradi1g01387	AT3G46530.1 | NB-ARC domain-containing disease resistance protein		LOC_Os10g04110.1 | MLA6 protein, putative, expressed		N/A		0	0	0	1	0	0	0	0	1	0	0	0	1	1	1	2	1	0
Bradi1g01397	AT1G59780.1 | NB-ARC domain-containing disease resistance protein		LOC_Os10g04342.1 | stripe rust resistance protein Yr10, putative, expressed		N/A		0	0	0	2	0	0	0	0	0	0	0	0	0	0	0	0	0	0
Bradi1g01407	AT3G07040.1 | NB-ARC domain-containing disease resistance protein		LOC_Os10g04110.1 | MLA6 protein, putative, expressed		N/A		0	0	0	1	0	0	0	0	1	0	0	0	0	1	0	0	1	0
Bradi1g01420	AT2G25530.1 | AFG1-like ATPase family protein		LOC_Os03g63500.1 | ATPase, AFG1 family domain containing protein, expressed		N/A		0	0	0	0	0	0	0	0	0	0	0	0	0	1	1	3	0	0
Bradi1g01432	AT3G47570.1 | Leucine-rich repeat protein kinase family protein		LOC_Os11g10310.1 | receptor-like protein kinase 2 precursor, putative, expressed		N/A		0	2	0	0	0	0	0	1	1	0	0	0	1	2	1	1	1	0
Bradi1g01442	AT3G47570.1 | Leucine-rich repeat protein kinase family protein		LOC_Os11g10310.1 | receptor-like protein kinase 2 precursor, putative, expressed		N/A		0	0	0	1	0	0	0	0	2	0	0	0	0	1	1	3	0	0
Bradi1g01450	AT2G03200.1 | Eukaryotic aspartyl protease family protein		LOC_Os08g36530.1 | aspartic proteinase nepenthesin precursor, putative, expressed		N/A		0	0	0	0	0	0	0	1	0	0	0	0	1	0	0	0	0	0
Bradi1g01455	AT5G10770.1 | Eukaryotic aspartyl protease family protein		LOC_Os08g36530.1 | aspartic proteinase nepenthesin precursor, putative, expressed		N/A		0	1	0	0	0	0	0	0	0	0	0	0	1	0	0	0	0	0
Bradi1g01460	AT5G48840.1 | homolog of bacterial PANC		LOC_Os03g63490.1 | pantoate--beta-alanine ligase, putative, expressed		N/A		0	1	0	1	1	0	0	0	2	0	0	0	0	0	1	5	0	0
Bradi1g01470	AT2G35030.1 | Pentatricopeptide repeat (PPR) superfamily protein		LOC_Os05g02210.1 | pentatricopeptide, putative, expressed		N/A		0	0	0	0	0	0	1	1	0	0	0	0	0	0	1	1	0	0
Bradi1g01480	AT4G35450.2 | ankyrin repeat-containing protein 2		LOC_Os03g63480.1 | ankyrin repeat domain containing protein, expressed		N/A		0	0	0	0	0	0	1	0	2	0	0	0	0	2	0	0	0	0
Bradi1g01487	AT5G50970.1 | transducin family protein / WD-40 repeat family protein		LOC_Os03g63470.1 | retrotransposon protein, putative, unclassified, expressed		N/A		0	0	0	0	0	1	0	0	0	0	0	0	0	0	0	0	0	0
Bradi1g01500	AT5G47870.1 |		LOC_Os03g63450.2 | snRK1-interacting protein 1, putative, expressed		N/A		0	0	0	0	0	0	0	0	0	0	0	0	0	0	0	0	0	0
Bradi1g01507	AT5G48030.1 | gametophytic factor 2		LOC_Os06g02620.1 | chaperone protein dnaJ, putative, expressed		N/A		0	0	0	0	0	0	0	0	0	0	0	0	0	2	0	0	0	0
Bradi1g01520	AT4G00650.1 | FRIGIDA-like protein		LOC_Os03g63440.1 | frigida, putative, expressed		N/A		0	0	0	1	2	0	1	2	1	0	0	0	0	0	1	1	0	0
Bradi1g01530	AT1G09760.1 | U2 small nuclear ribonucleoprotein A		LOC_Os02g13990.1 | U2 small nuclear ribonucleoprotein A, putative, expressed		N/A		0	0	0	0	0	0	0	0	0	0	1	0	0	0	0	0	0	0
Bradi1g01541	AT1G61000.1 |		LOC_Os08g06600.1 | nuf2 family protein, expressed		N/A		0	0	0	0	0	0	0	0	1	1	0	0	0	1	1	1	0	0
Bradi1g01551	AT3G07040.1 | NB-ARC domain-containing disease resistance protein		LOC_Os08g14850.1 | resistance protein, putative, expressed		N/A		0	0	0	2	0	2	0	1	0	0	0	0	0	1	1	1	1	0
Bradi1g01560	AT5G09900.2 | 26S proteasome regulatory subunit, putative (RPN5)		LOC_Os03g63430.1 | proteasome subunit, putative, expressed		N/A		0	1	1	0	0	0	0	0	2	0	0	0	1	0	0	0	1	0
Bradi1g01570	AT3G54900.1 | CAX interacting protein 1		LOC_Os03g63420.1 | OsGrx_S14 - glutaredoxin subgroup II, expressed		N/A		0	0	0	0	2	0	0	0	0	1	0	0	1	0	1	6	0	0
Bradi1g01580	AT4G02930.1 | GTP binding Elongation factor Tu family protein		LOC_Os03g63410.1 | elongation factor Tu, putative, expressed		N/A		1	1	0	0	0	0	0	0	1	0	0	0	0	0	1	9	0	0
Bradi1g01590	No hits found		No hits found		N/A		0	0	0	0	1	1	1	0	0	0	0	0	0	1	1	4	0	0
Bradi1g01593	No hits found		LOC_Os03g42450.1 | expressed protein		N/A		0	0	0	0	0	0	0	0	2	0	0	0	0	0	1	1	0	0
Bradi1g01594	AT3G49340.1 | Cysteine proteinases superfamily protein		LOC_Os01g73980.1 | xylem cysteine proteinase 2 precursor, putative, expressed		N/A		0	1	1	0	0	2	0	1	1	0	0	0	2	0	0	0	0	0
Bradi1g01596	No hits found		No hits found		N/A		0	0	0	0	0	0	0	0	1	0	0	0	1	0	0	0	0	0
Bradi1g01598	AT3G48340.1 | Cysteine proteinases superfamily protein		LOC_Os11g14900.1 | thiol protease SEN102 precursor, putative, expressed		N/A		0	0	0	1	0	0	0	0	1	0	0	0	1	1	1	1	0	0
Bradi1g01600	AT1G17880.1 | basic transcription factor 3		LOC_Os03g63400.1 | transcription factor BTF3, putative, expressed		N/A		0	2	1	1	1	0	0	0	1	0	0	0	1	0	0	0	0	0
Bradi1g01610	AT2G02850.1 | plantacyanin		LOC_Os03g50160.1 | plastocyanin-like domain containing protein, putative, expressed		N/A		0	0	0	1	0	0	0	0	0	0	0	0	0	0	1	5	1	1
Bradi1g01620	AT4G14100.1 | transferases, transferring glycosyl groups		LOC_Os03g63380.1 | expressed protein		N/A		0	0	0	0	0	1	0	0	1	0	0	0	2	0	1	5	0	1
Bradi1g01630	AT1G01630.1 | Sec14p-like phosphatidylinositol transfer family protein		LOC_Os03g63370.1 | CRAL/TRIO domain containing protein, expressed		N/A		0	1	0	0	0	1	1	0	0	0	0	0	2	0	0	0	0	0
Bradi1g01640	AT5G14060.2 | Aspartate kinase family protein,AT5G14060.1 | Aspartate kinase family protein		LOC_Os03g63330.1 | aspartokinase, chloroplast precursor, putative, expressed		NAC		0	0	0	1	0	1	1	0	0	0	0	0	0	0	0	0	0	1
Bradi1g01645	No hits found		No hits found		N/A		0	0	0	0	0	1	0	1	0	0	0	0	1	0	0	0	0	0
Bradi1g01650	AT3G15510.1 | NAC domain containing protein 2		LOC_Os01g47670.1 | expressed protein		NAC		0	0	0	0	0	1	0	0	0	0	0	0	0	0	0	0	0	0
Bradi1g01656	AT5G13280.1 | aspartate kinase 1		LOC_Os03g63330.1 | aspartokinase, chloroplast precursor, putative, expressed		N/A		0	0	0	0	1	0	1	0	0	0	0	0	0	0	1	1	1	0
Bradi1g01660	AT1G28140.1 |		LOC_Os03g63360.1 | glutathione S-transferase, putative, expressed		N/A		0	1	0	0	2	1	3	0	1	0	0	0	0	0	1	1	0	0
Bradi1g01670	AT1G61000.1 |		LOC_Os03g38010.1 | nuf2 family protein, expressed		N/A		1	0	0	0	2	1	1	0	0	0	0	0	0	1	1	2	0	0
Bradi1g01680	No hits found		LOC_Os07g13030.1 | expressed protein		N/A		0	0	0	0	2	2	1	1	0	0	0	0	0	0	0	0	0	1
Bradi1g01683	AT2G02450.2 | NAC domain containing protein 35		LOC_Os03g61650.1 | expressed protein		NAC		0	0	0	0	1	4	1	1	0	0	0	0	1	0	1	3	0	1
Bradi1g01686	No hits found		No hits found		N/A		0	3	1	0	0	0	0	0	0	0	0	0	1	0	1	1	0	0
Bradi1g01691	No hits found		No hits found		N/A		0	0	0	1	0	1	0	0	0	0	0	0	0	0	0	0	0	0
Bradi1g01692	ATCG00680.1 | photosystem II reaction center protein B		LOC_Os06g39708.1 | photosystem II P680 chlorophyll A apoprotein, putative, expressed		N/A		0	0	0	2	0	2	0	2	0	0	0	0	1	0	0	0	1	0
Bradi1g01693	No hits found		No hits found		N/A		0	0	0	0	0	0	0	1	0	0	0	0	0	0	0	0	0	1
Bradi1g01695	AT3G07130.1 | purple acid phosphatase 15		LOC_Os03g61650.1 | expressed protein		NAC		0	1	0	0	0	2	0	0	1	0	0	0	1	1	1	3	0	1
Bradi1g01700	AT3G07130.1 | purple acid phosphatase 15		LOC_Os03g63074.2 | Ser/Thr protein phosphatase family protein, expressed,LOC_Os03g63074.1 | Ser/Thr protein phosphatase family protein, expressed		N/A		1	0	0	1	0	4	0	0	1	0	0	0	1	0	1	2	0	0
Bradi1g01710	AT4G14147.1 | protein binding		LOC_Os03g63090.1 | actin-related protein 2/3 complex subunit 4, putative, expressed		N/A		0	0	0	0	0	0	0	0	1	0	0	0	1	0	1	4	0	0
Bradi1g01715	No hits found		No hits found		N/A		0	1	0	0	0	0	0	0	1	1	0	0	1	0	1	2	0	0
Bradi1g01720	AT5G48660.1 | B-cell receptor-associated protein 31-like		LOC_Os03g63110.1 | prefoldin, putative, expressed		N/A		0	0	0	1	0	0	0	2	1	0	0	0	1	0	1	1	0	0
Bradi1g01730	AT3G25070.1 | RPM1 interacting protein 4		LOC_Os03g63140.1 | nitrate-induced NOI protein, expressed,LOC_Os03g63140.2 | nitrate-induced NOI protein, expressed		N/A		0	0	0	0	0	1	0	0	0	0	0	0	0	1	1	1	0	0
Bradi1g01740	AT4G24840.1 |		LOC_Os03g63250.1 | brefeldin A-sensitive Golgi protein-like, putative, expressed		N/A		0	0	0	0	0	1	1	0	1	0	0	0	0	0	1	1	0	1
Bradi1g01750	AT1G14590.1 | Nucleotide-diphospho-sugar transferase family protein		LOC_Os03g63270.1 | regulatory protein, putative, expressed		N/A		0	2	0	0	0	1	0	0	2	0	0	0	2	1	1	2	0	0
Bradi1g01760	AT4G19970.1 |		LOC_Os03g63280.1 | regulatory protein, putative, expressed		N/A		0	0	0	0	1	0	2	0	1	0	0	0	1	1	1	4	1	0
Bradi1g01770	AT4G39460.2 | S-adenosylmethionine carrier 1		LOC_Os05g29860.2 | mitochondrial carrier protein, putative, expressed		N/A		0	2	0	0	0	0	0	0	0	0	0	0	0	0	1	1	0	0
Bradi1g01780	AT3G01980.1 | NAD(P)-binding Rossmann-fold superfamily protein		LOC_Os03g63290.1 | oxidoreductase, short chain dehydrogenase/reductase family protein, putative, expressed		N/A		0	0	0	1	0	0	0	0	0	0	0	0	1	2	0	0	0	1
Bradi1g01790	AT3G48800.1 | Sterile alpha motif (SAM) domain-containing protein		LOC_Os03g63320.1 | SAM domain containing protein, putative, expressed		N/A		0	3	1	0	2	0	1	1	0	0	1	0	1	0	1	1	0	0
Bradi1g01795	No hits found		No hits found		N/A		0	2	0	0	0	0	0	0	1	0	0	0	0	0	1	2	0	0
Bradi1g01800	AT5G13280.1 | aspartate kinase 1		LOC_Os03g63330.1 | aspartokinase, chloroplast precursor, putative, expressed		N/A		0	0	0	1	0	0	0	0	2	0	0	0	1	0	1	2	0	0
Bradi1g01801	AT1G65910.1 | NAC domain containing protein 28		LOC_Os03g61319.1 | RD26, putative, expressed		NAC		0	0	0	0	0	0	0	0	0	0	0	0	0	0	1	2	0	0
Bradi1g01802	No hits found		No hits found		N/A		0	0	0	0	1	0	0	0	1	0	0	0	2	0	0	0	0	0
Bradi1g01805	AT3G07130.1 | purple acid phosphatase 15		LOC_Os03g63074.2 | Ser/Thr protein phosphatase family protein, expressed		N/A		0	1	1	1	0	2	0	0	0	0	0	0	0	1	1	2	1	0
Bradi1g01807	AT2G02450.1 | NAC domain containing protein 35		LOC_Os03g61650.1 | expressed protein		NAC		0	2	0	0	0	0	0	0	1	0	0	0	0	0	1	3	0	1
Bradi1g01810	No hits found		LOC_Os03g63074.3 | Ser/Thr protein phosphatase family protein, expressed,LOC_Os03g63074.1 | Ser/Thr protein phosphatase family protein, expressed,LOC_Os03g63074.2 | Ser/Thr protein phosphatase family protein, expressed		N/A		0	0	0	0	1	2	1	2	1	0	0	0	0	0	0	0	0	1
Bradi1g01820	AT5G16490.1 | ROP-interactive CRIB motif-containing protein 4		LOC_Os03g63060.1 | P21-Rho-binding domain containing protein, putative, expressed		N/A		0	0	0	1	0	0	0	0	0	0	0	0	1	1	0	0	1	1
Bradi1g01830	AT5G43490.1 |		LOC_Os03g63040.1 | expressed protein		N/A		0	0	0	2	0	0	0	0	1	0	0	0	1	0	0	0	0	1
Bradi1g01835	No hits found		No hits found		N/A		0	0	0	1	0	0	0	0	0	0	0	0	1	0	1	1	0	0
Bradi1g01840	AT4G13020.1 | Protein kinase superfamily protein,AT4G13020.4 | Protein kinase superfamily protein		LOC_Os03g63020.5 | protein kinase domain containing protein, expressed,LOC_Os03g63020.1 | protein kinase domain containing protein, expressed		N/A		0	0	0	0	0	2	0	0	0	0	0	0	2	0	1	4	0	0
Bradi1g01847	AT3G23790.1 | AMP-dependent synthetase and ligase family protein		LOC_Os03g62850.1 | AMP-binding enzyme, putative, expressed		N/A		0	0	0	1	0	1	0	0	0	0	0	0	0	0	0	0	0	1
Bradi1g01860	AT4G17520.1 | Hyaluronan / mRNA binding family		LOC_Os03g62830.1 | nuclear antigen, putative, expressed		N/A		1	1	0	0	2	2	2	1	0	0	0	0	1	0	1	5	0	0
Bradi1g01870	AT2G43120.1 | RmlC-like cupins superfamily protein		LOC_Os03g62790.2 | pirin, putative, expressed,LOC_Os03g62790.1 | pirin, putative, expressed		N/A		0	1	0	0	2	0	0	0	4	0	0	0	1	0	1	1	1	0
Bradi1g01873	No hits found		No hits found		N/A		0	4	1	0	2	2	1	0	0	0	0	0	0	0	1	7	0	0
Bradi1g01876	No hits found		No hits found		N/A		0	0	0	0	1	1	1	0	1	0	0	0	0	1	1	3	0	0
Bradi1g01880	AT3G23700.1 | Nucleic acid-binding proteins superfamily		LOC_Os03g62780.1 | S1 RNA binding domain containing protein, expressed		N/A		0	0	0	1	0	0	0	0	0	0	0	0	0	0	1	1	0	0
Bradi1g01890	No hits found		LOC_Os03g62770.1 | expressed protein		N/A		0	1	0	0	0	1	1	0	1	0	0	0	0	0	1	2	0	0
Bradi1g01900	AT1G24490.1 | OxaA/YidC-like membrane insertion protein,AT2G28800.1 | 63 kDa inner membrane family protein		LOC_Os03g62750.1 | inner membrane protein, putative, expressed		N/A		0	0	0	2	2	0	0	0	0	0	0	0	0	0	1	3	0	0
Bradi1g01910	No hits found		LOC_Os07g18070.1 | expressed protein		N/A		0	0	0	0	0	0	0	0	0	0	0	0	1	0	0	0	1	0
Bradi1g01920	AT3G48460.1 | GDSL-like Lipase/Acylhydrolase superfamily protein		LOC_Os03g62740.1 | GDSL-like lipase/acylhydrolase, putative, expressed		N/A		0	0	0	0	0	0	0	0	0	0	0	0	0	0	0	0	0	0
Bradi1g01930	AT4G15415.1 | Protein phosphatase 2A regulatory B subunit family protein		LOC_Os03g62730.3 | transposon protein, putative, unclassified, expressed		N/A		0	0	0	0	2	0	0	0	1	2	0	0	1	0	0	0	0	0
Bradi1g01936	AT3G59350.3 | Protein kinase superfamily protein,AT3G59350.1 | Protein kinase superfamily protein		LOC_Os03g62700.1 | protein kinase, putative, expressed		N/A		0	0	0	0	1	1	1	0	3	0	0	0	0	0	1	5	0	0
Bradi1g01942	AT2G31870.1 | Poly (ADP-ribose) glycohydrolase (PARG)		LOC_Os03g62680.1 | expressed protein		N/A		0	0	0	0	1	0	0	1	0	0	0	0	0	1	0	0	1	0
Bradi1g01946	AT3G42860.1 | zinc knuckle (CCHC-type) family protein		LOC_Os02g27430.1 | GRF zinc finger family protein		N/A		0	0	0	0	0	1	0	0	0	0	0	0	0	1	1	3	0	0
Bradi1g01948	AT2G31870.1 | Poly (ADP-ribose) glycohydrolase (PARG)		LOC_Os03g62680.1 | expressed protein		N/A		0	0	0	0	0	0	0	0	0	1	0	0	1	0	0	0	0	1
Bradi1g01950	No hits found		No hits found		N/A		0	0	0	0	0	0	0	1	0	0	0	0	3	2	0	0	0	0
Bradi1g01958	No hits found		No hits found		N/A		0	0	0	0	0	1	0	0	1	0	0	0	0	0	1	1	0	0
Bradi1g01965	No hits found		No hits found		N/A		0	0	0	0	0	1	0	0	2	1	0	0	0	3	0	0	0	0
Bradi1g01970	AT2G27610.1 | Tetratricopeptide repeat (TPR)-like superfamily protein		LOC_Os03g62690.2 | pentatricopeptide, putative, expressed		N/A		0	0	0	0	0	0	0	0	2	0	0	0	0	0	1	13	0	0
Bradi1g01980	AT2G31870.2 | Poly (ADP-ribose) glycohydrolase (PARG)		LOC_Os03g62680.1 | expressed protein		N/A		0	0	0	0	0	0	0	0	0	0	0	0	0	0	1	7	0	0
Bradi1g01985	AT5G20480.1 | EF-TU receptor		LOC_Os02g40180.1 | receptor-like protein kinase 5 precursor, putative, expressed,LOC_Os02g40240.1 | receptor kinase, putative, expressed,LOC_Os02g40240.2 | receptor kinase, putative, expressed		N/A		0	1	0	2	0	2	0	0	1	0	0	0	0	1	0	0	0	0
Bradi1g01990	AT1G52520.1 | FAR1-related sequence 6		LOC_Os03g62660.1 | transposon protein, putative, unclassified, expressed		FAR1		0	0	0	1	0	0	0	0	0	0	0	0	2	0	1	1	0	0
Bradi1g02000	AT5G49960.1 |		LOC_Os03g62650.1 | ion channel DMI1-like, chloroplast precursor, putative, expressed		N/A		0	0	0	0	0	0	0	1	1	0	0	0	1	1	1	1	0	1
Bradi1g02010	AT2G44580.1 | zinc ion binding		LOC_Os05g02810.1 | protein binding protein, putative, expressed		N/A		0	0	0	0	0	0	0	0	0	0	0	0	0	0	1	2	1	0
Bradi1g02020	AT5G17440.1 | LUC7 related protein,AT3G03340.1 | LUC7 related protein		LOC_Os03g62640.2 | RNA-binding protein Luc7-like, putative, expressed,LOC_Os03g62640.4 | RNA-binding protein Luc7-like, putative, expressed		N/A		0	0	0	0	0	0	0	0	0	0	0	0	0	0	0	0	1	0
Bradi1g02030	AT1G64510.1 | Translation elongation factor EF1B/ribosomal protein S6 family protein		LOC_Os03g62630.1 | ribosomal protein S6, putative, expressed		N/A		0	0	0	0	1	0	1	1	1	0	0	0	0	1	1	2	0	0
Bradi1g02040	AT1G24380.1 |		LOC_Os02g25850.1 | transposon protein, putative, Pong sub-class, expressed		N/A		0	1	0	0	1	0	1	0	0	0	0	0	0	0	1	6	0	0
Bradi1g02050	AT2G27880.1 | Argonaute family protein,AT1G48410.1 | Stabilizer of iron transporter SufD / Polynucleotidyl transferase,AT1G48410.3 | Stabilizer of iron transporter SufD / Polynucleotidyl transferase		LOC_Os03g58600.1 | PAZ domain containing protein, putative, expressed,LOC_Os03g23050.1 | expressed protein		N/A		0	0	0	0	0	0	1	1	0	0	0	0	0	0	0	0	1	2
Bradi1g02056	No hits found		No hits found		N/A		0	0	0	0	0	0	0	2	0	0	0	0	4	0	1	1	0	0
Bradi1g02060	No hits found		LOC_Os03g54190.1 | expressed protein		N/A		0	0	0	0	0	0	0	0	1	0	0	0	0	0	1	1	0	0
Bradi1g02071	No hits found		No hits found		N/A		0	0	0	0	0	0	0	0	1	0	0	0	0	1	1	1	1	0
Bradi1g02080	AT2G02410.1 |		LOC_Os03g62610.1 | RNA-binding protein containing a PIN domain, putative, expressed		N/A		0	0	0	0	0	0	0	0	4	0	0	0	1	0	1	4	0	0
Bradi1g02090	AT2G44060.1 | Late embryogenesis abundant protein, group 2,AT2G44060.2 | Late embryogenesis abundant protein, group 2		LOC_Os03g62620.4 | late embryogenesis abundant protein, putative, expressed		N/A		0	0	0	0	0	1	0	0	1	0	0	0	1	0	0	0	0	0
Bradi1g02100	AT1G09630.1 | RAB GTPase 11C		LOC_Os03g62600.1 | ras-related protein, putative, expressed		N/A		0	0	0	0	0	2	0	0	0	0	0	0	1	0	0	0	0	0
Bradi1g02103	No hits found		LOC_Os03g54190.1 | expressed protein		N/A		0	1	0	0	0	0	0	0	1	0	0	0	0	0	1	9	1	0
Bradi1g02107	AT4G10020.1 | hydroxysteroid dehydrogenase 5		LOC_Os03g62590.1 | oxidoreductase, short chain dehydrogenase/reductase family domain containing protein, expressed		N/A		0	0	0	0	0	0	0	0	0	0	0	0	1	0	1	2	0	0
Bradi1g02117	AT3G19770.1 | Vacuolar sorting protein 9 (VPS9) domain		LOC_Os03g62580.1 | vacuolar sorting protein, putative, expressed		N/A		0	0	0	0	0	0	0	0	2	0	0	0	0	0	0	0	0	0
Bradi1g02130	AT3G49645.1 |		LOC_Os07g16140.1 | FAD binding protein, putative, expressed		N/A		1	0	0	0	1	0	2	0	2	1	0	0	0	0	0	0	0	0
Bradi1g02137	No hits found		LOC_Os09g06620.1 | OsFBX307 - F-box domain containing protein, expressed		N/A		0	0	0	0	0	2	0	1	0	0	0	0	1	0	1	3	0	0
Bradi1g02145	AT5G17710.1 | Co-chaperone GrpE family protein		LOC_Os01g32640.1 | OsFBX9 - F-box domain containing protein, expressed		N/A		0	1	0	0	2	1	1	0	1	0	0	0	0	0	1	1	0	0
Bradi1g02150	AT1G57770.1 | FAD/NAD(P)-binding oxidoreductase family protein		LOC_Os03g62510.1 | amine oxidase, flavin-containing, domain containing protein, expressed		N/A		0	0	0	1	1	0	0	0	1	0	0	0	1	0	1	1	0	0
Bradi1g02160	AT1G57870.2 | shaggy-like kinase 42		LOC_Os03g62500.1 | CGMC_GSK.5 - CGMC includes CDA, MAPK, GSK3, and CLKC kinases, expressed		N/A		0	0	0	2	0	0	0	0	1	0	0	0	0	0	0	0	0	0
Bradi1g02165	No hits found		LOC_Os11g24940.1 | expressed protein		N/A		0	0	0	0	0	0	0	0	0	0	0	0	0	0	1	2	0	0
Bradi1g02170	AT1G03860.1 | prohibitin 2		LOC_Os03g62490.1 | prohibitin-2, putative, expressed		N/A		0	1	0	0	0	1	0	0	0	0	0	0	1	0	1	1	1	0
Bradi1g02180	AT5G53840.1 | F-box/RNI-like/FBD-like domains-containing protein		LOC_Os07g45010.1 | expressed protein		N/A		0	2	1	0	0	0	0	0	1	0	0	0	1	0	0	0	1	0
Bradi1g02185	No hits found		LOC_Os11g24940.1 | expressed protein		N/A		0	0	0	0	0	1	0	0	3	0	0	0	2	1	1	2	1	0
Bradi1g02187	AT5G44950.1 | F-box/RNI-like/FBD-like domains-containing protein		LOC_Os07g45010.1 | expressed protein		N/A		0	0	0	0	0	0	0	1	0	0	0	0	0	1	1	5	0	0
Bradi1g02190	AT5G44950.1 | F-box/RNI-like/FBD-like domains-containing protein		LOC_Os07g45010.1 | expressed protein		N/A		0	0	0	0	0	1	0	0	0	0	0	0	0	0	1	4	1	1
Bradi1g02200	AT5G47550.1 | Cystatin/monellin superfamily protein		LOC_Os03g11180.1 | cysteine proteinase inhibitor 6 precursor, putative, expressed		N/A		0	0	0	1	0	0	1	0	1	0	1	0	1	0	0	0	0	0
Bradi1g02205	No hits found		No hits found		N/A		0	0	0	0	0	2	0	0	0	0	0	0	1	0	1	2	2	0
Bradi1g02210	AT1G16130.1 | wall associated kinase-like 2		LOC_Os03g62430.1 | OsWAK28 - OsWAK receptor-like protein kinase, expressed		N/A		0	0	0	0	0	0	0	0	1	0	0	0	0	3	1	1	0	0
Bradi1g02220	AT1G72170.1 | Domain of unknown function (DUF543)		LOC_Os03g62420.1 | expressed protein		N/A		0	0	0	1	0	0	0	1	0	0	0	0	0	1	1	2	3	0
Bradi1g02230	AT3G13880.1 | Tetratricopeptide repeat (TPR)-like superfamily protein		LOC_Os03g62400.1 | pentatricopeptide, putative, expressed		N/A		0	0	0	1	0	0	0	0	0	0	0	0	0	0	1	1	0	0
Bradi1g02240	AT2G26140.1 | FTSH protease 4		LOC_Os01g39260.1 | OsFtsH5 FtsH protease, homologue of AtFtsH4, expressed		N/A		0	1	0	0	1	0	1	0	1	0	0	0	0	0	1	2	0	0
Bradi1g02247	AT2G26140.1 | FTSH protease 4		LOC_Os01g39260.1 | OsFtsH5 FtsH protease, homologue of AtFtsH4, expressed		N/A		0	1	0	1	0	1	1	0	1	0	0	0	0	0	1	2	0	0
Bradi1g02253	No hits found		No hits found		N/A		0	1	1	0	0	2	0	0	1	0	0	0	0	0	1	2	0	0
Bradi1g02260	AT2G13690.1 | PRLI-interacting factor, putative		LOC_Os04g20920.1 | H-BTB2 - Bric-a-Brac, Tramtrack, Broad Complex BTB domain with H family conserved sequence, expressed		N/A		0	1	1	0	0	1	0	0	1	0	0	0	0	1	1	1	0	0
Bradi1g02270	AT1G21680.1 | DPP6 N-terminal domain-like protein		LOC_Os03g62370.1 | WD40-like Beta Propeller Repeat family protein, expressed		N/A		0	0	0	1	1	2	0	0	0	0	0	0	0	0	1	3	0	1
Bradi1g02273	No hits found		No hits found		N/A		0	1	0	0	0	0	0	0	3	0	0	0	0	0	1	11	0	0
Bradi1g02280	AT1G21210.1 | wall associated kinase 4		LOC_Os12g42070.1 | OsWAK129b - OsWAK receptor-like protein kinase, expressed		N/A		0	0	0	1	1	1	0	0	2	0	0	0	2	0	0	0	0	0
Bradi1g02290	AT1G77280.1 | Protein kinase protein with adenine nucleotide alpha hydrolases-like domain		LOC_Os03g62340.1 | protein kinase family protein, putative, expressed		N/A		0	0	0	0	0	0	0	0	0	0	0	0	1	2	1	1	1	0
Bradi1g02300	AT1G21695.1 | hydroxyproline-rich glycoprotein family protein		LOC_Os03g62330.1 | expressed protein		N/A		0	0	0	0	1	0	1	0	1	0	0	0	0	0	0	0	1	0
Bradi1g02303	AT5G56000.1 | HEAT SHOCK PROTEIN 81.4		LOC_Os09g30412.1 | heat shock protein, putative, expressed		N/A		0	0	0	1	0	0	0	0	0	0	0	0	1	0	0	0	0	0
Bradi1g02304	No hits found		LOC_Os10g22170.1 | expressed protein		N/A		0	0	0	1	0	0	0	0	0	0	0	0	1	0	0	0	0	0
Bradi1g02306	No hits found		No hits found		N/A		0	0	0	0	1	0	1	0	1	0	0	0	1	1	1	1	0	0
Bradi1g02310	AT3G55005.1 | tonneau 1b (TON1b)		LOC_Os11g01170.1 | tonneau 1b, putative, expressed		N/A		0	0	0	0	0	1	1	0	0	0	0	0	0	0	1	1	0	0
Bradi1g02327	AT2G37260.1 | WRKY family transcription factor family protein,AT2G38470.1 | WRKY DNA-binding protein 33		LOC_Os08g38990.3 | WRKY30, expressed,LOC_Os12g01180.1 | WRKY57, expressed		WRKY		0	0	0	0	0	1	0	0	0	0	0	0	2	1	0	0	3	0
Bradi1g02338	No hits found		LOC_Os06g03850.1 | impaired sucrose induction 1, putative, expressed		N/A		0	0	0	1	0	0	0	1	0	0	0	0	0	1	0	0	0	0
Bradi1g02350	AT3G45770.1 | Polyketide synthase, enoylreductase family protein		LOC_Os11g01154.1 | dehydrogenase, putative, expressed,LOC_Os11g01154.4 | dehydrogenase, putative, expressed		N/A		0	4	1	2	1	0	0	0	0	0	0	0	1	0	0	0	1	0
Bradi1g02361	No hits found		LOC_Os10g05540.1 | OsFBX373 - F-box domain containing protein, expressed		N/A		0	2	2	0	0	3	0	0	0	0	0	0	0	0	1	2	0	0
Bradi1g02370	AT1G71870.1 | MATE efflux family protein		LOC_Os03g62270.1 | MATE efflux family protein, putative, expressed		N/A		0	0	0	0	0	0	0	0	0	0	0	0	0	2	0	0	0	0
Bradi1g02380	AT3G24200.2 | FAD/NAD(P)-binding oxidoreductase family protein		LOC_Os03g62260.1 | FAD binding domain containing protein, expressed		N/A		0	0	0	0	1	1	1	0	0	0	0	0	2	0	1	1	0	0
Bradi1g02390	AT1G72175.1 | RING/U-box protein with domain of unknown function (DUF 1232)		LOC_Os03g62250.1 | zinc finger, C3HC4 type domain containing protein, expressed		N/A		0	0	0	0	0	0	0	0	0	0	1	0	0	0	0	0	0	0
Bradi1g02400	AT4G09620.1 | Mitochondrial transcription termination factor family protein		LOC_Os03g62240.1 | expressed protein		N/A		0	0	0	1	0	0	0	0	1	0	0	0	0	0	0	0	1	0
Bradi1g02410	AT1G34370.2 | C2H2 and C2HC zinc fingers superfamily protein		LOC_Os03g62230.1 | ZOS3-24 - C2H2 zinc finger protein, expressed		C2H2		1	0	0	0	2	1	0	0	1	0	0	0	0	0	0	0	0	0
Bradi1g02420	AT2G38290.1 | ammonium transporter 2		LOC_Os03g62200.1 | ammonium transporter protein, putative, expressed		N/A		0	1	0	0	0	1	0	0	1	0	0	0	0	0	0	0	0	0
Bradi1g02430	AT1G71950.1 | Proteinase inhibitor, propeptide		LOC_Os03g62210.1 | subtilisin N-terminal Region family protein, expressed		N/A		0	1	0	1	0	2	0	0	0	0	0	0	0	0	1	4	1	0
Bradi1g02440	AT1G34300.1 | lectin protein kinase family protein		LOC_Os03g62180.2 | lectin protein kinase family protein, putative, expressed		N/A		1	0	0	0	1	0	1	0	0	0	0	0	2	2	0	0	1	0
Bradi1g02450	AT5G08720.1 |		LOC_Os03g62170.1 | cyclase/dehydrase family protein, expressed		N/A		0	2	0	0	0	0	0	2	0	0	0	0	0	1	1	1	2	0
Bradi1g02460	AT2G33793.1 |		LOC_Os03g62160.1 | expressed protein,LOC_Os03g62160.2 | expressed protein		N/A		0	0	0	1	0	1	0	0	1	0	0	0	0	0	1	5	0	0
Bradi1g02465	AT4G19580.1 | DNAJ heat shock N-terminal domain-containing protein		LOC_Os03g62150.1 | heat shock protein DnaJ, putative, expressed		N/A		0	0	0	0	0	0	0	0	1	0	0	0	0	2	1	4	0	1
Bradi1g02470	No hits found		No hits found		N/A		0	0	0	1	1	1	0	0	1	0	0	0	0	0	1	2	0	0
Bradi1g02475	AT2G25560.1 | DNAJ heat shock N-terminal domain-containing protein		LOC_Os03g62120.1 | heat shock protein DnaJ, putative, expressed		N/A		0	1	1	0	0	0	0	1	0	0	0	0	0	0	0	0	0	0
Bradi1g02480	No hits found		No hits found		N/A		0	0	0	1	0	0	0	0	0	0	0	0	0	0	1	1	0	0
Bradi1g02483	No hits found		No hits found		N/A		0	0	0	0	0	0	0	0	0	0	0	0	1	0	1	1	0	0
Bradi1g02487	No hits found		LOC_Os02g58040.1 | OsFBX75 - F-box domain containing protein, expressed		N/A		0	1	0	0	0	1	0	0	0	0	0	0	1	0	1	3	1	0
Bradi1g02490	AT2G23420.1 | nicotinate phosphoribosyltransferase 2		LOC_Os03g62110.2 | nicotinate phosphoribosyltransferase family domain containing protein, expressed		N/A		0	0	0	0	0	0	0	0	0	0	0	0	0	0	0	0	0	0
Bradi1g02497	No hits found		No hits found		N/A		1	2	0	0	1	0	0	0	1	0	0	0	0	0	1	8	0	1
Bradi1g02505	No hits found		LOC_Os09g07160.1 | expressed protein		N/A		0	0	0	0	1	0	0	0	2	1	0	0	1	0	1	5	0	1
Bradi1g02510	AT5G64740.1 | cellulose synthase 6		LOC_Os03g62090.1 | CESA5 - cellulose synthase, expressed		N/A		0	0	0	0	0	2	0	0	0	0	0	0	2	0	1	2	0	0
Bradi1g02517	AT1G08370.1 | decapping 1		LOC_Os07g14580.1 | mRNA-decapping enzyme, putative, expressed		N/A		0	1	1	0	0	2	0	0	2	0	0	0	0	1	1	4	0	0
Bradi1g02530	AT3G02875.1 | Peptidase M20/M25/M40 family protein		LOC_Os03g62070.1 | hydrolase, putative, expressed		N/A		0	1	1	0	0	0	1	0	1	0	0	0	1	0	1	3	0	0
Bradi1g02535	AT5G22280.1 |		LOC_Os03g62030.1 | expressed protein		N/A		0	0	0	0	0	0	0	0	0	0	0	0	1	0	1	4	0	0
Bradi1g02540	AT4G21300.1 | Tetratricopeptide repeat (TPR)-like superfamily protein		LOC_Os01g25530.1 | pentatricopeptide repeat protein PPR986-12, putative, expressed		N/A		0	1	1	0	0	1	0	0	1	0	0	0	1	0	1	2	0	0
Bradi1g02550	AT4G28660.2 | photosystem II reaction center PSB28 protein		LOC_Os01g71190.1 | photosystem II reaction center PSB28 protein, chloroplast precursor, putative, expressed		N/A		0	0	0	1	0	0	1	0	2	0	0	0	3	0	1	1	1	0
Bradi1g02560	AT2G35460.1 | Late embryogenesis abundant (LEA) hydroxyproline-rich glycoprotein family		LOC_Os03g62010.1 | harpin-induced protein 1 domain containing protein, expressed		N/A		0	0	0	1	0	0	0	0	1	0	1	0	0	0	0	0	0	0
Bradi1g02570	AT3G26420.1 | RNA-binding (RRM/RBD/RNP motifs) family protein with retrovirus zinc finger-like domain		LOC_Os03g61990.4 | glycine-rich RNA-binding protein 7, putative, expressed		N/A		0	0	0	0	0	1	0	0	0	0	0	0	1	0	0	0	0	0
Bradi1g02575	AT1G19630.1 | cytochrome P450, family 722, subfamily A, polypeptide 1		LOC_Os03g61980.1 | cytochrome P450, putative, expressed		N/A		0	0	0	0	0	0	0	0	0	0	0	0	1	0	1	2	0	0
Bradi1g02580	AT5G09810.1 | actin 7		LOC_Os11g06390.6 | actin, putative, expressed		N/A		0	0	0	0	0	0	0	0	1	0	0	0	0	1	1	1	0	0
Bradi1g02590	AT2G27510.1 | ferredoxin 3		LOC_Os03g61960.2 | 2Fe-2S iron-sulfur cluster binding domain containing protein, expressed		N/A		0	0	0	0	0	0	0	0	2	0	0	0	0	0	0	0	0	0
Bradi1g02597	AT3G05420.1 | acyl-CoA binding protein 4		LOC_Os03g61930.1 | ACBP4, putative, expressed		N/A		0	1	0	0	0	0	0	0	1	0	0	0	2	2	0	0	0	0
Bradi1g02610	No hits found		No hits found		N/A		0	0	0	1	0	0	0	1	0	0	0	0	0	0	0	0	0	0
Bradi1g02615	AT2G36360.2 | Galactose oxidase/kelch repeat superfamily protein		LOC_Os03g61950.1 | kelch motif family protein, putative, expressed		N/A		0	2	1	0	1	0	1	0	1	0	0	0	0	0	1	1	0	0
Bradi1g02621	AT3G57660.1 | nuclear RNA polymerase A1		LOC_Os04g41490.1 | DNA-directed RNA polymerase III subunit RPC1, putative, expressed		N/A		0	0	0	0	0	0	0	0	1	0	0	0	0	1	0	0	0	0
Bradi1g02630	AT1G50940.1 | electron transfer flavoprotein alpha		LOC_Os03g61920.1 | electron transfer flavoprotein subunit alpha, mitochondrial precursor, putative, expressed		N/A		0	0	0	1	1	0	1	0	0	0	0	0	1	1	0	0	1	0
Bradi1g02635	No hits found		LOC_Os03g61900.1 | expressed protein		N/A		1	0	0	0	0	0	0	2	0	0	0	0	0	0	0	0	0	0
Bradi1g02637	No hits found		No hits found		N/A		0	0	0	0	0	0	0	0	0	0	0	0	0	0	1	1	2	0
Bradi1g02640	AT4G36020.1 | cold shock domain protein 1		LOC_Os08g03520.1 | retrotransposon protein, putative, Ty1-copia subclass, expressed		N/A		0	2	0	0	0	0	0	0	0	0	1	0	2	2	1	1	0	0
Bradi1g02645	No hits found		LOC_Os02g26794.1 | expressed protein		N/A		5	0	0	0	0	0	0	1	1	0	0	0	0	2	1	1	0	0
Bradi1g02650	AT2G21060.1 | glycine-rich protein 2B		LOC_Os08g03520.1 | retrotransposon protein, putative, Ty1-copia subclass, expressed		N/A		0	0	0	0	0	0	0	0	1	0	0	0	0	0	1	1	0	0
Bradi1g02670	AT3G48280.1 | cytochrome P450, family 71, subfamily A, polypeptide 25		LOC_Os01g12740.1 | cytochrome P450, putative, expressed		N/A		0	0	0	0	0	0	1	0	1	0	0	0	0	0	0	0	0	1
Bradi1g02680	AT4G02510.1 | translocon at the outer envelope membrane of chloroplasts 159		LOC_Os03g61890.2 | chloroplast protein import component Toc159, putative, expressed,LOC_Os03g61890.1 | chloroplast protein import component Toc159, putative, expressed		N/A		0	0	0	1	0	0	0	0	1	1	0	0	1	0	1	1	0	0
Bradi1g02685	No hits found		LOC_Os11g26580.1 | MEGL18 - Maternally expressed gene MEG family protein precursor, putative, expressed		N/A		0	0	0	0	0	0	0	1	0	0	0	0	0	0	0	0	0	0
Bradi1g02690	AT3G62040.1 | Haloacid dehalogenase-like hydrolase (HAD) superfamily protein		LOC_Os03g61829.1 | haloacid dehalogenase-like hydrolase family protein, putative, expressed		N/A		0	0	0	1	0	0	0	0	0	0	0	0	0	0	0	0	0	0
Bradi1g02697	AT5G26680.2 | 5\'-3\' exonuclease family protein		LOC_Os05g46270.1 | FEN1A - Putative flap endonuclease protein, expressed		N/A		0	1	0	0	0	1	0	0	2	0	0	0	0	1	1	2	0	0
Bradi1g02710	AT5G28050.1 | Cytidine/deoxycytidylate deaminase family protein		LOC_Os03g61810.1 | tRNA-specific adenosine deaminase, putative, expressed		N/A		0	1	1	0	0	0	0	0	6	0	0	0	0	0	1	2	1	0
Bradi1g02720	AT3G62110.1 | Pectin lyase-like superfamily protein		LOC_Os03g61800.1 | polygalacturonase, putative, expressed,LOC_Os03g61800.2 | polygalacturonase, putative, expressed		N/A		0	0	0	0	2	0	0	0	0	0	0	0	1	1	1	1	1	0
Bradi1g02730	AT5G22100.1 | RNA cyclase family protein		LOC_Os03g61790.1 | RNA 3-terminal phosphate cyclase, putative, expressed		N/A		0	0	0	0	0	1	0	0	1	0	1	0	1	0	0	0	0	2
Bradi1g02735	AT3G48280.1 | cytochrome P450, family 71, subfamily A, polypeptide 25		LOC_Os01g12740.1 | cytochrome P450, putative, expressed		N/A		0	0	0	1	0	2	0	0	1	0	0	0	0	0	0	0	2	0
Bradi1g02740	AT5G22100.1 | RNA cyclase family protein		LOC_Os03g61790.1 | RNA 3-terminal phosphate cyclase, putative, expressed		N/A		0	0	0	0	0	0	0	1	2	1	0	0	2	1	0	0	0	0
Bradi1g02750	AT1G09460.1 | Carbohydrate-binding X8 domain superfamily protein		LOC_Os03g61780.1 | glucan endo-1,3-beta-glucosidase-related, putative, expressed		N/A		0	0	0	2	0	0	0	0	0	0	0	0	0	1	0	0	0	1
Bradi1g02755	No hits found		No hits found		N/A		1	0	0	0	0	0	0	1	1	0	0	0	0	1	1	1	1	0
Bradi1g02760	AT3G60030.1 | squamosa promoter-binding protein-like 12		LOC_Os03g61760.1 | OsSPL6 - SBP-box gene family member, expressed		SBP		0	0	0	0	0	1	0	0	0	0	0	0	0	0	0	0	0	0
Bradi1g02770	AT3G07700.2 | Protein kinase superfamily protein		LOC_Os09g07660.2 | ELMO/CED-12 family protein, putative, expressed		N/A		0	0	0	1	0	0	1	1	2	0	0	0	1	0	1	1	0	0
Bradi1g02780	AT4G01880.1 | methyltransferases		LOC_Os03g61750.1 | expressed protein		N/A		0	1	0	0	0	0	0	0	0	0	0	0	0	0	0	0	0	0
Bradi1g02790	AT2G47140.1 | NAD(P)-binding Rossmann-fold superfamily protein		LOC_Os03g61740.1 | sex determination protein tasselseed-2, putative, expressed		N/A		0	0	0	1	0	0	0	0	0	0	0	0	0	3	1	2	2	0
Bradi1g02800	AT5G49580.1 | Chaperone DnaJ-domain superfamily protein		LOC_Os03g61730.1 | heat shock protein DnaJ, putative, expressed		N/A		0	0	0	0	0	1	0	1	1	0	0	0	0	1	1	5	0	0
Bradi1g02805	AT4G01950.1 | glycerol-3-phosphate acyltransferase 3		LOC_Os03g61720.1 | glycerol-3-phosphate acyltransferase, putative, expressed		N/A		0	0	0	0	2	1	1	1	0	0	0	0	2	0	1	1	1	1
Bradi1g02810	AT3G06580.1 | Mevalonate/galactokinase family protein		LOC_Os03g61710.1 | GHMP kinases ATP-binding protein, putative, expressed		N/A		0	0	0	0	0	1	0	0	0	0	0	0	0	1	0	0	0	0
Bradi1g02820	AT5G45890.1 | senescence-associated gene 12		LOC_Os09g21370.1 | cysteine proteinase EP-B 1 precursor, putative, expressed		N/A		0	0	0	1	0	0	0	0	1	1	0	0	0	0	1	2	0	0
Bradi1g02830	AT2G46260.1 | BTB/POZ/Kelch-associated protein		LOC_Os02g16000.1 | E1-BTB1 - Bric-a-Brac, Tramtrack, and Broad Complex domain with E1 subfamily conserved sequence, expressed		N/A		0	0	0	0	0	0	0	1	2	0	0	0	0	0	0	0	0	0
Bradi1g02840	AT3G61600.2 | POZ/BTB containin G-protein 1		LOC_Os02g16000.2 | E1-BTB1 - Bric-a-Brac, Tramtrack, and Broad Complex domain with E1 subfamily conserved sequence, expressed		N/A		0	0	0	1	0	0	0	0	1	0	0	0	0	1	0	0	0	0
Bradi1g02850	AT2G46260.1 | BTB/POZ/Kelch-associated protein		LOC_Os02g16000.1 | E1-BTB1 - Bric-a-Brac, Tramtrack, and Broad Complex domain with E1 subfamily conserved sequence, expressed		N/A		0	0	0	0	0	0	0	1	1	0	0	0	1	1	0	0	0	0
Bradi1g02860	No hits found		LOC_Os08g28550.1 | expressed protein		N/A		0	0	0	0	0	0	0	0	0	0	0	0	0	0	1	4	0	0
Bradi1g02870	AT3G11130.1 | Clathrin, heavy chain		LOC_Os12g01390.1 | clathrin heavy chain, putative, expressed		N/A		0	0	0	0	0	0	0	0	1	0	0	0	0	1	1	2	0	0
Bradi1g02880	AT2G46260.1 | BTB/POZ/Kelch-associated protein		LOC_Os02g16000.1 | E1-BTB1 - Bric-a-Brac, Tramtrack, and Broad Complex domain with E1 subfamily conserved sequence, expressed		N/A		0	0	0	0	0	0	0	0	1	0	0	0	1	0	1	2	0	0
Bradi1g02890	AT2G46260.1 | BTB/POZ/Kelch-associated protein		LOC_Os02g16000.2 | E1-BTB1 - Bric-a-Brac, Tramtrack, and Broad Complex domain with E1 subfamily conserved sequence, expressed		N/A		0	0	0	0	0	0	1	0	1	0	0	0	0	2	0	0	1	0
Bradi1g02900	AT2G46260.1 | BTB/POZ/Kelch-associated protein		LOC_Os02g16000.2 | E1-BTB1 - Bric-a-Brac, Tramtrack, and Broad Complex domain with E1 subfamily conserved sequence, expressed		N/A		0	1	0	0	1	1	0	0	0	0	0	0	0	0	1	3	0	0
Bradi1g02910	AT3G17030.1 | Nucleic acid-binding proteins superfamily		LOC_Os03g61700.1 | expressed protein		N/A		0	0	0	0	0	1	0	0	1	0	0	0	1	1	1	2	1	0
Bradi1g02920	AT3G17090.1 | Protein phosphatase 2C family protein		LOC_Os03g61690.1 | protein phosphatase 2C, putative, expressed		N/A		0	1	1	1	0	1	0	0	0	0	0	0	0	0	1	2	0	0
Bradi1g02930	AT3G06610.1 | DNA-binding enhancer protein-related		LOC_Os03g61680.1 | huntingtin-interacting protein HYPK, putative, expressed		N/A		0	0	0	0	0	0	0	1	0	0	0	0	1	1	0	0	0	0
Bradi1g02940	AT1G56340.2 | calreticulin 1a		LOC_Os03g61670.1 | calreticulin precursor, putative, expressed		N/A		0	1	1	0	0	0	0	0	0	0	0	0	0	0	1	3	0	0
Bradi1g02950	AT3G05760.1 | C2H2 and C2HC zinc fingers superfamily protein		LOC_Os03g61640.1 | ZOS3-23 - C2H2 zinc finger protein, expressed		N/A		0	1	1	1	0	0	0	2	0	0	0	0	0	1	0	0	0	0
Bradi1g02960	AT2G30050.1 | transducin family protein / WD-40 repeat family protein		LOC_Os03g61630.1 | WD domain, G-beta repeat domain containing protein, expressed		N/A		0	0	0	0	0	0	0	0	0	0	0	0	1	1	0	0	0	0
Bradi1g02970	AT1G48210.1 | Protein kinase superfamily protein		LOC_Os01g67340.1 | STRUBBELIG-RECEPTOR FAMILY 8 precursor, putative, expressed		N/A		0	1	0	0	0	0	0	0	1	0	0	0	0	1	0	0	0	0
Bradi1g02980	AT3G58650.1 |		LOC_Os03g61620.2 | expressed protein,LOC_Os03g61620.1 | expressed protein		N/A		0	0	0	0	0	0	0	0	1	0	0	0	0	0	1	1	0	1
Bradi1g02990	AT3G55010.2 | phosphoribosylformylglycinamidine cyclo-ligase, chloroplast / phosphoribosyl-aminoimidazole synthetase / AIR synthase (PUR5)		LOC_Os03g61600.1 | phosphoribosylformylglycinamidine synthase, putative, expressed		N/A		0	2	1	1	0	0	0	0	1	0	0	0	1	0	1	1	0	0
Bradi1g03000	AT2G47480.1 | Protein of unknown function (DUF3511)		LOC_Os03g61590.1 | expressed protein		N/A		0	0	0	0	0	0	1	0	1	0	0	0	1	0	0	0	2	0
Bradi1g03010	AT1G15030.1 | Protein of unknown function (DUF789),AT4G16100.1 | Protein of unknown function (DUF789)		LOC_Os03g61580.1 | expressed protein		N/A		0	0	0	0	0	0	0	0	0	0	0	0	0	2	1	1	0	0
Bradi1g03020	AT5G49300.1 | GATA transcription factor 16		LOC_Os03g61570.2 | expressed protein		GATA		0	1	0	0	2	1	3	0	1	0	0	0	0	0	1	2	0	0
Bradi1g03030	AT3G16810.1 | pumilio 24		LOC_Os03g61560.1 | expressed protein		N/A		0	0	0	0	1	0	1	1	2	0	0	0	0	1	1	5	0	0
Bradi1g03040	AT3G06778.1 | Chaperone DnaJ-domain superfamily protein		LOC_Os03g61550.1 | heat shock protein DnaJ, putative, expressed		N/A		0	0	0	1	0	2	0	0	2	0	0	0	2	1	1	3	0	0
Bradi1g03050	AT4G16070.1 | Mono-/di-acylglycerol lipase, N-terminal;Lipase, class 3		LOC_Os03g61540.1 | lipase class 3 family protein, putative, expressed,LOC_Os03g61540.2 | lipase class 3 family protein, putative, expressed		N/A		0	0	0	0	0	1	1	0	0	0	0	0	0	0	1	1	0	0
Bradi1g03056	AT5G20740.1 | Plant invertase/pectin methylesterase inhibitor superfamily protein		LOC_Os03g61530.1 | invertase/pectin methylesterase inhibitor family protein, putative, expressed		N/A		0	0	0	0	0	1	1	0	2	0	0	0	1	2	0	0	0	0
Bradi1g03063	AT1G13110.1 | cytochrome P450, family 71 subfamily B, polypeptide 7		LOC_Os02g17760.1 | cytochrome P450, putative, expressed		N/A		0	0	0	0	0	1	0	1	0	0	0	0	0	2	0	0	0	0
Bradi1g03070	AT5G64620.1 | cell wall / vacuolar inhibitor of fructosidase 2		LOC_Os03g61510.1 | pectinesterase inhibitor domain containing protein, expressed		N/A		0	1	0	0	0	0	0	0	0	0	0	0	0	1	1	2	0	0
Bradi1g03080	No hits found		LOC_Os03g61510.1 | pectinesterase inhibitor domain containing protein, expressed		N/A		0	0	0	1	0	0	1	1	1	0	0	0	0	0	1	4	0	1
Bradi1g03090	AT1G14870.1 | PLANT CADMIUM RESISTANCE 2		LOC_Os03g61470.1 | uncharacterized Cys-rich domain containing protein, putative, expressed		N/A		0	0	0	1	0	5	0	0	1	0	0	0	2	1	1	1	0	0
Bradi1g03100	No hits found		LOC_Os03g61410.1 | expressed protein		N/A		0	0	0	0	0	1	0	0	1	0	0	0	0	0	1	4	1	1
Bradi1g03105	AT4G00080.1 | Plant invertase/pectin methylesterase inhibitor superfamily protein		LOC_Os07g14340.1 | retrotransposon protein, putative, unclassified, expressed		N/A		0	0	0	1	1	0	1	0	1	0	0	0	0	0	1	2	0	0
Bradi1g03110	AT4G02340.1 | alpha/beta-Hydrolases superfamily protein		LOC_Os03g61360.1 | hydrolase, alpha/beta fold family domain containing protein, expressed		N/A		0	0	0	0	0	0	1	0	1	0	0	0	2	0	1	2	0	0
Bradi1g03120	AT4G02340.1 | alpha/beta-Hydrolases superfamily protein		LOC_Os03g61340.1 | hydrolase, alpha/beta fold family domain containing protein, expressed		N/A		0	0	0	0	0	3	0	1	0	0	0	0	0	0	1	2	0	0
Bradi1g03130	AT4G15940.1 | Fumarylacetoacetate (FAA) hydrolase family		LOC_Os03g61330.1 | fumarylacetoacetase, putative, expressed		N/A		0	1	0	0	0	0	0	0	1	0	0	0	0	0	0	0	0	0
Bradi1g03136	No hits found		LOC_Os07g23900.1 | OsFBX234 - F-box domain containing protein, expressed		N/A		0	0	0	1	0	2	0	0	2	0	0	0	0	0	0	0	0	1
Bradi1g03142	No hits found		LOC_Os07g02890.1 | OsFBX209 - F-box domain containing protein, expressed		N/A		0	1	1	0	0	0	0	0	0	0	0	0	0	0	1	1	0	0
Bradi1g03146	AT2G27300.1 | NTM1-like 8		LOC_Os03g61650.1 | expressed protein		NAC		0	0	0	0	0	0	0	0	3	0	0	0	0	0	1	1	0	0
Bradi1g03150	AT5G01470.1 | S-adenosyl-L-methionine-dependent methyltransferases superfamily protein		LOC_Os03g61140.1 | expressed protein		N/A		0	0	0	0	0	1	0	0	0	0	0	0	0	1	0	0	1	0
Bradi1g03160	AT5G15330.1 | SPX domain gene 4		LOC_Os03g61200.1 | expressed protein		N/A		0	0	0	0	0	0	1	0	0	0	0	0	1	2	0	0	1	0
Bradi1g03170	AT3G05940.1 | Protein of unknown function (DUF300)		LOC_Os03g61210.1 | domain of unknown function domain containing protein, expressed		N/A		0	0	0	1	0	1	0	0	1	0	0	0	0	1	1	2	0	0
Bradi1g03180	AT5G26742.2 | DEAD box RNA helicase (RH3)		LOC_Os03g61220.2 | DEAD-box ATP-dependent RNA helicase 3, putative, expressed		N/A		0	0	0	0	1	0	1	1	1	0	0	0	2	0	1	1	0	0
Bradi1g03185	No hits found		LOC_Os03g61240.1 | expressed protein		N/A		1	0	0	4	0	2	0	0	0	1	0	0	2	0	0	0	0	1
Bradi1g03191	No hits found		LOC_Os03g61240.1 | expressed protein		N/A		1	0	0	2	0	0	0	1	0	1	0	0	1	0	0	0	1	1
Bradi1g03196	AT1G66235.1 |		LOC_Os10g24040.1 | transposon protein, putative, Pong sub-class, expressed		N/A		0	2	1	1	0	0	0	0	0	0	0	0	0	1	1	3	0	0
Bradi1g03200	AT3G17630.1 | cation/H+ exchanger 19		LOC_Os03g61290.1 | ATCHX, putative, expressed		N/A		0	1	0	1	1	0	0	0	0	0	0	0	1	0	0	0	0	1
Bradi1g03207	AT5G66460.1 | Glycosyl hydrolase superfamily protein		LOC_Os03g61280.1 | OsMan05 - Endo-Beta-Mannanase, expressed		N/A		0	1	1	0	3	2	3	1	2	0	0	0	0	1	1	2	2	0
Bradi1g03220	AT1G48350.1 | Ribosomal L18p/L5e family protein		LOC_Os03g61260.1 | ribosomal L18p/L5e family protein, putative, expressed		N/A		0	0	0	0	0	1	0	0	0	0	0	0	0	0	1	1	0	0
Bradi1g03230	AT5G46950.1 | Plant invertase/pectin methylesterase inhibitor superfamily protein		LOC_Os02g46290.1 | invertase/pectin methylesterase inhibitor family protein, putative, expressed		N/A		0	0	0	1	0	0	0	0	1	0	0	0	1	0	1	4	0	0
Bradi1g03235	AT4G13460.2 | SU(VAR)3-9 homolog 9,AT4G13460.1 | SU(VAR)3-9 homolog 9		LOC_Os08g45130.1 | histone-lysine N-methyltransferase, putative, expressed		N/A		0	0	0	0	0	1	0	0	1	0	0	0	0	0	1	1	1	0
Bradi1g03240	AT5G46950.1 | Plant invertase/pectin methylesterase inhibitor superfamily protein		LOC_Os02g46290.1 | invertase/pectin methylesterase inhibitor family protein, putative, expressed		N/A		0	0	0	1	0	0	0	2	0	1	0	0	3	1	1	1	2	0
Bradi1g03245	AT3G55210.1 | NAC domain containing protein 63		LOC_Os03g61650.1 | expressed protein		NAC		0	1	1	0	2	0	0	0	0	0	0	0	0	2	1	4	0	0
Bradi1g03250	AT1G07230.1 | non-specific phospholipase C1		LOC_Os03g61130.1 | phosphoesterase family protein, putative, expressed		N/A		0	1	0	0	1	0	1	1	0	0	0	0	1	0	1	1	0	1
Bradi1g03260	AT5G05730.1 | anthranilate synthase alpha subunit 1		LOC_Os03g61120.1 | anthranilate synthase component I-1, chloroplast precursor, putative, expressed		N/A		0	0	0	0	2	1	2	0	1	0	0	0	1	3	0	0	1	0
Bradi1g03270	AT3G47120.1 | RNA recognition motif (RRM)-containing protein		LOC_Os03g61110.1 | RNA-binding motif protein, putative, expressed		N/A		1	0	0	0	0	1	0	0	0	0	0	0	0	0	1	1	0	0
Bradi1g03277	AT5G06740.1 | Concanavalin A-like lectin protein kinase family protein		LOC_Os02g06160.1 | cysteine-rich receptor-like protein kinase 16 precursor, putative, expressed		N/A		0	0	0	0	0	0	0	0	2	0	0	0	0	1	1	1	2	0
Bradi1g03283	No hits found		LOC_Os07g45920.1 | retrotransposon protein, putative, unclassified, expressed		N/A		0	0	0	0	0	0	2	0	1	0	0	0	1	1	1	8	0	0
Bradi1g03290	AT5G01470.1 | S-adenosyl-L-methionine-dependent methyltransferases superfamily protein		LOC_Os03g61140.1 | expressed protein		N/A		0	1	0	0	0	1	0	0	0	0	0	0	0	0	1	1	0	0
Bradi1g03307	AT5G03970.2 | F-box associated ubiquitination effector family protein		LOC_Os07g23900.1 | OsFBX234 - F-box domain containing protein, expressed		N/A		0	0	0	0	0	0	0	0	1	0	0	0	1	0	0	0	0	0
Bradi1g03313	No hits found		LOC_Os03g61650.1 | expressed protein		NAC		0	0	0	0	0	0	0	0	3	0	0	0	1	0	1	2	0	0
Bradi1g03320	No hits found		LOC_Os01g37670.1 | OsFBX15 - F-box domain containing protein, expressed		N/A		0	0	0	0	0	1	0	0	0	0	0	0	0	0	0	0	0	1
Bradi1g03330	AT5G04110.1 | DNA GYRASE B3		LOC_Os01g63354.1 | ELM2 domain containing protein, putative, expressed		N/A		0	0	0	1	0	0	0	0	0	0	0	0	2	3	0	0	0	0
Bradi1g03340	No hits found		LOC_Os03g61090.1 | expressed protein		N/A		0	1	0	0	0	0	0	0	0	0	0	0	1	0	0	0	0	0
Bradi1g03350	AT1G07290.1 | golgi nucleotide sugar transporter 2		LOC_Os03g61100.1 | GDP-mannose transporter, putative, expressed		N/A		0	2	1	0	0	0	0	1	0	0	0	0	0	0	1	1	0	0
Bradi1g03355	No hits found		No hits found		N/A		0	0	0	1	0	0	0	0	0	0	0	0	0	1	1	2	0	0
Bradi1g03360	AT5G10530.1 | Concanavalin A-like lectin protein kinase family protein		LOC_Os02g06160.1 | cysteine-rich receptor-like protein kinase 16 precursor, putative, expressed		N/A		0	0	0	0	0	1	0	0	1	0	0	0	0	1	1	2	0	2
Bradi1g03367	AT5G58940.1 | calmodulin-binding receptor-like cytoplasmic kinase 1		LOC_Os03g61060.1 | protein kinase domain containing protein, expressed,LOC_Os03g61060.2 | protein kinase domain containing protein, expressed		N/A		0	0	0	1	0	0	0	0	0	0	0	0	0	2	1	2	0	0
Bradi1g03380	AT3G09090.1 | defective in exine formation protein (DEX1)		LOC_Os03g61050.1 | FG-GAP repeat-containing protein, putative, expressed		N/A		0	0	0	0	1	0	0	1	0	0	0	0	0	1	0	0	1	0
Bradi1g03392	AT5G58960.1 | Plant protein of unknown function (DUF641)		LOC_Os03g61040.1 | GIL1, putative, expressed		N/A		0	0	0	1	1	0	0	0	1	0	0	0	0	1	1	4	1	0
Bradi1g03400	AT3G09210.1 | plastid transcriptionally active 13		LOC_Os03g61030.1 | transcription termination factor nusG family protein, expressed		N/A		0	1	0	0	0	1	0	0	0	0	0	0	0	1	1	3	0	0
Bradi1g03410	AT2G29530.2 | Tim10/DDP family zinc finger protein		LOC_Os03g61019.1 | mitochondrial import inner membrane translocase subunit Tim, putative, expressed		N/A		0	2	0	0	0	0	0	0	0	0	0	0	2	1	1	6	1	0
Bradi1g03420	AT5G59010.1 | Protein kinase protein with tetratricopeptide repeat domain		LOC_Os03g61010.1 | protein kinase family protein, putative, expressed		N/A		0	0	0	0	0	0	0	0	0	1	0	0	0	0	1	1	0	0
Bradi1g03431	No hits found		LOC_Os10g33490.1 | expressed protein		N/A		0	0	0	0	0	0	0	0	0	0	0	0	2	0	0	0	0	0
Bradi1g03440	AT3G13440.1 | S-adenosyl-L-methionine-dependent methyltransferases superfamily protein		LOC_Os03g60920.1 | Methyltransferase small domain containing protein, expressed		N/A		0	1	0	0	0	0	0	0	1	0	0	0	0	0	1	14	0	0
Bradi1g03450	AT1G74850.1 | plastid transcriptionally active 2		LOC_Os03g60910.1 | PPR repeat domain containing protein, putative, expressed		N/A		1	3	1	0	0	1	0	0	2	1	0	0	0	0	1	2	1	0
Bradi1g03460	AT4G09550.1 | AtGCP3 interacting protein 1		LOC_Os03g32150.1 | expressed protein		N/A		0	0	0	2	0	0	0	0	2	0	0	0	0	1	1	2	0	0
Bradi1g03470	AT5G57580.1 | Calmodulin-binding protein		LOC_Os03g32160.1 | calmodulin binding protein, putative, expressed		N/A		0	0	0	0	0	1	0	0	0	0	0	0	1	1	0	0	0	0
Bradi1g03480	AT5G62890.1 | Xanthine/uracil permease family protein		LOC_Os03g60880.1 | nucleobase-ascorbate transporter, putative, expressed		N/A		0	0	0	0	0	1	1	0	1	0	0	0	1	0	1	2	1	0
Bradi1g03483	No hits found		No hits found		N/A		1	0	0	0	0	0	0	0	1	0	0	0	0	0	1	2	0	0
Bradi1g03486	AT5G62890.3 | Xanthine/uracil permease family protein		LOC_Os03g60880.1 | nucleobase-ascorbate transporter, putative, expressed		N/A		0	1	0	0	0	0	0	1	1	0	0	0	0	1	1	1	1	0
Bradi1g03490	AT1G07410.1 | RAB GTPase homolog A2B		LOC_Os03g60870.1 | ras-related protein, putative, expressed		N/A		0	0	0	1	0	0	0	0	2	0	0	0	2	0	1	1	0	0
Bradi1g03500	AT3G53960.1 | Major facilitator superfamily protein		LOC_Os03g60850.1 | peptide transporter PTR2, putative, expressed		N/A		0	0	0	0	0	0	0	0	1	0	0	0	1	0	1	1	0	0
Bradi1g03510	No hits found		LOC_Os03g60840.1 | BBTI13 - Bowman-Birk type bran trypsin inhibitor precursor, expressed		N/A		0	0	0	0	1	1	0	0	0	0	0	0	0	1	1	1	0	0
Bradi1g03520	AT2G39760.2 | BTB/POZ/MATH-domains containing protein		LOC_Os10g29310.1 | MBTB51 - Bric-a-Brac, Tramtrack, Broad Complex BTB domain with Meprin and TRAF Homology MATH domain, expressed		N/A		0	0	0	0	0	1	0	0	3	0	0	0	1	1	1	2	0	1
Bradi1g03530	AT5G59250.1 | Major facilitator superfamily protein		LOC_Os03g60820.1 | transporter, major facilitator superfamily domain containing protein, expressed,LOC_Os10g42830.1 | transporter family protein, putative, expressed		N/A		1	0	0	0	0	0	0	0	1	0	0	0	0	0	1	1	0	1
Bradi1g03537	AT3G53810.1 | Concanavalin A-like lectin protein kinase family protein		LOC_Os03g60810.1 | lectin-like receptor kinase, putative, expressed		N/A		0	0	0	0	0	0	0	0	0	0	0	0	1	0	1	2	0	0
Bradi1g03550	AT1G67550.1 | urease		ChrSy.fgenesh.mRNA.49 | expressed protein		N/A		0	1	1	0	0	0	0	0	0	0	0	0	0	1	1	1	0	0
Bradi1g03555	No hits found		No hits found		N/A		0	0	0	0	0	1	0	0	1	0	0	0	1	1	0	0	0	0
Bradi1g03560	AT1G13870.1 | calmodulin binding;purine nucleotide binding		No hits found		N/A		1	0	0	1	0	0	0	0	0	0	0	0	2	0	1	3	0	0
Bradi1g03580	AT5G59610.1 | Chaperone DnaJ-domain superfamily protein		LOC_Os03g60790.1 | heat shock protein DnaJ, putative, expressed		N/A		1	0	0	0	0	0	0	0	1	0	0	0	1	0	1	1	0	0
Bradi1g03590	AT3G09350.1 | Fes1A,AT3G09350.3 | Fes1A		LOC_Os03g60780.1 | armadillo/beta-catenin-like repeat containing protein, expressed		N/A		0	1	0	0	0	1	0	0	1	0	0	0	2	1	0	0	0	0
Bradi1g03595	AT5G02220.1 |		LOC_Os03g60760.1 | expressed protein		N/A		0	1	0	1	0	0	0	0	0	0	0	0	2	1	1	7	0	0
Bradi1g03600	AT5G13830.1 | FtsJ-like methyltransferase family protein		LOC_Os03g60750.1 | ribosomal RNA large subunit methyltransferase J, putative, expressed		N/A		0	0	0	1	0	1	0	0	1	0	0	0	3	0	1	2	0	0
Bradi1g03605	No hits found		No hits found		N/A		0	0	0	0	0	0	0	0	4	0	0	0	1	1	1	4	0	0
Bradi1g03610	AT2G37660.1 | NAD(P)-binding Rossmann-fold superfamily protein		LOC_Os03g60740.1 | expressed protein		N/A		0	0	0	0	0	0	2	0	3	0	0	0	0	0	1	3	0	0
Bradi1g03620	AT1G07530.1 | SCARECROW-like 14		LOC_Os04g50060.1 | GRAS family transcription factor domain containing protein, expressed,LOC_Os04g50060.2 | GRAS family transcription factor domain containing protein, expressed		GRAS		0	3	0	0	0	0	0	0	1	0	0	0	2	0	0	0	0	0
Bradi1g03627	No hits found		No hits found		N/A		0	0	0	2	0	0	0	0	0	0	0	0	0	0	1	2	0	0
Bradi1g03633	No hits found		No hits found		N/A		0	0	0	0	0	0	1	0	1	0	0	0	1	0	1	5	1	1
Bradi1g03640	AT3G55500.1 | expansin A16		LOC_Os03g60720.1 | expansin precursor, putative, expressed		N/A		0	1	0	0	0	1	0	0	0	0	0	0	0	0	1	8	0	0
Bradi1g03650	AT1G07570.1 | Protein kinase superfamily protein		LOC_Os03g60710.1 | protein kinase domain containing protein, expressed		N/A		0	1	0	0	0	0	0	0	0	0	0	0	0	1	1	1	0	0
Bradi1g03660	AT2G39630.1 | Nucleotide-diphospho-sugar transferases superfamily protein		LOC_Os03g60700.1 | dolichyl-phosphate beta-glycosyltransferase, putative, expressed		N/A		0	0	0	0	1	0	0	0	0	0	0	0	0	2	1	1	0	0
Bradi1g03670	AT4G21065.1 | Tetratricopeptide repeat (TPR)-like superfamily protein		LOC_Os03g60690.1 | pentatricopeptide, putative, expressed		N/A		0	0	0	1	0	0	0	0	1	0	0	0	1	0	0	0	0	0
Bradi1g03672	No hits found		LOC_Os07g03040.1 | expressed protein		N/A		0	0	0	0	0	0	0	0	0	0	0	0	0	0	0	0	0	0
Bradi1g03675	No hits found		LOC_Os03g60660.1 | expressed protein		N/A		0	0	0	0	0	1	0	0	1	0	0	0	0	0	0	0	1	0
Bradi1g03681	No hits found		LOC_Os03g60660.1 | expressed protein		N/A		0	0	0	0	0	0	0	2	2	0	0	0	0	0	0	0	0	0
Bradi1g03686	No hits found		No hits found		N/A		0	1	0	1	0	0	0	0	1	0	0	0	1	0	0	0	0	1
Bradi1g03690	AT1G07630.1 | pol-like 5		LOC_Os03g60650.1 | protein phosphatase 2C, putative, expressed		N/A		0	0	0	0	0	1	0	0	4	0	0	0	0	2	1	7	0	0
Bradi1g03700	AT5G02450.1 | Ribosomal protein L36e family protein		LOC_Os01g62350.1 | 60S ribosomal protein L36-2, putative, expressed		N/A		0	0	0	0	0	1	0	0	0	0	0	0	0	2	1	1	0	0
Bradi1g03710	AT3G55370.2 | OBF-binding protein 3,AT3G55370.3 | OBF-binding protein 3		LOC_Os03g60630.1 | dof zinc finger domain containing protein, putative, expressed		Dof		0	0	0	0	0	0	0	1	0	0	0	0	0	0	0	0	0	0
Bradi1g03720	AT5G02500.1 | heat shock cognate protein 70-1		LOC_Os11g47760.1 | DnaK family protein, putative, expressed		N/A		0	1	1	0	1	0	0	0	1	0	0	0	1	1	1	1	0	0
Bradi1g03730	AT3G46450.1 | SEC14 cytosolic factor family protein / phosphoglyceride transfer family protein		LOC_Os03g60610.3 | SEC14 cytosolic factor family protein, putative, expressed		N/A		0	0	0	0	1	1	2	0	3	0	0	0	2	1	0	0	0	0
Bradi1g03737	AT1G75560.2 | zinc knuckle (CCHC-type) family protein,AT1G75560.1 | zinc knuckle (CCHC-type) family protein		LOC_Os03g60600.1 | zinc knuckle domain containing protein, expressed		N/A		0	1	0	0	0	0	0	0	1	0	0	0	1	0	0	0	0	0
Bradi1g03750	AT5G59890.1 | actin depolymerizing factor 4		LOC_Os04g46910.1 | actin-depolymerizing factor, putative, expressed		N/A		0	1	1	0	1	1	1	0	0	0	0	0	0	0	1	1	1	0
Bradi1g03760	AT5G59880.1 | actin depolymerizing factor 3		LOC_Os03g60580.1 | actin-depolymerizing factor, putative, expressed		N/A		0	1	0	0	1	2	1	0	0	0	0	0	1	0	1	4	0	0
Bradi1g03770	AT3G46080.1 | C2H2-type zinc finger family protein		LOC_Os03g60560.1 | ZOS3-21 - C2H2 zinc finger protein, expressed		C2H2		0	0	0	0	0	0	0	0	2	0	0	0	0	1	1	3	0	0
Bradi1g03780	AT3G46080.1 | C2H2-type zinc finger family protein		LOC_Os03g60570.1 | ZOS3-22 - C2H2 zinc finger protein, expressed		C2H2		0	0	0	0	1	0	1	0	2	0	0	0	0	0	1	7	0	0
Bradi1g03790	AT5G59820.1 | C2H2-type zinc finger family protein		LOC_Os03g60560.1 | ZOS3-21 - C2H2 zinc finger protein, expressed		C2H2		1	0	0	0	0	1	0	0	1	0	0	0	1	0	1	5	0	0
Bradi1g03800	AT1G05180.1 | NAD(P)-binding Rossmann-fold superfamily protein		LOC_Os03g60550.1 | ThiF family domain containing protein, putative, expressed		N/A		0	1	0	1	0	0	0	0	0	0	0	0	2	3	0	0	0	0
Bradi1g03810	AT5G59820.1 | C2H2-type zinc finger family protein		LOC_Os03g60540.1 | ZOS3-20 - C2H2 zinc finger protein, expressed		C2H2		1	1	0	0	0	0	0	1	0	0	0	0	1	0	1	3	1	0
Bradi1g03820	AT3G46060.1 | RAB GTPase homolog 8A		LOC_Os07g13530.1 | ras-related protein, putative, expressed		N/A		0	2	1	0	0	1	1	0	0	0	0	0	0	1	1	5	0	0
Bradi1g03827	AT3G53540.1 |		LOC_Os03g60520.1 | expressed protein		N/A		0	0	0	1	2	0	0	0	0	0	0	0	0	0	1	2	0	0
Bradi1g03840	AT3G55120.1 | Chalcone-flavanone isomerase family protein		LOC_Os03g60509.2 | expressed protein		N/A		0	0	0	0	0	0	0	0	0	0	0	0	3	2	0	0	1	0
Bradi1g03850	AT2G37390.1 | Chloroplast-targeted copper chaperone protein		LOC_Os03g60480.1 | heavy metal-associated domain containing protein, expressed		N/A		0	0	0	0	0	1	1	0	0	0	0	0	0	2	0	0	0	0
Bradi1g03853	No hits found		No hits found		N/A		0	0	0	0	0	0	0	0	0	0	0	0	0	1	0	0	1	0
Bradi1g03856	No hits found		No hits found		N/A		0	0	0	0	0	1	0	0	1	0	0	0	1	0	0	0	0	0
Bradi1g03860	AT5G13520.1 | peptidase M1 family protein		LOC_Os03g60460.1 | aminopeptidase, putative, expressed		N/A		0	0	0	0	0	0	1	1	1	0	0	0	0	1	0	0	2	0
Bradi1g03867	No hits found		LOC_Os12g27790.1 | OsFBX443 - F-box domain containing protein, expressed		N/A		0	1	0	0	0	0	0	1	1	0	0	0	0	0	1	1	1	0
Bradi1g03880	AT2G28550.3 | related to AP2.7		LOC_Os03g60430.2 | AP2 domain containing protein, expressed,LOC_Os03g60430.1 | AP2 domain containing protein, expressed		AP2		0	0	0	0	0	0	0	0	2	0	0	0	3	0	1	3	0	0
Bradi1g03890	AT2G22640.1 | BRICK1, putative		No hits found		N/A		0	0	0	0	0	1	0	0	2	0	0	0	0	0	1	1	0	0
Bradi1g03900	AT5G05610.1 | alfin-like 1		LOC_Os03g60390.1 | PHD finger protein, putative, expressed		N/A		0	0	0	0	0	0	0	0	0	0	0	0	2	0	1	3	0	0
Bradi1g03910	AT5G58490.1 | NAD(P)-binding Rossmann-fold superfamily protein		LOC_Os03g60380.1 | cinnamoyl CoA reductase, putative, expressed		N/A		0	1	1	0	0	2	0	0	2	0	0	0	0	1	1	2	1	0
Bradi1g03920	AT1G09870.1 | histidine acid phosphatase family protein		LOC_Os03g60370.1 | histidine acid phosphatase, putative, expressed		N/A		0	1	0	0	2	0	2	0	1	0	0	0	0	0	1	1	0	0
Bradi1g03925	ATCG00420.1 | NADH dehydrogenase subunit J		LOC_Os10g21258.1 | NADPH-dependent oxidoreductase, putative, expressed		N/A		0	1	0	0	0	2	0	0	1	0	0	0	1	0	1	3	0	0
Bradi1g03930	AT3G14750.1 |		LOC_Os03g60360.1 | protein kinase PKN/PRK1, effector, putative, expressed		N/A		1	0	0	0	0	0	0	0	0	0	0	0	0	0	1	1	0	0
Bradi1g03940	AT2G40320.1 | TRICHOME BIREFRINGENCE-LIKE 33		LOC_Os03g60350.1 | leaf senescence related protein, putative, expressed		N/A		0	1	1	0	1	0	1	0	0	0	0	0	3	0	1	1	0	0
Bradi1g03947	AT3G11030.1 | TRICHOME BIREFRINGENCE-LIKE 32		LOC_Os03g60340.1 | leaf senescence related protein, putative, expressed		N/A		0	0	0	0	0	0	0	0	0	0	0	0	2	0	1	2	0	0
Bradi1g03950	No hits found		LOC_Os01g56020.1 | expressed protein		N/A		0	0	0	0	0	1	1	1	1	0	0	0	0	0	1	2	0	0
Bradi1g03951	No hits found		No hits found		N/A		0	0	0	0	0	2	0	1	0	0	0	0	0	0	0	0	0	1
Bradi1g03953	No hits found		LOC_Os02g55570.1 | shugoshin-1, putative, expressed		N/A		0	0	0	0	0	2	0	0	0	0	0	0	0	0	0	0	0	0
Bradi1g03954	No hits found		No hits found		N/A		0	2	0	0	0	1	0	1	0	0	0	0	2	0	1	1	0	0
Bradi1g03956	No hits found		No hits found		N/A		0	0	0	0	0	1	0	0	1	0	0	0	0	0	1	5	1	0
Bradi1g03962	No hits found		No hits found		N/A		0	0	0	0	0	0	0	0	1	0	0	0	1	0	1	1	1	0
Bradi1g03965	No hits found		No hits found		N/A		0	1	0	0	0	1	0	0	0	1	0	0	0	0	1	3	0	0
Bradi1g03972	AT2G38320.1 | TRICHOME BIREFRINGENCE-LIKE 34		LOC_Os03g60300.1 | expressed protein		N/A		0	0	0	1	2	2	0	0	0	0	0	0	0	0	1	1	0	0
Bradi1g03977	No hits found		No hits found		N/A		0	0	0	0	0	0	0	0	0	0	0	0	0	0	1	1	1	1
Bradi1g03980	AT3G11900.1 | aromatic and neutral transporter 1		LOC_Os03g60260.1 | ANT1, putative, expressed		N/A		0	1	1	0	1	1	0	1	2	0	0	0	0	0	1	2	0	0
Bradi1g03990	AT5G16780.1 | SART-1 family		LOC_Os02g30730.1 | SART-1 family protein, putative, expressed,LOC_Os02g30730.2 | SART-1 family protein, putative, expressed		N/A		0	0	0	0	0	1	0	0	1	0	0	0	1	1	0	0	1	0
Bradi1g04000	AT2G38440.1 | SCAR homolog 2		LOC_Os03g60240.1 | SCAR-like protein 1, putative, expressed		N/A		0	0	0	0	0	1	0	0	2	0	0	0	0	2	0	0	1	0
Bradi1g04010	AT5G01750.2 | Protein of unknown function (DUF567)		LOC_Os03g60220.1 | DUF567 domain containing protein, putative, expressed		N/A		0	1	1	0	0	1	1	0	1	0	0	0	0	0	1	2	0	0
Bradi1g04015	No hits found		No hits found		N/A		0	0	0	0	1	1	0	0	2	1	0	0	0	0	1	4	0	0
Bradi1g04020	AT5G01750.2 | Protein of unknown function (DUF567)		LOC_Os03g60220.1 | DUF567 domain containing protein, putative, expressed		N/A		0	0	0	0	1	0	0	1	1	0	0	0	2	2	1	1	1	0
Bradi1g04030	AT3G14160.1 | 2-oxoglutarate-dependent dioxygenase family protein		LOC_Os03g60190.1 | oxidoreductase, 2OG-Fe oxygenase family protein, putative, expressed		N/A		0	0	0	2	0	2	0	0	1	0	0	0	0	1	1	2	1	0
Bradi1g04040	No hits found		LOC_Os05g27000.1 | expressed protein		N/A		0	0	0	1	0	0	0	1	1	0	0	0	2	0	1	2	0	0
Bradi1g04050	No hits found		No hits found		N/A		1	0	0	1	0	1	0	1	0	0	0	0	2	2	1	2	0	2
Bradi1g04055	AT5G41220.1 | glutathione S-transferase THETA 3		LOC_Os12g12690.1 | transposon protein, putative, Pong sub-class, expressed		N/A		0	0	0	0	0	0	0	0	0	0	0	0	0	0	1	1	0	0
Bradi1g04060	AT5G58370.2 | P-loop containing nucleoside triphosphate hydrolases superfamily protein		LOC_Os03g60180.1 | GTPase of unknown function domain containing protein, putative, expressed		N/A		0	0	0	0	0	0	0	0	1	0	0	0	0	0	1	1	0	0
Bradi1g04070	AT2G40510.1 | Ribosomal protein S26e family protein		LOC_Os05g39960.1 | 40S ribosomal protein S26, putative, expressed		N/A		0	0	0	1	0	0	0	0	1	0	0	1	2	0	1	1	0	0
Bradi1g04080	AT5G01850.1 | Protein kinase superfamily protein		LOC_Os03g60150.1 | protein kinase domain containing protein, expressed		N/A		0	0	0	0	1	0	1	1	0	0	0	0	1	1	1	2	0	0
Bradi1g04090	AT2G40640.1 | RING/U-box superfamily protein		LOC_Os03g60140.1 | U-box domain-containing protein, putative, expressed		N/A		0	0	0	0	0	0	0	0	0	0	0	0	0	0	0	0	0	0
Bradi1g04097	AT2G38560.1 | transcript elongation factor IIS		LOC_Os03g60130.1 | transcription elongation factor protein, putative, expressed		N/A		0	0	0	0	0	0	0	0	2	0	0	0	0	0	1	1	0	0
Bradi1g04110	AT4G27950.1 | cytokinin response factor 4		LOC_Os03g60120.1 | AP2 domain containing protein, expressed		ERF		0	0	0	0	0	0	0	0	2	0	0	0	1	1	1	1	2	0
Bradi1g04120	AT2G38610.2 | RNA-binding KH domain-containing protein,AT2G38610.1 | RNA-binding KH domain-containing protein		LOC_Os03g60110.1 | KH domain containing protein, putative, expressed		N/A		0	0	0	0	1	0	1	0	1	0	0	0	1	0	0	0	0	0
Bradi1g04125	No hits found		No hits found		N/A		0	0	0	0	1	0	0	0	1	0	0	0	0	0	0	0	0	0
Bradi1g04130	AT3G54210.1 | Ribosomal protein L17 family protein		LOC_Os03g60100.1 | 50S ribosomal protein L17, putative, expressed		N/A		0	0	0	0	0	0	0	1	0	0	0	0	0	0	1	1	0	0
Bradi1g04135	No hits found		No hits found		N/A		0	0	0	0	0	0	0	0	0	0	0	0	0	1	1	2	0	0
Bradi1g04140	AT2G44160.1 | methylenetetrahydrofolate reductase 2		LOC_Os03g60090.1 | methylenetetrahydrofolate reductase, putative, expressed		N/A		0	0	0	1	2	0	1	0	1	0	0	0	0	1	1	2	0	0
Bradi1g04145	No hits found		No hits found		N/A		0	0	0	1	1	1	0	2	1	0	0	0	0	0	1	5	0	2
Bradi1g04150	AT5G63790.1 | NAC domain containing protein 102		LOC_Os03g60080.1 | NAC domain-containing protein 67, putative, expressed		NAC		0	1	1	0	0	0	0	0	0	0	0	0	0	0	1	2	0	2
Bradi1g04160	AT2G36620.1 | ribosomal protein L24		LOC_Os05g40820.1 | ribosomal protein L24, putative, expressed		N/A		0	0	0	0	1	2	0	1	0	0	0	0	0	0	1	2	0	0
Bradi1g04170	AT5G44460.1 | calmodulin like 43		LOC_Os03g59770.1 | EF hand family protein, putative, expressed		N/A		0	0	0	0	0	0	0	0	0	0	0	0	1	1	0	0	0	0
Bradi1g04180	AT1G55530.1 | RING/U-box superfamily protein		LOC_Os03g59760.1 | RING finger protein 126, putative, expressed,LOC_Os03g59760.2 | RING finger protein 126, putative, expressed		N/A		0	0	0	1	0	1	0	2	1	0	0	0	0	1	1	2	0	0
Bradi1g04191	No hits found		No hits found		N/A		0	1	1	0	0	0	0	1	1	0	0	0	1	0	1	3	1	0
Bradi1g04200	AT3G45600.1 | tetraspanin3		LOC_Os05g03140.1 | tetraspanin family protein, putative, expressed		N/A		0	0	0	1	1	2	0	0	1	0	0	0	1	0	1	3	0	0
Bradi1g04210	AT3G10690.1 | DNA GYRASE A		LOC_Os02g47150.1 | DNA topoisomerase 2, putative, expressed		N/A		0	0	0	0	0	0	0	0	0	0	0	0	0	1	1	1	0	0
Bradi1g04215	No hits found		No hits found		N/A		0	0	0	1	0	0	0	0	0	0	0	0	3	1	0	0	0	0
Bradi1g04220	AT1G10630.1 | ADP-ribosylation factor A1F		LOC_Os03g59740.3 | ADP-ribosylation factor, putative, expressed		N/A		0	1	1	0	0	1	0	0	0	0	0	0	0	0	0	0	0	0
Bradi1g04226	AT3G10530.1 | Transducin/WD40 repeat-like superfamily protein		LOC_Os01g08770.1 | WD domain, G-beta repeat domain containing protein, expressed		N/A		0	1	0	0	0	1	0	0	1	0	0	0	1	0	1	24	0	0
Bradi1g04229	AT1G62700.1 | Arabidopsis NAC domain containing protein 26		LOC_Os03g59730.1 | No apical meristem protein, putative, expressed		NAC		0	1	0	0	0	1	0	0	0	0	0	0	0	0	1	2	2	0
Bradi1g04232	AT5G20180.2 | Ribosomal protein L36		LOC_Os03g59720.1 | ribosomal protein L36 containing protein, expressed		N/A		0	0	0	0	0	0	1	0	1	0	0	0	0	2	0	0	0	0
Bradi1g04240	AT5G12190.1 | RNA-binding (RRM/RBD/RNP motifs) family protein		LOC_Os03g59710.1 | RNA recognition motif containing protein, putative, expressed		N/A		0	0	0	1	0	0	0	0	0	0	0	0	1	2	1	1	1	0
Bradi1g04245	AT5G12190.1 | RNA-binding (RRM/RBD/RNP motifs) family protein		LOC_Os03g59710.1 | RNA recognition motif containing protein, putative, expressed		N/A		0	1	0	0	0	0	0	0	1	0	0	0	4	0	1	2	0	0
Bradi1g04250	AT2G38730.1 | Cyclophilin-like peptidyl-prolyl cis-trans isomerase family protein		LOC_Os03g59700.1 | peptidyl-prolyl cis-trans isomerase, putative, expressed		N/A		0	2	2	0	0	1	0	0	0	0	0	0	1	0	1	4	0	0
Bradi1g04261	AT5G06990.1 | Protein of unknown function, DUF617		LOC_Os03g59690.1 | DUF617 domain containing protein, expressed		N/A		0	1	0	0	0	0	0	0	1	0	0	0	2	0	1	1	0	0
Bradi1g04270	AT2G47350.1 | HIT zinc finger ;PAPA-1-like conserved region		LOC_Os03g59680.1 | PAPA-1-like conserved region family protein, expressed		N/A		0	0	0	0	0	0	1	0	1	0	0	0	4	1	0	0	1	0
Bradi1g04280	AT2G41130.1 | basic helix-loop-helix (bHLH) DNA-binding superfamily protein		LOC_Os03g59670.1 | basic helix-loop-helix, putative, expressed		bHLH		0	1	1	0	0	0	0	1	1	0	0	0	1	1	1	1	0	0
Bradi1g04286	No hits found		LOC_Os07g02890.1 | OsFBX209 - F-box domain containing protein, expressed		N/A		2	0	0	1	0	0	0	0	0	0	0	0	2	2	0	0	0	0
Bradi1g04287	No hits found		No hits found		N/A		0	0	0	0	0	0	0	0	0	0	0	0	0	0	0	0	0	0
Bradi1g04288	AT1G46984.1 | F-box family protein		LOC_Os07g02890.1 | OsFBX209 - F-box domain containing protein, expressed		N/A		0	1	0	0	0	0	0	0	0	0	0	0	0	0	1	4	1	0
Bradi1g04290	No hits found		No hits found		N/A		0	1	1	0	0	0	0	0	1	0	0	0	1	0	1	7	0	0
Bradi1g04292	No hits found		LOC_Os03g59650.2 | BRCA1 C Terminus domain containing protein, expressed,LOC_Os03g59650.3 | BRCA1 C Terminus domain containing protein, expressed		N/A		0	0	0	0	0	0	0	0	0	0	0	0	1	0	0	0	0	0
Bradi1g04300	AT1G08520.1 | ALBINA 1		LOC_Os03g59640.1 | magnesium-chelatase subunit chlD, chloroplast precursor, putative, expressed		N/A		0	0	0	0	0	0	0	0	0	1	0	0	1	2	1	1	0	0
Bradi1g04305	No hits found		No hits found		N/A		0	0	0	1	0	0	0	0	1	0	0	0	0	0	1	11	0	0
Bradi1g04310	AT5G04040.1 | Patatin-like phospholipase family protein		LOC_Os03g59620.1 | phospholipase, patatin family, putative, expressed		N/A		0	2	1	0	0	0	0	1	0	0	0	0	0	0	1	2	0	0
Bradi1g04320	AT1G52340.1 | NAD(P)-binding Rossmann-fold superfamily protein		LOC_Os03g59610.1 | oxidoreductase, short chain dehydrogenase/reductase family protein, putative, expressed		N/A		0	1	0	0	0	0	0	0	2	0	0	0	0	0	0	0	0	0
Bradi1g04330	AT5G27540.1 | MIRO-related GTP-ase 1		LOC_Os03g59590.1 | ATP/GTP/Ca++ binding protein, putative, expressed		N/A		0	1	0	2	0	1	0	0	1	0	0	0	1	0	0	0	1	0
Bradi1g04337	AT2G41870.1 | Remorin family protein		LOC_Os03g59360.1 | remorin, putative, expressed		N/A		0	0	0	0	0	0	1	0	1	0	0	0	2	0	1	2	0	1
Bradi1g04348	No hits found		LOC_Os01g66670.1 | expressed protein		N/A		0	0	0	1	0	1	0	0	2	0	0	0	0	2	0	0	0	0
Bradi1g04359	No hits found		No hits found		N/A		0	0	0	0	0	0	0	0	1	0	0	0	0	0	0	0	0	0
Bradi1g04370	AT4G38700.1 | Disease resistance-responsive (dirigent-like protein) family protein		LOC_Os03g59440.1 | dirigent, putative, expressed		N/A		0	0	0	0	0	0	0	1	1	0	0	0	0	0	1	1	0	0
Bradi1g04390	No hits found		LOC_Os01g66670.1 | expressed protein		N/A		0	1	1	0	1	0	0	0	1	0	0	0	1	1	1	1	2	0
Bradi1g04397	AT1G18370.1 | ATP binding microtubule motor family protein		LOC_Os01g33040.1 | kinesin motor domain containing protein, expressed		N/A		0	0	0	0	0	0	0	0	1	0	0	0	1	0	1	3	1	1
Bradi1g04403	No hits found		LOC_Os03g13340.1 | expressed protein		N/A		0	0	0	1	1	0	0	0	0	0	0	0	1	0	1	1	0	0
Bradi1g04410	AT2G21110.1 | Disease resistance-responsive (dirigent-like protein) family protein		LOC_Os03g59440.1 | dirigent, putative, expressed		N/A		0	0	0	1	0	1	1	0	0	0	0	0	0	3	0	0	0	0
Bradi1g04420	AT4G38700.1 | Disease resistance-responsive (dirigent-like protein) family protein		LOC_Os03g59440.1 | dirigent, putative, expressed		N/A		0	0	0	0	0	0	0	1	0	0	0	0	0	2	1	1	1	0
Bradi1g04430	AT5G59320.1 | lipid transfer protein 3		LOC_Os03g59380.1 | LTPL28 - Protease inhibitor/seed storage/LTP family protein precursor, expressed		N/A		0	1	0	0	0	2	0	0	0	0	0	0	1	0	1	5	0	1
Bradi1g04440	AT5G12480.1 | calmodulin-domain protein kinase 7		LOC_Os03g59390.1 | CAMK_CAMK_like.24 - CAMK includes calcium/calmodulin depedent protein kinases, expressed		N/A		1	1	0	0	1	1	1	0	0	0	0	0	0	0	1	2	0	0
Bradi1g04450	No hits found		LOC_Os07g10120.1 | expressed protein		N/A		0	0	0	0	0	0	0	0	3	0	0	0	0	1	1	2	0	0
Bradi1g04460	AT3G12400.1 | Ubiquitin-conjugating enzyme/RWD-like protein		LOC_Os02g58640.1 | tumor susceptibility gene 101, putative, expressed		N/A		0	0	0	0	0	1	1	0	1	0	0	0	0	2	1	2	2	0
Bradi1g04470	AT2G21110.1 | Disease resistance-responsive (dirigent-like protein) family protein		LOC_Os03g59440.1 | dirigent, putative, expressed		N/A		0	0	0	0	0	0	0	0	0	0	0	0	2	0	1	3	1	0
Bradi1g04477	AT3G22660.1 | rRNA processing protein-related		LOC_Os07g29320.1 | rRNA-processing protein EBP2, putative, expressed		N/A		0	1	1	1	0	0	0	0	0	0	0	0	0	1	0	0	0	0
Bradi1g04490	No hits found		LOC_Os01g66670.1 | expressed protein		N/A		0	0	0	0	0	0	0	0	2	0	0	0	0	0	0	0	1	0
Bradi1g04500	AT4G36790.1 | Major facilitator superfamily protein		LOC_Os03g59450.1 | transporter-related, putative, expressed		N/A		0	0	0	0	0	0	0	0	4	0	0	0	1	0	0	0	0	0
Bradi1g04503	No hits found		LOC_Os01g66670.1 | expressed protein		N/A		1	1	0	0	0	0	0	0	2	0	0	0	1	1	1	2	1	0
Bradi1g04506	No hits found		LOC_Os12g20280.1 | expressed protein		N/A		0	1	0	1	0	1	1	1	1	0	0	0	0	0	1	2	1	1
Bradi1g04510	AT2G35530.1 | basic region/leucine zipper transcription factor 16,AT4G36730.2 | G-box binding factor 1		LOC_Os07g10890.1 | transcription factor, putative, expressed,LOC_Os03g59460.1 | transcription factor, putative, expressed		bZIP		0	0	0	0	2	0	3	0	3	0	0	0	0	0	1	5	0	0
Bradi1g04520	AT4G16580.1 | Protein phosphatase 2C family protein		LOC_Os03g59470.1 | stage II sporulation protein E, putative, expressed		N/A		1	0	0	0	0	0	0	0	0	0	0	0	1	1	0	0	0	0
Bradi1g04527	AT1G75150.1 |		LOC_Os03g59480.1 | expressed protein		N/A		0	2	0	1	0	0	0	0	1	0	0	0	0	0	0	0	0	0
Bradi1g04540	AT5G19280.1 | kinase associated protein phosphatase		LOC_Os03g59530.1 | protein Kinase-associated protein phosphatase, putative, expressed		N/A		0	0	0	0	0	1	0	0	2	0	0	0	0	0	1	1	0	0
Bradi1g04550	AT3G05250.1 | RING/U-box superfamily protein		LOC_Os03g59540.1 | zinc finger, C3HC4 type domain containing protein, expressed		N/A		0	0	0	0	0	0	0	1	0	0	0	0	1	0	1	3	0	0
Bradi1g04561	AT1G51510.1 | RNA-binding (RRM/RBD/RNP motifs) family protein		LOC_Os03g59550.1 | RNA recognition motif containing protein, putative, expressed		N/A		0	0	0	0	0	0	0	0	0	0	0	0	0	0	1	2	0	0
Bradi1g04570	AT1G03360.1 | ribosomal RNA processing 4		LOC_Os04g43922.1 | exosome complex exonuclease rrp4, putative, expressed		N/A		0	0	0	0	0	0	0	0	1	0	0	0	1	0	1	2	0	0
Bradi1g04580	AT5G19040.1 | isopentenyltransferase 5		LOC_Os03g59570.1 | IPP transferase, putative, expressed		N/A		0	0	0	0	1	0	1	0	1	0	0	0	0	1	0	0	1	0
Bradi1g04590	AT3G12600.1 | nudix hydrolase homolog 16		LOC_Os03g59580.1 | hydrolase, NUDIX family, domain containing protein, expressed		N/A		0	0	0	1	0	2	1	1	2	0	0	0	2	1	0	0	0	0
Bradi1g04597	AT5G05170.1 | Cellulose synthase family protein		LOC_Os03g59340.1 | CESA2 - cellulose synthase, expressed		N/A		0	0	0	0	1	1	0	0	1	0	0	0	0	1	1	1	0	0
Bradi1g04603	No hits found		No hits found		N/A		0	0	0	0	0	0	0	0	0	0	0	0	0	2	0	0	0	0
Bradi1g04610	AT3G57510.1 | Pectin lyase-like superfamily protein		LOC_Os07g10740.1 | polygalacturonase, putative, expressed		N/A		0	1	0	0	0	0	0	2	0	0	0	0	0	0	1	2	0	0
Bradi1g04620	AT5G19855.1 | Chaperonin-like RbcX protein		LOC_Os03g59320.1 | expressed protein		N/A		0	0	0	1	0	2	1	0	1	0	0	0	2	1	1	4	0	0
Bradi1g04625	ATMG00220.1 | apocytochrome b		No hits found		N/A		0	0	0	1	1	1	0	0	1	0	0	0	0	0	1	1	1	1
Bradi1g04630	AT3G57510.1 | Pectin lyase-like superfamily protein		LOC_Os07g10740.1 | polygalacturonase, putative, expressed		N/A		0	0	0	0	0	2	1	0	0	0	0	0	2	0	1	7	0	1
Bradi1g04641	AT3G57510.1 | Pectin lyase-like superfamily protein		LOC_Os07g10740.1 | polygalacturonase, putative, expressed		N/A		0	1	0	0	0	1	0	0	1	0	0	0	0	0	1	3	3	0
Bradi1g04650	No hits found		LOC_Os02g57910.1 | OsFBX73 - F-box domain containing protein, expressed		N/A		0	1	0	1	0	0	0	0	0	0	0	0	0	0	1	1	0	0
Bradi1g04660	AT3G57490.1 | Ribosomal protein S5 family protein		LOC_Os03g59310.1 | ribosomal protein, putative, expressed		N/A		0	1	0	2	0	1	0	0	1	0	0	0	0	0	0	0	0	0
Bradi1g04670	AT3G08030.1 | Protein of unknown function, DUF642		LOC_Os03g59300.1 | expressed protein		N/A		0	0	0	1	0	2	1	0	1	0	0	0	1	1	1	6	1	0
Bradi1g04677	AT5G49610.1 | F-box family protein		LOC_Os01g28150.1 | OsFBX6 - F-box domain containing protein, expressed		N/A		0	1	0	1	0	0	1	0	0	0	0	0	2	1	1	1	0	0
Bradi1g04679	No hits found		No hits found		N/A		0	0	0	1	0	0	0	0	1	0	0	0	0	0	1	6	0	0
Bradi1g04681	No hits found		No hits found		N/A		0	0	0	1	0	0	0	0	1	0	0	1	3	0	1	1	0	0
Bradi1g04683	No hits found		LOC_Os01g67280.1 | expressed protein		N/A		0	1	0	0	0	1	0	0	1	0	0	0	0	0	1	1	3	0
Bradi1g04690	AT5G26330.1 | Cupredoxin superfamily protein		LOC_Os03g59280.1 | plastocyanin-like domain containing protein, putative, expressed		N/A		0	0	0	0	1	0	1	0	1	0	0	0	0	1	1	2	0	2
Bradi1g04700	AT1G03130.1 | photosystem I subunit D-2		LOC_Os08g44680.1 | photosystem I reaction center subunit II, chloroplast precursor, putative, expressed		N/A		0	1	1	0	0	1	0	0	0	0	0	0	0	0	0	0	1	0
Bradi1g04710	AT1G55340.1 | Protein of unknown function (DUF1639)		LOC_Os03g59250.1 | expressed protein		N/A		0	0	0	0	0	0	0	0	1	0	0	0	1	0	0	0	1	0
Bradi1g04720	AT1G55360.1 | Protein of Unknown Function (DUF239)		LOC_Os07g10530.1 | carboxyl-terminal peptidase, putative, expressed		N/A		0	0	0	1	0	0	0	0	1	0	0	0	0	0	0	0	0	0
Bradi1g04730	No hits found		LOC_Os03g59225.1 | expressed protein		N/A		0	0	0	0	0	0	0	0	0	0	0	0	0	2	0	0	0	0
Bradi1g04740	AT5G25450.1 | Cytochrome bd ubiquinol oxidase, 14kDa subunit		LOC_Os03g59220.1 | cytochrome b-c1 complex subunit 7, putative, expressed		N/A		0	0	0	1	0	0	0	0	1	0	0	0	2	0	0	0	0	0
Bradi1g04750	No hits found		LOC_Os03g59210.1 | expressed protein		N/A		0	0	0	1	0	0	0	0	0	0	0	0	0	1	0	0	1	0
Bradi1g04760	AT5G28150.1 | Plant protein of unknown function (DUF868)		LOC_Os03g59200.1 | expressed protein		N/A		0	0	0	0	0	0	0	0	0	0	0	0	0	0	1	1	2	0
Bradi1g04772	AT3G09510.1 | Ribonuclease H-like superfamily protein		LOC_Os06g09530.1 | expressed protein		N/A		1	0	0	0	0	0	0	0	0	0	0	0	0	0	1	3	0	0
Bradi1g04780	AT5G18130.1 |		LOC_Os03g59180.1 | expressed protein		N/A		0	0	0	0	0	0	1	0	0	0	0	0	0	5	0	0	4	0
Bradi1g04790	AT3G03860.1 | APR-like 5		LOC_Os03g59170.1 | OsAPRL5 adenosine 5\'-phosphosulfate reductase-like OsAPRL5, expressed		N/A		0	0	0	0	1	2	0	0	1	0	0	0	1	0	1	5	0	0
Bradi1g04800	AT4G26310.1 | elongation factor P (EF-P) family protein		LOC_Os03g59160.1 | elongation factor P, putative, expressed		N/A		0	0	0	0	1	0	0	0	4	0	0	0	0	0	1	3	0	0
Bradi1g04810	AT4G25650.1 | ACD1-like		LOC_Os03g59110.1 | pheophorbide a oxygenase, chloroplast precursor, putative, expressed		N/A		0	0	0	0	0	0	0	0	0	0	0	0	0	0	1	1	0	0
Bradi1g04820	AT1G52600.1 | Peptidase S24/S26A/S26B/S26C family protein		LOC_Os05g23260.1 | OsSigP4 - Putative Type I Signal Peptidase homologue; employs a putative Ser/His catalytic dyad, expressed		N/A		0	0	0	0	0	0	0	0	2	0	1	0	0	0	1	1	0	0
Bradi1g04830	AT1G55320.1 | acyl-activating enzyme 18		LOC_Os03g59080.1 | AMP-binding enzyme, putative, expressed		N/A		0	0	0	0	0	0	0	0	4	0	0	0	0	0	1	7	1	0
Bradi1g04835	AT3G25270.1 | Ribonuclease H-like superfamily protein		LOC_Os01g60820.1 | hypothetical protein		N/A		0	0	0	0	0	0	0	0	0	0	0	0	0	0	0	0	0	0
Bradi1g04840	AT3G58490.1 | Phosphatidic acid phosphatase (PAP2) family protein		LOC_Os03g59070.1 | phosphatase, putative, expressed		N/A		0	0	0	0	0	0	0	0	1	0	0	0	0	2	0	0	1	0
Bradi1g04850	AT3G58500.1 | protein phosphatase 2A-4		LOC_Os03g59060.1 | OsPP2Ac-2 - Phosphatase 2A isoform 2 belonging to family 2, expressed		N/A		0	1	0	4	0	0	0	0	0	0	0	0	1	0	1	1	1	0
Bradi1g04860	AT2G42520.1 | P-loop containing nucleoside triphosphate hydrolases superfamily protein		LOC_Os03g59050.1 | DEAD-box ATP-dependent RNA helicase, putative, expressed		N/A		0	0	0	0	1	0	0	0	1	0	0	0	0	0	1	6	0	0
Bradi1g04870	AT4G34640.1 | squalene synthase 1		LOC_Os03g59040.2 | squalene synthetase, putative, expressed,LOC_Os03g59040.1 | squalene synthetase, putative, expressed		N/A		0	0	0	0	2	0	1	1	3	0	0	0	0	0	1	1	0	0
Bradi1g04880	AT5G49690.1 | UDP-Glycosyltransferase superfamily protein		LOC_Os03g59030.1 | UDP-rhamnose rhamnosyltransferase, putative, expressed		N/A		0	0	0	0	0	0	0	0	4	0	0	0	0	1	0	0	0	0
Bradi1g04890	AT5G65550.1 | UDP-Glycosyltransferase superfamily protein		LOC_Os03g59030.1 | UDP-rhamnose rhamnosyltransferase, putative, expressed		N/A		0	0	0	0	2	0	2	0	1	0	0	0	2	0	1	2	1	0
Bradi1g04900	AT4G34640.1 | squalene synthase 1		LOC_Os03g59040.1 | squalene synthetase, putative, expressed,LOC_Os03g59040.2 | squalene synthetase, putative, expressed		N/A		0	1	1	1	0	0	0	0	1	0	0	0	2	1	1	1	0	0
Bradi1g04903	AT5G49690.1 | UDP-Glycosyltransferase superfamily protein		LOC_Os03g59030.1 | UDP-rhamnose rhamnosyltransferase, putative, expressed		N/A		0	0	0	0	0	2	0	2	1	0	0	0	1	0	1	2	0	0
Bradi1g04907	AT1G02335.1 | germin-like protein subfamily 2 member 2 precursor		LOC_Os03g58980.1 | Cupin domain containing protein, expressed		N/A		0	0	0	1	1	0	0	0	0	0	0	0	1	0	1	1	2	0
Bradi1g04917	AT5G49830.1 | exocyst complex component 84B		LOC_Os07g10110.1 | expressed protein		N/A		0	0	0	0	0	1	0	2	1	0	0	0	0	0	0	0	1	0
Bradi1g04930	AT2G44290.1 | Bifunctional inhibitor/lipid-transfer protein/seed storage 2S albumin superfamily protein		LOC_Os03g58940.1 | LTPL83 - Protease inhibitor/seed storage/LTP family protein precursor, putative, expressed		N/A		0	0	0	2	0	1	0	0	0	0	0	0	0	0	1	2	1	2
Bradi1g04935	No hits found		No hits found		N/A		0	1	0	2	0	1	1	0	0	0	0	0	0	1	0	0	2	0
Bradi1g04940	AT1G20890.1 |		LOC_Os03g58930.1 | expressed protein		N/A		0	1	0	0	0	0	0	0	1	0	0	0	2	0	1	2	0	0
Bradi1g04950	AT2G44120.2 | Ribosomal protein L30/L7 family protein		LOC_Os04g51630.1 | 60S ribosomal protein L7, putative, expressed,LOC_Os04g51630.2 | 60S ribosomal protein L7, putative, expressed		N/A		0	0	0	0	0	0	0	0	0	0	0	0	3	1	1	2	1	0
Bradi1g04953	No hits found		LOC_Os09g39310.1 | expressed protein		N/A		0	0	0	0	0	1	0	0	1	0	0	0	0	1	0	0	0	0
Bradi1g04957	AT5G62620.1 | Galactosyltransferase family protein		LOC_Os03g58920.2 | galactosyltransferase family protein, putative, expressed		N/A		0	0	0	0	1	0	0	0	0	0	0	0	0	0	1	3	0	0
Bradi1g04963	No hits found		LOC_Os09g39310.1 | expressed protein		N/A		0	1	0	1	0	0	0	0	1	0	0	0	1	1	0	0	0	1
Bradi1g04970	No hits found		LOC_Os09g38170.1 | expressed protein		N/A		2	0	0	0	0	0	0	0	0	0	0	0	0	0	1	2	0	0
Bradi1g04975	No hits found		No hits found		N/A		0	0	0	0	0	0	0	1	0	0	0	0	0	0	1	1	0	0
Bradi1g04980	AT4G13750.1 | Histidine kinase-, DNA gyrase B-, and HSP90-like ATPase family protein		LOC_Os03g58910.2 | expressed protein		N/A		0	0	0	2	0	0	0	3	0	0	0	0	0	1	0	0	0	0
Bradi1g04990	AT5G62620.1 | Galactosyltransferase family protein		LOC_Os03g58900.1 | galactosyltransferase family protein, putative, expressed		N/A		0	1	0	0	1	0	0	0	2	1	0	0	2	0	1	7	1	0
Bradi1g05000	AT3G28480.1 | Oxoglutarate/iron-dependent oxygenase		LOC_Os03g58890.2 | oxidoreductase, putative, expressed		N/A		0	0	0	1	0	1	1	0	0	0	0	0	0	1	1	2	0	0
Bradi1g05010	AT1G69970.2 | CLAVATA3/ESR-RELATED 26		LOC_Os07g09625.1 | expressed protein		N/A		0	0	0	1	0	0	0	0	0	0	0	0	0	0	0	0	1	0
Bradi1g05020	No hits found		LOC_Os03g58850.1 | uncharacterized PE-PGRS family protein PE_PGRS3 precursor, putative, expressed		N/A		0	0	0	1	0	0	0	0	0	0	0	0	2	0	0	0	0	0
Bradi1g05030	AT1G04760.1 | vesicle-associated membrane protein 726,AT2G32670.1 | vesicle-associated membrane protein 725		LOC_Os03g58840.1 | vesicle-associated membrane protein, putative, expressed		N/A		0	0	0	5	0	0	1	0	0	0	0	0	1	0	1	1	0	0
Bradi1g05037	AT1G59640.1 | BIG PETAL P,AT1G59640.2 | BIG PETAL P		LOC_Os03g58830.1 | BEE 1, putative, expressed		bHLH		0	0	0	0	0	1	0	1	0	0	2	0	3	1	1	2	1	0
Bradi1g05050	AT4G22340.3 | cytidinediphosphate diacylglycerol synthase 2		LOC_Os01g55360.3 | phosphatidate cytidylyltransferase, putative, expressed		N/A		0	0	0	0	0	0	0	0	0	0	0	0	0	0	0	0	0	0
Bradi1g05056	AT1G18950.1 | DDT domain superfamily		LOC_Os07g09580.1 | aminoacyl-tRNA synthetase, putative, expressed		N/A		0	0	0	0	0	1	0	0	0	0	0	0	1	1	1	4	1	0
Bradi1g05062	AT3G18600.1 | P-loop containing nucleoside triphosphate hydrolases superfamily protein		LOC_Os03g58810.1 | DEAD-box ATP-dependent RNA helicase, putative, expressed		N/A		0	0	0	0	0	0	0	0	1	0	1	0	0	0	1	1	0	0
Bradi1g05070	AT5G65540.1 |		LOC_Os03g58780.1 | expressed protein		N/A		0	0	0	0	0	0	0	0	3	0	0	0	0	0	0	0	0	0
Bradi1g05080	No hits found		LOC_Os03g58764.1 | OsFBDUF18 - F-box and DUF domain containing protein, expressed		N/A		1	0	0	2	0	0	0	0	1	0	0	0	0	0	1	2	1	0
Bradi1g05090	AT1G69910.1 | Protein kinase superfamily protein		LOC_Os03g58750.1 | protein kinase domain containing protein, expressed		N/A		0	0	0	1	0	1	0	0	1	0	0	0	1	0	0	0	1	0
Bradi1g05100	AT3G28630.2 | Protein of unknown function (DUF569)		LOC_Os03g58740.1 | expressed protein		N/A		0	2	1	0	1	0	0	1	0	0	0	0	1	1	1	1	0	1
Bradi1g05110	AT2G21440.1 | RNA-binding (RRM/RBD/RNP motifs) family protein		LOC_Os03g58720.1 | RNA recognition motif containing protein, putative, expressed		N/A		0	0	0	1	0	2	1	0	2	0	0	0	0	1	0	0	1	0
Bradi1g05116	AT5G23330.1 | Nucleotidylyl transferase superfamily protein		LOC_Os03g58710.2 | riboflavin biosynthesis protein-related, putative, expressed,LOC_Os03g58710.1 | riboflavin biosynthesis protein-related, putative, expressed		N/A		0	0	0	4	0	0	0	1	0	0	0	0	2	0	0	0	0	0
Bradi1g05122	AT1G75850.1 | VPS35 homolog B		LOC_Os03g58700.1 | vacuolar protein sorting-associated protein 35, putative, expressed		N/A		1	0	0	0	0	1	0	0	1	0	0	0	1	0	1	7	0	0
Bradi1g05130	AT3G54350.2 | Forkhead-associated (FHA) domain-containing protein		LOC_Os03g58640.1 | FHA domain containing protein, putative, expressed		N/A		0	0	0	0	1	0	0	0	0	0	0	0	0	0	1	3	0	0
Bradi1g05141	AT5G39950.1 | thioredoxin 2		LOC_Os03g58630.1 | thioredoxin, putative, expressed		N/A		0	0	0	1	0	1	0	0	0	0	0	0	1	3	0	0	0	0
Bradi1g05150	AT5G39950.1 | thioredoxin 2		LOC_Os03g58630.1 | thioredoxin, putative, expressed		N/A		1	3	1	0	0	0	0	0	0	0	0	0	0	0	1	1	0	0
Bradi1g05156	AT2G02590.1 |		LOC_Os03g58620.1 | small multi-drug export protein, putative, expressed		N/A		0	0	0	0	0	0	0	0	0	0	0	0	0	0	0	0	1	0
Bradi1g05162	AT1G48410.1 | Stabilizer of iron transporter SufD / Polynucleotidyl transferase		LOC_Os03g58600.1 | PAZ domain containing protein, putative, expressed		N/A		1	0	0	0	0	0	0	0	0	0	0	0	1	0	1	20	0	0
Bradi1g05170	AT1G03910.1 |		LOC_Os03g58590.1 | expressed protein		N/A		0	0	0	0	0	1	0	0	0	0	0	0	3	0	0	0	0	0
Bradi1g05180	AT2G39210.1 | Major facilitator superfamily protein		LOC_Os03g58580.1 | nodulin, putative, expressed		N/A		0	0	0	0	1	0	1	0	0	0	0	0	0	0	0	0	1	0
Bradi1g05190	AT3G52190.1 | phosphate transporter traffic facilitator1		LOC_Os07g09000.1 | WD domain, G-beta repeat domain containing protein, expressed		N/A		0	0	0	1	0	1	0	0	0	0	0	0	0	1	1	1	0	0
Bradi1g05192	AT4G17505.1 | Protein of Unknown Function (DUF239)		LOC_Os12g29370.1 | ZmEBE-1 protein, putative, expressed		N/A		0	0	0	0	0	0	0	0	0	0	0	0	0	1	1	3	1	0
Bradi1g05195	AT5G18460.1 | Protein of Unknown Function (DUF239)		LOC_Os12g29370.1 | ZmEBE-1 protein, putative, expressed		N/A		0	1	1	0	0	0	0	0	0	0	0	0	0	3	1	1	0	0
Bradi1g05198	No hits found		LOC_Os12g14350.1 | transposon protein, putative, CACTA, En/Spm sub-class		N/A		0	0	0	0	1	0	1	0	1	0	0	0	0	1	1	3	0	1
Bradi1g05202	No hits found		LOC_Os01g20150.1 | transposon protein, putative, CACTA, En/Spm sub-class, expressed		N/A		1	3	0	0	0	0	0	1	1	0	0	0	0	0	0	0	0	0
Bradi1g05206	No hits found		No hits found		N/A		0	0	0	1	0	0	0	1	0	0	0	0	0	1	0	0	0	0
Bradi1g05208	No hits found		LOC_Os06g46440.1 | expressed protein		N/A		0	0	0	1	0	1	1	0	12	0	0	0	0	0	0	0	0	0
Bradi1g05210	AT2G34630.1 | geranyl diphosphate synthase 1		LOC_Os06g46450.1 | polyprenyl synthetase, putative, expressed		N/A		1	0	0	0	0	3	0	0	0	0	0	0	0	0	1	6	0	0
Bradi1g05217	No hits found		LOC_Os07g49050.1 | expressed protein		N/A		0	1	0	0	0	0	1	0	0	0	0	0	0	1	1	4	0	0
Bradi1g05230	No hits found		LOC_Os12g42930.1 | expressed protein		N/A		1	0	0	0	0	0	0	0	1	0	0	0	0	1	1	5	0	0
Bradi1g05240	AT5G18570.1 | GTP1/OBG family protein		LOC_Os03g58540.1 | spo0B-associated GTP-binding protein, putative, expressed		N/A		0	0	0	0	0	0	1	0	0	0	0	0	0	0	1	1	0	0
Bradi1g05247	AT4G22140.1 | PHD finger family protein / bromo-adjacent homology (BAH) domain-containing protein		LOC_Os07g08880.1 | ES43 protein, putative, expressed		N/A		0	1	0	0	2	0	1	2	2	0	0	0	0	1	1	1	0	0
Bradi1g05260	AT3G51040.2 | RTE1-homolog		LOC_Os03g58520.1 | green ripe-like, putative, expressed		N/A		1	1	0	0	0	0	0	0	0	0	0	0	0	0	0	0	1	0
Bradi1g05270	AT3G57450.1 |		LOC_Os10g28160.1 | expressed protein		N/A		0	1	0	0	0	1	0	0	0	0	0	0	0	0	1	1	0	0
Bradi1g05276	No hits found		LOC_Os01g32640.1 | OsFBX9 - F-box domain containing protein, expressed		N/A		0	0	0	0	0	0	0	0	1	0	0	0	0	0	1	1	0	0
Bradi1g05290	AT3G57450.1 |		LOC_Os10g28160.1 | expressed protein		N/A		0	0	0	0	0	0	0	0	0	0	0	0	0	0	1	2	0	0
Bradi1g05296	No hits found		LOC_Os05g05500.1 | OsFBX159 - F-box domain containing protein, expressed		N/A		1	0	0	1	2	0	1	0	1	0	0	0	1	0	0	0	0	1
Bradi1g05301	No hits found		LOC_Os03g58500.1 | expressed protein		N/A		0	2	0	0	0	2	0	0	0	1	0	0	0	0	1	8	0	3
Bradi1g05306	AT3G20070.1 | titan9		LOC_Os06g13640.1 | expressed protein		N/A		0	0	0	2	1	2	0	0	0	0	0	0	0	1	1	2	0	1
Bradi1g05310	AT1G08800.1 | Protein of unknown function, DUF593		LOC_Os03g58490.1 | DUF593 domain containing protein, expressed,LOC_Os03g58490.2 | DUF593 domain containing protein, expressed		N/A		0	0	0	0	1	0	0	0	0	0	0	0	0	1	0	0	0	0
Bradi1g05320	AT3G23090.1 | TPX2 (targeting protein for Xklp2) protein family		LOC_Os03g58480.1 | seed specific protein Bn15D14A, putative, expressed		N/A		0	1	0	1	1	0	1	0	1	1	0	0	0	2	0	0	0	0
Bradi1g05322	No hits found		No hits found		N/A		0	0	0	0	0	0	0	0	0	0	0	0	1	0	0	0	1	0
Bradi1g05325	No hits found		LOC_Os10g04020.1 | OsFBX356 - F-box domain containing protein, expressed		N/A		0	2	1	0	1	1	0	0	2	0	0	0	0	1	1	2	1	0
Bradi1g05328	AT5G36228.1 | nucleic acid binding;zinc ion binding		LOC_Os07g23494.1 | expressed protein		N/A		0	0	0	0	0	0	0	1	1	0	0	0	0	0	1	4	0	0
Bradi1g05330	AT2G30620.1 | winged-helix DNA-binding transcription factor family protein		LOC_Os07g08710.1 | AT hook-containing DNA-binding protein, putative, expressed		N/A		0	0	0	0	0	0	0	0	0	0	0	0	2	1	1	8	1	0
Bradi1g05340	AT5G09500.1 | Ribosomal protein S19 family protein		LOC_Os07g08660.1 | 40S ribosomal protein S15, putative, expressed		N/A		0	1	1	0	0	1	0	0	0	0	0	0	1	1	0	0	0	0
Bradi1g05346	AT3G04670.1 | WRKY DNA-binding protein 39,AT3G04670.2 | WRKY DNA-binding protein 39		LOC_Os03g58420.2 | WRKY6, expressed,LOC_Os03g58420.1 | WRKY6, expressed		WRKY		0	0	0	1	0	0	0	0	1	0	0	0	0	2	0	0	0	0
Bradi1g05360	AT2G16860.1 | GCIP-interacting family protein		LOC_Os06g49740.1 | pre-mRNA-splicing factor syf2, putative, expressed		N/A		0	0	0	1	0	0	0	0	4	0	0	0	0	3	0	0	0	0
Bradi1g05371	AT1G08770.1 | prenylated RAB acceptor 1.E		LOC_Os03g58410.1 | prenylated rab acceptor, putative, expressed		N/A		0	2	2	0	0	0	0	1	1	0	0	0	1	0	0	0	0	0
Bradi1g05380	AT5G49160.1 | methyltransferase 1		LOC_Os03g58400.1 | C-5 cytosine-specific DNA methylase, putative, expressed		N/A		0	0	0	0	0	1	1	0	0	0	0	0	0	0	1	1	0	0
Bradi1g05390	AT2G30580.1 | DREB2A-interacting protein 2		LOC_Os03g58390.1 | zinc finger, C3HC4 type domain containing protein, expressed		N/A		0	0	0	1	0	0	0	0	0	0	0	0	0	0	1	1	0	1
Bradi1g05397	AT3G06190.1 | BTB-POZ and MATH domain 2		LOC_Os08g13000.1 | MBTB20 - Bric-a-Brac, Tramtrack, Broad Complex BTB domain with Meprin and TRAF Homology MATH domain, expressed		N/A		0	0	0	3	1	2	0	0	0	0	0	0	0	0	0	0	0	0
Bradi1g05410	AT1G04240.1 | AUX/IAA transcriptional regulator family protein		LOC_Os03g58350.1 | OsIAA14 - Auxin-responsive Aux/IAA gene family member, expressed		N/A		0	1	0	1	1	0	0	0	0	0	0	0	1	0	1	11	1	1
Bradi1g05420	AT1G04230.1 | Protein of unknown function (DUF2361),AT5G43720.1 | Protein of unknown function (DUF2361)		LOC_Os03g58340.1 | expressed protein		N/A		0	0	0	0	0	0	0	0	0	0	0	0	0	0	0	0	1	0
Bradi1g05430	AT4G02590.1 | basic helix-loop-helix (bHLH) DNA-binding superfamily protein,AT4G02590.2 | basic helix-loop-helix (bHLH) DNA-binding superfamily protein		LOC_Os03g58330.1 | BHLH transcription factor, putative, expressed		bHLH		0	0	0	0	0	0	0	0	1	0	0	0	2	1	1	3	1	0
Bradi1g05450	AT4G02610.1 | Aldolase-type TIM barrel family protein		LOC_Os03g58300.1 | indole-3-glycerol phosphate lyase, chloroplast precursor, putative, expressed		N/A		1	0	0	1	0	0	0	1	1	0	0	0	0	0	1	7	0	0
Bradi1g05460	AT4G02610.1 | Aldolase-type TIM barrel family protein		LOC_Os03g58290.1 | indole-3-glycerol phosphate lyase, chloroplast precursor, putative, expressed		N/A		1	0	0	0	0	0	1	0	2	0	0	0	0	0	1	4	1	0
Bradi1g05467	AT4G02610.1 | Aldolase-type TIM barrel family protein		LOC_Os03g58260.2 | indole-3-glycerol phosphate lyase, chloroplast precursor, putative, expressed		N/A		1	0	0	1	0	0	0	0	1	0	0	0	1	1	1	1	1	0
Bradi1g05480	AT5G28770.2 | bZIP transcription factor family protein		LOC_Os03g58250.1 | bZIP transcription factor domain containing protein, expressed		bZIP		0	0	0	0	1	1	0	3	0	0	0	0	1	1	1	1	0	1
Bradi1g05490	AT2G38840.1 | Guanylate-binding family protein		LOC_Os03g58240.1 | GTP binding protein, putative, expressed		N/A		0	1	0	2	0	0	0	0	1	0	0	0	0	1	1	2	0	0
Bradi1g05500	AT4G14620.1 | Protein of unknown function (DUF506)		LOC_Os03g58230.1 | plant-specific domain TIGR01615 family protein, expressed		N/A		0	2	0	0	0	1	0	0	0	0	0	0	0	0	1	3	0	0
Bradi1g05510	AT3G09630.1 | Ribosomal protein L4/L1 family		LOC_Os03g58204.1 | ribosomal protein L4, putative, expressed		N/A		0	1	0	1	0	0	0	0	1	0	0	0	1	0	1	1	0	0
Bradi1g05520	AT5G20030.1 | Plant Tudor-like RNA-binding protein		LOC_Os03g58190.1 | expressed protein		N/A		0	0	0	0	0	0	0	0	0	0	0	0	0	0	0	0	0	0
Bradi1g05530	No hits found		LOC_Os03g58180.1 | basic proline-rich protein precursor, putative, expressed		N/A		0	0	0	0	3	0	2	0	2	0	0	0	1	0	1	4	1	0
Bradi1g05535	No hits found		No hits found		N/A		0	0	0	1	1	2	0	0	0	0	0	0	0	0	0	0	0	0
Bradi1g05540	AT3G22850.1 | Aluminium induced protein with YGL and LRDR motifs		LOC_Os03g58170.1 | stem-specific protein TSJT1, putative, expressed		N/A		1	0	0	0	0	0	0	0	0	0	0	0	0	0	1	2	1	0
Bradi1g05550	AT3G22830.1 | heat shock transcription factor A6B		LOC_Os03g58160.1 | heat stress transcription factor, putative, expressed		HSF		1	1	0	1	1	0	1	0	3	0	0	1	1	0	1	2	0	0
Bradi1g05560	AT3G63310.1 | Bax inhibitor-1 family protein		LOC_Os03g58150.1 | transmembrane BAX inhibitor motif-containing protein, putative, expressed		N/A		0	0	0	0	1	0	1	0	1	0	0	0	1	0	1	8	0	0
Bradi1g05570	AT1G03070.2 | Bax inhibitor-1 family protein		LOC_Os03g58140.1 | transmembrane BAX inhibitor motif-containing protein, putative, expressed		N/A		0	1	0	0	0	0	0	1	1	0	0	0	0	2	0	0	1	0
Bradi1g05580	AT3G04780.1 | Protein of unknown function (DUF1000)		LOC_Os03g58130.1 | thioredoxin, putative, expressed		N/A		0	0	0	1	1	1	0	0	0	0	0	0	1	0	1	1	0	0
Bradi1g05585	AT1G16820.1 | vacuolar ATP synthase catalytic subunit-related / V-ATPase-related / vacuolar proton pump-related		LOC_Os07g46680.1 | expressed protein		N/A		0	0	0	0	1	1	0	0	1	0	0	0	0	0	0	0	0	0
Bradi1g05590	AT5G64320.1 | Pentatricopeptide repeat (PPR) superfamily protein		LOC_Os03g58120.1 | PPR repeat domain containing protein, putative, expressed		N/A		0	0	0	0	0	0	0	0	2	0	0	0	0	1	1	4	2	0
Bradi1g05600	AT4G13340.1 | Leucine-rich repeat (LRR) family protein		LOC_Os03g58110.1 | uncharacterized protein At4g06744 precursor, putative, expressed		N/A		0	0	0	0	0	0	0	0	1	0	0	0	1	1	0	0	0	0
Bradi1g05610	AT2G02980.1 | Pentatricopeptide repeat (PPR) superfamily protein		LOC_Os03g58100.1 | pentatricopeptide, putative, expressed		N/A		0	0	0	1	0	0	0	3	1	0	0	0	0	1	0	0	0	0
Bradi1g05620	AT3G13480.1 |		LOC_Os03g58090.1 | expressed protein		N/A		0	0	0	0	2	1	0	0	3	0	0	0	2	1	0	0	0	1
Bradi1g05630	AT2G32040.1 | Major facilitator superfamily protein		LOC_Os03g58080.1 | BT1 family protein, putative, expressed		N/A		0	0	0	1	0	0	0	0	1	0	0	0	0	0	0	0	1	0
Bradi1g05640	AT5G03610.1 | GDSL-like Lipase/Acylhydrolase superfamily protein		LOC_Os04g55660.1 | GDSL-like lipase/acylhydrolase, putative, expressed		N/A		0	0	0	0	0	0	0	0	1	0	0	0	0	0	1	1	0	0
Bradi1g05650	AT3G22440.1 | FRIGIDA-like protein		LOC_Os03g58070.1 | frigida, putative, expressed		N/A		0	0	0	1	0	1	0	3	0	0	0	0	0	0	1	3	0	0
Bradi1g05655	No hits found		No hits found		N/A		0	0	0	0	0	0	0	0	0	0	0	0	0	0	1	22	0	0
Bradi1g05660	AT1G54490.1 | exoribonuclease 4		LOC_Os03g58060.1 | XRN 5\'-3\' exonuclease N-terminus domain containing protein, expressed		N/A		0	0	0	1	0	1	0	1	1	0	0	0	0	0	0	0	0	0
Bradi1g05670	AT1G34030.1 | Ribosomal protein S13/S18 family		LOC_Os07g07709.1 | ribosomal protein S13p/S18e, putative, expressed		N/A		0	0	0	0	0	0	0	1	0	0	0	0	0	0	0	0	0	0
Bradi1g05680	AT5G18170.1 | glutamate dehydrogenase 1		LOC_Os03g58040.3 | glutamate dehydrogenase protein, putative, expressed,LOC_Os03g58040.2 | glutamate dehydrogenase protein, putative, expressed		N/A		0	0	0	1	0	0	0	0	0	0	0	0	0	1	0	0	1	1
Bradi1g05690	AT2G32020.1 | Acyl-CoA N-acyltransferases (NAT) superfamily protein		LOC_Os03g58010.1 | acetyltransferase, GNAT family, putative, expressed		N/A		0	1	0	0	0	0	1	0	0	0	0	0	1	0	1	12	0	0
Bradi1g05700	AT2G32030.1 | Acyl-CoA N-acyltransferases (NAT) superfamily protein		LOC_Os03g58020.1 | acetyltransferase, GNAT family, putative, expressed		N/A		0	0	0	0	0	0	0	0	0	0	0	0	0	1	0	0	0	0
Bradi1g05707	ATCG01010.1 | NADH-Ubiquinone oxidoreductase (complex I), chain 5 protein		LOC_Os10g21418.1 | NADPH-dependent oxidoreductase, putative, expressed		N/A		0	0	0	1	0	0	0	0	1	0	0	0	0	1	0	0	0	0
Bradi1g05715	ATCG00900.1 | Ribosomal protein S7p/S5e family protein		LOC_Os04g16886.1 | chloroplast 30S ribosomal protein S7, putative, expressed		N/A		0	1	0	0	0	1	0	0	0	0	0	0	0	2	0	0	0	0
Bradi1g05721	ATCG01250.1 | NADH-Ubiquinone/plastoquinone (complex I) protein		LOC_Os04g16854.1 | NADPH-dependent oxidoreductase, putative, expressed		N/A		0	0	0	1	0	0	0	1	0	0	0	0	1	0	1	1	0	0
Bradi1g05724	No hits found		No hits found		N/A		0	0	0	0	0	0	0	0	0	0	0	0	0	0	0	0	1	0
Bradi1g05728	ATCG00170.1 | DNA-directed RNA polymerase family protein		LOC_Os04g16830.1 | DNA-directed RNA polymerase subunit beta, putative, expressed		N/A		0	0	0	0	0	0	0	0	0	1	0	0	2	1	0	0	0	0
Bradi1g05731	ATCG00720.1 | photosynthetic electron transfer B		LOC_Os10g21324.1 | cytochrome b6, putative, expressed		N/A		0	0	0	0	0	0	0	0	0	0	0	0	0	0	0	0	0	0
Bradi1g05735	ATCG00710.1 | photosystem II reaction center protein H		LOC_Os08g15296.1 | photosystem II reaction center protein H, putative, expressed		N/A		0	1	1	0	0	0	0	0	2	1	0	0	1	0	0	0	1	0
Bradi1g05738	No hits found		No hits found		N/A		0	0	0	0	0	0	0	0	0	0	0	0	0	0	1	1	0	0
Bradi1g05739	ATCG00690.1 | photosystem II reaction center protein T		No hits found		N/A		0	0	0	0	0	0	0	0	0	0	0	0	0	0	0	0	0	0
Bradi1g05740	ATCG00680.1 | photosystem II reaction center protein B		LOC_Os06g39708.1 | photosystem II P680 chlorophyll A apoprotein, putative, expressed		N/A		0	0	0	1	0	0	0	0	1	0	0	0	0	0	1	1	0	0
Bradi1g05741	ATCG00670.1 | plastid-encoded CLP P		LOC_Os06g39712.1 | OsClp10 - Putative Clp protease homologue, expressed		N/A		0	0	0	0	0	0	0	0	0	0	0	0	0	1	0	0	0	0
Bradi1g05742	ATCG00660.1 | ribosomal protein L20		LOC_Os08g15306.1 | chloroplast 50S ribosomal protein L20, putative, expressed		N/A		0	0	0	0	0	0	0	0	0	0	0	0	0	0	0	0	0	0
Bradi1g05743	ATCG00650.1 | ribosomal protein S18		LOC_Os08g15308.1 | chloroplast 30S ribosomal protein S18, putative, expressed		N/A		0	0	0	0	0	0	0	0	1	1	0	0	1	0	0	0	1	0
Bradi1g05746	ATCG00640.1 | ribosomal protein L33		LOC_Os08g15312.1 | chloroplast 50S ribosomal protein L33, putative, expressed		N/A		0	0	0	0	0	0	0	0	0	0	0	0	0	0	1	1	0	0
Bradi1g05747	ATCG01060.1 | iron-sulfur cluster binding;electron carriers;4 iron, 4 sulfur cluster binding		LOC_Os06g46436.1 | photosystem I iron-sulfur center, putative, expressed		N/A		0	0	0	0	0	0	0	2	0	1	0	0	0	0	0	0	0	0
Bradi1g05748	ATCG01070.1 | NADH-ubiquinone/plastoquinone oxidoreductase chain 4L		LOC_Os10g21404.1 | NADPH-dependent oxidoreductase, putative		N/A		0	0	0	0	0	0	0	0	0	0	0	0	0	0	1	1	0	0
Bradi1g05749	ATCG01080.1 | NADH:ubiquinone/plastoquinone oxidoreductase, chain 6		LOC_Os02g24574.1 | NADPH-dependent oxidoreductase, putative		N/A		0	0	0	0	0	0	0	1	0	1	0	0	1	0	1	2	0	0
Bradi1g05750	ATCG01090.1 | NADPH dehydrogenases		LOC_Os10g21398.1 | NADPH-dependent oxidoreductase, putative, expressed		N/A		0	0	0	0	0	0	0	0	1	1	0	0	1	0	0	0	1	0
Bradi1g05752	ATCG00730.1 | photosynthetic electron transfer D		LOC_Os08g15292.1 | cytochrome b6-f complex subunit 4, putative, expressed		N/A		0	0	0	0	0	0	0	0	0	0	0	0	0	1	0	0	0	0
Bradi1g05753	ATCG00720.1 | photosynthetic electron transfer B		LOC_Os01g57942.1 | cytochrome b6, putative, expressed		N/A		0	0	0	0	0	0	0	0	0	0	0	0	0	0	1	1	0	0
Bradi1g05755	ATCG00630.1 | PSAJ		No hits found		N/A		0	0	0	0	0	0	0	0	0	0	0	0	1	1	0	0	0	0
Bradi1g05756	ATCG00590.1 | electron carriers		No hits found		N/A		0	0	0	0	0	0	0	1	0	1	0	0	0	0	0	0	0	0
Bradi1g05757	No hits found		No hits found		N/A		0	0	0	0	0	0	0	0	0	0	0	0	0	0	1	1	0	0
Bradi1g05758	ATCG00580.1 | photosystem II reaction center protein E		LOC_Os10g21298.1 | cytochrome b559 subunit alpha, putative		N/A		0	0	0	1	0	1	0	0	0	0	0	0	0	0	1	1	1	0
Bradi1g05760	ATCG00540.1 | photosynthetic electron transfer A		LOC_Os01g65902.1 | apocytochrome f precursor, putative, expressed		N/A		0	0	0	0	0	0	0	1	0	1	0	0	2	0	0	0	0	0
Bradi1g05761	ATCG00530.1 | CemA-like proton extrusion protein-related		LOC_Os02g24598.1 | chloroplast envelope membrane protein, putative, expressed		N/A		0	1	0	0	0	0	0	0	0	1	0	0	0	0	1	1	0	0
Bradi1g05762	ATCG00170.1 | DNA-directed RNA polymerase family protein		LOC_Os05g05860.1 | retrotransposon protein, putative, unclassified, expressed		N/A		0	0	0	0	0	0	0	0	1	0	0	0	3	0	0	0	0	0
Bradi1g05763	ATCG00160.1 | ribosomal protein S2		LOC_Os02g24612.1 | ribosomal protein S2, putative, expressed		N/A		0	1	0	0	0	0	0	1	0	1	0	0	0	0	1	1	0	0
Bradi1g05764	ATCG00150.1 | ATPase, F0 complex, subunit A protein		LOC_Os10g38276.1 | chloroplast ATP synthase a chain precursor, putative, expressed		N/A		0	0	0	0	0	0	0	0	0	0	0	0	0	0	0	0	0	0
Bradi1g05765	ATCG01310.1 | ribosomal protein L2		No hits found		N/A		0	1	0	0	1	1	0	0	1	0	0	0	0	2	0	0	0	0
Bradi1g05766	ATCG01310.1 | ribosomal protein L2		LOC_Os12g38000.1 | 60S ribosomal protein L8, putative, expressed		N/A		0	0	0	1	1	1	0	0	0	0	0	0	0	0	1	1	1	0
Bradi1g05767	ATCG00820.1 | ribosomal protein S19		LOC_Os07g25024.1 | chloroplast 30S ribosomal protein S19, putative		N/A		0	1	0	0	0	1	0	0	0	0	0	0	0	0	1	1	0	0
Bradi1g05768	ATCG00810.1 | ribosomal protein L22		LOC_Os04g16822.1 | chloroplast 50S ribosomal protein L22, putative, expressed		N/A		0	0	0	0	0	0	0	0	0	0	0	0	0	1	0	0	0	0
Bradi1g05769	ATCG00800.1 | structural constituent of ribosome		LOC_Os09g24416.1 | chloroplast 30S ribosomal protein S3, putative, expressed		N/A		0	0	0	0	0	0	0	2	0	0	0	0	0	1	0	0	0	0
Bradi1g05772	AT3G60790.1 | F-box family protein		LOC_Os01g46500.1 | OsFBX21 - F-box domain containing protein, expressed		N/A		0	0	0	0	0	0	0	2	0	0	0	0	0	1	0	0	0	0
Bradi1g05774	No hits found		LOC_Os01g46470.1 | expressed protein		N/A		0	0	0	0	0	0	0	0	0	0	0	0	3	1	0	0	0	0
Bradi1g05775	AT2G32030.1 | Acyl-CoA N-acyltransferases (NAT) superfamily protein		LOC_Os03g58020.1 | acetyltransferase, GNAT family, putative, expressed		N/A		0	0	0	0	0	0	0	1	0	0	0	0	0	1	0	0	0	0
Bradi1g05776	AT2G32030.1 | Acyl-CoA N-acyltransferases (NAT) superfamily protein		LOC_Os03g58010.1 | acetyltransferase, GNAT family, putative, expressed		N/A		0	0	0	0	0	0	0	2	0	0	0	0	0	1	0	0	0	0
Bradi1g05777	AT2G48130.1 | Bifunctional inhibitor/lipid-transfer protein/seed storage 2S albumin superfamily protein		LOC_Os03g57990.1 | LTPL74 - Protease inhibitor/seed storage/LTP family protein precursor, expressed		N/A		0	0	0	0	0	0	0	0	0	0	0	0	1	0	0	0	0	0
Bradi1g05778	AT2G48140.1 | Bifunctional inhibitor/lipid-transfer protein/seed storage 2S albumin superfamily protein		LOC_Os03g57980.1 | LTPL99 - Protease inhibitor/seed storage/LTP family protein precursor, expressed		N/A		0	0	0	0	0	1	0	0	0	0	0	0	0	0	1	1	0	0
Bradi1g05779	AT3G22600.1 | Bifunctional inhibitor/lipid-transfer protein/seed storage 2S albumin superfamily protein		LOC_Os03g57970.1 | LTPL73 - Protease inhibitor/seed storage/LTP family protein precursor, expressed		N/A		0	0	0	0	0	0	0	0	0	0	0	0	1	0	0	0	0	0
Bradi1g05781	AT1G76680.1 | 12-oxophytodienoate reductase 1		LOC_Os06g11240.1 | 12-oxophytodienoate reductase, putative, expressed		N/A		0	0	0	1	0	0	0	0	0	0	0	0	0	0	0	0	0	0
Bradi1g05782	AT1G76680.1 | 12-oxophytodienoate reductase 1		LOC_Os06g11210.1 | 12-oxophytodienoate reductase, putative, expressed		N/A		0	0	0	0	1	0	1	1	1	0	0	0	0	0	1	2	0	0
Bradi1g05783	AT1G76680.1 | 12-oxophytodienoate reductase 1		LOC_Os06g11210.1 | 12-oxophytodienoate reductase, putative, expressed		N/A		0	0	0	0	0	0	0	0	0	0	0	0	1	0	0	0	1	0
Bradi1g05784	No hits found		No hits found		N/A		0	0	0	0	1	0	1	1	1	0	0	0	0	1	1	1	1	0
Bradi1g05785	AT2G19130.1 | S-locus lectin protein kinase family protein		LOC_Os04g01310.1 | serine/threonine-protein kinase receptor precursor, putative, expressed		N/A		0	0	0	0	0	0	0	0	0	0	0	0	0	1	0	0	0	0
Bradi1g05786	AT4G03460.1 | Ankyrin repeat family protein		LOC_Os09g16160.1 | ankyrin repeat family protein, putative, expressed		N/A		0	0	0	0	0	0	0	0	0	0	0	0	1	1	1	1	0	0
Bradi1g05788	AT3G22630.1 | 20S proteasome beta subunit D1		LOC_Os03g48930.1 | peptidase, T1 family, putative, expressed		N/A		0	0	0	0	0	0	0	0	1	0	0	0	1	0	0	0	0	0
Bradi1g05789	AT3G22640.1 | cupin family protein		LOC_Os03g57960.1 | cupin domain containing protein, expressed		N/A		0	0	0	0	0	0	0	0	0	0	0	0	0	0	0	0	0	0
Bradi1g05790	AT2G32010.2 | CVP2 like 1		LOC_Os03g57950.1 | type I inositol-1,4,5-trisphosphate 5-phosphatase, putative, expressed		N/A		0	0	0	0	0	0	0	1	1	0	0	0	0	0	0	0	0	0
Bradi1g05791	AT3G03940.1 | Protein kinase family protein		LOC_Os03g57940.2 | CK1_CaseinKinase_1a.4 - CK1 includes the casein kinase 1 kinases, expressed		N/A		0	0	0	0	0	0	0	1	0	0	0	0	1	0	0	0	0	0
Bradi1g05792	AT3G22640.1 | cupin family protein		LOC_Os03g57960.1 | cupin domain containing protein, expressed		N/A		0	0	0	0	1	0	1	1	1	0	0	0	0	1	1	1	1	0
Bradi1g05793	AT3G03940.1 | Protein kinase family protein		LOC_Os03g57940.1 | CK1_CaseinKinase_1a.4 - CK1 includes the casein kinase 1 kinases, expressed		N/A		0	1	0	0	0	0	0	0	0	0	0	0	1	0	1	2	0	0
Bradi1g05794	AT3G49030.1 | FBD, F-box and Leucine Rich Repeat domains containing protein		LOC_Os01g46500.2 | OsFBX21 - F-box domain containing protein, expressed		N/A		0	0	0	0	0	1	0	0	0	0	0	0	0	0	1	1	0	0
Bradi1g05795	AT3G13460.1 | evolutionarily conserved C-terminal region 2,AT5G61020.1 | evolutionarily conserved C-terminal region 3		LOC_Os07g07490.1 | YT521-B, putative, expressed		N/A		0	1	0	0	0	0	0	0	0	1	0	0	0	0	1	2	0	0
Bradi1g05796	AT3G53730.1 | Histone superfamily protein		LOC_Os05g38740.1 | Core histone H2A/H2B/H3/H4 domain containing protein, putative, expressed		N/A		0	0	0	0	0	1	0	0	0	0	0	0	0	0	0	0	0	0
Bradi1g05797	No hits found		LOC_Os03g57930.1 | expressed protein		N/A		0	0	0	0	0	0	0	0	0	0	0	0	0	0	0	0	1	0
Bradi1g05799	No hits found		No hits found		N/A		0	0	0	1	0	0	0	1	0	0	0	0	1	0	1	1	0	0
Bradi1g05801	AT5G26330.1 | Cupredoxin superfamily protein		LOC_Os03g57730.1 | uclacyanin-2 precursor, putative, expressed		N/A		0	1	0	1	0	0	0	0	0	0	0	0	0	2	0	0	0	0
Bradi1g05804	No hits found		No hits found		N/A		0	0	0	0	0	0	0	0	0	0	0	0	1	1	0	0	0	0
Bradi1g05805	AT1G12440.1 | A20/AN1-like zinc finger family protein		LOC_Os03g57900.1 | zinc finger A20 and AN1 domain-containing stress-associated protein, putative, expressed		N/A		0	0	0	0	0	0	0	1	0	0	0	0	0	2	0	0	0	0
Bradi1g05807	AT2G32300.1 | uclacyanin 1		LOC_Os03g57740.1 | plastocyanin-like domain containing protein, putative, expressed		N/A		0	0	0	0	0	0	0	0	0	0	0	0	0	0	0	0	0	0
Bradi1g05808	AT2G32300.1 | uclacyanin 1		LOC_Os03g57740.1 | plastocyanin-like domain containing protein, putative, expressed		N/A		0	0	0	0	0	0	0	1	1	0	0	0	0	2	1	1	2	0
Bradi1g05810	AT3G14680.1 | cytochrome P450, family 72, subfamily A, polypeptide 14		LOC_Os01g43740.1 | cytochrome P450 72A1, putative, expressed		N/A		1	0	0	0	0	0	0	1	0	0	0	0	1	0	1	2	0	0
Bradi1g05811	AT2G36320.1 | A20/AN1-like zinc finger family protein		LOC_Os03g57890.1 | zinc finger A20 and AN1 domain-containing stress-associated protein, putative, expressed		N/A		0	0	0	0	0	0	0	0	1	0	0	0	1	0	1	12	1	0
Bradi1g05813	No hits found		No hits found		N/A		0	2	1	0	0	0	1	0	0	0	0	0	0	0	1	14	0	0
Bradi1g05817	AT1G64760.2 | O-Glycosyl hydrolases family 17 protein		LOC_Os03g57880.1 | glucan endo-1,3-beta-glucosidase precursor, putative, expressed		N/A		0	0	0	0	1	0	0	0	0	0	0	0	0	2	1	3	0	0
Bradi1g05827	AT5G27740.1 | ATPase family associated with various cellular activities (AAA)		LOC_Os03g57870.1 | RFC3 - Putative clamp loader of PCNA, replication factor C subunit 3, expressed		N/A		0	0	0	0	0	0	0	0	0	0	0	0	1	1	0	0	0	0
Bradi1g05837	AT3G03740.1 | BTB-POZ and MATH domain 4		LOC_Os03g57854.1 | MBTB3 - Bric-a-Brac, Tramtrack, Broad Complex BTB domain with Meprin and TRAF Homology MATH domain, expressed,LOC_Os03g57854.2 | MBTB3 - Bric-a-Brac, Tramtrack, Broad Complex BTB domain with Meprin and TRAF Homology MATH domain, expressed		N/A		0	0	0	1	1	1	0	1	0	0	0	0	1	0	1	7	0	0
Bradi1g05850	AT5G35220.1 | Peptidase M50 family protein		LOC_Os03g57840.1 | peptidase M50, mammalian sterol-regulatory element binding protein, putative, expressed		N/A		0	0	0	0	0	0	0	0	1	0	0	0	0	1	0	0	0	0
Bradi1g05860	AT2G02760.1 | ubiquiting-conjugating enzyme 2		LOC_Os07g07240.2 | ubiquitin-conjugating enzyme, putative, expressed		N/A		0	0	0	0	0	0	1	0	2	0	0	0	0	0	0	0	0	0
Bradi1g05870	AT2G07696.1 | Ribosomal protein S7p/S5e family protein		LOC_Os12g34045.1 | mitochondrial ribosomal protein S7, putative, expressed		N/A		0	0	0	0	0	0	0	1	0	0	0	0	1	1	0	0	0	1
Bradi1g05880	AT3G03770.1 | Leucine-rich repeat protein kinase family protein,AT3G03770.2 | Leucine-rich repeat protein kinase family protein		LOC_Os03g57780.1 | protein kinase, putative, expressed		N/A		0	2	1	3	1	1	1	0	1	0	0	0	1	0	0	0	0	0
Bradi1g05885	AT1G11890.1 | Synaptobrevin family protein		LOC_Os03g57760.2 | 25.3 kDa vesicle transport protein, putative, expressed,LOC_Os06g09850.1 | 25.3 kDa vesicle transport protein, putative, expressed		N/A		0	2	0	2	0	0	0	0	1	0	0	0	0	0	0	0	0	0
Bradi1g05890	No hits found		LOC_Os03g57750.1 | expressed protein		N/A		0	0	0	1	0	0	0	0	0	0	0	0	1	1	0	0	0	0
Bradi1g05895	AT2G32300.1 | uclacyanin 1		LOC_Os03g57740.1 | plastocyanin-like domain containing protein, putative, expressed		N/A		0	1	1	0	0	0	0	0	1	0	0	0	0	2	0	0	0	0
Bradi1g05900	AT2G32300.1 | uclacyanin 1		LOC_Os03g57740.1 | plastocyanin-like domain containing protein, putative, expressed		N/A		1	1	1	1	0	1	1	0	1	0	0	0	0	1	1	4	0	0
Bradi1g05910	AT4G22820.2 | A20/AN1-like zinc finger family protein		LOC_Os03g57900.1 | zinc finger A20 and AN1 domain-containing stress-associated protein, putative, expressed		N/A		0	1	0	1	1	0	1	0	2	0	0	0	0	0	1	4	0	0
Bradi1g05920	AT3G43600.1 | aldehyde oxidase 2,AT5G20960.1 | aldehyde oxidase 1		LOC_Os03g57690.1 | aldehyde oxidase, putative, expressed		N/A		0	0	0	0	0	0	0	0	1	0	0	1	2	0	0	0	1	0
Bradi1g05930	AT1G04580.1 | aldehyde oxidase 4		LOC_Os03g57690.1 | aldehyde oxidase, putative, expressed		N/A		0	1	0	0	0	0	0	0	0	0	0	0	0	0	1	5	0	0
Bradi1g05941	AT3G43600.1 | aldehyde oxidase 2,AT5G20960.1 | aldehyde oxidase 1		LOC_Os03g57690.1 | aldehyde oxidase, putative, expressed		N/A		0	1	0	0	0	2	0	0	1	0	0	0	1	1	1	3	0	1
Bradi1g05950	AT2G27580.2 | A20/AN1-like zinc finger family protein		LOC_Os03g57900.1 | zinc finger A20 and AN1 domain-containing stress-associated protein, putative, expressed		N/A		0	0	0	1	0	0	0	0	0	1	0	0	1	0	1	2	0	0
Bradi1g05960	AT3G43600.1 | aldehyde oxidase 2,AT5G20960.2 | aldehyde oxidase 1		LOC_Os03g57690.1 | aldehyde oxidase, putative, expressed		N/A		0	0	0	0	1	1	0	0	0	0	0	0	0	3	0	0	0	0
Bradi1g05970	AT3G12630.1 | A20/AN1-like zinc finger family protein		LOC_Os03g57920.1 | AN1-like zinc finger domain containing protein, expressed		N/A		0	0	0	0	0	1	0	0	1	0	1	0	0	1	1	1	1	0
Bradi1g05980	AT3G55280.1 | ribosomal protein L23AB		LOC_Os01g24690.1 | 60S ribosomal protein L23A, putative, expressed		N/A		0	2	1	0	0	0	0	0	1	0	0	0	1	1	1	3	0	0
Bradi1g05983	No hits found		No hits found		N/A		1	0	0	0	0	0	1	0	5	0	0	0	0	0	1	9	0	0
Bradi1g05987	AT3G26660.1 | LOB domain-containing protein 24		LOC_Os03g57670.1 | DUF260 domain containing protein, putative, expressed		N/A		0	2	1	3	1	0	0	0	0	0	0	0	2	1	1	1	0	1
Bradi1g05990	AT3G54720.1 | Peptidase M28 family protein		LOC_Os03g57660.1 | peptidase, putative, expressed		N/A		0	0	0	0	0	0	0	0	0	0	0	0	0	1	1	7	0	0
Bradi1g05996	AT3G47680.1 | DNA binding		LOC_Os02g54440.1 | transposon protein, putative, Pong sub-class, expressed		N/A		0	0	0	0	0	0	1	0	2	0	0	0	0	0	1	2	0	0
Bradi1g06002	AT5G06570.2 | alpha/beta-Hydrolases superfamily protein		LOC_Os03g57640.1 | gibberellin receptor GID1L2, putative, expressed		N/A		0	1	0	0	1	0	0	0	0	0	0	0	0	0	1	6	0	0
Bradi1g06010	AT5G06560.1 | Protein of unknown function, DUF593		LOC_Os03g57530.1 | DUF593 domain containing protein, expressed		N/A		0	1	1	0	0	3	1	1	0	0	0	0	0	1	1	3	0	0
Bradi1g06020	AT1G68450.1 | VQ motif-containing protein		LOC_Os03g57520.1 | VQ domain containing protein, putative, expressed		N/A		0	0	0	0	0	0	0	0	0	0	0	0	0	0	0	0	0	1
Bradi1g06030	AT2G38910.1 | calcium-dependent protein kinase 20		LOC_Os03g57510.1 | CAMK_CAMK_like.23 - CAMK includes calcium/calmodulin depedent protein kinases, expressed		N/A		0	0	0	2	0	0	0	0	2	0	0	0	1	0	1	1	0	0
Bradi1g06036	AT2G19130.1 | S-locus lectin protein kinase family protein		LOC_Os04g34290.1 | protein kinase, putative, expressed		N/A		0	0	0	1	0	0	1	0	0	0	0	0	0	0	1	1	0	0
Bradi1g06042	AT2G35860.1 | FASCICLIN-like arabinogalactan protein 16 precursor		LOC_Os03g57460.1 | fasciclin domain containing protein, expressed		N/A		0	1	0	0	0	0	0	0	0	0	0	0	0	0	1	2	0	0
Bradi1g06050	AT3G10660.1 | calmodulin-domain protein kinase cdpk isoform 2		LOC_Os03g57450.1 | CAMK_CAMK_like.2 - CAMK includes calcium/calmodulin depedent protein kinases, expressed		N/A		0	2	1	0	1	0	1	0	1	0	0	0	0	0	1	9	0	0
Bradi1g06060	AT3G10650.1 |		LOC_Os03g57430.1 | expressed protein		N/A		0	0	0	0	1	1	1	0	1	0	0	0	0	0	1	3	0	0
Bradi1g06070	AT3G10650.1 |		LOC_Os03g57425.1 | expressed protein		N/A		0	0	0	0	0	0	0	2	0	0	0	0	1	0	0	0	1	0
Bradi1g06080	AT3G11780.1 | MD-2-related lipid recognition domain-containing protein / ML domain-containing protein,AT3G11780.2 | MD-2-related lipid recognition domain-containing protein / ML domain-containing protein		LOC_Os03g57420.1 | ML domain protein, putative, expressed		N/A		0	0	0	0	0	0	0	0	0	0	0	0	0	0	1	1	1	1
Bradi1g06090	AT5G06490.1 | RING/U-box superfamily protein		LOC_Os03g57410.1 | RING-H2 finger protein ATL5D, putative, expressed		N/A		0	1	0	0	0	2	0	1	2	0	0	0	0	0	1	3	1	1
Bradi1g06095	AT5G22060.1 | DNAJ homologue 2		LOC_Os03g57340.1 | chaperone protein dnaJ, putative, expressed		N/A		0	0	0	1	0	0	0	0	1	0	0	0	0	0	1	6	0	1
Bradi1g06100	AT3G22190.1 | IQ-domain 5,AT3G22190.2 | IQ-domain 5		LOC_Os03g57330.1 | IQ calmodulin-binding motif domain containing protein, expressed		N/A		0	0	0	0	0	0	0	0	0	0	0	0	0	0	0	0	0	0
Bradi1g06110	AT3G44150.1 |		LOC_Os03g57320.1 | expp1 protein precursor, putative, expressed		N/A		0	1	0	0	0	0	0	0	0	0	0	0	1	1	1	2	1	0
Bradi1g06122	AT2G20450.1 | Ribosomal protein L14		LOC_Os02g40880.1 | ribosomal protein L14, putative, expressed		N/A		0	0	0	0	0	1	1	0	0	0	0	0	1	0	1	3	0	0
Bradi1g06130	AT3G11820.1 | syntaxin of plants 121		LOC_Os03g57310.1 | syntaxin, putative, expressed		N/A		0	1	0	0	0	1	0	1	2	0	0	0	0	0	1	2	0	0
Bradi1g06140	No hits found		LOC_Os12g12690.1 | transposon protein, putative, Pong sub-class, expressed		N/A		0	0	0	0	0	0	0	0	0	0	0	0	1	1	1	1	0	0
Bradi1g06150	AT5G16280.1 | Tetratricopeptide repeat (TPR)-like superfamily protein		LOC_Os03g57300.1 | expressed protein		N/A		1	0	0	0	2	2	2	0	3	0	0	0	0	0	1	2	0	0
Bradi1g06160	AT5G46210.1 | cullin4		LOC_Os03g57290.1 | cullin, putative, expressed		N/A		0	0	0	0	0	1	0	0	0	0	0	0	0	1	1	7	0	0
Bradi1g06170	AT2G39120.1 | Ubiquitin carboxyl-terminal hydrolase family protein		LOC_Os03g57270.1 | ubiquitin carboxyl-terminal hydrolase, family 1, putative, expressed		N/A		1	0	0	0	1	2	1	0	1	0	0	0	0	1	1	3	0	0
Bradi1g06177	AT3G42860.1 | zinc knuckle (CCHC-type) family protein		LOC_Os03g57260.2 | GRF zinc finger family protein, expressed		N/A		1	0	0	0	0	0	0	0	0	0	0	0	1	2	0	0	0	0
Bradi1g06190	AT3G58070.1 | C2H2 and C2HC zinc fingers superfamily protein		LOC_Os03g57240.1 | ZOS3-19 - C2H2 zinc finger protein, expressed		N/A		0	0	0	0	0	1	0	1	0	0	0	0	0	1	1	2	1	0
Bradi1g06200	No hits found		No hits found		N/A		0	1	0	0	0	0	0	0	0	0	0	0	1	0	1	1	0	0
Bradi1g06210	No hits found		LOC_Os10g03490.1 | expressed protein		N/A		1	0	0	0	1	0	1	0	2	0	0	0	0	1	1	5	0	0
Bradi1g06220	No hits found		LOC_Os10g05500.1 | OsFBX370 - F-box domain containing protein, expressed		N/A		0	0	0	0	0	0	0	0	1	0	0	0	0	0	1	1	0	0
Bradi1g06222	AT3G14415.1 | Aldolase-type TIM barrel family protein,AT3G14415.3 | Aldolase-type TIM barrel family protein		LOC_Os03g57220.1 | hydroxyacid oxidase 1, putative, expressed		N/A		1	0	0	1	1	1	0	0	1	0	1	0	1	0	1	1	0	0
Bradi1g06225	No hits found		No hits found		LBD		0	0	0	0	2	1	0	0	2	0	0	0	0	0	1	1	0	0
Bradi1g06230	AT3G07560.1 | peroxin 13		LOC_Os03g57210.1 | glycine-rich protein, putative, expressed		N/A		0	3	1	0	0	0	1	1	0	0	0	0	0	0	1	2	1	0
Bradi1g06235	No hits found		No hits found		N/A		0	1	0	0	1	0	0	0	0	1	0	0	1	0	1	5	1	0
Bradi1g06241	AT4G18390.1 | TEOSINTE BRANCHED 1, cycloidea and PCF transcription factor 2		LOC_Os03g57190.1 | TCP family transcription factor, putative, expressed		N/A		0	2	1	0	0	0	0	0	1	0	0	0	0	0	1	6	0	0
Bradi1g06250	AT5G46150.2 | LEM3 (ligand-effect modulator 3) family protein / CDC50 family protein		LOC_Os03g57170.2 | cell cycle control protein, putative, expressed,LOC_Os03g57170.1 | cell cycle control protein, putative, expressed		N/A		0	0	0	0	0	2	0	0	3	0	0	0	0	1	0	0	0	0
Bradi1g06260	AT1G17210.1 | IAP-like protein 1		LOC_Os03g57160.1 | zinc ion binding protein, putative, expressed		N/A		0	0	0	0	2	0	1	0	1	0	0	0	1	2	1	2	0	0
Bradi1g06270	AT2G34620.1 | Mitochondrial transcription termination factor family protein		LOC_Os03g57149.1 | mTERF domain containing protein, expressed		N/A		0	0	0	0	0	3	0	0	0	0	0	0	0	3	0	0	0	0
Bradi1g06280	No hits found		LOC_Os02g39384.1 | expressed protein		N/A		0	0	0	2	1	0	2	0	1	0	0	0	0	1	1	1	0	0
Bradi1g06290	No hits found		LOC_Os02g39390.1 | expressed protein		N/A		0	0	0	1	0	0	0	2	0	0	0	0	1	2	1	1	0	0
Bradi1g06300	AT2G34690.1 | Glycolipid transfer protein (GLTP) family protein		LOC_Os03g57140.1 | GLTP domain containing protein, putative, expressed		N/A		0	0	0	0	0	0	0	0	0	0	0	0	1	1	1	2	1	0
Bradi1g06310	AT2G32060.3 | Ribosomal protein L7Ae/L30e/S12e/Gadd45 family protein,AT2G32060.2 | Ribosomal protein L7Ae/L30e/S12e/Gadd45 family protein		LOC_Os07g05580.1 | ribosomal protein L7Ae, putative, expressed		N/A		0	0	0	1	0	2	0	0	1	0	0	0	0	2	0	0	1	0
Bradi1g06315	AT3G20800.1 | Cell differentiation, Rcd1-like protein		LOC_Os03g57130.1 | expressed protein		N/A		0	0	0	0	2	0	1	0	2	0	0	0	1	0	1	4	0	0
Bradi1g06320	AT4G05390.1 | root FNR 1		LOC_Os03g57120.1 | ferredoxin--NADP reductase, chloroplast precursor, putative, expressed		N/A		0	0	0	1	0	0	0	0	2	0	0	0	1	1	1	1	0	0
Bradi1g06330	No hits found		LOC_Os03g57830.1 | expressed protein		N/A		0	0	0	1	0	0	0	1	2	0	0	0	2	1	0	0	0	1
Bradi1g06340	AT3G18180.1 | Glycosyltransferase family 61 protein		LOC_Os02g22380.1 | glycosyltransferase protein, putative, expressed		N/A		1	0	0	0	1	1	0	0	1	0	0	0	0	0	1	3	0	0
Bradi1g06350	AT2G34730.1 | myosin heavy chain-related		LOC_Os03g57110.1 | expressed protein,LOC_Os03g57110.2 | expressed protein		N/A		0	0	0	1	1	1	0	1	0	0	0	0	0	0	0	0	0	0
Bradi1g06360	AT3G22290.1 | Endoplasmic reticulum vesicle transporter protein		LOC_Os03g57100.1 | endoplasmic reticulum-Golgi intermediate compartment protein 3, putative, expressed		N/A		0	0	0	1	0	0	0	1	0	0	0	0	0	1	1	1	1	0
Bradi1g06366	AT4G01510.1 | Arv1-like protein		LOC_Os03g57090.1 | arv1, putative, expressed		N/A		0	0	0	0	0	0	0	0	1	0	1	0	0	0	1	1	0	0
Bradi1g06372	No hits found		No hits found		N/A		1	1	0	1	1	0	0	0	1	0	0	0	1	0	1	3	0	0
Bradi1g06376	AT3G54950.1 | patatin-like protein 6		LOC_Os03g57080.1 | PLA IIIA/PLP7, putative, expressed		N/A		0	2	0	0	1	0	1	0	1	0	0	0	1	2	1	4	0	0
Bradi1g06380	AT1G55980.1 | FAD/NAD(P)-binding oxidoreductase family protein,AT1G56000.1 | FAD/NAD(P)-binding oxidoreductase family protein		LOC_Os03g57070.1 | amine oxidase-related, putative, expressed,LOC_Os03g57070.2 | amine oxidase-related, putative, expressed		N/A		0	0	0	0	0	1	0	0	0	0	0	0	0	0	0	0	1	0
Bradi1g06387	AT2G17380.1 | associated protein 19		LOC_Os03g57040.2 | clathrin adaptor complex small chain domain containing protein, expressed		N/A		0	2	0	0	0	0	0	0	0	0	0	0	0	0	1	4	0	0
Bradi1g06400	No hits found		LOC_Os07g48590.1 | retrotransposon protein, putative, unclassified		N/A		0	0	0	1	1	1	1	0	0	0	0	0	0	0	0	0	0	0
Bradi1g06410	AT2G35780.1 | serine carboxypeptidase-like 26		LOC_Os03g09190.1 | OsSCP11 - Putative Serine Carboxypeptidase homologue, expressed		N/A		0	0	0	0	0	0	0	0	2	0	0	0	0	0	1	2	0	0
Bradi1g06420	No hits found		No hits found		N/A		0	0	0	2	0	1	1	0	0	1	0	0	1	0	1	1	0	0
Bradi1g06421	No hits found		No hits found		N/A		0	0	0	2	0	0	1	0	0	0	0	0	0	1	1	1	0	1
Bradi1g06422	AT3G60830.1 | actin-related protein 7		LOC_Os03g56970.1 | actin, putative, expressed		N/A		0	0	0	0	0	1	0	0	0	0	0	0	2	0	0	0	0	0
Bradi1g06425	No hits found		No hits found		N/A		0	2	0	0	0	1	0	0	2	0	0	0	1	1	1	7	0	0
Bradi1g06430	AT5G14080.1 | Tetratricopeptide repeat (TPR)-like superfamily protein		LOC_Os03g56960.1 | PPR repeat domain containing protein, putative, expressed		N/A		0	0	0	1	0	0	0	1	0	0	0	0	0	0	0	0	0	0
Bradi1g06435	AT1G13570.1 | F-box/RNI-like superfamily protein		LOC_Os07g26000.1 | OsFBX235 - F-box domain containing protein, expressed		N/A		0	0	0	0	0	1	1	0	1	0	0	0	0	0	1	1	0	0
Bradi1g06440	AT3G59060.2 | phytochrome interacting factor 3-like 6		LOC_Os03g56950.1 | phytochrome-interacting factor 4, putative, expressed		N/A		0	0	0	1	0	0	0	0	1	0	0	0	0	0	1	2	0	0
Bradi1g06451	No hits found		LOC_Os04g44120.1 | collagen triple helix repeat, putative, expressed		N/A		0	0	0	0	0	0	0	0	0	0	0	0	0	0	1	2	0	0
Bradi1g06460	No hits found		LOC_Os07g04940.1 | uncharacterized PE-PGRS family protein PE_PGRS54 precursor, putative, expressed		TCP		0	0	0	0	0	0	0	1	2	0	0	0	1	0	1	1	1	0
Bradi1g06470	No hits found		LOC_Os03g56944.1 | lysine-rich arabinogalactan protein 19 precursor, putative, expressed		N/A		0	0	0	0	0	0	0	0	0	0	0	0	0	0	0	0	1	0
Bradi1g06480	No hits found		No hits found		N/A		0	1	0	0	0	0	0	0	2	0	0	0	1	0	1	1	0	0
Bradi1g06490	AT3G10260.3 | Reticulon family protein		LOC_Os03g56900.1 | reticulon domain containing protein, putative, expressed		N/A		0	0	0	1	0	0	0	1	0	0	0	0	0	0	1	1	0	0
Bradi1g06495	No hits found		LOC_Os03g56890.1 | expressed protein		N/A		0	0	0	0	0	0	0	0	1	1	0	0	0	1	1	2	0	0
Bradi1g06500	AT3G26320.1 | cytochrome P450, family 71, subfamily B, polypeptide 36		LOC_Os01g72740.1 | cytochrome P450, putative, expressed		N/A		0	0	0	1	1	0	0	0	0	0	0	0	2	0	0	0	0	0
Bradi1g06511	AT3G26330.1 | cytochrome P450, family 71, subfamily B, polypeptide 37		LOC_Os01g72740.1 | cytochrome P450, putative, expressed		N/A		0	1	1	0	0	0	0	0	0	0	0	0	0	0	1	3	0	0
Bradi1g06520	AT3G26330.1 | cytochrome P450, family 71, subfamily B, polypeptide 37		LOC_Os01g72740.1 | cytochrome P450, putative, expressed		N/A		0	0	0	0	0	0	0	1	1	0	0	0	1	1	1	1	0	0
Bradi1g06530	AT5G44520.1 | NagB/RpiA/CoA transferase-like superfamily protein		LOC_Os03g56869.1 | ribose-5-phosphate isomerase A, putative, expressed		N/A		0	0	0	2	0	0	0	0	3	0	0	0	1	0	0	0	0	0
Bradi1g06540	No hits found		No hits found		N/A		0	0	0	0	0	0	2	1	0	0	0	0	0	0	0	0	0	0
Bradi1g06550	No hits found		LOC_Os03g56860.1 | expressed protein		N/A		0	1	1	0	0	1	0	0	3	0	0	0	2	0	0	0	0	0
Bradi1g06560	AT4G21300.1 | Tetratricopeptide repeat (TPR)-like superfamily protein		LOC_Os03g56850.1 | pentatricopeptide, putative, expressed		N/A		0	0	0	1	1	1	0	0	0	0	0	0	0	0	0	0	0	0
Bradi1g06570	AT1G56050.1 | GTP-binding protein-related		LOC_Os03g56840.1 | GTP-binding protein, putative, expressed		N/A		0	0	0	0	0	0	0	0	0	0	0	0	0	1	1	4	0	0
Bradi1g06580	AT5G44450.1 | methyltransferases		LOC_Os03g56830.2 | ad-003, putative, expressed		N/A		0	2	1	0	0	1	0	0	2	0	0	0	0	0	1	5	0	0
Bradi1g06590	AT2G34770.1 | fatty acid hydroxylase 1		LOC_Os03g56820.1 | fatty acid hydroxylase, putative, expressed		N/A		0	0	0	1	0	0	0	0	1	0	0	0	0	0	0	0	0	0
Bradi1g06601	AT5G23860.2 | tubulin beta 8		LOC_Os03g56810.1 | tubulin/FtsZ domain containing protein, putative, expressed		N/A		0	1	0	1	0	3	0	1	0	0	0	0	1	1	1	1	0	0
Bradi1g06610	AT1G16350.1 | Aldolase-type TIM barrel family protein		LOC_Os03g56800.1 | CBS domain containing membrane protein, putative, expressed		N/A		0	0	0	0	0	1	1	0	0	0	0	0	0	0	1	10	0	0
Bradi1g06620	AT2G31200.1 | actin depolymerizing factor 6		LOC_Os03g56790.1 | actin-depolymerizing factor, putative, expressed		N/A		0	1	1	1	0	0	0	0	2	0	0	0	0	1	1	8	0	0
Bradi1g06630	AT1G31335.1 |		LOC_Os03g56782.1 | expressed protein		N/A		0	1	1	0	1	0	0	0	0	0	0	0	0	0	1	1	1	0
Bradi1g06633	AT3G12870.1 |		LOC_Os03g56700.1 | expressed protein		N/A		0	0	0	0	0	0	0	0	2	0	0	0	0	1	1	5	0	0
Bradi1g06636	AT1G07920.1 | GTP binding Elongation factor Tu family protein		LOC_Os03g08010.1 | elongation factor Tu, putative, expressed		N/A		0	0	0	0	0	0	0	0	1	0	0	0	0	0	1	1	0	1
Bradi1g06637	AT1G07930.1 | GTP binding Elongation factor Tu family protein		LOC_Os03g08010.1 | elongation factor Tu, putative, expressed		N/A		0	0	0	0	0	1	0	0	0	0	0	0	1	0	1	3	0	1
Bradi1g06638	AT2G02650.1 | Ribonuclease H-like superfamily protein		LOC_Os09g15410.1 | retrotransposon protein, putative, unclassified		N/A		0	0	0	0	0	1	0	1	2	1	0	0	0	0	1	2	0	0
Bradi1g06640	No hits found		No hits found		N/A		1	0	0	0	0	1	0	0	1	0	0	0	0	0	1	16	0	0
Bradi1g06645	AT1G07920.1 | GTP binding Elongation factor Tu family protein		LOC_Os03g08020.1 | elongation factor Tu, putative, expressed		N/A		2	0	0	0	1	2	0	0	1	0	0	0	1	0	1	2	0	0
Bradi1g06650	AT5G55490.1 | gamete expressed protein 1		LOC_Os09g27040.1 | GEX1, putative, expressed		N/A		0	0	0	0	0	0	0	1	1	0	0	0	1	0	1	5	0	0
Bradi1g06660	AT2G01050.1 | zinc ion binding;nucleic acid binding		LOC_Os03g30510.1 | expressed protein		N/A		0	0	0	1	0	1	0	1	0	0	0	0	4	0	0	0	0	0
Bradi1g06670	AT3G53500.2 | RNA-binding (RRM/RBD/RNP motifs) family protein with retrovirus zinc finger-like domain		LOC_Os12g38040.1 | metallothionein family protein, expressed		bHLH		0	0	0	0	0	2	0	0	0	0	0	0	3	0	1	5	0	0
Bradi1g06678	No hits found		No hits found		N/A		0	1	0	0	0	0	0	0	0	1	0	0	0	0	1	6	0	0
Bradi1g06686	AT1G31330.1 | photosystem I subunit F		LOC_Os03g56670.1 | photosystem I reaction center subunit III, chloroplast precursor, putative, expressed		N/A		0	0	0	0	0	0	0	0	0	0	0	0	1	0	0	0	0	0
Bradi1g06691	AT4G25800.1 | Calmodulin-binding protein,AT4G25800.2 | Calmodulin-binding protein		LOC_Os03g56660.2 | calmodulin binding protein, putative, expressed		N/A		0	2	0	0	0	0	0	0	1	0	0	0	2	2	0	0	0	0
Bradi1g06695	No hits found		LOC_Os02g04410.1 | expressed protein		N/A		1	3	0	0	1	0	0	0	1	0	0	0	0	0	1	3	0	0
Bradi1g06700	No hits found		No hits found		N/A		0	1	1	0	0	1	0	0	2	1	0	0	0	0	0	0	0	0
Bradi1g06710	AT4G38180.1 | FAR1-related sequence 5,AT3G06250.1 | FAR1-related sequence 7		LOC_Os03g56630.1 | transposon protein, putative, unclassified, expressed,LOC_Os04g52560.1 | transposon protein, putative, unclassified, expressed		N/A		0	0	0	0	0	0	0	1	0	0	0	0	0	0	0	0	0	0
Bradi1g06720	AT3G62660.1 | galacturonosyltransferase-like 7		LOC_Os03g56620.1 | expressed protein		N/A		0	0	0	0	2	1	1	0	0	0	0	0	1	0	0	0	0	0
Bradi1g06730	AT2G32580.1 | Protein of unknown function (DUF1068)		LOC_Os03g56610.1 | expressed protein		N/A		0	0	0	0	1	0	0	0	1	0	0	0	1	1	1	1	0	0
Bradi1g06740	AT3G57170.1 | N-acetylglucosaminyl transferase component family protein / Gpi1 family protein		LOC_Os05g22370.2 | N-acetylglucosaminyl transferase component, putative, expressed		N/A		0	1	0	0	0	0	0	1	0	0	0	0	1	0	0	0	0	1
Bradi1g06750	AT1G06660.1 |		LOC_Os03g56590.1 | expressed protein		N/A		0	0	0	0	0	0	1	2	2	0	0	0	1	0	1	5	2	0
Bradi1g06755	AT2G43000.1 | NAC domain containing protein 42		LOC_Os03g56580.1 | no apical meristem protein, putative, expressed		N/A		0	1	0	0	0	0	0	0	1	0	0	0	0	0	1	1	0	0
Bradi1g06760	AT2G35795.1 | Chaperone DnaJ-domain superfamily protein		LOC_Os03g56540.3 | heat shock protein DnaJ, putative, expressed		N/A		0	0	0	0	1	0	1	0	0	0	0	0	2	0	1	1	0	0
Bradi1g06766	No hits found		LOC_Os03g56500.1 | expressed protein		N/A		0	2	2	0	1	0	0	0	0	0	0	0	0	0	1	22	0	0
Bradi1g06772	AT5G21970.1 | Ubiquitin carboxyl-terminal hydrolase family protein		LOC_Os11g34160.1 | ubiquitin carboxyl-terminal hydrolase, family 1, putative, expressed		N/A		0	1	1	0	1	1	0	0	4	0	0	0	0	0	1	22	0	0
Bradi1g06780	No hits found		No hits found		N/A		0	0	0	0	1	0	0	0	0	0	0	0	1	0	0	0	0	0
Bradi1g06790	No hits found		No hits found		N/A		0	0	0	0	0	0	0	0	0	0	0	0	0	0	0	0	0	0
Bradi1g06800	No hits found		No hits found		N/A		0	1	0	0	1	0	0	0	1	0	0	0	0	0	1	2	0	0
Bradi1g06810	AT2G18470.1 | roline-rich extensin-like receptor kinase 4,AT4G34440.1 | Protein kinase superfamily protein		LOC_Os03g56470.1 | protein kinase family protein, putative, expressed		N/A		0	0	0	2	0	0	0	1	0	0	0	0	2	2	0	0	0	0
Bradi1g06821	AT5G66760.1 | succinate dehydrogenase 1-1		LOC_Os07g04240.1 | succinate dehydrogenase flavoprotein subunit,mitochondrial precursor, putative, expressed		N/A		0	0	0	0	1	1	0	0	2	0	0	0	1	0	1	5	0	0
Bradi1g06830	No hits found		LOC_Os03g56450.1 | OsFBX111 - F-box domain containing protein, expressed		N/A		0	2	1	0	1	0	0	1	0	0	0	0	0	0	1	2	0	0
Bradi1g06840	AT5G49810.1 | methionine S-methyltransferase		LOC_Os05g01470.2 | methionine S-methyltransferase, putative, expressed		N/A		0	1	0	2	0	0	0	2	0	0	0	0	1	1	1	1	0	0
Bradi1g06851	No hits found		LOC_Os03g56450.1 | OsFBX111 - F-box domain containing protein, expressed		N/A		0	1	1	0	1	0	0	0	1	0	0	0	0	1	1	1	2	0
Bradi1g06861	AT5G47550.1 | Cystatin/monellin superfamily protein		LOC_Os03g31510.1 | cysteine proteinase inhibitor 8 precursor, putative, expressed		N/A		0	0	0	1	0	0	0	0	0	0	0	0	0	0	1	1	0	0
Bradi1g06864	AT5G42710.1 |		LOC_Os03g56430.1 | expressed protein		N/A		0	0	0	0	0	0	0	1	1	0	0	0	0	1	0	0	0	0
Bradi1g06867	AT1G19400.1 | Erythronate-4-phosphate dehydrogenase family protein		LOC_Os03g56420.1 | expressed protein		N/A		0	1	0	1	1	0	0	1	0	0	0	0	0	2	0	0	0	0
Bradi1g06870	AT3G50845.1 | Protein of unknown function (DUF59)		LOC_Os03g56410.2 | expressed protein		N/A		0	0	0	2	0	0	0	0	0	0	0	0	2	0	1	3	0	0
Bradi1g06880	AT2G22070.1 | pentatricopeptide (PPR) repeat-containing protein		LOC_Os03g56400.1 | pentatricopeptide, putative, expressed		N/A		0	1	0	0	0	0	0	1	0	0	0	0	0	1	1	1	0	0
Bradi1g06882	AT1G19430.1 | S-adenosyl-L-methionine-dependent methyltransferases superfamily protein,AT1G75200.1 | flavodoxin family protein / radical SAM domain-containing protein		LOC_Os03g56380.1 | methyltransferase, putative, expressed		N/A		0	0	0	0	0	0	0	2	0	0	0	0	0	0	1	3	0	0
Bradi1g06884	AT5G42760.1 | Leucine carboxyl methyltransferase		LOC_Os03g56370.1 | methyltransferase, putative, expressed		N/A		0	0	0	1	0	1	0	0	1	0	0	0	1	1	0	0	0	0
Bradi1g06887	No hits found		LOC_Os03g56450.1 | OsFBX111 - F-box domain containing protein, expressed		N/A		0	3	1	0	0	0	1	0	3	0	0	0	0	1	1	11	0	0
Bradi1g06890	AT5G42765.1 |		LOC_Os03g56320.1 | expressed protein		N/A		0	0	0	0	1	0	0	0	0	0	0	0	0	0	0	0	1	0
Bradi1g06900	AT1G75210.1 | HAD-superfamily hydrolase, subfamily IG, 5\'-nucleotidase		LOC_Os03g56310.1 | 5-nucleotidase domain-containing protein, putative, expressed		N/A		0	0	0	0	0	0	0	0	0	0	0	0	0	0	0	0	1	0
Bradi1g06902	No hits found		No hits found		N/A		0	0	0	0	0	0	0	0	1	0	0	0	0	0	0	0	0	0
Bradi1g06904	AT1G79010.1 | Alpha-helical ferredoxin		LOC_Os03g56300.1 | 4Fe-4S binding domain containing protein, expressed		N/A		0	0	0	0	0	0	0	0	1	0	0	0	0	0	0	0	1	0
Bradi1g06907	AT4G14960.2 | Tubulin/FtsZ family protein		LOC_Os11g14220.1 | tubulin/FtsZ domain containing protein, putative, expressed		FAR1		0	0	0	0	2	2	0	0	2	1	0	0	1	1	1	5	1	0
Bradi1g06917	AT2G22780.1 | peroxisomal NAD-malate dehydrogenase 1		LOC_Os03g56280.1 | lactate/malate dehydrogenase, putative, expressed		N/A		0	0	0	0	0	0	0	0	0	0	0	0	1	1	0	0	1	0
Bradi1g06930	AT5G65700.1 | Leucine-rich receptor-like protein kinase family protein		LOC_Os03g56270.1 | receptor protein kinase CLAVATA1 precursor, putative, expressed		N/A		0	0	0	1	0	0	0	0	0	1	0	0	0	0	0	0	0	0
Bradi1g06945	No hits found		No hits found		N/A		0	0	0	0	0	0	0	0	0	0	0	0	0	0	0	0	1	0
Bradi1g06960	AT3G49650.1 | P-loop containing nucleoside triphosphate hydrolases superfamily protein		LOC_Os03g56260.1 | kinesin motor domain containing protein, putative, expressed		N/A		0	0	0	3	0	1	0	1	2	0	0	0	0	0	1	2	0	0
Bradi1g06970	No hits found		No hits found		NAC		0	0	0	0	0	0	0	0	0	0	0	0	0	0	0	0	0	1
Bradi1g06980	AT2G16250.1 | Leucine-rich repeat protein kinase family protein		LOC_Os03g56250.1 | LRR receptor-like protein kinase, putative, expressed		N/A		0	0	0	1	1	0	0	0	0	0	0	0	0	1	1	3	0	0
Bradi1g06990	AT3G43980.1 | Ribosomal protein S14p/S29e family protein		LOC_Os12g32380.1 | 40S ribosomal protein S29, putative, expressed		N/A		0	0	0	0	0	0	0	1	0	0	0	0	0	1	1	1	0	0
Bradi1g06997	AT1G10020.1 | Protein of unknown function (DUF1005)		LOC_Os03g56220.1 | stress-induced protein, putative, expressed		N/A		0	0	0	0	0	0	0	0	1	0	0	0	0	0	1	10	0	0
Bradi1g06999	No hits found		No hits found		N/A		0	0	0	2	1	0	0	1	1	0	0	0	1	1	0	0	0	0
Bradi1g07001	No hits found		LOC_Os03g56200.1 | expressed protein		N/A		0	0	0	0	0	0	1	0	0	1	0	0	0	1	1	3	0	0
Bradi1g07006	AT4G37830.1 | cytochrome c oxidase-related		LOC_Os03g56190.1 | cytochrome c oxidase-related, putative, expressed		N/A		0	2	2	0	0	0	0	0	5	0	0	0	0	0	1	6	0	0
Bradi1g07010	AT2G37710.1 | receptor lectin kinase		LOC_Os04g44910.1 | receptor like protein kinase, putative, expressed		N/A		0	0	0	0	0	0	0	0	0	0	0	0	2	1	0	0	0	0
Bradi1g07020	AT4G08150.1 | KNOTTED-like from Arabidopsis thaliana		LOC_Os03g56110.1 | homeobox protein knotted-1, putative, expressed,LOC_Os07g03770.1 | Homeobox domain containing protein, expressed		N/A		0	0	0	1	0	0	0	0	0	0	0	0	1	0	0	0	0	0
Bradi1g07027	No hits found		No hits found		N/A		0	0	0	0	0	0	1	0	0	0	0	0	0	0	1	1	1	0
Bradi1g07035	AT5G57620.1 | myb domain protein 36		LOC_Os03g56090.1 | MYB family transcription factor, putative, expressed		N/A		0	0	0	0	0	1	0	0	0	0	0	0	0	2	0	0	0	0
Bradi1g07043	AT4G17000.1 |		LOC_Os03g56070.1 | expressed protein		N/A		0	0	0	1	0	1	0	0	0	0	0	1	3	1	0	0	0	0
Bradi1g07051	AT4G07960.1 | Cellulose-synthase-like C12		LOC_Os07g03260.1 | CSLC10 - cellulose synthase-like family C, expressed		N/A		0	1	0	0	1	0	0	0	0	0	0	0	0	0	1	2	0	0
Bradi1g07060	AT4G37750.1 | Integrase-type DNA-binding superfamily protein		LOC_Os03g56050.1 | AP2-like ethylene-responsive transcription factor AINTEGUMENTA, putative, expressed		N/A		0	1	0	0	0	1	0	0	0	0	0	0	0	0	0	0	0	0
Bradi1g07070	AT1G58470.1 | RNA-binding protein 1		LOC_Os07g03240.1 | RNA recognition motif containing protein, putative, expressed		N/A		0	1	0	0	0	0	0	0	2	0	0	0	0	0	1	1	0	0
Bradi1g07080	No hits found		No hits found		N/A		0	1	0	0	0	0	0	0	3	0	0	0	0	0	1	13	0	0
Bradi1g07090	AT5G49160.1 | methyltransferase 1		LOC_Os03g58400.1 | C-5 cytosine-specific DNA methylase, putative, expressed		N/A		0	0	0	0	0	0	0	0	0	1	0	0	2	0	1	8	0	0
Bradi1g07110	No hits found		LOC_Os03g56010.1 | bZIP transcription factor domain containing protein, expressed		N/A		0	0	0	0	1	0	0	1	0	0	0	0	1	2	0	0	0	0
Bradi1g07120	AT1G10150.1 | Carbohydrate-binding protein		LOC_Os03g56000.1 | PHLOEM 2-LIKE A10, putative, expressed		N/A		0	1	0	1	1	0	0	0	1	0	0	0	0	1	1	4	1	0
Bradi1g07126	No hits found		No hits found		N/A		0	0	0	0	0	0	0	0	0	0	0	0	0	0	1	1	0	0
Bradi1g07133	AT1G10140.1 | Uncharacterised conserved protein UCP031279		LOC_Os03g55980.1 | expressed protein		N/A		0	0	0	0	1	1	1	0	0	0	0	0	0	0	1	2	0	0
Bradi1g07140	AT1G49380.1 | cytochrome c biogenesis protein family		LOC_Os03g55970.1 | uncharacterized protein ycf44, putative, expressed		N/A		0	1	1	1	0	0	0	1	1	0	0	0	2	0	1	3	1	0
Bradi1g07145	AT3G50770.1 | calmodulin-like 41		LOC_Os03g55960.1 | EF hand family protein, putative, expressed		N/A		0	0	0	1	0	0	0	0	1	0	0	0	0	0	0	0	0	0
Bradi1g07150	AT3G50780.1 |		LOC_Os03g55950.3 | H-BTB1 - Bric-a-Brac, Tramtrack, Broad Complex BTB domain with H family conserved sequence, expressed		N/A		0	1	0	2	0	0	0	0	1	0	0	0	0	0	1	1	0	0
Bradi1g07160	AT1G74970.1 | ribosomal protein S9		LOC_Os03g55930.1 | ribosomal protein, putative, expressed		N/A		0	1	0	2	0	0	0	0	0	0	0	0	2	2	1	7	0	0
Bradi1g07170	AT5G42660.1 | Protein of unknown function (DUF616)		LOC_Os03g55920.1 | hydrolase, acting on carbon-nitrogen, putative, expressed		N/A		1	0	0	0	0	0	1	1	2	0	0	0	1	0	0	0	0	0
Bradi1g07180	AT5G66600.4 | Protein of unknown function, DUF547,AT5G66600.1 | Protein of unknown function, DUF547,AT5G66600.3 | Protein of unknown function, DUF547		LOC_Os03g55890.1 | ternary complex factor MIP1, putative, expressed		N/A		0	0	0	0	0	0	0	0	0	1	0	0	2	0	0	0	1	0
Bradi1g07185	AT4G34200.1 | D-3-phosphoglycerate dehydrogenase		LOC_Os04g55720.1 | D-3-phosphoglycerate dehydrogenase, chloroplast precursor, putative, expressed		N/A		0	0	0	0	0	1	0	0	0	0	0	0	0	0	0	0	0	0
Bradi1g07190	AT2G17980.1 | Sec1/munc18-like (SM) proteins superfamily		LOC_Os03g42320.1 | Sec1 family transport protein, putative, expressed		N/A		0	1	1	0	0	0	0	0	1	1	0	0	0	0	1	2	0	0
Bradi1g07195	No hits found		No hits found		N/A		0	1	1	1	0	0	0	1	1	0	0	0	0	0	1	1	0	0
Bradi1g07200	AT1G76600.1 |		LOC_Os07g03120.1 | expressed protein		N/A		0	0	0	0	0	1	0	0	1	0	0	0	0	1	1	1	0	1
Bradi1g07210	AT3G50810.1 | Uncharacterised protein family (UPF0497)		LOC_Os03g55870.1 | membrane associated DUF588 domain containing protein, putative, expressed		N/A		0	0	0	1	0	0	0	1	0	0	0	0	0	0	0	0	0	0
Bradi1g07220	AT3G50830.1 | cold-regulated 413-plasma membrane 2		LOC_Os03g55850.1 | cold acclimation protein WCOR413, putative, expressed		N/A		0	0	0	0	1	0	0	1	0	0	0	0	1	0	1	4	0	0
Bradi1g07222	AT1G47580.1 | Pentatricopeptide repeat (PPR) superfamily protein		LOC_Os03g55840.1 | pentatricopeptide, putative, expressed		N/A		0	0	0	1	1	0	1	0	2	0	0	0	1	3	0	0	1	1
Bradi1g07225	AT5G66560.1 | Phototropic-responsive NPH3 family protein		LOC_Os03g55830.1 | BTBN10 - Bric-a-Brac, Tramtrack, Broad Complex BTB domain with non-phototropic hypocotyl 3 NPH3 and coiled-coil domains, expressed		N/A		0	0	0	0	0	2	0	0	0	0	0	0	2	0	1	4	0	0
Bradi1g07230	No hits found		No hits found		N/A		0	0	0	0	0	0	0	1	0	0	0	0	1	1	1	2	0	0
Bradi1g07237	AT4G37200.1 | Thioredoxin superfamily protein		LOC_Os03g55820.1 | thioredoxin, putative, expressed		N/A		0	2	0	1	0	0	0	1	0	0	0	0	0	0	1	6	0	0
Bradi1g07247	AT5G42650.1 | allene oxide synthase		LOC_Os03g55800.1 | cytochrome P450, putative, expressed		TALE		0	0	0	1	1	0	1	0	1	0	0	0	0	1	1	1	0	0
Bradi1g07253	AT3G18940.1 | clast3-related		LOC_Os03g55784.1 | tumor necrosis factor superfamily, member 5-induced protein 1, putative, expressed		N/A		0	0	0	0	0	0	1	0	0	0	0	0	0	0	0	0	0	0
Bradi1g07260	AT5G56200.1 | C2H2 type zinc finger transcription factor family		LOC_Os04g39520.1 | ZOS4-08 - C2H2 zinc finger protein, expressed		MYB		0	0	0	0	0	0	0	0	0	0	0	0	0	1	0	0	0	0
Bradi1g07270	No hits found		LOC_Os03g55776.1 | expressed protein		N/A		2	1	0	1	0	0	0	0	0	0	0	0	0	0	1	3	0	0
Bradi1g07277	No hits found		LOC_Os03g55770.1 | expressed protein		N/A		0	0	0	1	0	0	0	0	1	0	0	0	0	1	0	0	0	0
Bradi1g07290	AT5G42630.1 | Homeodomain-like superfamily protein		LOC_Os03g55760.1 | MYB family transcription factor, putative, expressed		AP2		0	0	0	1	0	0	0	1	0	0	0	0	1	1	1	1	0	0
Bradi1g07300	AT1G47640.1 |		LOC_Os03g55730.1 | SSA2 - 2S albumin seed storage family protein precursor, putative, expressed		N/A		0	0	0	0	2	0	0	0	0	0	0	0	1	0	0	0	0	0
Bradi1g07303	AT2G26500.2 | cytochrome b6f complex subunit (petM), putative		LOC_Os03g55720.2 | cytochrome b6f complex subunit, putative, expressed,LOC_Os03g55720.1 | cytochrome b6f complex subunit, putative, expressed		N/A		0	0	0	1	0	1	0	0	0	0	0	0	1	0	1	1	0	0
Bradi1g07306	AT2G23520.1 | Pyridoxal phosphate (PLP)-dependent transferases superfamily protein		LOC_Os03g55704.1 | expressed protein		N/A		0	1	0	1	1	0	0	0	0	0	0	0	0	0	1	8	0	0
Bradi1g07310	AT2G15890.1 | maternal effect embryo arrest 14		LOC_Os03g55670.1 | expressed protein		bZIP		0	0	0	0	4	1	3	1	3	0	0	0	1	0	1	2	0	0
Bradi1g07320	AT4G09670.1 | Oxidoreductase family protein		LOC_Os10g26400.2 | uncharacterized oxidoreductase, putative, expressed		N/A		0	1	0	0	0	1	0	0	0	0	0	0	0	1	1	15	0	0
Bradi1g07325	No hits found		No hits found		N/A		0	0	0	0	1	0	0	0	1	0	0	0	1	1	1	1	0	1
Bradi1g07330	AT4G37130.1 | hydroxyproline-rich glycoprotein family protein		LOC_Os09g28019.1 | nucleoporin p58/p45, putative, expressed		N/A		0	0	0	0	1	1	0	0	1	0	0	0	0	0	1	3	0	2
Bradi1g07340	AT1G06870.1 | Peptidase S24/S26A/S26B/S26C family protein		LOC_Os03g55640.1 | OsSigP2 - Putative Type I Signal Peptidase homologue; employs a putative Ser/Lys catalytic dyad, expressed,LOC_Os03g55640.3 | OsSigP2 - Putative Type I Signal Peptidase homologue; employs a putative Ser/Lys catalytic dyad, expressed		N/A		0	0	0	1	0	1	0	2	1	0	0	0	0	1	1	1	0	0
Bradi1g07350	AT1G47310.1 |		LOC_Os03g55630.1 | expressed protein		N/A		0	0	0	1	0	0	0	0	0	0	0	0	1	0	0	0	0	0
Bradi1g07360	AT2G45490.1 | ataurora3		LOC_Os03g55620.3 | CAMK_CAMK_like_Aur_like.2 - CAMK includes calcium/calmodulin depedent protein kinases, expressed,LOC_Os03g55620.2 | CAMK_CAMK_like_Aur_like.2 - CAMK includes calcium/calmodulin depedent protein kinases, expressed		N/A		0	2	0	1	0	1	0	0	1	1	0	0	2	1	1	3	0	0
Bradi1g07370	AT1G07640.3 | Dof-type zinc finger DNA-binding family protein		LOC_Os03g55610.1 | dof zinc finger domain containing protein, putative, expressed		N/A		0	0	0	0	0	0	0	0	0	0	0	0	1	0	1	3	1	0
Bradi1g07380	No hits found		No hits found		N/A		0	0	0	0	1	0	0	0	1	0	0	0	0	1	1	2	0	0
Bradi1g07390	AT4G33950.1 | Protein kinase superfamily protein		LOC_Os03g55600.1 | CAMK_CAMK_like.22 - CAMK includes calcium/calmodulin depedent protein kinases, expressed		N/A		0	1	0	1	0	0	0	0	0	0	0	0	2	1	0	0	0	0
Bradi1g07400	No hits found		No hits found		N/A		0	0	0	1	0	1	0	0	0	0	0	0	0	0	1	3	2	0
Bradi1g07410	AT3G25790.1 | myb-like transcription factor family protein		LOC_Os03g55590.1 | MYB family transcription factor, putative, expressed		N/A		0	1	0	0	0	0	0	1	0	1	0	0	0	1	0	0	1	0
Bradi1g07415	No hits found		No hits found		N/A		0	0	0	0	0	0	0	0	1	0	0	0	3	1	0	0	0	0
Bradi1g07420	AT1G49520.1 | SWIB complex BAF60b domain-containing protein		LOC_Os03g55570.1 | upstream activation factor subunit spp27, putative, expressed		N/A		0	1	1	2	0	0	0	0	1	0	0	0	0	1	1	2	0	1
Bradi1g07430	AT5G66850.1 | mitogen-activated protein kinase kinase kinase 5		LOC_Os03g55560.1 | STE_MEKK_ste11_MAP3K.15 - STE kinases include homologs to sterile 7, sterile 11 and sterile 20 from yeast, expressed		N/A		0	1	0	0	0	0	0	0	0	0	0	0	0	0	1	3	0	0
Bradi1g07441	No hits found		No hits found		N/A		0	0	0	0	1	1	1	0	0	0	0	0	1	0	0	0	1	1
Bradi1g07450	AT3G49930.1 | C2H2 and C2HC zinc fingers superfamily protein		LOC_Os03g55540.1 | ZOS3-18 - C2H2 zinc finger protein, expressed		N/A		0	0	0	1	0	0	0	0	0	0	0	0	1	0	1	1	0	0
Bradi1g07457	No hits found		No hits found		N/A		0	0	0	0	1	0	0	0	0	0	0	0	1	0	0	0	1	0
Bradi1g07463	AT4G33760.1 | tRNA synthetase class II (D, K and N) family protein		LOC_Os01g06020.1 | aspartyl-tRNA synthetase, putative, expressed		N/A		0	0	0	0	1	0	0	0	1	0	0	0	3	0	0	0	1	0
Bradi1g07470	AT2G23060.1 | Acyl-CoA N-acyltransferases (NAT) superfamily protein		LOC_Os03g55530.1 | HLS, putative, expressed		N/A		0	0	0	1	0	0	1	0	0	1	0	0	2	1	1	2	0	2
Bradi1g07480	No hits found		No hits found		N/A		0	0	0	0	0	0	0	1	0	0	0	0	1	0	0	0	0	0
Bradi1g07490	No hits found		LOC_Os07g31680.1 | OsFBL38 - F-box domain and LRR containing protein, expressed		N/A		0	0	0	0	0	0	0	1	0	0	0	0	2	2	1	1	1	0
Bradi1g07492	No hits found		No hits found		C2H2		0	0	0	1	0	0	0	0	0	0	0	0	0	1	0	0	0	0
Bradi1g07495	AT1G20160.1 | Subtilisin-like serine endopeptidase family protein		LOC_Os09g30458.1 | subtilisin-like protease, putative, expressed		N/A		0	0	0	1	0	0	0	1	0	0	0	1	2	0	1	7	0	0
Bradi1g07500	AT5G41270.1 |		LOC_Os01g35990.1 | RNAse P Rpr2/Rpp21 subunit domain containing protein, expressed		N/A		0	0	0	0	0	1	0	0	0	0	0	0	1	1	0	0	0	0
Bradi1g07511	AT3G49600.1 | ubiquitin-specific protease 26		LOC_Os03g09260.1 | ubiquitin carboxyl-terminal hydrolase 26, putative, expressed		G2-like		0	0	0	2	0	0	0	0	1	0	0	0	0	1	0	0	0	0
Bradi1g07520	AT2G23060.1 | Acyl-CoA N-acyltransferases (NAT) superfamily protein		LOC_Os03g10810.1 | HLS, putative, expressed		N/A		0	2	1	0	2	0	2	0	0	0	0	0	2	0	1	1	0	0
Bradi1g07530	AT2G23070.1 | Protein kinase superfamily protein		LOC_Os03g55490.1 | casein kinase II subunit alpha-2, putative, expressed		N/A		0	0	0	1	0	0	0	0	0	0	0	0	0	0	1	1	0	0
Bradi1g07540	AT1G49890.1 | Family of unknown function (DUF566)		LOC_Os03g55470.1 | expressed protein		N/A		0	0	0	0	0	0	0	0	0	0	0	0	1	0	1	4	0	0
Bradi1g07550	AT5G43150.1 |		LOC_Os07g02460.1 | expressed protein		N/A		0	0	0	0	0	0	0	0	2	0	0	0	1	0	1	2	0	0
Bradi1g07560	AT3G49960.1 | Peroxidase superfamily protein		LOC_Os03g55420.1 | peroxidase precursor, putative, expressed		N/A		0	0	0	0	0	1	0	1	0	0	0	0	1	1	0	0	1	0
Bradi1g07562	AT5G67400.1 | root hair specific 19		LOC_Os03g55410.1 | peroxidase precursor, putative, expressed		N/A		0	0	0	0	0	0	0	0	0	0	0	0	0	1	1	1	2	0
Bradi1g07565	AT5G67390.1 | ,AT5G67390.2 |		LOC_Os03g55400.1 | expressed protein		N/A		0	0	0	1	0	0	1	0	1	0	0	0	0	0	1	2	2	0
Bradi1g07570	AT5G67380.1 | casein kinase alpha 1		LOC_Os07g02350.1 | casein kinase II subunit alpha-2, putative, expressed		N/A		0	0	0	1	1	1	0	0	1	1	0	0	1	0	1	1	0	0
Bradi1g07577	AT4G33910.1 | 2-oxoglutarate (2OG) and Fe(II)-dependent oxygenase superfamily protein		LOC_Os03g55380.1 | oxidoreductase, putative, expressed		N/A		0	0	0	0	0	0	0	0	0	0	0	0	0	0	0	0	0	0
Bradi1g07590	AT4G37480.1 | Chaperone DnaJ-domain superfamily protein		LOC_Os03g55360.1 | heat shock protein DnaJ, putative, expressed		N/A		0	0	0	1	0	1	1	0	1	0	0	0	1	0	1	1	0	2
Bradi1g07600	AT5G67360.1 | Subtilase family protein		LOC_Os03g55350.1 | OsSub31 - Putative Subtilisin homologue, expressed		Dof		0	0	0	0	0	0	0	0	0	0	0	0	0	0	0	0	0	0
Bradi1g07611	AT1G77360.1 | Tetratricopeptide repeat (TPR)-like superfamily protein		LOC_Os03g55340.1 | pentatricopeptide, putative, expressed		N/A		0	0	0	0	0	0	0	2	1	0	0	0	0	0	1	5	0	0
Bradi1g07620	AT5G65860.2 | ankyrin repeat family protein		LOC_Os03g55330.1 | ankyrin repeat domain containing protein, putative, expressed		N/A		0	0	0	0	1	0	2	0	5	0	0	0	0	2	1	1	2	0
Bradi1g07625	AT4G33920.1 | Protein phosphatase 2C family protein		LOC_Os03g55320.1 | protein phosphatase 2C, putative, expressed		N/A		0	0	0	0	0	0	0	0	0	0	0	0	1	0	0	0	0	0
Bradi1g07630	AT2G14880.1 | SWIB/MDM2 domain superfamily protein		LOC_Os03g55310.1 | SWIB/MDM2 domain containing protein, expressed		G2-like		0	0	0	0	0	0	0	0	0	1	0	0	1	0	1	1	0	0
Bradi1g07635	No hits found		No hits found		N/A		0	0	0	0	0	2	0	0	1	0	0	0	1	0	1	1	1	0
Bradi1g07640	AT5G59845.1 | Gibberellin-regulated family protein		LOC_Os03g55290.1 | GASR3 - Gibberellin-regulated GASA/GAST/Snakin family protein precursor, expressed		N/A		0	0	0	0	0	4	0	1	5	0	0	0	0	0	1	2	0	0
Bradi1g07650	AT5G59845.1 | Gibberellin-regulated family protein		LOC_Os03g55290.1 | GASR3 - Gibberellin-regulated GASA/GAST/Snakin family protein precursor, expressed		N/A		0	0	0	0	0	1	1	0	2	0	0	0	0	2	1	1	0	0
Bradi1g07655	AT1G14810.1 | semialdehyde dehydrogenase family protein		LOC_Os03g55280.1 | semialdehyde dehydrogenase, NAD binding domain containing protein, putative, expressed		N/A		0	1	0	1	1	1	0	0	1	0	0	0	1	0	1	2	0	0
Bradi1g07660	AT4G34270.1 | TIP41-like family protein		LOC_Os03g55270.1 | TIP41, putative, expressed		C2H2		0	0	0	0	0	0	0	0	0	0	0	1	4	2	1	2	0	0
Bradi1g07665	AT4G37320.1 | cytochrome P450, family 81, subfamily D, polypeptide 5		LOC_Os03g55240.1 | cytochrome P450, putative, expressed		N/A		0	0	0	0	0	1	0	0	1	0	0	0	1	1	0	0	0	1
Bradi1g07670	AT3G19500.1 | basic helix-loop-helix (bHLH) DNA-binding superfamily protein		LOC_Os03g55220.1 | bHelix-loop-helix transcription factor, putative, expressed		N/A		1	1	1	1	0	0	0	1	1	0	0	0	0	1	0	0	1	0
Bradi1g07680	AT5G61350.1 | Protein kinase superfamily protein		LOC_Os03g55210.1 | TKL_IRAK_CrRLK1L-1.1 - The CrRLK1L-1 subfamily has homology to the CrRLK1L homolog, expressed		N/A		0	0	0	0	0	0	0	0	0	0	0	0	0	1	0	0	0	0
Bradi1g07683	AT4G29910.1 | origin recognition complex protein 5		LOC_Os03g55200.1 | ORC5 - Putative origin recognition complex subunit 5, expressed		N/A		0	1	0	0	0	0	0	1	2	0	0	0	0	0	1	1	0	0
Bradi1g07686	AT1G13970.1 | Protein of unknown function (DUF1336)		LOC_Os03g55180.1 | DUF1336 domain containing protein, expressed		N/A		0	0	0	0	0	0	0	0	1	0	0	0	2	0	1	4	0	0
Bradi1g07693	AT1G13960.1 | WRKY DNA-binding protein 4		LOC_Os03g55164.2 | WRKY4, expressed		N/A		0	0	0	0	0	0	0	0	0	0	0	0	1	0	1	2	0	0
Bradi1g07700	AT3G29185.1 | Domain of unknown function (DUF3598)		LOC_Os03g55164.1 | WRKY4, expressed		N/A		0	0	0	1	0	3	0	1	0	0	0	1	1	0	1	2	0	1
Bradi1g07710	AT1G69400.1 | Transducin/WD40 repeat-like superfamily protein		LOC_Os03g55140.2 | transducin family protein, putative, expressed,LOC_Os03g55140.1 | transducin family protein, putative, expressed		N/A		0	0	0	0	1	0	0	0	0	0	0	0	2	0	1	1	0	0
Bradi1g07717	AT1G13940.1 | Plant protein of unknown function (DUF863)		LOC_Os03g55130.2 | expressed protein		N/A		1	0	0	0	1	0	0	0	0	0	0	0	0	1	1	2	0	0
Bradi1g07737	AT1G18370.1 | ATP binding microtubule motor family protein		LOC_Os01g33040.1 | kinesin motor domain containing protein, expressed		N/A		0	1	1	0	0	0	0	0	0	0	0	0	0	1	1	3	0	0
Bradi1g07750	AT3G15660.2 | glutaredoxin 4		LOC_Os01g34620.3 | OsGrx_S15.1 - glutaredoxin subgroup II, expressed		N/A		0	0	0	0	0	0	0	0	0	0	0	0	1	1	1	1	0	0
Bradi1g07760	No hits found		No hits found		N/A		0	1	1	0	1	0	2	0	2	0	0	0	0	0	1	1	1	0
Bradi1g07770	AT5G15350.1 | early nodulin-like protein 17		LOC_Os03g55120.1 | plastocyanin-like domain containing protein, putative, expressed		N/A		0	1	0	1	0	0	1	0	3	0	0	0	0	1	1	8	0	1
Bradi1g07780	AT2G03430.1 | Ankyrin repeat family protein		LOC_Os03g55110.1 | 26S proteasome non-ATPase regulatory subunit 10, putative, expressed		N/A		0	0	0	1	1	1	0	0	0	0	0	0	1	0	1	11	0	0
Bradi1g07790	AT2G41500.1 | WD-40 repeat family protein / small nuclear ribonucleoprotein Prp4p-related		LOC_Os03g23935.1 | WD domain, G-beta repeat domain containing protein, expressed		N/A		0	0	0	0	0	0	0	0	0	0	0	0	0	0	1	1	0	0
Bradi1g07797	AT5G15410.2 | Cyclic nucleotide-regulated ion channel family protein		LOC_Os03g55100.1 | cyclic nucleotide-gated ion channel 2, putative, expressed		N/A		0	1	0	1	0	0	1	0	3	0	0	0	0	0	1	2	0	0
Bradi1g07810	AT3G29320.1 | Glycosyl transferase, family 35		LOC_Os03g55090.1 | alpha-glucan phosphorylast isozyme, putative, expressed		N/A		0	0	0	2	0	1	0	0	1	0	0	0	1	0	0	0	0	0
Bradi1g07820	AT5G05800.2 |		LOC_Os12g10550.1 | transposon protein, putative, CACTA, En/Spm sub-class, expressed		N/A		0	1	1	0	0	0	0	1	0	0	0	0	0	0	0	0	1	0
Bradi1g07830	No hits found		LOC_Os10g34614.1 | csAtPR5, putative, expressed		N/A		1	0	0	1	0	0	1	0	2	0	0	0	0	0	1	4	0	0
Bradi1g07840	AT3G29320.1 | Glycosyl transferase, family 35		LOC_Os03g55090.1 | alpha-glucan phosphorylast isozyme, putative, expressed		N/A		0	2	2	1	0	0	0	0	2	0	0	0	0	1	1	1	1	0
Bradi1g07850	AT1G69310.2 | WRKY DNA-binding protein 57		LOC_Os03g55080.1 | WRKY3, expressed		N/A		0	0	0	0	0	0	1	0	0	0	0	0	0	0	1	3	0	0
Bradi1g07860	No hits found		No hits found		N/A		0	1	1	1	0	0	0	1	1	0	0	0	1	1	0	0	0	0
Bradi1g07870	AT5G15490.1 | UDP-glucose 6-dehydrogenase family protein		LOC_Os12g25690.1 | UDP-glucose 6-dehydrogenase, putative, expressed		N/A		0	0	0	0	0	1	0	0	4	0	0	0	2	0	0	0	0	0
Bradi1g07880	AT5G60920.1 | COBRA-like extracellular glycosyl-phosphatidyl inositol-anchored protein family		LOC_Os05g32110.1 | COBRA, putative, expressed		N/A		0	0	0	0	0	0	0	0	1	0	0	0	0	1	1	3	1	0
Bradi1g07885	No hits found		No hits found		N/A		0	0	0	0	0	0	0	0	1	0	0	0	1	0	1	6	0	0
Bradi1g07890	AT3G02100.1 | UDP-Glycosyltransferase superfamily protein		LOC_Os03g55050.1 | UDP-glucoronosyl and UDP-glucosyl transferase domain containing protein, expressed		N/A		0	1	0	0	1	0	2	1	2	0	0	0	0	0	1	1	0	0
Bradi1g07900	No hits found		No hits found		N/A		0	1	0	0	0	0	0	0	2	0	0	0	2	0	1	2	1	0
Bradi1g07910	AT3G02100.1 | UDP-Glycosyltransferase superfamily protein		LOC_Os03g55040.1 | UDP-glucoronosyl and UDP-glucosyl transferase domain containing protein, expressed		N/A		0	0	0	0	0	0	0	0	0	0	0	0	1	1	1	3	0	0
Bradi1g07920	AT3G02100.1 | UDP-Glycosyltransferase superfamily protein		LOC_Os03g55020.1 | UDP-glucoronosyl and UDP-glucosyl transferase domain containing protein, expressed		N/A		0	0	0	0	0	0	0	0	0	0	0	1	2	1	1	3	0	0
Bradi1g07930	AT3G02100.1 | UDP-Glycosyltransferase superfamily protein		LOC_Os03g55030.1 | UDP-glucoronosyl and UDP-glucosyl transferase domain containing protein, expressed		N/A		0	0	0	0	0	0	0	0	1	0	0	0	0	0	0	0	0	0
Bradi1g07936	No hits found		LOC_Os03g06750.1 | expressed protein		bHLH		0	0	0	2	1	0	0	1	2	0	0	0	0	0	1	3	0	0
Bradi1g07942	AT3G02100.1 | UDP-Glycosyltransferase superfamily protein		LOC_Os03g55030.1 | UDP-glucoronosyl and UDP-glucosyl transferase domain containing protein, expressed		N/A		0	0	0	0	0	1	0	0	0	1	0	0	2	1	0	0	1	0
Bradi1g07950	AT3G02100.1 | UDP-Glycosyltransferase superfamily protein		LOC_Os03g55030.1 | UDP-glucoronosyl and UDP-glucosyl transferase domain containing protein, expressed		N/A		0	0	0	0	1	1	0	0	0	0	0	0	2	1	1	3	0	0
Bradi1g07960	AT3G02100.1 | UDP-Glycosyltransferase superfamily protein		LOC_Os03g55030.1 | UDP-glucoronosyl and UDP-glucosyl transferase domain containing protein, expressed		N/A		0	1	0	0	1	2	1	0	1	0	0	0	2	0	1	3	1	0
Bradi1g07970	AT5G07960.1 |		LOC_Os03g54980.1 | expressed protein		WRKY		0	0	0	0	0	1	0	0	0	0	0	0	0	0	1	8	0	0
Bradi1g07980	AT5G07980.1 | dentin sialophosphoprotein-related		LOC_Os03g54970.1 | expressed protein		N/A		0	0	0	0	0	0	0	0	0	1	0	0	2	1	1	1	0	0
Bradi1g07991	AT3G05010.1 | Protein of unknown function, transmembrane-40		LOC_Os03g54920.1 | expressed protein		N/A		0	0	0	1	0	0	0	0	0	0	0	0	1	0	0	0	0	0
Bradi1g08000	AT1G18650.1 | plasmodesmata callose-binding protein 3		LOC_Os03g54910.1 | X8 domain containing protein, expressed		N/A		0	0	0	0	0	2	0	0	3	1	0	0	1	1	0	0	1	0
Bradi1g08010	No hits found		No hits found		N/A		0	0	0	0	0	0	0	0	1	0	0	0	1	1	1	1	0	0
Bradi1g08020	AT3G02130.1 | receptor-like protein kinase 2		LOC_Os03g54900.1 | phytosulfokine receptor precursor, putative, expressed		N/A		0	0	0	0	0	0	0	0	2	0	0	0	1	0	0	0	1	0
Bradi1g08025	No hits found		LOC_Os02g42450.1 | RIPER1 - Ripening-related family protein precursor, expressed		N/A		0	0	0	1	0	0	0	0	0	0	0	0	1	0	1	7	0	0
Bradi1g08030	AT5G48760.1 | Ribosomal protein L13 family protein		LOC_Os03g54890.1 | ribosomal protein L13, putative, expressed		N/A		0	0	0	0	0	0	0	0	1	0	0	0	2	0	1	2	0	0
Bradi1g08040	AT3G29760.1 | Haloacid dehalogenase-like hydrolase (HAD) superfamily protein,AT4G26190.1 | Haloacid dehalogenase-like hydrolase (HAD) superfamily protein		LOC_Os03g54850.1 | NLI interacting factor-like phosphatase, putative, expressed,LOC_Os03g54870.1 | NLI interacting factor-like phosphatase, putative, expressed		N/A		0	0	0	1	0	0	0	3	2	0	0	0	1	0	0	0	0	0
Bradi1g08050	AT5G39040.1 | transporter associated with antigen processing protein 2		LOC_Os03g54790.1 | ABC transporter, ATP-binding protein, putative, expressed		N/A		0	0	0	0	0	1	0	0	0	0	0	0	0	0	0	0	0	0
Bradi1g08060	AT1G69220.2 | Protein kinase superfamily protein,AT1G69220.1 | Protein kinase superfamily protein		LOC_Os03g54780.1 | STE_PAK_Ste20_KHSh_GCKh_HPKh.1 - STE kinases include homologs to sterile 7, sterile 11 and sterile 20 from yeast, expressed		N/A		0	0	0	1	0	1	0	0	1	0	0	0	0	1	1	3	0	0
Bradi1g08070	No hits found		No hits found		N/A		0	1	0	1	0	1	0	0	0	0	0	0	1	0	1	1	0	0
Bradi1g08075	AT5G60940.1 | Transducin/WD40 repeat-like superfamily protein		LOC_Os03g54770.1 | WD domain, G-beta repeat domain containing protein, expressed		N/A		0	0	0	0	0	1	0	0	1	0	0	0	0	0	1	2	0	0
Bradi1g08080	AT5G15640.1 | Mitochondrial substrate carrier family protein		LOC_Os03g54760.1 | mitochondrial carrier protein, putative, expressed		N/A		0	0	0	0	0	0	0	1	1	0	0	0	0	1	1	1	0	0
Bradi1g08095	AT5G60920.1 | COBRA-like extracellular glycosyl-phosphatidyl inositol-anchored protein family		LOC_Os05g32110.1 | COBRA, putative, expressed,LOC_Os05g32110.3 | COBRA, putative, expressed		N/A		1	0	0	2	1	1	0	0	0	0	0	0	0	0	0	0	1	0
Bradi1g08106	AT1G26340.1 | cytochrome B5 isoform A		LOC_Os05g01820.1 | cytochrome b5-like Heme/Steroid binding domain containing protein, expressed		WRKY		0	1	0	0	0	0	0	0	1	0	0	0	0	0	1	1	0	0
Bradi1g08113	AT3G02310.1 | K-box region and MADS-box transcription factor family protein		LOC_Os03g54170.1 | OsMADS34 - MADS-box family gene with MIKCc type-box, expressed		N/A		0	1	1	0	0	0	1	0	0	0	0	0	1	0	1	10	1	0
Bradi1g08120	AT5G05800.1 |		LOC_Os12g10550.1 | transposon protein, putative, CACTA, En/Spm sub-class, expressed		N/A		0	1	1	1	1	0	1	0	2	0	0	0	0	0	0	0	0	0
Bradi1g08130	AT1G69120.1 | K-box region and MADS-box transcription factor family protein		LOC_Os03g54160.2 | OsMADS14 - MADS-box family gene with MIKCc type-box, expressed		N/A		0	0	0	1	1	1	0	0	0	0	0	0	0	0	0	0	2	0
Bradi1g08135	AT1G69060.1 | Chaperone DnaJ-domain superfamily protein		LOC_Os03g54150.2 | expressed protein		N/A		0	0	0	1	1	0	1	0	1	0	0	0	1	0	0	0	1	0
Bradi1g08140	AT5G45890.1 | senescence-associated gene 12		LOC_Os03g54130.1 | cysteine protease 1 precursor, putative, expressed		N/A		0	0	0	0	1	2	0	1	0	0	0	0	0	3	1	3	0	0
Bradi1g08142	No hits found		No hits found		N/A		0	0	0	0	0	0	0	0	0	0	0	0	1	1	0	0	1	0
Bradi1g08145	No hits found		LOC_Os04g20920.1 | H-BTB2 - Bric-a-Brac, Tramtrack, Broad Complex BTB domain with H family conserved sequence, expressed		N/A		0	1	0	2	1	0	0	0	1	0	0	0	0	0	1	1	0	0
Bradi1g08150	AT5G55630.1 | Outward rectifying potassium channel protein		LOC_Os03g54100.1 | potassium channel protein, putative, expressed,LOC_Os03g54100.2 | potassium channel protein, putative, expressed		N/A		0	1	0	1	1	1	0	0	0	0	0	0	0	0	1	4	0	0
Bradi1g08157	AT3G13170.1 | Spo11/DNA topoisomerase VI, subunit A protein		LOC_Os03g54091.1 | OsTOP6A1 - Topoisomerase 6 subunit A homolog 1, expressed		N/A		0	0	0	0	1	0	0	0	1	0	0	0	1	1	1	1	0	0
Bradi1g08170	AT5G35840.1 | phytochrome C		LOC_Os03g54084.1 | phytochrome C, putative, expressed		N/A		1	0	0	1	0	0	0	2	0	0	0	0	1	0	0	0	0	1
Bradi1g08177	No hits found		No hits found		N/A		1	0	0	0	0	0	0	0	0	0	0	0	0	0	1	3	0	0
Bradi1g08183	No hits found		No hits found		N/A		0	0	0	0	0	1	0	0	2	0	0	0	0	0	1	2	0	0
Bradi1g08190	AT4G16380.1 | Heavy metal transport/detoxification superfamily protein		LOC_Os03g54050.1 | anther-specific proline-rich protein APG precursor, putative, expressed		N/A		0	0	0	0	0	0	0	1	0	0	0	0	0	1	0	0	0	1
Bradi1g08201	No hits found		No hits found		N/A		0	0	0	0	0	0	0	0	1	0	0	0	3	1	1	2	0	0
Bradi1g08210	AT4G16370.1 | oligopeptide transporter		LOC_Os03g54000.1 | oligopeptide transporter, putative, expressed		N/A		0	0	0	1	0	0	0	0	2	0	0	0	1	0	1	3	0	0
Bradi1g08217	AT5G55540.1 | tornado 1		LOC_Os03g53990.1 | expressed protein		N/A		0	0	0	1	0	1	0	1	1	0	0	0	0	0	1	1	1	0
Bradi1g08230	No hits found		No hits found		N/A		0	0	0	1	0	0	1	0	2	0	0	0	0	1	1	1	0	0
Bradi1g08236	AT2G04900.1 |		LOC_Os03g53980.2 | expressed protein		N/A		0	1	0	3	0	0	0	1	0	0	0	0	0	0	0	0	0	0
Bradi1g08240	AT5G67360.1 | Subtilase family protein		LOC_Os07g39020.1 | OsSub53 - Putative Subtilisin homologue, expressed		N/A		0	0	0	0	0	0	0	0	0	0	0	0	0	0	0	0	0	0
Bradi1g08250	AT4G17240.1 |		LOC_Os03g53970.1 | expressed protein		N/A		0	0	0	0	0	0	0	0	0	0	0	0	1	1	1	1	0	0
Bradi1g08260	AT4G16420.1 | homolog of yeast ADA2 2B		LOC_Os03g53960.1 | transcriptional adaptor, putative, expressed		N/A		0	0	0	0	1	1	0	0	1	1	0	0	1	0	1	1	2	0
Bradi1g08270	AT1G08470.1 | strictosidine synthase-like 3		LOC_Os03g53950.1 | strictosidine synthase, putative, expressed		N/A		0	1	0	1	0	0	0	0	0	0	0	0	0	0	1	4	0	0
Bradi1g08280	AT2G27180.1 |		LOC_Os10g25800.1 | expressed protein		N/A		0	0	0	0	0	0	0	0	1	0	0	0	0	0	1	2	0	0
Bradi1g08287	AT3G44050.1 | P-loop containing nucleoside triphosphate hydrolases superfamily protein		LOC_Os03g53920.1 | kinesin motor domain containing protein, putative, expressed		N/A		0	0	0	1	0	0	0	0	0	0	0	0	1	1	0	0	0	0
Bradi1g08290	No hits found		No hits found		N/A		0	0	0	0	0	0	0	0	1	0	0	0	2	1	0	0	0	0
Bradi1g08294	AT1G04130.1 | Tetratricopeptide repeat (TPR)-like superfamily protein		LOC_Os03g53910.1 | tetratricopeptide repeat domain containing protein, expressed		N/A		0	0	0	0	0	0	0	0	0	0	0	0	1	0	0	0	1	0
Bradi1g08301	AT3G11930.1 | Adenine nucleotide alpha hydrolases-like superfamily protein		LOC_Os03g53900.1 | universal stress protein domain containing protein, putative, expressed		N/A		1	1	0	1	0	1	0	1	0	0	0	0	3	1	0	0	0	0
Bradi1g08310	No hits found		LOC_Os03g06750.1 | expressed protein		N/A		0	1	1	0	0	0	0	0	0	0	0	0	0	0	1	6	0	0
Bradi1g08320	No hits found		LOC_Os02g39190.1 | expressed protein		N/A		0	1	0	1	1	1	0	0	0	0	0	0	1	3	1	2	0	1
Bradi1g08326	AT3G58470.1 | nucleic acid binding;methyltransferases		LOC_Os03g53890.1 | N2, N2-dimethylguanosine tRNA methyltransferase, putative, expressed		MIKC_MADS		0	0	0	0	0	3	0	0	0	0	0	0	0	0	1	5	0	0
Bradi1g08333	AT5G20930.1 | Protein kinase superfamily protein		LOC_Os03g53880.1 | serine/threonine-protein kinase TOUSLED, putative, expressed		N/A		0	1	0	0	0	0	0	0	0	0	0	0	0	1	1	2	0	0
Bradi1g08340	No hits found		No hits found		MIKC_MADS		0	1	0	0	0	0	0	0	0	0	0	0	0	0	1	3	0	0
Bradi1g08350	AT5G20950.2 | Glycosyl hydrolase family protein,AT5G20950.1 | Glycosyl hydrolase family protein		LOC_Os03g53860.1 | periplasmic beta-glucosidase precursor, putative, expressed		N/A		0	0	0	0	0	0	0	0	0	0	0	0	1	1	1	3	0	0
Bradi1g08357	AT5G20950.1 | Glycosyl hydrolase family protein		LOC_Os03g53800.5 | periplasmic beta-glucosidase precursor, putative, expressed		N/A		1	0	0	1	1	0	0	0	1	0	0	0	0	0	1	5	1	0
Bradi1g08363	AT5G20950.2 | Glycosyl hydrolase family protein		LOC_Os03g53800.4 | periplasmic beta-glucosidase precursor, putative, expressed		N/A		0	0	0	0	0	0	0	0	2	0	0	0	0	1	1	2	1	0
Bradi1g08370	AT5G04885.1 | Glycosyl hydrolase family protein		LOC_Os03g53790.1 | periplasmic beta-glucosidase precursor, putative, expressed		N/A		0	2	2	0	0	1	0	0	0	0	0	0	1	0	1	4	0	0
Bradi1g08380	AT2G38290.1 | ammonium transporter 2		LOC_Os01g65000.1 | ammonium transporter protein, putative, expressed		N/A		0	0	0	2	0	0	0	1	1	0	0	0	1	0	0	0	0	0
Bradi1g08390	AT5G32450.1 | RNA binding (RRM/RBD/RNP motifs) family protein		LOC_Os03g53770.1 | RNA recognition motif containing protein, putative, expressed		N/A		0	0	0	0	0	1	0	0	1	0	0	0	0	0	1	1	0	0
Bradi1g08400	AT5G04895.1 | DEA(D/H)-box RNA helicase family protein		LOC_Os03g53760.1 | ATP-dependent RNA helicase DHX36, putative, expressed		N/A		0	0	0	1	0	1	0	0	1	1	0	0	1	0	1	1	1	0
Bradi1g08403	AT4G16440.1 | ferredoxin hydrogenases		LOC_Os03g53750.1 | nuclear prelamin A recognition factor, putative, expressed		N/A		0	1	0	0	0	1	0	0	3	0	0	0	1	0	1	1	0	0
Bradi1g08406	AT5G37480.1 |		LOC_Os03g53740.1 | expressed protein		N/A		3	0	0	0	0	0	0	1	0	1	0	0	0	0	1	2	0	1
Bradi1g08410	AT4G36750.1 | Quinone reductase family protein		LOC_Os03g53730.1 | flavoprotein wrbA, putative, expressed		N/A		0	1	0	0	2	1	1	0	2	0	0	0	0	0	1	3	0	0
Bradi1g08415	AT1G13570.1 | F-box/RNI-like superfamily protein		LOC_Os07g06900.1 | OsFBLD3 - F-box, LRR and FBD domain containing protein, expressed		N/A		0	0	0	0	0	1	0	0	0	0	0	0	1	0	1	6	1	0
Bradi1g08421	AT3G53030.1 | ser/arg-rich protein kinase 4		LOC_Os03g53720.1 | SRPK4, putative, expressed		N/A		1	0	0	0	0	1	0	0	1	0	0	0	0	0	1	5	1	1
Bradi1g08430	No hits found		No hits found		N/A		0	0	0	0	1	0	0	0	0	0	0	0	0	0	0	0	0	0
Bradi1g08436	AT3G14240.1 | Subtilase family protein		LOC_Os07g39020.1 | OsSub53 - Putative Subtilisin homologue, expressed		N/A		0	0	0	0	0	0	0	0	0	0	0	0	2	0	0	0	0	0
Bradi1g08440	AT1G55370.2 | NDH-dependent cyclic electron flow 5		LOC_Os03g53710.1 | aldose 1-epimerase, putative, expressed		N/A		0	0	0	1	1	0	1	1	0	0	0	0	1	1	1	1	0	1
Bradi1g08451	AT1G54390.3 | PHD finger protein-related		LOC_Os03g53700.1 | PHD-finger domain containing protein, putative, expressed		N/A		0	0	0	0	0	0	0	0	0	0	0	0	0	0	0	0	0	0
Bradi1g08460	AT3G03980.1 | NAD(P)-binding Rossmann-fold superfamily protein		LOC_Os03g53690.1 | oxidoreductase, short chain dehydrogenase/reductase family domain containing protein, expressed		N/A		0	0	0	0	0	1	0	0	0	0	0	0	0	1	1	2	0	0
Bradi1g08470	No hits found		No hits found		MYB_related		0	2	0	0	1	0	1	1	0	0	0	0	0	0	1	2	0	0
Bradi1g08480	AT2G31900.1 | myosin-like protein XIF		LOC_Os03g53660.1 | Myosin head domain containing protein, expressed		N/A		0	0	0	0	0	1	0	1	0	0	0	0	0	0	0	0	0	0
Bradi1g08490	AT1G05385.1 | photosystem II 11 kDa protein-related		LOC_Os03g53640.1 | expressed protein		N/A		0	0	0	0	1	1	0	0	1	0	0	0	1	2	0	0	0	1
Bradi1g08500	AT1G05380.2 | Acyl-CoA N-acyltransferase with RING/FYVE/PHD-type zinc finger protein,AT4G14920.1 | Acyl-CoA N-acyltransferase with RING/FYVE/PHD-type zinc finger protein		LOC_Os03g53630.1 | PHD finger family protein, putative, expressed		N/A		0	0	0	1	0	1	0	0	0	0	0	0	3	1	1	2	2	0
Bradi1g08505	AT3G22490.1 | Seed maturation protein		LOC_Os06g23350.1 | late embryogenesis abundant protein D-34, putative, expressed		N/A		0	0	0	0	0	0	0	1	0	0	0	0	1	0	1	3	0	0
Bradi1g08510	AT2G37410.2 | translocase inner membrane subunit 17-2		LOC_Os07g41330.1 | mitochondrial import inner membrane translocase subunit Tim17, putative, expressed		N/A		0	0	0	0	0	1	0	0	0	0	1	0	0	0	1	4	0	0
Bradi1g08517	AT3G22490.1 | Seed maturation protein		LOC_Os03g53610.1 | late embryogenesis abundant protein D-34, putative, expressed		N/A		0	0	0	1	0	0	0	0	0	0	0	0	2	0	0	0	0	0
Bradi1g08521	AT5G47420.1 | Tryptophan RNA-binding attenuator protein-like		LOC_Os03g53600.1 | HTH DNA-binding protein, putative, expressed,LOC_Os03g53600.2 | HTH DNA-binding protein, putative, expressed		N/A		0	0	0	0	0	0	0	0	0	0	0	0	0	0	0	0	2	0
Bradi1g08525	AT4G02210.1 |		LOC_Os03g53590.2 | expressed protein		N/A		0	0	0	0	0	1	1	0	1	0	0	0	0	1	0	0	0	0
Bradi1g08530	AT1G05410.1 | Protein of unknown function (DUF1423)		LOC_Os03g53590.2 | expressed protein		N/A		0	0	0	0	0	1	0	0	1	0	0	0	0	0	1	3	0	0
Bradi1g08540	AT1G05440.1 | C-8 sterol isomerases		LOC_Os03g53580.1 | expressed protein		N/A		2	0	0	0	0	0	0	0	0	0	0	0	0	0	1	2	0	0
Bradi1g08545	AT3G22540.1 | Protein of unknown function (DUF1677)		LOC_Os03g53540.1 | expressed protein		N/A		0	1	0	0	0	0	2	0	2	0	0	0	1	1	0	0	0	0
Bradi1g08550	AT1G03110.1 | Transducin/WD40 repeat-like superfamily protein		LOC_Os03g53530.1 | WD domain, G-beta repeat domain containing protein, expressed		N/A		0	0	0	1	0	0	0	0	1	0	0	0	0	0	1	2	0	0
Bradi1g08560	AT5G11460.1 | Protein of unknown function (DUF581)		LOC_Os03g53520.1 | expressed protein		N/A		0	0	0	3	0	0	0	0	0	0	0	0	1	1	0	0	0	1
Bradi1g08570	AT5G50230.1 | Transducin/WD40 repeat-like superfamily protein		LOC_Os03g53510.2 | WD domain, G-beta repeat domain containing protein, expressed		N/A		0	0	0	0	0	1	0	0	1	0	0	0	0	1	1	2	1	0
Bradi1g08580	AT3G22670.1 | Pentatricopeptide repeat (PPR) superfamily protein		LOC_Os03g53490.1 | PPR repeat containing protein, expressed		N/A		0	2	1	0	0	0	0	0	0	0	0	0	1	2	0	0	1	0
Bradi1g08587	AT4G14790.1 | ATP-dependent RNA helicase, mitochondrial (SUV3)		LOC_Os03g53500.1 | helicase conserved C-terminal domain containing protein, expressed		N/A		0	0	0	0	0	0	0	0	0	0	0	0	1	2	0	0	1	1
Bradi1g08597	AT3G45980.1 | Histone superfamily protein		LOC_Os03g17084.1 | Core histone H2A/H2B/H3/H4 domain containing protein, putative, expressed		N/A		0	0	0	1	0	0	0	0	1	0	0	0	1	2	1	1	0	0
Bradi1g08607	AT3G22750.1 | Protein kinase superfamily protein		LOC_Os03g53410.1 | protein kinase domain containing protein, expressed		N/A		0	0	0	0	1	0	1	0	0	0	0	0	0	0	0	0	0	0
Bradi1g08620	AT1G03070.2 | Bax inhibitor-1 family protein		LOC_Os03g53400.1 | transmembrane BAX inhibitor motif-containing protein, putative, expressed		N/A		0	0	0	1	0	0	0	0	1	0	0	0	1	1	0	0	0	0
Bradi1g08627	AT1G06770.1 | DREB2A-interacting protein 1		LOC_Os03g53080.1 | zinc finger, C3HC4 type domain containing protein, expressed		N/A		0	0	0	0	0	1	0	1	2	1	0	0	0	0	1	8	0	0
Bradi1g08639	No hits found		No hits found		N/A		1	1	0	0	2	2	0	0	3	0	0	0	0	0	1	6	0	0
Bradi1g08649	No hits found		No hits found		N/A		1	0	0	0	0	0	0	0	0	0	0	1	1	0	1	1	0	0
Bradi1g08660	No hits found		No hits found		N/A		0	1	1	0	0	0	0	1	0	0	0	0	1	0	1	1	0	0
Bradi1g08665	AT4G29250.1 | HXXXD-type acyl-transferase family protein		LOC_Os03g53360.1 | transferase family protein, putative, expressed		N/A		0	0	0	0	0	0	0	0	0	0	0	0	0	0	0	0	0	0
Bradi1g08670	AT2G26150.1 | heat shock transcription factor A2		LOC_Os03g53340.6 | HSF-type DNA-binding domain containing protein, expressed,LOC_Os03g53340.3 | HSF-type DNA-binding domain containing protein, expressed,LOC_Os03g53340.2 | HSF-type DNA-binding domain containing protein, expressed,LOC_Os03g53340.1 | HSF-type DNA-binding domain containing protein, expressed		N/A		0	0	0	0	0	2	0	1	0	0	0	0	0	0	1	1	0	0
Bradi1g08680	AT3G22845.1 | emp24/gp25L/p24 family/GOLD family protein		LOC_Os03g53310.1 | emp24/gp25L/p24 family protein, putative, expressed		N/A		0	0	0	1	0	0	0	0	0	0	0	0	1	0	0	0	1	0
Bradi1g08690	AT1G62250.1 |		LOC_Os03g53300.2 | expressed protein,LOC_Os03g53300.1 | expressed protein		N/A		1	1	1	0	0	1	0	0	0	0	0	0	0	0	0	0	0	2
Bradi1g08697	AT1G03060.1 | Beige/BEACH domain ;WD domain, G-beta repeat protein		LOC_Os03g53280.1 | WD domain containing protein, putative, expressed		N/A		0	0	0	0	0	1	0	0	0	0	0	0	0	2	0	0	0	2
Bradi1g08703	AT5G43830.1 | Aluminium induced protein with YGL and LRDR motifs		LOC_Os03g53270.1 | stem-specific protein TSJT1, putative, expressed		N/A		0	0	0	0	1	0	0	0	0	0	0	0	0	0	0	0	0	0
Bradi1g08710	AT1G17680.2 | tetratricopeptide repeat (TPR)-containing protein		LOC_Os11g16540.1 | tetratricopeptide repeat domain containing protein, expressed		N/A		0	1	1	0	0	0	0	0	0	0	0	0	1	0	0	0	0	0
Bradi1g08718	AT2G31290.2 | Ubiquitin carboxyl-terminal hydrolase family protein		LOC_Os06g15550.1 | ubiquitin carboxyl-terminal hydrolase, family 1, putative, expressed		N/A		0	0	0	0	0	1	0	0	1	0	0	0	0	2	0	0	0	0
Bradi1g08727	AT5G61412.1 |		LOC_Os06g49290.1 | acanthoscurrin-1 precursor, putative, expressed		N/A		0	1	0	1	0	0	0	0	0	0	0	0	0	0	0	0	0	0
Bradi1g08740	AT1G04210.1 | Leucine-rich repeat protein kinase family protein		LOC_Os03g53250.1 | expressed protein		N/A		0	0	0	0	4	1	2	0	3	0	0	0	0	0	1	3	0	0
Bradi1g08745	No hits found		No hits found		N/A		0	0	0	0	1	2	2	0	3	0	0	0	0	1	1	16	0	0
Bradi1g08750	AT2G37710.1 | receptor lectin kinase		LOC_Os07g03830.1 | lectin-like receptor kinase, putative, expressed		N/A		0	1	0	0	0	2	1	0	0	0	0	0	0	0	1	13	1	0
Bradi1g08760	AT2G37710.1 | receptor lectin kinase		LOC_Os07g18240.1 | lectin-like receptor kinase, putative, expressed		N/A		0	0	0	0	0	0	0	0	0	0	0	0	3	2	1	2	0	0
Bradi1g08772	AT1G66650.1 | Protein with RING/U-box and TRAF-like domains		LOC_Os01g03190.1 | expressed protein		N/A		0	0	0	0	1	1	0	0	0	0	0	0	0	1	1	1	0	0
Bradi1g08780	No hits found		No hits found		N/A		0	1	0	0	0	1	0	0	1	0	0	0	0	0	0	0	1	0
Bradi1g08790	AT5G43780.1 | Pseudouridine synthase/archaeosine transglycosylase-like family protein		LOC_Os03g53230.1 | bifunctional 3-phosphoadenosine 5-phosphosulfate synthetase, putative, expressed		N/A		0	0	0	0	0	4	0	0	0	0	0	0	1	0	0	0	2	0
Bradi1g08800	AT1G66410.1 | calmodulin 4		LOC_Os03g53200.1 | OsCML4 - Calmodulin-related calcium sensor protein, expressed		N/A		0	1	0	0	1	0	0	0	1	0	0	0	0	0	1	6	0	2
Bradi1g08810	No hits found		No hits found		N/A		0	1	0	0	0	0	1	0	0	0	0	0	1	1	1	2	0	0
Bradi1g08820	AT3G54560.1 | histone H2A 11		LOC_Os03g53190.1 | Core histone H2A/H2B/H3/H4 domain containing protein, putative, expressed		N/A		0	0	0	1	1	0	0	0	2	0	0	0	0	0	0	0	0	0
Bradi1g08830	AT3G04750.1 | Tetratricopeptide repeat (TPR)-like superfamily protein		LOC_Os03g53170.1 | pentatricopeptide, putative, expressed		N/A		0	0	0	0	0	1	2	0	2	0	0	0	1	0	1	1	0	0
Bradi1g08840	AT4G14550.1 | indole-3-acetic acid inducible 14		LOC_Os03g53150.1 | OsIAA13 - Auxin-responsive Aux/IAA gene family member, expressed		N/A		0	0	0	1	1	0	0	0	0	1	0	0	1	0	1	4	0	0
Bradi1g08847	AT5G43670.1 | Sec23/Sec24 protein transport family protein		LOC_Os03g53140.3 | protein transport protein Sec23B, putative, expressed		N/A		0	1	1	0	0	0	0	0	0	0	0	0	0	0	1	1	0	0
Bradi1g08860	AT3G54360.1 | zinc ion binding		LOC_Os02g55200.1 | expressed protein,LOC_Os02g55200.2 | expressed protein		N/A		0	0	0	0	0	1	0	0	0	1	0	0	2	0	1	3	1	0
Bradi1g08865	AT5G64560.1 | magnesium transporter 9		LOC_Os03g53110.1 | CorA-like magnesium transporter protein, putative, expressed		N/A		0	0	0	0	0	0	0	0	0	0	0	0	0	0	1	1	0	0
Bradi1g08870	AT5G26594.1 | response regulator 24		LOC_Os03g53100.1 | response regulator receiver domain containing protein, expressed		N/A		0	0	0	1	1	1	0	0	2	0	0	0	0	0	1	2	0	0
Bradi1g08871	No hits found		No hits found		N/A		0	0	0	0	0	0	0	0	1	0	0	0	1	0	1	3	0	0
Bradi1g08872	No hits found		No hits found		N/A		0	1	0	2	0	1	0	0	0	0	0	0	1	1	1	1	0	1
Bradi1g08873	No hits found		LOC_Os03g53080.1 | zinc finger, C3HC4 type domain containing protein, expressed		N/A		0	0	0	0	0	0	0	0	1	0	0	0	1	1	0	0	0	0
Bradi1g08875	AT2G30580.1 | DREB2A-interacting protein 2		LOC_Os03g53080.1 | zinc finger, C3HC4 type domain containing protein, expressed		N/A		0	0	0	0	0	1	0	0	2	1	0	0	2	2	0	0	0	0
Bradi1g08880	AT2G38360.1 | prenylated RAB acceptor 1.B4		LOC_Os03g53070.1 | prenylated rab acceptor, putative, expressed		N/A		0	0	0	2	0	0	0	0	0	0	0	0	2	1	0	0	1	0
Bradi1g08891	AT3G26330.1 | cytochrome P450, family 71, subfamily B, polypeptide 37		LOC_Os09g10340.1 | cytochrome P450, putative, expressed		HSF		0	0	0	1	0	0	0	0	0	0	0	0	1	0	1	1	0	0
Bradi1g08900	AT3G04670.1 | WRKY DNA-binding protein 39		LOC_Os03g53050.1 | WRKY121, expressed		N/A		1	0	0	0	0	3	0	1	1	0	0	0	0	0	0	0	0	0
Bradi1g08907	No hits found		No hits found		N/A		0	1	0	1	1	0	1	0	0	0	0	0	0	1	0	0	3	1
Bradi1g08917	AT1G56290.1 | CwfJ-like family protein		LOC_Os03g52980.1 | CWF19-like 2, cell cycle control, putative, expressed		N/A		0	0	0	0	0	0	0	0	0	0	0	0	1	0	0	0	1	0
Bradi1g08930	AT5G43650.1 | basic helix-loop-helix (bHLH) DNA-binding superfamily protein		LOC_Os03g53020.1 | helix-loop-helix DNA-binding domain containing protein, expressed		N/A		0	1	1	0	0	1	0	0	0	1	0	0	2	2	1	1	1	0
Bradi1g08940	AT3G23100.1 | homolog of human DNA ligase iv-binding protein XRCC4,AT3G23100.2 | homolog of human DNA ligase iv-binding protein XRCC4		LOC_Os03g53000.1 | XRCC4, putative, expressed		N/A		0	0	0	0	0	0	0	0	0	0	0	0	0	0	1	9	0	0
Bradi1g08950	AT1G56290.1 | CwfJ-like family protein		LOC_Os03g52980.1 | CWF19-like 2, cell cycle control, putative, expressed		N/A		1	1	0	0	0	0	0	0	2	0	0	0	0	0	1	1	0	0
Bradi1g08960	AT5G05920.1 | deoxyhypusine synthase		LOC_Os03g52970.1 | deoxyhypusine synthase, putative, expressed		N/A		0	0	0	2	0	0	0	0	0	0	0	0	0	0	0	0	0	0
Bradi1g08977	No hits found		No hits found		N/A		0	0	0	1	0	0	0	0	2	0	0	0	0	1	0	0	1	1
Bradi1g08982	AT5G66580.1 |		LOC_Os03g52940.1 | expressed protein		N/A		0	1	0	0	1	0	0	0	0	0	0	1	1	2	1	7	0	0
Bradi1g08988	No hits found		LOC_Os06g50280.1 | OsFBL31 - F-box domain and LRR containing protein, expressed		N/A		0	0	0	0	0	0	0	0	0	0	0	0	1	0	1	1	1	0
Bradi1g09000	AT5G42655.1 | Disease resistance-responsive (dirigent-like protein) family protein		LOC_Os03g52920.1 | expressed protein		N/A		0	0	0	1	0	0	0	0	1	1	0	0	0	1	0	0	1	0
Bradi1g09010	AT4G19390.1 | Uncharacterised protein family (UPF0114)		LOC_Os03g52910.1 | uncharacterized UPF0114 domain containing protein, expressed		N/A		0	0	0	2	0	1	1	0	0	0	0	0	0	0	1	1	0	0
Bradi1g09020	No hits found		LOC_Os01g50230.1 | expressed protein		N/A		1	0	0	1	0	1	0	0	0	0	0	0	1	0	1	1	0	0
Bradi1g09030	AT5G66560.1 | Phototropic-responsive NPH3 family protein		LOC_Os03g52880.1 | BTBN9 - Bric-a-Brac, Tramtrack, Broad Complex BTB domain with non-phototropic hypocotyl 3 NPH3 and coiled-coil domains, expressed		N/A		0	0	0	1	0	0	0	0	0	0	0	0	0	0	0	0	2	0
Bradi1g09042	AT2G26490.1 | Transducin/WD40 repeat-like superfamily protein		LOC_Os03g52870.1 | WD-40 repeat family protein, putative, expressed		N/A		0	1	0	0	0	0	0	0	1	0	0	0	0	1	1	1	0	0
Bradi1g09050	AT3G22400.1 | PLAT/LH2 domain-containing lipoxygenase family protein		LOC_Os03g52860.1 | lipoxygenase, putative, expressed		N/A		0	0	0	0	0	0	0	0	0	0	0	0	0	0	0	0	1	0
Bradi1g09065	AT1G55020.1 | lipoxygenase 1		LOC_Os03g52860.1 | lipoxygenase, putative, expressed		N/A		0	0	0	0	1	0	0	0	1	0	0	0	0	0	1	3	0	0
Bradi1g09080	AT3G50840.1 | Phototropic-responsive NPH3 family protein		LOC_Os03g52880.1 | BTBN9 - Bric-a-Brac, Tramtrack, Broad Complex BTB domain with non-phototropic hypocotyl 3 NPH3 and coiled-coil domains, expressed		N/A		0	0	0	0	0	1	0	0	1	0	0	0	0	0	1	3	0	1
Bradi1g09090	No hits found		LOC_Os01g40750.1 | expressed protein		N/A		0	0	0	0	0	1	0	1	1	1	0	0	1	0	0	0	0	0
Bradi1g09100	AT4G37930.1 | serine transhydroxymethyltransferase 1		LOC_Os03g52840.1 | serine hydroxymethyltransferase, mitochondrial precursor, putative, expressed		N/A		0	0	0	2	0	0	0	0	0	0	0	0	0	1	0	0	0	0
Bradi1g09110	AT1G50030.1 | target of rapamycin		LOC_Os03g52794.1 | phosphatidylinositol kinase, putative, expressed		N/A		0	0	0	0	0	0	0	0	0	0	0	0	0	2	1	2	0	0
Bradi1g09120	AT4G21520.1 | Transducin/WD40 repeat-like superfamily protein		LOC_Os03g52794.1 | phosphatidylinositol kinase, putative, expressed		N/A		0	1	1	1	1	0	0	0	1	0	0	0	0	1	1	1	0	0
Bradi1g09130	AT2G15860.1 |		LOC_Os03g52780.1 | expressed protein		N/A		0	1	0	0	1	3	0	0	1	0	0	0	0	0	1	2	0	0
Bradi1g09133	AT4G02030.1 | Vps51/Vps67 family (components of vesicular transport) protein		LOC_Os03g52770.1 | expressed protein		N/A		0	0	0	3	0	0	0	0	0	0	0	0	0	0	0	0	0	2
Bradi1g09134	AT5G58730.1 | pfkB-like carbohydrate kinase family protein		LOC_Os03g52760.1 | kinase, pfkB family, putative, expressed		N/A		0	0	0	1	1	1	0	0	0	0	0	0	0	0	1	2	0	0
Bradi1g09136	AT5G27620.1 | cyclin H;1		LOC_Os03g52750.1 | cyclin, putative, expressed,LOC_Os03g52750.2 | cyclin, putative, expressed		N/A		0	0	0	0	0	1	0	0	0	0	0	0	0	0	1	1	2	0
Bradi1g09140	AT4G31850.1 | proton gradient regulation 3		LOC_Os10g28600.1 | PPR repeat domain containing protein, putative, expressed		N/A		0	0	0	2	0	0	0	0	0	0	0	0	0	0	0	0	0	0
Bradi1g09150	AT2G14110.1 | Haloacid dehalogenase-like hydrolase (HAD) superfamily protein		LOC_Os03g52730.1 | magnesium-dependent phosphatase 1, putative, expressed		N/A		0	0	0	1	1	0	0	1	0	0	0	0	2	0	0	0	1	0
Bradi1g09160	No hits found		No hits found		N/A		0	1	0	2	1	1	0	0	3	0	0	0	0	0	1	2	0	0
Bradi1g09170	AT2G39810.1 | ubiquitin-protein ligases		LOC_Os03g52700.1 | expressed protein		WRKY		0	0	0	0	0	0	0	0	1	0	0	0	0	0	1	1	0	0
Bradi1g09171	AT5G10860.1 | Cystathionine beta-synthase (CBS) family protein		LOC_Os03g52690.3 | CBS domain containing membrane protein, putative, expressed		N/A		0	1	1	0	0	0	0	0	1	0	0	0	0	1	0	0	1	0
Bradi1g09173	AT5G05250.1 |		LOC_Os03g52680.1 | expressed protein		N/A		0	0	0	1	0	1	0	0	0	0	0	0	0	0	1	1	0	0
Bradi1g09177	No hits found		No hits found		bHLH		0	0	0	2	1	0	0	0	1	0	0	0	0	0	0	0	0	0
Bradi1g09187	AT1G28200.1 | FH interacting protein 1		LOC_Os03g52670.1 | GRAM domain containing protein, expressed		N/A		0	0	0	0	0	0	0	0	2	0	0	0	0	1	1	1	0	0
Bradi1g09200	AT4G09650.1 | ATP synthase delta-subunit gene		LOC_Os03g52660.1 | ATP synthase F1, delta subunit family protein, putative, expressed		N/A		0	2	0	0	0	0	0	0	1	0	0	0	1	1	0	0	0	0
Bradi1g09210	AT1G08560.1 | syntaxin of plants 111		LOC_Os03g52650.1 | syntaxin-related protein, putative, expressed		N/A		0	1	0	0	0	1	0	0	0	0	0	0	0	0	1	3	0	0
Bradi1g09216	AT3G28460.1 | methyltransferases		LOC_Os03g52640.2 | expressed protein		N/A		0	0	0	0	0	0	1	0	0	0	0	0	0	1	1	20	0	0
Bradi1g09220	No hits found		No hits found		N/A		0	0	0	0	0	0	0	1	1	0	0	0	0	0	1	1	0	1
Bradi1g09225	AT5G49720.1 | glycosyl hydrolase 9A1		LOC_Os03g52630.1 | endoglucanase, putative, expressed		N/A		0	0	0	1	1	0	0	0	1	0	0	0	0	0	1	1	0	0
Bradi1g09230	AT1G77405.1 | Pentatricopeptide repeat (PPR) superfamily protein		LOC_Os03g52620.1 | expressed protein		N/A		0	0	0	0	0	0	0	0	0	0	0	0	0	1	1	1	1	0
Bradi1g09240	AT2G38110.1 | glycerol-3-phosphate acyltransferase 6		LOC_Os03g52570.1 | glycerol-3-phosphate acyltransferase, putative, expressed		N/A		0	0	0	0	1	1	0	0	1	0	0	0	0	0	1	2	0	0
Bradi1g09243	AT2G38870.1 | Serine protease inhibitor, potato inhibitor I-type family protein		LOC_Os08g34258.1 | inhibitor I family protein, putative, expressed		N/A		0	0	0	0	0	0	0	0	0	0	0	0	5	0	1	3	0	0
Bradi1g09246	AT3G52600.1 | cell wall invertase 2		LOC_Os04g33720.1 | glycosyl hydrolases, putative, expressed		N/A		0	1	0	2	0	1	0	0	1	0	0	0	1	0	1	3	1	1
Bradi1g09250	AT3G07030.1 | Alba DNA/RNA-binding protein		LOC_Os03g52490.1 | nucleic acid binding protein, putative, expressed		N/A		0	0	0	2	0	0	0	0	0	0	0	0	0	0	1	2	0	0
Bradi1g09260	No hits found		No hits found		N/A		0	0	0	0	0	0	0	0	0	0	0	0	0	1	1	2	0	0
Bradi1g09270	AT3G28640.1 | Tetratricopeptide repeat (TPR)-like superfamily protein		LOC_Os03g52475.1 | pentatricopeptide, putative, expressed		N/A		0	0	0	1	1	0	5	0	3	0	0	0	0	1	1	8	0	0
Bradi1g09280	AT4G07410.1 | Transducin family protein / WD-40 repeat family protein		LOC_Os03g52470.1 | WD domain, G-beta repeat domain containing protein, expressed		N/A		0	0	0	2	0	1	0	1	0	0	0	0	0	0	0	0	0	0
Bradi1g09290	AT5G19220.1 | ADP glucose pyrophosphorylase large subunit 1		LOC_Os03g52460.1 | glucose-1-phosphate adenylyltransferase large subunit, putative, expressed		N/A		0	1	0	0	0	0	0	1	0	0	0	0	0	0	1	3	0	0
Bradi1g09300	AT1G51600.2 | ZIM-LIKE 2		LOC_Os03g52450.1 | GATA transcription factor 25, putative, expressed,LOC_Os03g52450.2 | GATA transcription factor 25, putative, expressed		N/A		0	0	0	0	0	0	0	1	2	0	0	0	0	0	0	0	0	0
Bradi1g09310	AT5G66380.1 | folate transporter 1		LOC_Os03g52430.1 | mitochondrial carrier protein, putative, expressed		N/A		0	0	0	1	0	0	0	0	0	0	0	0	0	0	0	0	0	0
Bradi1g09320	AT3G57450.1 |		LOC_Os03g52410.1 | expressed protein		N/A		2	1	1	0	1	0	0	0	1	0	0	0	1	0	1	4	0	0
Bradi1g09327	AT4G36420.1 | Ribosomal protein L12 family protein		LOC_Os03g52400.1 | ribosomal protein L7/L12 C-terminal domain containing protein, expressed		N/A		0	0	0	0	1	0	0	0	1	0	0	0	0	0	1	3	0	0
Bradi1g09340	AT1G72060.1 | serine-type endopeptidase inhibitors		LOC_Os03g52390.1 | PIII1 - Proteinase inhibitor II family protein precursor, expressed		N/A		0	0	0	1	0	0	0	0	1	0	0	0	1	0	0	0	2	0
Bradi1g09350	AT2G16430.2 | purple acid phosphatase 10		LOC_Os12g44010.1 | purple acid phosphatase precursor, putative, expressed		N/A		0	0	0	1	0	0	0	0	0	0	1	0	1	0	0	0	0	0
Bradi1g09357	No hits found		LOC_Os03g52370.2 | PIII4 - Proteinase inhibitor II family protein precursor, expressed		N/A		0	1	0	0	0	1	0	0	0	0	0	0	3	1	1	2	0	0
Bradi1g09369	No hits found		LOC_Os03g52380.1 | PIII5 - Proteinase inhibitor II family protein precursor, expressed		N/A		0	1	1	1	0	0	0	0	0	0	0	0	0	0	1	3	0	0
Bradi1g09370	AT3G19360.1 | Zinc finger (CCCH-type) family protein		LOC_Os01g07930.1 | zinc finger C-x8-C-x5-C-x3-H type family protein, expressed		N/A		0	0	0	1	0	0	0	0	2	0	0	0	2	0	1	1	0	1
Bradi1g09382	No hits found		No hits found		N/A		0	1	0	0	2	0	0	1	0	0	0	0	0	2	1	2	0	0
Bradi1g09390	No hits found		No hits found		N/A		0	0	0	0	2	0	0	0	1	0	0	0	0	1	1	2	0	0
Bradi1g09400	No hits found		No hits found		N/A		0	0	0	0	0	0	0	0	1	0	0	0	0	0	1	3	0	0
Bradi1g09410	AT4G36870.1 | BEL1-like homeodomain 2,AT2G23760.2 | BEL1-like homeodomain 4,AT4G36870.2 | BEL1-like homeodomain 2		LOC_Os03g52239.1 | homeobox domain containing protein, expressed		N/A		0	2	0	0	1	2	1	0	1	0	0	0	1	0	1	10	0	0
Bradi1g09415	AT5G14105.1 |		LOC_Os05g44160.1 | expressed protein		N/A		1	1	0	0	0	0	1	0	2	0	0	0	1	0	1	17	0	0
Bradi1g09420	No hits found		No hits found		N/A		0	0	0	0	0	0	0	0	0	0	0	0	0	0	1	2	0	0
Bradi1g09431	AT5G66590.1 | CAP (Cysteine-rich secretory proteins, Antigen 5, and Pathogenesis-related 1 protein) superfamily protein		LOC_Os03g52300.1 | SCP-like extracellular protein, expressed		N/A		0	0	0	2	1	1	1	0	1	0	0	0	0	0	1	5	0	0
Bradi1g09440	AT5G28640.1 | SSXT family protein		LOC_Os03g52320.1 | GRF-interacting factor 1, putative, expressed		N/A		0	0	0	2	0	2	0	0	0	0	0	0	1	3	0	0	0	0
Bradi1g09450	AT1G72280.1 | endoplasmic reticulum oxidoreductins 1		LOC_Os03g52340.1 | endoplasmic oxidoreductin-1 precursor, putative, expressed		N/A		0	0	0	0	0	0	0	0	0	0	0	0	0	2	0	0	0	0
Bradi1g09455	AT5G57550.1 | xyloglucan endotransglucosylase/hydrolase 25		LOC_Os08g13920.1 | glycosyl hydrolases family 16, putative, expressed		N/A		0	3	0	0	1	0	1	0	3	0	0	0	0	0	1	2	0	0
Bradi1g09460	AT5G57550.1 | xyloglucan endotransglucosylase/hydrolase 25		LOC_Os08g13920.1 | glycosyl hydrolases family 16, putative, expressed		N/A		0	0	0	0	0	0	0	0	2	2	0	0	2	0	1	2	0	0
Bradi1g09470	AT4G34350.1 | 4-hydroxy-3-methylbut-2-enyl diphosphate reductase		LOC_Os03g52170.1 | 4-hydroxy-3-methylbut-2-enyl diphosphate reductase, putative, expressed		N/A		0	1	1	0	0	1	1	0	0	0	0	0	0	0	1	1	1	0
Bradi1g09480	AT1G28700.1 | Nucleotide-diphospho-sugar transferase family protein		LOC_Os03g52160.1 | regulatory protein, putative, expressed		N/A		0	0	0	0	0	1	0	0	0	0	0	0	1	0	1	2	0	0
Bradi1g09487	AT1G02305.1 | Cysteine proteinases superfamily protein		LOC_Os05g24550.5 | Papain family cysteine protease domain containing protein, expressed		N/A		0	1	0	2	0	0	0	0	2	0	0	0	1	0	1	2	0	1
Bradi1g09500	AT1G02305.1 | Cysteine proteinases superfamily protein		LOC_Os05g24550.6 | Papain family cysteine protease domain containing protein, expressed		N/A		0	1	1	0	0	1	0	0	0	0	0	0	0	0	1	3	0	0
Bradi1g09507	AT5G42620.2 | metalloendopeptidases;zinc ion binding		LOC_Os03g52150.1 | metalloendopeptidase/ metallopeptidase/ zinc ion binding protein, putative, expressed		N/A		0	0	0	0	0	0	0	0	2	0	0	0	0	0	1	2	0	0
Bradi1g09513	AT1G49975.1 |		LOC_Os03g52130.1 | expressed protein		N/A		0	0	0	0	0	1	0	0	1	0	0	0	0	0	1	14	0	0
Bradi1g09520	AT5G11730.1 | Core-2/I-branching beta-1,6-N-acetylglucosaminyltransferase family protein		LOC_Os03g52120.1 | DNA binding protein, putative, expressed		N/A		0	0	0	0	0	0	0	0	4	0	0	0	0	0	1	3	0	0
Bradi1g09530	No hits found		No hits found		N/A		0	0	0	0	1	0	0	0	1	0	0	0	2	0	0	0	1	0
Bradi1g09537	No hits found		No hits found		N/A		0	1	0	0	0	0	0	2	0	0	0	0	1	0	1	1	0	0
Bradi1g09550	AT4G22758.1 |		LOC_Os02g25080.1 | expressed protein		GATA		0	0	0	0	1	1	0	0	1	0	0	0	2	0	0	0	2	0
Bradi1g09560	AT1G49975.1 |		LOC_Os03g52130.1 | expressed protein		N/A		0	1	0	0	0	0	0	0	0	0	0	0	1	1	0	0	0	0
Bradi1g09570	AT5G11730.1 | Core-2/I-branching beta-1,6-N-acetylglucosaminyltransferase family protein		LOC_Os03g52120.1 | DNA binding protein, putative, expressed		N/A		0	2	1	0	1	0	1	0	0	0	0	0	0	0	1	2	0	0
Bradi1g09577	AT1G10130.1 | endoplasmic reticulum-type calcium-transporting ATPase 3		LOC_Os03g52090.1 | calcium-transporting ATPase 3, endoplasmic reticulum-type, putative, expressed		N/A		2	0	0	0	0	0	1	0	0	0	0	0	0	1	1	5	0	0
Bradi1g09583	AT2G22970.2 | serine carboxypeptidase-like 11		LOC_Os02g46260.1 | OsSCP9 - Putative Serine Carboxypeptidase homologue, expressed		N/A		0	0	0	0	0	0	0	1	0	0	0	0	0	1	1	1	1	0
Bradi1g09590	AT2G23010.1 | serine carboxypeptidase-like 9		LOC_Os12g39170.1 | OsSCP66 - Putative Serine Carboxypeptidase homologue, expressed		N/A		0	0	0	0	0	1	0	0	0	0	0	0	0	1	1	1	0	0
Bradi1g09600	AT5G09640.1 | serine carboxypeptidase-like 19		LOC_Os03g52040.2 | OsSCP19 - Putative Serine Carboxypeptidase homologue, expressed		N/A		0	2	1	0	0	0	1	0	1	0	0	0	1	0	1	2	1	0
Bradi1g09603	No hits found		LOC_Os03g52020.1 | expressed protein		N/A		0	1	1	0	0	0	0	0	0	0	0	0	0	0	0	0	0	0
Bradi1g09606	No hits found		LOC_Os02g06100.1 | expressed protein		C3H		0	1	1	0	0	0	0	0	0	1	0	0	1	0	0	0	0	0
Bradi1g09609	AT1G27480.1 | alpha/beta-Hydrolases superfamily protein		LOC_Os03g52010.1 | lecithin cholesterol acyltransferase, putative, expressed		N/A		0	0	0	1	0	0	0	0	0	0	0	0	0	0	1	3	3	0
Bradi1g09611	AT3G49800.1 | BSD domain-containing protein		LOC_Os03g52000.1 | BSD domain containing protein, expressed		N/A		0	1	0	2	0	1	0	0	0	0	0	0	3	0	1	3	0	0
Bradi1g09613	AT1G76990.3 | ACT domain repeat 3		LOC_Os03g51990.1 | ACT domain containing protein, expressed		N/A		0	1	0	0	0	2	0	0	0	0	0	0	1	0	1	2	0	1
Bradi1g09615	AT1G50000.1 | methyltransferases		LOC_Os03g51984.1 | differentiation protein, putative, expressed		TALE		0	0	0	1	0	0	0	0	1	0	0	0	0	0	0	0	0	0
Bradi1g09630	AT3G02875.1 | Peptidase M20/M25/M40 family protein		LOC_Os03g62070.1 | hydrolase, putative, expressed		N/A		0	0	0	0	0	0	0	0	0	0	0	0	2	4	0	0	0	0
Bradi1g09633	No hits found		LOC_Os03g51980.1 | expressed protein		N/A		1	0	0	0	0	1	0	0	4	0	0	0	1	0	1	6	1	0
Bradi1g09637	AT2G22840.1 | growth-regulating factor 1		LOC_Os03g51970.1 | growth-regulating factor, putative, expressed		N/A		0	0	0	0	0	0	0	0	2	1	0	0	1	0	1	2	0	0
Bradi1g09670	AT5G65840.1 | Thioredoxin superfamily protein		LOC_Os03g51960.1 | expressed protein		N/A		0	0	0	0	0	1	0	0	1	0	0	0	3	0	1	2	0	1
Bradi1g09680	AT1G19630.1 | cytochrome P450, family 722, subfamily A, polypeptide 1		LOC_Os05g01120.1 | cytochrome P450, putative, expressed		N/A		0	0	0	1	0	1	1	0	1	0	0	0	0	1	1	1	0	0
Bradi1g09690	AT5G65840.1 | Thioredoxin superfamily protein		LOC_Os03g51950.1 | expressed protein		N/A		0	1	1	0	0	0	0	1	0	0	0	0	1	1	0	0	0	0
Bradi1g09700	AT1G44920.1 |		LOC_Os03g51930.2 | expressed protein		N/A		0	0	0	1	1	1	0	0	0	0	0	0	0	1	0	0	0	0
Bradi1g09710	AT1G17870.1 | ethylene-dependent gravitropism-deficient and yellow-green-like 3		LOC_Os03g51920.1 | peptidase, M50 family, putative, expressed		N/A		0	0	0	2	2	2	1	0	3	0	0	0	0	1	1	1	0	0
Bradi1g09720	AT1G10120.1 | basic helix-loop-helix (bHLH) DNA-binding superfamily protein		LOC_Os03g51910.1 | basic helix-loop-helix protein, putative, expressed		N/A		0	0	0	1	0	0	0	0	0	2	0	0	0	0	1	3	0	0
Bradi1g09729	AT4G34910.1 | P-loop containing nucleoside triphosphate hydrolases superfamily protein		LOC_Os03g51900.1 | DEAD-box ATP-dependent RNA helicase, putative, expressed		N/A		0	0	0	0	0	0	0	0	0	0	0	0	0	0	1	6	0	0
Bradi1g09737	AT3G12210.2 | DNA binding		LOC_Os03g51880.1 | GA15368-PA, putative, expressed		N/A		0	0	0	0	0	0	0	0	1	0	0	0	1	1	0	0	0	0
Bradi1g09750	AT3G49730.1 | Tetratricopeptide repeat (TPR)-like superfamily protein		LOC_Os03g51840.1 | PPR repeat containing protein, expressed		N/A		0	1	1	1	1	1	0	0	1	0	0	0	1	2	1	4	0	0
Bradi1g09760	AT4G07990.1 | Chaperone DnaJ-domain superfamily protein		LOC_Os03g51830.1 | heat shock protein DnaJ, putative, expressed		N/A		0	0	0	0	0	0	0	0	0	0	0	0	0	0	0	0	0	0
Bradi1g09770	AT3G49725.1 | GTP-binding protein, HflX		LOC_Os03g51790.1 | GTPase of unknown function domain containing protein, putative, expressed		N/A		0	0	0	0	0	0	0	0	0	0	0	0	1	3	1	1	0	0
Bradi1g09774	AT3G61590.1 | Galactose oxidase/kelch repeat superfamily protein		LOC_Os03g51760.1 | OsFBX109 - F-box domain containing protein, expressed		N/A		0	0	0	0	1	0	0	1	0	0	0	0	0	0	0	0	0	0
Bradi1g09777	No hits found		No hits found		N/A		0	0	0	0	1	0	0	0	1	0	0	0	0	0	1	3	0	0
Bradi1g09780	AT4G37770.1 | 1-amino-cyclopropane-1-carboxylate synthase 8,AT2G22810.1 | 1-aminocyclopropane-1-carboxylate synthase 4		LOC_Os03g51740.1 | aminotransferase, classes I and II, domain containing protein, expressed		N/A		0	0	0	1	0	2	0	0	1	1	0	1	1	1	0	0	0	0
Bradi1g09790	AT5G66290.1 |		LOC_Os03g51700.1 | expressed protein		N/A		0	0	0	0	0	1	0	0	0	0	0	0	0	0	0	0	0	0
Bradi1g09800	AT4G08150.1 | KNOTTED-like from Arabidopsis thaliana		LOC_Os03g51690.1 | Homeobox domain containing protein, expressed		N/A		0	0	0	0	0	0	0	0	1	0	0	0	2	1	1	1	1	0
Bradi1g09810	AT5G65740.2 | zinc ion binding		LOC_Os03g51680.2 | fanconi anemia L, putative, expressed		N/A		0	0	0	0	0	0	0	0	1	0	1	0	0	0	0	0	0	0
Bradi1g09814	AT1G10040.1 | alpha/beta-Hydrolases superfamily protein		LOC_Os03g51670.1 | serine esterase family protein, putative, expressed		N/A		0	1	0	1	0	0	1	0	1	0	0	0	0	0	1	2	0	0
Bradi1g09816	AT4G37810.1 |		LOC_Os03g51660.1 | expressed protein		N/A		0	1	1	0	0	1	0	0	0	0	0	0	0	1	1	4	2	0
Bradi1g09820	AT2G13650.1 | golgi nucleotide sugar transporter 1		LOC_Os08g01610.3 | DUF250 domain containing protein, putative, expressed		N/A		0	1	0	1	0	0	0	0	0	0	0	0	0	1	1	1	0	0
Bradi1g09830	AT1G19025.1 | DNA repair metallo-beta-lactamase family protein		LOC_Os08g01630.1 | DNA repair metallo-beta-lactamase, putative, expressed		N/A		0	0	0	1	0	2	0	1	1	0	0	0	1	0	1	8	0	1
Bradi1g09835	AT2G36630.1 | Sulfite exporter TauE/SafE family protein		LOC_Os03g51650.1 | membrane protein, putative, expressed		N/A		0	1	0	0	0	0	0	0	4	0	0	0	2	2	1	6	0	1
Bradi1g09840	AT2G22795.1 |		LOC_Os03g51640.1 | expressed protein		N/A		0	0	0	0	0	0	0	0	0	0	0	0	1	0	0	0	0	0
Bradi1g09847	AT1G58520.1 | lipases;hydrolases, acting on ester bonds		LOC_Os03g51620.1 | DUF221 domain containing protein, expressed		N/A		0	0	0	0	0	0	0	0	2	0	0	0	1	1	0	0	1	0
Bradi1g09860	AT4G08170.2 | Inositol 1,3,4-trisphosphate 5/6-kinase family protein		LOC_Os03g51610.1 | Inositol 1, 3, 4-trisphosphate 5/6-kinase, putative, expressed		N/A		0	0	0	0	3	0	1	0	1	0	0	0	1	1	1	3	0	0
Bradi1g09870	AT4G14960.2 | Tubulin/FtsZ family protein		LOC_Os11g14220.1 | tubulin/FtsZ domain containing protein, putative, expressed		N/A		0	0	0	1	0	0	0	1	2	0	0	0	0	2	0	0	0	0
Bradi1g09877	AT5G05800.1 |		LOC_Os04g38960.1 | expressed protein		N/A		0	0	0	0	2	1	1	0	1	0	0	0	1	2	1	1	0	0
Bradi1g09890	AT4G37850.1 | basic helix-loop-helix (bHLH) DNA-binding superfamily protein		LOC_Os03g51580.1 | helix-loop-helix DNA-binding domain containing protein, expressed		N/A		0	0	0	1	1	1	0	0	2	0	0	0	0	0	1	2	1	1
Bradi1g09900	No hits found		No hits found		GRF		0	0	0	1	0	0	0	1	0	1	0	0	1	0	0	0	2	0
Bradi1g09910	AT3G49660.1 | Transducin/WD40 repeat-like superfamily protein		LOC_Os03g51550.3 | WD repeat-containing protein 5, putative, expressed		N/A		0	0	0	0	0	0	1	0	0	0	0	0	0	0	1	4	0	1
Bradi1g09917	AT4G31770.1 | debranching enzyme 1		No hits found		N/A		0	0	0	1	1	1	0	0	5	0	0	0	0	0	1	3	1	1
Bradi1g09930	No hits found		LOC_Os03g51530.1 | expressed protein		N/A		0	0	0	0	0	0	1	0	0	0	0	0	0	0	0	0	0	0
Bradi1g09940	AT5G58040.1 | homolog of yeast FIP1 [V]		LOC_Os03g51520.1 | fip1 motif family protein, expressed		N/A		0	0	0	0	0	0	0	0	1	0	0	0	1	0	0	0	0	0
Bradi1g09950	AT2G18400.1 | ribosomal protein L6 family protein		LOC_Os03g51510.1 | ribosomal protein L6, putative, expressed		N/A		0	0	0	1	0	1	0	0	0	0	0	0	2	0	1	1	0	0
Bradi1g09960	AT5G66550.1 | Maf-like protein		LOC_Os03g51479.2 | maf, putative, expressed		bHLH		0	0	0	0	0	0	0	0	0	0	0	0	0	1	0	0	0	0
Bradi1g09970	AT5G66550.1 | Maf-like protein		LOC_Os03g51479.2 | maf, putative, expressed		N/A		0	1	0	0	0	0	0	0	1	0	0	0	1	0	1	4	0	0
Bradi1g09980	AT3G05570.1 |		LOC_Os03g51459.1 | expressed protein		N/A		0	0	0	0	0	0	0	0	0	0	0	0	0	0	1	3	0	0
Bradi1g09990	AT2G16250.1 | Leucine-rich repeat protein kinase family protein		LOC_Os03g51440.1 | LRR receptor-like protein kinase, putative, expressed		N/A		0	0	0	0	0	0	1	0	0	0	0	0	0	1	1	1	1	0
Bradi1g10000	AT1G75170.2 | Sec14p-like phosphatidylinositol transfer family protein		LOC_Os03g51430.1 | SEC14 cytosolic factor family protein, putative, expressed		N/A		0	0	0	1	0	0	0	1	2	0	1	0	0	0	1	2	1	0
Bradi1g10007	No hits found		LOC_Os02g22440.1 | expressed protein		N/A		0	0	0	1	0	3	0	1	0	1	0	0	1	0	1	2	2	0
Bradi1g10017	No hits found		LOC_Os03g51390.1 | expressed protein		N/A		0	0	0	0	1	1	1	0	0	0	0	0	0	0	1	7	0	0
Bradi1g10023	AT1G63850.1 | BTB/POZ domain-containing protein		LOC_Os03g51380.1 | expressed protein		N/A		0	0	0	1	0	1	0	0	1	0	0	0	0	0	1	2	0	0
Bradi1g10030	AT5G66780.1 |		LOC_Os03g51350.1 | expressed protein		N/A		0	0	0	0	0	0	0	0	1	0	0	0	0	0	1	3	0	2
Bradi1g10040	AT5G55630.2 | Outward rectifying potassium channel protein		LOC_Os07g01810.1 | potassium channel protein, putative, expressed		N/A		0	0	0	1	0	0	0	1	0	1	0	0	1	1	0	0	1	1
Bradi1g10047	AT3G50650.1 | GRAS family transcription factor		LOC_Os03g51330.1 | GRAS family transcription factor domain containing protein, expressed		TALE		0	0	0	0	0	0	0	0	0	0	0	0	0	2	1	3	0	1
Bradi1g10058	AT4G34490.1 | cyclase associated protein 1		LOC_Os03g51250.1 | adenylyl cyclase-associated protein, putative, expressed		N/A		0	0	0	0	0	0	0	0	1	0	1	0	1	0	1	2	0	0
Bradi1g10070	AT4G34480.1 | O-Glycosyl hydrolases family 17 protein		LOC_Os03g51240.3 | glycosyl hydrolases family 17, putative, expressed,LOC_Os03g51240.2 | glycosyl hydrolases family 17, putative, expressed		N/A		0	1	0	0	0	0	1	0	2	0	0	0	0	0	1	1	0	0
Bradi1g10080	No hits found		LOC_Os12g36360.1 | retrotransposon protein, putative, unclassified, expressed		N/A		0	0	0	2	0	0	0	0	0	0	0	0	0	4	0	0	0	1
Bradi1g10090	AT5G66750.1 | chromatin remodeling 1		LOC_Os09g27060.1 | SNF2 family N-terminal domain containing protein, expressed		N/A		0	0	0	0	0	0	0	2	1	0	0	0	0	1	0	0	0	0
Bradi1g10100	AT4G34430.3 | DNA-binding family protein,AT4G34430.1 | DNA-binding family protein		LOC_Os03g51220.1 | SWI/SNF-related matrix-associated actin-dependent regulator of chromatin subfamily C member, putative, expressed		N/A		0	0	0	0	0	0	0	0	0	0	0	0	0	0	0	0	0	0
Bradi1g10110	AT5G21050.1 |		LOC_Os03g51210.1 | expressed protein		N/A		0	0	0	2	0	0	1	0	1	0	0	0	2	1	0	0	1	0
Bradi1g10120	AT1G54690.1 | gamma histone variant H2AX		LOC_Os03g51200.1 | Core histone H2A/H2B/H3/H4 domain containing protein, putative, expressed		N/A		0	0	0	0	0	0	0	0	0	0	0	0	0	1	1	1	0	0
Bradi1g10130	No hits found		LOC_Os01g06410.1 | expressed protein		N/A		0	0	0	1	2	1	4	0	1	0	0	0	0	0	1	5	0	0
Bradi1g10140	AT1G27100.1 | Actin cross-linking protein		LOC_Os03g51180.1 | expressed protein		N/A		0	0	0	0	0	0	0	0	1	0	0	0	0	2	0	0	0	0
Bradi1g10150	AT5G06660.1 | Protein of unknown function DUF106, transmembrane		LOC_Os03g51160.1 | fb27, putative, expressed,LOC_Os03g51160.2 | fb27, putative, expressed		N/A		0	0	0	2	0	1	0	0	0	0	0	0	1	0	1	1	0	0
Bradi1g10161	No hits found		No hits found		N/A		0	0	0	0	0	1	0	1	0	0	0	0	1	1	0	0	0	0
Bradi1g10170	AT3G45070.1 | P-loop containing nucleoside triphosphate hydrolases superfamily protein		LOC_Os07g41460.1 | sulfotransferase domain containing protein, expressed		bHLH		0	0	0	0	0	0	0	0	2	0	0	0	1	0	0	0	1	0
Bradi1g10175	AT5G43950.1 | Plant protein of unknown function (DUF946)		LOC_Os03g51150.1 | expressed protein		N/A		0	0	0	0	0	0	1	0	0	0	0	0	0	0	0	0	0	0
Bradi1g10180	AT1G64790.1 | ILITYHIA		LOC_Os03g51140.1 | HEAT repeat family protein, putative, expressed		N/A		0	0	0	1	0	1	0	2	1	0	0	0	0	0	0	0	0	0
Bradi1g10190	AT1G17950.1 | myb domain protein 52		LOC_Os03g51110.1 | MYB family transcription factor, putative, expressed		N/A		0	0	0	0	0	0	0	1	1	0	0	0	0	2	0	0	1	0
Bradi1g10200	AT3G06190.1 | BTB-POZ and MATH domain 2		LOC_Os11g40680.1 | MBTB64 - Bric-a-Brac, Tramtrack, Broad Complex BTB domain with Meprin and TRAF Homology MATH domain, expressed		N/A		0	0	0	0	0	1	0	1	0	0	0	0	0	0	1	3	0	0
Bradi1g10210	AT5G17330.1 | glutamate decarboxylase		LOC_Os03g51080.1 | glutamate decarboxylase, putative, expressed		N/A		0	0	0	1	0	0	0	0	0	0	0	0	0	0	0	0	1	0
Bradi1g10220	AT2G02040.1 | peptide transporter 2		LOC_Os03g51050.1 | peptide transporter PTR2, putative, expressed		N/A		0	0	0	0	0	0	0	1	0	0	0	0	0	1	0	0	0	0
Bradi1g10230	AT2G41970.1 | Protein kinase superfamily protein		LOC_Os03g51040.1 | STRUBBELIG-RECEPTOR FAMILY 6 precursor, putative, expressed		N/A		0	0	0	0	0	0	0	0	2	0	0	0	0	0	0	0	0	0
Bradi1g10240	AT1G09570.1 | phytochrome A		LOC_Os03g51030.3 | phytochrome A, putative, expressed		N/A		0	0	0	0	0	0	0	0	1	0	0	0	0	1	1	1	0	1
Bradi1g10250	AT1G09570.1 | phytochrome A		LOC_Os03g51030.1 | phytochrome A, putative, expressed		N/A		0	1	0	0	0	0	0	0	0	0	1	0	0	0	1	1	0	0
Bradi1g10260	No hits found		No hits found		N/A		0	0	0	0	0	3	0	1	3	0	0	0	3	2	1	3	0	1
Bradi1g10270	AT1G73450.1 | Protein kinase superfamily protein		LOC_Os03g51020.1 | expressed protein		N/A		0	0	0	0	0	0	0	0	0	1	0	0	1	0	0	0	0	0
Bradi1g10281	AT1G73480.1 | alpha/beta-Hydrolases superfamily protein		LOC_Os03g51010.1 | hydrolase, alpha/beta fold family domain containing protein, expressed		N/A		0	0	0	4	0	0	0	1	1	0	0	0	1	0	1	5	0	2
Bradi1g10290	AT3G17770.1 | Dihydroxyacetone kinase		LOC_Os03g51000.2 | 3,4-dihydroxy-2-butanone kinase, putative, expressed		N/A		0	0	0	1	2	0	1	0	1	0	0	0	0	0	1	2	0	0
Bradi1g10300	AT2G01910.1 | Microtubule associated protein (MAP65/ASE1) family protein		LOC_Os03g50970.1 | retrotransposon protein, putative, Ty1-copia subclass, expressed		N/A		0	0	0	1	0	0	0	0	0	0	0	0	3	0	1	2	2	0
Bradi1g10310	AT3G09220.1 | laccase 7		LOC_Os11g16260.1 | laccase precursor protein, putative, expressed		N/A		0	2	1	0	1	0	1	1	0	0	1	0	0	2	0	0	2	0
Bradi1g10320	AT4G12530.1 | Bifunctional inhibitor/lipid-transfer protein/seed storage 2S albumin superfamily protein		LOC_Os03g50960.1 | LTPL118 - Protease inhibitor/seed storage/LTP family protein precursor, expressed		N/A		0	0	0	1	2	1	1	2	2	0	0	0	1	0	0	0	0	0
Bradi1g10330	AT1G02410.1 | cytochrome c oxidase assembly protein CtaG / Cox11 family		LOC_Os03g50940.1 | cytochrome c oxidase assembly protein COX11, mitochondrial precursor, putative, expressed		GRAS		0	1	0	1	1	1	0	0	0	0	0	0	0	1	0	0	0	0
Bradi1g10340	AT5G05210.1 | Surfeit locus protein 6		LOC_Os05g30880.1 | nucleolar matrix protein-related, putative, expressed		N/A		0	0	0	0	0	0	0	0	0	0	0	0	0	0	0	0	0	0
Bradi1g10347	No hits found		No hits found		N/A		0	0	0	0	0	1	0	2	0	0	0	0	1	1	1	4	0	0
Bradi1g10353	AT1G75240.1 | homeobox protein 33		LOC_Os03g50920.1 | ZF-HD protein dimerisation region containing protein, expressed		N/A		2	0	0	1	0	0	0	0	0	0	0	0	0	1	1	7	1	0
Bradi1g10360	AT2G33730.1 | P-loop containing nucleoside triphosphate hydrolases superfamily protein		LOC_Os03g50090.1 | transposon protein, putative, CACTA, En/Spm sub-class, expressed		N/A		0	0	0	0	0	1	0	0	0	0	0	0	0	1	1	4	0	0
Bradi1g10370	AT3G12110.1 | actin-11		LOC_Os03g50885.1 | actin, putative, expressed		N/A		0	1	1	1	0	0	0	0	0	0	0	0	0	1	0	0	0	0
Bradi1g10380	No hits found		No hits found		N/A		0	2	1	0	0	0	0	1	1	0	0	0	1	0	1	2	0	1
Bradi1g10390	AT3G17800.1 | Protein of unknown function (DUF760)		LOC_Os03g50870.1 | expressed protein		N/A		0	0	0	1	0	0	0	0	0	0	0	0	0	2	1	3	0	0
Bradi1g10400	AT5G15490.1 | UDP-glucose 6-dehydrogenase family protein		LOC_Os12g25690.1 | UDP-glucose 6-dehydrogenase, putative, expressed		N/A		0	1	0	0	0	0	0	0	0	1	0	0	0	0	0	0	0	0
Bradi1g10410	AT2G01830.2 | CHASE domain containing histidine kinase protein		LOC_Os03g50860.1 | histidine kinase, putative, expressed		N/A		0	2	1	0	0	0	0	0	1	0	0	0	0	3	1	2	0	0
Bradi1g10416	AT1G14730.1 | Cytochrome b561/ferric reductase transmembrane protein family		LOC_Os03g50820.1 | cytochrome b561, putative, expressed		N/A		0	0	0	2	0	1	0	0	1	0	0	0	0	1	1	3	1	0
Bradi1g10422	AT1G66170.1 | RING/FYVE/PHD zinc finger superfamily protein		LOC_Os03g50780.1 | PHD-finger domain containing protein, putative, expressed		N/A		0	0	0	0	0	0	0	0	0	0	0	0	2	2	1	2	2	0
Bradi1g10430	AT1G74310.1 | heat shock protein 101		LOC_Os02g33420.1 | ATPase, AAA family protein, expressed		N/A		0	1	0	1	1	0	0	0	1	0	0	0	1	3	1	4	0	0
Bradi1g10440	AT4G36630.1 | Vacuolar sorting protein 39		LOC_Os03g50740.2 | retrotransposon protein, putative, SINE subclass, expressed,LOC_Os03g50740.1 | retrotransposon protein, putative, SINE subclass, expressed		N/A		1	0	0	0	0	0	0	0	0	0	0	0	1	1	1	1	1	0
Bradi1g10447	AT1G67960.1 |		LOC_Os03g50730.1 | transmembrane anterior posterior transformation 1, putative, expressed		N/A		0	0	0	1	0	3	0	0	0	0	0	0	3	0	1	2	0	0
Bradi1g10470	No hits found		No hits found		MYB		0	0	0	0	0	1	0	0	0	0	0	0	2	0	1	1	0	0
Bradi1g10475	AT4G12790.1 | P-loop containing nucleoside triphosphate hydrolases superfamily protein		LOC_Os03g50620.1 | ATP binding protein, putative, expressed		N/A		0	1	0	0	0	0	0	0	2	0	0	0	0	0	1	11	0	0
Bradi1g10480	No hits found		LOC_Os03g50600.1 | expressed protein		N/A		0	1	0	1	0	2	0	0	1	0	0	0	0	0	1	4	0	0
Bradi1g10490	No hits found		No hits found		N/A		0	0	0	0	0	0	0	0	2	0	0	0	0	2	1	1	0	0
Bradi1g10500	AT3G06910.1 | UB-like protease 1A		LOC_Os06g13890.1 | expressed protein		N/A		0	0	0	0	0	1	0	0	0	0	0	0	0	0	0	0	0	0
Bradi1g10510	AT4G38180.1 | FAR1-related sequence 5		LOC_Os06g13740.1 | transposon protein, putative, unclassified, expressed		N/A		0	0	0	0	0	0	0	1	0	0	0	0	1	0	0	0	2	0
Bradi1g10520	AT4G17720.1 | RNA-binding (RRM/RBD/RNP motifs) family protein		LOC_Os03g50560.1 | RNA recognition motif containing protein, putative, expressed		N/A		0	0	0	0	0	0	0	0	2	0	1	0	0	1	0	0	1	0
Bradi1g10525	No hits found		No hits found		N/A		0	0	0	0	0	0	0	0	0	0	0	0	0	0	1	5	1	0
Bradi1g10530	AT1G73500.1 | MAP kinase kinase 9		LOC_Os03g50550.1 | STE_MEK_ste7_MAP2K.7 - STE kinases include homologs to sterile 7, sterile 11 and sterile 20 from yeast, expressed		N/A		0	0	0	1	1	0	0	0	0	0	0	0	0	0	0	0	0	0
Bradi1g10540	AT2G44050.1 | 6,7-dimethyl-8-ribityllumazine synthase / DMRL synthase / lumazine synthase / riboflavin synthase		LOC_Os04g42000.1 | 6,7-dimethyl-8-ribityllumazine synthase, chloroplast precursor, putative, expressed		N/A		0	0	0	0	0	2	0	0	1	0	0	0	1	0	1	7	0	0
Bradi1g10550	AT1G18350.1 | MAP kinase kinase 7		LOC_Os03g50550.1 | STE_MEK_ste7_MAP2K.7 - STE kinases include homologs to sterile 7, sterile 11 and sterile 20 from yeast, expressed		N/A		0	2	1	0	0	0	0	0	1	1	0	0	1	1	0	0	0	0
Bradi1g10560	AT1G73500.1 | MAP kinase kinase 9		LOC_Os03g50550.1 | STE_MEK_ste7_MAP2K.7 - STE kinases include homologs to sterile 7, sterile 11 and sterile 20 from yeast, expressed		N/A		0	0	0	1	0	0	0	0	1	0	0	0	1	0	1	2	0	0
Bradi1g10567	AT1G15200.1 | protein-protein interaction regulator family protein		LOC_Os03g49520.1 | pinin/SDK/memA protein, putative, expressed		N/A		0	0	0	1	0	2	0	0	1	0	0	0	1	0	1	1	0	2
Bradi1g10580	AT5G49690.1 | UDP-Glycosyltransferase superfamily protein		LOC_Os03g49524.1 | anthocyanidin 3-O-glucosyltransferase, putative, expressed		N/A		0	0	0	1	0	4	0	0	0	0	0	0	0	1	1	1	0	2
Bradi1g10590	AT5G49690.1 | UDP-Glycosyltransferase superfamily protein		LOC_Os03g49524.1 | anthocyanidin 3-O-glucosyltransferase, putative, expressed		N/A		0	0	0	1	1	0	0	0	1	0	0	0	0	0	0	0	0	0
Bradi1g10600	AT5G49690.1 | UDP-Glycosyltransferase superfamily protein		LOC_Os03g49524.1 | anthocyanidin 3-O-glucosyltransferase, putative, expressed		N/A		0	1	0	0	1	1	0	0	1	0	0	0	0	1	0	0	0	0
Bradi1g10605	No hits found		LOC_Os01g64220.1 | expressed protein		N/A		1	0	0	0	0	0	0	0	1	0	0	0	0	2	1	2	1	0
Bradi1g10610	AT5G65550.1 | UDP-Glycosyltransferase superfamily protein		LOC_Os03g49550.1 | glucosyltransferase, putative, expressed		ZF-HD		0	0	0	2	0	2	0	0	1	0	0	0	1	0	0	0	0	0
Bradi1g10621	AT5G65550.1 | UDP-Glycosyltransferase superfamily protein		LOC_Os03g49524.1 | anthocyanidin 3-O-glucosyltransferase, putative, expressed		N/A		0	0	0	0	0	1	0	0	0	0	0	0	0	0	1	1	1	0
Bradi1g10630	No hits found		LOC_Os03g49560.1 | expressed protein		N/A		0	1	0	0	0	1	0	0	0	0	0	0	0	1	1	1	1	0
Bradi1g10635	AT3G17430.1 | Nucleotide-sugar transporter family protein		LOC_Os03g49570.1 | domain of unknown function, DUF250 domain containing protein, expressed		N/A		0	0	0	1	1	1	0	1	1	0	0	0	0	0	0	0	0	0
Bradi1g10640	No hits found		LOC_Os05g01180.1 | zinc knuckle family protein, expressed		N/A		0	0	0	1	0	1	0	2	0	0	0	0	2	0	0	0	0	0
Bradi1g10650	AT3G26618.1 | eukaryotic release factor 1-3		LOC_Os03g49580.1 | eukaryotic peptide chain release factor subunit 1-1, putative, expressed		N/A		0	0	0	0	0	0	0	0	2	0	0	0	0	1	0	0	0	0
Bradi1g10660	AT3G18070.1 | beta glucosidase 43		LOC_Os03g49600.1 | Os3bglu7 - beta-glucosidase, exo-beta-glucanse, expressed		N/A		0	1	0	1	0	0	0	0	0	1	0	0	0	1	1	6	0	0
Bradi1g10670	AT3G26618.1 | eukaryotic release factor 1-3		LOC_Os03g49580.1 | eukaryotic peptide chain release factor subunit 1-1, putative, expressed		N/A		0	0	0	0	0	1	0	0	1	0	0	0	0	0	1	4	0	0
Bradi1g10680	No hits found		LOC_Os03g49590.1 | expressed protein		N/A		0	0	0	0	0	1	1	0	0	0	0	0	0	2	1	9	0	0
Bradi1g10689	AT3G18080.1 | B-S glucosidase 44		LOC_Os03g49600.1 | Os3bglu7 - beta-glucosidase, exo-beta-glucanse, expressed		N/A		0	2	1	1	0	0	0	0	0	0	0	0	1	0	1	4	0	0
Bradi1g10697	AT3G18080.1 | B-S glucosidase 44		LOC_Os03g49600.1 | Os3bglu7 - beta-glucosidase, exo-beta-glucanse, expressed		N/A		0	0	0	0	0	0	0	1	1	0	0	0	0	1	1	5	0	0
Bradi1g10710	AT3G18080.1 | B-S glucosidase 44		LOC_Os03g49610.1 | Os3bglu8 - beta-glucosidase, exo-beta-glucansase, high similarity to Os3bglu7, expressed		N/A		0	0	0	1	2	0	1	0	0	0	0	0	0	1	1	2	0	0
Bradi1g10715	AT5G10290.1 | leucine-rich repeat transmembrane protein kinase family protein		LOC_Os03g49620.3 | BRASSINOSTEROID INSENSITIVE 1-associated receptor kinase 1 precursor, putative, expressed,LOC_Os03g49620.2 | BRASSINOSTEROID INSENSITIVE 1-associated receptor kinase 1 precursor, putative, expressed,LOC_Os03g49620.4 | BRASSINOSTEROID INSENSITIVE 1-associated receptor kinase 1 precursor, putative, expressed		N/A		0	0	0	1	0	0	0	0	0	0	0	0	1	0	0	0	0	0
Bradi1g10720	No hits found		No hits found		N/A		0	0	0	2	0	1	0	1	0	0	0	0	0	0	1	2	0	0
Bradi1g10725	No hits found		LOC_Os03g49630.1 | expressed protein		N/A		1	1	0	0	0	1	1	0	1	0	0	0	2	0	1	6	0	1
Bradi1g10731	AT4G08480.1 | mitogen-activated protein kinase kinase kinase 9		LOC_Os03g49640.2 | STE_MEKK_ste11_MAP3K.14 - STE kinases include homologs to sterile 7, sterile 11 and sterile 20 from yeast, expressed		N/A		0	0	0	0	0	1	0	1	0	0	0	0	0	1	0	0	0	0
Bradi1g10741	No hits found		No hits found		N/A		0	0	0	1	0	0	0	0	0	0	0	0	0	0	0	0	0	0
Bradi1g10750	AT1G71940.1 | SNARE associated Golgi protein family		LOC_Os03g49700.1 | SNARE associated Golgi protein, putative, expressed		FAR1		0	0	0	1	0	0	0	0	0	0	0	0	2	1	0	0	0	0
Bradi1g10760	AT5G14320.1 | Ribosomal protein S13/S18 family		LOC_Os03g49710.1 | ribosomal protein S13p/S18e, putative, expressed		N/A		0	0	0	1	0	0	0	0	0	0	0	0	1	0	1	2	0	0
Bradi1g10765	AT3G26070.1 | Plastid-lipid associated protein PAP / fibrillin family protein		LOC_Os03g49720.1 | PAP fibrillin family domain containing protein, expressed		N/A		0	0	0	0	1	1	1	0	1	0	0	0	0	1	1	1	0	0
Bradi1g10770	AT2G17900.1 | SET domain group 37		LOC_Os03g49730.2 | zinc finger protein, putative, expressed		N/A		0	0	0	0	0	0	0	0	0	0	0	0	0	0	0	0	0	0
Bradi1g10780	AT1G77720.1 | putative protein kinase 1		LOC_Os03g49750.1 | protein kinase family protein, putative, expressed		N/A		0	0	0	0	0	0	0	0	0	0	0	0	1	0	0	0	0	0
Bradi1g10790	AT4G08180.1 | OSBP(oxysterol binding protein)-related protein 1C		LOC_Os03g49770.1 | oxysterol-binding protein, putative, expressed		N/A		1	0	0	0	0	2	0	1	0	0	0	0	0	1	1	1	0	0
Bradi1g10800	AT1G21980.1 | phosphatidylinositol-4-phosphate 5-kinase 1		LOC_Os03g49800.1 | phosphatidylinositol-4-phosphate 5-kinase, putative, expressed		N/A		0	1	0	1	0	0	0	0	3	1	0	0	0	1	0	0	0	1
Bradi1g10810	AT5G22090.1 | Protein of unknown function (DUF3049)		LOC_Os03g49830.1 | expressed protein		N/A		0	1	1	0	0	0	2	0	1	0	0	0	0	0	1	13	0	0
Bradi1g10820	AT3G18550.1 | TCP family transcription factor		LOC_Os03g49880.1 | TCP family transcription factor, putative, expressed		N/A		0	1	0	1	0	2	0	0	4	1	1	0	1	0	1	1	0	0
Bradi1g10831	No hits found		No hits found		N/A		0	1	1	0	0	0	0	0	1	0	0	0	0	1	1	3	0	0
Bradi1g10840	AT1G18470.1 | Transmembrane Fragile-X-F-associated protein		LOC_Os03g49900.1 | zinc finger, C3HC4 type domain containing protein, expressed		N/A		0	1	1	0	0	1	0	0	2	0	0	0	0	1	0	0	0	0
Bradi1g10845	No hits found		LOC_Os03g49940.1 | integral membrane protein, putative, expressed		N/A		0	0	0	0	0	0	0	0	0	0	0	0	0	1	0	0	1	0
Bradi1g10850	AT2G01570.1 | GRAS family transcription factor family protein		LOC_Os03g49990.1 | GRAS family transcription factor domain containing protein, expressed		N/A		0	1	1	0	0	0	0	1	0	0	0	0	1	0	0	0	0	0
Bradi1g10860	No hits found		No hits found		N/A		0	0	0	0	0	0	0	1	2	2	0	0	0	0	0	0	0	0
Bradi1g10865	AT3G17970.1 | translocon at the outer membrane of chloroplasts 64-III		LOC_Os03g50010.1 | toc64, putative, expressed		N/A		0	1	1	0	0	0	0	1	1	0	1	0	0	2	1	3	0	0
Bradi1g10870	AT2G06925.1 | Phospholipase A2 family protein		LOC_Os03g50030.1 | phospholipase A2, putative, expressed		N/A		0	1	1	0	0	1	0	1	1	0	0	0	0	1	1	1	1	0
Bradi1g10875	AT2G01490.1 | phytanoyl-CoA dioxygenase (PhyH) family protein		LOC_Os03g50040.1 | phytanoyl-CoA dioxygenase, putative, expressed,LOC_Os05g39650.1 | phytanoyl-CoA dioxygenase, putative, expressed		N/A		0	0	0	0	1	1	0	0	0	0	0	0	0	1	1	1	2	0
Bradi1g10880	AT3G25750.1 | F-box family protein with a domain of unknown function (DUF295)		LOC_Os03g50050.1 | OsFBDUF16 - F-box and DUF domain containing protein, expressed		N/A		0	0	0	0	0	0	0	0	1	0	0	0	0	0	1	1	0	0
Bradi1g10891	AT1G73650.3 | Protein of unknown function (DUF1295)		LOC_Os03g50070.1 | DUF1295 domain containing protein, putative, expressed		N/A		0	1	0	1	0	0	0	0	0	0	0	0	1	0	1	4	0	0
Bradi1g10900	AT1G18170.1 | FKBP-like peptidyl-prolyl cis-trans isomerase family protein		LOC_Os03g50080.1 | peptidyl-prolyl cis-trans isomerase, FKBP-type, putative, expressed		N/A		0	0	0	1	0	0	0	0	1	0	0	0	0	1	0	0	0	0
Bradi1g10910	AT1G22450.1 | cytochrome C oxidase 6B		LOC_Os03g27290.1 | cytochrome c oxidase subunit, putative, expressed		N/A		0	0	0	0	0	1	0	0	1	0	0	0	3	1	1	3	0	1
Bradi1g10917	AT2G33730.1 | P-loop containing nucleoside triphosphate hydrolases superfamily protein		LOC_Os03g50090.4 | transposon protein, putative, CACTA, En/Spm sub-class, expressed		N/A		0	0	0	0	0	1	1	0	2	0	0	0	1	0	1	4	1	0
Bradi1g10930	AT1G70750.1 | Protein of unknown function, DUF593		LOC_Os03g50100.1 | expressed protein		N/A		1	0	0	0	1	1	1	0	0	0	0	0	0	1	0	0	0	1
Bradi1g10940	AT3G04930.2 | DNA-binding storekeeper protein-related transcriptional regulator		LOC_Os03g50110.1 | transcription regulator, putative, expressed		N/A		0	0	0	0	0	0	0	0	1	0	0	0	1	0	0	0	0	0
Bradi1g10945	AT1G70650.2 | Ran BP2/NZF zinc finger-like superfamily protein		LOC_Os03g50120.1 | zinc finger family protein, putative, expressed		N/A		0	0	0	0	0	1	0	0	2	1	0	0	1	1	1	2	0	0
Bradi1g10950	AT1G65820.1 | microsomal glutathione s-transferase, putative,AT1G65820.3 | microsomal glutathione s-transferase, putative		LOC_Os03g50130.1 | microsomal glutathione S-transferase 3, putative, expressed		N/A		1	1	0	0	1	0	1	0	1	1	0	0	0	0	1	4	0	0
Bradi1g10960	AT2G02850.1 | plantacyanin		LOC_Os03g50140.1 | plastocyanin-like domain containing protein, putative, expressed		N/A		0	0	0	0	0	1	0	0	1	0	0	0	0	1	1	2	0	0
Bradi1g10970	AT2G02850.1 | plantacyanin		LOC_Os03g50160.1 | plastocyanin-like domain containing protein, putative, expressed		N/A		0	2	0	0	0	0	0	0	0	0	0	0	0	0	1	4	0	0
Bradi1g10975	AT1G13340.1 | Regulator of Vps4 activity in the MVB pathway protein		LOC_Os03g50210.1 | DUF292 domain containing protein, expressed		N/A		0	0	0	0	0	0	0	0	3	0	0	0	0	1	1	6	1	0
Bradi1g10980	AT1G13330.1 | Arabidopsis Hop2 homolog		LOC_Os03g50220.1 | homologous-pairing protein meu13, putative, expressed		N/A		0	1	0	0	1	0	0	0	1	0	0	0	0	0	1	1	0	0
Bradi1g10990	AT1G73885.1 |		LOC_Os03g50270.1 | expressed protein		N/A		0	0	0	0	0	0	0	0	0	0	0	0	0	0	0	0	1	0
Bradi1g11000	No hits found		LOC_Os11g26580.1 | MEGL18 - Maternally expressed gene MEG family protein precursor, putative, expressed		N/A		0	0	0	0	0	0	0	1	1	0	0	0	0	0	1	2	0	1
Bradi1g11010	No hits found		LOC_Os09g15410.1 | retrotransposon protein, putative, unclassified		N/A		0	0	0	0	0	1	0	0	1	0	0	0	1	1	1	4	1	0
Bradi1g11020	AT4G39670.1 | Glycolipid transfer protein (GLTP) family protein		LOC_Os03g50280.1 | GLTP domain containing protein, putative, expressed		N/A		0	0	0	0	0	0	0	0	1	0	0	0	0	1	1	4	0	0
Bradi1g11027	AT3G02520.1 | general regulatory factor 7,AT5G38480.1 | general regulatory factor 3		LOC_Os03g50290.3 | 14-3-3 protein, putative, expressed,LOC_Os03g50290.2 | 14-3-3 protein, putative, expressed		N/A		0	0	0	2	0	2	0	0	3	0	0	0	1	0	0	0	0	0
Bradi1g11040	AT3G18480.1 | CCAAT-displacement protein alternatively spliced product		LOC_Os03g50300.1 | CASP, putative, expressed		N/A		0	1	0	1	0	0	0	0	1	0	0	0	0	0	1	2	1	0
Bradi1g11050	AT1G25440.1 | B-box type zinc finger protein with CCT domain		LOC_Os03g50310.1 | CCT/B-box zinc finger protein, putative, expressed		N/A		0	0	0	0	0	0	0	0	1	0	0	0	1	0	1	1	0	0
Bradi1g11060	AT1G49340.2 | Phosphatidylinositol 3- and 4-kinase family protein		LOC_Os03g50320.1 | phosphatidylinositol 4-kinase PI4K, putative, expressed,LOC_Os03g50325.1 | phosphatidylinositol 4-kinase, putative, expressed		TCP		0	0	0	0	0	0	0	0	0	0	0	0	2	0	1	1	1	0
Bradi1g11066	AT2G45550.1 | cytochrome P450, family 76, subfamily C, polypeptide 4		LOC_Os01g27890.1 | cytochrome P450, putative, expressed		N/A		0	2	0	0	0	0	0	0	0	1	0	0	1	0	0	0	0	0
Bradi1g11070	AT5G60550.1 | geminivirus rep interacting kinase 2		LOC_Os03g50330.1 | CAMK_KIN1/SNF1/Nim1_like.18 - CAMK includes calcium/calmodulin depedent protein kinases, expressed		N/A		0	1	0	1	0	0	0	0	3	0	0	0	2	0	1	2	1	1
Bradi1g11080	AT1G14900.1 | high mobility group A		LOC_Os03g50355.1 | AT hook-containing DNA-binding protein, putative, expressed		N/A		0	2	1	1	0	0	0	0	1	0	0	0	3	0	1	1	0	0
Bradi1g11090	No hits found		LOC_Os01g70480.1 | expressed protein		GRAS		0	0	0	0	1	0	1	0	0	0	0	0	0	0	1	2	1	0
Bradi1g11101	AT3G25940.1 | TFIIB zinc-binding protein		LOC_Os03g50380.1 | DNA-directed RNA polymerase I subunit RPA12, putative, expressed		N/A		0	1	0	1	0	1	0	1	1	0	0	0	0	1	1	6	0	1
Bradi1g11110	AT2G13510.1 |		LOC_Os07g23494.1 | expressed protein		N/A		0	0	0	0	1	0	0	0	0	0	0	0	0	0	1	2	0	0
Bradi1g11120	AT3G17850.1 | Protein kinase superfamily protein		LOC_Os03g50390.1 | AGC_AGC_other_GWLd.2 - ACG kinases include homologs to PKA, PKG and PKC, expressed		N/A		0	0	0	1	0	0	0	1	0	0	0	0	0	1	0	0	2	0
Bradi1g11130	AT4G37110.1 | Zinc-finger domain of monoamine-oxidase A repressor R1		LOC_Os03g50420.1 | expressed protein		N/A		0	0	0	0	0	0	0	0	1	0	0	0	1	0	1	15	0	0
Bradi1g11140	AT1G70650.1 | Ran BP2/NZF zinc finger-like superfamily protein		LOC_Os03g50430.1 | zinc finger family protein, putative, expressed		N/A		0	1	0	0	0	1	0	0	0	0	0	0	0	0	1	2	2	0
Bradi1g11150	AT1G70660.1 | MMS ZWEI homologue 2,AT1G70650.2 | Ran BP2/NZF zinc finger-like superfamily protein		LOC_Os03g50440.1 | ubiquitin-conjugating enzyme, putative, expressed		N/A		0	0	0	0	1	1	0	0	0	0	0	0	0	2	1	1	1	0
Bradi1g11160	AT5G14620.1 | domains rearranged methyltransferase 2		LOC_Os03g02010.4 | DNA methyltransferase protein, putative, expressed		N/A		0	0	0	0	0	0	0	0	0	0	0	0	0	1	1	7	0	0
Bradi1g11171	No hits found		No hits found		N/A		0	0	0	0	0	0	0	0	0	0	0	0	1	0	0	0	0	0
Bradi1g11180	No hits found		No hits found		N/A		0	1	1	0	0	0	0	0	0	0	0	0	0	2	0	0	0	0
Bradi1g11187	AT1G48480.1 | receptor-like kinase 1		LOC_Os03g50450.1 | inactive receptor kinase At2g26730 precursor, putative, expressed		N/A		0	0	0	0	1	0	0	0	0	0	0	0	0	0	0	0	0	0
Bradi1g11200	AT5G63520.1 |		LOC_Os03g46140.1 | OsFBX101 - F-box domain containing protein, expressed		GeBP		0	0	0	0	0	1	0	1	1	0	0	0	0	0	1	3	0	0
Bradi1g11210	AT1G70730.3 | Phosphoglucomutase/phosphomannomutase family protein		LOC_Os03g50480.1 | phosphoglucomutase, putative, expressed		N/A		0	1	1	0	0	1	0	1	0	1	0	0	2	0	1	2	0	0
Bradi1g11220	AT1G66200.1 | glutamine synthase clone F11		LOC_Os03g50490.1 | glutamine synthetase, catalytic domain containing protein, expressed		N/A		0	1	0	0	0	1	0	0	1	0	0	0	0	1	1	2	0	0
Bradi1g11230	AT4G04880.1 | adenosine/AMP deaminase family protein		LOC_Os07g46630.1 | AMP deaminase, putative, expressed		N/A		0	0	0	0	0	0	0	1	0	0	0	0	3	0	1	1	0	0
Bradi1g11240	AT4G01570.1 | Tetratricopeptide repeat (TPR)-like superfamily protein		LOC_Os03g50500.1 | PPR repeat domain containing protein, putative, expressed		N/A		0	0	0	0	0	0	0	0	0	0	0	0	1	1	1	5	0	0
Bradi1g11250	AT3G10050.1 | L-O-methylthreonine resistant 1		LOC_Os03g50510.1 | threonine dehydratase biosynthetic, chloroplast precursor, putative, expressed		N/A		0	0	0	0	0	1	0	0	0	0	0	0	0	1	0	0	0	0
Bradi1g11260	AT1G14830.1 | DYNAMIN-like 1C		LOC_Os03g50520.1 | dynamin family protein, putative, expressed		N/A		0	0	0	0	1	0	0	0	0	0	0	0	0	0	1	1	1	0
Bradi1g11270	AT2G01755.1 |		LOC_Os03g50530.1 | expressed protein		N/A		0	0	0	0	0	2	2	1	3	0	0	0	0	0	1	4	0	0
Bradi1g11273	AT5G37510.1 | NADH-ubiquinone dehydrogenase, mitochondrial, putative		LOC_Os03g50540.1 | 2Fe-2S iron-sulfur cluster binding domain containing protein, expressed		N/A		0	0	0	1	0	1	0	1	0	0	0	0	0	1	0	0	0	0
Bradi1g11277	AT1G73500.1 | MAP kinase kinase 9		LOC_Os03g50550.1 | STE_MEK_ste7_MAP2K.7 - STE kinases include homologs to sterile 7, sterile 11 and sterile 20 from yeast, expressed		N/A		0	0	0	0	0	0	0	0	0	0	0	0	1	0	1	1	0	0
Bradi1g11280	AT1G10900.1 | Phosphatidylinositol-4-phosphate 5-kinase family protein,AT1G60890.2 | Phosphatidylinositol-4-phosphate 5-kinase family protein,AT1G60890.1 | Phosphatidylinositol-4-phosphate 5-kinase family protein		LOC_Os03g49510.1 | phosphatidylinositol-4-phosphate 5-kinase, putative, expressed		N/A		0	0	0	1	0	1	0	0	1	0	0	0	1	3	0	0	0	0
Bradi1g11290	AT1G66340.1 | Signal transduction histidine kinase, hybrid-type, ethylene sensor		LOC_Os03g49500.2 | ethylene receptor, putative, expressed		N/A		0	0	0	1	0	2	0	0	1	0	0	0	1	2	0	0	0	0
Bradi1g11300	AT1G44770.2 |		LOC_Os03g49490.1 | expressed protein		N/A		0	0	0	0	0	1	0	0	0	0	0	0	0	0	1	2	0	0
Bradi1g11310	AT5G11760.1 |		LOC_Os03g49485.1 | expressed protein		CO-like		0	0	0	1	0	0	0	0	1	0	0	0	0	1	0	0	0	0
Bradi1g11317	AT3G07990.1 | serine carboxypeptidase-like 27		LOC_Os05g18604.1 | OsSCP28 - Putative Serine Carboxypeptidase homologue, expressed		N/A		1	0	0	0	0	0	0	0	2	0	0	0	0	0	1	7	2	0
Bradi1g11330	No hits found		No hits found		N/A		0	1	0	0	0	0	0	0	0	0	0	0	1	0	1	7	0	0
Bradi1g11340	AT3G06470.1 | GNS1/SUR4 membrane protein family		LOC_Os03g49480.1 | elongation of fatty acids protein 2, putative, expressed		N/A		0	1	0	0	0	0	0	0	1	0	0	0	1	0	1	1	0	0
Bradi1g11350	AT2G13600.1 | Pentatricopeptide repeat (PPR) superfamily protein		LOC_Os03g49464.1 | tetratricopeptide-like helical, putative, expressed,LOC_Os03g49464.2 | tetratricopeptide-like helical, putative, expressed		N/A		0	0	0	0	0	0	0	0	1	0	0	0	0	1	1	1	0	0
Bradi1g11357	AT4G02725.1 |		LOC_Os03g49450.1 | expressed protein		N/A		0	1	1	0	2	0	1	0	1	0	0	0	0	0	1	2	0	1
Bradi1g11365	AT2G32150.1 | Haloacid dehalogenase-like hydrolase (HAD) superfamily protein		LOC_Os03g49440.1 | phosphatase, putative, expressed		N/A		0	0	0	0	1	0	1	0	3	0	0	0	0	0	1	2	1	0
Bradi1g11372	AT1G03140.1 | splicing factor Prp18 family protein		LOC_Os03g49430.1 | pre-mRNA-splicing factor, putative, expressed		N/A		0	0	0	0	0	1	0	0	0	0	0	0	0	1	0	0	0	0
Bradi1g11380	AT5G19820.1 | ARM repeat superfamily protein		LOC_Os03g49420.1 | HEAT repeat family protein, putative, expressed		N/A		0	0	0	0	1	0	1	0	1	0	0	0	1	1	1	2	0	0
Bradi1g11390	No hits found		No hits found		N/A		1	1	0	4	1	0	0	0	0	0	0	0	0	0	1	6	1	0
Bradi1g11397	AT5G03280.1 | NRAMP metal ion transporter family protein		LOC_Os07g06130.2 | ethylene-insensitive protein, putative, expressed,LOC_Os07g06130.3 | ethylene-insensitive protein, putative, expressed		N/A		0	0	0	0	0	1	0	0	0	0	0	0	0	0	1	1	0	0
Bradi1g11410	AT1G55020.1 | lipoxygenase 1		LOC_Os03g49380.1 | lipoxygenase, putative, expressed		N/A		0	0	0	0	0	1	0	0	0	0	0	0	0	0	0	0	0	0
Bradi1g11420	AT1G55020.1 | lipoxygenase 1,AT3G22400.1 | PLAT/LH2 domain-containing lipoxygenase family protein		LOC_Os03g52860.1 | lipoxygenase, putative, expressed,LOC_Os03g49350.1 | lipozygenase protein, putative, expressed		N/A		0	0	0	0	0	0	0	0	1	0	0	0	1	0	1	1	1	0
Bradi1g11423	AT1G55000.3 | peptidoglycan-binding LysM domain-containing protein		LOC_Os03g49250.1 | OsFBO16 - F-box and other domain containing protein, expressed		N/A		0	0	0	0	0	0	0	0	1	0	0	0	1	0	0	0	0	0
Bradi1g11426	AT1G03150.1 | Acyl-CoA N-acyltransferases (NAT) superfamily protein		LOC_Os03g49230.1 | acetyltransferase, GNAT family, putative, expressed		N/A		0	1	0	0	0	1	0	0	0	0	0	0	1	0	0	0	0	0
Bradi1g11430	AT4G14270.2 |		LOC_Os05g27780.1 | expressed protein		N/A		0	0	0	0	1	0	0	0	2	0	0	0	1	0	1	8	0	0
Bradi1g11435	AT3G57610.1 | adenylosuccinate synthase		LOC_Os03g49220.1 | adenylosuccinate synthetase, chloroplast precursor, putative, expressed		N/A		0	0	0	0	1	0	0	0	1	0	0	0	1	0	1	3	0	0
Bradi1g11440	AT1G10000.1 | Ribonuclease H-like superfamily protein		LOC_Os02g04410.1 | expressed protein		N/A		0	1	1	0	0	0	0	0	0	0	0	0	2	1	1	2	0	0
Bradi1g11450	AT5G14520.1 | pescadillo-related		LOC_Os03g49210.1 | BRCA1 C Terminus domain containing protein, expressed		N/A		1	2	1	1	0	3	1	1	2	0	0	0	0	0	1	3	0	0
Bradi1g11465	AT3G27640.1 | Transducin/WD40 repeat-like superfamily protein		LOC_Os03g49200.1 | WD domain, G-beta repeat domain containing protein, expressed		N/A		0	1	1	1	1	0	0	0	0	0	0	0	0	1	1	2	0	0
Bradi1g11480	AT3G01570.1 | Oleosin family protein		LOC_Os03g49190.1 | oleosin, putative, expressed		N/A		0	0	0	0	0	0	0	0	0	0	0	0	0	0	0	0	3	0
Bradi1g11490	AT1G53550.1 | F-box family protein		LOC_Os10g34300.1 | OsFBX387 - F-box domain containing protein, expressed		N/A		0	0	0	1	0	2	0	0	1	0	0	0	0	0	1	2	0	0
Bradi1g11500	No hits found		No hits found		N/A		0	0	0	0	0	0	0	0	0	0	0	0	0	1	1	5	0	0
Bradi1g11510	AT2G41900.1 | CCCH-type zinc finger protein with ARM repeat domain		LOC_Os03g49170.3 | zinc finger family protein, putative, expressed		N/A		0	0	0	0	0	0	0	0	1	0	0	0	0	2	0	0	0	0
Bradi1g11520	AT2G40110.1 | Yippee family putative zinc-binding protein		LOC_Os03g49150.1 | yippee zinc-binding protein, putative, expressed		N/A		0	0	0	3	0	0	0	1	0	0	0	0	1	3	1	1	0	0
Bradi1g11525	AT2G40090.1 | ABC2 homolog 9		LOC_Os11g34750.1 | ABC1 family domain containing protein, putative, expressed		N/A		0	0	0	0	0	2	0	0	2	0	0	0	1	1	0	0	2	0
Bradi1g11530	AT5G59820.1 | C2H2-type zinc finger family protein		LOC_Os03g49132.1 | ZOS3-16 - C2H2 zinc finger protein, expressed		N/A		0	0	0	0	1	0	1	0	2	0	0	0	1	0	0	0	0	0
Bradi1g11540	AT2G37210.1 | lysine decarboxylase family protein		LOC_Os03g49050.1 | possible lysine decarboxylase domain containing protein, expressed		N/A		0	0	0	1	0	0	0	0	1	0	0	0	0	0	1	1	0	0
Bradi1g11550	No hits found		No hits found		N/A		0	0	0	0	0	1	0	0	0	0	0	0	0	0	1	1	2	0
Bradi1g11557	AT2G34720.1 | nuclear factor Y, subunit A4,AT3G20910.1 | nuclear factor Y, subunit A9		LOC_Os03g48970.3 | nuclear transcription factor Y subunit, putative, expressed,LOC_Os03g48970.2 | nuclear transcription factor Y subunit, putative, expressed		N/A		0	1	0	1	1	2	0	0	0	0	0	0	0	1	0	0	0	0
Bradi1g11567	AT3G57500.1 |		LOC_Os03g48960.1 | expressed protein		N/A		0	0	0	1	0	0	0	0	0	0	0	0	3	1	0	0	1	0
Bradi1g11573	AT4G13270.1 | Late embryogenesis abundant (LEA) hydroxyproline-rich glycoprotein family		LOC_Os03g48950.1 | expressed protein		N/A		0	0	0	0	2	0	0	0	2	0	0	0	0	1	1	15	0	0
Bradi1g11580	AT5G26240.1 | chloride channel D		LOC_Os03g48940.1 | chloride channel protein CLC-d, putative, expressed		N/A		0	0	0	0	0	3	1	0	3	0	0	0	0	0	1	16	0	0
Bradi1g11600	AT3G22630.1 | 20S proteasome beta subunit D1		LOC_Os03g48930.1 | peptidase, T1 family, putative, expressed		N/A		0	0	0	1	0	0	0	1	0	0	0	0	2	0	1	1	1	0
Bradi1g11610	AT1G54520.1 |		LOC_Os03g48920.1 | DUF1517 domain containing protein, putative, expressed		N/A		0	0	0	0	1	0	0	0	1	1	0	0	0	0	0	0	0	0
Bradi1g11620	No hits found		LOC_Os06g05580.2 | OsFBDUF30 - F-box and DUF domain containing protein, expressed		N/A		0	0	0	1	0	0	0	0	0	0	0	0	0	0	1	2	0	0
Bradi1g11630	AT3G26330.1 | cytochrome P450, family 71, subfamily B, polypeptide 37		LOC_Os09g10340.1 | cytochrome P450, putative, expressed		N/A		0	0	0	0	0	0	0	0	1	0	0	0	0	1	1	2	0	0
Bradi1g11640	AT2G01820.1 | Leucine-rich repeat protein kinase family protein		LOC_Os03g48890.1 | LRR receptor kinase, putative, expressed		N/A		0	0	0	0	1	0	1	0	2	0	0	0	0	0	0	0	0	0
Bradi1g11645	AT1G66150.1 | transmembrane kinase 1		LOC_Os03g48880.1 | receptor protein kinase TMK1 precursor, putative, expressed		N/A		0	0	0	0	0	1	0	0	2	0	0	0	0	1	1	3	0	0
Bradi1g11650	AT3G11710.1 | lysyl-tRNA synthetase 1		LOC_Os03g38980.1 | tRNA synthetases class II domain containing protein, expressed		N/A		0	0	0	1	0	0	0	0	1	0	0	0	0	0	0	0	1	0
Bradi1g11670	AT5G27820.1 | Ribosomal L18p/L5e family protein		LOC_Os03g48840.1 | ribosomal L18p/L5e family protein, putative, expressed		N/A		1	0	0	0	0	1	0	0	2	0	0	0	0	0	1	8	0	0
Bradi1g11680	AT3G26360.1 | Ribosomal protein S21 family protein		LOC_Os03g48830.1 | ribosomal protein-related, putative, expressed		N/A		0	0	0	3	0	1	0	0	0	0	0	0	0	0	1	2	0	0
Bradi1g11687	No hits found		LOC_Os03g48820.1 | expressed protein		N/A		0	0	0	1	1	0	0	0	1	0	0	0	0	0	0	0	0	0
Bradi1g11700	AT5G62890.3 | Xanthine/uracil permease family protein		LOC_Os03g48810.1 | nucleobase-ascorbate transporter, putative, expressed		N/A		0	0	0	0	0	0	0	0	0	0	0	0	0	2	0	0	0	0
Bradi1g11710	AT1G18980.1 | RmlC-like cupins superfamily protein		LOC_Os03g48780.1 | Cupin domain containing protein, expressed		N/A		0	1	0	0	0	0	0	0	0	0	1	0	0	1	0	0	0	0
Bradi1g11720	AT1G18980.1 | RmlC-like cupins superfamily protein		LOC_Os03g48780.1 | Cupin domain containing protein, expressed		N/A		0	0	0	0	0	0	0	1	2	0	0	0	3	0	0	0	0	0
Bradi1g11725	AT2G43820.1 | UDP-glucosyltransferase 74F2		LOC_Os03g48740.1 | indole-3-acetate beta-glucosyltransferase, putative, expressed		N/A		0	0	0	0	0	0	0	1	0	0	0	0	1	1	1	1	1	0
Bradi1g11730	AT5G19860.1 | Protein of unknown function, DUF538		LOC_Os03g48710.2 | expressed protein		N/A		0	1	1	2	0	0	0	0	0	0	0	0	0	0	0	0	0	0
Bradi1g11740	AT3G47850.1 |		LOC_Os05g13390.1 | expressed protein		N/A		0	0	0	0	0	1	0	1	5	0	0	0	1	0	1	2	0	0
Bradi1g11750	No hits found		No hits found		N/A		0	1	1	0	0	2	1	0	1	0	0	0	2	1	1	2	0	0
Bradi1g11754	AT1G59650.1 | Protein of unknown function (DUF1336)		LOC_Os03g48660.1 | DUF1336 domain containing protein, expressed		N/A		0	1	0	0	2	1	2	0	0	0	0	0	1	0	1	6	0	0
Bradi1g11757	AT1G55265.1 | Protein of unknown function, DUF538		LOC_Os03g48626.2 | expressed protein		N/A		0	1	0	1	0	0	0	0	0	1	0	0	1	0	1	2	0	0
Bradi1g11760	AT1G55265.1 | Protein of unknown function, DUF538		LOC_Os03g48626.1 | expressed protein		C3H		0	0	0	0	1	0	0	0	1	0	0	0	1	1	0	0	0	0
Bradi1g11770	AT5G62620.1 | Galactosyltransferase family protein		LOC_Os03g48610.1 | galactosyltransferase family protein, putative, expressed		N/A		2	0	0	0	1	1	1	0	1	0	0	0	0	0	1	10	0	0
Bradi1g11780	AT2G28150.1 | Domain of unknown function (DUF966)		LOC_Os03g48600.1 | domain of unknown function DUF966 domain containing protein, expressed		N/A		0	0	0	1	0	1	0	0	1	0	0	0	0	0	0	0	0	0
Bradi1g11785	No hits found		LOC_Os03g48570.1 | expressed protein		N/A		0	0	0	0	1	0	0	0	1	0	0	0	2	0	1	1	0	1
Bradi1g11790	AT5G39990.1 | Core-2/I-branching beta-1,6-N-acetylglucosaminyltransferase family protein		LOC_Os03g48560.1 | N-acetylglucosaminyltransferase, putative, expressed		N/A		0	0	0	0	0	0	0	1	0	0	0	0	0	1	0	0	0	0
Bradi1g11795	AT1G74790.1 | catalytics		LOC_Os03g48540.1 | expressed protein		N/A		0	0	0	0	0	0	0	0	0	0	0	0	0	0	0	0	2	0
Bradi1g11800	No hits found		LOC_Os10g39250.1 | retrotransposon protein, putative, unclassified		NF-YA		0	1	1	0	0	0	0	1	0	0	0	0	0	0	1	2	0	0
Bradi1g11805	No hits found		LOC_Os01g34680.1 | expressed protein		N/A		0	0	0	1	0	1	0	0	0	0	0	0	0	1	1	6	0	0
Bradi1g11810	AT5G07350.2 | TUDOR-SN protein 1		LOC_Os02g32350.1 | TUDOR protein with multiple SNc domains, putative, expressed		N/A		0	0	0	0	0	0	0	0	0	0	0	0	1	1	1	1	1	0
Bradi1g11817	No hits found		LOC_Os02g31300.1 | UBX domain containing protein, expressed		N/A		0	0	0	0	0	0	0	0	1	0	0	0	0	1	0	0	0	0
Bradi1g11830	No hits found		LOC_Os05g45990.1 | OsFBX171 - F-box domain containing protein, expressed,LOC_Os04g30830.1 | F-box domain containing protein, expressed		N/A		0	0	0	0	0	0	0	0	1	0	0	0	0	2	0	0	1	0
Bradi1g11837	AT3G26510.4 | Octicosapeptide/Phox/Bem1p family protein		LOC_Os03g48520.1 | PB1 domain containing protein, expressed		N/A		0	0	0	1	0	2	0	1	0	0	0	0	0	8	1	2	1	0
Bradi1g11843	No hits found		No hits found		N/A		0	0	0	1	0	0	3	0	2	0	0	0	1	0	1	3	0	0
Bradi1g11850	AT4G38070.1 | basic helix-loop-helix (bHLH) DNA-binding superfamily protein		LOC_Os03g48490.1 | centromere protein, putative, expressed		N/A		0	0	0	0	4	0	1	0	0	0	0	0	1	0	1	1	0	1
Bradi1g11860	AT1G48320.1 | Thioesterase superfamily protein		LOC_Os03g48480.1 | thioesterase family protein, putative, expressed		N/A		0	1	0	1	0	0	0	1	0	0	0	0	0	0	0	0	0	0
Bradi1g11870	AT1G12060.1 | BCL-2-associated athanogene 5		LOC_Os11g31060.1 | IQ calmodulin-binding and BAG domain containing protein, putative, expressed		N/A		0	0	0	0	1	1	0	0	0	0	0	0	0	1	0	0	0	0
Bradi1g11876	No hits found		LOC_Os01g50360.1 | NAC domain containing protein, putative, expressed		N/A		0	0	0	0	1	0	0	0	1	0	0	0	0	0	1	1	0	0
Bradi1g11882	AT4G33640.1 |		LOC_Os03g48390.1 | expressed protein		N/A		0	0	0	0	0	0	0	0	0	0	0	0	1	0	0	0	0	0
Bradi1g11890	AT1G27150.1 | Tetratricopeptide repeat (TPR)-like superfamily protein		LOC_Os03g48380.1 | expressed protein		N/A		0	1	1	0	0	0	0	0	2	0	0	0	2	0	1	1	0	0
Bradi1g11900	AT5G62670.1 | H(+)-ATPase 11,AT4G30190.1 | H(+)-ATPase 2		LOC_Os12g44150.1 | plasma membrane ATPase, putative, expressed,LOC_Os03g01120.1 | E1-E2 ATPase domain containing protein, expressed		N/A		0	0	0	0	0	1	0	0	0	0	0	0	1	1	0	0	0	0
Bradi1g11910	AT1G29930.1 | chlorophyll A/B binding protein 1		LOC_Os01g41710.1 | chlorophyll A-B binding protein, putative, expressed		N/A		0	0	0	0	0	2	0	0	1	0	0	0	0	0	0	0	1	0
Bradi1g11920	AT5G15070.1 | Phosphoglycerate mutase-like family protein,AT5G15070.2 | Phosphoglycerate mutase-like family protein,AT3G01310.2 | Phosphoglycerate mutase-like family protein		LOC_Os03g48300.1 | histidine acid phosphatase, putative, expressed		N/A		0	0	0	1	0	0	0	0	2	0	0	0	0	4	0	0	0	2
Bradi1g11930	AT1G74740.1 | calcium-dependent protein kinase 30		LOC_Os03g48270.1 | CAMK_CAMK_like.21 - CAMK includes calcium/calmodulin depedent protein kinases, expressed		N/A		0	0	0	1	0	1	1	1	1	0	0	0	0	1	1	5	2	2
Bradi1g11940	AT1G27090.1 | glycine-rich protein		LOC_Os03g48260.1 | expressed protein		N/A		0	0	0	1	0	0	0	0	2	1	0	0	1	1	1	2	1	1
Bradi1g11950	No hits found		LOC_Os03g48190.2 | expressed protein,LOC_Os03g48190.1 | expressed protein		N/A		0	0	0	1	0	0	1	1	0	0	0	0	0	3	0	0	0	0
Bradi1g11960	AT3G61130.1 | galacturonosyltransferase 1		LOC_Os06g49810.1 | glycosyl transferase family 8, putative, expressed		N/A		0	1	1	0	0	0	0	2	0	0	0	0	1	0	1	1	1	0
Bradi1g11971	No hits found		No hits found		N/A		0	0	0	0	0	1	0	0	1	0	0	0	0	0	1	1	0	0
Bradi1g11980	AT5G62680.1 | Major facilitator superfamily protein		LOC_Os03g48180.1 | peptide transporter PTR2, putative, expressed		N/A		0	0	0	1	0	1	0	0	2	0	0	0	0	0	1	2	0	0
Bradi1g11986	AT1G27070.1 | 5\'-AMP-activated protein kinase-related		LOC_Os03g48170.1 | 5-AMP-activated protein kinase-related, putative, expressed		N/A		0	0	0	0	0	1	0	1	0	0	0	0	0	1	0	0	0	0
Bradi1g11992	AT1G67350.2 | ,AT1G67350.1 |		LOC_Os03g48110.1 | expressed protein		N/A		0	0	0	1	1	0	1	2	0	0	0	0	1	0	0	0	2	0
Bradi1g12000	AT4G32820.1 | Tetratricopeptide repeat (TPR)-like superfamily protein		No hits found		N/A		0	1	1	0	0	0	0	1	0	0	0	0	0	1	1	1	0	0
Bradi1g12010	No hits found		No hits found		N/A		0	1	0	0	0	1	0	1	1	0	0	0	0	0	1	2	0	0
Bradi1g12021	No hits found		No hits found		N/A		0	0	0	3	0	0	0	1	0	1	0	0	2	0	1	4	1	0
Bradi1g12030	AT5G09570.1 | Cox19-like CHCH family protein		LOC_Os03g48080.1 | CHCH domain containing protein, expressed		N/A		0	0	0	0	0	1	1	1	1	0	0	0	0	0	1	6	0	0
Bradi1g12040	AT4G30550.1 | Class I glutamine amidotransferase-like superfamily protein		LOC_Os03g48060.1 | class I glutamine amidotransferase, putative, expressed		N/A		0	0	0	0	1	1	0	0	0	0	0	0	0	0	0	0	2	0
Bradi1g12042	AT4G38020.1 | tRNA/rRNA methyltransferase (SpoU) family protein		LOC_Os03g48050.1 | RNA methyltransferase, TrmH family protein, putative, expressed		N/A		0	0	0	0	0	0	0	1	0	0	0	0	0	1	1	1	0	0
Bradi1g12045	AT1G32550.1 | 2Fe-2S ferredoxin-like superfamily protein		LOC_Os03g48040.1 | 2Fe-2S iron-sulfur cluster binding domain containing protein, expressed		N/A		0	0	0	0	0	0	0	0	1	0	0	0	0	0	1	1	0	0
Bradi1g12050	No hits found		No hits found		N/A		0	0	0	0	0	2	0	0	1	0	0	0	0	0	0	0	0	0
Bradi1g12060	AT5G62720.1 | Integral membrane HPP family protein		LOC_Os03g48030.1 | integral membrane HPP family protein, putative, expressed		N/A		0	0	0	0	0	0	0	0	2	0	0	0	0	0	1	6	0	0
Bradi1g12063	AT5G04500.1 | glycosyltransferase family protein 47		LOC_Os03g48010.1 | exostosin, putative, expressed		N/A		0	1	0	0	0	0	0	0	0	0	0	0	2	0	1	4	1	0
Bradi1g12064	AT5G22830.1 | magnesium (Mg) transporter 10		LOC_Os03g48000.1 | CorA-like magnesium transporter protein, putative, expressed		N/A		0	1	0	0	0	1	0	0	0	0	0	0	0	0	1	7	0	0
Bradi1g12065	AT1G48910.1 | Flavin-containing monooxygenase family protein		LOC_Os12g08780.1 | flavin monooxygenase, putative, expressed		N/A		0	0	0	1	0	0	0	0	1	0	0	0	1	1	0	0	0	0
Bradi1g12067	AT2G26160.1 | F-box family protein with a domain of unknown function (DUF295)		LOC_Os01g71250.1 | expressed protein		N/A		0	2	0	0	1	0	1	0	0	0	0	0	2	0	0	0	0	0
Bradi1g12080	AT1G08390.1 |		LOC_Os03g47990.1 | OB-fold nucleic acid binding domain containing protein, putative, expressed		N/A		0	0	0	1	0	1	0	0	0	1	0	0	1	2	1	2	0	0
Bradi1g12090	No hits found		No hits found		N/A		0	0	0	0	0	0	0	0	0	1	0	0	0	0	1	1	0	0
Bradi1g12095	No hits found		No hits found		N/A		0	0	0	0	0	1	0	0	0	0	0	0	0	1	0	0	0	0
Bradi1g12100	AT5G22820.2 | ARM repeat superfamily protein		LOC_Os03g47980.1 | expressed protein		N/A		0	0	0	0	0	0	0	0	1	1	0	0	1	1	1	1	0	0
Bradi1g12110	AT3G09510.1 | Ribonuclease H-like superfamily protein		LOC_Os04g13430.1 | expressed protein		N/A		0	0	0	0	0	0	0	1	0	0	0	0	1	1	0	0	0	0
Bradi1g12117	AT3G21175.2 | ZIM-like 1		LOC_Os03g47970.1 | GATA transcription factor 25, putative, expressed		N/A		0	0	0	2	0	1	0	0	0	0	0	0	0	1	0	0	0	1
Bradi1g12130	AT3G53090.1 | ubiquitin-protein ligase 7		LOC_Os03g47949.1 | HECT-domain domain containing protein, expressed		N/A		0	0	0	3	1	2	0	0	2	0	0	0	0	0	1	1	2	0
Bradi1g12140	AT5G03810.1 | GDSL-like Lipase/Acylhydrolase family protein		LOC_Os03g47940.1 | GDSL-like lipase/acylhydrolase, putative, expressed		N/A		0	0	0	0	0	0	1	0	1	0	0	0	0	1	0	0	0	0
Bradi1g12150	AT4G33720.1 | CAP (Cysteine-rich secretory proteins, Antigen 5, and Pathogenesis-related 1 protein) superfamily protein		LOC_Os07g03730.1 | SCP-like extracellular protein, expressed		N/A		0	0	0	0	0	0	0	0	0	0	0	0	1	2	1	3	1	0
Bradi1g12157	AT5G48930.1 | hydroxycinnamoyl-CoA shikimate/quinate hydroxycinnamoyl transferase		LOC_Os03g47860.1 | transferase family protein, putative, expressed		N/A		0	0	0	0	0	1	0	0	1	0	0	0	2	0	1	1	0	0
Bradi1g12170	AT4G23180.1 | cysteine-rich RLK (RECEPTOR-like protein kinase) 10		LOC_Os05g41370.1 | TKL_IRAK_DUF26-la.1 - DUF26 kinases have homology to DUF26 containing loci, expressed		N/A		0	0	0	1	0	2	0	0	1	0	0	0	0	0	0	0	0	2
Bradi1g12180	AT1G49760.2 | poly(A) binding protein 8		LOC_Os08g22354.1 | polyadenylate-binding protein, putative, expressed		N/A		0	1	0	3	0	0	0	0	0	0	0	0	1	1	0	0	0	0
Bradi1g12190	AT4G05200.1 | cysteine-rich RLK (RECEPTOR-like protein kinase) 25		LOC_Os05g41370.1 | TKL_IRAK_DUF26-la.1 - DUF26 kinases have homology to DUF26 containing loci, expressed		N/A		0	0	0	0	0	0	0	0	0	0	0	0	1	1	0	0	0	0
Bradi1g12196	AT4G23180.1 | cysteine-rich RLK (RECEPTOR-like protein kinase) 10		LOC_Os05g41370.1 | TKL_IRAK_DUF26-la.1 - DUF26 kinases have homology to DUF26 containing loci, expressed		N/A		0	1	0	0	0	4	0	0	2	0	0	0	1	0	1	5	0	0
Bradi1g12200	AT3G09110.1 | Protein of unknown function (DUF674)		LOC_Os01g06030.1 | expressed protein		N/A		0	2	1	0	0	1	0	0	2	1	0	0	0	0	1	6	0	1
Bradi1g12210	AT2G27880.1 | Argonaute family protein		LOC_Os03g47820.1 | PINHEAD, putative, expressed		N/A		0	1	0	0	2	0	1	1	0	0	0	0	2	0	1	2	0	0
Bradi1g12216	AT2G28120.1 | Major facilitator superfamily protein		LOC_Os03g47810.1 | nodulin family protein, putative, expressed		N/A		0	0	0	1	0	1	0	0	1	0	0	0	0	1	1	3	1	0
Bradi1g12222	AT1G60650.2 | RNA-binding (RRM/RBD/RNP motifs) family protein with retrovirus zinc finger-like domain		LOC_Os03g47800.1 | RNA recognition motif containing protein, expressed		N/A		0	1	0	0	0	0	0	0	0	0	0	0	0	0	1	4	0	0
Bradi1g12226	AT5G04280.1 | RNA-binding (RRM/RBD/RNP motifs) family protein with retrovirus zinc finger-like domain		LOC_Os03g47800.1 | RNA recognition motif containing protein, expressed		N/A		0	0	0	0	0	0	0	0	1	0	0	0	0	0	0	0	0	0
Bradi1g12230	AT5G03470.1 | Protein phosphatase 2A regulatory B subunit family protein		LOC_Os03g47790.1 | transposon protein, putative, unclassified, expressed,LOC_Os03g47790.3 | transposon protein, putative, unclassified, expressed		N/A		0	0	0	0	0	0	0	0	1	0	0	0	3	0	1	2	0	0
Bradi1g12240	No hits found		No hits found		N/A		0	0	0	0	0	0	0	0	0	0	0	0	0	0	0	0	0	0
Bradi1g12250	AT1G77850.1 | auxin response factor 17		LOC_Os04g59430.1 | auxin response factor, putative, expressed		N/A		0	0	0	0	0	0	0	0	0	0	0	0	2	2	1	1	0	0
Bradi1g12260	AT1G77850.1 | auxin response factor 17		LOC_Os04g59430.1 | auxin response factor, putative, expressed		N/A		0	0	0	0	1	0	1	1	1	0	0	0	2	0	1	2	0	0
Bradi1g12270	AT1G45050.1 | Ubiquitin-conjugating enzyme family protein		LOC_Os03g47770.1 | ubiquitin-conjugating enzyme E2 W, putative, expressed		N/A		0	0	0	0	0	0	0	0	0	0	0	0	0	0	1	8	0	0
Bradi1g12280	AT1G58250.1 | Golgi-body localisation protein domain ;RNA pol II promoter Fmp27 protein domain		LOC_Os03g23030.1 | aberrant pollen transmission 1, putative, expressed		N/A		0	0	0	0	1	0	1	0	2	0	0	2	2	1	1	2	0	0
Bradi1g12290	No hits found		LOC_Os02g15310.1 | RNA recognition motif containing protein, expressed		N/A		0	0	0	1	1	0	1	0	2	0	0	0	0	0	0	0	0	1
Bradi1g12300	No hits found		No hits found		N/A		0	1	0	0	0	1	0	0	3	0	0	0	1	0	0	0	0	0
Bradi1g12306	AT2G16400.1 | BEL1-like homeodomain 7		LOC_Os03g47740.3 | homeodomain protein, putative, expressed,LOC_Os03g47740.2 | homeodomain protein, putative, expressed		N/A		0	0	0	0	0	0	1	0	0	0	0	0	1	0	1	2	1	0
Bradi1g12309	AT1G19700.1 | BEL1-like homeodomain 10,AT1G19700.3 | BEL1-like homeodomain 10		LOC_Os03g47730.1 | homeobox domain containing protein, expressed		N/A		0	0	0	0	0	0	0	0	0	0	0	0	1	1	1	1	0	1
Bradi1g12312	AT3G04710.3 | ankyrin repeat family protein		LOC_Os03g47650.1 | ankyrin, putative, expressed		N/A		0	1	0	0	0	0	0	0	1	0	0	0	0	0	1	1	1	0
Bradi1g12314	AT3G04710.3 | ankyrin repeat family protein		LOC_Os03g47650.1 | ankyrin, putative, expressed		N/A		0	0	0	0	0	0	0	1	2	0	0	0	0	0	1	1	0	0
Bradi1g12316	AT3G04710.3 | ankyrin repeat family protein		LOC_Os03g47620.1 | ankyrin, putative, expressed		N/A		0	1	0	0	1	0	1	1	1	0	0	0	0	1	0	0	0	3
Bradi1g12320	AT2G29630.1 | thiaminC,AT2G29630.3 | thiaminC		LOC_Os03g47610.5 | thiamine biosynthesis protein thiC, putative, expressed,LOC_Os03g47610.1 | thiamine biosynthesis protein thiC, putative, expressed,LOC_Os03g47610.8 | thiamine biosynthesis protein thiC, putative, expressed,LOC_Os03g47610.4 | thiamine biosynthesis protein thiC, putative, expressed		N/A		0	0	0	0	0	1	0	0	1	0	0	0	1	0	0	0	0	0
Bradi1g12325	AT3G50760.1 | galacturonosyltransferase-like 2		LOC_Os03g47530.1 | glycosyl transferase 8 domain containing protein, putative, expressed		N/A		0	0	0	0	1	0	0	0	0	0	0	0	2	0	0	0	1	0
Bradi1g12330	AT1G19310.1 | RING/U-box superfamily protein		LOC_Os03g47500.2 | zinc finger, C3HC4 type domain containing protein, expressed		GATA		0	1	1	0	0	0	0	0	1	0	0	0	0	2	0	0	1	0
Bradi1g12340	AT2G22880.1 | VQ motif-containing protein		LOC_Os03g47280.1 | VQ domain containing protein, putative, expressed		N/A		0	0	0	0	0	2	0	0	0	0	1	0	0	2	0	0	0	0
Bradi1g12350	AT1G61255.1 |		LOC_Os03g47270.1 | GCRP4 - Glycine and cysteine rich family protein precursor, expressed		N/A		0	0	0	0	0	1	0	0	0	0	0	0	0	0	0	0	0	0
Bradi1g12360	AT2G14660.1 |		LOC_Os03g47260.1 | expressed protein		N/A		2	0	0	0	2	1	1	0	0	0	0	0	0	3	0	0	0	1
Bradi1g12370	AT4G03220.1 | Protein with RNI-like/FBD-like domains		LOC_Os07g02760.2 | OsFBD13 - F-box and FBD domain containing protein, expressed		N/A		0	0	0	0	0	0	1	0	0	0	0	1	1	1	0	0	0	0
Bradi1g12377	AT4G10810.1 |		LOC_Os03g47210.1 | expressed protein		N/A		0	0	0	0	0	0	0	0	0	1	0	0	0	0	0	0	1	0
Bradi1g12390	AT1G75390.1 | basic leucine-zipper 44		LOC_Os03g47200.1 | bZIP transcription factor domain containing protein, expressed		N/A		0	0	0	0	0	0	0	0	2	0	0	0	1	1	0	0	1	0
Bradi1g12397	No hits found		LOC_Os03g47190.1 | expressed protein		N/A		0	0	0	1	0	0	0	0	0	0	0	0	0	0	0	0	0	0
Bradi1g12410	No hits found		LOC_Os12g43750.1 | expressed protein		N/A		0	0	0	0	1	0	0	0	1	0	0	0	1	1	1	3	0	0
Bradi1g12420	AT4G37740.1 | growth-regulating factor 2		LOC_Os03g47140.1 | growth regulating factor protein, putative, expressed		N/A		0	0	0	0	1	1	1	0	0	0	0	0	0	0	1	2	0	0
Bradi1g12431	AT2G14520.1 | CBS domain-containing protein with a domain of unknown function (DUF21)		LOC_Os03g47120.1 | CBS domain containing protein, expressed		N/A		0	1	0	1	0	0	3	0	0	0	0	0	0	0	1	15	0	0
Bradi1g12440	AT1G58520.1 | lipases;hydrolases, acting on ester bonds,AT1G58520.2 | lipases;hydrolases, acting on ester bonds		LOC_Os12g43720.1 | early-responsive to dehydration protein-related, putative, expressed		N/A		0	0	0	1	0	1	0	1	1	0	0	0	0	0	0	0	0	0
Bradi1g12451	No hits found		LOC_Os03g47034.1 | expressed protein		N/A		0	1	1	0	1	0	0	1	0	0	1	0	1	1	1	2	0	1
Bradi1g12460	No hits found		No hits found		N/A		0	0	0	0	0	0	0	0	2	0	0	0	4	0	0	0	0	0
Bradi1g12470	AT4G08150.1 | KNOTTED-like from Arabidopsis thaliana		LOC_Os03g51690.2 | Homeobox domain containing protein, expressed		N/A		0	0	0	1	0	0	0	0	0	0	0	0	0	0	0	0	0	0
Bradi1g12475	AT4G08150.1 | KNOTTED-like from Arabidopsis thaliana		LOC_Os03g51690.2 | Homeobox domain containing protein, expressed		N/A		0	0	0	1	1	1	0	0	2	1	0	1	2	0	1	1	0	0
Bradi1g12476	No hits found		No hits found		N/A		0	0	0	1	0	0	0	0	0	0	0	0	0	0	1	1	1	0
Bradi1g12477	AT2G27610.1 | Tetratricopeptide repeat (TPR)-like superfamily protein		LOC_Os03g62690.1 | pentatricopeptide, putative, expressed		ARF		0	0	0	1	0	1	0	0	1	0	0	0	1	2	0	0	0	0
Bradi1g12480	No hits found		LOC_Os08g45130.1 | histone-lysine N-methyltransferase, putative, expressed		N/A		1	0	0	1	0	0	0	0	2	0	0	0	1	0	1	1	0	0
Bradi1g12490	No hits found		No hits found		N/A		0	0	0	0	0	0	0	1	0	0	0	0	0	3	0	0	0	0
Bradi1g12497	No hits found		No hits found		N/A		0	0	0	0	0	0	0	0	0	0	0	0	0	1	1	1	1	0
Bradi1g12503	AT1G58370.1 | glycosyl hydrolase family 10 protein / carbohydrate-binding domain-containing protein		LOC_Os03g47010.1 | glycosyl hydrolase family 10 protein, putative, expressed		N/A		0	0	0	0	0	0	0	0	1	0	0	0	1	2	1	1	0	0
Bradi1g12510	No hits found		No hits found		TALE		0	1	0	0	0	0	0	0	0	0	0	0	2	0	1	1	0	0
Bradi1g12520	AT4G37810.1 |		LOC_Os03g46930.1 | expressed protein		TALE		0	0	0	1	0	0	0	0	0	0	0	0	0	1	0	0	0	1
Bradi1g12530	AT5G13930.1 | Chalcone and stilbene synthase family protein		LOC_Os05g12240.1 | chalcone synthase, putative, expressed		N/A		0	0	0	0	0	0	0	1	0	0	0	0	0	0	1	2	0	0
Bradi1g12540	AT1G16630.1 | ,AT2G16270.1 |		LOC_Os03g46920.1 | expressed protein		N/A		0	0	0	0	0	0	0	0	0	0	0	0	0	0	1	3	0	0
Bradi1g12543	AT3G22960.1 | Pyruvate kinase family protein		LOC_Os03g46910.1 | pyruvate kinase, putative, expressed		N/A		0	1	0	1	2	0	0	0	0	1	0	0	0	1	1	4	1	0
Bradi1g12550	AT4G37850.1 | basic helix-loop-helix (bHLH) DNA-binding superfamily protein		LOC_Os03g46860.1 | helix-loop-helix DNA-binding protein, putative, expressed		N/A		0	0	0	1	0	0	0	0	1	0	0	0	0	1	0	0	0	0
Bradi1g12560	No hits found		No hits found		N/A		0	1	1	0	0	1	0	0	1	0	0	0	0	2	1	1	0	0
Bradi1g12570	AT4G37850.1 | basic helix-loop-helix (bHLH) DNA-binding superfamily protein		LOC_Os03g46860.1 | helix-loop-helix DNA-binding protein, putative, expressed		N/A		0	0	0	1	0	1	0	0	2	0	0	0	2	0	0	0	0	0
Bradi1g12580	AT2G22760.1 | basic helix-loop-helix (bHLH) DNA-binding superfamily protein		LOC_Os03g46860.1 | helix-loop-helix DNA-binding protein, putative, expressed		N/A		1	0	0	0	1	0	1	0	1	0	0	0	0	1	1	4	1	0
Bradi1g12590	No hits found		No hits found		N/A		0	1	1	2	0	0	0	1	1	0	0	0	0	0	1	3	0	0
Bradi1g12600	AT4G39260.3 | cold, circadian rhythm, and RNA binding 1		LOC_Os12g43600.1 | RNA recognition motif containing protein, expressed		N/A		0	0	0	0	0	0	0	0	0	0	0	0	1	2	1	1	0	0
Bradi1g12610	AT1G20460.1 |		LOC_Os03g46681.1 | expressed protein		N/A		0	0	0	1	0	0	0	0	0	0	0	0	4	0	0	0	0	0
Bradi1g12615	AT4G34480.1 | O-Glycosyl hydrolases family 17 protein		LOC_Os03g46660.1 | glucan endo-1,3-beta-glucosidase precursor, putative, expressed		N/A		0	0	0	0	0	1	0	0	0	0	0	0	0	0	1	1	0	0
Bradi1g12620	AT4G34460.1 | GTP binding protein beta 1		LOC_Os03g46650.1 | WD domain, G-beta repeat domain containing protein, expressed		bZIP		0	1	0	0	0	1	0	0	0	0	0	0	1	2	1	1	0	0
Bradi1g12630	AT3G46940.1 | DUTP-PYROPHOSPHATASE-LIKE 1		LOC_Os03g46640.1 | deoxyuridine 5-triphosphate nucleotidohydrolase, putative, expressed		N/A		0	0	0	0	0	0	1	0	2	0	0	0	0	1	1	4	0	0
Bradi1g12640	AT3G50690.1 | Leucine-rich repeat (LRR) family protein		LOC_Os03g46600.1 | acidic leucine-rich nuclear phosphoprotein 32-related protein 2, putative, expressed		N/A		0	0	0	1	0	0	0	0	1	0	0	0	2	2	1	5	0	0
Bradi1g12650	AT3G12920.1 | SBP (S-ribonuclease binding protein) family protein		LOC_Os03g46570.1 | protein binding protein, putative, expressed		GRF		0	0	0	0	0	1	0	1	0	0	0	0	1	0	1	3	0	0
Bradi1g12660	No hits found		No hits found		N/A		0	0	0	2	0	0	0	0	1	0	0	0	0	0	1	1	0	0
Bradi1g12670	No hits found		No hits found		N/A		0	0	0	0	1	0	1	1	0	0	0	0	1	0	1	1	0	0
Bradi1g12673	AT1G79120.1 | Ubiquitin carboxyl-terminal hydrolase family protein		LOC_Os03g46460.1 | ubiquitin carboxyl-terminal hydrolase, family 1, putative, expressed		N/A		0	0	0	0	0	0	0	1	3	0	0	0	1	0	1	1	0	0
Bradi1g12675	No hits found		LOC_Os03g46510.1 | OsFBX103 - F-box domain containing protein, expressed		N/A		0	1	1	0	0	0	0	0	2	0	0	0	0	1	1	3	0	0
Bradi1g12677	AT1G31260.1 | zinc transporter 10 precursor		LOC_Os03g46470.1 | metal cation transporter, putative, expressed		HB-other		1	0	0	0	0	0	0	0	0	1	0	0	0	0	0	0	0	0
Bradi1g12690	AT5G45110.1 | NPR1-like protein 3		LOC_Os03g46440.1 | BTBA4 - Bric-a-Brac,Tramtrack, Broad Complex BTB domain with Ankyrin repeat region, expressed		TALE		0	1	1	0	0	1	0	0	0	0	0	0	0	1	0	0	0	0
Bradi1g12693	No hits found		No hits found		N/A		0	0	0	3	0	0	0	1	1	0	0	0	0	0	0	0	0	0
Bradi1g12697	AT1G31300.1 | TRAM, LAG1 and CLN8 (TLC) lipid-sensing domain containing protein,AT1G31300.2 | TRAM, LAG1 and CLN8 (TLC) lipid-sensing domain containing protein		LOC_Os03g46410.1 | transmembrane protein 56, putative, expressed		N/A		0	1	0	2	0	0	0	0	2	0	0	0	1	0	1	2	1	1
Bradi1g12701	AT4G19640.1 | Ras-related small GTP-binding family protein		LOC_Os03g46390.1 | ras-related protein, putative, expressed		N/A		0	1	0	0	0	0	0	1	0	2	0	0	0	4	1	1	0	0
Bradi1g12703	AT1G31310.1 | hydroxyproline-rich glycoprotein family protein		LOC_Os03g46350.1 | transcription factor, putative, expressed		N/A		0	0	0	0	0	0	0	0	0	0	0	0	0	2	1	2	0	0
Bradi1g12705	AT2G30880.1 | Pleckstrin homology (PH) domain-containing protein		LOC_Os03g46340.1 | pleckstrin homology domain-containing protein, putative, expressed		N/A		0	1	0	0	0	0	0	0	1	0	0	0	1	0	0	0	0	0
Bradi1g12710	AT1G13980.2 | sec7 domain-containing protein,AT1G13980.1 | sec7 domain-containing protein		LOC_Os03g46330.1 | pattern formation protein EMB30, putative, expressed		N/A		0	1	0	0	0	0	0	0	1	0	0	0	0	0	1	3	0	0
Bradi1g12715	AT3G56210.4 | ARM repeat superfamily protein		LOC_Os03g46310.1 | expressed protein		N/A		2	1	1	0	0	0	0	0	0	0	0	0	0	0	1	9	0	0
Bradi1g12720	AT3G22540.1 | Protein of unknown function (DUF1677)		LOC_Os03g46300.1 | expressed protein		N/A		0	2	0	0	0	1	0	0	1	0	0	1	3	0	1	9	0	0
Bradi1g12727	No hits found		No hits found		N/A		0	0	0	0	1	3	0	0	0	0	0	0	0	1	0	0	0	0
Bradi1g12740	AT3G22550.1 | Protein of unknown function (DUF581)		LOC_Os03g46260.1 | DUF581 domain containing protein, expressed,LOC_Os03g46260.2 | DUF581 domain containing protein, expressed		N/A		0	0	0	0	1	1	0	0	0	0	0	0	0	0	1	3	0	1
Bradi1g12750	AT2G32030.1 | Acyl-CoA N-acyltransferases (NAT) superfamily protein		LOC_Os03g46200.1 | acetyltransferase, GNAT family, putative, expressed		N/A		0	0	0	0	0	0	0	0	0	0	0	0	0	1	0	0	0	0
Bradi1g12760	AT3G22590.1 | PLANT HOMOLOGOUS TO PARAFIBROMIN		LOC_Os03g46190.1 | parafibromin, putative, expressed		bHLH		0	0	0	0	0	0	0	0	1	0	0	0	1	0	1	2	1	0
Bradi1g12765	AT3G22600.1 | Bifunctional inhibitor/lipid-transfer protein/seed storage 2S albumin superfamily protein		LOC_Os03g46180.1 | LTPL71 - Protease inhibitor/seed storage/LTP family protein precursor, expressed		N/A		0	0	0	2	0	0	0	0	4	0	0	0	0	0	1	1	0	0
Bradi1g12770	AT2G48130.1 | Bifunctional inhibitor/lipid-transfer protein/seed storage 2S albumin superfamily protein		LOC_Os03g46150.2 | LTPL72 - Protease inhibitor/seed storage/LTP family protein precursor, expressed		bHLH		0	0	0	0	0	0	0	0	0	0	0	0	0	0	0	0	0	0
Bradi1g12780	AT1G20350.1 | translocase inner membrane subunit 17-1		LOC_Os03g30200.1 | mitochondrial import inner membrane translocase subunit Tim17, putative, expressed		bHLH		0	0	0	2	0	0	0	0	0	0	0	0	0	1	0	0	1	0
Bradi1g12783	AT1G20350.1 | translocase inner membrane subunit 17-1		LOC_Os03g30200.1 | mitochondrial import inner membrane translocase subunit Tim17, putative, expressed		N/A		0	0	0	0	0	0	0	0	1	0	0	0	1	0	0	0	0	0
Bradi1g12787	No hits found		LOC_Os03g46110.1 | LTPL94 - Protease inhibitor/seed storage/LTP family protein precursor, expressed		N/A		0	0	0	0	0	2	0	1	1	0	0	0	0	2	1	5	0	0
Bradi1g12800	AT3G22640.1 | cupin family protein		LOC_Os03g46100.1 | cupin domain containing protein, expressed		N/A		0	1	1	0	0	0	0	0	0	0	0	0	1	0	0	0	1	0
Bradi1g12810	AT2G32010.2 | CVP2 like 1,AT2G32010.1 | CVP2 like 1		LOC_Os03g46090.1 | endonuclease/exonuclease/phosphatase family domain containing protein, expressed		N/A		0	0	0	0	0	0	0	0	0	0	0	0	0	0	0	0	0	0
Bradi1g12820	AT4G11650.1 | osmotin 34		LOC_Os03g46070.1 | thaumatin, putative, expressed		N/A		0	0	0	0	0	1	0	0	0	0	0	0	0	0	0	0	1	1
Bradi1g12830	AT4G11650.1 | osmotin 34		LOC_Os03g45960.1 | thaumatin, putative, expressed		N/A		0	0	0	0	0	0	0	0	0	0	0	0	0	2	1	1	0	0
Bradi1g12837	AT4G20880.1 | ethylene-responsive nuclear protein / ethylene-regulated nuclear protein (ERT2)		LOC_Os03g45930.1 | expressed protein		N/A		1	0	0	0	0	3	0	0	1	0	0	0	1	0	1	6	0	0
Bradi1g12850	AT5G44340.1 | tubulin beta chain 4		LOC_Os03g45920.1 | tubulin/FtsZ domain containing protein, putative, expressed		N/A		0	0	0	0	0	1	0	0	0	0	0	0	0	0	1	3	1	0
Bradi1g12851	AT1G16500.1 |		LOC_Os03g45870.1 | expressed protein		N/A		0	1	1	1	0	0	0	0	1	0	0	0	0	1	0	0	0	0
Bradi1g12852	AT2G20370.1 | Exostosin family protein		LOC_Os12g38450.1 | exostosin family domain containing protein, expressed		N/A		1	0	0	1	0	0	0	0	0	0	0	0	1	0	1	4	0	0
Bradi1g12853	AT1G56150.1 | SAUR-like auxin-responsive protein family		LOC_Os03g45860.1 | OsSAUR17 - Auxin-responsive SAUR gene family member, expressed		N/A		0	0	0	1	0	0	0	0	0	0	0	0	1	0	1	1	0	0
Bradi1g12856	No hits found		No hits found		N/A		0	0	0	0	0	0	0	0	0	0	0	0	1	1	0	0	0	0
Bradi1g12860	AT1G56150.1 | SAUR-like auxin-responsive protein family		LOC_Os03g45860.1 | OsSAUR17 - Auxin-responsive SAUR gene family member, expressed		N/A		1	1	0	0	0	1	0	0	0	0	0	0	3	0	1	5	0	0
Bradi1g12870	AT1G56150.1 | SAUR-like auxin-responsive protein family		LOC_Os03g45800.1 | OsSAUR14 - Auxin-responsive SAUR gene family member, expressed		N/A		0	0	0	0	1	0	0	1	0	0	0	0	0	0	0	0	0	0
Bradi1g12875	AT1G60995.1 |		LOC_Os03g45770.1 | expressed protein		N/A		0	0	0	0	0	0	0	1	1	0	0	0	1	0	1	4	0	0
Bradi1g12880	AT1G16520.1 |		LOC_Os03g45760.1 | expressed protein		N/A		0	1	0	0	0	1	0	0	0	0	0	0	1	0	0	0	0	0
Bradi1g12890	AT2G30130.1 | Lateral organ boundaries (LOB) domain family protein		LOC_Os03g45750.1 | DUF260 domain containing protein, putative, expressed		N/A		0	0	0	1	1	0	0	0	0	0	0	0	2	1	0	0	0	1
Bradi1g12900	AT5G27990.1 | Pre-rRNA-processing protein TSR2, conserved region		LOC_Os08g39820.1 | pre-rRNA-processing protein TSR2, putative, expressed		Trihelix		0	0	0	3	1	0	0	0	1	0	0	0	0	1	0	0	0	1
Bradi1g12910	AT4G17410.1 | DWNN domain, a CCHC-type zinc finger		LOC_Os03g45730.1 | DNA-binding protein-like, putative, expressed		N/A		0	0	0	0	0	0	1	0	1	0	0	0	0	2	1	1	1	0
Bradi1g12920	No hits found		No hits found		N/A		0	0	0	0	0	0	0	0	2	0	0	0	0	1	0	0	0	0
Bradi1g12940	AT2G32090.1 | Lactoylglutathione lyase / glyoxalase I family protein		LOC_Os03g45720.1 | glyoxalase family protein, putative, expressed		N/A		0	0	0	2	0	0	0	1	2	0	0	0	0	0	1	2	0	0
Bradi1g12950	AT4G14890.1 | 2Fe-2S ferredoxin-like superfamily protein		LOC_Os03g45710.1 | 2Fe-2S iron-sulfur cluster binding domain containing protein, expressed		N/A		0	0	0	0	0	0	0	1	0	0	0	0	2	0	0	0	1	0
Bradi1g12955	AT1G29860.1 | WRKY DNA-binding protein 71		LOC_Os03g45450.1 | WRKY60, expressed		N/A		0	0	0	1	0	0	0	0	1	0	0	0	1	0	0	0	0	0
Bradi1g12960	AT1G55520.1 | TATA binding protein 2		LOC_Os03g45410.1 | TATA-binding protein, putative, expressed		N/A		0	0	0	0	0	0	0	0	1	0	0	0	1	1	0	0	0	0
Bradi1g12970	AT4G32360.1 | Pyridine nucleotide-disulphide oxidoreductase family protein		LOC_Os02g17700.1 | pyridine nucleotide-disulphide oxidoreductase domain containing protein, expressed		N/A		0	3	3	0	0	2	0	0	4	0	0	0	2	0	1	1	0	0
Bradi1g12980	AT4G26370.1 | antitermination NusB domain-containing protein		LOC_Os03g45400.1 | antitermination NusB domain-containing protein, putative, expressed		N/A		0	1	1	1	0	0	0	0	0	0	0	0	2	0	1	1	0	0
Bradi1g12990	AT2G19440.1 | O-Glycosyl hydrolases family 17 protein		LOC_Os03g45390.1 | glucan endo-1,3-beta-glucosidase precursor, putative, expressed		N/A		0	0	0	0	0	0	0	0	2	0	0	0	1	0	0	0	0	0
Bradi1g13000	AT5G17860.1 | calcium exchanger 7		LOC_Os03g45370.1 | sodium/calcium exchanger protein, putative, expressed		N/A		0	1	0	0	0	2	0	0	1	0	0	0	0	0	1	2	0	0
Bradi1g13010	AT5G17840.1 | DnaJ/Hsp40 cysteine-rich domain superfamily protein		LOC_Os03g45344.1 | expressed protein		N/A		0	0	0	0	0	1	0	1	0	0	0	0	2	0	1	2	1	0
Bradi1g13020	AT5G04890.1 | HSP20-like chaperones superfamily protein		LOC_Os03g45340.1 | hsp20/alpha crystallin family protein, putative, expressed		N/A		0	0	0	0	0	1	0	1	1	0	0	1	2	0	1	1	1	0
Bradi1g13030	No hits found		No hits found		N/A		0	0	0	0	1	0	0	0	1	1	0	0	1	0	1	2	0	0
Bradi1g13040	AT5G20970.1 | HSP20-like chaperones superfamily protein		LOC_Os03g45330.1 | hsp20/alpha crystallin family protein, putative, expressed		N/A		0	1	0	2	0	2	1	0	0	0	0	0	1	0	1	4	0	0
Bradi1g13047	AT5G17920.2 | Cobalamin-independent synthase family protein,AT5G17920.1 | Cobalamin-independent synthase family protein		LOC_Os12g42884.2 | 5-methyltetrahydropteroyltriglutamate--homocysteine methyltransferase, putative, expressed,LOC_Os12g42884.3 | 5-methyltetrahydropteroyltriglutamate--homocysteine methyltransferase, putative, expressed		N/A		0	0	0	0	0	0	0	0	0	0	0	0	1	1	0	0	0	0
Bradi1g13060	No hits found		No hits found		N/A		0	0	0	0	0	0	1	0	1	0	0	0	2	0	1	2	0	0
Bradi1g13070	AT4G38180.1 | FAR1-related sequence 5		LOC_Os03g45300.1 | transposon protein, putative, unclassified, expressed		N/A		0	0	0	1	0	0	0	0	1	0	0	0	0	0	0	0	0	0
Bradi1g13080	No hits found		No hits found		N/A		0	0	0	0	0	0	0	0	0	0	0	0	0	2	1	3	0	0
Bradi1g13090	AT1G54410.1 | dehydrin family protein		LOC_Os03g45280.1 | dehydrin, putative, expressed		N/A		0	0	0	0	0	0	0	0	1	0	0	0	2	0	0	0	0	0
Bradi1g13097	AT3G03773.1 | HSP20-like chaperones superfamily protein		LOC_Os03g45270.1 | CS domain containing protein, putative, expressed		N/A		0	0	0	1	0	0	0	1	0	0	0	0	1	0	0	0	0	0
Bradi1g13110	AT2G36900.1 | membrin 11		LOC_Os03g45260.1 | vesicle transport v-SNARE protein, putative, expressed		N/A		0	0	0	0	0	0	0	0	0	0	0	0	2	0	1	3	0	0
Bradi1g13115	No hits found		No hits found		N/A		0	0	0	0	0	0	0	0	0	1	0	0	0	2	1	3	0	0
Bradi1g13121	No hits found		LOC_Os01g73640.1 | expressed protein		N/A		1	1	1	0	0	0	1	1	0	0	0	0	0	1	0	0	0	0
Bradi1g13127	AT1G79280.2 | nuclear pore anchor		No hits found		N/A		0	2	2	1	0	1	1	0	1	0	0	0	2	3	1	5	0	1
Bradi1g13140	No hits found		No hits found		N/A		0	0	0	1	0	2	0	0	2	0	0	0	0	0	1	3	0	0
Bradi1g13150	No hits found		No hits found		N/A		0	1	1	1	0	1	1	0	0	1	0	0	0	0	0	0	0	0
Bradi1g13160	No hits found		No hits found		N/A		0	0	0	0	0	0	0	0	0	0	0	0	0	0	1	2	0	0
Bradi1g13166	No hits found		LOC_Os01g73080.1 | expressed protein,LOC_Os01g73080.3 | expressed protein		LBD		0	1	1	1	0	1	0	2	1	0	0	0	3	2	1	2	2	0
Bradi1g13170	No hits found		LOC_Os01g72650.1 | RNA recognition motif containing protein, putative, expressed,LOC_Os01g73656.1 | expressed protein		N/A		1	0	0	0	0	0	0	0	0	1	0	0	0	0	0	0	0	0
Bradi1g13180	AT5G15120.1 | Protein of unknown function (DUF1637)		LOC_Os03g45210.1 | 2-aminoethanethiol dioxygenase, putative, expressed		N/A		0	0	0	0	0	0	0	0	2	0	0	0	0	1	1	1	0	0
Bradi1g13185	AT5G39890.1 | Protein of unknown function (DUF1637)		LOC_Os03g45250.1 | 2-aminoethanethiol dioxygenase, putative, expressed		N/A		0	0	0	0	0	1	0	0	0	0	0	0	0	0	0	0	2	0
Bradi1g13190	AT1G18490.1 | Protein of unknown function (DUF1637)		LOC_Os03g45210.1 | 2-aminoethanethiol dioxygenase, putative, expressed		N/A		0	0	0	0	1	0	0	1	1	0	0	0	0	0	1	3	1	0
Bradi1g13200	AT5G04900.1 | NYC1-like		LOC_Os03g45194.1 | oxidoreductase, short chain dehydrogenase/reductase family domain containing protein, expressed		N/A		0	0	0	0	0	1	1	0	0	0	0	0	0	1	1	2	0	1
Bradi1g13207	AT3G24120.1 | Homeodomain-like superfamily protein		LOC_Os03g45194.1 | oxidoreductase, short chain dehydrogenase/reductase family domain containing protein, expressed		WRKY		0	0	0	0	0	0	0	0	0	0	0	0	0	0	0	0	0	0
Bradi1g13220	AT1G28760.1 | Uncharacterized conserved protein (DUF2215)		LOC_Os03g45180.1 | expressed protein		N/A		1	1	0	1	0	1	0	0	1	0	0	0	1	1	0	0	1	0
Bradi1g13223	AT1G58030.1 | cationic amino acid transporter 2		LOC_Os03g45170.1 | amino acid permease, putative, expressed		N/A		0	2	1	0	0	0	0	0	0	0	0	0	1	0	0	0	1	0
Bradi1g13226	AT5G18230.1 | transcription regulator NOT2/NOT3/NOT5 family protein		LOC_Os03g44900.1 | CCR4-NOT transcription factor, putative, expressed		N/A		0	0	0	2	1	0	1	0	0	0	0	0	0	0	1	2	2	0
Bradi1g13232	AT3G03680.1 | C2 calcium/lipid-binding plant phosphoribosyltransferase family protein		LOC_Os03g44890.1 | anthranilate phosphoribosyltransferase, putative, expressed		N/A		0	0	0	0	1	0	1	0	2	0	0	0	0	0	0	0	0	0
Bradi1g13240	AT3G04440.1 | Plasma-membrane choline transporter family protein		LOC_Os03g44840.1 | choline transporter-related, putative, expressed		N/A		0	0	0	0	0	1	0	0	1	0	0	0	1	1	1	4	0	1
Bradi1g13250	No hits found		LOC_Os02g06215.1 | RNA-directed DNA polymerase, putative, expressed		N/A		0	0	0	0	0	2	1	0	0	0	0	0	2	0	0	0	0	0
Bradi1g13261	AT3G58460.1 | RHOMBOID-like protein 15,AT3G58460.2 | RHOMBOID-like protein 15		LOC_Os03g44830.1 | OsRhmbd9 - Putative Rhomboid homologue, expressed		N/A		0	0	0	0	0	0	0	2	0	0	0	0	1	0	0	0	0	0
Bradi1g13270	No hits found		LOC_Os01g50360.1 | NAC domain containing protein, putative, expressed		N/A		0	0	0	1	0	0	0	1	0	0	0	0	1	0	0	0	0	0
Bradi1g13280	AT4G32915.1 |		LOC_Os03g44820.1 | glutamyl-tRNA, putative, expressed		N/A		0	0	0	0	0	3	0	2	0	0	1	0	0	0	0	0	0	0
Bradi1g13290	AT2G38920.1 | SPX (SYG1/Pho81/XPR1) domain-containing protein / zinc finger (C3HC4-type RING finger) protein-related		LOC_Os03g44810.2 | expressed protein		N/A		0	1	0	0	0	0	0	0	0	0	0	0	0	4	0	0	0	0
Bradi1g13300	AT5G06560.1 | Protein of unknown function, DUF593		LOC_Os03g44800.1 | DUF593 domain containing protein, expressed		N/A		0	0	0	1	0	1	1	1	0	0	0	0	2	0	0	0	1	0
Bradi1g13310	AT4G29090.1 | Ribonuclease H-like superfamily protein		LOC_Os02g06215.1 | RNA-directed DNA polymerase, putative, expressed		FAR1		0	0	0	0	0	0	0	0	1	0	0	0	1	1	0	0	0	0
Bradi1g13322	AT5G50260.1 | Cysteine proteinases superfamily protein		LOC_Os08g44270.1 | vignain precursor, putative, expressed		N/A		0	0	0	1	1	1	0	0	0	0	0	0	1	1	0	0	0	0
Bradi1g13330	AT5G52610.1 | F-box and associated interaction domains-containing protein		LOC_Os03g46140.1 | OsFBX101 - F-box domain containing protein, expressed		N/A		0	1	1	0	0	1	0	0	0	0	0	0	1	2	0	0	0	0
Bradi1g13340	AT5G52610.1 | F-box and associated interaction domains-containing protein		LOC_Os03g46140.1 | OsFBX101 - F-box domain containing protein, expressed		N/A		1	0	0	0	0	0	1	0	1	0	0	0	0	0	1	5	0	0
Bradi1g13350	AT3G22980.1 | Ribosomal protein S5/Elongation factor G/III/V family protein		LOC_Os03g44780.1 | elongation factor Tu family protein, putative, expressed		N/A		0	0	0	2	0	0	0	0	0	0	0	0	0	0	0	0	2	0
Bradi1g13352	No hits found		No hits found		N/A		0	0	0	0	0	0	1	1	1	0	0	0	0	0	1	1	0	0
Bradi1g13354	AT5G51330.1 | SWITCH1		LOC_Os03g44760.1 | SWI1, putative, expressed		N/A		0	0	0	0	0	1	0	0	0	0	0	0	2	0	1	2	0	1
Bradi1g13356	No hits found		No hits found		N/A		0	0	0	0	0	0	0	0	0	0	0	0	2	0	1	1	0	0
Bradi1g13361	No hits found		LOC_Os05g16240.1 | expressed protein		N/A		0	1	0	0	0	0	0	0	2	0	0	0	0	0	1	2	0	0
Bradi1g13367	AT5G06380.1 |		LOC_Os03g44750.1 | pollen preferential protein, putative, expressed		N/A		0	0	0	0	0	0	0	0	0	0	0	0	1	0	0	0	0	0
Bradi1g13373	AT2G26580.1 | plant-specific transcription factor YABBY family protein,AT2G26580.2 | plant-specific transcription factor YABBY family protein		LOC_Os03g44710.1 | YABBY domain containing protein, putative, expressed,LOC_Os03g44710.2 | YABBY domain containing protein, putative, expressed		N/A		1	3	2	0	1	0	0	0	0	0	0	0	0	1	1	3	0	0
Bradi1g13380	AT3G11760.1 |		LOC_Os03g44670.1 | expressed protein		N/A		0	1	1	0	0	1	0	0	0	0	0	0	0	1	0	0	0	0
Bradi1g13387	AT2G38680.1 | 5\'-nucleotidases;magnesium ion binding		LOC_Os03g44660.1 | cytosolic 5-nucleotidase III, putative, expressed		N/A		0	0	0	0	0	0	0	0	1	0	0	0	2	1	1	4	0	0
Bradi1g13400	AT4G21720.1 |		LOC_Os04g58380.1 | expressed protein		N/A		0	0	0	0	0	0	1	0	0	0	0	0	1	0	1	2	0	1
Bradi1g13406	AT5G01420.1 | Glutaredoxin family protein		LOC_Os03g44650.1 | glutaredoxin, putative, expressed		N/A		0	0	0	0	0	1	1	0	0	0	0	0	1	0	1	4	0	1
Bradi1g13412	AT2G35910.1 | RING/U-box superfamily protein		LOC_Os03g44636.1 | zinc finger, C3HC4 type domain containing protein, expressed		N/A		0	0	0	0	0	0	0	0	2	0	0	1	2	0	1	4	0	2
Bradi1g13420	AT5G39740.1 | ribosomal protein L5 B		LOC_Os01g67134.1 | ribosomal L18p/L5e family protein, putative, expressed		N/A		0	1	0	0	0	1	0	1	0	0	0	0	0	0	1	1	1	1
Bradi1g13425	AT2G32300.1 | uclacyanin 1		LOC_Os03g44630.1 | plastocyanin-like domain containing protein, putative, expressed		G2-like		0	1	0	1	0	0	0	1	0	0	0	0	0	0	0	0	0	0
Bradi1g13430	AT5G22060.1 | DNAJ homologue 2		LOC_Os03g44620.2 | chaperone protein dnaJ, putative, expressed		N/A		0	0	0	0	1	1	1	0	0	1	0	0	1	1	0	0	0	1
Bradi1g13440	AT3G22190.2 | IQ-domain 5,AT3G22190.1 | IQ-domain 5		LOC_Os03g44610.1 | IQ calmodulin-binding motif domain containing protein, expressed		N/A		0	1	1	0	1	1	1	1	1	0	0	0	0	2	1	2	0	0
Bradi1g13450	AT3G52060.2 | Core-2/I-branching beta-1,6-N-acetylglucosaminyltransferase family protein		LOC_Os03g44580.1 | DNA binding protein, putative, expressed		N/A		0	1	0	0	0	0	0	0	1	0	0	0	1	2	0	0	0	0
Bradi1g13460	AT3G44150.1 |		LOC_Os03g44560.1 | expp1 protein precursor, putative, expressed		N/A		0	0	0	1	1	2	2	0	2	0	0	0	0	0	0	0	0	0
Bradi1g13470	AT3G05690.1 | nuclear factor Y, subunit A2		LOC_Os12g42400.3 | nuclear transcription factor Y subunit, putative, expressed		N/A		0	0	0	1	0	0	1	0	1	0	0	0	0	0	1	1	0	0
Bradi1g13475	AT1G08410.1 | P-loop containing nucleoside triphosphate hydrolases superfamily protein		LOC_Os03g44530.1 | GTPase of unknown function domain containing protein, putative, expressed		N/A		0	0	0	0	0	0	0	0	4	0	0	0	0	0	1	6	0	0
Bradi1g13480	AT1G14060.1 | GCK domain-containing protein		LOC_Os03g44520.1 | expressed protein		N/A		0	1	0	0	0	1	0	0	0	0	0	0	1	3	1	2	0	0
Bradi1g13485	AT2G27210.1 | BRI1 suppressor 1 (BSU1)-like 3		LOC_Os03g44500.1 | serine/threonine protein phosphatase, putative, expressed		N/A		0	0	0	1	0	0	0	0	0	0	0	0	2	1	0	0	1	0
Bradi1g13490	AT4G21710.1 | DNA-directed RNA polymerase family protein		LOC_Os03g44484.2 | DNA-directed RNA polymerase II subunit RPB2, putative, expressed		N/A		0	0	0	0	0	1	0	1	3	0	0	0	1	1	1	3	0	0
Bradi1g13500	AT3G29670.1 | HXXXD-type acyl-transferase family protein		LOC_Os02g28170.1 | transferase family protein, putative, expressed		N/A		1	0	0	1	1	2	0	0	0	0	0	0	2	0	1	5	1	1
Bradi1g13505	AT4G30560.1 | cyclic nucleotide gated channel 9		LOC_Os03g44440.1 | cyclic nucleotide-gated ion channel, putative, expressed		N/A		0	0	0	1	0	0	0	0	0	0	1	0	1	0	0	0	0	0
Bradi1g13510	AT1G71850.1 | Ubiquitin carboxyl-terminal hydrolase family protein		LOC_Os03g44430.1 | ubiquitin carboxyl-terminal hydrolase, family 1, putative, expressed		N/A		0	0	0	0	0	0	0	0	0	0	0	0	0	0	0	0	2	0
Bradi1g13512	AT1G78390.1 | nine-cis-epoxycarotenoid dioxygenase 9		LOC_Os03g44380.1 | 9-cis-epoxycarotenoid dioxygenase 1, chloroplast precursor, putative, expressed		N/A		1	0	0	0	1	1	0	0	3	0	0	0	0	0	1	5	0	0
Bradi1g13514	No hits found		No hits found		N/A		0	1	0	0	0	0	0	1	0	0	0	0	2	0	0	0	0	0
Bradi1g13516	AT5G38640.1 | NagB/RpiA/CoA transferase-like superfamily protein		LOC_Os03g44310.1 | initiation factor 2 subunit family domain containing protein, expressed		N/A		0	0	0	0	0	0	0	1	1	0	0	0	0	0	0	0	0	0
Bradi1g13520	AT2G34590.1 | Transketolase family protein		LOC_Os12g42230.1 | transketolase, putative, expressed		N/A		0	0	0	1	0	0	0	1	0	0	0	0	0	1	0	0	0	0
Bradi1g13525	AT2G45110.1 | expansin B4		LOC_Os03g44290.1 | expansin precursor, putative, expressed		N/A		0	0	0	0	0	0	0	1	0	0	0	0	0	0	1	1	1	0
Bradi1g13530	AT2G42800.1 | receptor like protein 29		LOC_Os05g45430.1 | TOO MANY MOUTHS precursor, putative, expressed		N/A		0	1	0	1	0	1	0	0	0	0	0	0	0	1	1	5	0	0
Bradi1g13541	No hits found		No hits found		N/A		0	0	0	1	2	2	0	0	0	0	0	0	1	2	1	6	1	0
Bradi1g13550	AT1G30190.1 |		LOC_Os12g42220.1 | expressed protein		N/A		0	0	0	0	0	0	0	0	1	1	0	0	0	0	1	1	0	0
Bradi1g13560	AT1G17170.1 | glutathione S-transferase TAU 24		LOC_Os03g44170.1 | glutathione S-transferase, putative, expressed		N/A		0	0	0	0	0	1	0	0	0	0	0	0	0	0	1	4	0	0
Bradi1g13570	AT1G47710.1 | Serine protease inhibitor (SERPIN) family protein		LOC_Os01g56010.1 | serpin domain containing protein, putative, expressed		YABBY		0	0	0	0	0	1	0	0	0	0	0	0	0	1	0	0	0	0
Bradi1g13580	AT1G69560.1 | myb domain protein 105		LOC_Os08g33800.1 | MYB family transcription factor, putative, expressed		N/A		0	0	0	0	0	0	0	0	0	0	0	0	1	2	0	0	0	0
Bradi1g13590	AT5G46180.1 | ornithine-delta-aminotransferase		LOC_Os03g44150.1 | aminotransferase, putative, expressed		N/A		0	0	0	0	0	1	1	0	0	0	0	0	0	0	0	0	2	0
Bradi1g13600	No hits found		LOC_Os12g42170.1 | expressed protein		N/A		0	0	0	0	0	0	0	0	1	0	0	0	0	1	1	2	0	0
Bradi1g13610	AT1G30300.1 | Metallo-hydrolase/oxidoreductase superfamily protein		LOC_Os03g44140.1 | OsWAK26 - OsWAK receptor-like protein kinase, expressed		N/A		0	0	0	0	0	0	0	0	0	0	0	0	0	0	0	0	0	0
Bradi1g13620	No hits found		No hits found		N/A		0	0	0	1	0	0	0	0	0	0	0	0	0	0	1	1	0	0
Bradi1g13630	AT5G27640.1 | translation initiation factor 3B1		LOC_Os10g41960.1 | eukaryotic translation initiation factor 3 subunit B, putative, expressed		N/A		0	2	0	0	2	1	0	0	2	0	0	0	0	0	0	0	0	0
Bradi1g13635	AT2G34650.1 | Protein kinase superfamily protein		LOC_Os03g44020.1 | AGC_PVPK_like_kin82y.9 - ACG kinases include homologs to PKA, PKG and PKC, expressed		N/A		0	0	0	0	0	0	0	0	2	0	0	0	1	1	1	1	0	0
Bradi1g13640	AT5G12230.1 |		LOC_Os03g44010.2 | nucleolar protein NOP5, putative, expressed		N/A		0	0	0	0	0	0	0	0	3	0	0	0	1	0	1	9	0	0
Bradi1g13650	No hits found		No hits found		N/A		0	0	0	0	0	0	0	0	2	0	0	0	0	1	0	0	0	0
Bradi1g13660	AT1G49950.2 | telomere repeat binding factor 1		LOC_Os12g41920.2 | single myb histone, putative, expressed		N/A		0	1	1	1	0	1	0	1	0	2	1	0	2	2	0	0	0	0
Bradi1g13670	AT1G30440.1 | Phototropic-responsive NPH3 family protein		LOC_Os03g43990.1 | BTBN8 - Bric-a-Brac, Tramtrack, Broad Complex BTB domain with non-phototropic hypocotyl 3 NPH3 and coiled-coil domains, expressed,LOC_Os03g43990.2 | BTBN8 - Bric-a-Brac, Tramtrack, Broad Complex BTB domain with non-phototropic hypocotyl 3 NPH3 and coiled-coil domains, expressed		N/A		0	0	0	0	0	0	0	0	0	0	0	0	2	2	0	0	0	0
Bradi1g13680	AT4G21120.1 | amino acid transporter 1		LOC_Os12g41890.1 | amino acid permease family protein, putative, expressed		NF-YA		0	0	0	1	0	0	0	0	1	0	0	0	1	1	0	0	0	0
Bradi1g13690	No hits found		No hits found		N/A		0	0	0	0	0	1	0	0	1	0	0	0	1	1	0	0	0	0
Bradi1g13700	AT2G34710.1 | Homeobox-leucine zipper family protein / lipid-binding START domain-containing protein		LOC_Os03g43930.2 | START domain containing protein, expressed		N/A		0	0	0	1	0	0	0	0	0	0	0	0	2	0	0	0	0	0
Bradi1g13710	AT3G29130.2 |		LOC_Os03g43910.1 | expressed protein		N/A		0	0	0	0	0	0	0	0	0	0	0	0	0	2	1	2	0	0
Bradi1g13720	AT5G58230.1 | Transducin/WD40 repeat-like superfamily protein		LOC_Os03g43890.1 | WD domain, G-beta repeat domain containing protein, expressed		N/A		0	1	1	1	0	2	0	0	2	0	0	0	1	1	0	0	0	0
Bradi1g13730	AT3G54950.1 | patatin-like protein 6		LOC_Os03g43880.1 | PLA IIIA/PLP7, putative, expressed		N/A		0	0	0	0	0	0	0	0	2	0	0	0	1	1	1	2	0	0
Bradi1g13740	AT5G44560.1 | SNF7 family protein		LOC_Os03g43860.1 | SNF7 domain containing protein, putative, expressed		N/A		0	0	0	0	0	0	0	0	2	0	0	0	1	1	1	13	0	0
Bradi1g13750	AT1G79050.1 | recA DNA recombination family protein		LOC_Os03g43850.1 | recA protein, putative, expressed		N/A		0	2	0	0	0	0	0	0	0	0	0	0	1	0	1	7	0	0
Bradi1g13760	No hits found		LOC_Os09g15410.1 | retrotransposon protein, putative, unclassified		N/A		0	1	0	1	1	1	0	0	1	0	0	0	1	0	1	1	2	0
Bradi1g13765	AT1G32540.1 | lsd one like 1,AT4G20380.2 | LSD1 zinc finger family protein		LOC_Os03g43840.1 | LSD1 zinc finger domain containing protein, expressed		N/A		0	1	0	0	1	0	0	0	2	0	0	0	0	0	1	12	0	0
Bradi1g13770	No hits found		No hits found		N/A		0	0	0	0	0	0	0	1	2	0	0	0	1	0	1	2	0	0
Bradi1g13777	AT2G20180.2 | phytochrome interacting factor 3-like 5		LOC_Os03g43810.1 | helix-loop-helix DNA-binding domain containing protein, expressed		N/A		0	0	0	0	0	0	0	0	1	0	0	0	0	1	0	0	1	0
Bradi1g13787	No hits found		No hits found		N/A		0	1	0	0	0	0	0	0	2	0	0	0	0	2	1	1	0	0
Bradi1g13793	No hits found		LOC_Os12g41640.1 | expressed protein		N/A		0	2	2	0	0	0	1	0	0	0	0	0	0	2	1	4	2	2
Bradi1g13796	No hits found		No hits found		N/A		0	0	0	0	0	1	0	0	0	0	0	0	0	1	0	0	0	0
Bradi1g13800	AT3G48880.2 | RNI-like superfamily protein		LOC_Os03g43770.1 | OsFBX97 - F-box domain containing protein, expressed		N/A		0	0	0	0	2	0	0	0	0	0	0	0	1	0	1	4	0	0
Bradi1g13807	No hits found		LOC_Os08g30120.1 | transposon protein, putative, CACTA, En/Spm sub-class, expressed		N/A		0	0	0	0	1	0	1	1	1	0	0	0	0	0	1	1	0	1
Bradi1g13820	AT3G22750.1 | Protein kinase superfamily protein		LOC_Os03g43760.1 | protein kinase domain containing protein, expressed		N/A		0	1	0	0	0	1	1	0	1	0	1	0	0	0	0	0	1	0
Bradi1g13823	AT1G40390.1 | DNAse I-like superfamily protein		LOC_Os12g43900.1 | retrotransposon protein, putative, LINE subclass, expressed		N/A		0	0	0	0	0	0	0	0	2	0	0	0	0	0	1	12	0	0
Bradi1g13827	AT3G22750.1 | Protein kinase superfamily protein		LOC_Os03g43760.1 | protein kinase domain containing protein, expressed		N/A		0	0	0	0	0	2	0	0	0	0	0	0	1	0	1	5	0	1
Bradi1g13833	AT1G75880.2 | SGNH hydrolase-type esterase superfamily protein		LOC_Os06g24404.1 | GDSL-like lipase/acylhydrolase, putative, expressed		N/A		0	0	0	0	0	0	0	0	0	0	0	0	0	0	1	1	0	0
Bradi1g13840	AT3G13050.1 | Major facilitator superfamily protein		LOC_Os03g43720.1 | transporter family protein, putative, expressed,LOC_Os03g43720.2 | transporter family protein, putative, expressed,LOC_Os03g43720.4 | transporter family protein, putative, expressed,LOC_Os03g43720.3 | transporter family protein, putative, expressed		N/A		0	1	1	0	0	0	0	0	1	0	0	0	0	0	1	10	0	0
Bradi1g13845	AT3G13050.1 | Major facilitator superfamily protein		LOC_Os03g43720.2 | transporter family protein, putative, expressed,LOC_Os03g43720.4 | transporter family protein, putative, expressed,LOC_Os03g43720.3 | transporter family protein, putative, expressed		N/A		0	0	0	1	0	0	0	0	2	0	0	0	2	0	0	0	0	0
Bradi1g13850	AT3G22800.1 | Leucine-rich repeat (LRR) family protein		LOC_Os03g43650.1 | uncharacterized protein At4g06744 precursor, putative, expressed		N/A		0	0	0	0	0	0	0	0	1	0	0	0	0	0	1	2	0	0
Bradi1g13857	AT4G21380.1 | receptor kinase 3		LOC_Os03g35600.1 | serine/threonine-protein kinase receptor precursor, putative, expressed		N/A		0	0	0	0	1	4	1	1	0	0	0	0	0	0	1	1	0	0
Bradi1g13862	AT3G04810.1 | NIMA-related kinase 2,AT3G04810.2 | NIMA-related kinase 2		LOC_Os12g41180.1 | LSTK-1-like kinase, putative, expressed		N/A		0	0	0	0	1	0	0	0	0	0	0	0	0	0	0	0	0	0
Bradi1g13868	AT3G63470.1 | serine carboxypeptidase-like 40		LOC_Os09g28840.1 | OsSCP43 - Putative Serine Carboxypeptidase homologue, expressed		N/A		0	0	0	0	0	0	0	1	0	0	0	0	1	0	1	1	0	0
Bradi1g13879	AT4G14750.1 | IQ-domain 19		LOC_Os03g43580.1 | IQ calmodulin-binding motif family protein, putative, expressed		MYB_related		0	0	0	3	0	0	0	0	1	0	0	0	0	1	0	0	0	0
Bradi1g13890	No hits found		No hits found		N/A		0	0	0	0	0	0	0	1	0	0	0	0	1	0	0	0	2	0
Bradi1g13900	No hits found		No hits found		N/A		0	2	1	1	1	0	0	1	0	0	1	0	0	2	1	2	0	0
Bradi1g13905	AT3G22810.1 | Plant protein of unknown function (DUF828) with plant pleckstrin homology-like region		LOC_Os03g43510.1 | expressed protein		N/A		0	0	0	1	0	1	0	0	0	0	0	0	1	1	1	1	0	0
Bradi1g13910	AT3G08890.2 | Protein of unknown function, DUF538		LOC_Os05g27950.1 | DUF538 domain containing protein, putative, expressed		HD-ZIP		0	0	0	0	0	2	0	0	0	0	0	0	2	1	0	0	0	0
Bradi1g13920	AT5G05460.1 | Glycosyl hydrolase family 85 ,AT3G11040.1 | Glycosyl hydrolase family 85		LOC_Os05g27960.1 | hydrolase, acting on glycosyl bonds, putative, expressed		N/A		0	0	0	0	1	0	0	3	0	0	0	1	2	1	0	0	0	0
Bradi1g13930	AT3G22942.1 | G-protein gamma subunit 2,AT3G63420.1 | Ggamma-subunit 1		LOC_Os02g04520.1 | AGG2, putative, expressed		N/A		0	0	0	0	0	0	1	0	1	0	0	0	2	1	1	1	1	0
Bradi1g13940	AT1G11260.1 | sugar transporter 1		LOC_Os07g01560.1 | transporter family protein, putative, expressed		N/A		0	1	0	1	2	3	2	0	0	0	0	0	0	0	1	11	0	0
Bradi1g13950	AT2G42920.1 | Pentatricopeptide repeat (PPR-like) superfamily protein		LOC_Os03g43470.1 | pentatricopeptide, putative, expressed		N/A		0	0	0	1	0	0	0	1	0	0	0	0	0	0	1	2	1	0
Bradi1g13960	AT5G44300.1 | Dormancy/auxin associated family protein,AT2G33830.1 | Dormancy/auxin associated family protein		LOC_Os11g44810.2 | auxin-repressed protein, putative, expressed,LOC_Os11g44810.1 | auxin-repressed protein, putative, expressed		N/A		0	0	0	0	1	0	0	0	0	0	0	0	1	0	0	0	1	0
Bradi1g13966	No hits found		No hits found		N/A		0	0	0	0	0	1	0	0	2	0	0	0	0	0	0	0	0	0
Bradi1g13971	AT3G47680.1 | DNA binding		LOC_Os10g27370.1 | transposon protein, putative, Pong sub-class, expressed		LSD		0	0	0	1	1	1	1	0	1	0	0	0	2	0	0	0	1	0
Bradi1g13973	AT3G22470.1 | Pentatricopeptide repeat (PPR) superfamily protein		LOC_Os04g28234.1 | Rf1, mitochondrial precursor, putative, expressed		N/A		0	0	0	0	1	0	0	0	0	0	0	1	3	0	1	1	0	1
Bradi1g13976	AT4G14580.1 | CBL-interacting protein kinase 4		LOC_Os03g43440.1 | CAMK_KIN1/SNF1/Nim1_like.17 - CAMK includes calcium/calmodulin depedent protein kinases, expressed		N/A		0	0	0	0	0	0	0	1	0	0	0	0	0	1	1	2	1	1
Bradi1g13980	AT5G28750.1 | Bacterial sec-independent translocation protein mttA/Hcf106		LOC_Os03g43430.1 | mttA/Hcf106 family protein, putative, expressed		bHLH		0	1	0	0	1	0	0	0	0	0	0	0	0	1	1	9	0	0
Bradi1g13983	AT1G47720.1 | Primosome PriB/single-strand DNA-binding		LOC_Os03g43420.1 | single-stranded DNA-binding protein, putative, expressed		N/A		0	2	0	1	0	0	0	0	0	0	0	0	1	0	1	5	1	0
Bradi1g13986	AT4G14560.1 | indole-3-acetic acid inducible		LOC_Os03g43410.1 | OsIAA12 - Auxin-responsive Aux/IAA gene family member, expressed		N/A		1	3	0	0	0	0	0	0	1	0	0	0	2	0	1	1	0	0
Bradi1g13990	AT1G04250.1 | AUX/IAA transcriptional regulator family protein		LOC_Os03g43400.1 | OsIAA11 - Auxin-responsive Aux/IAA gene family member, expressed		N/A		0	0	0	0	2	0	2	0	1	0	0	0	1	1	0	0	2	0
Bradi1g13995	AT3G54650.1 | RNI-like superfamily protein		LOC_Os03g43390.1 | F-box/LRR domain containing protein, putative, expressed,LOC_Os03g43390.4 | F-box/LRR domain containing protein, putative, expressed,LOC_Os03g43390.3 | F-box/LRR domain containing protein, putative, expressed		N/A		0	0	0	0	0	0	0	0	0	0	0	0	0	0	1	4	0	0
Bradi1g14000	AT5G12110.1 | Glutathione S-transferase, C-terminal-like;Translation elongation factor EF1B/ribosomal protein S6		LOC_Os07g42300.1 | elongation factor protein, putative, expressed		N/A		0	1	0	0	1	0	1	0	0	0	0	0	0	0	0	0	0	0
Bradi1g14005	AT2G30580.1 | DREB2A-interacting protein 2		LOC_Os03g43360.2 | zinc finger, C3HC4 type domain containing protein, expressed		N/A		0	0	0	0	0	0	0	0	1	0	0	0	0	0	0	0	0	0
Bradi1g14010	AT1G08780.1 | ABI3-interacting protein 3		LOC_Os03g43020.1 | prefoldin subunit, putative, expressed		N/A		0	0	0	0	1	0	1	2	0	0	0	0	0	0	1	1	0	0
Bradi1g14020	AT2G30590.1 | WRKY DNA-binding protein 21		LOC_Os12g40570.2 | WRKY94, expressed		N/A		0	2	1	1	0	1	0	0	1	0	0	0	2	0	1	6	0	0
Bradi1g14030	AT2G30630.1 | P-loop containing nucleoside triphosphate hydrolases superfamily protein		LOC_Os03g43010.1 | expressed protein		N/A		0	0	0	0	1	1	0	0	0	0	0	0	0	1	1	3	0	0
Bradi1g14040	AT3G04610.1 | RNA-binding KH domain-containing protein		LOC_Os03g42900.1 | KH domain containing protein, putative, expressed		N/A		0	1	0	0	1	0	1	0	2	1	0	0	0	1	1	1	0	1
Bradi1g14050	No hits found		LOC_Os10g03490.1 | expressed protein		N/A		0	0	0	0	0	1	0	0	0	1	0	0	0	1	1	1	1	0
Bradi1g14060	AT3G07870.1 | F-box and associated interaction domains-containing protein		LOC_Os02g35560.1 | OsFBX53 - F-box domain containing protein, expressed		N/A		0	0	0	1	0	0	0	1	2	0	0	0	2	0	1	2	2	0
Bradi1g14070	AT4G19540.1 | IND1(iron-sulfur protein required for NADH dehydrogenase)-like		LOC_Os03g42880.1 | nucleotide-binding protein-like, putative, expressed		N/A		0	4	0	0	0	1	0	0	1	0	0	0	1	0	1	6	0	0
Bradi1g14080	No hits found		LOC_Os10g03490.1 | expressed protein		N/A		0	0	0	2	0	0	0	0	2	0	0	0	0	1	0	0	0	0
Bradi1g14090	No hits found		No hits found		N/A		0	0	0	1	0	0	0	0	1	0	0	0	1	1	1	8	0	0
Bradi1g14093	AT3G26590.1 | MATE efflux family protein		LOC_Os03g42830.1 | MATE efflux family protein, putative, expressed		N/A		0	0	0	0	0	0	0	1	2	0	0	0	0	0	1	2	0	0
Bradi1g14101	AT4G36860.1 | LIM domain-containing protein		LOC_Os03g42820.2 | LIM domain-containing protein, putative, expressed,LOC_Os03g42820.1 | LIM domain-containing protein, putative, expressed		N/A		0	0	0	0	0	0	0	0	1	0	0	0	3	0	1	1	0	0
Bradi1g14110	AT1G47510.1 | inositol polyphosphate 5-phosphatase 11		LOC_Os03g42810.1 | endonuclease/exonuclease/phosphatase family domain containing protein, expressed		N/A		0	0	0	0	1	1	0	0	0	0	0	0	1	2	1	1	0	0
Bradi1g14117	AT1G49410.1 | translocase of the outer mitochondrial membrane 6		LOC_Os03g42799.1 | expressed protein		N/A		0	0	0	0	0	0	0	0	1	0	0	0	1	1	0	0	0	0
Bradi1g14127	AT4G34370.1 | RING/U-box superfamily protein		LOC_Os03g42760.1 | zinc finger protein-related, putative, expressed		N/A		0	0	0	0	0	0	1	0	2	0	0	0	1	0	0	0	0	0
Bradi1g14140	AT3G10530.1 | Transducin/WD40 repeat-like superfamily protein		LOC_Os01g08770.1 | WD domain, G-beta repeat domain containing protein, expressed		N/A		0	1	0	0	0	0	0	0	1	0	0	0	0	2	0	0	0	2
Bradi1g14150	AT5G55070.1 | Dihydrolipoamide succinyltransferase		LOC_Os04g32330.1 | dihydrolipoyllysine-residue succinyltransferase component of 2-oxoglutarate dehydrogenase complex, mitochondrial precursor, putative, expressed		N/A		0	0	0	1	0	2	0	0	0	0	0	0	0	2	1	1	0	0
Bradi1g14160	AT4G25180.1 | RNA polymerase III RPC4,AT5G09380.1 | RNA polymerase III RPC4		LOC_Os04g32350.1 | RNA polymerase III RPC4 domain containing protein, expressed		N/A		0	0	0	0	0	0	0	0	1	0	0	0	1	0	0	0	0	0
Bradi1g14170	No hits found		No hits found		N/A		0	0	0	0	0	1	0	0	1	0	0	0	0	0	0	0	0	0
Bradi1g14181	No hits found		No hits found		N/A		0	0	0	0	0	0	0	1	0	0	0	0	1	1	0	0	0	0
Bradi1g14186	AT4G34370.1 | RING/U-box superfamily protein		LOC_Os03g42760.1 | zinc finger protein-related, putative, expressed		N/A		0	2	0	0	2	1	1	0	0	0	0	0	0	1	1	6	1	0
Bradi1g14190	AT4G34370.1 | RING/U-box superfamily protein		LOC_Os03g42760.1 | zinc finger protein-related, putative, expressed		N/A		0	0	0	0	1	0	2	0	0	0	0	0	2	0	1	1	0	0
Bradi1g14200	No hits found		No hits found		N/A		0	0	0	0	0	1	0	0	1	0	0	0	0	1	1	3	0	0
Bradi1g14210	AT1G47550.1 | exocyst complex component sec3A		LOC_Os03g42750.1 | roothairless 1, putative, expressed		N/A		0	1	1	0	0	1	0	0	0	0	0	0	1	1	1	1	0	0
Bradi1g14220	No hits found		No hits found		N/A		0	0	0	0	0	2	0	0	0	0	0	0	0	1	0	0	0	0
Bradi1g14230	AT4G34380.1 | Transducin/WD40 repeat-like superfamily protein		LOC_Os03g42710.1 | WD-40 repeat family protein, putative, expressed		N/A		1	0	0	1	0	0	0	0	0	0	0	0	0	0	1	4	0	0
Bradi1g14240	AT3G18400.1 | NAC domain containing protein 58		LOC_Os03g42630.1 | No apical meristem protein, putative, expressed		N/A		0	0	0	0	0	0	0	0	2	0	0	0	1	1	1	1	0	0
Bradi1g14250	AT5G42630.1 | Homeodomain-like superfamily protein		LOC_Os03g55760.1 | MYB family transcription factor, putative, expressed		N/A		0	0	0	0	1	0	0	0	1	0	0	0	0	1	0	0	0	0
Bradi1g14260	No hits found		No hits found		N/A		0	1	0	1	0	0	0	0	1	0	0	0	0	2	0	0	0	0
Bradi1g14270	AT2G15000.4 | ,AT2G15000.5 |		LOC_Os03g42480.1 | expressed protein,LOC_Os03g42480.2 | expressed protein		N/A		0	0	0	0	1	1	0	0	0	0	0	0	0	0	0	0	0	0
Bradi1g14290	AT4G33280.1 | AP2/B3-like transcriptional factor family protein		LOC_Os03g42430.1 | B3 DNA binding domain containing protein, expressed		N/A		0	0	0	2	0	0	0	0	0	0	0	0	1	0	0	0	0	0
Bradi1g14300	No hits found		LOC_Os01g08490.1 | conserved hypothetical protein		WRKY		0	0	0	0	1	0	1	0	0	0	0	0	0	2	0	0	2	0
Bradi1g14307	AT4G33280.1 | AP2/B3-like transcriptional factor family protein		LOC_Os03g42410.1 | B3 DNA binding domain containing protein		N/A		0	0	0	0	0	0	0	0	2	0	0	0	0	2	1	1	1	0
Bradi1g14320	No hits found		No hits found		N/A		0	1	0	0	0	1	0	0	0	0	0	0	1	0	0	0	0	0
Bradi1g14325	AT4G33280.1 | AP2/B3-like transcriptional factor family protein		LOC_Os08g23570.1 | B3 DNA binding domain containing protein, expressed		N/A		0	0	0	0	0	1	0	0	0	1	0	0	0	0	1	1	0	0
Bradi1g14330	No hits found		No hits found		N/A		0	1	0	1	0	1	0	1	1	0	0	0	0	0	1	3	0	0
Bradi1g14340	AT3G18990.1 | AP2/B3-like transcriptional factor family protein		LOC_Os08g23570.1 | B3 DNA binding domain containing protein, expressed		N/A		0	1	0	0	1	2	0	0	0	0	0	0	1	0	1	1	1	0
Bradi1g14343	AT3G11290.1 |		LOC_Os04g16940.1 | transposon protein, putative, CACTA, En/Spm sub-class, expressed		N/A		0	0	0	0	0	0	0	0	0	0	0	0	0	1	0	0	1	0
Bradi1g14346	AT3G18990.1 | AP2/B3-like transcriptional factor family protein		LOC_Os03g42280.1 | B3 DNA binding domain containing protein, expressed		N/A		0	1	0	0	0	0	0	0	2	0	0	0	0	0	1	1	0	0
Bradi1g14350	AT5G22540.1 | Plant protein of unknown function (DUF247)		LOC_Os11g17720.1 | plant protein of unknown function domain containing protein, expressed		N/A		0	1	1	0	0	0	0	0	0	0	0	0	3	1	0	0	1	0
Bradi1g14360	No hits found		LOC_Os07g31680.1 | OsFBL38 - F-box domain and LRR containing protein, expressed		N/A		0	0	0	0	0	0	0	0	0	0	0	0	1	1	0	0	0	0
Bradi1g14370	AT4G33280.1 | AP2/B3-like transcriptional factor family protein		LOC_Os03g42230.1 | B3 DNA binding domain containing protein, expressed		N/A		0	0	0	0	0	0	0	0	2	0	0	0	1	0	1	2	0	0
Bradi1g14380	No hits found		LOC_Os05g09290.1 | expressed protein		N/A		0	0	0	0	0	1	0	0	1	0	0	0	2	0	0	0	0	0
Bradi1g14391	No hits found		LOC_Os01g34410.1 | transposon protein, putative, Pong sub-class, expressed		N/A		0	0	0	0	0	0	0	0	1	0	0	0	1	0	1	5	0	0
Bradi1g14400	No hits found		No hits found		N/A		0	0	0	0	0	1	0	0	0	0	0	0	0	0	0	0	0	1
Bradi1g14410	AT4G00260.1 | Transcriptional factor B3 family protein,AT4G33280.1 | AP2/B3-like transcriptional factor family protein,AT3G18990.1 | AP2/B3-like transcriptional factor family protein		LOC_Os03g42280.1 | B3 DNA binding domain containing protein, expressed,LOC_Os03g42230.1 | B3 DNA binding domain containing protein, expressed		N/A		0	0	0	0	0	0	0	0	0	0	0	0	1	0	1	1	1	0
Bradi1g14420	No hits found		No hits found		N/A		0	0	0	1	0	0	0	0	0	0	0	0	1	1	0	0	1	0
Bradi1g14421	No hits found		No hits found		N/A		0	0	0	1	1	1	0	1	0	0	0	0	1	0	1	1	0	0
Bradi1g14422	AT3G61850.4 | Dof-type zinc finger DNA-binding family protein		LOC_Os03g42200.1 | dof zinc finger domain containing protein, putative, expressed		N/A		0	0	0	0	1	2	0	0	1	0	0	0	0	1	1	1	0	0
Bradi1g14425	No hits found		LOC_Os04g07590.1 | retrotransposon protein, putative, LINE subclass, expressed		N/A		0	0	0	0	0	1	0	0	1	0	0	0	1	0	0	0	0	0
Bradi1g14430	No hits found		LOC_Os02g25310.1 | zinc knuckle family protein, expressed		N/A		0	0	0	0	0	0	0	1	0	0	0	0	1	2	0	0	0	0
Bradi1g14440	AT3G19000.1 | 2-oxoglutarate (2OG) and Fe(II)-dependent oxygenase superfamily protein		LOC_Os03g42130.1 | gibberellin 20 oxidase 2, putative, expressed		N/A		0	0	0	0	0	0	0	0	0	0	0	0	0	2	0	0	0	0
Bradi1g14450	AT2G19940.2 | oxidoreductases, acting on the aldehyde or oxo group of donors, NAD or NADP as acceptor;copper ion binding		LOC_Os03g42110.1 | semialdehyde dehydrogenase, NAD binding domain containing protein, putative, expressed		N/A		0	0	0	0	1	0	0	0	0	0	0	0	2	0	1	1	1	0
Bradi1g14455	AT2G14760.1 | basic helix-loop-helix (bHLH) DNA-binding superfamily protein		LOC_Os03g42100.1 | helix-loop-helix DNA-binding domain containing protein, expressed		N/A		0	0	0	0	0	0	0	1	1	0	0	0	0	0	0	0	0	0
Bradi1g14460	AT4G37630.2 | cyclin d5;1		LOC_Os03g42070.1 | cyclin, putative, expressed		N/A		0	0	0	2	0	0	1	1	0	0	0	0	1	0	1	3	0	0
Bradi1g14467	No hits found		No hits found		NAC		0	2	1	0	1	0	0	1	0	0	0	0	2	0	0	0	0	1
Bradi1g14480	AT3G53220.1 | Thioredoxin superfamily protein		LOC_Os04g47260.1 | expressed protein		G2-like		0	1	1	1	0	0	0	0	0	0	0	0	0	2	1	1	1	0
Bradi1g14483	No hits found		No hits found		N/A		0	0	0	1	0	2	0	0	0	0	0	0	0	0	0	0	0	2
Bradi1g14486	AT1G64960.1 | ARM repeat superfamily protein		LOC_Os03g42040.1 | HEAT repeat family protein, putative, expressed		N/A		0	0	0	1	0	0	0	0	1	0	0	0	0	0	1	1	0	1
Bradi1g14492	AT4G37640.1 | calcium ATPase 2		LOC_Os03g42020.1 | calcium-transporting ATPase, plasma membrane-type, putative, expressed		N/A		0	0	0	1	0	1	0	0	1	0	0	1	1	0	0	0	0	0
Bradi1g14493	AT2G46760.1 | D-arabinono-1,4-lactone oxidase family protein		LOC_Os03g36530.1 | FAD-binding and arabino-lactone oxidase domains containing protein, putative, expressed		N/A		3	2	2	0	0	0	0	0	1	0	0	0	0	0	1	3	0	0
Bradi1g14495	AT1G49980.1 | DNA/RNA polymerases superfamily protein		LOC_Os03g42010.2 | DNA-directed polymerase, putative, expressed		B3		0	0	0	0	1	2	0	0	1	0	0	0	1	0	0	0	0	0
Bradi1g14497	AT5G66860.1 | Ribosomal protein L25/Gln-tRNA synthetase, anti-codon-binding domain		LOC_Os03g41612.1 | ribosomal protein L25, putative, expressed		N/A		0	1	0	0	0	0	0	0	3	0	0	0	2	0	1	3	0	0
Bradi1g14500	AT5G66870.1 | ASYMMETRIC LEAVES 2-like 1		LOC_Os03g41600.1 | DUF260 domain containing protein, putative, expressed		B3		0	0	0	0	0	0	0	0	0	0	0	0	0	1	1	3	0	0
Bradi1g14505	AT1G47720.1 | Primosome PriB/single-strand DNA-binding		LOC_Os03g41530.1 | single-stranded DNA-binding protein, putative, expressed,LOC_Os03g41530.2 | single-stranded DNA-binding protein, putative, expressed		N/A		0	0	0	0	0	0	0	0	0	0	0	0	0	0	1	2	1	0
Bradi1g14510	AT1G04420.1 | NAD(P)-linked oxidoreductase superfamily protein		LOC_Os03g41510.1 | oxidoreductase, aldo/keto reductase family protein, putative, expressed,LOC_Os03g41510.2 | oxidoreductase, aldo/keto reductase family protein, putative, expressed		B3		0	1	1	0	0	0	1	0	1	0	0	0	0	1	1	3	0	0
Bradi1g14517	AT1G04420.1 | NAD(P)-linked oxidoreductase superfamily protein		LOC_Os03g41510.1 | oxidoreductase, aldo/keto reductase family protein, putative, expressed		N/A		0	1	0	1	0	0	0	1	1	0	0	0	0	0	1	3	0	0
Bradi1g14530	AT4G33950.1 | Protein kinase superfamily protein		LOC_Os03g41460.1 | CAMK_CAMK_like.20 - CAMK includes calcium/calmodulin depedent protein kinases, expressed		B3		0	0	0	0	1	0	1	0	0	0	0	0	0	2	0	0	2	0
Bradi1g14536	AT1G47710.1 | Serine protease inhibitor (SERPIN) family protein		LOC_Os03g41438.1 | serpin domain containing protein, putative, expressed		N/A		1	1	0	1	0	0	0	2	0	0	0	0	1	1	1	1	2	0
Bradi1g14542	AT1G47710.1 | Serine protease inhibitor (SERPIN) family protein		LOC_Os03g41438.1 | serpin domain containing protein, putative, expressed		N/A		0	0	0	0	0	0	0	0	2	0	0	0	0	0	0	0	0	0
Bradi1g14550	No hits found		No hits found		B3		0	1	0	0	0	0	1	0	1	0	0	0	0	0	1	8	1	0
Bradi1g14553	AT1G27730.1 | salt tolerance zinc finger		LOC_Os03g41390.1 | ZOS3-15 - C2H2 zinc finger protein, expressed		N/A		0	0	0	0	0	0	0	2	0	0	0	0	2	0	1	7	0	0
Bradi1g14556	AT2G01390.1 | Tetratricopeptide repeat (TPR)-like superfamily protein		LOC_Os10g21470.1 | pentatricopeptide, putative, expressed		N/A		0	1	1	0	0	0	0	0	0	0	0	0	2	0	1	6	0	0
Bradi1g14558	AT2G14820.1 | Phototropic-responsive NPH3 family protein		LOC_Os03g41350.1 | BTBN7 - Bric-a-Brac, Tramtrack, Broad Complex BTB domain with non-phototropic hypocotyl 3 NPH3 domain, expressed,LOC_Os03g41350.2 | BTBN7 - Bric-a-Brac, Tramtrack, Broad Complex BTB domain with non-phototropic hypocotyl 3 NPH3 domain, expressed		N/A		0	0	0	0	1	0	2	0	1	0	0	0	0	0	1	4	0	0
Bradi1g14560	AT3G49940.1 | LOB domain-containing protein 38		LOC_Os03g41330.1 | DUF260 domain containing protein, putative, expressed		B3		0	0	0	1	0	0	0	0	1	0	0	0	1	0	1	1	0	0
Bradi1g14565	AT4G15940.1 | Fumarylacetoacetate (FAA) hydrolase family		LOC_Os03g61330.1 | fumarylacetoacetase, putative, expressed,LOC_Os03g61330.2 | fumarylacetoacetase, putative, expressed		N/A		0	0	0	0	0	0	0	0	0	0	0	0	0	0	0	0	1	0
Bradi1g14567	No hits found		No hits found		N/A		0	0	0	0	1	0	0	0	1	0	0	0	0	0	1	3	0	0
Bradi1g14570	AT1G24625.1 | zinc finger protein 7		LOC_Os03g41110.1 | ZOS3-14 - C2H2 zinc finger protein, expressed		Dof		0	1	0	1	0	1	1	1	1	0	1	0	3	1	0	0	0	0
Bradi1g14572	No hits found		No hits found		N/A		0	0	0	2	0	1	0	0	0	0	0	0	0	0	0	0	0	0
Bradi1g14575	AT5G43080.1 | Cyclin A3;1		LOC_Os03g41100.1 | cyclin, putative, expressed		N/A		0	0	0	0	1	0	0	0	0	0	0	0	1	1	0	0	0	0
Bradi1g14580	AT2G14910.1 |		LOC_Os03g41080.1 | seed maturation protein PM23, putative, expressed		N/A		0	0	0	0	1	0	0	0	2	0	0	0	1	0	0	0	0	0
Bradi1g14590	AT1G78010.1 | tRNA modification GTPase, putative		LOC_Os08g31460.1 | GTPase of unknown function domain containing protein, putative, expressed		N/A		1	0	0	1	2	0	0	0	1	0	0	0	2	0	1	4	0	0
Bradi1g14600	AT1G47240.1 | NRAMP metal ion transporter 2		LOC_Os12g39180.1 | natural resistance-associated macrophage protein, putative, expressed		bHLH		0	0	0	0	0	0	0	0	0	0	0	0	0	2	0	0	0	0
Bradi1g14606	AT2G39540.1 | Gibberellin-regulated family protein		LOC_Os03g41060.1 | GASR2 - Gibberellin-regulated GASA/GAST/Snakin family protein precursor, putative, expressed		N/A		0	0	0	0	1	0	0	0	2	0	0	0	0	0	0	0	0	0
Bradi1g14608	AT3G19540.1 | Protein of unknown function (DUF620)		LOC_Os12g39160.1 | expressed protein,LOC_Os03g40930.1 | expressed protein		N/A		0	0	0	1	0	0	0	0	1	0	0	0	0	0	0	0	0	0
Bradi1g14610	No hits found		No hits found		N/A		0	0	0	0	0	0	0	0	0	0	0	0	0	0	0	0	1	0
Bradi1g14615	AT5G67360.1 | Subtilase family protein		LOC_Os03g40830.1 | OsSub30 - Putative Subtilisin homologue, expressed		N/A		0	0	0	1	0	1	0	0	0	0	0	0	0	0	1	6	0	0
Bradi1g14620	No hits found		No hits found		N/A		0	0	0	0	0	2	0	0	0	0	0	0	0	1	0	0	0	0
Bradi1g14630	AT5G54160.1 | O-methyltransferase 1		LOC_Os08g06100.1 | O-methyltransferase, putative, expressed		N/A		0	2	0	0	0	0	0	0	2	0	1	0	0	0	1	2	1	0
Bradi1g14650	AT1G49870.1 |		LOC_Os03g40780.1 | transport protein-related, putative, expressed		N/A		1	0	0	0	1	0	1	0	0	0	0	0	1	1	1	6	0	0
Bradi1g14660	AT5G67390.1 |		LOC_Os03g40770.1 | expressed protein		N/A		0	0	0	1	0	0	0	0	0	0	0	0	1	1	1	9	0	0
Bradi1g14670	AT4G37320.1 | cytochrome P450, family 81, subfamily D, polypeptide 5		LOC_Os03g55240.1 | cytochrome P450, putative, expressed		N/A		0	0	0	1	0	0	0	1	0	0	0	0	1	0	1	6	0	0
Bradi1g14677	AT1G03750.1 | switch 2		LOC_Os05g15890.1 | SNF2 family N-terminal domain containing protein, expressed		LBD		0	1	1	1	0	0	0	1	2	0	0	0	0	1	1	1	0	0
Bradi1g14690	AT4G30880.1 | Bifunctional inhibitor/lipid-transfer protein/seed storage 2S albumin superfamily protein		LOC_Os03g25350.1 | LTPL36 - Protease inhibitor/seed storage/LTP family protein precursor, expressed		N/A		0	1	0	0	0	0	0	0	0	0	0	0	1	0	1	3	0	0
Bradi1g14700	No hits found		No hits found		N/A		0	0	0	0	0	0	0	0	0	0	0	0	0	1	0	0	1	0
Bradi1g14710	AT1G12360.1 | Sec1/munc18-like (SM) proteins superfamily		LOC_Os02g25580.1 | Sec1 family transport protein, putative, expressed		N/A		0	2	2	0	0	1	0	0	0	0	0	0	0	1	1	5	1	0
Bradi1g14720	AT1G26610.1 | C2H2-like zinc finger protein		LOC_Os03g40710.1 | ZOS3-13 - C2H2 zinc finger protein, expressed		N/A		0	2	1	1	0	0	0	0	0	0	0	0	0	2	1	3	1	0
Bradi1g14730	AT2G29900.1 | Presenilin-2		LOC_Os03g40700.1 | presenilin, putative, expressed		N/A		0	0	0	0	0	0	0	0	1	0	0	0	1	1	1	1	1	0
Bradi1g14740	No hits found		No hits found		N/A		1	1	0	0	2	1	1	0	0	0	0	0	1	0	1	3	0	0
Bradi1g14745	AT5G55840.1 | Pentatricopeptide repeat (PPR) superfamily protein		LOC_Os03g40690.1 | PPR repeat containing protein, expressed		N/A		0	1	0	3	0	0	1	0	1	0	0	0	1	1	1	7	0	0
Bradi1g14750	AT1G76360.1 | Protein kinase superfamily protein		LOC_Os02g02600.1 | serine/threonine-protein kinase Cx32, chloroplast precursor, putative, expressed		C2H2		0	2	1	1	1	2	1	0	0	0	0	0	0	0	1	4	0	0
Bradi1g14760	No hits found		No hits found		N/A		0	0	0	1	0	0	0	1	0	0	0	1	1	2	0	0	0	1
Bradi1g14770	AT5G08030.1 | PLC-like phosphodiesterases superfamily protein		LOC_Os03g40670.1 | glycerophosphoryl diester phosphodiesterase family protein, putative, expressed		N/A		0	0	0	1	0	0	0	0	0	0	0	0	0	2	1	1	1	0
Bradi1g14780	AT5G08030.1 | PLC-like phosphodiesterases superfamily protein		LOC_Os03g40670.1 | glycerophosphoryl diester phosphodiesterase family protein, putative, expressed		LBD		0	0	0	2	1	0	0	0	1	0	0	0	1	0	1	2	0	1
Bradi1g14790	AT5G08040.1 | mitochondrial import receptor subunit TOM5 homolog		LOC_Os12g38650.1 | expressed protein		N/A		0	0	0	0	0	1	0	0	0	0	0	0	0	1	1	2	0	1
Bradi1g14800	AT3G09860.1 |		LOC_Os03g38120.1 | expressed protein		N/A		0	0	0	1	0	1	0	0	0	0	0	0	2	2	1	2	1	1
Bradi1g14810	AT4G34340.1 | TBP-associated factor 8		LOC_Os03g40650.1 | bromodomain associated family protein, expressed		N/A		0	0	0	0	1	1	1	0	2	0	0	0	1	0	1	2	0	1
Bradi1g14815	AT1G69200.1 | fructokinase-like 2		LOC_Os03g40550.1 | kinase, pfkB family, putative, expressed		N/A		0	0	0	0	0	0	0	0	1	0	0	0	0	1	0	0	0	0
Bradi1g14820	AT4G30000.2 | Dihydropterin pyrophosphokinase / Dihydropteroate synthase		LOC_Os07g42632.2 | folic acid synthesis protein, putative, expressed,LOC_Os07g42632.1 | folic acid synthesis protein, putative, expressed		N/A		0	0	0	0	0	0	0	0	0	0	0	0	0	0	1	4	0	0
Bradi1g14830	AT3G30180.1 | brassinosteroid-6-oxidase 2		LOC_Os03g40540.1 | cytochrome P450, putative, expressed		N/A		1	2	1	0	0	0	0	1	3	0	0	0	1	0	0	0	0	0
Bradi1g14835	No hits found		No hits found		N/A		1	0	0	0	0	0	0	0	0	0	0	0	0	1	1	1	0	0
Bradi1g14840	AT1G13690.1 | ATPase E1		LOC_Os03g40310.1 | RNA recognition motif containing protein, putative, expressed		N/A		0	0	0	0	1	1	0	0	0	0	0	0	0	0	1	2	0	0
Bradi1g14845	AT5G15650.1 | reversibly glycosylated polypeptide 2		LOC_Os03g40270.1 | alpha-1,4-glucan-protein synthase, putative, expressed		N/A		0	0	0	0	1	0	0	0	1	0	0	0	1	0	1	2	1	0
Bradi1g14850	No hits found		No hits found		N/A		0	2	1	1	1	0	0	0	1	0	0	0	0	2	0	0	0	0
Bradi1g14855	AT3G02300.1 | Regulator of chromosome condensation (RCC1) family protein		LOC_Os03g40260.1 | Regulator of chromosome condensation domain containing protein, expressed		N/A		0	0	0	1	0	0	0	0	0	1	0	0	0	1	0	0	0	0
Bradi1g14860	AT1G19660.1 | Wound-responsive family protein		LOC_Os08g26870.2 | wound responsive protein, putative, expressed		N/A		0	0	0	0	0	1	0	1	0	0	0	0	1	0	0	0	0	0
Bradi1g14863	AT5G38900.1 | Thioredoxin superfamily protein		No hits found		N/A		0	0	0	0	0	0	0	2	0	0	0	0	0	0	1	1	0	0
Bradi1g14870	AT5G15790.1 | RING/U-box superfamily protein		LOC_Os03g40170.1 | zinc finger, C3HC4 type domain containing protein, expressed,LOC_Os03g40170.2 | zinc finger, C3HC4 type domain containing protein, expressed		N/A		0	0	0	1	0	0	0	0	2	0	0	0	0	0	1	1	0	0
Bradi1g14877	AT1G69080.1 | Adenine nucleotide alpha hydrolases-like superfamily protein		LOC_Os03g40130.1 | universal stress protein domain containing protein, putative, expressed		N/A		0	1	1	0	0	0	1	0	1	0	0	0	0	0	0	0	0	0
Bradi1g14890	AT1G69070.1 |		LOC_Os03g40110.1 | nop14-like family protein, expressed		N/A		0	0	0	0	0	0	0	1	0	0	0	0	0	1	0	0	0	0
Bradi1g14900	AT1G69040.2 | ACT domain repeat 4		LOC_Os03g40100.1 | ACT domain containing protein, expressed		N/A		0	1	0	0	1	0	2	0	1	0	0	0	0	0	1	1	0	0
Bradi1g14910	AT2G37650.1 | GRAS family transcription factor		LOC_Os03g40080.1 | GRAS family transcription factor containing protein, expressed		N/A		0	0	0	0	0	1	0	1	2	0	0	0	2	0	1	1	0	0
Bradi1g14915	AT5G08100.1 | N-terminal nucleophile aminohydrolases (Ntn hydrolases) superfamily protein,AT5G08100.2 | N-terminal nucleophile aminohydrolases (Ntn hydrolases) superfamily protein		LOC_Os03g40070.1 | transposon protein, putative, unclassified, expressed		N/A		0	0	0	0	0	0	1	0	0	0	0	0	1	1	1	1	0	1
Bradi1g14927	AT5G08100.1 | N-terminal nucleophile aminohydrolases (Ntn hydrolases) superfamily protein		LOC_Os03g40070.1 | transposon protein, putative, unclassified, expressed		N/A		0	0	0	0	0	0	0	0	1	0	0	0	2	1	1	6	0	0
Bradi1g14940	AT3G48710.1 | DEK domain-containing chromatin associated protein		LOC_Os03g40010.1 | DEK C terminal domain containing protein, expressed		N/A		0	1	1	0	0	0	0	0	0	0	0	0	1	0	0	0	0	0
Bradi1g14950	No hits found		LOC_Os03g39980.1 | expressed protein		C2H2		0	0	0	0	0	2	0	0	0	0	0	0	0	0	1	1	0	0
Bradi1g14960	AT3G48670.2 | XH/XS domain-containing protein		LOC_Os01g44230.1 | transcription factor X1, putative, expressed		N/A		0	1	0	0	0	1	0	0	0	0	0	0	2	0	1	1	0	0
Bradi1g14965	AT4G13500.1 |		LOC_Os03g39830.1 | expressed protein		N/A		0	0	0	0	0	1	0	1	0	0	0	0	2	1	1	1	0	0
Bradi1g14971	AT5G55640.1 |		LOC_Os03g39820.1 | expressed protein		N/A		0	0	0	0	0	0	0	0	0	0	0	0	0	0	1	2	0	0
Bradi1g14976	AT3G26320.1 | cytochrome P450, family 71, subfamily B, polypeptide 36		LOC_Os03g39760.1 | cytochrome P450, putative, expressed		N/A		0	0	0	1	0	0	0	1	0	0	0	0	0	1	0	0	1	0
Bradi1g14978	No hits found		LOC_Os11g36920.1 | expressed protein		N/A		0	0	0	0	0	0	0	0	0	1	0	0	1	0	0	0	0	0
Bradi1g14980	AT3G54250.1 | GHMP kinase family protein		LOC_Os02g01920.1 | GHMP kinases ATP-binding protein, putative, expressed		N/A		0	2	1	1	0	0	0	0	0	0	0	0	2	0	0	0	1	0
Bradi1g14983	AT5G46940.1 | Plant invertase/pectin methylesterase inhibitor superfamily protein		LOC_Os12g40760.1 | expressed protein		N/A		0	0	0	0	0	0	0	0	0	0	0	0	1	0	0	0	0	0
Bradi1g14986	No hits found		LOC_Os12g40750.1 | pectinesterase inhibitor domain containing protein, putative, expressed		N/A		1	2	0	0	0	0	0	0	4	0	0	0	1	0	1	4	0	0
Bradi1g14990	No hits found		LOC_Os09g15660.1 | expressed protein		N/A		0	0	0	0	0	0	0	0	1	0	0	0	0	0	1	5	0	0
Bradi1g15000	AT3G18524.1 | MUTS homolog 2		LOC_Os05g19270.1 | MSH-like DNA mismatch repair protein, putative, expressed		N/A		0	0	0	0	0	1	0	0	1	0	0	0	0	2	1	1	0	0
Bradi1g15010	AT1G55930.1 | CBS domain-containing protein / transporter associated domain-containing protein		LOC_Os03g39640.2 | CBS domain containing protein, expressed		N/A		0	0	0	0	0	0	0	0	0	0	0	0	1	0	0	0	0	0
Bradi1g15020	No hits found		LOC_Os10g21860.1 | expressed protein		N/A		0	0	0	0	0	1	0	0	0	0	0	0	0	0	0	0	1	0
Bradi1g15030	AT3G27690.1 | photosystem II light harvesting complex gene 2.3		LOC_Os03g39610.1 | chlorophyll A-B binding protein, putative, expressed		N/A		0	1	1	1	0	1	1	1	0	0	0	0	2	2	1	1	0	0
Bradi1g15035	No hits found		No hits found		N/A		0	1	0	1	0	1	0	0	0	0	0	0	0	2	0	0	0	2
Bradi1g15040	AT4G29090.1 | Ribonuclease H-like superfamily protein		LOC_Os11g03360.1 | RNA-directed DNA polymerase, putative, expressed		N/A		0	0	0	1	0	0	0	0	0	0	0	0	1	0	0	0	1	0
Bradi1g15050	AT3G57270.1 | beta-1,3-glucanase 1		LOC_Os05g31140.1 | glycosyl hydrolases family 17, putative, expressed		N/A		0	1	0	0	0	0	0	0	0	0	0	0	1	0	0	0	0	0
Bradi1g15055	AT3G22060.1 | Receptor-like protein kinase-related family protein		LOC_Os03g36650.1 | cysteine-rich repeat secretory protein 55 precursor, putative, expressed		N/A		0	0	0	0	0	0	0	0	0	0	0	0	0	1	0	0	0	0
Bradi1g15060	AT4G01897.1 |		LOC_Os03g36630.1 | expressed protein		N/A		0	0	0	0	1	1	1	0	1	0	0	0	1	0	0	0	0	0
Bradi1g15065	AT3G22440.1 | FRIGIDA-like protein		LOC_Os03g39160.1 | frigida, putative, expressed		N/A		0	0	0	0	1	0	0	0	1	0	0	0	1	1	1	2	0	0
Bradi1g15070	AT5G48385.1 | FRIGIDA-like protein		LOC_Os03g39129.1 | frigida, putative, expressed		N/A		0	1	1	0	0	0	0	0	1	0	0	0	1	0	1	2	0	0
Bradi1g15090	AT3G20150.1 | Kinesin motor family protein		LOC_Os03g39020.1 | Kinesin motor domain domain containing protein, expressed		N/A		0	0	0	0	0	0	0	1	1	0	0	0	1	0	0	0	0	0
Bradi1g15100	AT1G50575.1 | Putative lysine decarboxylase family protein		LOC_Os03g39010.1 | possible lysine decarboxylase domain containing protein, expressed		N/A		0	0	0	1	0	1	0	0	0	0	0	0	1	1	1	3	0	0
Bradi1g15110	AT3G25270.1 | Ribonuclease H-like superfamily protein		LOC_Os01g41145.1 | retrotransposon protein, putative, unclassified, expressed		N/A		0	0	0	1	0	0	0	1	0	0	0	0	0	1	0	0	1	0
Bradi1g15120	AT3G02870.1 | Inositol monophosphatase family protein		LOC_Os03g39000.2 | inositol-1-monophosphatase, putative, expressed		N/A		0	0	0	0	0	0	0	1	1	0	0	0	0	0	1	2	0	0
Bradi1g15123	AT2G03270.1 | DNA-binding protein, putative		LOC_Os03g38990.1 | DNA-binding protein, putative, expressed		GRAS		0	1	0	0	0	0	0	0	0	0	0	0	0	0	1	1	1	0
Bradi1g15126	AT3G11710.1 | lysyl-tRNA synthetase 1		LOC_Os03g38980.1 | tRNA synthetases class II domain containing protein, expressed		N/A		0	0	0	1	0	1	1	0	0	2	0	0	0	2	1	1	1	0
Bradi1g15130	AT3G62010.1 |		LOC_Os03g38970.1 | metal ion binding protein, putative, expressed		N/A		0	0	0	1	0	1	0	0	0	0	0	0	1	0	1	2	1	0
Bradi1g15140	AT2G04630.1 | RNA polymerase Rpb6		LOC_Os03g38960.1 | DNA-directed RNA polymerase subunit, putative, expressed		N/A		0	0	0	0	0	1	0	0	0	0	0	0	0	0	1	1	0	0
Bradi1g15150	AT3G15840.1 | post-illumination chlorophyll fluorescence increase		LOC_Os03g38950.1 | chloroplast post-illumination chlorophyll fluorescence increase protein, putative, expressed		N/A		0	0	0	1	1	0	1	1	1	0	0	0	1	0	1	1	2	0
Bradi1g15161	AT2G35610.1 | xyloglucanase 113		LOC_Os03g38930.1 | expressed protein		N/A		0	0	0	0	2	0	2	1	0	0	0	0	2	1	1	2	0	1
Bradi1g15170	AT5G65590.1 | Dof-type zinc finger DNA-binding family protein		LOC_Os03g38870.1 | dof zinc finger domain containing protein, putative, expressed		N/A		0	0	0	0	1	1	2	0	1	0	1	0	0	0	1	1	0	0
Bradi1g15180	AT1G19660.2 | Wound-responsive family protein,AT1G19660.1 | Wound-responsive family protein		LOC_Os01g50622.4 | DNA-binding protein DSP1, putative, expressed		N/A		0	0	0	0	0	3	0	0	0	0	0	0	0	2	1	1	0	0
Bradi1g15190	AT3G03300.3 | dicer-like 2,AT3G03300.1 | dicer-like 2		LOC_Os03g38740.1 | Dicer, putative, expressed		N/A		0	0	0	2	0	0	1	0	0	0	0	0	2	0	1	1	1	0
Bradi1g15201	AT1G52870.2 | Peroxisomal membrane 22 kDa (Mpv17/PMP22) family protein		LOC_Os03g38730.1 | peroxisomal membrane protein, putative, expressed		N/A		0	0	0	1	1	0	1	0	2	0	0	1	1	2	1	6	0	0
Bradi1g15215	No hits found		No hits found		N/A		0	1	0	0	1	0	0	1	1	0	0	0	0	0	1	6	0	0
Bradi1g15230	No hits found		LOC_Os07g48590.1 | retrotransposon protein, putative, unclassified		N/A		1	1	0	0	0	0	0	0	1	0	0	0	0	0	1	11	1	0
Bradi1g15242	AT1G67580.1 | Protein kinase superfamily protein		LOC_Os09g27350.1 | RIO1 family protein, expressed		N/A		0	0	0	0	0	1	0	0	2	0	0	0	0	0	1	9	1	0
Bradi1g15252	AT4G38180.1 | FAR1-related sequence 5		LOC_Os06g13740.1 | transposon protein, putative, unclassified, expressed		N/A		0	0	0	1	0	0	0	0	2	0	0	0	2	2	1	3	0	0
Bradi1g15260	AT5G48670.1 | AGAMOUS-like 80		LOC_Os03g38610.1 | OsMADS87 - MADS-box family gene with M-gamma type-box, expressed		N/A		0	0	0	0	0	1	0	0	1	0	0	0	0	0	1	1	0	0
Bradi1g15270	AT1G61250.1 | secretory carrier 3		LOC_Os03g38600.1 | secretory carrier-associated membrane protein, putative, expressed		N/A		0	1	0	0	0	0	0	1	1	0	0	0	2	0	1	1	0	1
Bradi1g15280	AT1G61250.1 | secretory carrier 3,AT2G20840.1 | Secretory carrier membrane protein (SCAMP) family protein		LOC_Os03g38590.1 | secretory carrier-associated membrane protein 4, putative, expressed		N/A		0	0	0	1	0	2	0	0	0	0	0	0	0	2	0	0	0	0
Bradi1g15290	No hits found		LOC_Os12g31340.1 | OsFBD15 - F-box and FBD domain containing protein, expressed		N/A		0	1	1	3	0	0	1	0	0	0	0	0	1	0	1	4	1	0
Bradi1g15291	AT4G33170.1 | Tetratricopeptide repeat (TPR)-like superfamily protein		LOC_Os03g38580.1 | pentatricopeptide, putative, expressed		N/A		0	2	0	0	0	0	0	0	0	0	0	0	0	0	1	9	0	0
Bradi1g15292	AT2G20830.1 | transferases;folic acid binding		LOC_Os03g38540.1 | folic acid binding protein, putative, expressed		N/A		0	0	0	0	0	0	0	0	0	0	0	0	0	0	0	0	0	0
Bradi1g15295	No hits found		No hits found		N/A		0	0	0	0	0	1	0	0	0	0	0	0	1	0	0	0	1	0
Bradi1g15297	AT2G20820.1 |		LOC_Os03g38520.1 | expressed protein		N/A		0	0	0	0	0	1	0	0	0	1	0	0	2	1	1	2	0	0
Bradi1g15300	AT3G13677.2 |		LOC_Os03g38500.1 | expressed protein		N/A		0	0	0	0	0	0	0	0	1	0	0	0	0	0	0	0	0	0
Bradi1g15310	AT2G20815.1 | Family of unknown function (DUF566)		LOC_Os03g38480.1 | expressed protein		N/A		0	0	0	0	0	0	0	0	0	0	0	0	0	5	1	1	0	0
Bradi1g15317	AT5G55050.1 | GDSL-like Lipase/Acylhydrolase superfamily protein		LOC_Os03g38470.1 | GDSL-like lipase/acylhydrolase, putative, expressed		N/A		0	0	0	0	0	1	0	0	0	0	0	0	1	0	0	0	0	0
Bradi1g15330	AT5G55050.1 | GDSL-like Lipase/Acylhydrolase superfamily protein		LOC_Os03g38470.1 | GDSL-like lipase/acylhydrolase, putative, expressed		N/A		0	0	0	1	1	0	1	0	0	0	0	0	1	0	0	0	0	0
Bradi1g15340	AT2G32480.1 | ARABIDOPSIS SERIN PROTEASE		LOC_Os03g38230.1 | peptidase M50 family protein, putative, expressed		N/A		0	0	0	0	0	1	0	1	1	1	0	0	2	0	1	1	0	0
Bradi1g15345	No hits found		No hits found		N/A		0	0	0	0	0	0	0	0	0	0	0	0	0	0	1	1	0	0
Bradi1g15350	AT2G32460.1 | myb domain protein 101		LOC_Os03g38210.1 | MYB family transcription factor, putative, expressed		N/A		0	0	0	0	1	0	0	0	0	0	0	0	2	0	0	0	0	0
Bradi1g15360	AT1G05170.2 | Galactosyltransferase family protein		LOC_Os03g38050.1 | galactosyltransferase, putative, expressed		N/A		0	1	0	1	0	2	0	0	1	0	0	0	0	0	1	1	0	0
Bradi1g15370	No hits found		No hits found		N/A		0	0	0	0	0	1	0	1	1	0	0	0	2	0	0	0	0	0
Bradi1g15377	AT1G05260.1 | Peroxidase superfamily protein		LOC_Os06g29470.1 | peroxidase precursor, putative, expressed		N/A		0	0	0	0	0	2	0	0	2	0	0	0	1	0	1	2	0	1
Bradi1g15390	AT4G13420.1 | high affinity K+ transporter 5		LOC_Os03g37840.1 | potassium transporter, putative, expressed		N/A		0	0	0	0	0	1	0	0	1	0	0	0	1	3	1	1	0	0
Bradi1g15400	No hits found		No hits found		N/A		0	0	0	0	0	2	0	0	0	0	0	0	0	1	0	0	0	0
Bradi1g15410	AT1G74700.1 | tRNAse Z1		LOC_Os02g12290.1 | nuclear ribonuclease Z, putative, expressed		N/A		0	1	1	0	1	1	0	0	2	1	0	0	1	0	1	1	0	0
Bradi1g15420	No hits found		No hits found		Dof		0	0	0	0	0	0	0	0	0	0	0	0	0	1	1	8	2	1
Bradi1g15430	AT5G47610.1 | RING/U-box superfamily protein		LOC_Os02g01700.1 | RNA recognition motif containing protein, putative, expressed		N/A		0	0	0	1	0	0	0	0	1	0	0	0	0	0	1	2	0	1
Bradi1g15440	AT5G37890.1 | Protein with RING/U-box and TRAF-like domains		LOC_Os01g55640.1 | seven in absentia protein family protein, putative, expressed		N/A		0	1	0	0	0	2	0	0	0	0	0	0	0	1	1	2	0	0
Bradi1g15450	AT1G19020.1 |		LOC_Os03g37810.1 | expressed protein		N/A		0	1	0	0	1	1	1	0	0	1	0	0	0	0	1	5	0	0
Bradi1g15460	AT3G14460.1 | LRR and NB-ARC domains-containing disease resistance protein		LOC_Os03g37720.1 | NBS-LRR type disease resistance protein Rps1-k-1, putative, expressed		N/A		0	0	0	0	0	0	1	0	1	0	0	0	1	1	1	1	2	0
Bradi1g15465	No hits found		LOC_Os03g37770.1 | expressed protein		N/A		0	2	0	0	0	0	0	0	1	0	0	0	0	2	1	1	1	0
Bradi1g15470	No hits found		No hits found		N/A		0	0	0	2	1	0	0	1	0	0	0	0	0	1	0	0	0	0
Bradi1g15474	AT3G21690.1 | MATE efflux family protein		LOC_Os03g37640.1 | MATE efflux family protein, putative, expressed		FAR1		0	0	0	2	0	0	0	0	0	0	0	0	2	0	0	0	0	0
[truncated: 32,317 more rows]
