# Supplementary material for: Time-series transcriptome of Brachypodium distachyon during bacterial flagellin-induced pattern-triggered immunity
Source: Front Plant Sci. 2022 Sep 15;13:1004184. doi: 10.3389/fpls.2022.1004184 (PMC9521188; doi:10.3389/fpls.2022.1004184)
Supplement: Supplementary Table 8 — Over-representation analysis of transcription factors (upper) and cis-elements (lower) in each DEG cluster of transcriptome analysis of Brachypodium distachyon in response to flg22 (used for ). [file Table_8.xlsx]

## Sheet: TableS8
Supplementary Table S8. Over-representation analysis of transcription factors (upper) and cis-elements (lower) in each DEG cluster of transcriptome analysis of Brachypodium distachyon in response to flg22 (used for Figure 6)
Cluster		1		2		3		4		5		6		7		8		9		10
numbera		382		687		999		426		556		466		455		795		617		656
cis-element	numberb	p value	numberc	p value	numberc	p value	numberc	p value	numberc	p value	numberc	p value	numberc	p value	numberc	p value	numberc	p value	numberc	p value	numberc
ERF	138	3.07414e-13	17	1	0	0.109	7	0.512732	2	0.657	2	0.040546	5	1	0	0.961	1	1	0	1	0
bHLH	146	0.0240743	5	0.948149	1	0.134956	7	0.109147	4	0.0320995	6	0.864777	1	0.858192	1	0.251047	5	0.489704	3	0.305603	4
bZIP	86	0.0713907	3	0.516079	2	0.718455	2	0.658982	1	0.755079	1	1	0	0.68322	1	0.867171	1	0.459484	2	0.227116	3
MYB	117	0.142313	3	1	0	0.858	2	0.0155671	5	0.0122	6	0.00536049	6	1	0	0.936	1	0.880782	1	0.388	3
NAC	136	0.00428394	6	1	0	0.909	2	0.817781	1	0.0238	6	0.55322	2	0.540284	2	0.827	2	1	0	0.483	3
WRKY	87	0.00291929	5	1	0	0.00022072	10	0.00076564	6	1.50783e-06	10	0.030959	4	0.32103	2	0.601816	2	1	0	1	0
aNumbers of all genes in each cluster
bNumbers of the indicated transcription factor genes in the genome
cNumbers of the indicated transcription factor genes in each cluster
Cluster		1		2		3		4		5		6		7		8		9		10		TF	Sequence
numbera		382		687		999		426		556		466		455		795		617		656
cis-element	numberb	p value	numberc	p value	numberc	p value	numberc	p value	numberc	p value	numberc	p value	numberc	p value	numberc	p value	numberc	p value	numberc	p value	numberc
GCC-box	2243	0.171929	30	0.966651	34	0.966976	52	0.438135	29	0.682264	34	0.412582	32	0.432338	31	0.461566	53	0.353612	43	0.452248	44	bZIP, GBF type	CACGTG
DRE/CRT	9569	0.0697317	120	0.988396	166	0.0682147	300	0.102691	131	0.0596744	172	0.247154	137	0.81117	119	0.47302	223	0.780741	164	0.981421	160	AP2/ERF	(A/G)CCGAC
DRE-like	3717	0.67494	39	0.763603	69	0.0307303	127	0.102691	46	0.00351701	81	0.0681057	61	0.305103	53	0.564824	85	0.707847	63	0.79354	65	AP2/EREBP	(A/G/T)(A/G)CCGACN(A/T)
Myc-related	10752	0.376207	123	0.491084	216	0.0791656	334	0.0302615	152	0.973047	154	0.0162493	168	0.891242	131	0.310021	256	0.264683	201	0.752889	198	MYC	CACATG
G-box	7212	1.99643e-07	123	0.709781	139	0.00716751	242	1.37583e-06	131	0.00981686	140	0.137641	108	0.0559808	110	0.0376281	188	0.84539	120	0.259584	145	bZIP, GBF type	CACGTG
G-box-like	10264	0.00688919	137	0.0899656	222	0.000448401	347	0.0283348	146	0.000217337	205	4.24363e-47	178	0.222457	144	0.121685	253	0.89481	171	0.482482	197	bZIP	CACGT(A/T)
ABRE-like	5766	0.00100582	88	0.0907011	129	0.0666007	186	9.49459e-05	102	0.00368291	118	0.0312455	94	0.155289	85	0.00572006	161	0.94052	90	0.0228584	130	bZIP	(C/G/T)ACGTG(G/T)(A/C)
ACTCAT-element	6741	0.625149	73	0.905652	122	0.251807	205	0.648767	81	0.692202	105	0.544825	91	0.630616	87	0.115472	170	0.48477	122	0.909247	116	bZIPs (some group S)	ACTCAT
TGA-element	15988	0.601582	176	0.695597	314	0.0413256	493	0.0858816	213	0.0333528	281	0.00895651	243	0.335683	217	0.00879114	404	0.687589	282	0.994616	274	bZIP(group D)	TGACG
AtMyb1	2092	0.640051	22	0.756639	38	0.00272849	83	0.963812	18	0.447488	35	0.16035	34	0.662532	26	0.967793	37	0.0931776	46	0.923057	32	MYB	(A/C)TCC(A/T)ACC
AtMyb2	547	0.408358	7	0.858417	8	0.247666	19	0.811098	5	0.879822	6	0.615068	7	0.193356	10	0.204465	16	0.769294	8	0.979913	5	MYB	TAAC(G/C)GTT
AtMyb3	489	0.0982815	9	0.185602	13	0.455315	15	0.858597	4	0.271973	10	0.347288	8	0.204119	9	0.346513	13	0.267551	11	0.719689	8	MYB	TAACTAAC
AtMyb4	14912	0.189451	175	0.502071	299	0.025001	465	0.0288099	205	5.88145e-05	287	0.00018815	241	0.0458666	216	0.414255	349	0.455734	270	0.581717	283	MYB	A(A/C)C(A/T)A(A/C)C
W-box	13130	0.791679	139	0.992389	233	0.494	383	0.742871	157	2.26606e-06	266	6.25047e-07	230	0.0153567	197	0.27	313	9.50681e-14	326	0.549	250	WRKY	TTGAC(C/T)
CG-1 elementd	20571	2.78894e-08	280	0.693289	406	0.0161712	632	0.00327208	283	1	202	1	148	0.661584	269	0.563512	475	0.913111	354	0.911612	377	CAMTA	(A/C/G)CGCG(T/C/G)
aNumbers of all genes in each cluster
bNumbers of the indicated cis-elements in the promoter regions (1 kbp) of all genes in the genome
cNumbers of the indicated cis-elements in the promoter regions (1 kbp) of genes of each cluster
dNumbers of genes that contain at least a single CG-1 element in their promoter regions (1 kbp) in each cluster
