# Supplementary material for: Time-series transcriptome of Brachypodium distachyon during bacterial flagellin-induced pattern-triggered immunity
Source: Front Plant Sci. 2022 Sep 15;13:1004184. doi: 10.3389/fpls.2022.1004184 (PMC9521188; doi:10.3389/fpls.2022.1004184)
Supplement: Supplementary Table 9 — Primers used in this study. [file Table_9.xlsx]

## Sheet: TableS9
Supplementary Table S9. Primers used in this study
Categorized cluster	GeneID	Primer name	Sequence
Cluster5	Bradi1g12377	Bradi1g12377-F	GCTCTACTGTGTTTGCTGATACGA
		Bradi1g12377-R	CAGGTGCGATGGAAATGAAC
	Bradi5g21960	Bradi5g21960-F	GGGGCAATCAAGCAATCAC
		Bradi5g21960-R	AGTCAAAGGACACACCCACATC
Cluster6	Bradi4g11523	Bradi4g11523-F	ACGTCTAGTGGTTTTGCTTCATCC
		Bradi4g11523-R	CGCTAATGACATTTTCCCCACTAC
	Bradi3g39980	Bradi3g39980-F	CGACGTGCTACGTGAAGACC
		Bradi3g39980-R	CGGGATCAACGGATCAATAAAG
Cluster7	Bradi4g27680	Bradi4g27680-F	GGCTTGTTTTCTTCGTTAACAATCG
		Bradi4g27680-R	GACACTCGGAATCAAACAGGTAGG
	Bradi2g24240	Bradi2g24240-F	TTCAGATCAAGCTGCAAAGGTG
		Bradi2g24240-R	CACAGTGTTCCGGCCAAAG
Cluster8	Bradi2g39265	Bradi2g39265-F	TGTGTGTTTGGTCGGTTAATACAAG
		Bradi2g39265-R	GCACAGGAATTAGAAGAAGAGCAAG
	Bradi3g51520	Bradi3g51520-F	TGGGGCATGATGAGTTGG
		Bradi3g51520-R	GCACGAGACACAAGATACGAATAGA
Cluster9	Bradi4g16430	Bradi4g16430-F	CTCCATGAGGGATTCAAAACAG
		Bradi4g16430-R	CATATGTAGACACAAAGCAGCAGAG
	Bradi2g62067	Bradi2g62067-F	TGCGGATTATTCAGGCAAGAG
		Bradi2g62067-R	CAGAGCAGAGCAAAGACACACAC
Cluster10	Bradi3g03770	Bradi3g03770-F	TTTTGGCCATACTAGTTTGCTCTC
		Bradi3g03770-R	GGGCATTTCTATCCTCTCTCTCTC
	Bradi4g07100	Bradi4g07100-F	GTGCTATTTTCTGAGGTTCAAAAGG
		Bradi4g07100-R	AGATGGATTATGGCAACACAAGAG
	Bradi3g04730 Ubi4	BradiUbi4-3Fva	GCTGTTGGAACTGCTGCTATACCT
		BradiUbi4-3Rva	TTGCACCAAACCAACACACACCAG
aChambers, J.P. et al., PLoS One (2012) 7(11):e49372
